# Supplementary material for: Muti-omics revealed the global response of Hordeum vulgare to different wavelength of UV exposure
Source: Research Square preprint supplement (doi:10.21203/rs.3.rs-5763885/v1), 2025-04-23
Supplement: Supplementary file 1 [file 0954505836c49ca6d9d867ea.xlsx]

## Sheet: CC
GO ID	Description	out (167)	All (2738)	pvalue	p.adjust	Genes
GO:0036452	ESCRT complex	5	14	0.00101439	0.236394	A0A8I6XAI2;A0A8I6YLU5;A0A8I7B5C4;F2D2Z9;F2DP42
GO:0044440	endosomal part	8	39	0.00195367	0.236394	A0A287LRJ1;A0A8I6XAI2;A0A8I6YLU5;A0A8I7B5C4;F2D2Z9;F2DP42;F2EEJ9;M0WWJ8
GO:0010008	endosome membrane	6	35	0.0174074	0.576096	A0A287LRJ1;A0A8I6XAI2;A0A8I6YLU5;F2D2Z9;F2DP42;F2EEJ9
GO:0005771	multivesicular body	3	10	0.0194548	0.576096	A0A8I6YLU5;F2D2Z9;F2DA66
GO:0031090	organelle membrane	33	392	0.0286023	0.576096	A0A287LRJ1;A0A287WWM4;A0A8I6WAU3;A0A8I6WRY7;A0A8I6WTG0;A0A8I6X3I3;A0A8I6XAI2;A0A8I6XEP7;A0A8I6XGQ8;A0A8I6XKQ4;A0A8I6XLR3;A0A8I6XTS4;A0A8I6Y4H4;A0A8I6Y8G3;A0A8I6YDV3;A0A8I6YLU5;A0A8I7B5T8;F2CQ37;F2CWH1;F2D2Z9;F2D4G9;F2D8E6;F2DGG1;F2DLT2;F2DNJ1;F2DP42;F2DV56;F2DXG7;F2E0W3;F2E2B0;F2E7F7;F2EBY7;F2EEJ9
GO:0005768	endosome	9	73	0.031248	0.576096	A0A287LRJ1;A0A8I6XAI2;A0A8I6YLU5;A0A8I7B5C4;F2D2Z9;F2DA66;F2DP42;F2EEJ9;M0WWJ8
GO:0005615	extracellular space	5	33	0.0470428	0.576096	A0A142I888;A0A8I6WYU4;A0A8I6Y6G9;F2CZW3;F2DAC4
GO:0000813	ESCRT I complex	2	6	0.0471485	0.576096	A0A8I6XAI2;F2DP42
GO:0000815	ESCRT III complex	2	6	0.0471485	0.576096	A0A8I6YLU5;F2D2Z9
GO:0005801	cis-Golgi network	2	6	0.0471485	0.576096	A0A8I6Y8G3;M0WWJ8
GO:0031967	organelle envelope	18	199	0.0551846	0.576096	A0A287WWM4;A0A8I6WRY7;A0A8I6X3I3;A0A8I6X6U3;A0A8I6XGQ8;A0A8I6XKQ4;A0A8I6YEZ5;A0A8I7B5T8;F2CWH1;F2CXT5;F2D8E6;F2DNJ1;F2DXG7;F2E0W3;F2E1R5;F2E2B0;F2EBY7;F2EGN2
GO:0031975	envelope	18	199	0.0551846	0.576096	A0A287WWM4;A0A8I6WRY7;A0A8I6X3I3;A0A8I6X6U3;A0A8I6XGQ8;A0A8I6XKQ4;A0A8I6YEZ5;A0A8I7B5T8;F2CWH1;F2CXT5;F2D8E6;F2DNJ1;F2DXG7;F2E0W3;F2E1R5;F2E2B0;F2EBY7;F2EGN2
GO:0009941	chloroplast envelope	5	35	0.0583935	0.576096	A0A287WWM4;A0A8I6XGQ8;F2DXG7;F2EBY7;F2EGN2
GO:0044421	extracellular region part	5	35	0.0583935	0.576096	A0A142I888;A0A8I6WYU4;A0A8I6Y6G9;F2CZW3;F2DAC4
GO:0005789	endoplasmic reticulum membrane	11	107	0.058397	0.576096	A0A8I6WAU3;A0A8I6WTG0;A0A8I6XEP7;A0A8I6XTS4;A0A8I6Y4H4;A0A8I6YDV3;F2D4G9;F2DGG1;F2DV56;F2E7F7;F2EEJ9
GO:0042175	nuclear outer membrane-endoplasmic reticulum membrane network	11	107	0.058397	0.576096	A0A8I6WAU3;A0A8I6WTG0;A0A8I6XEP7;A0A8I6XTS4;A0A8I6Y4H4;A0A8I6YDV3;F2D4G9;F2DGG1;F2DV56;F2E7F7;F2EEJ9
GO:0005797	Golgi medial cisterna	1	1	0.0609934	0.576096	A0A8I6Y8G3
GO:0005876	spindle microtubule	1	1	0.0609934	0.576096	A0A8I6X7E0
GO:0009513	etioplast	1	1	0.0609934	0.576096	F2DXG7
GO:0032044	DSIF complex	1	1	0.0609934	0.576096	F2EJZ7
GO:0033565	ESCRT-0 complex	1	1	0.0609934	0.576096	A0A8I7B5C4
GO:0034425	etioplast envelope	1	1	0.0609934	0.576096	F2DXG7
GO:0034426	etioplast membrane	1	1	0.0609934	0.576096	F2DXG7
GO:0043527	tRNA methyltransferase complex	1	1	0.0609934	0.576096	F2ELG2
GO:0071261	Ssh1 translocon complex	1	1	0.0609934	0.576096	F2D4G9
GO:0031969	chloroplast membrane	4	25	0.0618946	0.576096	A0A287WWM4;A0A8I6XGQ8;F2DXG7;F2EBY7
GO:0044425	membrane part	25	302	0.0647715	0.580544	A0A8I6WAU3;A0A8I6WTG0;A0A8I6WUP0;A0A8I6XAI2;A0A8I6XEP7;A0A8I6XKQ4;A0A8I6XTS4;A0A8I6Y4H4;A0A8I6Y8G3;A0A8I6YDV3;A0A8I6YLU5;A0A8I7B5T8;F2CQ37;F2CWH1;F2D2Z9;F2D4G9;F2DGG1;F2DKP3;F2DNJ1;F2DP42;F2DV56;F2E0W3;F2E2B0;F2E7F7;F2EEJ9
GO:0000786	nucleosome	5	37	0.07118	0.59153	A0A8I6WKT1;A0A8I6X313;A0A8I6XLD0;A0A8I6XQU3;A0A8I6YL06
GO:0098588	bounding membrane of organelle	22	262	0.0713841	0.59153	A0A287LRJ1;A0A8I6WAU3;A0A8I6WTG0;A0A8I6XAI2;A0A8I6XEP7;A0A8I6XLR3;A0A8I6XTS4;A0A8I6Y4H4;A0A8I6Y8G3;A0A8I6YDV3;A0A8I6YLU5;F2CQ37;F2D2Z9;F2D4G9;F2D8E6;F2DGG1;F2DLT2;F2DP42;F2DV56;F2DXG7;F2E7F7;F2EEJ9
GO:0005576	extracellular region	13	139	0.0775722	0.59153	A0A142I888;A0A287DTW3;A0A8I6WHB0;A0A8I6WYU4;A0A8I6Y6G9;A0A8I6YSV4;F2CTU5;F2CV55;F2CZW3;F2D903;F2DAC4;F2DXR4;F2EGH1
GO:0044815	DNA packaging complex	5	38	0.0781068	0.59153	A0A8I6WKT1;A0A8I6X313;A0A8I6XLD0;A0A8I6XQU3;A0A8I6YL06
GO:0042170	plastid membrane	4	27	0.0782188	0.59153	A0A287WWM4;A0A8I6XGQ8;F2DXG7;F2EBY7
GO:0009526	plastid envelope	5	40	0.0930061	0.650582	A0A287WWM4;A0A8I6XGQ8;F2DXG7;F2EBY7;F2EGN2
GO:0044432	endoplasmic reticulum part	12	130	0.0948185	0.650582	A0A8I6WAU3;A0A8I6WTG0;A0A8I6XEP7;A0A8I6XTS4;A0A8I6Y4H4;A0A8I6YDV3;F2CPT7;F2D4G9;F2DGG1;F2DV56;F2E7F7;F2EEJ9
GO:0032993	protein-DNA complex	5	42	0.109258	0.650582	A0A8I6WKT1;A0A8I6X313;A0A8I6XLD0;A0A8I6XQU3;A0A8I6YL06
GO:0000221	vacuolar proton-transporting V-type ATPase, V1 domain	1	2	0.118288	0.650582	F2CQ37
GO:0009898	cytoplasmic side of plasma membrane	1	2	0.118288	0.650582	F2D2Z9
GO:0031985	Golgi cisterna	1	2	0.118288	0.650582	A0A8I6Y8G3
GO:0032153	cell division site	1	2	0.118288	0.650582	A0A8I6X0W8
GO:0034708	methyltransferase complex	1	2	0.118288	0.650582	F2ELG2
GO:0071020	post-spliceosomal complex	1	2	0.118288	0.650582	F2D0F3
GO:0072380	TRC complex	1	2	0.118288	0.650582	A0A8I7B4D8
GO:0098562	cytoplasmic side of membrane	1	2	0.118288	0.650582	F2D2Z9
GO:1990071	TRAPPII protein complex	1	2	0.118288	0.650582	M0WWJ8
GO:0098796	membrane protein complex	18	226	0.141195	0.725395	A0A8I6WUP0;A0A8I6XAI2;A0A8I6XEP7;A0A8I6XKQ4;A0A8I6Y8G3;A0A8I6YLU5;A0A8I7B5T8;F2CQ37;F2CWH1;F2D2Z9;F2D4G9;F2DKP3;F2DNJ1;F2DP42;F2DV56;F2E0W3;F2E2B0;F2EEJ9
GO:0016020	membrane	59	862	0.154264	0.725395	A0A287LRJ1;A0A287WWM4;A0A8I6W6U7;A0A8I6WAU3;A0A8I6WRY7;A0A8I6WTG0;A0A8I6WUP0;A0A8I6WVD2;A0A8I6X3E1;A0A8I6X3I3;A0A8I6X6U3;A0A8I6XAI2;A0A8I6XD40;A0A8I6XEP7;A0A8I6XFQ6;A0A8I6XGQ8;A0A8I6XJ52;A0A8I6XKQ4;A0A8I6XLR3;A0A8I6XQT6;A0A8I6XTS4;A0A8I6Y1V5;A0A8I6Y4H4;A0A8I6Y6G9;A0A8I6Y8G3;A0A8I6YDV3;A0A8I6YE02;A0A8I6YLU5;A0A8I7B4D8;A0A8I7B5T8;A0A8I7B647;A0A8I7BBX4;A0A8I7BFL0;F2CQ37;F2CWH1;F2D2Z9;F2D4G9;F2D5K0;F…
GO:0005746	mitochondrial respiratory chain	5	47	0.155343	0.725395	A0A8I6XKQ4;F2CWH1;F2DNJ1;F2E0W3;F2E2B0
GO:0008541	proteasome regulatory particle, lid subcomplex	2	12	0.163536	0.725395	A0A8I7B601;F2E3Y1
GO:0055038	recycling endosome membrane	1	3	0.172106	0.725395	A0A287LRJ1
GO:0072379	ER membrane insertion complex	1	3	0.172106	0.725395	A0A8I7B4D8
GO:0044446	intracellular organelle part	62	918	0.175458	0.725395	A0A287LRJ1;A0A287WWM4;A0A8I6WAU3;A0A8I6WDS1;A0A8I6WKT1;A0A8I6WRY7;A0A8I6WTG0;A0A8I6X0W8;A0A8I6X313;A0A8I6X3I3;A0A8I6X6U3;A0A8I6X7E0;A0A8I6XAI2;A0A8I6XD40;A0A8I6XEP7;A0A8I6XGQ8;A0A8I6XKQ4;A0A8I6XLD0;A0A8I6XLR3;A0A8I6XQU3;A0A8I6XTS4;A0A8I6Y4H4;A0A8I6Y8G3;A0A8I6YDV3;A0A8I6YEZ5;A0A8I6YL06;A0A8I6YLU5;A0A8I6YSZ9;A0A8I7B2H8;A0A8I7B5C4;A0A8I7B5T8;F2CPT7;F2CQ37;F2CTA6;F2CUI5;F2CW53;F2CWH1;F2CXT5;F2D0F3;F2…
GO:0031201	SNARE complex	3	24	0.177114	0.725395	A0A8I6WUP0;A0A8I6Y8G3;F2EEJ9
GO:0005788	endoplasmic reticulum lumen	2	13	0.185902	0.725395	A0A8I6Y4H4;F2CPT7
GO:0000785	chromatin	5	50	0.186286	0.725395	A0A8I6WKT1;A0A8I6X313;A0A8I6XLD0;A0A8I6XQU3;A0A8I6YL06
GO:0044422	organelle part	62	926	0.197784	0.725395	A0A287LRJ1;A0A287WWM4;A0A8I6WAU3;A0A8I6WDS1;A0A8I6WKT1;A0A8I6WRY7;A0A8I6WTG0;A0A8I6X0W8;A0A8I6X313;A0A8I6X3I3;A0A8I6X6U3;A0A8I6X7E0;A0A8I6XAI2;A0A8I6XD40;A0A8I6XEP7;A0A8I6XGQ8;A0A8I6XKQ4;A0A8I6XLD0;A0A8I6XLR3;A0A8I6XQU3;A0A8I6XTS4;A0A8I6Y4H4;A0A8I6Y8G3;A0A8I6YDV3;A0A8I6YEZ5;A0A8I6YL06;A0A8I6YLU5;A0A8I6YSZ9;A0A8I7B2H8;A0A8I7B5C4;A0A8I7B5T8;F2CPT7;F2CQ37;F2CTA6;F2CUI5;F2CW53;F2CWH1;F2CXT5;F2D0F3;F2…
GO:0005852	eukaryotic translation initiation factor 3 complex	2	14	0.208664	0.725395	A0A8I6W8C2;F2DXD4
GO:0016282	eukaryotic 43S preinitiation complex	2	14	0.208664	0.725395	A0A8I6W8C2;F2DXD4
GO:0098803	respiratory chain complex	5	53	0.219265	0.725395	A0A8I6XKQ4;F2CWH1;F2DNJ1;F2E0W3;F2E2B0
GO:0000315	organellar large ribosomal subunit	1	4	0.222657	0.725395	F2EIG1
GO:0005751	mitochondrial respiratory chain complex IV	1	4	0.222657	0.725395	F2E2B0
GO:0005762	mitochondrial large ribosomal subunit	1	4	0.222657	0.725395	F2EIG1
GO:0005795	Golgi stack	1	4	0.222657	0.725395	A0A8I6Y8G3
GO:0008023	transcription elongation factor complex	1	4	0.222657	0.725395	F2EJZ7
GO:0030008	TRAPP complex	1	4	0.222657	0.725395	M0WWJ8
GO:0032588	trans-Golgi network membrane	1	4	0.222657	0.725395	A0A287LRJ1
GO:0035145	exon-exon junction complex	1	4	0.222657	0.725395	A0A8I7B2H8
GO:0044613	nuclear pore central transport channel	1	4	0.222657	0.725395	A0A8I6YEZ5
GO:0071014	post-mRNA release spliceosomal complex	1	4	0.222657	0.725395	F2D0F3
GO:0098791	Golgi subcompartment	3	27	0.225203	0.725395	A0A287LRJ1;A0A8I6Y8G3;M0WWJ8
GO:0012505	endomembrane system	30	429	0.228847	0.725395	A0A287LRJ1;A0A8I6WAU3;A0A8I6WTG0;A0A8I6WUP0;A0A8I6X6U3;A0A8I6XAI2;A0A8I6XEP7;A0A8I6XLR3;A0A8I6XTS4;A0A8I6Y4H4;A0A8I6Y8G3;A0A8I6YDV3;A0A8I6YEZ5;A0A8I6YGE1;A0A8I6YLU5;A0A8I6Z597;A0A8I7B5C4;F2CPT7;F2D2Z9;F2D4G9;F2DA66;F2DGG1;F2DLT2;F2DP42;F2DV56;F2E1R5;F2E376;F2E7F7;F2EEJ9;M0WWJ8
GO:0033178	proton-transporting two-sector ATPase complex, catalytic domain	2	15	0.231692	0.725395	A0A8I7B5T8;F2CQ37
GO:0044429	mitochondrial part	13	173	0.253235	0.725395	A0A8I6WRY7;A0A8I6X3I3;A0A8I6XKQ4;A0A8I7B5T8;F2CW53;F2CWH1;F2CXT5;F2D8E6;F2DNJ1;F2E0W3;F2E2B0;F2EGN2;F2EIG1
GO:0033290	eukaryotic 48S preinitiation complex	2	16	0.254871	0.725395	A0A8I6W8C2;F2DXD4
GO:0070993	translation preinitiation complex	2	16	0.254871	0.725395	A0A8I6W8C2;F2DXD4
GO:0098800	inner mitochondrial membrane protein complex	6	71	0.26313	0.725395	A0A8I6XKQ4;A0A8I7B5T8;F2CWH1;F2DNJ1;F2E0W3;F2E2B0
GO:0031984	organelle subcompartment	5	57	0.265733	0.725395	A0A287LRJ1;A0A8I6XD40;A0A8I6Y8G3;F2ECM5;M0WWJ8
GO:0070469	respiratory chain	5	57	0.265733	0.725395	A0A8I6XKQ4;F2CWH1;F2DNJ1;F2E0W3;F2E2B0
GO:0000313	organellar ribosome	1	5	0.270139	0.725395	F2EIG1
GO:0005749	mitochondrial respiratory chain complex II, succinate dehydrogenase complex (ubiquinone)	1	5	0.270139	0.725395	F2CWH1
GO:0005761	mitochondrial ribosome	1	5	0.270139	0.725395	F2EIG1
GO:0030686	90S preribosome	1	5	0.270139	0.725395	F2EG94
GO:0033180	proton-transporting V-type ATPase, V1 domain	1	5	0.270139	0.725395	F2CQ37
GO:0034098	VCP-NPL4-UFD1 AAA ATPase complex	1	5	0.270139	0.725395	A0A8I6XEP7
GO:0045257	succinate dehydrogenase complex (ubiquinone)	1	5	0.270139	0.725395	F2CWH1
GO:0045277	respiratory chain complex IV	1	5	0.270139	0.725395	F2E2B0
GO:0045281	succinate dehydrogenase complex	1	5	0.270139	0.725395	F2CWH1
GO:0045283	fumarate reductase complex	1	5	0.270139	0.725395	F2CWH1
GO:0055037	recycling endosome	1	5	0.270139	0.725395	A0A287LRJ1
GO:0071256	translocon complex	1	5	0.270139	0.725395	F2D4G9
GO:0005635	nuclear envelope	3	30	0.275458	0.725395	A0A8I6X6U3;A0A8I6YEZ5;F2E1R5
GO:0019867	outer membrane	3	30	0.275458	0.725395	F2CWH1;F2D8E6;F2DXG7
GO:0044434	chloroplast part	7	88	0.288254	0.725395	A0A287WWM4;A0A8I6XD40;A0A8I6XGQ8;F2DXG7;F2EBY7;F2ECM5;F2EGN2
GO:0005740	mitochondrial envelope	10	133	0.290666	0.725395	A0A8I6WRY7;A0A8I6X3I3;A0A8I6XKQ4;A0A8I7B5T8;F2CWH1;F2CXT5;F2D8E6;F2DNJ1;F2E0W3;F2E2B0
GO:0005783	endoplasmic reticulum	16	225	0.293759	0.725395	A0A8I6WAU3;A0A8I6WTG0;A0A8I6WUP0;A0A8I6XEP7;A0A8I6XTS4;A0A8I6Y4H4;A0A8I6YDV3;A0A8I6YGE1;A0A8I6Z597;F2CPT7;F2D4G9;F2DGG1;F2DV56;F2E376;F2E7F7;F2EEJ9
GO:0048046	apoplast	2	18	0.301276	0.725395	F2D903;F2EGH1
GO:0044427	chromosomal part	5	61	0.31419	0.725395	A0A8I6WKT1;A0A8I6X313;A0A8I6XLD0;A0A8I6XQU3;A0A8I6YL06
GO:0000275	mitochondrial proton-transporting ATP synthase complex, catalytic core F(1)	1	6	0.314737	0.725395	A0A8I7B5T8
GO:0005765	lysosomal membrane	1	6	0.314737	0.725395	F2CQ37
GO:0005819	spindle	1	6	0.314737	0.725395	A0A8I6X7E0
GO:0008250	oligosaccharyltransferase complex	1	6	0.314737	0.725395	F2DV56
GO:0016471	vacuolar proton-transporting V-type ATPase complex	1	6	0.314737	0.725395	F2CQ37
GO:0045240	dihydrolipoyl dehydrogenase complex	1	6	0.314737	0.725395	F2E2T3
GO:0045252	oxoglutarate dehydrogenase complex	1	6	0.314737	0.725395	F2E2T3
GO:0098552	side of membrane	1	6	0.314737	0.725395	F2D2Z9
GO:0098852	lytic vacuole membrane	1	6	0.314737	0.725395	F2CQ37
GO:0009507	chloroplast	14	198	0.319267	0.728891	A0A287WWM4;A0A8I6X0W8;A0A8I6X6P0;A0A8I6XD40;A0A8I6XGQ8;A0A8I6Y9I1;F2CS15;F2CW53;F2DC91;F2DXG7;F2E0W3;F2EBY7;F2ECM5;F2EGN2
GO:0005747	mitochondrial respiratory chain complex I	3	33	0.326721	0.731385	A0A8I6XKQ4;F2DNJ1;F2E0W3
GO:0044435	plastid part	7	93	0.33839	0.731385	A0A287WWM4;A0A8I6XD40;A0A8I6XGQ8;F2DXG7;F2EBY7;F2ECM5;F2EGN2
GO:0005694	chromosome	5	63	0.338874	0.731385	A0A8I6WKT1;A0A8I6X313;A0A8I6XLD0;A0A8I6XQU3;A0A8I6YL06
GO:0030964	NADH dehydrogenase complex	3	34	0.343855	0.731385	A0A8I6XKQ4;F2DNJ1;F2E0W3
GO:0045271	respiratory chain complex I	3	34	0.343855	0.731385	A0A8I6XKQ4;F2DNJ1;F2E0W3
GO:0044455	mitochondrial membrane part	6	79	0.350493	0.731385	A0A8I6XKQ4;A0A8I7B5T8;F2CWH1;F2DNJ1;F2E0W3;F2E2B0
GO:1990204	oxidoreductase complex	5	64	0.35128	0.731385	A0A8I6XKQ4;F2CWH1;F2DNJ1;F2E0W3;F2E2T3
GO:0019866	organelle inner membrane	8	110	0.355499	0.731385	A0A8I6X3I3;A0A8I6XKQ4;A0A8I7B5T8;F2CWH1;F2DNJ1;F2E0W3;F2E2B0;F2EBY7
GO:0000015	phosphopyruvate hydratase complex	1	7	0.356626	0.731385	A0A8I6YC32
GO:0000974	Prp19 complex	1	7	0.356626	0.731385	F2D0F3
GO:0005758	mitochondrial intermembrane space	1	7	0.356626	0.731385	F2CXT5
GO:0031970	organelle envelope lumen	1	7	0.356626	0.731385	F2CXT5
GO:0000323	lytic vacuole	2	21	0.36979	0.745743	A0A8I6WYU4;F2CQ37
GO:0005764	lysosome	2	21	0.36979	0.745743	A0A8I6WYU4;F2CQ37
GO:0098798	mitochondrial protein complex	6	82	0.384069	0.760073	A0A8I6XKQ4;A0A8I7B5T8;F2CWH1;F2DNJ1;F2E0W3;F2E2B0
GO:0031966	mitochondrial membrane	9	129	0.387719	0.760073	A0A8I6WRY7;A0A8I6X3I3;A0A8I6XKQ4;A0A8I7B5T8;F2CWH1;F2D8E6;F2DNJ1;F2E0W3;F2E2B0
GO:0009528	plastid inner membrane	1	8	0.395968	0.760073	F2EBY7
GO:0009706	chloroplast inner membrane	1	8	0.395968	0.760073	F2EBY7
GO:0031902	late endosome membrane	1	8	0.395968	0.760073	F2EEJ9
GO:0005802	trans-Golgi network	2	23	0.414013	0.760073	A0A287LRJ1;M0WWJ8
GO:0005874	microtubule	2	23	0.414013	0.760073	A0A8I6X0W8;A0A8I6X7E0
GO:0009535	chloroplast thylakoid membrane	2	23	0.414013	0.760073	A0A8I6XD40;F2ECM5
GO:0055035	plastid thylakoid membrane	2	23	0.414013	0.760073	A0A8I6XD40;F2ECM5
GO:0009707	chloroplast outer membrane	1	9	0.432918	0.760073	F2DXG7
GO:0030131	clathrin adaptor complex	1	9	0.432918	0.760073	F2DKP3
GO:0045239	tricarboxylic acid cycle enzyme complex	1	9	0.432918	0.760073	F2E2T3
GO:0045261	proton-transporting ATP synthase complex, catalytic core F(1)	1	9	0.432918	0.760073	A0A8I7B5T8
GO:0070069	cytochrome complex	1	9	0.432918	0.760073	F2E2B0
GO:0043234	protein complex	38	602	0.434008	0.760073	A0A8I6W8C2;A0A8I6WKT1;A0A8I6WUP0;A0A8I6X313;A0A8I6XAI2;A0A8I6XEP7;A0A8I6XKQ4;A0A8I6XLD0;A0A8I6XQU3;A0A8I6Y8G3;A0A8I6YC32;A0A8I6YEZ5;A0A8I6YL06;A0A8I6YLU5;A0A8I7B2H8;A0A8I7B4D8;A0A8I7B5C4;A0A8I7B5T8;A0A8I7B601;F2CQ37;F2CWH1;F2D0F3;F2D2Z9;F2D4G9;F2D894;F2DKP3;F2DNJ1;F2DP42;F2DV56;F2DXD4;F2E0W3;F2E2B0;F2E2T3;F2E3Y1;F2EEJ9;F2EJZ7;F2ELG2;M0WWJ8
GO:0016469	proton-transporting two-sector ATPase complex	2	24	0.435549	0.760073	A0A8I7B5T8;F2CQ37
GO:0099512	supramolecular fiber	2	24	0.435549	0.760073	A0A8I6X0W8;A0A8I6X7E0
GO:0099513	polymeric cytoskeletal fiber	2	24	0.435549	0.760073	A0A8I6X0W8;A0A8I6X7E0
GO:0009536	plastid	14	215	0.439998	0.760073	A0A287WWM4;A0A8I6X0W8;A0A8I6X6P0;A0A8I6XD40;A0A8I6XGQ8;A0A8I6Y9I1;F2CS15;F2CW53;F2DC91;F2DXG7;F2E0W3;F2EBY7;F2ECM5;F2EGN2
GO:0005743	mitochondrial inner membrane	7	103	0.441025	0.760073	A0A8I6X3I3;A0A8I6XKQ4;A0A8I7B5T8;F2CWH1;F2DNJ1;F2E0W3;F2E2B0
GO:0005770	late endosome	1	10	0.46762	0.760073	F2EEJ9
GO:0005791	rough endoplasmic reticulum	1	10	0.46762	0.760073	F2D4G9
GO:0019773	proteasome core complex, alpha-subunit complex	1	10	0.46762	0.760073	F2D894
GO:0030119	AP-type membrane coat adaptor complex	1	10	0.46762	0.760073	F2DKP3
GO:0030867	rough endoplasmic reticulum membrane	1	10	0.46762	0.760073	F2D4G9
GO:0032040	small-subunit processome	1	10	0.46762	0.760073	F2EG94
GO:0033176	proton-transporting V-type ATPase complex	1	10	0.46762	0.760073	F2CQ37
GO:0045273	respiratory chain complex II	1	10	0.46762	0.760073	F2CWH1
GO:0034357	photosynthetic membrane	2	26	0.477304	0.760073	A0A8I6XD40;F2ECM5
GO:0042651	thylakoid membrane	2	26	0.477304	0.760073	A0A8I6XD40;F2ECM5
GO:0044436	thylakoid part	2	26	0.477304	0.760073	A0A8I6XD40;F2ECM5
GO:0005759	mitochondrial matrix	3	42	0.477401	0.760073	F2CW53;F2EGN2;F2EIG1
GO:0005634	nucleus	39	629	0.483767	0.765174	A0A287H6P9;A0A287VZP8;A0A8I6WDS1;A0A8I6WKT1;A0A8I6WXW1;A0A8I6X313;A0A8I6X3I3;A0A8I6X6U3;A0A8I6X7E0;A0A8I6XBH2;A0A8I6XJ52;A0A8I6XLD0;A0A8I6XLR3;A0A8I6XQU3;A0A8I6Y1U6;A0A8I6Y2P0;A0A8I6YEZ5;A0A8I6YL06;A0A8I6YSZ9;A0A8I6Z0S4;A0A8I7B0Y3;A0A8I7B2H8;A0A8I7B2U1;A0A8I7B903;A0A8I7BEI9;F2CQH9;F2CTA6;F2CXT6;F2D0F3;F2D3D5;F2D5L5;F2D894;F2DGN5;F2DH88;F2DVU1;F2E1R5;F2E3Y1;F2EJZ7;F2ELG2
GO:0005753	mitochondrial proton-transporting ATP synthase complex	1	11	0.500211	0.778731	A0A8I7B5T8
GO:0009527	plastid outer membrane	1	11	0.500211	0.778731	F2DXG7
GO:0043231	intracellular membrane-bounded organelle	99	1615	0.501992	0.778731	A0A287H6P9;A0A287LRJ1;A0A287VZP8;A0A287WWM4;A0A8I6WAU3;A0A8I6WDS1;A0A8I6WHE5;A0A8I6WKT1;A0A8I6WRY7;A0A8I6WSL2;A0A8I6WTG0;A0A8I6WUP0;A0A8I6WXW1;A0A8I6WYU4;A0A8I6X0W8;A0A8I6X313;A0A8I6X3I3;A0A8I6X6P0;A0A8I6X6U3;A0A8I6X7E0;A0A8I6XAI2;A0A8I6XBH2;A0A8I6XD40;A0A8I6XEP7;A0A8I6XGQ8;A0A8I6XJ52;A0A8I6XKQ4;A0A8I6XLD0;A0A8I6XLR3;A0A8I6XQU3;A0A8I6XTS4;A0A8I6Y1U6;A0A8I6Y2P0;A0A8I6Y4H4;A0A8I6Y8G3;A0A8I6Y9I1;A0A…
GO:0005838	proteasome regulatory particle	2	28	0.517141	0.787095	A0A8I7B601;F2E3Y1
GO:0015630	microtubule cytoskeleton	2	28	0.517141	0.787095	A0A8I6X0W8;A0A8I6X7E0
GO:0022624	proteasome accessory complex	2	28	0.517141	0.787095	A0A8I7B601;F2E3Y1
GO:0043227	membrane-bounded organelle	99	1620	0.52177	0.789177	A0A287H6P9;A0A287LRJ1;A0A287VZP8;A0A287WWM4;A0A8I6WAU3;A0A8I6WDS1;A0A8I6WHE5;A0A8I6WKT1;A0A8I6WRY7;A0A8I6WSL2;A0A8I6WTG0;A0A8I6WUP0;A0A8I6WXW1;A0A8I6WYU4;A0A8I6X0W8;A0A8I6X313;A0A8I6X3I3;A0A8I6X6P0;A0A8I6X6U3;A0A8I6X7E0;A0A8I6XAI2;A0A8I6XBH2;A0A8I6XD40;A0A8I6XEP7;A0A8I6XGQ8;A0A8I6XJ52;A0A8I6XKQ4;A0A8I6XLD0;A0A8I6XLR3;A0A8I6XQU3;A0A8I6XTS4;A0A8I6Y1U6;A0A8I6Y2P0;A0A8I6Y4H4;A0A8I6Y8G3;A0A8I6Y9I1;A0A…
GO:0015629	actin cytoskeleton	1	12	0.530818	0.797875	A0A287MLU2
GO:0031968	organelle outer membrane	2	29	0.536297	0.801135	F2D8E6;F2DXG7
GO:0098805	whole membrane	9	147	0.547322	0.807129	A0A287LRJ1;A0A8I6XAI2;A0A8I6YLU5;F2CQ37;F2D2Z9;F2D8E6;F2DP42;F2DXG7;F2EEJ9
GO:0009534	chloroplast thylakoid	2	30	0.554928	0.807129	A0A8I6XD40;F2ECM5
GO:0030658	transport vesicle membrane	2	30	0.554928	0.807129	A0A287LRJ1;F2EEJ9
GO:0031976	plastid thylakoid	2	30	0.554928	0.807129	A0A8I6XD40;F2ECM5
GO:0045259	proton-transporting ATP synthase complex	1	13	0.559561	0.807129	A0A8I7B5T8
GO:0005840	ribosome	7	115	0.560321	0.807129	F2CS15;F2CUI5;F2DVU2;F2EAX5;F2ECK7;F2EG94;F2EIG1
GO:0044444	cytoplasmic part	93	1535	0.572871	0.820324	A0A067YHQ4;A0A287LRJ1;A0A287WWM4;A0A8I6W8C2;A0A8I6WAU3;A0A8I6WDR8;A0A8I6WHE5;A0A8I6WRY7;A0A8I6WSL2;A0A8I6WTG0;A0A8I6WUP0;A0A8I6WXW1;A0A8I6WYU4;A0A8I6X0W8;A0A8I6X3I3;A0A8I6X6P0;A0A8I6XAI2;A0A8I6XD40;A0A8I6XEP7;A0A8I6XGQ8;A0A8I6XKQ4;A0A8I6XKT3;A0A8I6XLR3;A0A8I6XPB3;A0A8I6XSQ9;A0A8I6XTS4;A0A8I6Y2P0;A0A8I6Y4H4;A0A8I6Y5P8;A0A8I6Y8G3;A0A8I6Y9I1;A0A8I6YC32;A0A8I6YDV3;A0A8I6YGE1;A0A8I6YLU5;A0A8I6Z597;A0A…
GO:0005886	plasma membrane	7	117	0.579172	0.824468	A0A287LRJ1;A0A8I6WVD2;A0A8I6XJ52;A0A8I6YDV3;A0A8I6YE02;F2D2Z9;M0W534
GO:0044430	cytoskeletal part	2	33	0.607614	0.859499	A0A8I6X0W8;A0A8I6X7E0
GO:0000502	proteasome complex	3	51	0.610883	0.859499	A0A8I7B601;F2D894;F2E3Y1
GO:0000139	Golgi membrane	4	72	0.649929	0.904822	A0A287LRJ1;A0A8I6XLR3;A0A8I6Y8G3;F2DLT2
GO:0009579	thylakoid	2	36	0.655462	0.904822	A0A8I6XD40;F2ECM5
GO:0005839	proteasome core complex	1	17	0.658052	0.904822	F2D894
GO:0044459	plasma membrane part	1	17	0.658052	0.904822	F2D2Z9
GO:1902494	catalytic complex	8	146	0.678278	0.923188	A0A8I6XKQ4;A0A8I6YC32;F2CWH1;F2DNJ1;F2DV56;F2E0W3;F2E2T3;F2ELG2
GO:0030118	clathrin coat	1	18	0.679039	0.923188	F2DKP3
GO:0005856	cytoskeleton	3	57	0.686335	0.925929	A0A287MLU2;A0A8I6X0W8;A0A8I6X7E0
GO:0015934	large ribosomal subunit	3	58	0.697796	0.925929	F2CUI5;F2DVU2;F2EIG1
GO:0005741	mitochondrial outer membrane	1	19	0.698745	0.925929	F2D8E6
GO:0030684	preribosome	1	19	0.698745	0.925929	F2EG94
GO:1990234	transferase complex	3	59	0.70894	0.925929	F2DV56;F2E2T3;F2ELG2
GO:0005737	cytoplasm	116	1948	0.722853	0.925929	A0A067YHQ4;A0A287LRJ1;A0A287MLU2;A0A287VZP8;A0A287WWM4;A0A8I6W8C2;A0A8I6WAU3;A0A8I6WDR8;A0A8I6WE67;A0A8I6WHE5;A0A8I6WII2;A0A8I6WIX1;A0A8I6WRY7;A0A8I6WSL2;A0A8I6WTG0;A0A8I6WUP0;A0A8I6WXW1;A0A8I6WYU4;A0A8I6X0W8;A0A8I6X3I3;A0A8I6X6D5;A0A8I6X6P0;A0A8I6X7E0;A0A8I6XAI2;A0A8I6XBA4;A0A8I6XD40;A0A8I6XEP7;A0A8I6XGQ8;A0A8I6XK58;A0A8I6XKQ4;A0A8I6XKT3;A0A8I6XLR3;A0A8I6XPB3;A0A8I6XSQ9;A0A8I6XTS4;A0A8I6XZU9;A0A…
GO:0005739	mitochondrion	19	345	0.724055	0.925929	A0A8I6WHE5;A0A8I6WRY7;A0A8I6WSL2;A0A8I6X3I3;A0A8I6XKQ4;A0A8I7B5T8;F2CW53;F2CWH1;F2CXT5;F2D8E6;F2DMU4;F2DNJ1;F2DS63;F2E0W3;F2E2B0;F2E2T3;F2E8P3;F2EGN2;F2EIG1
GO:0030133	transport vesicle	2	41	0.72477	0.925929	A0A287LRJ1;F2EEJ9
GO:0044431	Golgi apparatus part	5	98	0.725103	0.925929	A0A287LRJ1;A0A8I6XLR3;A0A8I6Y8G3;F2DLT2;M0WWJ8
GO:0032991	macromolecular complex	48	836	0.72533	0.925929	A0A8I6W8C2;A0A8I6WDS1;A0A8I6WKT1;A0A8I6WUP0;A0A8I6X313;A0A8I6XAI2;A0A8I6XD40;A0A8I6XEP7;A0A8I6XKQ4;A0A8I6XLD0;A0A8I6XQU3;A0A8I6Y8G3;A0A8I6YC32;A0A8I6YEZ5;A0A8I6YL06;A0A8I6YLU5;A0A8I6YSZ9;A0A8I7B2H8;A0A8I7B4D8;A0A8I7B5C4;A0A8I7B5T8;A0A8I7B601;F2CQ37;F2CS15;F2CUI5;F2CWH1;F2D0F3;F2D2Z9;F2D4G9;F2D894;F2DKP3;F2DNJ1;F2DP42;F2DV56;F2DVU2;F2DXD4;F2E0W3;F2E2B0;F2E2T3;F2E3Y1;F2EAX5;F2ECK7;F2EEJ9;F2EG94;F2E…
GO:0005643	nuclear pore	1	21	0.734621	0.925929	A0A8I6YEZ5
GO:0005774	vacuolar membrane	1	21	0.734621	0.925929	F2CQ37
GO:0012507	ER to Golgi transport vesicle membrane	1	21	0.734621	0.925929	F2EEJ9
GO:0044437	vacuolar part	1	21	0.734621	0.925929	F2CQ37
GO:0005773	vacuole	3	64	0.759991	0.952204	A0A8I6WYU4;F2CQ37;P80198
GO:0071944	cell periphery	7	140	0.763337	0.952204	A0A287LRJ1;A0A8I6WVD2;A0A8I6XJ52;A0A8I6YDV3;A0A8I6YE02;F2D2Z9;M0W534
GO:0043229	intracellular organelle	105	1785	0.769274	0.953367	A0A287H6P9;A0A287LRJ1;A0A287MLU2;A0A287VZP8;A0A287WWM4;A0A8I6WAU3;A0A8I6WDS1;A0A8I6WHE5;A0A8I6WKT1;A0A8I6WRY7;A0A8I6WSL2;A0A8I6WTG0;A0A8I6WUP0;A0A8I6WXW1;A0A8I6WYU4;A0A8I6X0W8;A0A8I6X313;A0A8I6X3I3;A0A8I6X6P0;A0A8I6X6U3;A0A8I6X7E0;A0A8I6XAI2;A0A8I6XBH2;A0A8I6XD40;A0A8I6XEP7;A0A8I6XGQ8;A0A8I6XJ52;A0A8I6XKQ4;A0A8I6XLD0;A0A8I6XLR3;A0A8I6XQU3;A0A8I6XTS4;A0A8I6Y1U6;A0A8I6Y2P0;A0A8I6Y4H4;A0A8I6Y8G3;A0A…
GO:0031974	membrane-enclosed lumen	9	178	0.772149	0.953367	A0A8I6Y4H4;F2CPT7;F2CTA6;F2CW53;F2CXT5;F2D3D5;F2EGN2;F2EIG1;F2EJZ7
GO:0005654	nucleoplasm	3	66	0.778298	0.955474	F2CTA6;F2D3D5;F2EJZ7
GO:0043226	organelle	105	1790	0.784658	0.955474	A0A287H6P9;A0A287LRJ1;A0A287MLU2;A0A287VZP8;A0A287WWM4;A0A8I6WAU3;A0A8I6WDS1;A0A8I6WHE5;A0A8I6WKT1;A0A8I6WRY7;A0A8I6WSL2;A0A8I6WTG0;A0A8I6WUP0;A0A8I6WXW1;A0A8I6WYU4;A0A8I6X0W8;A0A8I6X313;A0A8I6X3I3;A0A8I6X6P0;A0A8I6X6U3;A0A8I6X7E0;A0A8I6XAI2;A0A8I6XBH2;A0A8I6XD40;A0A8I6XEP7;A0A8I6XGQ8;A0A8I6XJ52;A0A8I6XKQ4;A0A8I6XLD0;A0A8I6XLR3;A0A8I6XQU3;A0A8I6XTS4;A0A8I6Y1U6;A0A8I6Y2P0;A0A8I6Y4H4;A0A8I6Y8G3;A0A…
GO:0005681	spliceosomal complex	3	69	0.803607	0.955474	A0A8I6WDS1;A0A8I6YSZ9;F2D0F3
GO:0043233	organelle lumen	8	171	0.833016	0.955474	A0A8I6Y4H4;F2CPT7;F2CTA6;F2CW53;F2D3D5;F2EGN2;F2EIG1;F2EJZ7
GO:0070013	intracellular organelle lumen	8	171	0.833016	0.955474	A0A8I6Y4H4;F2CPT7;F2CTA6;F2CW53;F2D3D5;F2EGN2;F2EIG1;F2EJZ7
GO:0005622	intracellular	140	2356	0.834074	0.955474	A0A067YHQ4;A0A287H6P9;A0A287LRJ1;A0A287MLU2;A0A287VZP8;A0A287WWM4;A0A8I6W8C2;A0A8I6WAU3;A0A8I6WDR8;A0A8I6WDS1;A0A8I6WE67;A0A8I6WHE5;A0A8I6WII2;A0A8I6WIX1;A0A8I6WKT1;A0A8I6WRY7;A0A8I6WSL2;A0A8I6WTG0;A0A8I6WUP0;A0A8I6WXW1;A0A8I6WYU4;A0A8I6X0W8;A0A8I6X313;A0A8I6X3I3;A0A8I6X6D5;A0A8I6X6P0;A0A8I6X6U3;A0A8I6X7E0;A0A8I6XAI2;A0A8I6XBA4;A0A8I6XBH2;A0A8I6XD40;A0A8I6XEP7;A0A8I6XGQ8;A0A8I6XJ52;A0A8I6XK58;A0A…
GO:0044424	intracellular part	140	2356	0.834074	0.955474	A0A067YHQ4;A0A287H6P9;A0A287LRJ1;A0A287MLU2;A0A287VZP8;A0A287WWM4;A0A8I6W8C2;A0A8I6WAU3;A0A8I6WDR8;A0A8I6WDS1;A0A8I6WE67;A0A8I6WHE5;A0A8I6WII2;A0A8I6WIX1;A0A8I6WKT1;A0A8I6WRY7;A0A8I6WSL2;A0A8I6WTG0;A0A8I6WUP0;A0A8I6WXW1;A0A8I6WYU4;A0A8I6X0W8;A0A8I6X313;A0A8I6X3I3;A0A8I6X6D5;A0A8I6X6P0;A0A8I6X6U3;A0A8I6X7E0;A0A8I6XAI2;A0A8I6XBA4;A0A8I6XBH2;A0A8I6XD40;A0A8I6XEP7;A0A8I6XGQ8;A0A8I6XJ52;A0A8I6XK58;A0A…
GO:0044391	ribosomal subunit	4	94	0.836774	0.955474	F2CUI5;F2DVU2;F2EG94;F2EIG1
GO:0005911	cell-cell junction	1	29	0.840347	0.955474	A0A8I7B2D2
GO:0009506	plasmodesma	1	29	0.840347	0.955474	A0A8I7B2D2
GO:0030054	cell junction	1	29	0.840347	0.955474	A0A8I7B2D2
GO:0055044	symplast	1	29	0.840347	0.955474	A0A8I7B2D2
GO:0043228	non-membrane-bounded organelle	15	302	0.841449	0.955474	A0A287MLU2;A0A8I6WKT1;A0A8I6X0W8;A0A8I6X313;A0A8I6X7E0;A0A8I6XLD0;A0A8I6XQU3;A0A8I6YL06;F2CS15;F2CUI5;F2DVU2;F2EAX5;F2ECK7;F2EG94;F2EIG1
GO:0043232	intracellular non-membrane-bounded organelle	15	302	0.841449	0.955474	A0A287MLU2;A0A8I6WKT1;A0A8I6X0W8;A0A8I6X313;A0A8I6X7E0;A0A8I6XLD0;A0A8I6XQU3;A0A8I6YL06;F2CS15;F2CUI5;F2DVU2;F2EAX5;F2ECK7;F2EG94;F2EIG1
GO:0044445	cytosolic part	5	115	0.842554	0.955474	A0A8I6YC32;A0A8I7B4D8;F2CUI5;F2DVU2;F2EG94
GO:0005794	Golgi apparatus	7	154	0.842764	0.955474	A0A287LRJ1;A0A8I6XLR3;A0A8I6Y8G3;F2DLT2;F2E376;F2EEJ9;M0WWJ8
GO:0030529	intracellular ribonucleoprotein complex	12	248	0.844056	0.955474	A0A8I6W8C2;A0A8I6WDS1;A0A8I6YSZ9;F2CS15;F2CUI5;F2D0F3;F2DVU2;F2DXD4;F2EAX5;F2ECK7;F2EG94;F2EIG1
GO:0071013	catalytic step 2 spliceosome	1	30	0.850189	0.955474	F2D0F3
GO:0022625	cytosolic large ribosomal subunit	2	54	0.852034	0.955474	F2CUI5;F2DVU2
GO:1990904	ribonucleoprotein complex	13	270	0.857463	0.955474	A0A8I6W8C2;A0A8I6WDS1;A0A8I6XD40;A0A8I6YSZ9;F2CS15;F2CUI5;F2D0F3;F2DVU2;F2DXD4;F2EAX5;F2ECK7;F2EG94;F2EIG1
GO:0009570	chloroplast stroma	1	31	0.859428	0.955474	F2EGN2
GO:0009532	plastid stroma	1	32	0.8681	0.955474	F2EGN2
GO:0030134	ER to Golgi transport vesicle	1	32	0.8681	0.955474	F2EEJ9
GO:0005777	peroxisome	2	57	0.872561	0.955474	F2CXD7;F2CXT5
GO:0042579	microbody	2	57	0.872561	0.955474	F2CXD7;F2CXT5
GO:0005829	cytosol	28	547	0.880743	0.959189	A0A067YHQ4;A0A8I6WDR8;A0A8I6WHE5;A0A8I6WXW1;A0A8I6XKT3;A0A8I6XPB3;A0A8I6XSQ9;A0A8I6Y2P0;A0A8I6Y5P8;A0A8I6YC32;A0A8I7B0Y3;A0A8I7B2U1;A0A8I7B3E2;A0A8I7B4D8;A0A8I7B647;A0A8I7BFL1;A3RHH8;F2CUI5;F2CXD7;F2DG56;F2DGM5;F2DH88;F2DVU2;F2E3Y1;F2EG94;Q5EXM3;Q9SBI7;T1TD43
GO:0022627	cytosolic small ribosomal subunit	1	34	0.883881	0.959189	F2EG94
GO:0044428	nuclear part	10	226	0.897652	0.960602	A0A8I6WDS1;A0A8I6X6U3;A0A8I6YEZ5;A0A8I6YSZ9;A0A8I7B2H8;F2CTA6;F2D0F3;F2D3D5;F2E1R5;F2EJZ7
GO:0015935	small ribosomal subunit	1	36	0.897783	0.960602	F2EG94
GO:0012506	vesicle membrane	2	62	0.901061	0.960602	A0A287LRJ1;F2EEJ9
GO:0030659	cytoplasmic vesicle membrane	2	62	0.901061	0.960602	A0A287LRJ1;F2EEJ9
GO:0022626	cytosolic ribosome	3	88	0.913569	0.967155	F2CUI5;F2DVU2;F2EG94
GO:0044433	cytoplasmic vesicle part	2	65	0.9152	0.967155	A0A287LRJ1;F2EEJ9
GO:0005623	cell	142	2422	0.936068	0.974943	A0A067YHQ4;A0A287H6P9;A0A287LRJ1;A0A287MLU2;A0A287VZP8;A0A287WWM4;A0A8I6W8C2;A0A8I6WAU3;A0A8I6WDR8;A0A8I6WDS1;A0A8I6WE67;A0A8I6WHE5;A0A8I6WII2;A0A8I6WIX1;A0A8I6WKT1;A0A8I6WRY7;A0A8I6WSL2;A0A8I6WTG0;A0A8I6WUP0;A0A8I6WVD2;A0A8I6WXW1;A0A8I6WYU4;A0A8I6X0W8;A0A8I6X313;A0A8I6X3I3;A0A8I6X6D5;A0A8I6X6P0;A0A8I6X6U3;A0A8I6X7E0;A0A8I6XAI2;A0A8I6XBA4;A0A8I6XBH2;A0A8I6XD40;A0A8I6XEP7;A0A8I6XGQ8;A0A8I6XJ52;A0A…
GO:0044464	cell part	142	2422	0.936068	0.974943	A0A067YHQ4;A0A287H6P9;A0A287LRJ1;A0A287MLU2;A0A287VZP8;A0A287WWM4;A0A8I6W8C2;A0A8I6WAU3;A0A8I6WDR8;A0A8I6WDS1;A0A8I6WE67;A0A8I6WHE5;A0A8I6WII2;A0A8I6WIX1;A0A8I6WKT1;A0A8I6WRY7;A0A8I6WSL2;A0A8I6WTG0;A0A8I6WUP0;A0A8I6WVD2;A0A8I6WXW1;A0A8I6WYU4;A0A8I6X0W8;A0A8I6X313;A0A8I6X3I3;A0A8I6X6D5;A0A8I6X6P0;A0A8I6X6U3;A0A8I6X7E0;A0A8I6XAI2;A0A8I6XBA4;A0A8I6XBH2;A0A8I6XD40;A0A8I6XEP7;A0A8I6XGQ8;A0A8I6XJ52;A0A…
GO:0030117	membrane coat	1	44	0.938685	0.974943	F2DKP3
GO:0048475	coated membrane	1	44	0.938685	0.974943	F2DKP3
GO:0044451	nucleoplasm part	1	50	0.958251	0.98472	F2EJZ7
GO:0016023	cytoplasmic, membrane-bounded vesicle	2	82	0.965582	0.98472	A0A287LRJ1;F2EEJ9
GO:0031981	nuclear lumen	3	109	0.967935	0.98472	F2CTA6;F2D3D5;F2EJZ7
GO:0031988	membrane-bounded vesicle	2	84	0.96913	0.98472	A0A287LRJ1;F2EEJ9
GO:0031410	cytoplasmic vesicle	2	85	0.97077	0.98472	A0A287LRJ1;F2EEJ9
GO:0031982	vesicle	2	89	0.976533	0.98472	A0A287LRJ1;F2EEJ9
GO:0030662	coated vesicle membrane	1	59	0.976582	0.98472	F2EEJ9
GO:0030135	coated vesicle	1	73	0.990511	0.994621	F2EEJ9
GO:0005575	cellular_component	167	2738	1	1	A0A067YHQ4;A0A142I888;A0A287DTW3;A0A287H6P9;A0A287LRJ1;A0A287MLU2;A0A287VZP8;A0A287WWM4;A0A8I6W6U7;A0A8I6W8C2;A0A8I6WAU3;A0A8I6WDR8;A0A8I6WDS1;A0A8I6WE67;A0A8I6WHB0;A0A8I6WHE5;A0A8I6WII2;A0A8I6WIX1;A0A8I6WKT1;A0A8I6WRY7;A0A8I6WSL2;A0A8I6WTG0;A0A8I6WUP0;A0A8I6WVD2;A0A8I6WXW1;A0A8I6WYU4;A0A8I6X0W8;A0A8I6X313;A0A8I6X3E1;A0A8I6X3I3;A0A8I6X6D5;A0A8I6X6P0;A0A8I6X6U3;A0A8I6X7E0;A0A8I6XAI2;A0A8I6XBA4;A0A…

## Sheet: MF
GO ID	Description	out (171)	All (2874)	pvalue	p.adjust	Genes
GO:0015035	protein disulfide oxidoreductase activity	4	8	0.00070164	0.147521	A0A8I6XK58;F2CPT7;F2CXT5;Q7XZK3
GO:0004866	endopeptidase inhibitor activity	9	47	0.00144627	0.147521	A0A287DTW3;A0A8I6WHB0;A0A8I6WLJ4;A0A8I6WML8;A0A8I6X488;A8V3Y1;A8V400;F2E5X4;M0XBS5
GO:0030414	peptidase inhibitor activity	9	47	0.00144627	0.147521	A0A287DTW3;A0A8I6WHB0;A0A8I6WLJ4;A0A8I6WML8;A0A8I6X488;A8V3Y1;A8V400;F2E5X4;M0XBS5
GO:0061135	endopeptidase regulator activity	9	48	0.00169058	0.147521	A0A287DTW3;A0A8I6WHB0;A0A8I6WLJ4;A0A8I6WML8;A0A8I6X488;A8V3Y1;A8V400;F2E5X4;M0XBS5
GO:0061134	peptidase regulator activity	9	49	0.00196695	0.147521	A0A287DTW3;A0A8I6WHB0;A0A8I6WLJ4;A0A8I6WML8;A0A8I6X488;A8V3Y1;A8V400;F2E5X4;M0XBS5
GO:0050178	phenylpyruvate tautomerase activity	2	2	0.00352065	0.220041	F2CZW3;F2DAC4
GO:0004364	glutathione transferase activity	6	28	0.005107	0.227403	A0A8I6WE67;A0A8I6WII2;A0A8I6XBA4;A0A8I6XR17;A0A8I6Y1V9;A0A8I6Y5P8
GO:0004867	serine-type endopeptidase inhibitor activity	7	37	0.00525396	0.227403	A0A287DTW3;A0A8I6WHB0;A0A8I6WLJ4;A0A8I6WML8;A8V3Y1;A8V400;M0XBS5
GO:0004857	enzyme inhibitor activity	10	67	0.00548678	0.227403	A0A287DTW3;A0A8I6WHB0;A0A8I6WLJ4;A0A8I6WML8;A0A8I6X488;A8V3Y1;A8V400;F2E5X4;M0XBS5;Q7XZK3
GO:0051920	peroxiredoxin activity	3	7	0.00606409	0.227403	A0A7S9YWD1;A0A8I6WHE5;F2E5J1
GO:0016862	intramolecular oxidoreductase activity, interconverting keto- and enol-groups	2	3	0.0101476	0.345941	F2CZW3;F2DAC4
GO:0016667	oxidoreductase activity, acting on a sulfur group of donors	6	33	0.011727	0.361318	A0A8I6XK58;F2CPT7;F2CXT5;F2CZC9;F2E2T3;Q7XZK3
GO:0015036	disulfide oxidoreductase activity	4	16	0.0125257	0.361318	A0A8I6XK58;F2CPT7;F2CXT5;Q7XZK3
GO:0008289	lipid binding	8	63	0.0311716	0.421159	A0A287MLU2;A0A8I6XQT6;A0A8I6YM43;A0A8I6Z597;A0A8I7B5C4;F2D9V7;F2DGM5;Q5UNP2
GO:0005319	lipid transporter activity	2	5	0.0312421	0.421159	F2DGM5;F2EBY7
GO:0098772	molecular function regulator	14	138	0.0323786	0.421159	A0A287DTW3;A0A8I6WHB0;A0A8I6WLJ4;A0A8I6WML8;A0A8I6X488;A0A8I6XBH2;A8V3Y1;A8V400;F2E2B0;F2E5X4;F2EGN2;M0WNW4;M0XBS5;Q7XZK3
GO:0016765	transferase activity, transferring alkyl or aryl (other than methyl) groups	6	42	0.0357354	0.421159	A0A8I6WE67;A0A8I6WII2;A0A8I6XBA4;A0A8I6XR17;A0A8I6Y1V9;A0A8I6Y5P8
GO:0030234	enzyme regulator activity	13	127	0.0361857	0.421159	A0A287DTW3;A0A8I6WHB0;A0A8I6WLJ4;A0A8I6WML8;A0A8I6X488;A8V3Y1;A8V400;F2E2B0;F2E5X4;F2EGN2;M0WNW4;M0XBS5;Q7XZK3
GO:0004017	adenylate kinase activity	2	6	0.0450518	0.421159	A0A287VZP8;F2E8P3
GO:0008379	thioredoxin peroxidase activity	2	6	0.0450518	0.421159	A0A7S9YWD1;F2E5J1
GO:1901981	phosphatidylinositol phosphate binding	2	6	0.0450518	0.421159	A0A287MLU2;A0A8I7B5C4
GO:0030527	structural constituent of chromatin	5	35	0.0535256	0.421159	A0A8I6WKT1;A0A8I6X313;A0A8I6XLD0;A0A8I6XQU3;A0A8I6YL06
GO:0000993	RNA polymerase II core binding	1	1	0.059499	0.421159	F2EJZ7
GO:0003941	L-serine ammonia-lyase activity	1	1	0.059499	0.421159	A0A8I6XC32
GO:0003998	acylphosphatase activity	1	1	0.059499	0.421159	F2E0R2
GO:0004163	diphosphomevalonate decarboxylase activity	1	1	0.059499	0.421159	A0A8I7BFL1
GO:0004358	glutamate N-acetyltransferase activity	1	1	0.059499	0.421159	F2CW53
GO:0004392	heme oxygenase (decyclizing) activity	1	1	0.059499	0.421159	F2DC91
GO:0004419	hydroxymethylglutaryl-CoA lyase activity	1	1	0.059499	0.421159	A0A8I6WR80
GO:0004523	RNA-DNA hybrid ribonuclease activity	1	1	0.059499	0.421159	A0A8I6Y3I8
GO:0004573	mannosyl-oligosaccharide glucosidase activity	1	1	0.059499	0.421159	A0A8I6XTS4
GO:0004733	pyridoxamine-phosphate oxidase activity	1	1	0.059499	0.421159	A0A8I6YBQ4
GO:0004794	L-threonine ammonia-lyase activity	1	1	0.059499	0.421159	A0A8I6XC32
GO:0004853	uroporphyrinogen decarboxylase activity	1	1	0.059499	0.421159	F2DG56
GO:0005125	cytokine activity	1	1	0.059499	0.421159	F2CZW3
GO:0008176	tRNA (guanine-N7-)-methyltransferase activity	1	1	0.059499	0.421159	F2ELG2
GO:0008696	4-amino-4-deoxychorismate lyase activity	1	1	0.059499	0.421159	F2DYM4
GO:0008837	diaminopimelate epimerase activity	1	1	0.059499	0.421159	A0A8I6XPB3
GO:0016423	tRNA (guanine) methyltransferase activity	1	1	0.059499	0.421159	F2ELG2
GO:0016855	racemase and epimerase activity, acting on amino acids and derivatives	1	1	0.059499	0.421159	A0A8I6XPB3
GO:0017080	sodium channel regulator activity	1	1	0.059499	0.421159	A0A8I6XBH2
GO:0036361	racemase activity, acting on amino acids and derivatives	1	1	0.059499	0.421159	A0A8I6XPB3
GO:0036374	glutathione hydrolase activity	1	1	0.059499	0.421159	A0A8I6WVD2
GO:0043175	RNA polymerase core enzyme binding	1	1	0.059499	0.421159	F2EJZ7
GO:0045544	gibberellin 20-oxidase activity	1	1	0.059499	0.421159	Q673G6
GO:0047661	amino-acid racemase activity	1	1	0.059499	0.421159	A0A8I6XPB3
GO:0061463	O-acetyl-ADP-ribose deacetylase activity	1	1	0.059499	0.421159	F2EBB9
GO:0098808	mRNA cap binding	1	1	0.059499	0.421159	A0A8I6W8C2
GO:0005244	voltage-gated ion channel activity	2	7	0.0606468	0.421159	F2D8E6;F2DXG7
GO:0016671	oxidoreductase activity, acting on a sulfur group of donors, disulfide as acceptor	2	7	0.0606468	0.421159	F2CZC9;Q7XZK3
GO:0016833	oxo-acid-lyase activity	2	7	0.0606468	0.421159	A0A8I6WR80;F2DYM4
GO:0019201	nucleotide kinase activity	2	7	0.0606468	0.421159	A0A287VZP8;F2E8P3
GO:0022832	voltage-gated channel activity	2	7	0.0606468	0.421159	F2D8E6;F2DXG7
GO:0022836	gated channel activity	2	7	0.0606468	0.421159	F2D8E6;F2DXG7
GO:0031593	polyubiquitin binding	3	16	0.0654122	0.445992	A0A8I6XEP7;A0A8I6Y2P0;A0A8I7BBJ7
GO:0004869	cysteine-type endopeptidase inhibitor activity	2	8	0.0777686	0.456616	A0A8I6X488;F2E5X4
GO:0016638	oxidoreductase activity, acting on the CH-NH2 group of donors	2	8	0.0777686	0.456616	A0A8I6YBQ4;F2DMU4
GO:0016209	antioxidant activity	5	41	0.0931702	0.456616	A0A142I888;A0A7S9YWD1;A0A8I6WHE5;A0A8I6YE02;F2E5J1
GO:0005216	ion channel activity	2	9	0.0961825	0.456616	F2D8E6;F2DXG7
GO:0016684	oxidoreductase activity, acting on peroxide as acceptor	4	31	0.108892	0.456616	A0A7S9YWD1;A0A8I6WHE5;A0A8I6YE02;F2E5J1
GO:0016830	carbon-carbon lyase activity	5	43	0.109007	0.456616	A0A8I6WR80;A0A8I7BFL1;F2DG56;F2DYM4;Q5EXM3
GO:0045735	nutrient reservoir activity	3	20	0.112176	0.456616	A0A8I6X8F0;I6SJ22;P80198
GO:0001098	basal transcription machinery binding	1	2	0.115477	0.456616	F2EJZ7
GO:0001099	basal RNA polymerase II transcription machinery binding	1	2	0.115477	0.456616	F2EJZ7
GO:0004042	acetyl-CoA:L-glutamate N-acetyltransferase activity	1	2	0.115477	0.456616	F2CW53
GO:0004352	glutamate dehydrogenase (NAD+) activity	1	2	0.115477	0.456616	F2DMU4
GO:0004471	malate dehydrogenase (decarboxylating) (NAD+) activity	1	2	0.115477	0.456616	A0A8I6WSL2
GO:0004645	phosphorylase activity	1	2	0.115477	0.456616	F2E0G2
GO:0005548	phospholipid transporter activity	1	2	0.115477	0.456616	F2DGM5
GO:0008175	tRNA methyltransferase activity	1	2	0.115477	0.456616	F2ELG2
GO:0008184	glycogen phosphorylase activity	1	2	0.115477	0.456616	F2E0G2
GO:0009927	histidine phosphotransfer kinase activity	1	2	0.115477	0.456616	A0A8I6WXW1
GO:0015245	fatty acid transporter activity	1	2	0.115477	0.456616	F2EBY7
GO:0016174	NAD(P)H oxidase activity	1	2	0.115477	0.456616	A0A8I6YE02
GO:0016247	channel regulator activity	1	2	0.115477	0.456616	A0A8I6XBH2
GO:0016762	xyloglucan:xyloglucosyl transferase activity	1	2	0.115477	0.456616	F2D903
GO:0016841	ammonia-lyase activity	1	2	0.115477	0.456616	A0A8I6XC32
GO:0019788	NEDD8 transferase activity	1	2	0.115477	0.456616	F2DER7
GO:0022843	voltage-gated cation channel activity	1	2	0.115477	0.456616	F2DXG7
GO:0032266	phosphatidylinositol-3-phosphate binding	1	2	0.115477	0.456616	A0A8I7B5C4
GO:0035620	ceramide transporter activity	1	2	0.115477	0.456616	F2DGM5
GO:0043424	protein histidine kinase binding	1	2	0.115477	0.456616	A0A8I6WXW1
GO:0043495	protein anchor	1	2	0.115477	0.456616	A0A8I6X6U3
GO:0044325	ion channel binding	1	2	0.115477	0.456616	A0A8I6XBH2
GO:0046624	sphingolipid transporter activity	1	2	0.115477	0.456616	F2DGM5
GO:0046625	sphingolipid binding	1	2	0.115477	0.456616	F2DGM5
GO:0050664	oxidoreductase activity, acting on NAD(P)H, oxygen as acceptor	1	2	0.115477	0.456616	A0A8I6YE02
GO:0052856	NADHX epimerase activity	1	2	0.115477	0.456616	A0A8I6YBQ4
GO:0061666	UFM1 ligase activity	1	2	0.115477	0.456616	A0A8I6WAU3
GO:0070063	RNA polymerase binding	1	2	0.115477	0.456616	F2EJZ7
GO:0097001	ceramide binding	1	2	0.115477	0.456616	F2DGM5
GO:1902387	ceramide 1-phosphate binding	1	2	0.115477	0.456616	F2DGM5
GO:1902388	ceramide 1-phosphate transporter activity	1	2	0.115477	0.456616	F2DGM5
GO:0004519	endonuclease activity	2	10	0.115676	0.456616	A0A8I6Y3I8;M0WTN6
GO:0004521	endoribonuclease activity	2	10	0.115676	0.456616	A0A8I6Y3I8;M0WTN6
GO:0008234	cysteine-type peptidase activity	4	33	0.129456	0.495376	A0A8I6WYU4;A0A8I7B2U1;F2D811;F2DGN5
GO:0043130	ubiquitin binding	5	46	0.135035	0.495376	A0A8I6XEP7;A0A8I6Y2P0;A0A8I7B5C4;A0A8I7BBJ7;F2DP42
GO:0043295	glutathione binding	2	11	0.136058	0.495376	A0A8I6WE67;A0A8I6XBA4
GO:0061631	ubiquitin conjugating enzyme activity	2	11	0.136058	0.495376	F2CQ10;F2CQH9
GO:1900750	oligopeptide binding	2	11	0.136058	0.495376	A0A8I6WE67;A0A8I6XBA4
GO:0032182	ubiquitin-like protein binding	5	47	0.14428	0.495376	A0A8I6XEP7;A0A8I6Y2P0;A0A8I7B5C4;A0A8I7BBJ7;F2DP42
GO:0019787	ubiquitin-like protein transferase activity	4	35	0.151499	0.495376	A0A8I6WAU3;F2CQ10;F2CQH9;F2DER7
GO:0015267	channel activity	3	23	0.153481	0.495376	A0A8I7BBX4;F2D8E6;F2DXG7
GO:0022803	passive transmembrane transporter activity	3	23	0.153481	0.495376	A0A8I7BBX4;F2D8E6;F2DXG7
GO:0022838	substrate-specific channel activity	3	23	0.153481	0.495376	A0A8I7BBX4;F2D8E6;F2DXG7
GO:0019205	nucleobase-containing compound kinase activity	2	12	0.157154	0.495376	A0A287VZP8;F2E8P3
GO:0061650	ubiquitin-like protein conjugating enzyme activity	2	12	0.157154	0.495376	F2CQ10;F2CQH9
GO:0004148	dihydrolipoyl dehydrogenase activity	1	3	0.168142	0.495376	F2E2T3
GO:0004449	isocitrate dehydrogenase (NAD+) activity	1	3	0.168142	0.495376	F2DS63
GO:0004618	phosphoglycerate kinase activity	1	3	0.168142	0.495376	A0A8I6WDR8
GO:0004702	receptor signaling protein serine/threonine kinase activity	1	3	0.168142	0.495376	A0A8I6Y1U6
GO:0004707	MAP kinase activity	1	3	0.168142	0.495376	A0A8I6Y1U6
GO:0004784	superoxide dismutase activity	1	3	0.168142	0.495376	A0A142I888
GO:0005261	cation channel activity	1	3	0.168142	0.495376	F2DXG7
GO:0008199	ferric iron binding	1	3	0.168142	0.495376	A0A8I6XZU9
GO:0008242	omega peptidase activity	1	3	0.168142	0.495376	A0A8I6WVD2
GO:0009041	uridylate kinase activity	1	3	0.168142	0.495376	A0A287VZP8
GO:0016151	nickel cation binding	1	3	0.168142	0.495376	A0A287GME4
GO:0016641	oxidoreductase activity, acting on the CH-NH2 group of donors, oxygen as acceptor	1	3	0.168142	0.495376	A0A8I6YBQ4
GO:0016721	oxidoreductase activity, acting on superoxide radicals as acceptor	1	3	0.168142	0.495376	A0A142I888
GO:0016891	endoribonuclease activity, producing 5'-phosphomonoesters	1	3	0.168142	0.495376	A0A8I6Y3I8
GO:0016893	endonuclease activity, active with either ribo- or deoxyribonucleic acids and producing 5'-phosphomonoesters	1	3	0.168142	0.495376	A0A8I6Y3I8
GO:0030598	rRNA N-glycosylase activity	1	3	0.168142	0.495376	A0A8I6Z9Z3
GO:0033743	peptide-methionine (R)-S-oxide reductase activity	1	3	0.168142	0.495376	F2CZC9
GO:0033862	UMP kinase activity	1	3	0.168142	0.495376	A0A287VZP8
GO:0071568	UFM1 transferase activity	1	3	0.168142	0.495376	A0A8I6WAU3
GO:0043621	protein self-association	3	24	0.168188	0.495376	A0A8I6WYH3;A0A8I6X6U3;F2EGN2
GO:0005198	structural molecule activity	14	178	0.169088	0.495376	A0A8I6WKT1;A0A8I6X313;A0A8I6XLD0;A0A8I6XQU3;A0A8I6YL06;A0A8I7B601;F2CS15;F2CUI5;F2DVU2;F2E3Y1;F2EAX5;F2ECK7;F2EG94;F2EIG1
GO:0016776	phosphotransferase activity, phosphate group as acceptor	2	13	0.178809	0.515795	A0A287VZP8;F2E8P3
GO:0072341	modified amino acid binding	2	13	0.178809	0.515795	A0A8I6WE67;A0A8I6XBA4
GO:0046982	protein heterodimerization activity	4	38	0.18698	0.535249	A0A8I6WKT1;A0A8I6X313;A0A8I6XLD0;A0A8I6XQU3
GO:0005507	copper ion binding	2	14	0.200883	0.57069	A0A142I888;A0A8I6WJR5
GO:0016829	lyase activity	9	110	0.204687	0.570861	A0A8I6WR80;A0A8I6XC32;A0A8I6YC32;A0A8I6YGM4;A0A8I7BFL1;F2DE08;F2DG56;F2DYM4;Q5EXM3
GO:0004127	cytidylate kinase activity	1	4	0.217688	0.570861	A0A287VZP8
GO:0004351	glutamate decarboxylase activity	1	4	0.217688	0.570861	Q5EXM3
GO:0005102	receptor binding	1	4	0.217688	0.570861	F2CZW3
GO:0005546	phosphatidylinositol-4,5-bisphosphate binding	1	4	0.217688	0.570861	A0A287MLU2
GO:0008198	ferrous iron binding	1	4	0.217688	0.570861	A0A8I6XZU9
GO:0016639	oxidoreductase activity, acting on the CH-NH2 group of donors, NAD or NADP as acceptor	1	4	0.217688	0.570861	F2DMU4
GO:0017057	6-phosphogluconolactonase activity	1	4	0.217688	0.570861	A0A8I6YIL8
GO:0019213	deacetylase activity	1	4	0.217688	0.570861	F2EBB9
GO:0030597	RNA glycosylase activity	1	4	0.217688	0.570861	A0A8I6Z9Z3
GO:0030941	chloroplast targeting sequence binding	1	4	0.217688	0.570861	F2DVU1
GO:0004197	cysteine-type endopeptidase activity	2	15	0.22325	0.573416	A0A8I6WYU4;F2D811
GO:0004540	ribonuclease activity	2	15	0.22325	0.573416	A0A8I6Y3I8;M0WTN6
GO:0008171	O-methyltransferase activity	2	15	0.22325	0.573416	F2D5L5;F2DW39
GO:0030170	pyridoxal phosphate binding	4	41	0.224836	0.573562	A0A8I6XC32;F2DYM4;F2E0G2;Q5EXM3
GO:0004843	thiol-dependent ubiquitin-specific protease activity	2	16	0.245798	0.602757	A0A8I7B2U1;F2DGN5
GO:0036459	thiol-dependent ubiquitinyl hydrolase activity	2	16	0.245798	0.602757	A0A8I7B2U1;F2DGN5
GO:0004601	peroxidase activity	3	29	0.246688	0.602757	A0A7S9YWD1;A0A8I6YE02;F2E5J1
GO:0016831	carboxy-lyase activity	3	29	0.246688	0.602757	A0A8I7BFL1;F2DG56;Q5EXM3
GO:0033218	amide binding	4	43	0.251096	0.602757	A0A8I6WE67;A0A8I6XBA4;F2DGM5;F2DVU1
GO:0005543	phospholipid binding	3	30	0.263074	0.602757	A0A287MLU2;A0A8I7B5C4;F2DGM5
GO:0003714	transcription corepressor activity	1	5	0.2643	0.602757	A0A8I7BEI9
GO:0004470	malic enzyme activity	1	5	0.2643	0.602757	A0A8I6WSL2
GO:0005253	anion channel activity	1	5	0.2643	0.602757	F2D8E6
GO:0005496	steroid binding	1	5	0.2643	0.602757	A0A8I6YM43
GO:0008173	RNA methyltransferase activity	1	5	0.2643	0.602757	F2ELG2
GO:0008308	voltage-gated anion channel activity	1	5	0.2643	0.602757	F2D8E6
GO:0032934	sterol binding	1	5	0.2643	0.602757	A0A8I6YM43
GO:0042973	glucan endo-1,3-beta-D-glucosidase activity	1	5	0.2643	0.602757	F2D6T5
GO:0043531	ADP binding	1	5	0.2643	0.602757	A0A8I6WDR8
GO:1902936	phosphatidylinositol bisphosphate binding	1	5	0.2643	0.602757	A0A287MLU2
GO:0001071	nucleic acid binding transcription factor activity	2	17	0.268428	0.602757	A0A287H6P9;A0A8I6XLR3
GO:0003700	transcription factor activity, sequence-specific DNA binding	2	17	0.268428	0.602757	A0A287H6P9;A0A8I6XLR3
GO:0019783	ubiquitin-like protein-specific protease activity	2	17	0.268428	0.602757	A0A8I7B2U1;F2DGN5
GO:0042802	identical protein binding	2	17	0.268428	0.602757	F2D891;F2EGN2
GO:0046983	protein dimerization activity	5	60	0.284182	0.630886	A0A8I6WKT1;A0A8I6X313;A0A8I6XLD0;A0A8I6XQU3;F2EGN2
GO:0004518	nuclease activity	2	18	0.291049	0.630886	A0A8I6Y3I8;M0WTN6
GO:0004871	signal transducer activity	2	18	0.291049	0.630886	A0A8I6WXW1;A0A8I6Y1U6
GO:0016854	racemase and epimerase activity	2	18	0.291049	0.630886	A0A8I6XPB3;A0A8I6YBQ4
GO:0035091	phosphatidylinositol binding	2	18	0.291049	0.630886	A0A287MLU2;A0A8I7B5C4
GO:0101005	ubiquitinyl hydrolase activity	2	18	0.291049	0.630886	A0A8I7B2U1;F2DGN5
GO:0016860	intramolecular oxidoreductase activity	3	32	0.296208	0.63838	F2CPT7;F2CZW3;F2DAC4
GO:0003924	GTPase activity	6	77	0.307567	0.645565	A0A287GME4;A0A8I6X0W8;F2D9P7;F2DFB7;M0W534;M0WNW4
GO:0004448	isocitrate dehydrogenase activity	1	6	0.30815	0.645565	F2DS63
GO:0008080	N-acetyltransferase activity	1	6	0.30815	0.645565	F2CW53
GO:0016799	hydrolase activity, hydrolyzing N-glycosyl compounds	1	6	0.30815	0.645565	A0A8I6Z9Z3
GO:0019901	protein kinase binding	1	6	0.30815	0.645565	A0A8I6WXW1
GO:0004674	protein serine/threonine kinase activity	3	33	0.312884	0.64824	A0A8I6X7E0;A0A8I6Y1U6;A0A8I6Z0S4
GO:0008757	S-adenosylmethionine-dependent methyltransferase activity	3	33	0.312884	0.64824	F2D5L5;F2DW39;F2ELG2
GO:0016491	oxidoreductase activity	26	398	0.331701	0.681005	A0A142I888;A0A7S9YWD1;A0A8I6WHE5;A0A8I6WJR5;A0A8I6WSL2;A0A8I6X6D5;A0A8I6XFQ6;A0A8I6XK58;A0A8I6XU09;A0A8I6XZU9;A0A8I6YBQ4;A0A8I6YE02;A0A8I7B433;A0A8I7B647;F2CPT7;F2CXT5;F2CZC9;F2DC91;F2DKW3;F2DMU4;F2DNJ1;F2DS63;F2E2T3;F2E5J1;Q673G6;Q7XZK3
GO:0003690	double-stranded DNA binding	2	20	0.335962	0.681005	A0A8I6XLR3;A0A8I6YL06
GO:0015926	glucosidase activity	2	20	0.335962	0.681005	A0A8I6XTS4;F2D6T5
GO:0043565	sequence-specific DNA binding	2	20	0.335962	0.681005	A0A287H6P9;A0A8I6XLR3
GO:0000774	adenyl-nucleotide exchange factor activity	1	7	0.3494	0.693254	F2EGN2
GO:0000981	RNA polymerase II transcription factor activity, sequence-specific DNA binding	1	7	0.3494	0.693254	A0A8I6XLR3
GO:0004634	phosphopyruvate hydratase activity	1	7	0.3494	0.693254	A0A8I6YC32
GO:0005057	receptor signaling protein activity	1	7	0.3494	0.693254	A0A8I6Y1U6
GO:0005484	SNAP receptor activity	2	22	0.380015	0.735236	A0A8I6Y8G3;F2EEJ9
GO:0000339	RNA cap binding	1	8	0.388205	0.735236	A0A8I6W8C2
GO:0004222	metalloendopeptidase activity	1	8	0.388205	0.735236	A0A8I6Y9I1
GO:0008061	chitin binding	1	8	0.388205	0.735236	A0A8I7B722
GO:0016410	N-acyltransferase activity	1	8	0.388205	0.735236	F2CW53
GO:0016774	phosphotransferase activity, carboxyl group as acceptor	1	8	0.388205	0.735236	A0A8I6WDR8
GO:0016846	carbon-sulfur lyase activity	1	8	0.388205	0.735236	A0A8I6YGM4
GO:0019900	kinase binding	1	8	0.388205	0.735236	A0A8I6WXW1
GO:0031492	nucleosomal DNA binding	1	8	0.388205	0.735236	A0A8I6YL06
GO:0008168	methyltransferase activity	3	38	0.39604	0.746307	F2D5L5;F2DW39;F2ELG2
GO:0044769	ATPase activity, coupled to transmembrane movement of ions, rotational mechanism	2	23	0.40159	0.75298	A0A8I7B5T8;F2CQ37
GO:1901681	sulfur compound binding	2	24	0.422808	0.772864	A0A8I6WE67;A0A8I6XBA4
GO:0000977	RNA polymerase II regulatory region sequence-specific DNA binding	1	9	0.424708	0.772864	A0A8I6XLR3
GO:0001012	RNA polymerase II regulatory region DNA binding	1	9	0.424708	0.772864	A0A8I6XLR3
GO:0016668	oxidoreductase activity, acting on a sulfur group of donors, NAD(P) as acceptor	1	9	0.424708	0.772864	F2E2T3
GO:0016840	carbon-nitrogen lyase activity	1	9	0.424708	0.772864	A0A8I6XC32
GO:0042803	protein homodimerization activity	1	9	0.424708	0.772864	F2EGN2
GO:0004175	endopeptidase activity	5	72	0.42867	0.772864	A0A8I6WYU4;A0A8I6Y9I1;A0A8I6YMY2;A0A8I7BBJ7;F2D811
GO:0042277	peptide binding	3	40	0.428682	0.772864	A0A8I6WE67;A0A8I6XBA4;F2DVU1
GO:0022892	substrate-specific transporter activity	8	121	0.432289	0.775638	A0A8I7B5T8;A0A8I7BBX4;F2CQ37;F2D4G9;F2D8E6;F2DGM5;F2DXG7;F2EBY7
GO:0070011	peptidase activity, acting on L-amino acid peptides	9	138	0.438246	0.782583	A0A8I6WVD2;A0A8I6WYU4;A0A8I6XX74;A0A8I6Y9I1;A0A8I6YMY2;A0A8I7B2U1;A0A8I7BBJ7;F2D811;F2DGN5
GO:0003735	structural constituent of ribosome	7	106	0.445096	0.791048	F2CS15;F2CUI5;F2DVU2;F2EAX5;F2ECK7;F2EG94;F2EIG1
GO:0003756	protein disulfide isomerase activity	1	10	0.459044	0.79935	F2CPT7
GO:0016864	intramolecular oxidoreductase activity, transposing S-S bonds	1	10	0.459044	0.79935	F2CPT7
GO:0031490	chromatin DNA binding	1	10	0.459044	0.79935	A0A8I6YL06
GO:0043566	structure-specific DNA binding	1	10	0.459044	0.79935	A0A8I6YL06
GO:0008233	peptidase activity	9	141	0.464443	0.79935	A0A8I6WVD2;A0A8I6WYU4;A0A8I6XX74;A0A8I6Y9I1;A0A8I6YMY2;A0A8I7B2U1;A0A8I7BBJ7;F2D811;F2DGN5
GO:0005515	protein binding	24	391	0.468575	0.79935	A0A287MLU2;A0A8I6WKT1;A0A8I6WXW1;A0A8I6WYH3;A0A8I6X313;A0A8I6X6U3;A0A8I6XBH2;A0A8I6XEP7;A0A8I6XLD0;A0A8I6XQU3;A0A8I6Y2P0;A0A8I6Y4H4;A0A8I6Y8G3;A0A8I6YL06;A0A8I7B5C4;A0A8I7BBJ7;F2CZW3;F2D891;F2DGG1;F2DKP3;F2DP42;F2EEJ9;F2EGN2;F2EJZ7
GO:0016651	oxidoreductase activity, acting on NAD(P)H	3	43	0.476409	0.79935	A0A8I6YE02;F2DNJ1;F2E2T3
GO:0003677	DNA binding	8	126	0.478603	0.79935	A0A287H6P9;A0A8I6WKT1;A0A8I6X313;A0A8I6XLD0;A0A8I6XLR3;A0A8I6XQU3;A0A8I6XSQ9;A0A8I6YL06
GO:0004033	aldo-keto reductase (NADP) activity	1	11	0.491343	0.79935	A0A8I6X6D5
GO:0005085	guanyl-nucleotide exchange factor activity	1	11	0.491343	0.79935	A0A8I6XBH2
GO:0031491	nucleosome binding	1	11	0.491343	0.79935	A0A8I6YL06
GO:0060590	ATPase regulator activity	1	11	0.491343	0.79935	F2EGN2
GO:0005525	GTP binding	6	95	0.502118	0.79935	A0A287GME4;A0A8I6X0W8;F2D9P7;F2DFB7;M0W534;M0WNW4
GO:0019001	guanyl nucleotide binding	6	95	0.502118	0.79935	A0A287GME4;A0A8I6X0W8;F2D9P7;F2DFB7;M0W534;M0WNW4
GO:0032561	guanyl ribonucleotide binding	6	95	0.502118	0.79935	A0A287GME4;A0A8I6X0W8;F2D9P7;F2DFB7;M0W534;M0WNW4
GO:0009055	electron carrier activity	2	28	0.503513	0.79935	F2EAZ9;Q70DK2
GO:0016705	oxidoreductase activity, acting on paired donors, with incorporation or reduction of molecular oxygen	2	28	0.503513	0.79935	F2DC91;Q673G6
GO:0008324	cation transmembrane transporter activity	3	45	0.507199	0.79935	A0A8I7B5T8;F2CQ37;F2DXG7
GO:0000975	regulatory region DNA binding	1	12	0.521724	0.79935	A0A8I6XLR3
GO:0000976	transcription regulatory region sequence-specific DNA binding	1	12	0.521724	0.79935	A0A8I6XLR3
GO:0000988	transcription factor activity, protein binding	1	12	0.521724	0.79935	A0A8I7BEI9
GO:0000989	transcription factor activity, transcription factor binding	1	12	0.521724	0.79935	A0A8I7BEI9
GO:0001067	regulatory region nucleic acid binding	1	12	0.521724	0.79935	A0A8I6XLR3
GO:0003712	transcription cofactor activity	1	12	0.521724	0.79935	A0A8I7BEI9
GO:0008320	protein transmembrane transporter activity	1	12	0.521724	0.79935	F2D4G9
GO:0016615	malate dehydrogenase activity	1	12	0.521724	0.79935	A0A8I6WSL2
GO:0016706	oxidoreductase activity, acting on paired donors, with incorporation or reduction of molecular oxygen, 2-oxoglutarate as one donor, and incorporation of one atom each of oxygen into both donors	1	12	0.521724	0.79935	Q673G6
GO:0022884	macromolecule transmembrane transporter activity	1	12	0.521724	0.79935	F2D4G9
GO:0043178	alcohol binding	1	12	0.521724	0.79935	A0A8I6YM43
GO:0044212	transcription regulatory region DNA binding	1	12	0.521724	0.79935	A0A8I6XLR3
GO:0046933	proton-transporting ATP synthase activity, rotational mechanism	1	12	0.521724	0.79935	A0A8I7B5T8
GO:0060090	binding, bridging	1	12	0.521724	0.79935	A0A8I7B4D8
GO:0061659	ubiquitin-like protein ligase activity	1	12	0.521724	0.79935	A0A8I6WAU3
GO:0016741	transferase activity, transferring one-carbon groups	3	46	0.522242	0.79935	F2D5L5;F2DW39;F2ELG2
GO:0004672	protein kinase activity	3	47	0.537035	0.813691	A0A8I6X7E0;A0A8I6Y1U6;A0A8I6Z0S4
GO:0032403	protein complex binding	3	47	0.537035	0.813691	A0A287MLU2;A0A8I6YL06;F2EJZ7
GO:0004842	ubiquitin-protein transferase activity	2	30	0.54107	0.813691	F2CQ10;F2CQH9
GO:0016740	transferase activity	25	422	0.544835	0.813691	A0A287VZP8;A0A8I6WAU3;A0A8I6WDR8;A0A8I6WE67;A0A8I6WII2;A0A8I6WVD2;A0A8I6WXW1;A0A8I6X7E0;A0A8I6XBA4;A0A8I6XR17;A0A8I6Y1U6;A0A8I6Y1V9;A0A8I6Y5P8;A0A8I6Z0S4;F2CQ10;F2CQH9;F2CW53;F2D5L5;F2D903;F2DER7;F2DLT2;F2DW39;F2E0G2;F2E8P3;F2ELG2
GO:0003954	NADH dehydrogenase activity	1	13	0.5503	0.813691	F2DNJ1
GO:0016407	acetyltransferase activity	1	13	0.5503	0.813691	F2CW53
GO:0051015	actin filament binding	1	13	0.5503	0.813691	A0A287MLU2
GO:1990837	sequence-specific double-stranded DNA binding	1	13	0.5503	0.813691	A0A8I6XLR3
GO:0022891	substrate-specific transmembrane transporter activity	6	100	0.553612	0.813691	A0A8I7B5T8;A0A8I7BBX4;F2CQ37;F2D4G9;F2D8E6;F2DXG7
GO:0019829	cation-transporting ATPase activity	2	31	0.559103	0.813691	A0A8I7B5T8;F2CQ37
GO:0042625	ATPase coupled ion transmembrane transporter activity	2	31	0.559103	0.813691	A0A8I7B5T8;F2CQ37
GO:0019899	enzyme binding	3	49	0.565829	0.813691	A0A8I6WXW1;A0A8I6XBH2;F2EJZ7
GO:0005215	transporter activity	8	137	0.576586	0.813691	A0A8I7B5T8;A0A8I7BBX4;F2CQ37;F2D4G9;F2D8E6;F2DGM5;F2DXG7;F2EBY7
GO:0016820	hydrolase activity, acting on acid anhydrides, catalyzing transmembrane movement of substances	2	32	0.576629	0.813691	A0A8I7B5T8;F2CQ37
GO:0042626	ATPase activity, coupled to transmembrane movement of substances	2	32	0.576629	0.813691	A0A8I7B5T8;F2CQ37
GO:0043492	ATPase activity, coupled to movement of substances	2	32	0.576629	0.813691	A0A8I7B5T8;F2CQ37
GO:0004568	chitinase activity	1	14	0.577178	0.813691	A0A8I7B722
GO:0005372	water transmembrane transporter activity	1	14	0.577178	0.813691	A0A8I7BBX4
GO:0015250	water channel activity	1	14	0.577178	0.813691	A0A8I7BBX4
GO:0031267	small GTPase binding	1	14	0.577178	0.813691	A0A8I6XBH2
GO:0051020	GTPase binding	1	14	0.577178	0.813691	A0A8I6XBH2
GO:0060589	nucleoside-triphosphatase regulator activity	2	33	0.593645	0.833661	F2EGN2;M0WNW4
GO:0016301	kinase activity	7	122	0.597498	0.833661	A0A287VZP8;A0A8I6WDR8;A0A8I6WXW1;A0A8I6X7E0;A0A8I6Y1U6;A0A8I6Z0S4;F2E8P3
GO:0004180	carboxypeptidase activity	1	15	0.602459	0.833661	A0A8I6XX74
GO:0008422	beta-glucosidase activity	1	15	0.602459	0.833661	F2D6T5
GO:0046961	proton-transporting ATPase activity, rotational mechanism	1	15	0.602459	0.833661	F2CQ37
GO:0015078	hydrogen ion transmembrane transporter activity	2	34	0.610149	0.841198	A0A8I7B5T8;F2CQ37
GO:0015075	ion transmembrane transporter activity	4	71	0.618786	0.849779	A0A8I7B5T8;F2CQ37;F2D8E6;F2DXG7
GO:0015077	monovalent inorganic cation transmembrane transporter activity	2	35	0.626141	0.849779	A0A8I7B5T8;F2CQ37
GO:0016763	transferase activity, transferring pentosyl groups	1	16	0.626236	0.849779	F2DLT2
GO:0051539	4 iron, 4 sulfur cluster binding	1	16	0.626236	0.849779	F2DNJ1
GO:0044877	macromolecular complex binding	5	90	0.629616	0.849779	A0A287MLU2;A0A8I6XAI2;A0A8I6XEF6;A0A8I6YL06;F2EJZ7
GO:0051082	unfolded protein binding	4	72	0.629969	0.849779	A0A8I6WYH3;A0A8I6Y4H4;F2DGG1;F2EGN2
GO:0008238	exopeptidase activity	2	36	0.641624	0.856425	A0A8I6WVD2;A0A8I6XX74
GO:0046914	transition metal ion binding	8	145	0.64233	0.856425	A0A142I888;A0A287GME4;A0A8I6WDS1;A0A8I6WJR5;A0A8I6XZU9;F2DJM5;F2DKA4;F2EJZ7
GO:0000049	tRNA binding	1	17	0.648599	0.856425	F2ELG2
GO:0003746	translation elongation factor activity	1	17	0.648599	0.856425	A0A8I6XEF6
GO:0003779	actin binding	1	17	0.648599	0.856425	A0A287MLU2
GO:0030276	clathrin binding	1	17	0.648599	0.856425	F2DKP3
GO:0015399	primary active transmembrane transporter activity	2	37	0.6566	0.860927	A0A8I7B5T8;F2CQ37
GO:0015405	P-P-bond-hydrolysis-driven transmembrane transporter activity	2	37	0.6566	0.860927	A0A8I7B5T8;F2CQ37
GO:0005096	GTPase activator activity	1	18	0.669632	0.868899	M0WNW4
GO:0010181	FMN binding	1	18	0.669632	0.868899	A0A8I6YBQ4
GO:0036442	hydrogen-exporting ATPase activity	1	18	0.669632	0.868899	F2CQ37
GO:0003676	nucleic acid binding	30	537	0.684896	0.876371	A0A287H6P9;A0A8I6W8C2;A0A8I6WDS1;A0A8I6WKT1;A0A8I6X313;A0A8I6XD40;A0A8I6XEF6;A0A8I6XLD0;A0A8I6XLR3;A0A8I6XQU3;A0A8I6XSQ9;A0A8I6Y3I8;A0A8I6Y8L9;A0A8I6YF47;A0A8I6YL06;A0A8I6YSZ9;A0A8I7B2H8;A0A8I7BFP1;F2CS15;F2CTA6;F2CUI5;F2D3D5;F2DJM5;F2DKA4;F2DVU2;F2DXD4;F2E7F6;F2EAX5;F2ELG2;M0WTN6
GO:0016853	isomerase activity	5	96	0.686467	0.876371	A0A8I6XPB3;A0A8I6YBQ4;F2CPT7;F2CZW3;F2DAC4
GO:0003682	chromatin binding	1	19	0.689412	0.876371	A0A8I6YL06
GO:0004190	aspartic-type endopeptidase activity	1	19	0.689412	0.876371	A0A8I7BBJ7
GO:0043022	ribosome binding	1	19	0.689412	0.876371	A0A8I6XEF6
GO:0070001	aspartic-type peptidase activity	1	19	0.689412	0.876371	A0A8I7BBJ7
GO:0016836	hydro-lyase activity	2	40	0.69855	0.880071	A0A8I6YC32;F2DE08
GO:0022890	inorganic cation transmembrane transporter activity	2	40	0.69855	0.880071	A0A8I7B5T8;F2CQ37
GO:0022857	transmembrane transporter activity	6	116	0.699363	0.880071	A0A8I7B5T8;A0A8I7BBX4;F2CQ37;F2D4G9;F2D8E6;F2DXG7
GO:0003743	translation initiation factor activity	2	41	0.711564	0.8865	A0A8I6W8C2;F2DXD4
GO:0051536	iron-sulfur cluster binding	2	41	0.711564	0.8865	A0A8I7B0Y3;F2DNJ1
GO:0051540	metal cluster binding	2	41	0.711564	0.8865	A0A8I7B0Y3;F2DNJ1
GO:0008135	translation factor activity, RNA binding	3	62	0.724564	0.897908	A0A8I6W8C2;A0A8I6XEF6;F2DXD4
GO:0051537	2 iron, 2 sulfur cluster binding	1	21	0.725509	0.897908	A0A8I7B0Y3
GO:0008270	zinc ion binding	4	83	0.738793	0.91134	A0A8I6WDS1;F2DJM5;F2DKA4;F2EJZ7
GO:0030695	GTPase regulator activity	1	22	0.741962	0.912248	M0WNW4
GO:0051087	chaperone binding	1	23	0.757433	0.928227	F2EGN2
GO:0016835	carbon-oxygen lyase activity	2	46	0.769777	0.940203	A0A8I6YC32;F2DE08
GO:0005509	calcium ion binding	3	67	0.772241	0.940203	A0A8I6Y4H4;A0A8I6YE02;F2DGG1
GO:0016798	hydrolase activity, acting on glycosyl bonds	5	107	0.774727	0.940203	A0A8I6XTS4;A0A8I6Z9Z3;A0A8I7B722;F2D6T5;F2D903
GO:0016772	transferase activity, transferring phosphorus-containing groups	7	147	0.784495	0.947343	A0A287VZP8;A0A8I6WDR8;A0A8I6WXW1;A0A8I6X7E0;A0A8I6Y1U6;A0A8I6Z0S4;F2E8P3
GO:0008509	anion transmembrane transporter activity	1	25	0.785663	0.947343	F2D8E6
GO:0000149	SNARE binding	1	26	0.798528	0.953656	F2EEJ9
GO:0004252	serine-type endopeptidase activity	1	26	0.798528	0.953656	A0A8I6YMY2
GO:0005048	signal sequence binding	1	26	0.798528	0.953656	F2DVU1
GO:0016616	oxidoreductase activity, acting on the CH-OH group of donors, NAD or NADP as acceptor	4	91	0.801577	0.954258	A0A8I6WSL2;A0A8I6X6D5;A0A8I6XFQ6;F2DS63
GO:0016746	transferase activity, transferring acyl groups	2	50	0.808757	0.955925	A0A8I6WVD2;F2CW53
GO:0016758	transferase activity, transferring hexosyl groups	2	50	0.808757	0.955925	F2D903;F2E0G2
GO:0008565	protein transporter activity	1	27	0.810625	0.955925	F2D4G9
GO:0020037	heme binding	2	51	0.817543	0.960279	F2CTU5;F2CV55
GO:0016757	transferase activity, transferring glycosyl groups	3	73	0.820374	0.960279	F2D903;F2DLT2;F2E0G2
GO:0052689	carboxylic ester hydrolase activity	1	28	0.821999	0.960279	A0A8I6YIL8
GO:0008237	metallopeptidase activity	1	29	0.832694	0.965589	A0A8I6Y9I1
GO:0046906	tetrapyrrole binding	2	53	0.834043	0.965589	F2CTU5;F2CV55
GO:0016614	oxidoreductase activity, acting on CH-OH group of donors	4	96	0.834269	0.965589	A0A8I6WSL2;A0A8I6X6D5;A0A8I6XFQ6;F2DS63
GO:0005506	iron ion binding	1	30	0.84275	0.972404	A0A8I6XZU9
GO:0008047	enzyme activator activity	1	31	0.852205	0.977014	M0WNW4
GO:0051213	dioxygenase activity	1	31	0.852205	0.977014	Q673G6
GO:0022804	active transmembrane transporter activity	2	56	0.856287	0.977014	A0A8I7B5T8;F2CQ37
GO:0046872	metal ion binding	27	534	0.858217	0.977014	A0A142I888;A0A287GME4;A0A8I6WDS1;A0A8I6WJR5;A0A8I6WR80;A0A8I6WSL2;A0A8I6X0W8;A0A8I6XZU9;A0A8I6Y4H4;A0A8I6Y9I1;A0A8I6YBQ4;A0A8I6YC32;A0A8I6YE02;A0A8I6YGM4;A0A8I7B0Y3;A0A8I7B433;A0A8I7B5C4;F2CTU5;F2CV55;F2CZC9;F2DGG1;F2DJM5;F2DKA4;F2DKW3;F2DNJ1;F2EJZ7;Q673G6
GO:0043021	ribonucleoprotein complex binding	1	32	0.861095	0.977014	A0A8I6XEF6
GO:0004553	hydrolase activity, hydrolyzing O-glycosyl compounds	4	101	0.862378	0.977014	A0A8I6XTS4;A0A8I7B722;F2D6T5;F2D903
GO:0042623	ATPase activity, coupled	2	58	0.869577	0.982203	A0A8I7B5T8;F2CQ37
GO:0008092	cytoskeletal protein binding	1	34	0.87731	0.987962	A0A287MLU2
GO:0043169	cation binding	27	545	0.88518	0.99384	A0A142I888;A0A287GME4;A0A8I6WDS1;A0A8I6WJR5;A0A8I6WR80;A0A8I6WSL2;A0A8I6X0W8;A0A8I6XZU9;A0A8I6Y4H4;A0A8I6Y9I1;A0A8I6YBQ4;A0A8I6YC32;A0A8I6YE02;A0A8I6YGM4;A0A8I7B0Y3;A0A8I7B433;A0A8I7B5C4;F2CTU5;F2CV55;F2CZC9;F2DGG1;F2DJM5;F2DKA4;F2DKW3;F2DNJ1;F2EJZ7;Q673G6
GO:0017111	nucleoside-triphosphatase activity	9	210	0.891354	0.997785	A0A287GME4;A0A8I6X0W8;A0A8I7B5T8;F2CQ37;F2D5K0;F2D9P7;F2DFB7;M0W534;M0WNW4
GO:0016818	hydrolase activity, acting on acid anhydrides, in phosphorus-containing anhydrides	10	231	0.895237	0.999148	A0A287GME4;A0A8I6X0W8;A0A8I7B5T8;F2CQ37;F2D5K0;F2D9P7;F2DFB7;F2E0R2;M0W534;M0WNW4
GO:0005488	binding	103	1854	0.900287	0.99967	A0A142I888;A0A287GME4;A0A287H6P9;A0A287MLU2;A0A287VZP8;A0A8I6W8C2;A0A8I6WDR8;A0A8I6WDS1;A0A8I6WE67;A0A8I6WIX1;A0A8I6WJR5;A0A8I6WKT1;A0A8I6WR80;A0A8I6WSL2;A0A8I6WXW1;A0A8I6WYH3;A0A8I6X0W8;A0A8I6X313;A0A8I6X6U3;A0A8I6X7E0;A0A8I6XAI2;A0A8I6XBA4;A0A8I6XBH2;A0A8I6XC32;A0A8I6XD40;A0A8I6XEF6;A0A8I6XEP7;A0A8I6XLD0;A0A8I6XLR3;A0A8I6XQT6;A0A8I6XQU3;A0A8I6XSQ9;A0A8I6XZU9;A0A8I6Y1U6;A0A8I6Y2P0;A0A8I6Y3I8;A0A…
GO:0016817	hydrolase activity, acting on acid anhydrides	10	233	0.901036	0.99967	A0A287GME4;A0A8I6X0W8;A0A8I7B5T8;F2CQ37;F2D5K0;F2D9P7;F2DFB7;F2E0R2;M0W534;M0WNW4
GO:0048037	cofactor binding	7	177	0.913786	1	A0A8I6WSL2;A0A8I6XC32;A0A8I6YBQ4;F2DYM4;F2E0G2;F2E2T3;Q5EXM3
GO:0016747	transferase activity, transferring acyl groups other than amino-acyl groups	1	40	0.915503	1	F2CW53
GO:0003723	RNA binding	18	397	0.923155	1	A0A8I6W8C2;A0A8I6XD40;A0A8I6XEF6;A0A8I6Y8L9;A0A8I6YF47;A0A8I6YSZ9;A0A8I7B2H8;A0A8I7BFP1;F2CS15;F2CTA6;F2CUI5;F2D3D5;F2DKA4;F2DVU2;F2DXD4;F2EAX5;F2ELG2;M0WTN6
GO:0050660	flavin adenine dinucleotide binding	1	43	0.929898	1	F2E2T3
GO:0016773	phosphotransferase activity, alcohol group as acceptor	3	95	0.929982	1	A0A8I6X7E0;A0A8I6Y1U6;A0A8I6Z0S4
GO:0051287	NAD binding	1	44	0.934133	1	A0A8I6WSL2
GO:0016462	pyrophosphatase activity	9	229	0.939314	1	A0A287GME4;A0A8I6X0W8;A0A8I7B5T8;F2CQ37;F2D5K0;F2D9P7;F2DFB7;M0W534;M0WNW4
GO:0097159	organic cyclic compound binding	60	1164	0.942371	1	A0A287GME4;A0A287H6P9;A0A287VZP8;A0A8I6W8C2;A0A8I6WDR8;A0A8I6WDS1;A0A8I6WIX1;A0A8I6WKT1;A0A8I6WSL2;A0A8I6X0W8;A0A8I6X313;A0A8I6X7E0;A0A8I6XC32;A0A8I6XD40;A0A8I6XEF6;A0A8I6XLD0;A0A8I6XLR3;A0A8I6XQU3;A0A8I6XSQ9;A0A8I6Y1U6;A0A8I6Y3I8;A0A8I6Y8L9;A0A8I6YBQ4;A0A8I6YF47;A0A8I6YL06;A0A8I6YM43;A0A8I6YSZ9;A0A8I6Z0S4;A0A8I7B2H8;A0A8I7BFL1;A0A8I7BFP1;F2CQ10;F2CQH9;F2CS15;F2CTA6;F2CTU5;F2CUI5;F2CV55;F2D3D5;F2…
GO:0003729	mRNA binding	4	123	0.942807	1	A0A8I6XD40;A0A8I7B2H8;F2CS15;F2CUI5
GO:0044822	poly(A) RNA binding	4	123	0.942807	1	A0A8I6XD40;A0A8I7B2H8;F2CS15;F2CUI5
GO:0000287	magnesium ion binding	1	47	0.945369	1	A0A8I6YC32
GO:0008236	serine-type peptidase activity	1	47	0.945369	1	A0A8I6YMY2
GO:0017171	serine hydrolase activity	1	47	0.945369	1	A0A8I6YMY2
GO:1901363	heterocyclic compound binding	59	1159	0.954605	1	A0A287GME4;A0A287H6P9;A0A287VZP8;A0A8I6W8C2;A0A8I6WDR8;A0A8I6WDS1;A0A8I6WIX1;A0A8I6WKT1;A0A8I6WSL2;A0A8I6X0W8;A0A8I6X313;A0A8I6X7E0;A0A8I6XC32;A0A8I6XD40;A0A8I6XEF6;A0A8I6XLD0;A0A8I6XLR3;A0A8I6XQU3;A0A8I6XSQ9;A0A8I6Y1U6;A0A8I6Y3I8;A0A8I6Y8L9;A0A8I6YBQ4;A0A8I6YF47;A0A8I6YL06;A0A8I6YSZ9;A0A8I6Z0S4;A0A8I7B2H8;A0A8I7BFL1;A0A8I7BFP1;F2CQ10;F2CQH9;F2CS15;F2CTA6;F2CTU5;F2CUI5;F2CV55;F2D3D5;F2D5K0;F2D9P7…
GO:0016887	ATPase activity	3	113	0.969668	1	A0A8I7B5T8;F2CQ37;F2D5K0
GO:0043168	anion binding	29	647	0.97338	1	A0A287GME4;A0A287MLU2;A0A287VZP8;A0A8I6WDR8;A0A8I6WE67;A0A8I6WIX1;A0A8I6X0W8;A0A8I6X7E0;A0A8I6XBA4;A0A8I6XC32;A0A8I6Y1U6;A0A8I6YBQ4;A0A8I6Z0S4;A0A8I7B5C4;A0A8I7BFL1;F2CQ10;F2CQH9;F2D5K0;F2D9P7;F2DER7;F2DFB7;F2DGM5;F2DYM4;F2E0G2;F2E2T3;F2E8P3;M0W534;M0WNW4;Q5EXM3
GO:0043167	ion binding	52	1071	0.978056	1	A0A142I888;A0A287GME4;A0A287MLU2;A0A287VZP8;A0A8I6WDR8;A0A8I6WDS1;A0A8I6WE67;A0A8I6WIX1;A0A8I6WJR5;A0A8I6WR80;A0A8I6WSL2;A0A8I6X0W8;A0A8I6X7E0;A0A8I6XBA4;A0A8I6XC32;A0A8I6XZU9;A0A8I6Y1U6;A0A8I6Y4H4;A0A8I6Y9I1;A0A8I6YBQ4;A0A8I6YC32;A0A8I6YE02;A0A8I6YGM4;A0A8I6Z0S4;A0A8I7B0Y3;A0A8I7B433;A0A8I7B5C4;A0A8I7BFL1;F2CQ10;F2CQH9;F2CTU5;F2CV55;F2CZC9;F2D5K0;F2D9P7;F2DER7;F2DFB7;F2DGG1;F2DGM5;F2DJM5;F2DKA4;…
GO:0017076	purine nucleotide binding	19	470	0.981992	1	A0A287GME4;A0A287VZP8;A0A8I6WDR8;A0A8I6WIX1;A0A8I6X0W8;A0A8I6X7E0;A0A8I6Y1U6;A0A8I6Z0S4;A0A8I7BFL1;F2CQ10;F2CQH9;F2D5K0;F2D9P7;F2DER7;F2DFB7;F2E8P3;F2EGN2;M0W534;M0WNW4
GO:0016788	hydrolase activity, acting on ester bonds	3	124	0.982221	1	A0A8I6Y3I8;A0A8I6YIL8;M0WTN6
GO:0097367	carbohydrate derivative binding	20	494	0.984139	1	A0A287GME4;A0A287VZP8;A0A8I6WDR8;A0A8I6WIX1;A0A8I6X0W8;A0A8I6X7E0;A0A8I6Y1U6;A0A8I6YBQ4;A0A8I6Z0S4;A0A8I7B722;A0A8I7BFL1;F2CQ10;F2CQH9;F2D5K0;F2D9P7;F2DER7;F2DFB7;F2E8P3;M0W534;M0WNW4
GO:0050662	coenzyme binding	3	127	0.984672	1	A0A8I6WSL2;A0A8I6YBQ4;F2E2T3
GO:0003824	catalytic activity	89	1715	0.984742	1	A0A142I888;A0A287GME4;A0A287VZP8;A0A7S9YWD1;A0A8I6WAU3;A0A8I6WDR8;A0A8I6WE67;A0A8I6WHE5;A0A8I6WII2;A0A8I6WJR5;A0A8I6WR80;A0A8I6WSL2;A0A8I6WVD2;A0A8I6WXW1;A0A8I6WYU4;A0A8I6X0W8;A0A8I6X6D5;A0A8I6X7E0;A0A8I6XBA4;A0A8I6XC32;A0A8I6XFQ6;A0A8I6XK58;A0A8I6XPB3;A0A8I6XR17;A0A8I6XTS4;A0A8I6XU09;A0A8I6XX74;A0A8I6XZU9;A0A8I6Y1U6;A0A8I6Y1V9;A0A8I6Y3I8;A0A8I6Y5P8;A0A8I6Y9I1;A0A8I6YBQ4;A0A8I6YC32;A0A8I6YE02;A0A…
GO:0035639	purine ribonucleoside triphosphate binding	18	461	0.987041	1	A0A287GME4;A0A287VZP8;A0A8I6WDR8;A0A8I6WIX1;A0A8I6X0W8;A0A8I6X7E0;A0A8I6Y1U6;A0A8I6Z0S4;A0A8I7BFL1;F2CQ10;F2CQH9;F2D5K0;F2D9P7;F2DER7;F2DFB7;F2E8P3;M0W534;M0WNW4
GO:0032553	ribonucleotide binding	19	481	0.987059	1	A0A287GME4;A0A287VZP8;A0A8I6WDR8;A0A8I6WIX1;A0A8I6X0W8;A0A8I6X7E0;A0A8I6Y1U6;A0A8I6YBQ4;A0A8I6Z0S4;A0A8I7BFL1;F2CQ10;F2CQH9;F2D5K0;F2D9P7;F2DER7;F2DFB7;F2E8P3;M0W534;M0WNW4
GO:0001882	nucleoside binding	18	463	0.987822	1	A0A287GME4;A0A287VZP8;A0A8I6WDR8;A0A8I6WIX1;A0A8I6X0W8;A0A8I6X7E0;A0A8I6Y1U6;A0A8I6Z0S4;A0A8I7BFL1;F2CQ10;F2CQH9;F2D5K0;F2D9P7;F2DER7;F2DFB7;F2E8P3;M0W534;M0WNW4
GO:0001883	purine nucleoside binding	18	463	0.987822	1	A0A287GME4;A0A287VZP8;A0A8I6WDR8;A0A8I6WIX1;A0A8I6X0W8;A0A8I6X7E0;A0A8I6Y1U6;A0A8I6Z0S4;A0A8I7BFL1;F2CQ10;F2CQH9;F2D5K0;F2D9P7;F2DER7;F2DFB7;F2E8P3;M0W534;M0WNW4
GO:0032549	ribonucleoside binding	18	463	0.987822	1	A0A287GME4;A0A287VZP8;A0A8I6WDR8;A0A8I6WIX1;A0A8I6X0W8;A0A8I6X7E0;A0A8I6Y1U6;A0A8I6Z0S4;A0A8I7BFL1;F2CQ10;F2CQH9;F2D5K0;F2D9P7;F2DER7;F2DFB7;F2E8P3;M0W534;M0WNW4
GO:0032550	purine ribonucleoside binding	18	463	0.987822	1	A0A287GME4;A0A287VZP8;A0A8I6WDR8;A0A8I6WIX1;A0A8I6X0W8;A0A8I6X7E0;A0A8I6Y1U6;A0A8I6Z0S4;A0A8I7BFL1;F2CQ10;F2CQH9;F2D5K0;F2D9P7;F2DER7;F2DFB7;F2E8P3;M0W534;M0WNW4
GO:0032555	purine ribonucleotide binding	18	463	0.987822	1	A0A287GME4;A0A287VZP8;A0A8I6WDR8;A0A8I6WIX1;A0A8I6X0W8;A0A8I6X7E0;A0A8I6Y1U6;A0A8I6Z0S4;A0A8I7BFL1;F2CQ10;F2CQH9;F2D5K0;F2D9P7;F2DER7;F2DFB7;F2E8P3;M0W534;M0WNW4
GO:0016787	hydrolase activity	28	670	0.991391	1	A0A287GME4;A0A8I6WVD2;A0A8I6WYU4;A0A8I6X0W8;A0A8I6XTS4;A0A8I6XX74;A0A8I6Y3I8;A0A8I6Y9I1;A0A8I6YIL8;A0A8I6YMY2;A0A8I6Z9Z3;A0A8I7B2U1;A0A8I7B5T8;A0A8I7B722;A0A8I7BBJ7;F2CQ37;F2D5K0;F2D6T5;F2D811;F2D903;F2D9P7;F2DFB7;F2DGN5;F2E0R2;F2EBB9;M0W534;M0WNW4;M0WTN6
GO:0030554	adenyl nucleotide binding	13	377	0.993114	1	A0A287VZP8;A0A8I6WDR8;A0A8I6WIX1;A0A8I6X7E0;A0A8I6Y1U6;A0A8I6Z0S4;A0A8I7BFL1;F2CQ10;F2CQH9;F2D5K0;F2DER7;F2E8P3;F2EGN2
GO:0000166	nucleotide binding	23	595	0.995618	1	A0A287GME4;A0A287VZP8;A0A8I6WDR8;A0A8I6WIX1;A0A8I6WSL2;A0A8I6X0W8;A0A8I6X7E0;A0A8I6Y1U6;A0A8I6YBQ4;A0A8I6Z0S4;A0A8I7BFL1;F2CQ10;F2CQH9;F2D5K0;F2D9P7;F2DER7;F2DFB7;F2DMU4;F2E2T3;F2E8P3;F2EGN2;M0W534;M0WNW4
GO:1901265	nucleoside phosphate binding	23	595	0.995618	1	A0A287GME4;A0A287VZP8;A0A8I6WDR8;A0A8I6WIX1;A0A8I6WSL2;A0A8I6X0W8;A0A8I6X7E0;A0A8I6Y1U6;A0A8I6YBQ4;A0A8I6Z0S4;A0A8I7BFL1;F2CQ10;F2CQH9;F2D5K0;F2D9P7;F2DER7;F2DFB7;F2DMU4;F2E2T3;F2E8P3;F2EGN2;M0W534;M0WNW4
GO:0005524	ATP binding	12	368	0.995656	1	A0A287VZP8;A0A8I6WDR8;A0A8I6WIX1;A0A8I6X7E0;A0A8I6Y1U6;A0A8I6Z0S4;A0A8I7BFL1;F2CQ10;F2CQH9;F2D5K0;F2DER7;F2E8P3
GO:0032559	adenyl ribonucleotide binding	12	370	0.995972	1	A0A287VZP8;A0A8I6WDR8;A0A8I6WIX1;A0A8I6X7E0;A0A8I6Y1U6;A0A8I6Z0S4;A0A8I7BFL1;F2CQ10;F2CQH9;F2D5K0;F2DER7;F2E8P3
GO:0036094	small molecule binding	24	634	0.997659	1	A0A287GME4;A0A287VZP8;A0A8I6WDR8;A0A8I6WIX1;A0A8I6WSL2;A0A8I6X0W8;A0A8I6X7E0;A0A8I6Y1U6;A0A8I6YBQ4;A0A8I6YM43;A0A8I6Z0S4;A0A8I7BFL1;F2CQ10;F2CQH9;F2D5K0;F2D9P7;F2DER7;F2DFB7;F2DMU4;F2E2T3;F2E8P3;F2EGN2;M0W534;M0WNW4
GO:0003674	molecular_function	171	2874	1	1	A0A142I888;A0A287DTW3;A0A287GME4;A0A287H6P9;A0A287MLU2;A0A287VZP8;A0A7S9YWD1;A0A8I6W8C2;A0A8I6WAU3;A0A8I6WDR8;A0A8I6WDS1;A0A8I6WE67;A0A8I6WHB0;A0A8I6WHE5;A0A8I6WII2;A0A8I6WIX1;A0A8I6WJR5;A0A8I6WKT1;A0A8I6WLJ4;A0A8I6WML8;A0A8I6WR80;A0A8I6WSL2;A0A8I6WVD2;A0A8I6WXW1;A0A8I6WYH3;A0A8I6WYU4;A0A8I6X0W8;A0A8I6X313;A0A8I6X488;A0A8I6X6D5;A0A8I6X6U3;A0A8I6X7E0;A0A8I6X8F0;A0A8I6XAI2;A0A8I6XBA4;A0A8I6XBH2;A0A…

## Sheet: BP
GO ID	Description	out (157)	All (2571)	pvalue	p.adjust	Genes
GO:0006869	lipid transport	7	22	0.000216828	0.214876	A0A8I6XQT6;A0A8I6YM43;A0A8I6Z597;F2CXD7;F2D9V7;F2DGM5;Q5UNP2
GO:0050896	response to stimulus	47	501	0.000787388	0.251957	A0A067YHQ4;A0A287H6P9;A0A7S9YWD1;A0A8I6WAU3;A0A8I6WDS1;A0A8I6WE67;A0A8I6WHE5;A0A8I6WII2;A0A8I6WLJ4;A0A8I6WML8;A0A8I6WTG0;A0A8I6WXW1;A0A8I6WYH3;A0A8I6X488;A0A8I6X7E0;A0A8I6XBA4;A0A8I6XJ52;A0A8I6XKT3;A0A8I6Y5P8;A0A8I6YSV4;A0A8I6Z0S4;A0A8I6Z9Z3;A0A8I7B3E2;A1X810;A3RHH8;A8V3Y1;A8V400;F2CPT7;F2CQH9;F2CTU5;F2CV55;F2CXD7;F2CZC9;F2DGM5;F2DMU4;F2DVU1;F2E0G2;F2E5J1;F2E5X4;F2EGN2;M0WNW4;M0XBS5;P33044;Q673G6…
GO:0032365	intracellular lipid transport	3	4	0.00085434	0.251957	A0A8I6YM43;F2CXD7;F2DGM5
GO:0009611	response to wounding	5	14	0.00101698	0.251957	A0A8I6WLJ4;A0A8I6WML8;A8V3Y1;A8V400;M0XBS5
GO:0010876	lipid localization	7	29	0.00137924	0.273365	A0A8I6XQT6;A0A8I6YM43;A0A8I6Z597;F2CXD7;F2D9V7;F2DGM5;Q5UNP2
GO:0032509	endosome transport via multivesicular body sorting pathway	5	18	0.00356418	0.456083	A0A8I6XAI2;A0A8I6YLU5;A0A8I7B5C4;F2D2Z9;F2DA66
GO:0006810	transport	38	411	0.00385184	0.456083	A0A287LRJ1;A0A8I6WTG0;A0A8I6WUP0;A0A8I6X7E0;A0A8I6XAI2;A0A8I6XBH2;A0A8I6XLR3;A0A8I6XQT6;A0A8I6XZU9;A0A8I6Y8G3;A0A8I6YEZ5;A0A8I6YLU5;A0A8I6YM43;A0A8I6Z597;A0A8I7B4D8;A0A8I7B5C4;F2CXD7;F2CXT5;F2D2Z9;F2D4G9;F2D5K0;F2D9P7;F2D9V7;F2DA66;F2DGM5;F2DKP3;F2DP42;F2DVU1;F2DXG7;F2E1R5;F2E376;F2E7F7;F2EEJ9;M0W534;M0WNW4;M0WWJ8;Q5UNP2;Q7XZK3
GO:0006950	response to stress	33	343	0.0039364	0.456083	A0A067YHQ4;A0A287H6P9;A0A7S9YWD1;A0A8I6WAU3;A0A8I6WDS1;A0A8I6WHE5;A0A8I6WLJ4;A0A8I6WML8;A0A8I6WYH3;A0A8I6X488;A0A8I6XKT3;A0A8I6YSV4;A0A8I6Z9Z3;A3RHH8;A8V3Y1;A8V400;F2CPT7;F2CQH9;F2CTU5;F2CV55;F2CZC9;F2DGM5;F2DMU4;F2DVU1;F2E0G2;F2E5J1;F2E5X4;F2EGN2;M0XBS5;P33044;Q7XZK3;Q9SBI7;T1TD43
GO:0051234	establishment of localization	38	414	0.00438579	0.456083	A0A287LRJ1;A0A8I6WTG0;A0A8I6WUP0;A0A8I6X7E0;A0A8I6XAI2;A0A8I6XBH2;A0A8I6XLR3;A0A8I6XQT6;A0A8I6XZU9;A0A8I6Y8G3;A0A8I6YEZ5;A0A8I6YLU5;A0A8I6YM43;A0A8I6Z597;A0A8I7B4D8;A0A8I7B5C4;F2CXD7;F2CXT5;F2D2Z9;F2D4G9;F2D5K0;F2D9P7;F2D9V7;F2DA66;F2DGM5;F2DKP3;F2DP42;F2DVU1;F2DXG7;F2E1R5;F2E376;F2E7F7;F2EEJ9;M0W534;M0WNW4;M0WWJ8;Q5UNP2;Q7XZK3
GO:0045324	late endosome to vacuole transport	5	19	0.00460225	0.456083	A0A8I6XAI2;A0A8I6YLU5;A0A8I7B5C4;F2D2Z9;F2DA66
GO:0031325	positive regulation of cellular metabolic process	5	21	0.00729242	0.548251	A0A287H6P9;A0A8I6X7E0;A0A8I6XEF6;A0A8I6YSZ9;F2DVU1
GO:0016197	endosomal transport	7	39	0.00811088	0.548251	A0A8I6XAI2;A0A8I6YLU5;A0A8I7B5C4;F2D2Z9;F2D5K0;F2DA66;F2DP42
GO:0009414	response to water deprivation	6	30	0.00821864	0.548251	A0A067YHQ4;A0A8I6XKT3;A3RHH8;F2E0G2;Q9SBI7;T1TD43
GO:0009415	response to water	6	30	0.00821864	0.548251	A0A067YHQ4;A0A8I6XKT3;A3RHH8;F2E0G2;Q9SBI7;T1TD43
GO:0042221	response to chemical	20	187	0.00829844	0.548251	A0A067YHQ4;A0A8I6WE67;A0A8I6WHE5;A0A8I6WII2;A0A8I6WTG0;A0A8I6WXW1;A0A8I6WYH3;A0A8I6XBA4;A0A8I6XJ52;A0A8I6XKT3;A0A8I6Y5P8;A0A8I7B3E2;A3RHH8;F2CXD7;F2DGM5;F2DMU4;F2E0G2;F2E5J1;Q9SBI7;T1TD43
GO:0007034	vacuolar transport	6	31	0.0096883	0.593933	A0A8I6XAI2;A0A8I6YLU5;A0A8I7B5C4;F2D2Z9;F2DA66;F2DP42
GO:0032511	late endosome to vacuole transport via multivesicular body sorting pathway	4	15	0.0107503	0.593933	A0A8I6XAI2;A0A8I7B5C4;F2D2Z9;F2DA66
GO:0044765	single-organism transport	29	312	0.0113865	0.593933	A0A8I6WUP0;A0A8I6XAI2;A0A8I6XBH2;A0A8I6XLR3;A0A8I6XQT6;A0A8I6XZU9;A0A8I6Y8G3;A0A8I6YLU5;A0A8I6YM43;A0A8I6Z597;A0A8I7B4D8;A0A8I7B5C4;F2CXD7;F2CXT5;F2D2Z9;F2D4G9;F2D5K0;F2D9V7;F2DA66;F2DGM5;F2DP42;F2DVU1;F2DXG7;F2E1R5;F2E7F7;F2EEJ9;M0W534;M0WWJ8;Q5UNP2
GO:0051179	localization	38	441	0.0127596	0.593933	A0A287LRJ1;A0A8I6WTG0;A0A8I6WUP0;A0A8I6X7E0;A0A8I6XAI2;A0A8I6XBH2;A0A8I6XLR3;A0A8I6XQT6;A0A8I6XZU9;A0A8I6Y8G3;A0A8I6YEZ5;A0A8I6YLU5;A0A8I6YM43;A0A8I6Z597;A0A8I7B4D8;A0A8I7B5C4;F2CXD7;F2CXT5;F2D2Z9;F2D4G9;F2D5K0;F2D9P7;F2D9V7;F2DA66;F2DGM5;F2DKP3;F2DP42;F2DVU1;F2DXG7;F2E1R5;F2E376;F2E7F7;F2EEJ9;M0W534;M0WNW4;M0WWJ8;Q5UNP2;Q7XZK3
GO:0001101	response to acid chemical	9	63	0.012864	0.593933	A0A067YHQ4;A0A8I6XJ52;A0A8I6XKT3;A0A8I7B3E2;A3RHH8;F2DGM5;F2E0G2;Q9SBI7;T1TD43
GO:0010604	positive regulation of macromolecule metabolic process	5	24	0.013131	0.593933	A0A287H6P9;A0A8I6X7E0;A0A8I6XEF6;A0A8I6YSZ9;F2DVU1
GO:0032270	positive regulation of cellular protein metabolic process	3	9	0.0142825	0.593933	A0A8I6X7E0;A0A8I6XEF6;F2DVU1
GO:0009893	positive regulation of metabolic process	5	25	0.0156238	0.593933	A0A287H6P9;A0A8I6X7E0;A0A8I6XEF6;A0A8I6YSZ9;F2DVU1
GO:0009631	cold acclimation	4	17	0.0170364	0.593933	A0A067YHQ4;A3RHH8;Q9SBI7;T1TD43
GO:0007166	cell surface receptor signaling pathway	3	10	0.019502	0.593933	A0A8I6WTG0;A0A8I6X7E0;F2DVU1
GO:0051247	positive regulation of protein metabolic process	3	10	0.019502	0.593933	A0A8I6X7E0;A0A8I6XEF6;F2DVU1
GO:0032434	regulation of proteasomal ubiquitin-dependent protein catabolic process	2	4	0.0204914	0.593933	A0A8I6WAU3;A0A8I6X7E0
GO:1902578	single-organism localization	29	327	0.0210592	0.593933	A0A8I6WUP0;A0A8I6XAI2;A0A8I6XBH2;A0A8I6XLR3;A0A8I6XQT6;A0A8I6XZU9;A0A8I6Y8G3;A0A8I6YLU5;A0A8I6YM43;A0A8I6Z597;A0A8I7B4D8;A0A8I7B5C4;F2CXD7;F2CXT5;F2D2Z9;F2D4G9;F2D5K0;F2D9V7;F2DA66;F2DGM5;F2DP42;F2DVU1;F2DXG7;F2E1R5;F2E7F7;F2EEJ9;M0W534;M0WWJ8;Q5UNP2
GO:0009409	response to cold	6	37	0.0226096	0.593933	A0A067YHQ4;A3RHH8;F2DMU4;Q7XZK3;Q9SBI7;T1TD43
GO:0006749	glutathione metabolic process	5	29	0.0286924	0.593933	A0A8I6WE67;A0A8I6WII2;A0A8I6WVD2;A0A8I6XBA4;A0A8I6Y5P8
GO:0006536	glutamate metabolic process	3	12	0.0326779	0.593933	F2DG56;F2DMU4;Q5EXM3
GO:0045454	cell redox homeostasis	3	12	0.0326779	0.593933	A0A7S9YWD1;A0A8I6WHE5;F2E5J1
GO:0016055	Wnt signaling pathway	2	5	0.0327922	0.593933	A0A8I6X7E0;F2DVU1
GO:0030111	regulation of Wnt signaling pathway	2	5	0.0327922	0.593933	A0A8I6X7E0;F2DVU1
GO:0060070	canonical Wnt signaling pathway	2	5	0.0327922	0.593933	A0A8I6X7E0;F2DVU1
GO:0060828	regulation of canonical Wnt signaling pathway	2	5	0.0327922	0.593933	A0A8I6X7E0;F2DVU1
GO:0061136	regulation of proteasomal protein catabolic process	2	5	0.0327922	0.593933	A0A8I6WAU3;A0A8I6X7E0
GO:1903050	regulation of proteolysis involved in cellular protein catabolic process	2	5	0.0327922	0.593933	A0A8I6WAU3;A0A8I6X7E0
GO:1903362	regulation of cellular protein catabolic process	2	5	0.0327922	0.593933	A0A8I6WAU3;A0A8I6X7E0
GO:0009737	response to abscisic acid	6	43	0.0439236	0.593933	A0A067YHQ4;A0A8I6XJ52;A0A8I7B3E2;A3RHH8;Q9SBI7;T1TD43
GO:0006538	glutamate catabolic process	2	6	0.0472395	0.593933	F2DMU4;Q5EXM3
GO:0006879	cellular iron ion homeostasis	2	6	0.0472395	0.593933	A0A8I6XZU9;A0A8I7B0Y3
GO:0043244	regulation of protein complex disassembly	2	6	0.0472395	0.593933	A0A287MLU2;A0A8I6XEF6
GO:0055072	iron ion homeostasis	2	6	0.0472395	0.593933	A0A8I6XZU9;A0A8I7B0Y3
GO:0010154	fruit development	4	23	0.0477131	0.593933	A0A8I6WXG8;A0A8I6YNS5;F2CXD7;F2DZK3
GO:0048316	seed development	4	23	0.0477131	0.593933	A0A8I6WXG8;A0A8I6YNS5;F2CXD7;F2DZK3
GO:0010033	response to organic substance	10	92	0.0509545	0.593933	A0A067YHQ4;A0A8I6WTG0;A0A8I6WXW1;A0A8I6XJ52;A0A8I7B3E2;A3RHH8;F2CXD7;F2DGM5;Q9SBI7;T1TD43
GO:1901700	response to oxygen-containing compound	11	105	0.0522887	0.593933	A0A067YHQ4;A0A8I6WYH3;A0A8I6XJ52;A0A8I6XKT3;A0A8I7B3E2;A3RHH8;F2CXD7;F2DGM5;F2E0G2;Q9SBI7;T1TD43
GO:0071702	organic substance transport	26	310	0.0525783	0.593933	A0A287LRJ1;A0A8I6WUP0;A0A8I6XAI2;A0A8I6XBH2;A0A8I6XQT6;A0A8I6Y8G3;A0A8I6YEZ5;A0A8I6YLU5;A0A8I6YM43;A0A8I6Z597;A0A8I7B4D8;A0A8I7B5C4;F2CXD7;F2CXT5;F2D4G9;F2D9P7;F2D9V7;F2DGM5;F2DKP3;F2DP42;F2DVU1;F2E1R5;F2E7F7;F2EEJ9;M0W534;Q5UNP2
GO:0048522	positive regulation of cellular process	5	34	0.0526874	0.593933	A0A287H6P9;A0A8I6X7E0;A0A8I6XEF6;A0A8I6YSZ9;F2DVU1
GO:0097305	response to alcohol	6	45	0.0531278	0.593933	A0A067YHQ4;A0A8I6XJ52;A0A8I7B3E2;A3RHH8;Q9SBI7;T1TD43
GO:0010035	response to inorganic substance	7	57	0.0557156	0.593933	A0A067YHQ4;A0A8I6WYH3;A0A8I6XKT3;A3RHH8;F2E0G2;Q9SBI7;T1TD43
GO:0033993	response to lipid	6	46	0.0581393	0.593933	A0A067YHQ4;A0A8I6XJ52;A0A8I7B3E2;A3RHH8;Q9SBI7;T1TD43
GO:0043648	dicarboxylic acid metabolic process	6	46	0.0581393	0.593933	A0A8I6WSL2;A0A8I6XPB3;F2DG56;F2DMU4;F2DYM4;Q5EXM3
GO:0010628	positive regulation of gene expression	3	15	0.0591186	0.593933	A0A287H6P9;A0A8I6XEF6;A0A8I6YSZ9
GO:0051173	positive regulation of nitrogen compound metabolic process	3	15	0.0591186	0.593933	A0A287H6P9;A0A8I6XEF6;A0A8I6YSZ9
GO:0000076	DNA replication checkpoint	1	1	0.0610657	0.593933	A0A8I6WDS1
GO:0000389	mRNA 3'-splice site recognition	1	1	0.0610657	0.593933	F2D0F3
GO:0001709	cell fate determination	1	1	0.0610657	0.593933	A0A8I6Z1P9
GO:0002191	cap-dependent translational initiation	1	1	0.0610657	0.593933	A0A8I6W8C2
GO:0003015	heart process	1	1	0.0610657	0.593933	A0A8I6XBH2
GO:0003254	regulation of membrane depolarization	1	1	0.0610657	0.593933	A0A8I6XBH2
GO:0006592	ornithine biosynthetic process	1	1	0.0610657	0.593933	F2CW53
GO:0006751	glutathione catabolic process	1	1	0.0610657	0.593933	A0A8I6WVD2
GO:0006788	heme oxidation	1	1	0.0610657	0.593933	F2DC91
GO:0008333	endosome to lysosome transport	1	1	0.0610657	0.593933	F2DP42
GO:0009268	response to pH	1	1	0.0610657	0.593933	F2DMU4
GO:0009886	post-embryonic morphogenesis	1	1	0.0610657	0.593933	F2CXD7
GO:0010024	phytochromobilin biosynthetic process	1	1	0.0610657	0.593933	F2DC91
GO:0010162	seed dormancy process	1	1	0.0610657	0.593933	A0A8I6YNS5
GO:0010446	response to alkaline pH	1	1	0.0610657	0.593933	F2DMU4
GO:0019221	cytokine-mediated signaling pathway	1	1	0.0610657	0.593933	A0A8I6WTG0
GO:0019353	protoporphyrinogen IX biosynthetic process from glutamate	1	1	0.0610657	0.593933	F2DG56
GO:0022417	protein maturation by protein folding	1	1	0.0610657	0.593933	F2CXT5
GO:0022611	dormancy process	1	1	0.0610657	0.593933	A0A8I6YNS5
GO:0031331	positive regulation of cellular catabolic process	1	1	0.0610657	0.593933	A0A8I6X7E0
GO:0032436	positive regulation of proteasomal ubiquitin-dependent protein catabolic process	1	1	0.0610657	0.593933	A0A8I6X7E0
GO:0033314	mitotic DNA replication checkpoint	1	1	0.0610657	0.593933	A0A8I6WDS1
GO:0033526	tetrapyrrole biosynthetic process from glutamate	1	1	0.0610657	0.593933	F2DG56
GO:0035621	ER to Golgi ceramide transport	1	1	0.0610657	0.593933	F2DGM5
GO:0038158	granulocyte colony-stimulating factor signaling pathway	1	1	0.0610657	0.593933	A0A8I6WTG0
GO:0042391	regulation of membrane potential	1	1	0.0610657	0.593933	A0A8I6XBH2
GO:0045165	cell fate commitment	1	1	0.0610657	0.593933	A0A8I6Z1P9
GO:0045862	positive regulation of proteolysis	1	1	0.0610657	0.593933	A0A8I6X7E0
GO:0046950	cellular ketone body metabolic process	1	1	0.0610657	0.593933	A0A8I6WR80
GO:0046951	ketone body biosynthetic process	1	1	0.0610657	0.593933	A0A8I6WR80
GO:0048317	seed morphogenesis	1	1	0.0610657	0.593933	F2CXD7
GO:0051016	barbed-end actin filament capping	1	1	0.0610657	0.593933	A0A287MLU2
GO:0051202	phytochromobilin metabolic process	1	1	0.0610657	0.593933	F2DC91
GO:0051899	membrane depolarization	1	1	0.0610657	0.593933	A0A8I6XBH2
GO:0060047	heart contraction	1	1	0.0610657	0.593933	A0A8I6XBH2
GO:0071763	nuclear membrane organization	1	1	0.0610657	0.593933	F2E1R5
GO:1901800	positive regulation of proteasomal protein catabolic process	1	1	0.0610657	0.593933	A0A8I6X7E0
GO:1902224	ketone body metabolic process	1	1	0.0610657	0.593933	A0A8I6WR80
GO:1903052	positive regulation of proteolysis involved in cellular protein catabolic process	1	1	0.0610657	0.593933	A0A8I6X7E0
GO:1903364	positive regulation of cellular protein catabolic process	1	1	0.0610657	0.593933	A0A8I6X7E0
GO:0051649	establishment of localization in cell	26	315	0.0618705	0.593933	A0A8I6WUP0;A0A8I6XAI2;A0A8I6XBH2;A0A8I6XLR3;A0A8I6Y8G3;A0A8I6YEZ5;A0A8I6YLU5;A0A8I6YM43;A0A8I7B4D8;A0A8I7B5C4;F2CXD7;F2CXT5;F2D2Z9;F2D4G9;F2D5K0;F2DA66;F2DGM5;F2DKP3;F2DP42;F2DVU1;F2E1R5;F2E7F7;F2EEJ9;M0W534;M0WNW4;M0WWJ8
GO:0009967	positive regulation of signal transduction	2	7	0.0635286	0.593933	A0A8I6X7E0;F2DVU1
GO:0010257	NADH dehydrogenase complex assembly	2	7	0.0635286	0.593933	A0A8I6X3I3;F2DNJ1
GO:0010647	positive regulation of cell communication	2	7	0.0635286	0.593933	A0A8I6X7E0;F2DVU1
GO:0023056	positive regulation of signaling	2	7	0.0635286	0.593933	A0A8I6X7E0;F2DVU1
GO:0030162	regulation of proteolysis	2	7	0.0635286	0.593933	A0A8I6WAU3;A0A8I6X7E0
GO:0032981	mitochondrial respiratory chain complex I assembly	2	7	0.0635286	0.593933	A0A8I6X3I3;F2DNJ1
GO:0046916	cellular transition metal ion homeostasis	2	7	0.0635286	0.593933	A0A8I6XZU9;A0A8I7B0Y3
GO:0055076	transition metal ion homeostasis	2	7	0.0635286	0.593933	A0A8I6XZU9;A0A8I7B0Y3
GO:0097031	mitochondrial respiratory chain complex I biogenesis	2	7	0.0635286	0.593933	A0A8I6X3I3;F2DNJ1
GO:0009725	response to hormone	7	59	0.0649982	0.601993	A0A067YHQ4;A0A8I6WXW1;A0A8I6XJ52;A0A8I7B3E2;A3RHH8;Q9SBI7;T1TD43
GO:0065007	biological regulation	31	390	0.0658167	0.603357	A0A287H6P9;A0A287MLU2;A0A7S9YWD1;A0A8I6WAU3;A0A8I6WDS1;A0A8I6WHE5;A0A8I6WTG0;A0A8I6WXW1;A0A8I6X7E0;A0A8I6XBH2;A0A8I6XEF6;A0A8I6XJ52;A0A8I6XZU9;A0A8I6YL06;A0A8I6YSZ9;A0A8I6Z0S4;A0A8I6Z9Z3;A0A8I7B0Y3;A0A8I7B2U1;A1X810;F2D3D5;F2DH88;F2DVU1;F2DXG7;F2E5J1;F2EGN2;F2EJZ7;M0W534;M0WTN6;P33044;Q673G6
GO:0051641	cellular localization	27	333	0.0689761	0.603357	A0A8I6WUP0;A0A8I6XAI2;A0A8I6XBH2;A0A8I6XLR3;A0A8I6XZU9;A0A8I6Y8G3;A0A8I6YEZ5;A0A8I6YLU5;A0A8I6YM43;A0A8I7B4D8;A0A8I7B5C4;F2CXD7;F2CXT5;F2D2Z9;F2D4G9;F2D5K0;F2DA66;F2DGM5;F2DKP3;F2DP42;F2DVU1;F2E1R5;F2E7F7;F2EEJ9;M0W534;M0WNW4;M0WWJ8
GO:0042592	homeostatic process	6	48	0.0689875	0.603357	A0A7S9YWD1;A0A8I6WHE5;A0A8I6XBH2;A0A8I6XZU9;A0A8I7B0Y3;F2E5J1
GO:1902582	single-organism intracellular transport	22	261	0.0690644	0.603357	A0A8I6WUP0;A0A8I6XAI2;A0A8I6XBH2;A0A8I6XLR3;A0A8I6Y8G3;A0A8I6YLU5;A0A8I6YM43;A0A8I7B4D8;A0A8I7B5C4;F2CXD7;F2CXT5;F2D2Z9;F2D4G9;F2D5K0;F2DA66;F2DGM5;F2DP42;F2DVU1;F2E1R5;F2E7F7;F2EEJ9;M0WWJ8
GO:0009719	response to endogenous stimulus	7	60	0.0699721	0.603357	A0A067YHQ4;A0A8I6WXW1;A0A8I6XJ52;A0A8I7B3E2;A3RHH8;Q9SBI7;T1TD43
GO:0046907	intracellular transport	25	305	0.0711812	0.603357	A0A8I6WUP0;A0A8I6XAI2;A0A8I6XBH2;A0A8I6XLR3;A0A8I6Y8G3;A0A8I6YEZ5;A0A8I6YLU5;A0A8I6YM43;A0A8I7B4D8;A0A8I7B5C4;F2CXD7;F2CXT5;F2D2Z9;F2D4G9;F2D5K0;F2DA66;F2DGM5;F2DKP3;F2DP42;F2DVU1;F2E1R5;F2E7F7;F2EEJ9;M0WNW4;M0WWJ8
GO:0050789	regulation of biological process	26	320	0.0722879	0.603357	A0A287H6P9;A0A287MLU2;A0A7S9YWD1;A0A8I6WAU3;A0A8I6WDS1;A0A8I6WHE5;A0A8I6WTG0;A0A8I6WXW1;A0A8I6X7E0;A0A8I6XBH2;A0A8I6XEF6;A0A8I6XJ52;A0A8I6YL06;A0A8I6YSZ9;A0A8I6Z0S4;A0A8I6Z9Z3;A1X810;F2D3D5;F2DH88;F2DVU1;F2DXG7;F2E5J1;F2EJZ7;M0W534;M0WTN6;Q673G6
GO:0050794	regulation of cellular process	23	277	0.0730693	0.603357	A0A287H6P9;A0A287MLU2;A0A7S9YWD1;A0A8I6WAU3;A0A8I6WDS1;A0A8I6WHE5;A0A8I6WTG0;A0A8I6WXW1;A0A8I6X7E0;A0A8I6XBH2;A0A8I6XEF6;A0A8I6XJ52;A0A8I6YL06;A0A8I6YSZ9;A0A8I6Z0S4;A0A8I6Z9Z3;A1X810;F2DH88;F2DVU1;F2DXG7;F2E5J1;F2EJZ7;M0W534
GO:0009628	response to abiotic stimulus	12	126	0.0792524	0.603357	A0A067YHQ4;A0A8I6WYH3;A0A8I6XKT3;A3RHH8;F2CXD7;F2DMU4;F2E0G2;F2EGN2;Q673G6;Q7XZK3;Q9SBI7;T1TD43
GO:0003006	developmental process involved in reproduction	6	50	0.0809355	0.603357	A0A8I6WXG8;A0A8I6YNS5;F2CXD7;F2DZK3;M0WWJ8;Q673G6
GO:0006120	mitochondrial electron transport, NADH to ubiquinone	2	8	0.0813838	0.603357	A0A8I6XKQ4;F2DNJ1
GO:0009065	glutamine family amino acid catabolic process	2	8	0.0813838	0.603357	F2DMU4;Q5EXM3
GO:0031329	regulation of cellular catabolic process	2	8	0.0813838	0.603357	A0A8I6WAU3;A0A8I6X7E0
GO:0042742	defense response to bacterium	2	8	0.0813838	0.603357	A0A287H6P9;F2DGM5
GO:0043649	dicarboxylic acid catabolic process	2	8	0.0813838	0.603357	F2DMU4;Q5EXM3
GO:0033036	macromolecule localization	26	325	0.0838804	0.603357	A0A287LRJ1;A0A8I6WUP0;A0A8I6XAI2;A0A8I6XBH2;A0A8I6XQT6;A0A8I6Y8G3;A0A8I6YEZ5;A0A8I6YLU5;A0A8I6YM43;A0A8I6Z597;A0A8I7B4D8;A0A8I7B5C4;F2CXD7;F2CXT5;F2D4G9;F2D9P7;F2D9V7;F2DGM5;F2DKP3;F2DP42;F2DVU1;F2E1R5;F2E7F7;F2EEJ9;M0W534;Q5UNP2
GO:0044702	single organism reproductive process	5	39	0.0856273	0.603357	A0A8I6WXG8;A0A8I6YNS5;F2CXD7;F2DZK3;Q673G6
GO:0032268	regulation of cellular protein metabolic process	6	51	0.0873189	0.603357	A0A8I6WAU3;A0A8I6X7E0;A0A8I6XEF6;A0A8I6Z9Z3;F2DH88;F2DVU1
GO:0006511	ubiquitin-dependent protein catabolic process	10	102	0.0895524	0.603357	A0A8I6WAU3;A0A8I6X7E0;A0A8I6XAI2;A0A8I6XEP7;A0A8I6Y2P0;A0A8I7B5C4;A0A8I7B601;F2CQ10;F2D894;F2E3Y1
GO:0009266	response to temperature stimulus	9	91	0.0999301	0.603357	A0A067YHQ4;A0A8I6WYH3;A3RHH8;F2DMU4;F2E0G2;F2EGN2;Q7XZK3;Q9SBI7;T1TD43
GO:0042168	heme metabolic process	2	9	0.100556	0.603357	F2DC91;F2DG56
GO:0019725	cellular homeostasis	5	41	0.101254	0.603357	A0A7S9YWD1;A0A8I6WHE5;A0A8I6XZU9;A0A8I7B0Y3;F2E5J1
GO:0016482	cytoplasmic transport	18	216	0.103542	0.603357	A0A8I6XAI2;A0A8I6XBH2;A0A8I6Y8G3;A0A8I6YEZ5;A0A8I6YLU5;A0A8I7B4D8;A0A8I7B5C4;F2CXT5;F2D2Z9;F2D4G9;F2DA66;F2DP42;F2DVU1;F2E1R5;F2E7F7;F2EEJ9;M0WNW4;M0WWJ8
GO:0006979	response to oxidative stress	8	80	0.11157	0.603357	A0A7S9YWD1;A0A8I6WHE5;A0A8I6WYH3;F2CTU5;F2CV55;F2CZC9;F2E5J1;Q7XZK3
GO:0000077	DNA damage checkpoint	1	2	0.118425	0.603357	A0A8I6WDS1
GO:0000350	generation of catalytic spliceosome for second transesterification step	1	2	0.118425	0.603357	F2D0F3
GO:0001906	cell killing	1	2	0.118425	0.603357	P33044
GO:0003008	system process	1	2	0.118425	0.603357	A0A8I6XBH2
GO:0003013	circulatory system process	1	2	0.118425	0.603357	A0A8I6XBH2
GO:0005980	glycogen catabolic process	1	2	0.118425	0.603357	F2E0G2
GO:0006368	transcription elongation from RNA polymerase II promoter	1	2	0.118425	0.603357	F2EJZ7
GO:0006567	threonine catabolic process	1	2	0.118425	0.603357	A0A8I6XC32
GO:0006787	porphyrin-containing compound catabolic process	1	2	0.118425	0.603357	F2DC91
GO:0006880	intracellular sequestering of iron ion	1	2	0.118425	0.603357	A0A8I6XZU9
GO:0007254	JNK cascade	1	2	0.118425	0.603357	F2DVU1
GO:0008015	blood circulation	1	2	0.118425	0.603357	A0A8I6XBH2
GO:0009735	response to cytokinin	1	2	0.118425	0.603357	A0A8I6WXW1
GO:0009736	cytokinin-activated signaling pathway	1	2	0.118425	0.603357	A0A8I6WXW1
GO:0009896	positive regulation of catabolic process	1	2	0.118425	0.603357	A0A8I6X7E0
GO:0010411	xyloglucan metabolic process	1	2	0.118425	0.603357	F2D903
GO:0010431	seed maturation	1	2	0.118425	0.603357	A0A8I6YNS5
GO:0010496	intercellular transport	1	2	0.118425	0.603357	Q7XZK3
GO:0010497	plasmodesmata-mediated intercellular transport	1	2	0.118425	0.603357	Q7XZK3
GO:0010972	negative regulation of G2/M transition of mitotic cell cycle	1	2	0.118425	0.603357	A0A8I6WDS1
GO:0015850	organic hydroxy compound transport	1	2	0.118425	0.603357	A0A8I6YM43
GO:0015918	sterol transport	1	2	0.118425	0.603357	A0A8I6YM43
GO:0019287	isopentenyl diphosphate biosynthetic process, mevalonate pathway	1	2	0.118425	0.603357	A0A8I7BFL1
GO:0030178	negative regulation of Wnt signaling pathway	1	2	0.118425	0.603357	F2DVU1
GO:0031570	DNA integrity checkpoint	1	2	0.118425	0.603357	A0A8I6WDS1
GO:0031640	killing of cells of other organism	1	2	0.118425	0.603357	P33044
GO:0032366	intracellular sterol transport	1	2	0.118425	0.603357	A0A8I6YM43
GO:0032844	regulation of homeostatic process	1	2	0.118425	0.603357	A0A8I6XBH2
GO:0032874	positive regulation of stress-activated MAPK cascade	1	2	0.118425	0.603357	F2DVU1
GO:0033015	tetrapyrrole catabolic process	1	2	0.118425	0.603357	F2DC91
GO:0033120	positive regulation of RNA splicing	1	2	0.118425	0.603357	A0A8I6YSZ9
GO:0034097	response to cytokine	1	2	0.118425	0.603357	A0A8I6WTG0
GO:0034243	regulation of transcription elongation from RNA polymerase II promoter	1	2	0.118425	0.603357	F2EJZ7
GO:0035627	ceramide transport	1	2	0.118425	0.603357	F2DGM5
GO:0035821	modification of morphology or physiology of other organism	1	2	0.118425	0.603357	P33044
GO:0042219	cellular modified amino acid catabolic process	1	2	0.118425	0.603357	A0A8I6WVD2
GO:0042886	amide transport	1	2	0.118425	0.603357	F2DGM5
GO:0043410	positive regulation of MAPK cascade	1	2	0.118425	0.603357	F2DVU1
GO:0044273	sulfur compound catabolic process	1	2	0.118425	0.603357	A0A8I6WVD2
GO:0044364	disruption of cells of other organism	1	2	0.118425	0.603357	P33044
GO:0044773	mitotic DNA damage checkpoint	1	2	0.118425	0.603357	A0A8I6WDS1
GO:0044774	mitotic DNA integrity checkpoint	1	2	0.118425	0.603357	A0A8I6WDS1
GO:0044818	mitotic G2/M transition checkpoint	1	2	0.118425	0.603357	A0A8I6WDS1
GO:0045041	protein import into mitochondrial intermembrane space	1	2	0.118425	0.603357	F2CXT5
GO:0045732	positive regulation of protein catabolic process	1	2	0.118425	0.603357	A0A8I6X7E0
GO:0046328	regulation of JNK cascade	1	2	0.118425	0.603357	F2DVU1
GO:0046330	positive regulation of JNK cascade	1	2	0.118425	0.603357	F2DVU1
GO:0046656	folic acid biosynthetic process	1	2	0.118425	0.603357	F2DYM4
GO:0048026	positive regulation of mRNA splicing, via spliceosome	1	2	0.118425	0.603357	A0A8I6YSZ9
GO:0050685	positive regulation of mRNA processing	1	2	0.118425	0.603357	A0A8I6YSZ9
GO:0051187	cofactor catabolic process	1	2	0.118425	0.603357	F2DC91
GO:0070304	positive regulation of stress-activated protein kinase signaling cascade	1	2	0.118425	0.603357	F2DVU1
GO:0071345	cellular response to cytokine stimulus	1	2	0.118425	0.603357	A0A8I6WTG0
GO:0071368	cellular response to cytokinin stimulus	1	2	0.118425	0.603357	A0A8I6WXW1
GO:0090090	negative regulation of canonical Wnt signaling pathway	1	2	0.118425	0.603357	F2DVU1
GO:0097577	sequestering of iron ion	1	2	0.118425	0.603357	A0A8I6XZU9
GO:1902750	negative regulation of cell cycle G2/M phase transition	1	2	0.118425	0.603357	A0A8I6WDS1
GO:1903189	glyoxal metabolic process	1	2	0.118425	0.603357	F2CUF4
GO:1903313	positive regulation of mRNA metabolic process	1	2	0.118425	0.603357	A0A8I6YSZ9
GO:2000021	regulation of ion homeostasis	1	2	0.118425	0.603357	A0A8I6XBH2
GO:0019941	modification-dependent protein catabolic process	10	108	0.119441	0.603357	A0A8I6WAU3;A0A8I6X7E0;A0A8I6XAI2;A0A8I6XEP7;A0A8I6Y2P0;A0A8I7B5C4;A0A8I7B601;F2CQ10;F2D894;F2E3Y1
GO:0006620	posttranslational protein targeting to membrane	2	10	0.120819	0.603357	A0A8I7B4D8;F2D4G9
GO:0007029	endoplasmic reticulum organization	2	10	0.120819	0.603357	A0A8I6WTG0;A0A8I6YDV3
GO:0009617	response to bacterium	2	10	0.120819	0.603357	A0A287H6P9;F2DGM5
GO:0042176	regulation of protein catabolic process	2	10	0.120819	0.603357	A0A8I6WAU3;A0A8I6X7E0
GO:0043328	protein targeting to vacuole involved in ubiquitin-dependent protein catabolic process via the multivesicular body sorting pathway	2	10	0.120819	0.603357	A0A8I6XAI2;A0A8I7B5C4
GO:0051254	positive regulation of RNA metabolic process	2	10	0.120819	0.603357	A0A287H6P9;A0A8I6YSZ9
GO:0043632	modification-dependent macromolecule catabolic process	10	109	0.124909	0.603357	A0A8I6WAU3;A0A8I6X7E0;A0A8I6XAI2;A0A8I6XEP7;A0A8I6Y2P0;A0A8I7B5C4;A0A8I7B601;F2CQ10;F2D894;F2E3Y1
GO:0065008	regulation of biological quality	10	109	0.124909	0.603357	A0A287MLU2;A0A7S9YWD1;A0A8I6WHE5;A0A8I6XBH2;A0A8I6XZU9;A0A8I7B0Y3;A0A8I7B2U1;F2E5J1;F2EGN2;P33044
GO:0006952	defense response	7	70	0.131783	0.603357	A0A287H6P9;A0A8I6X488;A0A8I6YSV4;A0A8I6Z9Z3;F2DGM5;F2E5X4;P33044
GO:0048519	negative regulation of biological process	7	70	0.131783	0.603357	A0A287MLU2;A0A8I6WDS1;A0A8I6YL06;A0A8I6Z9Z3;F2DH88;F2DVU1;M0WTN6
GO:0048608	reproductive structure development	5	45	0.136411	0.603357	A0A8I6WXG8;A0A8I6YNS5;F2CXD7;F2DZK3;Q673G6
GO:0061458	reproductive system development	5	45	0.136411	0.603357	A0A8I6WXG8;A0A8I6YNS5;F2CXD7;F2DZK3;Q673G6
GO:0051246	regulation of protein metabolic process	6	58	0.139329	0.603357	A0A8I6WAU3;A0A8I6X7E0;A0A8I6XEF6;A0A8I6Z9Z3;F2DH88;F2DVU1
GO:0010557	positive regulation of macromolecule biosynthetic process	2	11	0.141971	0.603357	A0A287H6P9;A0A8I6XEF6
GO:0031328	positive regulation of cellular biosynthetic process	2	11	0.141971	0.603357	A0A287H6P9;A0A8I6XEF6
GO:0048518	positive regulation of biological process	5	46	0.145956	0.603357	A0A287H6P9;A0A8I6X7E0;A0A8I6XEF6;A0A8I6YSZ9;F2DVU1
GO:0042775	mitochondrial ATP synthesis coupled electron transport	3	22	0.147222	0.603357	A0A8I6XKQ4;F2DNJ1;F2E2B0
GO:0022414	reproductive process	6	59	0.147743	0.603357	A0A8I6WXG8;A0A8I6YNS5;F2CXD7;F2DZK3;M0WWJ8;Q673G6
GO:0016192	vesicle-mediated transport	14	171	0.155649	0.603357	A0A8I6WTG0;A0A8I6WUP0;A0A8I6X7E0;A0A8I6XLR3;A0A8I6Y8G3;F2D2Z9;F2D9P7;F2DA66;F2DKP3;F2E376;F2E7F7;F2EEJ9;M0W534;M0WWJ8
GO:0000003	reproduction	6	60	0.156385	0.603357	A0A8I6WXG8;A0A8I6YNS5;F2CXD7;F2DZK3;M0WWJ8;Q673G6
GO:0050801	ion homeostasis	3	23	0.162148	0.603357	A0A8I6XBH2;A0A8I6XZU9;A0A8I7B0Y3
GO:0009891	positive regulation of biosynthetic process	2	12	0.16383	0.603357	A0A287H6P9;A0A8I6XEF6
GO:0031647	regulation of protein stability	2	12	0.16383	0.603357	A0A8I7B2U1;F2EGN2
GO:0033014	tetrapyrrole biosynthetic process	2	12	0.16383	0.603357	F2DC91;F2DG56
GO:0043162	ubiquitin-dependent protein catabolic process via the multivesicular body sorting pathway	2	12	0.16383	0.603357	A0A8I6XAI2;A0A8I7B5C4
GO:0045935	positive regulation of nucleobase-containing compound metabolic process	2	12	0.16383	0.603357	A0A287H6P9;A0A8I6YSZ9
GO:0048584	positive regulation of response to stimulus	2	12	0.16383	0.603357	A0A8I6X7E0;F2DVU1
GO:0048523	negative regulation of cellular process	6	61	0.165245	0.603357	A0A287MLU2;A0A8I6WDS1;A0A8I6YL06;A0A8I6Z9Z3;F2DH88;F2DVU1
GO:0000041	transition metal ion transport	1	3	0.172301	0.603357	A0A8I6XZU9
GO:0000075	cell cycle checkpoint	1	3	0.172301	0.603357	A0A8I6WDS1
GO:0000086	G2/M transition of mitotic cell cycle	1	3	0.172301	0.603357	A0A8I6WDS1
GO:0000165	MAPK cascade	1	3	0.172301	0.603357	F2DVU1
GO:0000393	spliceosomal conformational changes to generate catalytic conformation	1	3	0.172301	0.603357	F2D0F3
GO:0006225	UDP biosynthetic process	1	3	0.172301	0.603357	A0A287VZP8
GO:0006449	regulation of translational termination	1	3	0.172301	0.603357	A0A8I6XEF6
GO:0006552	leucine catabolic process	1	3	0.172301	0.603357	A0A8I6WR80
GO:0006591	ornithine metabolic process	1	3	0.172301	0.603357	F2CW53
GO:0006826	iron ion transport	1	3	0.172301	0.603357	A0A8I6XZU9
GO:0007093	mitotic cell cycle checkpoint	1	3	0.172301	0.603357	A0A8I6WDS1
GO:0008615	pyridoxine biosynthetic process	1	3	0.172301	0.603357	A0A8I6YBQ4
GO:0009188	ribonucleoside diphosphate biosynthetic process	1	3	0.172301	0.603357	A0A287VZP8
GO:0009193	pyrimidine ribonucleoside diphosphate metabolic process	1	3	0.172301	0.603357	A0A287VZP8
GO:0009194	pyrimidine ribonucleoside diphosphate biosynthetic process	1	3	0.172301	0.603357	A0A287VZP8
GO:0009269	response to desiccation	1	3	0.172301	0.603357	A0A8I6XKT3
GO:0009396	folic acid-containing compound biosynthetic process	1	3	0.172301	0.603357	F2DYM4
GO:0009615	response to virus	1	3	0.172301	0.603357	M0WNW4
GO:0009646	response to absence of light	1	3	0.172301	0.603357	F2CXD7
GO:0009845	seed germination	1	3	0.172301	0.603357	F2CXD7
GO:0010389	regulation of G2/M transition of mitotic cell cycle	1	3	0.172301	0.603357	A0A8I6WDS1
GO:0010948	negative regulation of cell cycle process	1	3	0.172301	0.603357	A0A8I6WDS1
GO:0023014	signal transduction by protein phosphorylation	1	3	0.172301	0.603357	F2DVU1
GO:0030091	protein repair	1	3	0.172301	0.603357	F2CZC9
GO:0030177	positive regulation of Wnt signaling pathway	1	3	0.172301	0.603357	A0A8I6X7E0
GO:0030834	regulation of actin filament depolymerization	1	3	0.172301	0.603357	A0A287MLU2
GO:0030835	negative regulation of actin filament depolymerization	1	3	0.172301	0.603357	A0A287MLU2
GO:0031098	stress-activated protein kinase signaling cascade	1	3	0.172301	0.603357	F2DVU1
GO:0032872	regulation of stress-activated MAPK cascade	1	3	0.172301	0.603357	F2DVU1
GO:0034250	positive regulation of cellular amide metabolic process	1	3	0.172301	0.603357	A0A8I6XEF6
GO:0034762	regulation of transmembrane transport	1	3	0.172301	0.603357	F2DXG7
GO:0034765	regulation of ion transmembrane transport	1	3	0.172301	0.603357	F2DXG7
GO:0042256	mature ribosome assembly	1	3	0.172301	0.603357	F2D179
GO:0042559	pteridine-containing compound biosynthetic process	1	3	0.172301	0.603357	F2DYM4
GO:0042752	regulation of circadian rhythm	1	3	0.172301	0.603357	A0A8I6X7E0
GO:0042819	vitamin B6 biosynthetic process	1	3	0.172301	0.603357	A0A8I6YBQ4
GO:0043242	negative regulation of protein complex disassembly	1	3	0.172301	0.603357	A0A287MLU2
GO:0043243	positive regulation of protein complex disassembly	1	3	0.172301	0.603357	A0A8I6XEF6
GO:0043269	regulation of ion transport	1	3	0.172301	0.603357	F2DXG7
GO:0043408	regulation of MAPK cascade	1	3	0.172301	0.603357	F2DVU1
GO:0044839	cell cycle G2/M phase transition	1	3	0.172301	0.603357	A0A8I6WDS1
GO:0045727	positive regulation of translation	1	3	0.172301	0.603357	A0A8I6XEF6
GO:0045786	negative regulation of cell cycle	1	3	0.172301	0.603357	A0A8I6WDS1
GO:0045901	positive regulation of translational elongation	1	3	0.172301	0.603357	A0A8I6XEF6
GO:0045905	positive regulation of translational termination	1	3	0.172301	0.603357	A0A8I6XEF6
GO:0045930	negative regulation of mitotic cell cycle	1	3	0.172301	0.603357	A0A8I6WDS1
GO:0046048	UDP metabolic process	1	3	0.172301	0.603357	A0A287VZP8
GO:0046704	CDP metabolic process	1	3	0.172301	0.603357	A0A287VZP8
GO:0046705	CDP biosynthetic process	1	3	0.172301	0.603357	A0A287VZP8
GO:0048609	multicellular organismal reproductive process	1	3	0.172301	0.603357	A0A8I6YNS5
GO:0051014	actin filament severing	1	3	0.172301	0.603357	A0A287MLU2
GO:0051225	spindle assembly	1	3	0.172301	0.603357	A0A8I6X7E0
GO:0051238	sequestering of metal ion	1	3	0.172301	0.603357	A0A8I6XZU9
GO:0051403	stress-activated MAPK cascade	1	3	0.172301	0.603357	F2DVU1
GO:0051693	actin filament capping	1	3	0.172301	0.603357	A0A287MLU2
GO:0070302	regulation of stress-activated protein kinase signaling cascade	1	3	0.172301	0.603357	F2DVU1
GO:0090263	positive regulation of canonical Wnt signaling pathway	1	3	0.172301	0.603357	A0A8I6X7E0
GO:0090351	seedling development	1	3	0.172301	0.603357	F2CXD7
GO:1901879	regulation of protein depolymerization	1	3	0.172301	0.603357	A0A287MLU2
GO:1901880	negative regulation of protein depolymerization	1	3	0.172301	0.603357	A0A287MLU2
GO:1901988	negative regulation of cell cycle phase transition	1	3	0.172301	0.603357	A0A8I6WDS1
GO:1901991	negative regulation of mitotic cell cycle phase transition	1	3	0.172301	0.603357	A0A8I6WDS1
GO:1902749	regulation of cell cycle G2/M phase transition	1	3	0.172301	0.603357	A0A8I6WDS1
GO:0042743	hydrogen peroxide metabolic process	4	36	0.173995	0.605014	A0A7S9YWD1;F2CTU5;F2CV55;F2E5J1
GO:0042744	hydrogen peroxide catabolic process	4	36	0.173995	0.605014	A0A7S9YWD1;F2CTU5;F2CV55;F2E5J1
GO:0019538	protein metabolic process	36	509	0.179726	0.622758	A0A8I6W8C2;A0A8I6WAU3;A0A8I6WYU4;A0A8I6X7E0;A0A8I6XAI2;A0A8I6XEF6;A0A8I6XEP7;A0A8I6XTS4;A0A8I6Y2P0;A0A8I6Y9I1;A0A8I6YMY2;A0A8I6Z9Z3;A0A8I7B2U1;A0A8I7B5C4;A0A8I7B601;A0A8I7BBJ7;F2CQ10;F2CQH9;F2CS15;F2CUI5;F2CXT5;F2CZC9;F2D811;F2D894;F2DGN5;F2DH88;F2DP42;F2DV56;F2DVU1;F2DVU2;F2DXD4;F2E3Y1;F2EAX5;F2ECK7;F2EG94;F2EIG1
GO:0044257	cellular protein catabolic process	11	133	0.184847	0.62968	A0A8I6WAU3;A0A8I6WYU4;A0A8I6X7E0;A0A8I6XAI2;A0A8I6XEP7;A0A8I6Y2P0;A0A8I7B5C4;A0A8I7B601;F2CQ10;F2D894;F2E3Y1
GO:0051603	proteolysis involved in cellular protein catabolic process	11	133	0.184847	0.62968	A0A8I6WAU3;A0A8I6WYU4;A0A8I6X7E0;A0A8I6XAI2;A0A8I6XEP7;A0A8I6Y2P0;A0A8I7B5C4;A0A8I7B601;F2CQ10;F2D894;F2E3Y1
GO:0006623	protein targeting to vacuole	2	13	0.186231	0.62968	A0A8I6XAI2;A0A8I7B5C4
GO:0009894	regulation of catabolic process	2	13	0.186231	0.62968	A0A8I6WAU3;A0A8I6X7E0
GO:0045934	negative regulation of nucleobase-containing compound metabolic process	2	13	0.186231	0.62968	A0A8I6YL06;F2DH88
GO:0072665	protein localization to vacuole	2	13	0.186231	0.62968	A0A8I6XAI2;A0A8I7B5C4
GO:0072666	establishment of protein localization to vacuole	2	13	0.186231	0.62968	A0A8I6XAI2;A0A8I7B5C4
GO:0051704	multi-organism process	5	50	0.186807	0.62968	A0A287H6P9;F2DGM5;M0WNW4;M0WWJ8;P33044
GO:0043207	response to external biotic stimulus	4	38	0.199151	0.666752	A0A287H6P9;F2DGM5;M0WNW4;P33044
GO:0051707	response to other organism	4	38	0.199151	0.666752	A0A287H6P9;F2DGM5;M0WNW4;P33044
GO:0006575	cellular modified amino acid metabolic process	6	65	0.202702	0.675528	A0A8I6WE67;A0A8I6WII2;A0A8I6WVD2;A0A8I6XBA4;A0A8I6Y5P8;F2DYM4
GO:0016310	phosphorylation	11	136	0.204485	0.675528	A0A287VZP8;A0A8I6WDR8;A0A8I6WXW1;A0A8I6XKQ4;A0A8I6Y1U6;A0A8I6YC32;A0A8I6Z0S4;F2DNJ1;F2DVU1;F2E2B0;F2E8P3
GO:0009605	response to external stimulus	5	52	0.208648	0.675528	A0A287H6P9;F2DGM5;F2DMU4;M0WNW4;P33044
GO:0051049	regulation of transport	2	14	0.209029	0.675528	F2DXG7;M0W534
GO:1901565	organonitrogen compound catabolic process	7	80	0.213382	0.675528	A0A8I6WR80;A0A8I6WVD2;A0A8I6XC32;A0A8I7B722;F2DC91;F2DMU4;Q5EXM3
GO:0009791	post-embryonic development	5	53	0.219872	0.675528	A0A8I6WXG8;A0A8I6YNS5;F2CXD7;F2DZK3;Q673G6
GO:0006354	DNA-templated transcription, elongation	1	4	0.222904	0.675528	F2EJZ7
GO:0006565	L-serine catabolic process	1	4	0.222904	0.675528	A0A8I6XC32
GO:0006904	vesicle docking involved in exocytosis	1	4	0.222904	0.675528	M0W534
GO:0007041	lysosomal transport	1	4	0.222904	0.675528	F2DP42
GO:0008614	pyridoxine metabolic process	1	4	0.222904	0.675528	A0A8I6YBQ4
GO:0009133	nucleoside diphosphate biosynthetic process	1	4	0.222904	0.675528	A0A287VZP8
GO:0009138	pyrimidine nucleoside diphosphate metabolic process	1	4	0.222904	0.675528	A0A287VZP8
GO:0009139	pyrimidine nucleoside diphosphate biosynthetic process	1	4	0.222904	0.675528	A0A287VZP8
GO:0009751	response to salicylic acid	1	4	0.222904	0.675528	F2DGM5
GO:0010020	chloroplast fission	1	4	0.222904	0.675528	A0A8I6X0W8
GO:0016973	poly(A)+ mRNA export from nucleus	1	4	0.222904	0.675528	F2E1R5
GO:0017157	regulation of exocytosis	1	4	0.222904	0.675528	M0W534
GO:0030837	negative regulation of actin filament polymerization	1	4	0.222904	0.675528	A0A287MLU2
GO:0031333	negative regulation of protein complex assembly	1	4	0.222904	0.675528	A0A287MLU2
GO:0032272	negative regulation of protein polymerization	1	4	0.222904	0.675528	A0A287MLU2
GO:0032504	multicellular organism reproduction	1	4	0.222904	0.675528	A0A8I6YNS5
GO:0032784	regulation of DNA-templated transcription, elongation	1	4	0.222904	0.675528	F2EJZ7
GO:0042816	vitamin B6 metabolic process	1	4	0.222904	0.675528	A0A8I6YBQ4
GO:0043572	plastid fission	1	4	0.222904	0.675528	A0A8I6X0W8
GO:0051046	regulation of secretion	1	4	0.222904	0.675528	M0W534
GO:0051494	negative regulation of cytoskeleton organization	1	4	0.222904	0.675528	A0A287MLU2
GO:1901259	chloroplast rRNA processing	1	4	0.222904	0.675528	A0A8I6XD40
GO:1901987	regulation of cell cycle phase transition	1	4	0.222904	0.675528	A0A8I6WDS1
GO:1901990	regulation of mitotic cell cycle phase transition	1	4	0.222904	0.675528	A0A8I6WDS1
GO:1903530	regulation of secretion by cell	1	4	0.222904	0.675528	M0W534
GO:0030163	protein catabolic process	11	139	0.224998	0.675709	A0A8I6WAU3;A0A8I6WYU4;A0A8I6X7E0;A0A8I6XAI2;A0A8I6XEP7;A0A8I6Y2P0;A0A8I7B5C4;A0A8I7B601;F2CQ10;F2D894;F2E3Y1
GO:0072593	reactive oxygen species metabolic process	4	40	0.225331	0.675709	A0A7S9YWD1;F2CTU5;F2CV55;F2E5J1
GO:0006119	oxidative phosphorylation	3	27	0.225691	0.675709	A0A8I6XKQ4;F2DNJ1;F2E2B0
GO:0042773	ATP synthesis coupled electron transport	3	27	0.225691	0.675709	A0A8I6XKQ4;F2DNJ1;F2E2B0
GO:0006778	porphyrin-containing compound metabolic process	2	15	0.232092	0.686577	F2DC91;F2DG56
GO:0006875	cellular metal ion homeostasis	2	15	0.232092	0.686577	A0A8I6XZU9;A0A8I7B0Y3
GO:0033013	tetrapyrrole metabolic process	2	15	0.232092	0.686577	F2DC91;F2DG56
GO:0055065	metal ion homeostasis	2	15	0.232092	0.686577	A0A8I6XZU9;A0A8I7B0Y3
GO:0006508	proteolysis	17	230	0.23395	0.690015	A0A8I6WAU3;A0A8I6WYU4;A0A8I6X7E0;A0A8I6XAI2;A0A8I6XEP7;A0A8I6Y2P0;A0A8I6Y9I1;A0A8I6YMY2;A0A8I7B2U1;A0A8I7B5C4;A0A8I7B601;A0A8I7BBJ7;F2CQ10;F2D811;F2D894;F2DGN5;F2E3Y1
GO:0009064	glutamine family amino acid metabolic process	4	41	0.238745	0.702065	F2CW53;F2DG56;F2DMU4;Q5EXM3
GO:0006518	peptide metabolic process	18	247	0.243999	0.71276	A0A8I6W8C2;A0A8I6WE67;A0A8I6WII2;A0A8I6WVD2;A0A8I6XBA4;A0A8I6XEF6;A0A8I6Y5P8;A0A8I6Y9I1;A0A8I6Z9Z3;F2CS15;F2CUI5;F2DH88;F2DVU2;F2DXD4;F2EAX5;F2ECK7;F2EG94;F2EIG1
GO:0044248	cellular catabolic process	24	341	0.253034	0.71276	A0A7S9YWD1;A0A8I6WAU3;A0A8I6WR80;A0A8I6WVD2;A0A8I6WYU4;A0A8I6X7E0;A0A8I6XAI2;A0A8I6XC32;A0A8I6XEP7;A0A8I6Y2P0;A0A8I7B5C4;A0A8I7B601;A0A8I7B722;F2CQ10;F2CTU5;F2CV55;F2CXD7;F2D894;F2DC91;F2DMU4;F2E0G2;F2E3Y1;F2E5J1;Q5EXM3
GO:0042364	water-soluble vitamin biosynthetic process	2	16	0.255304	0.71276	A0A8I6YBQ4;F2DYM4
GO:0060255	regulation of macromolecule metabolic process	12	159	0.261181	0.71276	A0A287H6P9;A0A8I6WAU3;A0A8I6X7E0;A0A8I6XEF6;A0A8I6YL06;A0A8I6YSZ9;A0A8I6Z9Z3;F2D3D5;F2DH88;F2DVU1;F2EJZ7;M0WTN6
GO:0016050	vesicle organization	4	43	0.2661	0.71276	A0A8I6Y8G3;F2D2Z9;F2DA66;F2EEJ9
GO:1901606	alpha-amino acid catabolic process	4	43	0.2661	0.71276	A0A8I6WR80;A0A8I6XC32;F2DMU4;Q5EXM3
GO:0000160	phosphorelay signal transduction system	1	5	0.270432	0.71276	A0A8I6WXW1
GO:0001934	positive regulation of protein phosphorylation	1	5	0.270432	0.71276	F2DVU1
GO:0006123	mitochondrial electron transport, cytochrome c to oxygen	1	5	0.270432	0.71276	F2E2B0
GO:0006995	cellular response to nitrogen starvation	1	5	0.270432	0.71276	F2DMU4
GO:0006998	nuclear envelope organization	1	5	0.270432	0.71276	F2E1R5
GO:0008064	regulation of actin polymerization or depolymerization	1	5	0.270432	0.71276	A0A287MLU2
GO:0009240	isopentenyl diphosphate biosynthetic process	1	5	0.270432	0.71276	A0A8I7BFL1
GO:0009686	gibberellin biosynthetic process	1	5	0.270432	0.71276	Q673G6
GO:0009744	response to sucrose	1	5	0.270432	0.71276	F2CXD7
GO:0009826	unidimensional cell growth	1	5	0.270432	0.71276	Q673G6
GO:0010562	positive regulation of phosphorus metabolic process	1	5	0.270432	0.71276	F2DVU1
GO:0016102	diterpenoid biosynthetic process	1	5	0.270432	0.71276	Q673G6
GO:0030041	actin filament polymerization	1	5	0.270432	0.71276	A0A287MLU2
GO:0030832	regulation of actin filament length	1	5	0.270432	0.71276	A0A287MLU2
GO:0030833	regulation of actin filament polymerization	1	5	0.270432	0.71276	A0A287MLU2
GO:0031401	positive regulation of protein modification process	1	5	0.270432	0.71276	F2DVU1
GO:0032271	regulation of protein polymerization	1	5	0.270432	0.71276	A0A287MLU2
GO:0032956	regulation of actin cytoskeleton organization	1	5	0.270432	0.71276	A0A287MLU2
GO:0033260	nuclear DNA replication	1	5	0.270432	0.71276	A0A8I6WDS1
GO:0034285	response to disaccharide	1	5	0.270432	0.71276	F2CXD7
GO:0040008	regulation of growth	1	5	0.270432	0.71276	Q673G6
GO:0042327	positive regulation of phosphorylation	1	5	0.270432	0.71276	F2DVU1
GO:0043171	peptide catabolic process	1	5	0.270432	0.71276	A0A8I6WVD2
GO:0044786	cell cycle DNA replication	1	5	0.270432	0.71276	A0A8I6WDS1
GO:0045892	negative regulation of transcription, DNA-templated	1	5	0.270432	0.71276	F2DH88
GO:0045937	positive regulation of phosphate metabolic process	1	5	0.270432	0.71276	F2DVU1
GO:0046490	isopentenyl diphosphate metabolic process	1	5	0.270432	0.71276	A0A8I7BFL1
GO:0046655	folic acid metabolic process	1	5	0.270432	0.71276	F2DYM4
GO:0071569	protein ufmylation	1	5	0.270432	0.71276	A0A8I6WAU3
GO:0090158	endoplasmic reticulum membrane organization	1	5	0.270432	0.71276	A0A8I6YDV3
GO:1902533	positive regulation of intracellular signal transduction	1	5	0.270432	0.71276	F2DVU1
GO:1902679	negative regulation of RNA biosynthetic process	1	5	0.270432	0.71276	F2DH88
GO:1903507	negative regulation of nucleic acid-templated transcription	1	5	0.270432	0.71276	F2DH88
GO:0001732	formation of cytoplasmic translation initiation complex	2	17	0.278562	0.730303	A0A8I6W8C2;F2DXD4
GO:0033108	mitochondrial respiratory chain complex assembly	2	17	0.278562	0.730303	A0A8I6X3I3;F2DNJ1
GO:0002181	cytoplasmic translation	4	44	0.279994	0.732121	A0A8I6W8C2;F2CUI5;F2DXD4;F2EAX5
GO:0043603	cellular amide metabolic process	19	269	0.281225	0.733406	A0A8I6W8C2;A0A8I6WE67;A0A8I6WII2;A0A8I6WVD2;A0A8I6XBA4;A0A8I6XEF6;A0A8I6Y5P8;A0A8I6Y9I1;A0A8I6Z9Z3;F2CS15;F2CUI5;F2DH88;F2DVU2;F2DXD4;F2DYM4;F2EAX5;F2ECK7;F2EG94;F2EIG1
GO:0009607	response to biotic stimulus	4	45	0.294002	0.75419	A0A287H6P9;F2DGM5;M0WNW4;P33044
GO:0010605	negative regulation of macromolecule metabolic process	4	45	0.294002	0.75419	A0A8I6YL06;A0A8I6Z9Z3;F2DH88;M0WTN6
GO:0009110	vitamin biosynthetic process	2	18	0.301773	0.75419	A0A8I6YBQ4;F2DYM4
GO:0009793	embryo development ending in seed dormancy	2	18	0.301773	0.75419	A0A8I6WXG8;F2DZK3
GO:0032879	regulation of localization	2	18	0.301773	0.75419	F2DXG7;M0W534
GO:0009892	negative regulation of metabolic process	4	46	0.308102	0.75419	A0A8I6YL06;A0A8I6Z9Z3;F2DH88;M0WTN6
GO:0044267	cellular protein metabolic process	28	415	0.308591	0.75419	A0A8I6W8C2;A0A8I6WAU3;A0A8I6WYU4;A0A8I6X7E0;A0A8I6XAI2;A0A8I6XEF6;A0A8I6XEP7;A0A8I6XTS4;A0A8I6Y2P0;A0A8I6Z9Z3;A0A8I7B5C4;A0A8I7B601;F2CQ10;F2CQH9;F2CS15;F2CUI5;F2CZC9;F2D894;F2DH88;F2DV56;F2DVU1;F2DVU2;F2DXD4;F2E3Y1;F2EAX5;F2ECK7;F2EG94;F2EIG1
GO:0022904	respiratory electron transport chain	3	32	0.310223	0.75419	A0A8I6XKQ4;F2DNJ1;F2E2B0
GO:0001932	regulation of protein phosphorylation	1	6	0.31507	0.75419	F2DVU1
GO:0006102	isocitrate metabolic process	1	6	0.31507	0.75419	F2DS63
GO:0006301	postreplication repair	1	6	0.31507	0.75419	F2CQH9
GO:0006468	protein phosphorylation	1	6	0.31507	0.75419	F2DVU1
GO:0006566	threonine metabolic process	1	6	0.31507	0.75419	A0A8I6XC32
GO:0006782	protoporphyrinogen IX biosynthetic process	1	6	0.31507	0.75419	F2DG56
GO:0009642	response to light intensity	1	6	0.31507	0.75419	F2CXD7
GO:0009685	gibberellin metabolic process	1	6	0.31507	0.75419	Q673G6
GO:0009908	flower development	1	6	0.31507	0.75419	Q673G6
GO:0010639	negative regulation of organelle organization	1	6	0.31507	0.75419	A0A287MLU2
GO:0021700	developmental maturation	1	6	0.31507	0.75419	A0A8I6YNS5
GO:0031204	posttranslational protein targeting to membrane, translocation	1	6	0.31507	0.75419	F2D4G9
GO:0032535	regulation of cellular component size	1	6	0.31507	0.75419	A0A287MLU2
GO:0032970	regulation of actin filament-based process	1	6	0.31507	0.75419	A0A287MLU2
GO:0042325	regulation of phosphorylation	1	6	0.31507	0.75419	F2DVU1
GO:0043562	cellular response to nitrogen levels	1	6	0.31507	0.75419	F2DMU4
GO:0044770	cell cycle phase transition	1	6	0.31507	0.75419	A0A8I6WDS1
GO:0044772	mitotic cell cycle phase transition	1	6	0.31507	0.75419	A0A8I6WDS1
GO:0046487	glyoxylate metabolic process	1	6	0.31507	0.75419	F2CXD7
GO:0046501	protoporphyrinogen IX metabolic process	1	6	0.31507	0.75419	F2DG56
GO:0048868	pollen tube development	1	6	0.31507	0.75419	M0WWJ8
GO:0051129	negative regulation of cellular component organization	1	6	0.31507	0.75419	A0A287MLU2
GO:0051253	negative regulation of RNA metabolic process	1	6	0.31507	0.75419	F2DH88
GO:0051258	protein polymerization	1	6	0.31507	0.75419	A0A287MLU2
GO:0072525	pyridine-containing compound biosynthetic process	1	6	0.31507	0.75419	A0A8I6YBQ4
GO:0090066	regulation of anatomical structure size	1	6	0.31507	0.75419	A0A287MLU2
GO:0033554	cellular response to stress	10	137	0.324461	0.762877	A0A7S9YWD1;A0A8I6WAU3;A0A8I6WDS1;A0A8I6WHE5;F2CPT7;F2CQH9;F2DMU4;F2DVU1;F2E5J1;F2EGN2
GO:0000209	protein polyubiquitination	2	19	0.324858	0.762877	F2CQ10;F2CQH9
GO:0002183	cytoplasmic translational initiation	2	19	0.324858	0.762877	A0A8I6W8C2;F2DXD4
GO:0006906	vesicle fusion	2	19	0.324858	0.762877	A0A8I6Y8G3;F2EEJ9
GO:0008299	isoprenoid biosynthetic process	2	19	0.324858	0.762877	A0A8I7BFL1;Q673G6
GO:0009081	branched-chain amino acid metabolic process	2	19	0.324858	0.762877	A0A8I6WR80;A0A8I6XC32
GO:0009790	embryo development	2	19	0.324858	0.762877	A0A8I6WXG8;F2DZK3
GO:0034976	response to endoplasmic reticulum stress	2	19	0.324858	0.762877	A0A8I6WAU3;F2CPT7
GO:0098542	defense response to other organism	3	33	0.327385	0.766995	A0A287H6P9;F2DGM5;P33044
GO:0061024	membrane organization	8	108	0.337685	0.779364	A0A8I6Y8G3;A0A8I6YDV3;A0A8I7B4D8;F2D2Z9;F2D4G9;F2DA66;F2E1R5;F2EEJ9
GO:0080090	regulation of primary metabolic process	10	139	0.341128	0.779364	A0A287H6P9;A0A8I6WAU3;A0A8I6X7E0;A0A8I6XEF6;A0A8I6YL06;A0A8I6YSZ9;A0A8I6Z9Z3;F2DH88;F2DVU1;F2EJZ7
GO:0019222	regulation of metabolic process	12	170	0.34204	0.779364	A0A287H6P9;A0A8I6WAU3;A0A8I6X7E0;A0A8I6XEF6;A0A8I6YL06;A0A8I6YSZ9;A0A8I6Z9Z3;F2D3D5;F2DH88;F2DVU1;F2EJZ7;M0WTN6
GO:0048878	chemical homeostasis	3	34	0.344546	0.779364	A0A8I6XBH2;A0A8I6XZU9;A0A8I7B0Y3
GO:0009314	response to radiation	2	20	0.347745	0.779364	F2CXD7;Q673G6
GO:0009416	response to light stimulus	2	20	0.347745	0.779364	F2CXD7;Q673G6
GO:0031323	regulation of cellular metabolic process	10	140	0.349521	0.779364	A0A287H6P9;A0A8I6WAU3;A0A8I6X7E0;A0A8I6XEF6;A0A8I6YL06;A0A8I6YSZ9;A0A8I6Z9Z3;F2DH88;F2DVU1;F2EJZ7
GO:0032501	multicellular organismal process	7	94	0.349651	0.779364	A0A8I6WXG8;A0A8I6XBH2;A0A8I6YNS5;F2CXD7;F2DZK3;M0WWJ8;Q673G6
GO:0015031	protein transport	18	265	0.350431	0.779364	A0A287LRJ1;A0A8I6WUP0;A0A8I6XAI2;A0A8I6XBH2;A0A8I6Y8G3;A0A8I6YEZ5;A0A8I6YLU5;A0A8I7B4D8;A0A8I7B5C4;F2CXT5;F2D4G9;F2D9P7;F2DKP3;F2DP42;F2DVU1;F2E7F7;F2EEJ9;M0W534
GO:0009063	cellular amino acid catabolic process	4	49	0.350735	0.779364	A0A8I6WR80;A0A8I6XC32;F2DMU4;Q5EXM3
GO:0010608	posttranscriptional regulation of gene expression	4	49	0.350735	0.779364	A0A8I6XEF6;A0A8I6Z9Z3;F2DH88;M0WTN6
GO:0045184	establishment of protein localization	18	266	0.356675	0.779364	A0A287LRJ1;A0A8I6WUP0;A0A8I6XAI2;A0A8I6XBH2;A0A8I6Y8G3;A0A8I6YEZ5;A0A8I6YLU5;A0A8I7B4D8;A0A8I7B5C4;F2CXT5;F2D4G9;F2D9P7;F2DKP3;F2DP42;F2DVU1;F2E7F7;F2EEJ9;M0W534
GO:0000018	regulation of DNA recombination	1	7	0.356994	0.779364	A0A8I6YL06
GO:0006448	regulation of translational elongation	1	7	0.356994	0.779364	A0A8I6XEF6
GO:0006549	isoleucine metabolic process	1	7	0.356994	0.779364	A0A8I6XC32
GO:0006783	heme biosynthetic process	1	7	0.356994	0.779364	F2DG56
GO:0007623	circadian rhythm	1	7	0.356994	0.779364	A0A8I6X7E0
GO:0009068	aspartate family amino acid catabolic process	1	7	0.356994	0.779364	A0A8I6XC32
GO:0009083	branched-chain amino acid catabolic process	1	7	0.356994	0.779364	A0A8I6WR80
GO:0009097	isoleucine biosynthetic process	1	7	0.356994	0.779364	A0A8I6XC32
GO:0010564	regulation of cell cycle process	1	7	0.356994	0.779364	A0A8I6WDS1
GO:0016101	diterpenoid metabolic process	1	7	0.356994	0.779364	Q673G6
GO:0045910	negative regulation of DNA recombination	1	7	0.356994	0.779364	A0A8I6YL06
GO:0048511	rhythmic process	1	7	0.356994	0.779364	A0A8I6X7E0
GO:0051053	negative regulation of DNA metabolic process	1	7	0.356994	0.779364	A0A8I6YL06
GO:0051130	positive regulation of cellular component organization	1	7	0.356994	0.779364	A0A8I6XEF6
GO:0051493	regulation of cytoskeleton organization	1	7	0.356994	0.779364	A0A287MLU2
GO:0070534	protein K63-linked ubiquitination	1	7	0.356994	0.779364	F2CQH9
GO:0070973	protein localization to endoplasmic reticulum exit site	1	7	0.356994	0.779364	F2E7F7
GO:0090567	reproductive shoot system development	1	7	0.356994	0.779364	Q673G6
GO:0036211	protein modification process	7	95	0.359903	0.779364	A0A8I6WAU3;A0A8I6XTS4;F2CQ10;F2CQH9;F2DP42;F2DV56;F2DVU1
GO:0010629	negative regulation of gene expression	3	35	0.361673	0.779364	A0A8I6Z9Z3;F2DH88;M0WTN6
GO:0070972	protein localization to endoplasmic reticulum	3	35	0.361673	0.779364	A0A8I7B4D8;F2D4G9;F2E7F7
GO:0071705	nitrogen compound transport	3	35	0.361673	0.779364	A0A8I6YEZ5;F2DGM5;F2E1R5
GO:0006888	ER to Golgi vesicle-mediated transport	4	50	0.36499	0.779364	A0A8I6Y8G3;F2E7F7;F2EEJ9;M0WWJ8
GO:0051716	cellular response to stimulus	16	236	0.366512	0.779364	A0A7S9YWD1;A0A8I6WAU3;A0A8I6WDS1;A0A8I6WHE5;A0A8I6WTG0;A0A8I6WXW1;A0A8I6X7E0;A0A8I6XJ52;A0A8I6Z0S4;A1X810;F2CPT7;F2CQH9;F2DMU4;F2DVU1;F2E5J1;F2EGN2
GO:0044265	cellular macromolecule catabolic process	11	158	0.369878	0.779364	A0A8I6WAU3;A0A8I6WYU4;A0A8I6X7E0;A0A8I6XAI2;A0A8I6XEP7;A0A8I6Y2P0;A0A8I7B5C4;A0A8I7B601;F2CQ10;F2D894;F2E3Y1
GO:0006891	intra-Golgi vesicle-mediated transport	2	21	0.370373	0.779364	A0A8I6XLR3;F2EEJ9
GO:0043624	cellular protein complex disassembly	2	21	0.370373	0.779364	A0A287MLU2;A0A8I6XEF6
GO:0044036	cell wall macromolecule metabolic process	2	21	0.370373	0.779364	A0A8I7B722;F2D903
GO:0009185	ribonucleoside diphosphate metabolic process	3	36	0.378735	0.779364	A0A287VZP8;A0A8I6WDR8;A0A8I6YC32
GO:0007165	signal transduction	7	97	0.380483	0.779364	A0A8I6WTG0;A0A8I6WXW1;A0A8I6X7E0;A0A8I6XJ52;A0A8I6Z0S4;A1X810;F2DVU1
GO:0007154	cell communication	8	113	0.385345	0.779364	A0A8I6WTG0;A0A8I6WXW1;A0A8I6X7E0;A0A8I6XJ52;A0A8I6Z0S4;A1X810;F2DMU4;F2DVU1
GO:0006486	protein glycosylation	2	22	0.392688	0.779364	A0A8I6XTS4;F2DV56
GO:0006767	water-soluble vitamin metabolic process	2	22	0.392688	0.779364	A0A8I6YBQ4;F2DYM4
GO:0006873	cellular ion homeostasis	2	22	0.392688	0.779364	A0A8I6XZU9;A0A8I7B0Y3
GO:0009100	glycoprotein metabolic process	2	22	0.392688	0.779364	A0A8I6XTS4;F2DV56
GO:0009101	glycoprotein biosynthetic process	2	22	0.392688	0.779364	A0A8I6XTS4;F2DV56
GO:0009966	regulation of signal transduction	2	22	0.392688	0.779364	A0A8I6X7E0;F2DVU1
GO:0030003	cellular cation homeostasis	2	22	0.392688	0.779364	A0A8I6XZU9;A0A8I7B0Y3
GO:0043413	macromolecule glycosylation	2	22	0.392688	0.779364	A0A8I6XTS4;F2DV56
GO:0055080	cation homeostasis	2	22	0.392688	0.779364	A0A8I6XZU9;A0A8I7B0Y3
GO:0098771	inorganic ion homeostasis	2	22	0.392688	0.779364	A0A8I6XZU9;A0A8I7B0Y3
GO:0009132	nucleoside diphosphate metabolic process	3	37	0.395703	0.779364	A0A287VZP8;A0A8I6WDR8;A0A8I6YC32
GO:0051172	negative regulation of nitrogen compound metabolic process	3	37	0.395703	0.779364	A0A8I6YL06;A0A8I6Z9Z3;F2DH88
GO:0006376	mRNA splice site selection	1	8	0.396367	0.779364	F2D0F3
GO:0006551	leucine metabolic process	1	8	0.396367	0.779364	A0A8I6WR80
GO:0006563	L-serine metabolic process	1	8	0.396367	0.779364	A0A8I6XC32
GO:0006625	protein targeting to peroxisome	1	8	0.396367	0.779364	F2CXT5
GO:0007051	spindle organization	1	8	0.396367	0.779364	A0A8I6X7E0
GO:0009071	serine family amino acid catabolic process	1	8	0.396367	0.779364	A0A8I6XC32
GO:0009089	lysine biosynthetic process via diaminopimelate	1	8	0.396367	0.779364	A0A8I6XPB3
GO:0009267	cellular response to starvation	1	8	0.396367	0.779364	F2DMU4
GO:0009856	pollination	1	8	0.396367	0.779364	M0WWJ8
GO:0015995	chlorophyll biosynthetic process	1	8	0.396367	0.779364	F2DG56
GO:0019220	regulation of phosphate metabolic process	1	8	0.396367	0.779364	F2DVU1
GO:0030001	metal ion transport	1	8	0.396367	0.779364	A0A8I6XZU9
GO:0030261	chromosome condensation	1	8	0.396367	0.779364	A0A8I6YL06
GO:0031399	regulation of protein modification process	1	8	0.396367	0.779364	F2DVU1
GO:0042594	response to starvation	1	8	0.396367	0.779364	F2DMU4
GO:0043574	peroxisomal transport	1	8	0.396367	0.779364	F2CXT5
GO:0044706	multi-multicellular organism process	1	8	0.396367	0.779364	M0WWJ8
GO:0045893	positive regulation of transcription, DNA-templated	1	8	0.396367	0.779364	A0A287H6P9
GO:0046451	diaminopimelate metabolic process	1	8	0.396367	0.779364	A0A8I6XPB3
GO:0051174	regulation of phosphorus metabolic process	1	8	0.396367	0.779364	F2DVU1
GO:0060560	developmental growth involved in morphogenesis	1	8	0.396367	0.779364	Q673G6
GO:0072662	protein localization to peroxisome	1	8	0.396367	0.779364	F2CXT5
GO:0072663	establishment of protein localization to peroxisome	1	8	0.396367	0.779364	F2CXT5
GO:1902531	regulation of intracellular signal transduction	1	8	0.396367	0.779364	F2DVU1
GO:1902680	positive regulation of RNA biosynthetic process	1	8	0.396367	0.779364	A0A287H6P9
GO:1903508	positive regulation of nucleic acid-templated transcription	1	8	0.396367	0.779364	A0A287H6P9
GO:0044700	single organism signaling	7	99	0.401118	0.787144	A0A8I6WTG0;A0A8I6WXW1;A0A8I6X7E0;A0A8I6XJ52;A0A8I6Z0S4;A1X810;F2DVU1
GO:0006913	nucleocytoplasmic transport	4	53	0.407619	0.791738	A0A8I6XBH2;A0A8I6YEZ5;F2E1R5;M0WNW4
GO:0051169	nuclear transport	4	53	0.407619	0.791738	A0A8I6XBH2;A0A8I6YEZ5;F2E1R5;M0WNW4
GO:0023052	signaling	7	100	0.411437	0.791738	A0A8I6WTG0;A0A8I6WXW1;A0A8I6X7E0;A0A8I6XJ52;A0A8I6Z0S4;A1X810;F2DVU1
GO:0010256	endomembrane system organization	3	38	0.41255	0.791738	A0A8I6WTG0;A0A8I6YDV3;F2E1R5
GO:0046034	ATP metabolic process	5	69	0.414479	0.791738	A0A8I6WDR8;A0A8I6XKQ4;A0A8I6YC32;F2DNJ1;F2E2B0
GO:0006720	isoprenoid metabolic process	2	23	0.414644	0.791738	A0A8I7BFL1;Q673G6
GO:0034599	cellular response to oxidative stress	2	23	0.414644	0.791738	A0A8I6WHE5;F2E5J1
GO:0042440	pigment metabolic process	2	23	0.414644	0.791738	F2DC91;F2DG56
GO:0044801	single-organism membrane fusion	2	23	0.414644	0.791738	A0A8I6Y8G3;F2EEJ9
GO:0045047	protein targeting to ER	2	23	0.414644	0.791738	A0A8I7B4D8;F2D4G9
GO:0048284	organelle fusion	2	23	0.414644	0.791738	A0A8I6Y8G3;F2EEJ9
GO:0070085	glycosylation	2	23	0.414644	0.791738	A0A8I6XTS4;F2DV56
GO:0072599	establishment of protein localization to endoplasmic reticulum	2	23	0.414644	0.791738	A0A8I7B4D8;F2D4G9
GO:0090174	organelle membrane fusion	2	23	0.414644	0.791738	A0A8I6Y8G3;F2EEJ9
GO:0048193	Golgi vesicle transport	6	86	0.430029	0.801199	A0A8I6WUP0;A0A8I6XLR3;A0A8I6Y8G3;F2E7F7;F2EEJ9;M0WWJ8
GO:0006094	gluconeogenesis	1	9	0.433343	0.801199	A0A8I6WDR8
GO:0006207	'de novo' pyrimidine nucleobase biosynthetic process	1	9	0.433343	0.801199	A0A287VZP8
GO:0006415	translational termination	1	9	0.433343	0.801199	A0A8I6XEF6
GO:0006526	arginine biosynthetic process	1	9	0.433343	0.801199	F2CW53
GO:0006997	nucleus organization	1	9	0.433343	0.801199	F2E1R5
GO:0007346	regulation of mitotic cell cycle	1	9	0.433343	0.801199	A0A8I6WDS1
GO:0009085	lysine biosynthetic process	1	9	0.433343	0.801199	A0A8I6XPB3
GO:0009306	protein secretion	1	9	0.433343	0.801199	M0W534
GO:0016126	sterol biosynthetic process	1	9	0.433343	0.801199	A0A8I7BFL1
GO:0019319	hexose biosynthetic process	1	9	0.433343	0.801199	A0A8I6WDR8
GO:0030042	actin filament depolymerization	1	9	0.433343	0.801199	A0A287MLU2
GO:0031669	cellular response to nutrient levels	1	9	0.433343	0.801199	F2DMU4
GO:0035194	posttranscriptional gene silencing by RNA	1	9	0.433343	0.801199	M0WTN6
GO:0050821	protein stabilization	1	9	0.433343	0.801199	F2EGN2
GO:0060627	regulation of vesicle-mediated transport	1	9	0.433343	0.801199	M0W534
GO:0080135	regulation of cellular response to stress	1	9	0.433343	0.801199	F2DVU1
GO:0006766	vitamin metabolic process	2	24	0.436202	0.801996	A0A8I6YBQ4;F2DYM4
GO:0006900	membrane budding	2	24	0.436202	0.801996	F2D2Z9;F2DA66
GO:0010646	regulation of cell communication	2	24	0.436202	0.801996	A0A8I6X7E0;F2DVU1
GO:0022900	electron transport chain	3	40	0.445786	0.816588	A0A8I6XKQ4;F2DNJ1;F2E2B0
GO:0031324	negative regulation of cellular metabolic process	3	40	0.445786	0.816588	A0A8I6YL06;A0A8I6Z9Z3;F2DH88
GO:0023051	regulation of signaling	2	25	0.457328	0.829795	A0A8I6X7E0;F2DVU1
GO:0043241	protein complex disassembly	2	25	0.457328	0.829795	A0A287MLU2;A0A8I6XEF6
GO:0051028	mRNA transport	2	25	0.457328	0.829795	A0A8I6YEZ5;F2E1R5
GO:0061025	membrane fusion	2	25	0.457328	0.829795	A0A8I6Y8G3;F2EEJ9
GO:0006417	regulation of translation	3	41	0.462132	0.829795	A0A8I6XEF6;A0A8I6Z9Z3;F2DH88
GO:0034248	regulation of cellular amide metabolic process	3	41	0.462132	0.829795	A0A8I6XEF6;A0A8I6Z9Z3;F2DH88
GO:0008104	protein localization	18	283	0.46512	0.829795	A0A287LRJ1;A0A8I6WUP0;A0A8I6XAI2;A0A8I6XBH2;A0A8I6Y8G3;A0A8I6YEZ5;A0A8I6YLU5;A0A8I7B4D8;A0A8I7B5C4;F2CXT5;F2D4G9;F2D9P7;F2DKP3;F2DP42;F2DVU1;F2E7F7;F2EEJ9;M0W534
GO:0006694	steroid biosynthetic process	1	10	0.468068	0.829795	A0A8I7BFL1
GO:0010383	cell wall polysaccharide metabolic process	1	10	0.468068	0.829795	F2D903
GO:0010410	hemicellulose metabolic process	1	10	0.468068	0.829795	F2D903
GO:0015994	chlorophyll metabolic process	1	10	0.468068	0.829795	F2DG56
GO:0019856	pyrimidine nucleobase biosynthetic process	1	10	0.468068	0.829795	A0A287VZP8
GO:0031047	gene silencing by RNA	1	10	0.468068	0.829795	M0WTN6
GO:0031667	response to nutrient levels	1	10	0.468068	0.829795	F2DMU4
GO:0031668	cellular response to extracellular stimulus	1	10	0.468068	0.829795	F2DMU4
GO:0051261	protein depolymerization	1	10	0.468068	0.829795	A0A287MLU2
GO:0051726	regulation of cell cycle	1	10	0.468068	0.829795	A0A8I6WDS1
GO:0071496	cellular response to external stimulus	1	10	0.468068	0.829795	F2DMU4
GO:0033365	protein localization to organelle	8	122	0.471525	0.831108	A0A8I6XAI2;A0A8I6XBH2;A0A8I7B4D8;A0A8I7B5C4;F2CXT5;F2D4G9;F2DVU1;F2E7F7
GO:0009144	purine nucleoside triphosphate metabolic process	5	74	0.475865	0.831108	A0A8I6WDR8;A0A8I6XKQ4;A0A8I6YC32;F2DNJ1;F2E2B0
GO:0009205	purine ribonucleoside triphosphate metabolic process	5	74	0.475865	0.831108	A0A8I6WDR8;A0A8I6XKQ4;A0A8I6YC32;F2DNJ1;F2E2B0
GO:0048731	system development	5	74	0.475865	0.831108	A0A8I6WXG8;A0A8I6YNS5;F2CXD7;F2DZK3;Q673G6
GO:0043412	macromolecule modification	7	107	0.483091	0.831108	A0A8I6WAU3;A0A8I6XTS4;F2CQ10;F2CQH9;F2DP42;F2DV56;F2DVU1
GO:0072594	establishment of protein localization to organelle	7	107	0.483091	0.831108	A0A8I6XAI2;A0A8I6XBH2;A0A8I7B4D8;A0A8I7B5C4;F2CXT5;F2D4G9;F2DVU1
GO:0006464	cellular protein modification process	6	91	0.485378	0.831108	A0A8I6WAU3;A0A8I6XTS4;F2CQ10;F2CQH9;F2DV56;F2DVU1
GO:0006413	translational initiation	2	27	0.498179	0.831108	A0A8I6W8C2;F2DXD4
GO:0006612	protein targeting to membrane	2	27	0.498179	0.831108	A0A8I7B4D8;F2D4G9
GO:0022411	cellular component disassembly	2	27	0.498179	0.831108	A0A287MLU2;A0A8I6XEF6
GO:0032984	macromolecular complex disassembly	2	27	0.498179	0.831108	A0A287MLU2;A0A8I6XEF6
GO:0051128	regulation of cellular component organization	2	27	0.498179	0.831108	A0A287MLU2;A0A8I6XEF6
GO:0009199	ribonucleoside triphosphate metabolic process	5	76	0.499875	0.831108	A0A8I6WDR8;A0A8I6XKQ4;A0A8I6YC32;F2DNJ1;F2E2B0
GO:0070887	cellular response to chemical stimulus	5	76	0.499875	0.831108	A0A8I6WHE5;A0A8I6WTG0;A0A8I6WXW1;A0A8I6XJ52;F2E5J1
GO:0000245	spliceosomal complex assembly	1	11	0.500677	0.831108	F2D0F3
GO:0000902	cell morphogenesis	1	11	0.500677	0.831108	Q673G6
GO:0005977	glycogen metabolic process	1	11	0.500677	0.831108	F2E0G2
GO:0006026	aminoglycan catabolic process	1	11	0.500677	0.831108	A0A8I7B722
GO:0006030	chitin metabolic process	1	11	0.500677	0.831108	A0A8I7B722
GO:0006032	chitin catabolic process	1	11	0.500677	0.831108	A0A8I7B722
GO:0006108	malate metabolic process	1	11	0.500677	0.831108	A0A8I6WSL2
GO:0006112	energy reserve metabolic process	1	11	0.500677	0.831108	F2E0G2
GO:0006760	folic acid-containing compound metabolic process	1	11	0.500677	0.831108	F2DYM4
GO:0006779	porphyrin-containing compound biosynthetic process	1	11	0.500677	0.831108	F2DG56
GO:0008154	actin polymerization or depolymerization	1	11	0.500677	0.831108	A0A287MLU2
GO:0009743	response to carbohydrate	1	11	0.500677	0.831108	F2CXD7
GO:0009991	response to extracellular stimulus	1	11	0.500677	0.831108	F2DMU4
GO:0016049	cell growth	1	11	0.500677	0.831108	Q673G6
GO:0016441	posttranscriptional gene silencing	1	11	0.500677	0.831108	M0WTN6
GO:0016998	cell wall macromolecule catabolic process	1	11	0.500677	0.831108	A0A8I7B722
GO:0032989	cellular component morphogenesis	1	11	0.500677	0.831108	Q673G6
GO:0042558	pteridine-containing compound metabolic process	1	11	0.500677	0.831108	F2DYM4
GO:0046348	amino sugar catabolic process	1	11	0.500677	0.831108	A0A8I7B722
GO:0048024	regulation of mRNA splicing, via spliceosome	1	11	0.500677	0.831108	A0A8I6YSZ9
GO:0048589	developmental growth	1	11	0.500677	0.831108	Q673G6
GO:0051052	regulation of DNA metabolic process	1	11	0.500677	0.831108	A0A8I6YL06
GO:0051651	maintenance of location in cell	1	11	0.500677	0.831108	A0A8I6XZU9
GO:1901072	glucosamine-containing compound catabolic process	1	11	0.500677	0.831108	A0A8I7B722
GO:0006081	cellular aldehyde metabolic process	3	44	0.509854	0.832107	A0A8I6YIL8;F2CUF4;F2CXD7
GO:0007017	microtubule-based process	2	28	0.517862	0.832107	A0A8I6X0W8;A0A8I6X7E0
GO:0009755	hormone-mediated signaling pathway	2	28	0.517862	0.832107	A0A8I6WXW1;A0A8I6XJ52
GO:0010558	negative regulation of macromolecule biosynthetic process	2	28	0.517862	0.832107	A0A8I6Z9Z3;F2DH88
GO:0055082	cellular chemical homeostasis	2	28	0.517862	0.832107	A0A8I6XZU9;A0A8I7B0Y3
GO:2000113	negative regulation of cellular macromolecule biosynthetic process	2	28	0.517862	0.832107	A0A8I6Z9Z3;F2DH88
GO:0006605	protein targeting	7	111	0.523038	0.832107	A0A8I6XAI2;A0A8I6XBH2;A0A8I7B4D8;A0A8I7B5C4;F2CXT5;F2D4G9;F2DVU1
GO:0019219	regulation of nucleobase-containing compound metabolic process	5	78	0.523467	0.832107	A0A287H6P9;A0A8I6YL06;A0A8I6YSZ9;F2DH88;F2EJZ7
GO:0006790	sulfur compound metabolic process	6	95	0.528466	0.832107	A0A8I6WE67;A0A8I6WII2;A0A8I6WVD2;A0A8I6XBA4;A0A8I6Y5P8;A0A8I7BFL1
GO:0006206	pyrimidine nucleobase metabolic process	1	12	0.5313	0.832107	A0A287VZP8
GO:0006334	nucleosome assembly	1	12	0.5313	0.832107	A0A8I6YL06
GO:0006553	lysine metabolic process	1	12	0.5313	0.832107	A0A8I6XPB3
GO:0006887	exocytosis	1	12	0.5313	0.832107	M0W534
GO:0007033	vacuole organization	1	12	0.5313	0.832107	F2D5K0
GO:0009082	branched-chain amino acid biosynthetic process	1	12	0.5313	0.832107	A0A8I6XC32
GO:0009658	chloroplast organization	1	12	0.5313	0.832107	A0A8I6X0W8
GO:0009968	negative regulation of signal transduction	1	12	0.5313	0.832107	F2DVU1
GO:0010648	negative regulation of cell communication	1	12	0.5313	0.832107	F2DVU1
GO:0016125	sterol metabolic process	1	12	0.5313	0.832107	A0A8I7BFL1
GO:0023057	negative regulation of signaling	1	12	0.5313	0.832107	F2DVU1
GO:0032543	mitochondrial translation	1	12	0.5313	0.832107	F2EIG1
GO:0034728	nucleosome organization	1	12	0.5313	0.832107	A0A8I6YL06
GO:0042255	ribosome assembly	1	12	0.5313	0.832107	F2D179
GO:0043254	regulation of protein complex assembly	1	12	0.5313	0.832107	A0A287MLU2
GO:0044703	multi-organism reproductive process	1	12	0.5313	0.832107	M0WWJ8
GO:0046364	monosaccharide biosynthetic process	1	12	0.5313	0.832107	A0A8I6WDR8
GO:0060341	regulation of cellular localization	1	12	0.5313	0.832107	M0W534
GO:1901071	glucosamine-containing compound metabolic process	1	12	0.5313	0.832107	A0A8I7B722
GO:0006970	response to osmotic stress	2	29	0.537031	0.832107	A0A8I6WYH3;F2DMU4
GO:0009651	response to salt stress	2	29	0.537031	0.832107	A0A8I6WYH3;F2DMU4
GO:0009890	negative regulation of biosynthetic process	2	29	0.537031	0.832107	A0A8I6Z9Z3;F2DH88
GO:0031327	negative regulation of cellular biosynthetic process	2	29	0.537031	0.832107	A0A8I6Z9Z3;F2DH88
GO:0050657	nucleic acid transport	2	29	0.537031	0.832107	A0A8I6YEZ5;F2E1R5
GO:0050658	RNA transport	2	29	0.537031	0.832107	A0A8I6YEZ5;F2E1R5
GO:0051236	establishment of RNA localization	2	29	0.537031	0.832107	A0A8I6YEZ5;F2E1R5
GO:0006351	transcription, DNA-templated	4	63	0.54357	0.832107	A0A287H6P9;A0A8I7BEI9;F2DH88;F2EJZ7
GO:0032774	RNA biosynthetic process	4	63	0.54357	0.832107	A0A287H6P9;A0A8I7BEI9;F2DH88;F2EJZ7
GO:0097659	nucleic acid-templated transcription	4	63	0.54357	0.832107	A0A287H6P9;A0A8I7BEI9;F2DH88;F2EJZ7
GO:0010468	regulation of gene expression	8	130	0.545918	0.832107	A0A287H6P9;A0A8I6XEF6;A0A8I6YSZ9;A0A8I6Z9Z3;F2D3D5;F2DH88;F2EJZ7;M0WTN6
GO:0009141	nucleoside triphosphate metabolic process	5	80	0.54658	0.832107	A0A8I6WDR8;A0A8I6XKQ4;A0A8I6YC32;F2DNJ1;F2E2B0
GO:0016054	organic acid catabolic process	5	80	0.54658	0.832107	A0A8I6WR80;A0A8I6XC32;F2CXD7;F2DMU4;Q5EXM3
GO:0046395	carboxylic acid catabolic process	5	80	0.54658	0.832107	A0A8I6WR80;A0A8I6XC32;F2CXD7;F2DMU4;Q5EXM3
GO:0032502	developmental process	7	114	0.552257	0.832107	A0A8I6WXG8;A0A8I6YNS5;A0A8I6Z1P9;F2CXD7;F2DZK3;M0WWJ8;Q673G6
GO:0071310	cellular response to organic substance	3	47	0.555298	0.832107	A0A8I6WTG0;A0A8I6WXW1;A0A8I6XJ52
GO:0006403	RNA localization	2	30	0.555673	0.832107	A0A8I6YEZ5;F2E1R5
GO:0009653	anatomical structure morphogenesis	2	30	0.555673	0.832107	F2CXD7;Q673G6
GO:0032870	cellular response to hormone stimulus	2	30	0.555673	0.832107	A0A8I6WXW1;A0A8I6XJ52
GO:0048869	cellular developmental process	2	30	0.555673	0.832107	A0A8I6Z1P9;Q673G6
GO:0072524	pyridine-containing compound metabolic process	4	64	0.556328	0.832107	A0A8I6WDR8;A0A8I6YBQ4;A0A8I6YC32;A0A8I6YIL8
GO:0009056	catabolic process	26	430	0.558106	0.832107	A0A7S9YWD1;A0A8I6WAU3;A0A8I6WDR8;A0A8I6WR80;A0A8I6WVD2;A0A8I6WYU4;A0A8I6X7E0;A0A8I6XAI2;A0A8I6XC32;A0A8I6XEP7;A0A8I6Y2P0;A0A8I6YC32;A0A8I7B5C4;A0A8I7B601;A0A8I7B722;F2CQ10;F2CTU5;F2CV55;F2CXD7;F2D894;F2DC91;F2DMU4;F2E0G2;F2E3Y1;F2E5J1;Q5EXM3
GO:0048856	anatomical structure development	6	98	0.55982	0.832107	A0A8I6WXG8;A0A8I6YNS5;F2CXD7;F2DZK3;M0WWJ8;Q673G6
GO:0006333	chromatin assembly or disassembly	1	13	0.560056	0.832107	A0A8I6YL06
GO:0006406	mRNA export from nucleus	1	13	0.560056	0.832107	F2E1R5
GO:0006525	arginine metabolic process	1	13	0.560056	0.832107	F2CW53
GO:0014070	response to organic cyclic compound	1	13	0.560056	0.832107	F2DGM5
GO:0016114	terpenoid biosynthetic process	1	13	0.560056	0.832107	Q673G6
GO:0016458	gene silencing	1	13	0.560056	0.832107	M0WTN6
GO:0031497	chromatin assembly	1	13	0.560056	0.832107	A0A8I6YL06
GO:0033043	regulation of organelle organization	1	13	0.560056	0.832107	A0A287MLU2
GO:0040029	regulation of gene expression, epigenetic	1	13	0.560056	0.832107	M0WTN6
GO:0042398	cellular modified amino acid biosynthetic process	1	13	0.560056	0.832107	F2DYM4
GO:0043650	dicarboxylic acid biosynthetic process	1	13	0.560056	0.832107	F2DYM4
GO:0044247	cellular polysaccharide catabolic process	1	13	0.560056	0.832107	F2E0G2
GO:0045036	protein targeting to chloroplast	1	13	0.560056	0.832107	F2DVU1
GO:0050684	regulation of mRNA processing	1	13	0.560056	0.832107	A0A8I6YSZ9
GO:0071427	mRNA-containing ribonucleoprotein complex export from nucleus	1	13	0.560056	0.832107	F2E1R5
GO:0072596	establishment of protein localization to chloroplast	1	13	0.560056	0.832107	F2DVU1
GO:0072598	protein localization to chloroplast	1	13	0.560056	0.832107	F2DVU1
GO:1901698	response to nitrogen compound	1	13	0.560056	0.832107	F2DMU4
GO:1903311	regulation of mRNA metabolic process	1	13	0.560056	0.832107	A0A8I6YSZ9
GO:0006996	organelle organization	17	282	0.563699	0.836267	A0A287MLU2;A0A8I6WTG0;A0A8I6X0W8;A0A8I6X3I3;A0A8I6X7E0;A0A8I6Y8G3;A0A8I6YDV3;A0A8I6YL06;F2CXT5;F2D179;F2D2Z9;F2D5K0;F2DA66;F2DNJ1;F2E1R5;F2EEJ9;F2EIG1
GO:0006090	pyruvate metabolic process	3	48	0.569885	0.837104	A0A8I6WDR8;A0A8I6WSL2;A0A8I6YC32
GO:0071495	cellular response to endogenous stimulus	2	31	0.573782	0.837104	A0A8I6WXW1;A0A8I6XJ52
GO:0015980	energy derivation by oxidation of organic compounds	5	83	0.580235	0.837104	A0A8I6XKQ4;F2DNJ1;F2DS63;F2E0G2;F2E2B0
GO:0043161	proteasome-mediated ubiquitin-dependent protein catabolic process	3	49	0.584177	0.837104	A0A8I6WAU3;A0A8I6X7E0;F2D894
GO:0006213	pyrimidine nucleoside metabolic process	1	14	0.587058	0.837104	A0A287VZP8
GO:0006323	DNA packaging	1	14	0.587058	0.837104	A0A8I6YL06
GO:0008202	steroid metabolic process	1	14	0.587058	0.837104	A0A8I7BFL1
GO:0009218	pyrimidine ribonucleotide metabolic process	1	14	0.587058	0.837104	A0A287VZP8
GO:0009220	pyrimidine ribonucleotide biosynthetic process	1	14	0.587058	0.837104	A0A287VZP8
GO:0009738	abscisic acid-activated signaling pathway	1	14	0.587058	0.837104	A0A8I6XJ52
GO:0015979	photosynthesis	1	14	0.587058	0.837104	F2DC91
GO:0044087	regulation of cellular component biogenesis	1	14	0.587058	0.837104	A0A287MLU2
GO:0046131	pyrimidine ribonucleoside metabolic process	1	14	0.587058	0.837104	A0A287VZP8
GO:0046132	pyrimidine ribonucleoside biosynthetic process	1	14	0.587058	0.837104	A0A287VZP8
GO:0046134	pyrimidine nucleoside biosynthetic process	1	14	0.587058	0.837104	A0A287VZP8
GO:0048367	shoot system development	1	14	0.587058	0.837104	Q673G6
GO:0071215	cellular response to abscisic acid stimulus	1	14	0.587058	0.837104	A0A8I6XJ52
GO:0043604	amide biosynthetic process	13	219	0.588388	0.837104	A0A8I6W8C2;A0A8I6XEF6;A0A8I6Z9Z3;F2CS15;F2CUI5;F2DH88;F2DVU2;F2DXD4;F2DYM4;F2EAX5;F2ECK7;F2EG94;F2EIG1
GO:0051171	regulation of nitrogen compound metabolic process	7	118	0.589998	0.837104	A0A287H6P9;A0A8I6XEF6;A0A8I6YL06;A0A8I6YSZ9;A0A8I6Z9Z3;F2DH88;F2EJZ7
GO:0006461	protein complex assembly	6	101	0.59019	0.837104	A0A287MLU2;A0A8I6WYH3;A0A8I6X3I3;A0A8I6X7E0;A0A8I6YL06;F2DNJ1
GO:0044802	single-organism membrane organization	6	101	0.59019	0.837104	A0A8I6Y8G3;A0A8I6YDV3;A0A8I7B4D8;F2D4G9;F2E1R5;F2EEJ9
GO:0070271	protein complex biogenesis	6	101	0.59019	0.837104	A0A287MLU2;A0A8I6WYH3;A0A8I6X3I3;A0A8I6X7E0;A0A8I6YL06;F2DNJ1
GO:1901605	alpha-amino acid metabolic process	8	135	0.590305	0.837104	A0A8I6WR80;A0A8I6XC32;A0A8I6XPB3;F2CW53;F2DG56;F2DMU4;F2DYM4;Q5EXM3
GO:0007275	multicellular organism development	5	84	0.59116	0.837104	A0A8I6WXG8;A0A8I6YNS5;F2CXD7;F2DZK3;Q673G6
GO:0006811	ion transport	2	32	0.591353	0.837104	A0A8I6XZU9;F2DXG7
GO:0015931	nucleobase-containing compound transport	2	32	0.591353	0.837104	A0A8I6YEZ5;F2E1R5
GO:0035556	intracellular signal transduction	2	32	0.591353	0.837104	A0A8I6WXW1;F2DVU1
GO:0070925	organelle assembly	2	32	0.591353	0.837104	A0A8I6X7E0;F2D179
GO:1901617	organic hydroxy compound biosynthetic process	2	32	0.591353	0.837104	A0A8I6YBQ4;A0A8I7BFL1
GO:0009057	macromolecule catabolic process	13	220	0.595324	0.837104	A0A8I6WAU3;A0A8I6WYU4;A0A8I6X7E0;A0A8I6XAI2;A0A8I6XEP7;A0A8I6Y2P0;A0A8I7B5C4;A0A8I7B601;A0A8I7B722;F2CQ10;F2D894;F2E0G2;F2E3Y1
GO:0044767	single-organism developmental process	6	102	0.600074	0.837104	A0A8I6WXG8;A0A8I6YNS5;A0A8I6Z1P9;F2CXD7;F2DZK3;Q673G6
GO:0009126	purine nucleoside monophosphate metabolic process	5	85	0.601931	0.837104	A0A8I6WDR8;A0A8I6XKQ4;A0A8I6YC32;F2DNJ1;F2E2B0
GO:0009167	purine ribonucleoside monophosphate metabolic process	5	85	0.601931	0.837104	A0A8I6WDR8;A0A8I6XKQ4;A0A8I6YC32;F2DNJ1;F2E2B0
GO:0022618	ribonucleoprotein complex assembly	4	68	0.605401	0.837104	A0A8I6W8C2;F2D0F3;F2D179;F2DXD4
GO:0006412	translation	12	205	0.608288	0.837104	A0A8I6W8C2;A0A8I6XEF6;A0A8I6Z9Z3;F2CS15;F2CUI5;F2DH88;F2DVU2;F2DXD4;F2EAX5;F2ECK7;F2EG94;F2EIG1
GO:0006073	cellular glucan metabolic process	2	33	0.608383	0.837104	F2D903;F2E0G2
GO:0006096	glycolytic process	2	33	0.608383	0.837104	A0A8I6WDR8;A0A8I6YC32
GO:0006165	nucleoside diphosphate phosphorylation	2	33	0.608383	0.837104	A0A8I6WDR8;A0A8I6YC32
GO:0006757	ATP generation from ADP	2	33	0.608383	0.837104	A0A8I6WDR8;A0A8I6YC32
GO:0009135	purine nucleoside diphosphate metabolic process	2	33	0.608383	0.837104	A0A8I6WDR8;A0A8I6YC32
GO:0009179	purine ribonucleoside diphosphate metabolic process	2	33	0.608383	0.837104	A0A8I6WDR8;A0A8I6YC32
GO:0022402	cell cycle process	2	33	0.608383	0.837104	A0A8I6WDS1;A0A8I6X7E0
GO:0032259	methylation	2	33	0.608383	0.837104	F2D5L5;F2DW39
GO:0046031	ADP metabolic process	2	33	0.608383	0.837104	A0A8I6WDR8;A0A8I6YC32
GO:0046939	nucleotide phosphorylation	2	33	0.608383	0.837104	A0A8I6WDR8;A0A8I6YC32
GO:0006355	regulation of transcription, DNA-templated	3	51	0.611851	0.837104	A0A287H6P9;F2DH88;F2EJZ7
GO:1903506	regulation of nucleic acid-templated transcription	3	51	0.611851	0.837104	A0A287H6P9;F2DH88;F2EJZ7
GO:2001141	regulation of RNA biosynthetic process	3	51	0.611851	0.837104	A0A287H6P9;F2DH88;F2EJZ7
GO:0006261	DNA-dependent DNA replication	1	15	0.612412	0.837104	A0A8I6WDS1
GO:0007015	actin filament organization	1	15	0.612412	0.837104	A0A287MLU2
GO:0009657	plastid organization	1	15	0.612412	0.837104	A0A8I6X0W8
GO:0040007	growth	1	15	0.612412	0.837104	Q673G6
GO:0042546	cell wall biogenesis	1	15	0.612412	0.837104	F2D903
GO:0043484	regulation of RNA splicing	1	15	0.612412	0.837104	A0A8I6YSZ9
GO:0046112	nucleobase biosynthetic process	1	15	0.612412	0.837104	A0A287VZP8
GO:0048278	vesicle docking	1	15	0.612412	0.837104	M0W534
GO:0048585	negative regulation of response to stimulus	1	15	0.612412	0.837104	F2DVU1
GO:0065003	macromolecular complex assembly	10	172	0.614951	0.839417	A0A287MLU2;A0A8I6W8C2;A0A8I6WYH3;A0A8I6X3I3;A0A8I6X7E0;A0A8I6YL06;F2D0F3;F2D179;F2DNJ1;F2DXD4
GO:0051252	regulation of RNA metabolic process	4	69	0.61715	0.840104	A0A287H6P9;A0A8I6YSZ9;F2DH88;F2EJZ7
GO:0071826	ribonucleoprotein complex subunit organization	4	69	0.61715	0.840104	A0A8I6W8C2;F2D0F3;F2D179;F2DXD4
GO:1901564	organonitrogen compound metabolic process	36	608	0.618606	0.84093	A0A287VZP8;A0A8I6W8C2;A0A8I6WDR8;A0A8I6WE67;A0A8I6WII2;A0A8I6WR80;A0A8I6WVD2;A0A8I6XBA4;A0A8I6XC32;A0A8I6XEF6;A0A8I6XKQ4;A0A8I6XPB3;A0A8I6Y5P8;A0A8I6Y9I1;A0A8I6YBQ4;A0A8I6YC32;A0A8I6YIL8;A0A8I6Z9Z3;A0A8I7B722;F2CS15;F2CUI5;F2CW53;F2DC91;F2DG56;F2DH88;F2DMU4;F2DNJ1;F2DVU2;F2DXD4;F2DYM4;F2E2B0;F2EAX5;F2ECK7;F2EG94;F2EIG1;Q5EXM3
GO:0043043	peptide biosynthetic process	12	207	0.622295	0.844787	A0A8I6W8C2;A0A8I6XEF6;A0A8I6Z9Z3;F2CS15;F2CUI5;F2DH88;F2DVU2;F2DXD4;F2EAX5;F2ECK7;F2EG94;F2EIG1
GO:0034622	cellular macromolecular complex assembly	8	140	0.632558	0.848578	A0A287MLU2;A0A8I6W8C2;A0A8I6X3I3;A0A8I6YL06;F2D0F3;F2D179;F2DNJ1;F2DXD4
GO:0044707	single-multicellular organism process	5	88	0.633271	0.848578	A0A8I6WXG8;A0A8I6YNS5;F2CXD7;F2DZK3;Q673G6
GO:0006022	aminoglycan metabolic process	1	16	0.63622	0.848578	A0A8I7B722
GO:0006040	amino sugar metabolic process	1	16	0.63622	0.848578	A0A8I7B722
GO:0006414	translational elongation	1	16	0.63622	0.848578	A0A8I6XEF6
GO:0006487	protein N-linked glycosylation	1	16	0.63622	0.848578	A0A8I6XTS4
GO:0008654	phospholipid biosynthetic process	1	16	0.63622	0.848578	A0A8I7BFL1
GO:0009251	glucan catabolic process	1	16	0.63622	0.848578	F2E0G2
GO:0030036	actin cytoskeleton organization	1	16	0.63622	0.848578	A0A287MLU2
GO:0065004	protein-DNA complex assembly	1	16	0.63622	0.848578	A0A8I6YL06
GO:0071824	protein-DNA complex subunit organization	1	16	0.63622	0.848578	A0A8I6YL06
GO:0080134	regulation of response to stress	1	16	0.63622	0.848578	F2DVU1
GO:0097306	cellular response to alcohol	1	16	0.63622	0.848578	A0A8I6XJ52
GO:0009119	ribonucleoside metabolic process	6	106	0.638315	0.850228	A0A287VZP8;A0A8I6WDR8;A0A8I6XKQ4;A0A8I6YC32;F2DNJ1;F2E2B0
GO:0007005	mitochondrion organization	4	72	0.651081	0.863289	A0A8I6X3I3;F2CXT5;F2DNJ1;F2EIG1
GO:0045333	cellular respiration	4	72	0.651081	0.863289	A0A8I6XKQ4;F2DNJ1;F2DS63;F2E2B0
GO:0016043	cellular component organization	27	466	0.655966	0.863289	A0A287MLU2;A0A8I6W8C2;A0A8I6WTG0;A0A8I6WYH3;A0A8I6X0W8;A0A8I6X3I3;A0A8I6X7E0;A0A8I6XEF6;A0A8I6Y8G3;A0A8I6YDV3;A0A8I6YL06;A0A8I7B4D8;F2CXT5;F2D0F3;F2D179;F2D2Z9;F2D4G9;F2D5K0;F2D903;F2D9S7;F2DA66;F2DNJ1;F2DXD4;F2E1R5;F2EEJ9;F2EIG1;Q673G6
GO:0044042	glucan metabolic process	2	36	0.656241	0.863289	F2D903;F2E0G2
GO:0048583	regulation of response to stimulus	2	36	0.656241	0.863289	A0A8I6X7E0;F2DVU1
GO:0090150	establishment of protein localization to membrane	2	36	0.656241	0.863289	A0A8I7B4D8;F2D4G9
GO:0006098	pentose-phosphate shunt	1	17	0.658573	0.863289	A0A8I6YIL8
GO:0006220	pyrimidine nucleotide metabolic process	1	17	0.658573	0.863289	A0A287VZP8
GO:0006221	pyrimidine nucleotide biosynthetic process	1	17	0.658573	0.863289	A0A287VZP8
GO:0006721	terpenoid metabolic process	1	17	0.658573	0.863289	Q673G6
GO:0030029	actin filament-based process	1	17	0.658573	0.863289	A0A287MLU2
GO:0071396	cellular response to lipid	1	17	0.658573	0.863289	A0A8I6XJ52
GO:0055114	oxidation-reduction process	7	126	0.660463	0.863481	A0A8I6XKQ4;F2CXD7;F2DC91;F2DNJ1;F2DS63;F2E0G2;F2E2B0
GO:1902589	single-organism organelle organization	7	126	0.660463	0.863481	A0A287MLU2;A0A8I6X7E0;A0A8I6Y8G3;A0A8I6YL06;F2CXT5;F2EEJ9;F2EIG1
GO:0009259	ribonucleotide metabolic process	6	109	0.665554	0.86899	A0A287VZP8;A0A8I6WDR8;A0A8I6XKQ4;A0A8I6YC32;F2DNJ1;F2E2B0
GO:0006091	generation of precursor metabolites and energy	7	127	0.668748	0.872012	A0A8I6WDR8;A0A8I6XKQ4;A0A8I6YC32;F2DNJ1;F2DS63;F2E0G2;F2E2B0
GO:0009066	aspartate family amino acid metabolic process	2	37	0.671129	0.872339	A0A8I6XC32;A0A8I6XPB3
GO:0044264	cellular polysaccharide metabolic process	2	37	0.671129	0.872339	F2D903;F2E0G2
GO:0009161	ribonucleoside monophosphate metabolic process	5	92	0.672674	0.872339	A0A8I6WDR8;A0A8I6XKQ4;A0A8I6YC32;F2DNJ1;F2E2B0
GO:0009116	nucleoside metabolic process	6	110	0.674346	0.872339	A0A287VZP8;A0A8I6WDR8;A0A8I6XKQ4;A0A8I6YC32;F2DNJ1;F2E2B0
GO:0032446	protein modification by small protein conjugation	3	56	0.675535	0.872339	A0A8I6WAU3;F2CQ10;F2CQH9
GO:0044712	single-organism catabolic process	12	215	0.675797	0.872339	A0A7S9YWD1;A0A8I6WDR8;A0A8I6WR80;A0A8I6XC32;A0A8I6YC32;F2CTU5;F2CV55;F2CXD7;F2DMU4;F2E0G2;F2E5J1;Q5EXM3
GO:0007031	peroxisome organization	1	18	0.679562	0.872339	F2CXT5
GO:0016226	iron-sulfur cluster assembly	1	18	0.679562	0.872339	F2D9S7
GO:0022406	membrane docking	1	18	0.679562	0.872339	M0W534
GO:0031163	metallo-sulfur cluster assembly	1	18	0.679562	0.872339	F2D9S7
GO:0032940	secretion by cell	1	18	0.679562	0.872339	M0W534
GO:0046903	secretion	1	18	0.679562	0.872339	M0W534
GO:0010556	regulation of macromolecule biosynthetic process	5	93	0.682082	0.873312	A0A287H6P9;A0A8I6XEF6;A0A8I6Z9Z3;F2DH88;F2EJZ7
GO:2000112	regulation of cellular macromolecule biosynthetic process	5	93	0.682082	0.873312	A0A287H6P9;A0A8I6XEF6;A0A8I6Z9Z3;F2DH88;F2EJZ7
GO:0043170	macromolecule metabolic process	52	889	0.683135	0.873531	A0A287H6P9;A0A8I6W8C2;A0A8I6WAU3;A0A8I6WDS1;A0A8I6WYU4;A0A8I6X7E0;A0A8I6XAI2;A0A8I6XD40;A0A8I6XEF6;A0A8I6XEP7;A0A8I6XTS4;A0A8I6Y2P0;A0A8I6Y9I1;A0A8I6YL06;A0A8I6YMY2;A0A8I6YSZ9;A0A8I6Z9Z3;A0A8I7B2H8;A0A8I7B2U1;A0A8I7B5C4;A0A8I7B601;A0A8I7B722;A0A8I7BBJ7;A0A8I7BEI9;F2CQ10;F2CQH9;F2CS15;F2CTA6;F2CUI5;F2CXT5;F2CZC9;F2D0F3;F2D3D5;F2D811;F2D894;F2D903;F2DGN5;F2DH88;F2DP42;F2DV56;F2DVU1;F2DVU2;F2DXD4;F2…
GO:0019693	ribose phosphate metabolic process	7	129	0.684949	0.874722	A0A287VZP8;A0A8I6WDR8;A0A8I6XKQ4;A0A8I6YC32;A0A8I6YIL8;F2DNJ1;F2E2B0
GO:0043623	cellular protein complex assembly	3	57	0.687314	0.875486	A0A287MLU2;A0A8I6X3I3;F2DNJ1
GO:0051188	cofactor biosynthetic process	3	57	0.687314	0.875486	F2DC91;F2DG56;F2DYM4
GO:0009123	nucleoside monophosphate metabolic process	5	94	0.69131	0.87728	A0A8I6WDR8;A0A8I6XKQ4;A0A8I6YC32;F2DNJ1;F2E2B0
GO:0071822	protein complex subunit organization	7	130	0.692861	0.87728	A0A287MLU2;A0A8I6WYH3;A0A8I6X3I3;A0A8I6X7E0;A0A8I6XEF6;A0A8I6YL06;F2DNJ1
GO:1901575	organic substance catabolic process	22	390	0.696516	0.87728	A0A8I6WAU3;A0A8I6WDR8;A0A8I6WR80;A0A8I6WVD2;A0A8I6WYU4;A0A8I6X7E0;A0A8I6XAI2;A0A8I6XC32;A0A8I6XEP7;A0A8I6Y2P0;A0A8I6YC32;A0A8I7B5C4;A0A8I7B601;A0A8I7B722;F2CQ10;F2CXD7;F2D894;F2DC91;F2DMU4;F2E0G2;F2E3Y1;Q5EXM3
GO:0022607	cellular component assembly	11	201	0.697306	0.87728	A0A287MLU2;A0A8I6W8C2;A0A8I6WYH3;A0A8I6X3I3;A0A8I6X7E0;A0A8I6YL06;F2D0F3;F2D179;F2D9S7;F2DNJ1;F2DXD4
GO:0019362	pyridine nucleotide metabolic process	3	58	0.698773	0.87728	A0A8I6WDR8;A0A8I6YC32;A0A8I6YIL8
GO:0046496	nicotinamide nucleotide metabolic process	3	58	0.698773	0.87728	A0A8I6WDR8;A0A8I6YC32;A0A8I6YIL8
GO:0006405	RNA export from nucleus	1	19	0.699267	0.87728	F2E1R5
GO:0009084	glutamine family amino acid biosynthetic process	1	19	0.699267	0.87728	F2CW53
GO:0034605	cellular response to heat	1	19	0.699267	0.87728	F2EGN2
GO:0051235	maintenance of location	1	19	0.699267	0.87728	A0A8I6XZU9
GO:0072528	pyrimidine-containing compound biosynthetic process	1	19	0.699267	0.87728	A0A287VZP8
GO:0007010	cytoskeleton organization	2	39	0.699345	0.87728	A0A287MLU2;A0A8I6X7E0
GO:0046128	purine ribonucleoside metabolic process	5	96	0.709222	0.884879	A0A8I6WDR8;A0A8I6XKQ4;A0A8I6YC32;F2DNJ1;F2E2B0
GO:0010498	proteasomal protein catabolic process	3	59	0.709914	0.884879	A0A8I6WAU3;A0A8I6X7E0;F2D894
GO:0044724	single-organism carbohydrate catabolic process	3	59	0.709914	0.884879	A0A8I6WDR8;A0A8I6YC32;F2E0G2
GO:0065002	intracellular protein transmembrane transport	2	40	0.71269	0.884879	F2CXT5;F2D4G9
GO:0071806	protein transmembrane transport	2	40	0.71269	0.884879	F2CXT5;F2D4G9
GO:0006357	regulation of transcription from RNA polymerase II promoter	1	20	0.717769	0.884879	F2EJZ7
GO:0006739	NADP metabolic process	1	20	0.717769	0.884879	A0A8I6YIL8
GO:0006897	endocytosis	1	20	0.717769	0.884879	A0A8I6X7E0
GO:0009112	nucleobase metabolic process	1	20	0.717769	0.884879	A0A287VZP8
GO:0019682	glyceraldehyde-3-phosphate metabolic process	1	20	0.717769	0.884879	A0A8I6YIL8
GO:0048285	organelle fission	1	20	0.717769	0.884879	A0A8I6X0W8
GO:0051156	glucose 6-phosphate metabolic process	1	20	0.717769	0.884879	A0A8I6YIL8
GO:1901136	carbohydrate derivative catabolic process	1	20	0.717769	0.884879	A0A8I7B722
GO:0031326	regulation of cellular biosynthetic process	5	97	0.717904	0.884879	A0A287H6P9;A0A8I6XEF6;A0A8I6Z9Z3;F2DH88;F2EJZ7
GO:1901657	glycosyl compound metabolic process	6	116	0.723984	0.890614	A0A287VZP8;A0A8I6WDR8;A0A8I6XKQ4;A0A8I6YC32;F2DNJ1;F2E2B0
GO:0016567	protein ubiquitination	2	41	0.72554	0.890614	F2CQ10;F2CQH9
GO:0042278	purine nucleoside metabolic process	5	98	0.726403	0.890614	A0A8I6WDR8;A0A8I6XKQ4;A0A8I6YC32;F2DNJ1;F2E2B0
GO:0006733	oxidoreduction coenzyme metabolic process	3	61	0.731251	0.890614	A0A8I6WDR8;A0A8I6YC32;A0A8I6YIL8
GO:0006457	protein folding	5	99	0.734719	0.890614	A0A8I6WYH3;A0A8I6Y4H4;F2CXT5;F2DGG1;F2EGN2
GO:0009150	purine ribonucleotide metabolic process	5	99	0.734719	0.890614	A0A8I6WDR8;A0A8I6XKQ4;A0A8I6YC32;F2DNJ1;F2E2B0
GO:0009889	regulation of biosynthetic process	5	99	0.734719	0.890614	A0A287H6P9;A0A8I6XEF6;A0A8I6Z9Z3;F2DH88;F2EJZ7
GO:0006084	acetyl-CoA metabolic process	1	21	0.735138	0.890614	A0A8I7BFL1
GO:0006260	DNA replication	1	21	0.735138	0.890614	A0A8I6WDS1
GO:0006812	cation transport	1	21	0.735138	0.890614	A0A8I6XZU9
GO:0006890	retrograde vesicle-mediated transport, Golgi to ER	1	21	0.735138	0.890614	A0A8I6WUP0
GO:0030154	cell differentiation	1	21	0.735138	0.890614	A0A8I6Z1P9
GO:0046148	pigment biosynthetic process	1	21	0.735138	0.890614	F2DG56
GO:0072527	pyrimidine-containing compound metabolic process	1	21	0.735138	0.890614	A0A287VZP8
GO:0034645	cellular macromolecule biosynthetic process	18	330	0.737991	0.892685	A0A287H6P9;A0A8I6W8C2;A0A8I6WDS1;A0A8I6XEF6;A0A8I6XTS4;A0A8I6Z9Z3;A0A8I7BEI9;F2CS15;F2CUI5;F2DH88;F2DV56;F2DVU2;F2DXD4;F2EAX5;F2ECK7;F2EG94;F2EIG1;F2EJZ7
GO:0070647	protein modification by small protein conjugation or removal	3	62	0.741452	0.892685	A0A8I6WAU3;F2CQ10;F2CQH9
GO:0006163	purine nucleotide metabolic process	5	100	0.742853	0.892685	A0A8I6WDR8;A0A8I6XKQ4;A0A8I6YC32;F2DNJ1;F2E2B0
GO:0051186	cofactor metabolic process	7	137	0.744649	0.892685	A0A8I6WDR8;A0A8I6YC32;A0A8I6YIL8;A0A8I7BFL1;F2DC91;F2DG56;F2DYM4
GO:1901607	alpha-amino acid biosynthetic process	4	82	0.749333	0.892685	A0A8I6XC32;A0A8I6XPB3;F2CW53;F2DYM4
GO:0006325	chromatin organization	1	22	0.751445	0.892685	A0A8I6YL06
GO:0009620	response to fungus	1	22	0.751445	0.892685	P33044
GO:0034220	ion transmembrane transport	1	22	0.751445	0.892685	F2DXG7
GO:0042542	response to hydrogen peroxide	1	22	0.751445	0.892685	A0A8I6WYH3
GO:0050832	defense response to fungus	1	22	0.751445	0.892685	P33044
GO:0051604	protein maturation	1	22	0.751445	0.892685	F2CXT5
GO:0071103	DNA conformation change	1	22	0.751445	0.892685	A0A8I6YL06
GO:0071166	ribonucleoprotein complex localization	1	22	0.751445	0.892685	F2E1R5
GO:0071229	cellular response to acid chemical	1	22	0.751445	0.892685	A0A8I6XJ52
GO:0071426	ribonucleoprotein complex export from nucleus	1	22	0.751445	0.892685	F2E1R5
GO:0043933	macromolecular complex subunit organization	11	210	0.751583	0.892685	A0A287MLU2;A0A8I6W8C2;A0A8I6WYH3;A0A8I6X3I3;A0A8I6X7E0;A0A8I6XEF6;A0A8I6YL06;F2D0F3;F2D179;F2DNJ1;F2DXD4
GO:0009059	macromolecule biosynthetic process	18	333	0.752161	0.892685	A0A287H6P9;A0A8I6W8C2;A0A8I6WDS1;A0A8I6XEF6;A0A8I6XTS4;A0A8I6Z9Z3;A0A8I7BEI9;F2CS15;F2CUI5;F2DH88;F2DV56;F2DVU2;F2DXD4;F2EAX5;F2ECK7;F2EG94;F2EIG1;F2EJZ7
GO:0006259	DNA metabolic process	3	64	0.760937	0.897112	A0A8I6WDS1;A0A8I6YL06;F2CQH9
GO:0055085	transmembrane transport	3	64	0.760937	0.897112	F2CXT5;F2D4G9;F2DXG7
GO:0006364	rRNA processing	2	44	0.761218	0.897112	A0A8I6XD40;F2EG94
GO:0016072	rRNA metabolic process	2	44	0.761218	0.897112	A0A8I6XD40;F2EG94
GO:0000226	microtubule cytoskeleton organization	1	23	0.766755	0.897112	A0A8I6X7E0
GO:0006635	fatty acid beta-oxidation	1	23	0.766755	0.897112	F2CXD7
GO:0017148	negative regulation of translation	1	23	0.766755	0.897112	A0A8I6Z9Z3
GO:0034249	negative regulation of cellular amide metabolic process	1	23	0.766755	0.897112	A0A8I6Z9Z3
GO:0042274	ribosomal small subunit biogenesis	1	23	0.766755	0.897112	F2EG94
GO:0044275	cellular carbohydrate catabolic process	1	23	0.766755	0.897112	F2E0G2
GO:0051259	protein oligomerization	1	23	0.766755	0.897112	A0A8I6WYH3
GO:0051301	cell division	1	23	0.766755	0.897112	A0A8I6X0W8
GO:0071840	cellular component organization or biogenesis	29	529	0.77871	0.909631	A0A287MLU2;A0A8I6W8C2;A0A8I6WTG0;A0A8I6WYH3;A0A8I6X0W8;A0A8I6X3I3;A0A8I6X7E0;A0A8I6XD40;A0A8I6XEF6;A0A8I6Y8G3;A0A8I6YDV3;A0A8I6YL06;A0A8I7B4D8;F2CXT5;F2D0F3;F2D179;F2D2Z9;F2D4G9;F2D5K0;F2D903;F2D9S7;F2DA66;F2DNJ1;F2DXD4;F2E1R5;F2EEJ9;F2EG94;F2EIG1;Q673G6
GO:0006626	protein targeting to mitochondrion	1	24	0.781127	0.909631	F2CXT5
GO:0070585	protein localization to mitochondrion	1	24	0.781127	0.909631	F2CXT5
GO:0072655	establishment of protein localization to mitochondrion	1	24	0.781127	0.909631	F2CXT5
GO:0009117	nucleotide metabolic process	7	143	0.783961	0.91186	A0A287VZP8;A0A8I6WDR8;A0A8I6XKQ4;A0A8I6YC32;A0A8I6YIL8;F2DNJ1;F2E2B0
GO:0044260	cellular macromolecule metabolic process	41	736	0.789816	0.916344	A0A287H6P9;A0A8I6W8C2;A0A8I6WAU3;A0A8I6WDS1;A0A8I6WYU4;A0A8I6X7E0;A0A8I6XAI2;A0A8I6XD40;A0A8I6XEF6;A0A8I6XEP7;A0A8I6XTS4;A0A8I6Y2P0;A0A8I6YL06;A0A8I6YSZ9;A0A8I6Z9Z3;A0A8I7B2H8;A0A8I7B5C4;A0A8I7B601;A0A8I7B722;A0A8I7BEI9;F2CQ10;F2CQH9;F2CS15;F2CTA6;F2CUI5;F2CZC9;F2D0F3;F2D894;F2D903;F2DH88;F2DV56;F2DVU1;F2DVU2;F2DXD4;F2E0G2;F2E3Y1;F2EAX5;F2ECK7;F2EG94;F2EIG1;F2EJZ7
GO:0044283	small molecule biosynthetic process	9	181	0.790744	0.916344	A0A8I6WDR8;A0A8I6WR80;A0A8I6XC32;A0A8I6XPB3;A0A8I6YBQ4;A0A8I7BFL1;F2CW53;F2DYM4;Q673G6
GO:0072657	protein localization to membrane	2	47	0.792835	0.916344	A0A8I7B4D8;F2D4G9
GO:0009069	serine family amino acid metabolic process	1	25	0.794618	0.916344	A0A8I6XC32
GO:0019395	fatty acid oxidation	1	25	0.794618	0.916344	F2CXD7
GO:0046165	alcohol biosynthetic process	1	25	0.794618	0.916344	A0A8I7BFL1
GO:0022613	ribonucleoprotein complex biogenesis	6	126	0.794619	0.916344	A0A8I6W8C2;A0A8I6XD40;F2D0F3;F2D179;F2DXD4;F2EG94
GO:0006753	nucleoside phosphate metabolic process	7	145	0.796029	0.916344	A0A287VZP8;A0A8I6WDR8;A0A8I6XKQ4;A0A8I6YC32;A0A8I6YIL8;F2DNJ1;F2E2B0
GO:0018130	heterocycle biosynthetic process	9	182	0.796137	0.916344	A0A287H6P9;A0A287VZP8;A0A8I6YBQ4;A0A8I7BEI9;F2DC91;F2DG56;F2DH88;F2DYM4;F2EJZ7
GO:0006637	acyl-CoA metabolic process	1	26	0.807283	0.922742	A0A8I7BFL1
GO:0006644	phospholipid metabolic process	1	26	0.807283	0.922742	A0A8I7BFL1
GO:0009311	oligosaccharide metabolic process	1	26	0.807283	0.922742	A0A8I6XTS4
GO:0032269	negative regulation of cellular protein metabolic process	1	26	0.807283	0.922742	A0A8I6Z9Z3
GO:0035383	thioester metabolic process	1	26	0.807283	0.922742	A0A8I7BFL1
GO:0051248	negative regulation of protein metabolic process	1	26	0.807283	0.922742	A0A8I6Z9Z3
GO:0071554	cell wall organization or biogenesis	2	49	0.81182	0.924306	A0A8I7B722;F2D903
GO:0006796	phosphate-containing compound metabolic process	13	258	0.812264	0.924306	A0A287VZP8;A0A8I6WDR8;A0A8I6WXW1;A0A8I6XKQ4;A0A8I6Y1U6;A0A8I6YC32;A0A8I6YIL8;A0A8I6Z0S4;A0A8I7BFL1;F2DNJ1;F2DVU1;F2E2B0;F2E8P3
GO:0042254	ribosome biogenesis	3	70	0.81238	0.924306	A0A8I6XD40;F2D179;F2EG94
GO:0044085	cellular component biogenesis	14	276	0.812382	0.924306	A0A287MLU2;A0A8I6W8C2;A0A8I6WYH3;A0A8I6X3I3;A0A8I6X7E0;A0A8I6XD40;A0A8I6YL06;F2D0F3;F2D179;F2D903;F2D9S7;F2DNJ1;F2DXD4;F2EG94
GO:0044271	cellular nitrogen compound biosynthetic process	20	384	0.818311	0.926711	A0A287H6P9;A0A287VZP8;A0A8I6W8C2;A0A8I6XEF6;A0A8I6YBQ4;A0A8I6Z9Z3;A0A8I7BEI9;F2CS15;F2CUI5;F2DC91;F2DG56;F2DH88;F2DVU2;F2DXD4;F2DYM4;F2EAX5;F2ECK7;F2EG94;F2EIG1;F2EJZ7
GO:0006310	DNA recombination	1	27	0.819172	0.926711	A0A8I6YL06
GO:0006366	transcription from RNA polymerase II promoter	1	27	0.819172	0.926711	F2EJZ7
GO:0009062	fatty acid catabolic process	1	27	0.819172	0.926711	F2CXD7
GO:1901701	cellular response to oxygen-containing compound	1	27	0.819172	0.926711	A0A8I6XJ52
GO:0044699	single-organism process	80	1395	0.826483	0.931879	A0A287MLU2;A0A287VZP8;A0A7S9YWD1;A0A8I6WDR8;A0A8I6WDS1;A0A8I6WHE5;A0A8I6WR80;A0A8I6WSL2;A0A8I6WTG0;A0A8I6WUP0;A0A8I6WXG8;A0A8I6WXW1;A0A8I6X0W8;A0A8I6X7E0;A0A8I6XAI2;A0A8I6XBH2;A0A8I6XC32;A0A8I6XEF6;A0A8I6XJ52;A0A8I6XKQ4;A0A8I6XLR3;A0A8I6XPB3;A0A8I6XQT6;A0A8I6XTS4;A0A8I6XZU9;A0A8I6Y8G3;A0A8I6YBQ4;A0A8I6YC32;A0A8I6YDV3;A0A8I6YIL8;A0A8I6YL06;A0A8I6YLU5;A0A8I6YM43;A0A8I6YNS5;A0A8I6Z0S4;A0A8I6Z1P9;A0A…
GO:0044282	small molecule catabolic process	5	112	0.826561	0.931879	A0A8I6WR80;A0A8I6XC32;F2CXD7;F2DMU4;Q5EXM3
GO:0072521	purine-containing compound metabolic process	5	112	0.826561	0.931879	A0A8I6WDR8;A0A8I6XKQ4;A0A8I6YC32;F2DNJ1;F2E2B0
GO:1902580	single-organism cellular localization	7	151	0.829208	0.933801	A0A8I6XAI2;A0A8I6XBH2;A0A8I7B4D8;A0A8I7B5C4;F2CXT5;F2D4G9;F2DVU1
GO:0009067	aspartate family amino acid biosynthetic process	1	28	0.830331	0.934005	A0A8I6XPB3
GO:0008652	cellular amino acid biosynthetic process	4	93	0.831542	0.934307	A0A8I6XC32;A0A8I6XPB3;F2CW53;F2DYM4
GO:0019438	aromatic compound biosynthetic process	9	191	0.840171	0.936162	A0A287H6P9;A0A287VZP8;A0A8I6YBQ4;A0A8I7BEI9;F2DC91;F2DG56;F2DH88;F2DYM4;F2EJZ7
GO:0006606	protein import into nucleus	1	29	0.840806	0.936162	A0A8I6XBH2
GO:0034504	protein localization to nucleus	1	29	0.840806	0.936162	A0A8I6XBH2
GO:0044744	protein targeting to nucleus	1	29	0.840806	0.936162	A0A8I6XBH2
GO:0045229	external encapsulating structure organization	1	29	0.840806	0.936162	F2D903
GO:0051170	nuclear import	1	29	0.840806	0.936162	A0A8I6XBH2
GO:0071555	cell wall organization	1	29	0.840806	0.936162	F2D903
GO:1902593	single-organism nuclear import	1	29	0.840806	0.936162	A0A8I6XBH2
GO:1901362	organic cyclic compound biosynthetic process	10	210	0.841695	0.936162	A0A287H6P9;A0A287VZP8;A0A8I6YBQ4;A0A8I7BEI9;A0A8I7BFL1;F2DC91;F2DG56;F2DH88;F2DYM4;F2EJZ7
GO:0009408	response to heat	2	53	0.845217	0.937527	A0A8I6WYH3;F2EGN2
GO:0034470	ncRNA processing	2	53	0.845217	0.937527	A0A8I6XD40;F2EG94
GO:1901566	organonitrogen compound biosynthetic process	20	392	0.845761	0.937527	A0A287VZP8;A0A8I6W8C2;A0A8I6XC32;A0A8I6XEF6;A0A8I6XPB3;A0A8I6YBQ4;A0A8I6Z9Z3;F2CS15;F2CUI5;F2CW53;F2DC91;F2DG56;F2DH88;F2DVU2;F2DXD4;F2DYM4;F2EAX5;F2ECK7;F2EG94;F2EIG1
GO:0034440	lipid oxidation	1	30	0.850639	0.938734	F2CXD7
GO:0051168	nuclear export	1	30	0.850639	0.938734	F2E1R5
GO:1903047	mitotic cell cycle process	1	30	0.850639	0.938734	A0A8I6WDS1
GO:1990542	mitochondrial transmembrane transport	1	30	0.850639	0.938734	F2CXT5
GO:0010467	gene expression	24	465	0.853205	0.940519	A0A287H6P9;A0A8I6W8C2;A0A8I6XD40;A0A8I6XEF6;A0A8I6YSZ9;A0A8I6Z9Z3;A0A8I7B2H8;A0A8I7BEI9;F2CS15;F2CTA6;F2CUI5;F2CXT5;F2D0F3;F2D3D5;F2DH88;F2DVU2;F2DXD4;F2E1R5;F2EAX5;F2ECK7;F2EG94;F2EIG1;F2EJZ7;M0WTN6
GO:0007049	cell cycle	2	55	0.859828	0.94471	A0A8I6WDS1;A0A8I6X7E0
GO:0000302	response to reactive oxygen species	1	31	0.859867	0.94471	A0A8I6WYH3
GO:0006006	glucose metabolic process	1	31	0.859867	0.94471	A0A8I6WDR8
GO:0006732	coenzyme metabolic process	5	119	0.86434	0.948572	A0A8I6WDR8;A0A8I6YC32;A0A8I6YIL8;A0A8I7BFL1;F2DYM4
GO:0000272	polysaccharide catabolic process	2	56	0.866653	0.950059	A0A8I7B722;F2E0G2
GO:0006974	cellular response to DNA damage stimulus	2	57	0.873175	0.95615	A0A8I6WDS1;F2CQH9
GO:1901135	carbohydrate derivative metabolic process	10	219	0.8765	0.956793	A0A287VZP8;A0A8I6WDR8;A0A8I6XKQ4;A0A8I6XTS4;A0A8I6YC32;A0A8I6YIL8;A0A8I7B722;F2DNJ1;F2DV56;F2E2B0
GO:0044242	cellular lipid catabolic process	1	33	0.876658	0.956793	F2CXD7
GO:0044743	intracellular protein transmembrane import	1	33	0.876658	0.956793	F2CXT5
GO:0055086	nucleobase-containing small molecule metabolic process	7	162	0.878965	0.958255	A0A287VZP8;A0A8I6WDR8;A0A8I6XKQ4;A0A8I6YC32;A0A8I6YIL8;F2DNJ1;F2E2B0
GO:0006886	intracellular protein transport	9	201	0.880095	0.958433	A0A8I6XAI2;A0A8I6XBH2;A0A8I7B4D8;A0A8I7B5C4;F2CXT5;F2D4G9;F2DKP3;F2DVU1;F2E7F7
GO:0005976	polysaccharide metabolic process	3	81	0.882651	0.960161	A0A8I7B722;F2D903;F2E0G2
GO:0072329	monocarboxylic acid catabolic process	1	34	0.884288	0.960888	F2CXD7
GO:0006793	phosphorus metabolic process	13	278	0.885518	0.96117	A0A287VZP8;A0A8I6WDR8;A0A8I6WXW1;A0A8I6XKQ4;A0A8I6Y1U6;A0A8I6YC32;A0A8I6YIL8;A0A8I6Z0S4;A0A8I7BFL1;F2DNJ1;F2DVU1;F2E2B0;F2E8P3
GO:0006839	mitochondrial transport	1	35	0.891449	0.966549	F2CXT5
GO:0006520	cellular amino acid metabolic process	8	188	0.90145	0.975431	A0A8I6WR80;A0A8I6XC32;A0A8I6XPB3;F2CW53;F2DG56;F2DMU4;F2DYM4;Q5EXM3
GO:0017038	protein import	2	62	0.901609	0.975431	A0A8I6XBH2;F2CXT5
GO:0009163	nucleoside biosynthetic process	1	37	0.904476	0.9764	A0A287VZP8
GO:0042455	ribonucleoside biosynthetic process	1	37	0.904476	0.9764	A0A287VZP8
GO:0008610	lipid biosynthetic process	2	63	0.906536	0.977559	A0A8I7BFL1;Q673G6
GO:0016052	carbohydrate catabolic process	4	109	0.910365	0.977618	A0A8I6WDR8;A0A8I6YC32;A0A8I7B722;F2E0G2
GO:0016042	lipid catabolic process	1	38	0.910394	0.977618	F2CXD7
GO:0030258	lipid modification	1	38	0.910394	0.977618	F2CXD7
GO:0019637	organophosphate metabolic process	8	191	0.910536	0.977618	A0A287VZP8;A0A8I6WDR8;A0A8I6XKQ4;A0A8I6YC32;A0A8I6YIL8;A0A8I7BFL1;F2DNJ1;F2E2B0
GO:1901615	organic hydroxy compound metabolic process	2	65	0.915709	0.981302	A0A8I6YBQ4;A0A8I7BFL1
GO:1901659	glycosyl compound biosynthetic process	1	39	0.915948	0.981302	A0A287VZP8
GO:0044270	cellular nitrogen compound catabolic process	1	40	0.92116	0.98582	F2DC91
GO:0034654	nucleobase-containing compound biosynthetic process	5	135	0.925582	0.988918	A0A287H6P9;A0A287VZP8;A0A8I7BEI9;F2DH88;F2EJZ7
GO:0046700	heterocycle catabolic process	1	41	0.926051	0.988918	F2DC91
GO:0051276	chromosome organization	1	42	0.930639	0.98993	A0A8I6YL06
GO:0034613	cellular protein localization	9	220	0.933676	0.98993	A0A8I6XAI2;A0A8I6XBH2;A0A8I7B4D8;A0A8I7B5C4;F2CXT5;F2D4G9;F2DKP3;F2DVU1;F2E7F7
GO:0070727	cellular macromolecule localization	9	220	0.933676	0.98993	A0A8I6XAI2;A0A8I6XBH2;A0A8I7B4D8;A0A8I7B5C4;F2CXT5;F2D4G9;F2DKP3;F2DVU1;F2E7F7
GO:0034641	cellular nitrogen compound metabolic process	40	784	0.934846	0.98993	A0A287H6P9;A0A287VZP8;A0A8I6W8C2;A0A8I6WDR8;A0A8I6WDS1;A0A8I6WE67;A0A8I6WII2;A0A8I6WVD2;A0A8I6XBA4;A0A8I6XD40;A0A8I6XEF6;A0A8I6XKQ4;A0A8I6Y5P8;A0A8I6Y9I1;A0A8I6YBQ4;A0A8I6YC32;A0A8I6YIL8;A0A8I6YL06;A0A8I6YSZ9;A0A8I6Z9Z3;A0A8I7B2H8;A0A8I7BEI9;F2CQH9;F2CS15;F2CTA6;F2CUI5;F2D0F3;F2DC91;F2DG56;F2DH88;F2DNJ1;F2DVU2;F2DXD4;F2DYM4;F2E2B0;F2EAX5;F2ECK7;F2EG94;F2EIG1;F2EJZ7
GO:1901137	carbohydrate derivative biosynthetic process	3	95	0.937901	0.98993	A0A287VZP8;A0A8I6XTS4;F2DV56
GO:0016053	organic acid biosynthetic process	5	140	0.938934	0.98993	A0A8I6XC32;A0A8I6XPB3;F2CW53;F2DYM4;Q673G6
GO:0046394	carboxylic acid biosynthetic process	5	140	0.938934	0.98993	A0A8I6XC32;A0A8I6XPB3;F2CW53;F2DYM4;Q673G6
GO:0006066	alcohol metabolic process	1	44	0.938986	0.98993	A0A8I7BFL1
GO:0006099	tricarboxylic acid cycle	1	44	0.938986	0.98993	F2DS63
GO:0006101	citrate metabolic process	1	44	0.938986	0.98993	F2DS63
GO:0009108	coenzyme biosynthetic process	1	44	0.938986	0.98993	F2DYM4
GO:0009260	ribonucleotide biosynthetic process	1	44	0.938986	0.98993	A0A287VZP8
GO:0008380	RNA splicing	3	96	0.940748	0.990734	A0A8I6YSZ9;A0A8I7B2H8;F2D0F3
GO:0046390	ribose phosphate biosynthetic process	1	45	0.942776	0.990765	A0A287VZP8
GO:0072350	tricarboxylic acid metabolic process	1	45	0.942776	0.990765	F2DS63
GO:0044262	cellular carbohydrate metabolic process	2	73	0.944625	0.991656	F2D903;F2E0G2
GO:0000278	mitotic cell cycle	1	46	0.946333	0.992398	A0A8I6WDS1
GO:0006281	DNA repair	1	47	0.94967	0.993313	F2CQH9
GO:0009060	aerobic respiration	1	47	0.94967	0.993313	F2DS63
GO:0006807	nitrogen compound metabolic process	47	917	0.950213	0.993313	A0A287H6P9;A0A287VZP8;A0A8I6W8C2;A0A8I6WDR8;A0A8I6WDS1;A0A8I6WE67;A0A8I6WII2;A0A8I6WR80;A0A8I6WVD2;A0A8I6XBA4;A0A8I6XC32;A0A8I6XD40;A0A8I6XEF6;A0A8I6XKQ4;A0A8I6XPB3;A0A8I6Y5P8;A0A8I6Y9I1;A0A8I6YBQ4;A0A8I6YC32;A0A8I6YIL8;A0A8I6YL06;A0A8I6YSZ9;A0A8I6Z9Z3;A0A8I7B2H8;A0A8I7B722;A0A8I7BEI9;F2CQH9;F2CS15;F2CTA6;F2CUI5;F2CW53;F2D0F3;F2DC91;F2DG56;F2DH88;F2DMU4;F2DNJ1;F2DVU2;F2DXD4;F2DYM4;F2E2B0;F2EAX5;F…
GO:0006396	RNA processing	6	169	0.954647	0.995937	A0A8I6XD40;A0A8I6YSZ9;A0A8I7B2H8;F2CTA6;F2D0F3;F2EG94
GO:0016051	carbohydrate biosynthetic process	1	49	0.955738	0.995937	A0A8I6WDR8
GO:0019318	hexose metabolic process	1	49	0.955738	0.995937	A0A8I6WDR8
GO:0019439	aromatic compound catabolic process	1	50	0.958493	0.997759	F2DC91
GO:0090407	organophosphate biosynthetic process	2	79	0.959858	0.997907	A0A287VZP8;A0A8I7BFL1
GO:0044763	single-organism cellular process	59	1132	0.961727	0.997907	A0A287MLU2;A0A287VZP8;A0A7S9YWD1;A0A8I6WDR8;A0A8I6WDS1;A0A8I6WHE5;A0A8I6WR80;A0A8I6WSL2;A0A8I6WTG0;A0A8I6WXW1;A0A8I6X0W8;A0A8I6X7E0;A0A8I6XC32;A0A8I6XEF6;A0A8I6XJ52;A0A8I6XKQ4;A0A8I6XPB3;A0A8I6XTS4;A0A8I6XZU9;A0A8I6Y8G3;A0A8I6YBQ4;A0A8I6YC32;A0A8I6YDV3;A0A8I6YIL8;A0A8I6YL06;A0A8I6Z0S4;A0A8I6Z1P9;A0A8I7B0Y3;A0A8I7B4D8;A0A8I7BFL1;A1X810;F2CQH9;F2CTU5;F2CUF4;F2CV55;F2CW53;F2CXD7;F2CXT5;F2D4G9;F2DC91…
GO:0009165	nucleotide biosynthetic process	1	52	0.963503	0.997907	A0A287VZP8
GO:1901293	nucleoside phosphate biosynthetic process	1	52	0.963503	0.997907	A0A287VZP8
GO:1901361	organic cyclic compound catabolic process	1	53	0.965778	0.997907	F2DC91
GO:0000375	RNA splicing, via transesterification reactions	2	83	0.967698	0.997907	A0A8I6YSZ9;F2D0F3
GO:0000377	RNA splicing, via transesterification reactions with bulged adenosine as nucleophile	2	83	0.967698	0.997907	A0A8I6YSZ9;F2D0F3
GO:0000398	mRNA splicing, via spliceosome	2	83	0.967698	0.997907	A0A8I6YSZ9;F2D0F3
GO:0034660	ncRNA metabolic process	2	83	0.967698	0.997907	A0A8I6XD40;F2EG94
GO:1901576	organic substance biosynthetic process	30	643	0.971093	0.999643	A0A287H6P9;A0A287VZP8;A0A8I6W8C2;A0A8I6WDR8;A0A8I6WDS1;A0A8I6WR80;A0A8I6XC32;A0A8I6XEF6;A0A8I6XPB3;A0A8I6XTS4;A0A8I6YBQ4;A0A8I6Z9Z3;A0A8I7BEI9;A0A8I7BFL1;F2CS15;F2CUI5;F2CW53;F2DC91;F2DG56;F2DH88;F2DV56;F2DVU2;F2DXD4;F2DYM4;F2EAX5;F2ECK7;F2EG94;F2EIG1;F2EJZ7;Q673G6
GO:0044237	cellular metabolic process	79	1476	0.973217	0.999643	A0A287H6P9;A0A287VZP8;A0A7S9YWD1;A0A8I6W8C2;A0A8I6WAU3;A0A8I6WDR8;A0A8I6WDS1;A0A8I6WE67;A0A8I6WII2;A0A8I6WR80;A0A8I6WSL2;A0A8I6WVD2;A0A8I6WXW1;A0A8I6WYU4;A0A8I6X7E0;A0A8I6XAI2;A0A8I6XBA4;A0A8I6XC32;A0A8I6XD40;A0A8I6XEF6;A0A8I6XEP7;A0A8I6XKQ4;A0A8I6XPB3;A0A8I6XTS4;A0A8I6Y1U6;A0A8I6Y2P0;A0A8I6Y5P8;A0A8I6Y9I1;A0A8I6YBQ4;A0A8I6YC32;A0A8I6YIL8;A0A8I6YL06;A0A8I6YSZ9;A0A8I6Z0S4;A0A8I6Z9Z3;A0A8I7B2H8;A0A…
GO:0044255	cellular lipid metabolic process	3	113	0.973987	0.999643	A0A8I7BFL1;F2CXD7;Q673G6
GO:0005975	carbohydrate metabolic process	10	268	0.974296	0.999643	A0A8I6WDR8;A0A8I6X6P0;A0A8I6XTS4;A0A8I6YC32;A0A8I6YIL8;A0A8I7B722;F2D6T5;F2D903;F2DV56;F2E0G2
GO:0044249	cellular biosynthetic process	29	633	0.976582	0.999643	A0A287H6P9;A0A287VZP8;A0A8I6W8C2;A0A8I6WDS1;A0A8I6WR80;A0A8I6XC32;A0A8I6XEF6;A0A8I6XPB3;A0A8I6XTS4;A0A8I6YBQ4;A0A8I6Z9Z3;A0A8I7BEI9;A0A8I7BFL1;F2CS15;F2CUI5;F2CW53;F2DC91;F2DG56;F2DH88;F2DV56;F2DVU2;F2DXD4;F2DYM4;F2EAX5;F2ECK7;F2EG94;F2EIG1;F2EJZ7;Q673G6
GO:0006631	fatty acid metabolic process	1	61	0.979568	0.999643	F2CXD7
GO:0044723	single-organism carbohydrate metabolic process	5	166	0.979576	0.999643	A0A8I6WDR8;A0A8I6XTS4;A0A8I6YC32;F2DV56;F2E0G2
GO:0043436	oxoacid metabolic process	15	375	0.979591	0.999643	A0A8I6WDR8;A0A8I6WR80;A0A8I6WSL2;A0A8I6XC32;A0A8I6XPB3;A0A8I6YC32;F2CW53;F2CXD7;F2DE08;F2DG56;F2DMU4;F2DS63;F2DYM4;Q5EXM3;Q673G6
GO:0090304	nucleic acid metabolic process	13	336	0.980001	0.999643	A0A287H6P9;A0A8I6WDS1;A0A8I6XD40;A0A8I6YL06;A0A8I6YSZ9;A0A8I7B2H8;A0A8I7BEI9;F2CQH9;F2CTA6;F2D0F3;F2DH88;F2EG94;F2EJZ7
GO:0032787	monocarboxylic acid metabolic process	4	144	0.980971	0.999643	A0A8I6WDR8;A0A8I6WSL2;A0A8I6YC32;F2CXD7
GO:0016070	RNA metabolic process	10	277	0.981417	0.999643	A0A287H6P9;A0A8I6XD40;A0A8I6YSZ9;A0A8I7B2H8;A0A8I7BEI9;F2CTA6;F2D0F3;F2DH88;F2EG94;F2EJZ7
GO:0006082	organic acid metabolic process	15	378	0.981486	0.999643	A0A8I6WDR8;A0A8I6WR80;A0A8I6WSL2;A0A8I6XC32;A0A8I6XPB3;A0A8I6YC32;F2CW53;F2CXD7;F2DE08;F2DG56;F2DMU4;F2DS63;F2DYM4;Q5EXM3;Q673G6
GO:0044711	single-organism biosynthetic process	13	342	0.983699	0.999728	A0A287VZP8;A0A8I6WDR8;A0A8I6WDS1;A0A8I6WR80;A0A8I6XC32;A0A8I6XPB3;A0A8I6YBQ4;A0A8I7BFL1;F2CW53;F2DG56;F2DYM4;F2EIG1;Q673G6
GO:0009058	biosynthetic process	31	687	0.985561	0.999728	A0A287H6P9;A0A287VZP8;A0A8I6W8C2;A0A8I6WDR8;A0A8I6WDS1;A0A8I6WR80;A0A8I6XC32;A0A8I6XEF6;A0A8I6XPB3;A0A8I6XTS4;A0A8I6YBQ4;A0A8I6Z9Z3;A0A8I7BEI9;A0A8I7BFL1;F2CS15;F2CUI5;F2CW53;F2D9S7;F2DC91;F2DG56;F2DH88;F2DV56;F2DVU2;F2DXD4;F2DYM4;F2EAX5;F2ECK7;F2EG94;F2EIG1;F2EJZ7;Q673G6
GO:0005996	monosaccharide metabolic process	1	67	0.986138	0.999728	A0A8I6WDR8
GO:0009987	cellular process	111	1999	0.987239	0.999728	A0A287H6P9;A0A287MLU2;A0A287VZP8;A0A7S9YWD1;A0A8I6W8C2;A0A8I6WAU3;A0A8I6WDR8;A0A8I6WDS1;A0A8I6WE67;A0A8I6WHE5;A0A8I6WII2;A0A8I6WR80;A0A8I6WSL2;A0A8I6WTG0;A0A8I6WVD2;A0A8I6WXW1;A0A8I6WYH3;A0A8I6WYU4;A0A8I6X0W8;A0A8I6X3I3;A0A8I6X7E0;A0A8I6XAI2;A0A8I6XBA4;A0A8I6XBH2;A0A8I6XC32;A0A8I6XD40;A0A8I6XEF6;A0A8I6XEP7;A0A8I6XJ52;A0A8I6XKQ4;A0A8I6XPB3;A0A8I6XTS4;A0A8I6XZU9;A0A8I6Y1U6;A0A8I6Y2P0;A0A8I6Y4H4;A0A…
GO:0019752	carboxylic acid metabolic process	14	373	0.988814	0.999728	A0A8I6WDR8;A0A8I6WR80;A0A8I6WSL2;A0A8I6XC32;A0A8I6XPB3;A0A8I6YC32;F2CW53;F2CXD7;F2DG56;F2DMU4;F2DS63;F2DYM4;Q5EXM3;Q673G6
GO:0006397	mRNA processing	2	106	0.991075	0.999728	A0A8I6YSZ9;F2D0F3
GO:0008152	metabolic process	94	1755	0.991362	0.999728	A0A287H6P9;A0A287VZP8;A0A7S9YWD1;A0A8I6W8C2;A0A8I6WAU3;A0A8I6WDR8;A0A8I6WDS1;A0A8I6WE67;A0A8I6WII2;A0A8I6WR80;A0A8I6WSL2;A0A8I6WVD2;A0A8I6WXW1;A0A8I6WYU4;A0A8I6X6P0;A0A8I6X7E0;A0A8I6XAI2;A0A8I6XBA4;A0A8I6XC32;A0A8I6XD40;A0A8I6XEF6;A0A8I6XEP7;A0A8I6XKQ4;A0A8I6XPB3;A0A8I6XTS4;A0A8I6Y1U6;A0A8I6Y2P0;A0A8I6Y5P8;A0A8I6Y9I1;A0A8I6YBQ4;A0A8I6YC32;A0A8I6YIL8;A0A8I6YL06;A0A8I6YMY2;A0A8I6YSZ9;A0A8I6Z0S4;A0A…
GO:0046483	heterocycle metabolic process	24	579	0.992338	0.999728	A0A287H6P9;A0A287VZP8;A0A8I6WDR8;A0A8I6WDS1;A0A8I6XD40;A0A8I6XKQ4;A0A8I6YBQ4;A0A8I6YC32;A0A8I6YIL8;A0A8I6YL06;A0A8I6YSZ9;A0A8I7B2H8;A0A8I7BEI9;F2CQH9;F2CTA6;F2D0F3;F2DC91;F2DG56;F2DH88;F2DNJ1;F2DYM4;F2E2B0;F2EG94;F2EJZ7
GO:0006629	lipid metabolic process	3	139	0.993171	0.999728	A0A8I7BFL1;F2CXD7;Q673G6
GO:0071704	organic substance metabolic process	83	1596	0.994036	0.999728	A0A287H6P9;A0A287VZP8;A0A8I6W8C2;A0A8I6WAU3;A0A8I6WDR8;A0A8I6WDS1;A0A8I6WE67;A0A8I6WII2;A0A8I6WR80;A0A8I6WSL2;A0A8I6WVD2;A0A8I6WYU4;A0A8I6X6P0;A0A8I6X7E0;A0A8I6XAI2;A0A8I6XBA4;A0A8I6XC32;A0A8I6XD40;A0A8I6XEF6;A0A8I6XEP7;A0A8I6XKQ4;A0A8I6XPB3;A0A8I6XTS4;A0A8I6Y2P0;A0A8I6Y5P8;A0A8I6Y9I1;A0A8I6YBQ4;A0A8I6YC32;A0A8I6YIL8;A0A8I6YL06;A0A8I6YMY2;A0A8I6YSZ9;A0A8I6Z9Z3;A0A8I7B2H8;A0A8I7B2U1;A0A8I7B5C4;A0A…
GO:0006139	nucleobase-containing compound metabolic process	20	518	0.995452	0.999728	A0A287H6P9;A0A287VZP8;A0A8I6WDR8;A0A8I6WDS1;A0A8I6XD40;A0A8I6XKQ4;A0A8I6YC32;A0A8I6YIL8;A0A8I6YL06;A0A8I6YSZ9;A0A8I7B2H8;A0A8I7BEI9;F2CQH9;F2CTA6;F2D0F3;F2DH88;F2DNJ1;F2E2B0;F2EG94;F2EJZ7
GO:0044281	small molecule metabolic process	22	565	0.99656	0.999728	A0A287VZP8;A0A8I6WDR8;A0A8I6WR80;A0A8I6WSL2;A0A8I6XC32;A0A8I6XKQ4;A0A8I6XPB3;A0A8I6YBQ4;A0A8I6YC32;A0A8I6YIL8;A0A8I7BFL1;F2CW53;F2CXD7;F2DE08;F2DG56;F2DMU4;F2DNJ1;F2DS63;F2DYM4;F2E2B0;Q5EXM3;Q673G6
GO:0016071	mRNA metabolic process	2	127	0.997363	0.999728	A0A8I6YSZ9;F2D0F3
GO:0006725	cellular aromatic compound metabolic process	24	615	0.997685	0.999728	A0A287H6P9;A0A287VZP8;A0A8I6WDR8;A0A8I6WDS1;A0A8I6XD40;A0A8I6XKQ4;A0A8I6YBQ4;A0A8I6YC32;A0A8I6YIL8;A0A8I6YL06;A0A8I6YSZ9;A0A8I7B2H8;A0A8I7BEI9;F2CQH9;F2CTA6;F2D0F3;F2DC91;F2DG56;F2DH88;F2DNJ1;F2DYM4;F2E2B0;F2EG94;F2EJZ7
GO:1901360	organic cyclic compound metabolic process	25	638	0.997974	0.999728	A0A287H6P9;A0A287VZP8;A0A8I6WDR8;A0A8I6WDS1;A0A8I6XD40;A0A8I6XKQ4;A0A8I6YBQ4;A0A8I6YC32;A0A8I6YIL8;A0A8I6YL06;A0A8I6YSZ9;A0A8I7B2H8;A0A8I7BEI9;A0A8I7BFL1;F2CQH9;F2CTA6;F2D0F3;F2DC91;F2DG56;F2DH88;F2DNJ1;F2DYM4;F2E2B0;F2EG94;F2EJZ7
GO:0044710	single-organism metabolic process	35	831	0.998379	0.999728	A0A287VZP8;A0A7S9YWD1;A0A8I6WDR8;A0A8I6WDS1;A0A8I6WR80;A0A8I6WSL2;A0A8I6XC32;A0A8I6XKQ4;A0A8I6XPB3;A0A8I6XTS4;A0A8I6YBQ4;A0A8I6YC32;A0A8I6YIL8;A0A8I7BFL1;F2CQH9;F2CTU5;F2CUF4;F2CV55;F2CW53;F2CXD7;F2DC91;F2DE08;F2DG56;F2DMU4;F2DNJ1;F2DS63;F2DV56;F2DVU1;F2DYM4;F2E0G2;F2E2B0;F2E5J1;F2EIG1;Q5EXM3;Q673G6
GO:0044238	primary metabolic process	70	1437	0.998719	0.999728	A0A287H6P9;A0A287VZP8;A0A8I6W8C2;A0A8I6WAU3;A0A8I6WDR8;A0A8I6WDS1;A0A8I6WR80;A0A8I6WYU4;A0A8I6X6P0;A0A8I6X7E0;A0A8I6XAI2;A0A8I6XC32;A0A8I6XD40;A0A8I6XEF6;A0A8I6XEP7;A0A8I6XKQ4;A0A8I6XPB3;A0A8I6XTS4;A0A8I6Y2P0;A0A8I6Y9I1;A0A8I6YC32;A0A8I6YIL8;A0A8I6YL06;A0A8I6YMY2;A0A8I6YSZ9;A0A8I6Z9Z3;A0A8I7B2H8;A0A8I7B2U1;A0A8I7B5C4;A0A8I7B601;A0A8I7B722;A0A8I7BBJ7;A0A8I7BEI9;A0A8I7BFL1;F2CQ10;F2CQH9;F2CS15;F2CT…
GO:0008150	biological_process	157	2571	1	1	A0A067YHQ4;A0A287H6P9;A0A287LRJ1;A0A287MLU2;A0A287VZP8;A0A7S9YWD1;A0A8I6W8C2;A0A8I6WAU3;A0A8I6WDR8;A0A8I6WDS1;A0A8I6WE67;A0A8I6WHE5;A0A8I6WII2;A0A8I6WLJ4;A0A8I6WML8;A0A8I6WR80;A0A8I6WSL2;A0A8I6WTG0;A0A8I6WUP0;A0A8I6WVD2;A0A8I6WXG8;A0A8I6WXW1;A0A8I6WYH3;A0A8I6WYU4;A0A8I6X0W8;A0A8I6X3I3;A0A8I6X488;A0A8I6X6P0;A0A8I6X7E0;A0A8I6XAI2;A0A8I6XBA4;A0A8I6XBH2;A0A8I6XC32;A0A8I6XD40;A0A8I6XEF6;A0A8I6XEP7;A0A…
