# Supplementary material for: Muti-omics revealed the global response of Hordeum vulgare to different wavelength of UV exposure
Source: Research Square preprint supplement (doi:10.21203/rs.3.rs-5763885/v1), 2025-04-23
Supplement: Supplementary file 2 [file 7f32ee6378fd08d5516ebfec.xlsx]

## Sheet: CC
GO ID	Description	out (469)	All (2738)	pvalue	p.adjust	Genes
GO:0098803	respiratory chain complex	19	53	0.000737747	0.212939	A0A8I6WTI3;A0A8I6Y9X5;A0A8I6YH05;A0A8I6ZA75;F2CRR9;F2CT87;F2CZV2;F2D473;F2D5B1;F2D7B2;F2DIN7;F2DMM2;F2DUI2;F2DUK4;F2DYL2;F2E0W3;F2E2B0;F2EL27;Q8SA48
GO:0098800	inner mitochondrial membrane protein complex	23	71	0.0010892	0.212939	A0A8I6WIA9;A0A8I6WTI3;A0A8I6XE20;A0A8I6Y9X5;A0A8I6YH05;A0A8I6ZA75;A0A8I7B5T8;F2CRR9;F2CT87;F2CWQ6;F2CZV2;F2D473;F2D5B1;F2D7B2;F2DIG1;F2DJJ2;F2DMM2;F2DUK4;F2DYL2;F2E0W3;F2E2B0;F2E405;F2EL27
GO:0070469	respiratory chain	19	57	0.00200801	0.226099	A0A8I6WTI3;A0A8I6Y9X5;A0A8I6YH05;A0A8I6ZA75;F2CRR9;F2CT87;F2CZV2;F2D473;F2D5B1;F2D7B2;F2DIN7;F2DMM2;F2DUI2;F2DUK4;F2DYL2;F2E0W3;F2E2B0;F2EL27;Q8SA48
GO:0044455	mitochondrial membrane part	24	79	0.00231303	0.226099	A0A8I6WIA9;A0A8I6WTI3;A0A8I6XE20;A0A8I6Y9X5;A0A8I6YH05;A0A8I6ZA75;A0A8I7B5T8;F2CRR9;F2CT87;F2CWQ6;F2CZV2;F2D473;F2D5B1;F2D7B2;F2D966;F2DIG1;F2DJJ2;F2DMM2;F2DUK4;F2DYL2;F2E0W3;F2E2B0;F2E405;F2EL27
GO:0005746	mitochondrial respiratory chain	16	47	0.00352381	0.235343	A0A8I6WTI3;A0A8I6Y9X5;A0A8I6YH05;A0A8I6ZA75;F2CRR9;F2CT87;F2CZV2;F2D473;F2D5B1;F2D7B2;F2DMM2;F2DUK4;F2DYL2;F2E0W3;F2E2B0;F2EL27
GO:0098798	mitochondrial protein complex	24	82	0.00398761	0.235343	A0A8I6WIA9;A0A8I6WTI3;A0A8I6XE20;A0A8I6Y9X5;A0A8I6YH05;A0A8I6ZA75;A0A8I7B5T8;F2CRR9;F2CT87;F2CWQ6;F2CZV2;F2D473;F2D5B1;F2D7B2;F2D966;F2DIG1;F2DJJ2;F2DMM2;F2DUK4;F2DYL2;F2E0W3;F2E2B0;F2E405;F2EL27
GO:0098796	membrane protein complex	54	226	0.0042133	0.235343	A0A8I6WDR3;A0A8I6WHM6;A0A8I6WIA9;A0A8I6WMI1;A0A8I6WTI3;A0A8I6X6Y8;A0A8I6X8X0;A0A8I6XE20;A0A8I6XEC2;A0A8I6XEP7;A0A8I6XH22;A0A8I6XZV6;A0A8I6Y5Z0;A0A8I6Y9X5;A0A8I6YC75;A0A8I6YH05;A0A8I6Z7P9;A0A8I6ZA75;A0A8I7B5T8;A0A8I7B654;A0A8I7BII2;F2CRK1;F2CRK6;F2CRR9;F2CT83;F2CT87;F2CV17;F2CWF3;F2CWQ6;F2CZV2;F2D2Z9;F2D473;F2D5B1;F2D7B2;F2D966;F2DIG1;F2DIN7;F2DJJ2;F2DKP3;F2DMM2;F2DP42;F2DRI5;F2DUI2;F2DUK4;F2DVC1;…
GO:0044429	mitochondrial part	43	173	0.00493319	0.24111	A0A8I6WIA9;A0A8I6WKM0;A0A8I6WTI3;A0A8I6XCQ2;A0A8I6XE20;A0A8I6Y9X5;A0A8I6YB85;A0A8I6YH05;A0A8I6ZA75;A0A8I7B3D9;A0A8I7B5T8;F2CRR9;F2CRW7;F2CT87;F2CTS4;F2CUF1;F2CVM4;F2CW22;F2CW53;F2CWQ6;F2CXT5;F2CZV2;F2D043;F2D473;F2D5B1;F2D5T2;F2D7B2;F2D8E6;F2D8X9;F2D966;F2DB07;F2DIG1;F2DJJ2;F2DMM2;F2DUK4;F2DUR4;F2DYL2;F2E0W3;F2E2B0;F2E405;F2EIG1;F2EL27;M0XN08
GO:0005740	mitochondrial envelope	34	133	0.00761963	0.300648	A0A8I6WIA9;A0A8I6WKM0;A0A8I6WTI3;A0A8I6XCQ2;A0A8I6XE20;A0A8I6Y9X5;A0A8I6YH05;A0A8I6ZA75;A0A8I7B3D9;A0A8I7B5T8;F2CRR9;F2CT87;F2CUF1;F2CWQ6;F2CXT5;F2CZV2;F2D043;F2D473;F2D5B1;F2D5T2;F2D7B2;F2D8E6;F2D8X9;F2D966;F2DIG1;F2DJJ2;F2DMM2;F2DUK4;F2DYL2;F2E0W3;F2E2B0;F2E405;F2EL27;M0XN08
GO:0031966	mitochondrial membrane	33	129	0.00842023	0.300648	A0A8I6WIA9;A0A8I6WKM0;A0A8I6WTI3;A0A8I6XCQ2;A0A8I6XE20;A0A8I6Y9X5;A0A8I6YH05;A0A8I6ZA75;A0A8I7B3D9;A0A8I7B5T8;F2CRR9;F2CT87;F2CUF1;F2CWQ6;F2CZV2;F2D043;F2D473;F2D5B1;F2D5T2;F2D7B2;F2D8E6;F2D8X9;F2D966;F2DIG1;F2DJJ2;F2DMM2;F2DUK4;F2DYL2;F2E0W3;F2E2B0;F2E405;F2EL27;M0XN08
GO:1990204	oxidoreductase complex	19	64	0.00845812	0.300648	A0A8I6WEH2;A0A8I6WGG3;A0A8I6WTI3;A0A8I6Y9X5;A0A8I6YFN2;A0A8I6YH05;A0A8I6ZA75;F2CRK1;F2CRR9;F2CT87;F2CZV2;F2D473;F2D5B1;F2D7B2;F2DDV8;F2DUK4;F2DYL2;F2E0W3;F2EL27
GO:0005739	mitochondrion	74	345	0.0154282	0.452546	A0A8I6WEH2;A0A8I6WGG3;A0A8I6WHD1;A0A8I6WHE5;A0A8I6WIA9;A0A8I6WKM0;A0A8I6WQV8;A0A8I6WT04;A0A8I6WT13;A0A8I6WTI3;A0A8I6XCQ2;A0A8I6XE20;A0A8I6XQX4;A0A8I6XTB9;A0A8I6XUG0;A0A8I6Y9X5;A0A8I6YB85;A0A8I6YFN2;A0A8I6YH05;A0A8I6Z0L1;A0A8I6ZA75;A0A8I7B3D9;A0A8I7B5T8;F2CQX6;F2CRR9;F2CRW7;F2CT87;F2CTS4;F2CUF1;F2CVB4;F2CVM4;F2CW03;F2CW22;F2CW53;F2CWQ6;F2CXT5;F2CZV2;F2D043;F2D2W5;F2D473;F2D5B1;F2D5L4;F2D5T2;F2D7B2…
GO:0044459	plasma membrane part	7	17	0.0166804	0.452546	A0A8I6XZV6;A0A8I6Z7P9;A0A8I6ZAC4;F2CT83;F2CWF3;F2D2Z9;M0XN08
GO:0045273	respiratory chain complex II	5	10	0.0171557	0.452546	A0A8I6WTI3;F2CT87;F2DUI2;F2EL27;Q8SA48
GO:0005747	mitochondrial respiratory chain complex I	11	33	0.0173611	0.452546	A0A8I6Y9X5;A0A8I6YH05;A0A8I6ZA75;F2CRR9;F2CZV2;F2D473;F2D5B1;F2D7B2;F2DUK4;F2DYL2;F2E0W3
GO:0044425	membrane part	65	302	0.0212998	0.474204	A0A8I6WDR3;A0A8I6WHM6;A0A8I6WIA9;A0A8I6WMI1;A0A8I6WRJ2;A0A8I6WTI3;A0A8I6WWA9;A0A8I6X6Y8;A0A8I6X8X0;A0A8I6XE20;A0A8I6XEC2;A0A8I6XEP7;A0A8I6XH22;A0A8I6XIU6;A0A8I6XZV6;A0A8I6Y4H4;A0A8I6Y5Z0;A0A8I6Y9X5;A0A8I6YC75;A0A8I6YH05;A0A8I6YVL6;A0A8I6Z7P9;A0A8I6ZA75;A0A8I6ZAC4;A0A8I7B5T8;A0A8I7B654;A0A8I7BII2;F2CRK1;F2CRK6;F2CRR9;F2CSE2;F2CT83;F2CT87;F2CV17;F2CWF3;F2CWQ6;F2CZV2;F2D2Z9;F2D473;F2D5B1;F2D7B2;F2D9…
GO:0030964	NADH dehydrogenase complex	11	34	0.0218303	0.474204	A0A8I6Y9X5;A0A8I6YH05;A0A8I6ZA75;F2CRR9;F2CZV2;F2D473;F2D5B1;F2D7B2;F2DUK4;F2DYL2;F2E0W3
GO:0045271	respiratory chain complex I	11	34	0.0218303	0.474204	A0A8I6Y9X5;A0A8I6YH05;A0A8I6ZA75;F2CRR9;F2CZV2;F2D473;F2D5B1;F2D7B2;F2DUK4;F2DYL2;F2E0W3
GO:0009898	cytoplasmic side of plasma membrane	2	2	0.0292894	0.480368	F2CT83;F2D2Z9
GO:0098562	cytoplasmic side of membrane	2	2	0.0292894	0.480368	F2CT83;F2D2Z9
GO:1902494	catalytic complex	34	146	0.0309507	0.480368	A0A8I6WEH2;A0A8I6WGG3;A0A8I6WTI3;A0A8I6XEM6;A0A8I6XH22;A0A8I6XUU4;A0A8I6Y5Z0;A0A8I6Y9X5;A0A8I6YD95;A0A8I6YFN2;A0A8I6YH05;A0A8I6ZA75;A0A8I7B654;A0A8I7BCM2;A0A8I7BF02;A0A8I7BII2;F2CRK1;F2CRR9;F2CT87;F2CVE0;F2CZV2;F2D119;F2D473;F2D5B1;F2D7B2;F2DDV8;F2DUK4;F2DYL2;F2E0W3;F2E3X1;F2E4D2;F2E4M8;F2EL27;M0WAP6
GO:0000785	chromatin	14	50	0.0364337	0.480368	A0A287U5M5;A0A8I6WDV9;A0A8I6WKT1;A0A8I6WV37;A0A8I6X313;A0A8I6X7G0;A0A8I6X8T5;A0A8I6Y8S1;A0A8I6YL06;A0A8I6YZG5;F2CUP3;F2DNW4;F2EHE1;F2EJV3
GO:0032991	macromolecular complex	160	836	0.0370879	0.480368	A0A287EZS0;A0A287U5M5;A0A8I6WC09;A0A8I6WDR3;A0A8I6WDS1;A0A8I6WDV9;A0A8I6WEH2;A0A8I6WF91;A0A8I6WFJ6;A0A8I6WGG3;A0A8I6WHM6;A0A8I6WIA9;A0A8I6WKT1;A0A8I6WL52;A0A8I6WMI1;A0A8I6WTI3;A0A8I6WV37;A0A8I6X0Z2;A0A8I6X1I1;A0A8I6X313;A0A8I6X472;A0A8I6X6Y8;A0A8I6X7G0;A0A8I6X7Q6;A0A8I6X8T5;A0A8I6X8X0;A0A8I6XD40;A0A8I6XE20;A0A8I6XEC2;A0A8I6XEM6;A0A8I6XEP7;A0A8I6XEW3;A0A8I6XF02;A0A8I6XFW5;A0A8I6XH22;A0A8I6XH57;A0A…
GO:0005743	mitochondrial inner membrane	25	103	0.0378825	0.480368	A0A8I6WIA9;A0A8I6WKM0;A0A8I6WTI3;A0A8I6XE20;A0A8I6Y9X5;A0A8I6YH05;A0A8I6ZA75;A0A8I7B3D9;A0A8I7B5T8;F2CRR9;F2CT87;F2CWQ6;F2CZV2;F2D473;F2D5B1;F2D7B2;F2DIG1;F2DJJ2;F2DMM2;F2DUK4;F2DYL2;F2E0W3;F2E2B0;F2E405;F2EL27
GO:0000313	organellar ribosome	3	5	0.0380854	0.480368	F2CRW7;F2CVM4;F2EIG1
GO:0005749	mitochondrial respiratory chain complex II, succinate dehydrogenase complex (ubiquinone)	3	5	0.0380854	0.480368	A0A8I6WTI3;F2CT87;F2EL27
GO:0005761	mitochondrial ribosome	3	5	0.0380854	0.480368	F2CRW7;F2CVM4;F2EIG1
GO:0045257	succinate dehydrogenase complex (ubiquinone)	3	5	0.0380854	0.480368	A0A8I6WTI3;F2CT87;F2EL27
GO:0045277	respiratory chain complex IV	3	5	0.0380854	0.480368	F2DIN7;F2DMM2;F2E2B0
GO:0045281	succinate dehydrogenase complex	3	5	0.0380854	0.480368	A0A8I6WTI3;F2CT87;F2EL27
GO:0045283	fumarate reductase complex	3	5	0.0380854	0.480368	A0A8I6WTI3;F2CT87;F2EL27
GO:0000786	nucleosome	11	37	0.0402363	0.491638	A0A8I6WDV9;A0A8I6WKT1;A0A8I6WV37;A0A8I6X313;A0A8I6X7G0;A0A8I6X8T5;A0A8I6Y8S1;A0A8I6YL06;F2CUP3;F2EHE1;F2EJV3
GO:0032993	protein-DNA complex	12	42	0.0439808	0.521106	A0A8I6WDV9;A0A8I6WKT1;A0A8I6WV37;A0A8I6X313;A0A8I6X7G0;A0A8I6X8T5;A0A8I6Y8S1;A0A8I6YL06;F2CUP3;F2ECG8;F2EHE1;F2EJV3
GO:0019866	organelle inner membrane	26	110	0.0467392	0.523925	A0A8I6WIA9;A0A8I6WKM0;A0A8I6WTI3;A0A8I6XE20;A0A8I6Y9X5;A0A8I6YH05;A0A8I6ZA75;A0A8I7B3D9;A0A8I7B5T8;F2CRR9;F2CT87;F2CWQ6;F2CZV2;F2D473;F2D5B1;F2D7B2;F2DIG1;F2DJJ2;F2DMM2;F2DUK4;F2DYL2;F2E0W3;F2E2B0;F2E405;F2EBY7;F2EL27
GO:0031968	organelle outer membrane	9	29	0.0472347	0.523925	F2CUF1;F2D043;F2D8E6;F2D8X9;F2D966;F2DXG7;F2DZG4;F2DZK7;M0XN08
GO:0044815	DNA packaging complex	11	38	0.0482386	0.523925	A0A8I6WDV9;A0A8I6WKT1;A0A8I6WV37;A0A8I6X313;A0A8I6X7G0;A0A8I6X8T5;A0A8I6Y8S1;A0A8I6YL06;F2CUP3;F2EHE1;F2EJV3
GO:0044448	cell cortex part	4	9	0.0521854	0.551473	A0A8I6X0Z2;A0A8I6YXG1;A0A8I6ZAC4;F2E2M2
GO:0019867	outer membrane	9	30	0.0576613	0.577375	F2CUF1;F2D043;F2D8E6;F2D8X9;F2D966;F2DXG7;F2DZG4;F2DZK7;M0XN08
GO:0016020	membrane	162	862	0.0659288	0.577375	A0A287JEP8;A0A287LRJ1;A0A287NWK0;A0A287P008;A0A287Q7U2;A0A287WWM4;A0A8I6WD99;A0A8I6WDR3;A0A8I6WF91;A0A8I6WFI5;A0A8I6WFT4;A0A8I6WG88;A0A8I6WHM6;A0A8I6WIA9;A0A8I6WKM0;A0A8I6WMI1;A0A8I6WRJ2;A0A8I6WTI3;A0A8I6WTJ0;A0A8I6WUT0;A0A8I6WWA9;A0A8I6X1J3;A0A8I6X2Y8;A0A8I6X3E8;A0A8I6X6U8;A0A8I6X6Y8;A0A8I6X8X0;A0A8I6X969;A0A8I6XBL5;A0A8I6XCQ2;A0A8I6XD40;A0A8I6XE20;A0A8I6XEC2;A0A8I6XEP7;A0A8I6XH22;A0A8I6XIK9;A0A…
GO:0000145	exocyst	3	6	0.0666248	0.577375	A0A8I6X0Z2;A0A8I6YXG1;A0A8I6ZAC4
GO:0000275	mitochondrial proton-transporting ATP synthase complex, catalytic core F(1)	3	6	0.0666248	0.577375	A0A8I7B5T8;F2CWQ6;F2DJJ2
GO:0005840	ribosome	26	115	0.0745845	0.577375	F2CRW7;F2CS15;F2CS23;F2CSX2;F2CT73;F2CVM4;F2CZ65;F2D1K5;F2D293;F2D2Y2;F2D483;F2D4K2;F2D558;F2D702;F2DAK3;F2DBW7;F2DFA6;F2DHN5;F2DIR3;F2E0C0;F2E556;F2ECK7;F2EFR1;F2EG94;F2EIG1;Q9XHS0
GO:0015935	small ribosomal subunit	10	36	0.074599	0.577375	F2CS23;F2CVM4;F2D483;F2D702;F2DFA6;F2DHN5;F2DIR3;F2E556;F2EG94;Q9XHS0
GO:0005938	cell cortex	4	10	0.0755386	0.577375	A0A8I6X0Z2;A0A8I6YXG1;A0A8I6ZAC4;F2E2M2
GO:0099568	cytoplasmic region	4	10	0.0755386	0.577375	A0A8I6X0Z2;A0A8I6YXG1;A0A8I6ZAC4;F2E2M2
GO:0031967	organelle envelope	42	199	0.0762505	0.577375	A0A287WWM4;A0A8I6WIA9;A0A8I6WIT4;A0A8I6WKM0;A0A8I6WTI3;A0A8I6XCQ2;A0A8I6XE20;A0A8I6Y9X5;A0A8I6YEZ5;A0A8I6YH05;A0A8I6ZA75;A0A8I7B3D9;A0A8I7B5T8;F2CRR9;F2CT87;F2CUF1;F2CWQ6;F2CXT5;F2CZV2;F2D043;F2D473;F2D5B1;F2D5T2;F2D7B2;F2D8E6;F2D8X9;F2D966;F2DIG1;F2DJJ2;F2DMM2;F2DUK4;F2DXG7;F2DYL2;F2DZG4;F2DZK7;F2E0W3;F2E2B0;F2E405;F2E4I7;F2EBY7;F2EL27;M0XN08
GO:0031975	envelope	42	199	0.0762505	0.577375	A0A287WWM4;A0A8I6WIA9;A0A8I6WIT4;A0A8I6WKM0;A0A8I6WTI3;A0A8I6XCQ2;A0A8I6XE20;A0A8I6Y9X5;A0A8I6YEZ5;A0A8I6YH05;A0A8I6ZA75;A0A8I7B3D9;A0A8I7B5T8;F2CRR9;F2CT87;F2CUF1;F2CWQ6;F2CXT5;F2CZV2;F2D043;F2D473;F2D5B1;F2D5T2;F2D7B2;F2D8E6;F2D8X9;F2D966;F2DIG1;F2DJJ2;F2DMM2;F2DUK4;F2DXG7;F2DYL2;F2DZG4;F2DZK7;F2E0W3;F2E2B0;F2E405;F2E4I7;F2EBY7;F2EL27;M0XN08
GO:0055038	recycling endosome membrane	2	3	0.0778695	0.577375	A0A287LRJ1;F2CV36
GO:0044427	chromosomal part	15	61	0.0859829	0.577375	A0A287U5M5;A0A8I6WDV9;A0A8I6WKT1;A0A8I6WV37;A0A8I6X313;A0A8I6X7G0;A0A8I6X8T5;A0A8I6XJN9;A0A8I6Y8S1;A0A8I6YL06;A0A8I6YZG5;F2CUP3;F2DNW4;F2EHE1;F2EJV3
GO:0043229	intracellular organelle	319	1785	0.0869108	0.577375	A0A0U2GJJ3;A0A0U2GJL1;A0A287EZS0;A0A287LRJ1;A0A287Q7U2;A0A287SCX5;A0A287U5M5;A0A287WWM4;A0A2P1AB13;A0A3S9KBF3;A0A8I6WDR3;A0A8I6WDS1;A0A8I6WDV9;A0A8I6WEH2;A0A8I6WF91;A0A8I6WFJ6;A0A8I6WG88;A0A8I6WGG3;A0A8I6WHD1;A0A8I6WHE5;A0A8I6WHM6;A0A8I6WIA9;A0A8I6WIT4;A0A8I6WKG3;A0A8I6WKM0;A0A8I6WKT1;A0A8I6WL52;A0A8I6WM61;A0A8I6WMI1;A0A8I6WMP9;A0A8I6WQV8;A0A8I6WR25;A0A8I6WRJ2;A0A8I6WT04;A0A8I6WT13;A0A8I6WTI3;A0A…
GO:0031090	organelle membrane	77	392	0.0891576	0.577375	A0A287LRJ1;A0A287Q7U2;A0A287WWM4;A0A8I6WDR3;A0A8I6WF91;A0A8I6WHM6;A0A8I6WIA9;A0A8I6WKM0;A0A8I6WMI1;A0A8I6WRJ2;A0A8I6WTI3;A0A8I6WWA9;A0A8I6X6Y8;A0A8I6X8X0;A0A8I6XCQ2;A0A8I6XE20;A0A8I6XEP7;A0A8I6XH22;A0A8I6XIU6;A0A8I6XLR3;A0A8I6XZV6;A0A8I6Y4H4;A0A8I6Y5Z0;A0A8I6Y9X5;A0A8I6YC75;A0A8I6YH05;A0A8I6YVL6;A0A8I6Z7P9;A0A8I6ZA75;A0A8I7B3D9;A0A8I7B5T8;A0A8I7B654;A0A8I7BII2;F2CRK6;F2CRR9;F2CSE2;F2CT83;F2CT87;F…
GO:0005741	mitochondrial outer membrane	6	19	0.0910496	0.577375	F2CUF1;F2D043;F2D8E6;F2D8X9;F2D966;M0XN08
GO:0016469	proton-transporting two-sector ATPase complex	7	24	0.101441	0.577375	A0A8I6WDR3;A0A8I6X6Y8;A0A8I6XE20;A0A8I7B5T8;F2CRK6;F2CWQ6;F2DJJ2
GO:0043226	organelle	319	1790	0.102128	0.577375	A0A0U2GJJ3;A0A0U2GJL1;A0A287EZS0;A0A287LRJ1;A0A287Q7U2;A0A287SCX5;A0A287U5M5;A0A287WWM4;A0A2P1AB13;A0A3S9KBF3;A0A8I6WDR3;A0A8I6WDS1;A0A8I6WDV9;A0A8I6WEH2;A0A8I6WF91;A0A8I6WFJ6;A0A8I6WG88;A0A8I6WGG3;A0A8I6WHD1;A0A8I6WHE5;A0A8I6WHM6;A0A8I6WIA9;A0A8I6WIT4;A0A8I6WKG3;A0A8I6WKM0;A0A8I6WKT1;A0A8I6WL52;A0A8I6WM61;A0A8I6WMI1;A0A8I6WMP9;A0A8I6WQV8;A0A8I6WR25;A0A8I6WRJ2;A0A8I6WT04;A0A8I6WT13;A0A8I6WTI3;A0A…
GO:0012510	trans-Golgi network transport vesicle membrane	3	7	0.102132	0.577375	A0A8I6XZV6;A0A8I6YC75;A0A8I6Z7P9
GO:0030130	clathrin coat of trans-Golgi network vesicle	3	7	0.102132	0.577375	A0A8I6XZV6;A0A8I6YC75;A0A8I6Z7P9
GO:0030140	trans-Golgi network transport vesicle	3	7	0.102132	0.577375	A0A8I6XZV6;A0A8I6YC75;A0A8I6Z7P9
GO:0005753	mitochondrial proton-transporting ATP synthase complex	4	11	0.103214	0.577375	A0A8I6XE20;A0A8I7B5T8;F2CWQ6;F2DJJ2
GO:0005694	chromosome	15	63	0.107635	0.577375	A0A287U5M5;A0A8I6WDV9;A0A8I6WKT1;A0A8I6WV37;A0A8I6X313;A0A8I6X7G0;A0A8I6X8T5;A0A8I6XJN9;A0A8I6Y8S1;A0A8I6YL06;A0A8I6YZG5;F2CUP3;F2DNW4;F2EHE1;F2EJV3
GO:0044391	ribosomal subunit	21	94	0.112365	0.577375	F2CRW7;F2CS23;F2CSX2;F2CT73;F2CVM4;F2CZ65;F2D1K5;F2D293;F2D483;F2D558;F2D702;F2DAK3;F2DBW7;F2DFA6;F2DHN5;F2DIR3;F2E0C0;F2E556;F2EG94;F2EIG1;Q9XHS0
GO:0022627	cytosolic small ribosomal subunit	9	34	0.113293	0.577375	F2CS23;F2D483;F2D702;F2DFA6;F2DHN5;F2DIR3;F2E556;F2EG94;Q9XHS0
GO:0030658	transport vesicle membrane	8	30	0.126994	0.577375	A0A287LRJ1;A0A8I6WMI1;A0A8I6X8X0;A0A8I6XZV6;A0A8I6YC75;A0A8I6Z7P9;F2CV36;F2ED67
GO:0005886	plasma membrane	25	117	0.132736	0.577375	A0A287LRJ1;A0A287P008;A0A287Q7U2;A0A8I6WG88;A0A8I6WKM0;A0A8I6WWA9;A0A8I6XQR9;A0A8I6XZV6;A0A8I6Y8G2;A0A8I6YKQ7;A0A8I6YT49;A0A8I6Z7P9;A0A8I6ZAC4;F2CPL2;F2CQU9;F2CT83;F2CV36;F2CWF3;F2D2Z9;F2DHZ5;F2DIP6;F2E3J0;F2E5P4;M0XN08;Q4A1H2
GO:0043228	non-membrane-bounded organelle	59	302	0.137015	0.577375	A0A287U5M5;A0A8I6WDV9;A0A8I6WKT1;A0A8I6WV37;A0A8I6X1I1;A0A8I6X313;A0A8I6X472;A0A8I6X6U8;A0A8I6X7G0;A0A8I6X8T5;A0A8I6XJN9;A0A8I6Y8S1;A0A8I6YCQ1;A0A8I6YF06;A0A8I6YKQ7;A0A8I6YKV1;A0A8I6YL06;A0A8I6YZG5;A0A8I7BE90;F2CQY5;F2CRG7;F2CRW7;F2CS15;F2CS23;F2CSX2;F2CT73;F2CUP3;F2CVM4;F2CZ65;F2D1K5;F2D293;F2D2Y2;F2D483;F2D484;F2D4K2;F2D4P0;F2D558;F2D6M6;F2D702;F2DAK3;F2DBW7;F2DDD5;F2DFA6;F2DHN5;F2DIR3;F2DNW4;F…
GO:0043232	intracellular non-membrane-bounded organelle	59	302	0.137015	0.577375	A0A287U5M5;A0A8I6WDV9;A0A8I6WKT1;A0A8I6WV37;A0A8I6X1I1;A0A8I6X313;A0A8I6X472;A0A8I6X6U8;A0A8I6X7G0;A0A8I6X8T5;A0A8I6XJN9;A0A8I6Y8S1;A0A8I6YCQ1;A0A8I6YF06;A0A8I6YKQ7;A0A8I6YKV1;A0A8I6YL06;A0A8I6YZG5;A0A8I7BE90;F2CQY5;F2CRG7;F2CRW7;F2CS15;F2CS23;F2CSX2;F2CT73;F2CUP3;F2CVM4;F2CZ65;F2D1K5;F2D293;F2D2Y2;F2D483;F2D484;F2D4K2;F2D4P0;F2D558;F2D6M6;F2D702;F2DAK3;F2DBW7;F2DDD5;F2DFA6;F2DHN5;F2DIR3;F2DNW4;F…
GO:0000315	organellar large ribosomal subunit	2	4	0.138297	0.577375	F2CRW7;F2EIG1
GO:0005697	telomerase holoenzyme complex	2	4	0.138297	0.577375	F2CQY5;F2DDD5
GO:0005751	mitochondrial respiratory chain complex IV	2	4	0.138297	0.577375	F2DMM2;F2E2B0
GO:0005762	mitochondrial large ribosomal subunit	2	4	0.138297	0.577375	F2CRW7;F2EIG1
GO:0008023	transcription elongation factor complex	2	4	0.138297	0.577375	A0A287EZS0;F2EJZ7
GO:0010494	cytoplasmic stress granule	2	4	0.138297	0.577375	F2D6M6;F2E4I7
GO:0031429	box H/ACA snoRNP complex	2	4	0.138297	0.577375	F2CQY5;F2DDD5
GO:0032588	trans-Golgi network membrane	2	4	0.138297	0.577375	A0A287LRJ1;F2CV36
GO:0072588	box H/ACA RNP complex	2	4	0.138297	0.577375	F2CQY5;F2DDD5
GO:0008180	COP9 signalosome	3	8	0.14336	0.577375	A0A8I6X7Q6;A0A8I6XFW5;A0A8I6YUS4
GO:0071944	cell periphery	29	140	0.149235	0.577375	A0A287LRJ1;A0A287P008;A0A287Q7U2;A0A8I6WG88;A0A8I6WKM0;A0A8I6WWA9;A0A8I6X0Z2;A0A8I6XQR9;A0A8I6XZV6;A0A8I6Y8G2;A0A8I6YF87;A0A8I6YKQ7;A0A8I6YT49;A0A8I6YXG1;A0A8I6Z7P9;A0A8I6ZAC4;F2CPL2;F2CQU9;F2CT83;F2CV36;F2CWF3;F2D2Z9;F2DHZ5;F2DIP6;F2E2M2;F2E3J0;F2E5P4;M0XN08;Q4A1H2
GO:0030133	transport vesicle	10	41	0.150389	0.577375	A0A287LRJ1;A0A8I6WMI1;A0A8I6WTJ0;A0A8I6X2Y8;A0A8I6X8X0;A0A8I6XZV6;A0A8I6YC75;A0A8I6Z7P9;F2CV36;F2ED67
GO:0044446	intracellular organelle part	167	918	0.160045	0.577375	A0A287EZS0;A0A287LRJ1;A0A287Q7U2;A0A287U5M5;A0A287WWM4;A0A3S9KBF3;A0A8I6WDR3;A0A8I6WDS1;A0A8I6WDV9;A0A8I6WF91;A0A8I6WFJ6;A0A8I6WHM6;A0A8I6WIA9;A0A8I6WIT4;A0A8I6WKM0;A0A8I6WKT1;A0A8I6WMI1;A0A8I6WRJ2;A0A8I6WT04;A0A8I6WTI3;A0A8I6WV37;A0A8I6WWA9;A0A8I6X313;A0A8I6X472;A0A8I6X6U8;A0A8I6X6Y8;A0A8I6X7G0;A0A8I6X7Q6;A0A8I6X8T5;A0A8I6X8X0;A0A8I6XCQ2;A0A8I6XD40;A0A8I6XE20;A0A8I6XEM6;A0A8I6XEP7;A0A8I6XEW3;A0A…
GO:0045259	proton-transporting ATP synthase complex	4	13	0.169685	0.577375	A0A8I6XE20;A0A8I7B5T8;F2CWQ6;F2DJJ2
GO:0044422	organelle part	168	926	0.170361	0.577375	A0A287EZS0;A0A287LRJ1;A0A287Q7U2;A0A287U5M5;A0A287WWM4;A0A3S9KBF3;A0A8I6WDR3;A0A8I6WDS1;A0A8I6WDV9;A0A8I6WF91;A0A8I6WFJ6;A0A8I6WHM6;A0A8I6WIA9;A0A8I6WIT4;A0A8I6WKM0;A0A8I6WKT1;A0A8I6WMI1;A0A8I6WRJ2;A0A8I6WT04;A0A8I6WTI3;A0A8I6WV37;A0A8I6WWA9;A0A8I6X313;A0A8I6X472;A0A8I6X6U8;A0A8I6X6Y8;A0A8I6X7G0;A0A8I6X7Q6;A0A8I6X8T5;A0A8I6X8X0;A0A8I6XCQ2;A0A8I6XD40;A0A8I6XE20;A0A8I6XEM6;A0A8I6XEP7;A0A8I6XEW3;A0A…
GO:0000153	cytoplasmic ubiquitin ligase complex	1	1	0.171293	0.577375	A0A8I6Y5Z0
GO:0000314	organellar small ribosomal subunit	1	1	0.171293	0.577375	F2CVM4
GO:0000835	ER ubiquitin ligase complex	1	1	0.171293	0.577375	A0A8I6Y5Z0
GO:0000836	Hrd1p ubiquitin ligase complex	1	1	0.171293	0.577375	A0A8I6Y5Z0
GO:0000839	Hrd1p ubiquitin ligase ERAD-L complex	1	1	0.171293	0.577375	A0A8I6Y5Z0
GO:0002189	ribose phosphate diphosphokinase complex	1	1	0.171293	0.577375	F2D119
GO:0005763	mitochondrial small ribosomal subunit	1	1	0.171293	0.577375	F2CVM4
GO:0005887	integral component of plasma membrane	1	1	0.171293	0.577375	F2CWF3
GO:0008076	voltage-gated potassium channel complex	1	1	0.171293	0.577375	F2CWF3
GO:0009341	beta-galactosidase complex	1	1	0.171293	0.577375	A0A8I6XUU4
GO:0009376	HslUV protease complex	1	1	0.171293	0.577375	F2DUR4
GO:0009513	etioplast	1	1	0.171293	0.577375	F2DXG7
GO:0009524	phragmoplast	1	1	0.171293	0.577375	A0A8I6XJN9
GO:0009569	chloroplast starch grain	1	1	0.171293	0.577375	F2E3X1
GO:0010005	cortical microtubule, transverse to long axis	1	1	0.171293	0.577375	F2E2M2
GO:0030426	growth cone	1	1	0.171293	0.577375	A0A8I6ZAC4
GO:0030427	site of polarized growth	1	1	0.171293	0.577375	A0A8I6ZAC4
GO:0030981	cortical microtubule cytoskeleton	1	1	0.171293	0.577375	F2E2M2
GO:0031226	intrinsic component of plasma membrane	1	1	0.171293	0.577375	F2CWF3
GO:0031588	nucleotide-activated protein kinase complex	1	1	0.171293	0.577375	F2E3X1
GO:0032044	DSIF complex	1	1	0.171293	0.577375	F2EJZ7
GO:0032584	growth cone membrane	1	1	0.171293	0.577375	A0A8I6ZAC4
GO:0032586	protein storage vacuole membrane	1	1	0.171293	0.577375	A0A287Q7U2
GO:0033116	endoplasmic reticulum-Golgi intermediate compartment membrane	1	1	0.171293	0.577375	F2ED67
GO:0033597	mitotic checkpoint complex	1	1	0.171293	0.577375	A0A8I6XJN9
GO:0034425	etioplast envelope	1	1	0.171293	0.577375	F2DXG7
GO:0034426	etioplast membrane	1	1	0.171293	0.577375	F2DXG7
GO:0034702	ion channel complex	1	1	0.171293	0.577375	F2CWF3
GO:0034703	cation channel complex	1	1	0.171293	0.577375	F2CWF3
GO:0034705	potassium channel complex	1	1	0.171293	0.577375	F2CWF3
GO:0035101	FACT complex	1	1	0.171293	0.577375	A0A287EZS0
GO:0044463	cell projection part	1	1	0.171293	0.577375	A0A8I6ZAC4
GO:0055028	cortical microtubule	1	1	0.171293	0.577375	F2E2M2
GO:0097550	transcriptional preinitiation complex	1	1	0.171293	0.577375	F2ECG8
GO:1990230	iron-sulfur cluster transfer complex	1	1	0.171293	0.577375	F2E4D2
GO:1990298	bub1-bub3 complex	1	1	0.171293	0.577375	A0A8I6XJN9
GO:0030118	clathrin coat	5	18	0.182174	0.605559	A0A8I6WHM6;A0A8I6XZV6;A0A8I6YC75;A0A8I6Z7P9;F2DKP3
GO:0005744	mitochondrial inner membrane presequence translocase complex	3	9	0.188947	0.605559	A0A8I6WIA9;F2DIG1;F2E405
GO:0009707	chloroplast outer membrane	3	9	0.188947	0.605559	F2DXG7;F2DZG4;F2DZK7
GO:0030131	clathrin adaptor complex	3	9	0.188947	0.605559	A0A8I6WHM6;A0A8I6YC75;F2DKP3
GO:0045261	proton-transporting ATP synthase complex, catalytic core F(1)	3	9	0.188947	0.605559	A0A8I7B5T8;F2CWQ6;F2DJJ2
GO:0070069	cytochrome complex	3	9	0.188947	0.605559	F2DIN7;F2DMM2;F2E2B0
GO:0009514	glyoxysome	2	5	0.205105	0.623556	A0A8I6XFM0;F2CPL2
GO:0030686	90S preribosome	2	5	0.205105	0.623556	A0A8I6X472;F2EG94
GO:0042995	cell projection	2	5	0.205105	0.623556	A0A8I6ZAC4;F2E3M7
GO:0043005	neuron projection	2	5	0.205105	0.623556	A0A8I6ZAC4;F2E3M7
GO:0055037	recycling endosome	2	5	0.205105	0.623556	A0A287LRJ1;F2CV36
GO:0097458	neuron part	2	5	0.205105	0.623556	A0A8I6ZAC4;F2E3M7
GO:0036452	ESCRT complex	4	14	0.20732	0.623556	F2CT83;F2D2Z9;F2DP42;F2DVS7
GO:0098797	plasma membrane protein complex	4	14	0.20732	0.623556	A0A8I6XZV6;A0A8I6Z7P9;F2CWF3;M0XN08
GO:0043231	intracellular membrane-bounded organelle	285	1615	0.208958	0.623683	A0A0U2GJJ3;A0A0U2GJL1;A0A287EZS0;A0A287LRJ1;A0A287Q7U2;A0A287SCX5;A0A287U5M5;A0A287WWM4;A0A2P1AB13;A0A3S9KBF3;A0A8I6WDR3;A0A8I6WDS1;A0A8I6WDV9;A0A8I6WEH2;A0A8I6WF91;A0A8I6WFJ6;A0A8I6WG88;A0A8I6WGG3;A0A8I6WHD1;A0A8I6WHE5;A0A8I6WHM6;A0A8I6WIA9;A0A8I6WIT4;A0A8I6WKG3;A0A8I6WKM0;A0A8I6WKT1;A0A8I6WM61;A0A8I6WMI1;A0A8I6WMP9;A0A8I6WQV8;A0A8I6WR25;A0A8I6WRJ2;A0A8I6WT04;A0A8I6WT13;A0A8I6WTI3;A0A8I6WTJ0;A0A…
GO:1990904	ribonucleoprotein complex	51	270	0.232593	0.674211	A0A8I6WDS1;A0A8I6WFJ6;A0A8I6WL52;A0A8I6X1I1;A0A8I6X472;A0A8I6XD40;A0A8I6XEW3;A0A8I6XF02;A0A8I6XQQ9;A0A8I6Y6M4;A0A8I6YF06;F2CQY5;F2CRA3;F2CRW7;F2CS15;F2CS23;F2CSX2;F2CT73;F2CVM4;F2CWN4;F2CZ65;F2D1K5;F2D205;F2D293;F2D2Y2;F2D483;F2D4K2;F2D558;F2D6M6;F2D702;F2D788;F2DAK3;F2DAU4;F2DBW7;F2DDD5;F2DE93;F2DFA6;F2DHN5;F2DIA6;F2DIR3;F2DP88;F2DXD4;F2DZY3;F2E0C0;F2E4I7;F2E556;F2ECK7;F2EFR1;F2EG94;F2EIG1;Q9XHS0
GO:0043227	membrane-bounded organelle	285	1620	0.235175	0.674211	A0A0U2GJJ3;A0A0U2GJL1;A0A287EZS0;A0A287LRJ1;A0A287Q7U2;A0A287SCX5;A0A287U5M5;A0A287WWM4;A0A2P1AB13;A0A3S9KBF3;A0A8I6WDR3;A0A8I6WDS1;A0A8I6WDV9;A0A8I6WEH2;A0A8I6WF91;A0A8I6WFJ6;A0A8I6WG88;A0A8I6WGG3;A0A8I6WHD1;A0A8I6WHE5;A0A8I6WHM6;A0A8I6WIA9;A0A8I6WIT4;A0A8I6WKG3;A0A8I6WKM0;A0A8I6WKT1;A0A8I6WM61;A0A8I6WMI1;A0A8I6WMP9;A0A8I6WQV8;A0A8I6WR25;A0A8I6WRJ2;A0A8I6WT04;A0A8I6WT13;A0A8I6WTI3;A0A8I6WTJ0;A0A…
GO:0005771	multivesicular body	3	10	0.23755	0.674211	F2CT83;F2D2Z9;F2DA66
GO:0009501	amyloplast	3	10	0.23755	0.674211	A0A2P1AB13;A0A8I7BFU9;C3W8L3
GO:0030119	AP-type membrane coat adaptor complex	3	10	0.23755	0.674211	A0A8I6WHM6;A0A8I6YC75;F2DKP3
GO:0033176	proton-transporting V-type ATPase complex	3	10	0.23755	0.674211	A0A8I6WDR3;A0A8I6X6Y8;F2CRK6
GO:0022626	cytosolic ribosome	18	88	0.237957	0.674211	F2CS23;F2CSX2;F2CT73;F2CZ65;F2D1K5;F2D293;F2D483;F2D558;F2D702;F2DAK3;F2DBW7;F2DFA6;F2DHN5;F2DIR3;F2E0C0;F2E556;F2EG94;Q9XHS0
GO:0010008	endosome membrane	8	35	0.240248	0.675805	A0A287LRJ1;A0A8I6X8X0;F2CT83;F2CV36;F2CYK2;F2D2Z9;F2DP42;F2DVS7
GO:0044444	cytoplasmic part	270	1535	0.251365	0.684351	A0A0U2GJJ3;A0A0U2GJL1;A0A287GYL8;A0A287LRJ1;A0A287Q7U2;A0A287SCX5;A0A287WWM4;A0A2P1AB13;A0A3S9KBF3;A0A8I6W9A2;A0A8I6WC09;A0A8I6WDR3;A0A8I6WEH2;A0A8I6WF91;A0A8I6WG88;A0A8I6WGG3;A0A8I6WGX0;A0A8I6WHD1;A0A8I6WHE5;A0A8I6WHM6;A0A8I6WIA9;A0A8I6WKM0;A0A8I6WL52;A0A8I6WM61;A0A8I6WMI1;A0A8I6WMP9;A0A8I6WQV8;A0A8I6WR25;A0A8I6WRJ2;A0A8I6WT04;A0A8I6WT13;A0A8I6WTI3;A0A8I6WTJ0;A0A8I6WWA9;A0A8I6WXW1;A0A8I6X0Z2;A0A…
GO:0043234	protein complex	109	602	0.253563	0.684351	A0A287EZS0;A0A8I6WC09;A0A8I6WDR3;A0A8I6WDV9;A0A8I6WEH2;A0A8I6WF91;A0A8I6WGG3;A0A8I6WHM6;A0A8I6WIA9;A0A8I6WKT1;A0A8I6WMI1;A0A8I6WTI3;A0A8I6WV37;A0A8I6X0Z2;A0A8I6X313;A0A8I6X6Y8;A0A8I6X7G0;A0A8I6X7Q6;A0A8I6X8T5;A0A8I6X8X0;A0A8I6XE20;A0A8I6XEC2;A0A8I6XEM6;A0A8I6XEP7;A0A8I6XEW3;A0A8I6XFW5;A0A8I6XH22;A0A8I6XH57;A0A8I6XJN9;A0A8I6XQQ9;A0A8I6XUU4;A0A8I6XZV6;A0A8I6Y0T7;A0A8I6Y5Z0;A0A8I6Y871;A0A8I6Y8S1;A0A…
GO:0005777	peroxisome	12	57	0.261158	0.684351	A0A8I6WF91;A0A8I6WT04;A0A8I6XFM0;A0A8I6XRG5;A0A8I6XUQ8;A0A8I6YMC3;F2CPL2;F2CQV7;F2CVB4;F2CXT5;F2D1C6;F2DHZ5
GO:0042579	microbody	12	57	0.261158	0.684351	A0A8I6WF91;A0A8I6WT04;A0A8I6XFM0;A0A8I6XRG5;A0A8I6XUQ8;A0A8I6YMC3;F2CPL2;F2CQV7;F2CVB4;F2CXT5;F2D1C6;F2DHZ5
GO:0000813	ESCRT I complex	2	6	0.274345	0.684351	F2DP42;F2DVS7
GO:0000815	ESCRT III complex	2	6	0.274345	0.684351	F2CT83;F2D2Z9
GO:0005687	U4 snRNP	2	6	0.274345	0.684351	A0A8I6XEW3;F2DP88
GO:0008250	oligosaccharyltransferase complex	2	6	0.274345	0.684351	A0A8I6XH22;A0A8I7BII2
GO:0016471	vacuolar proton-transporting V-type ATPase complex	2	6	0.274345	0.684351	A0A8I6X6Y8;F2CRK6
GO:0045240	dihydrolipoyl dehydrogenase complex	2	6	0.274345	0.684351	A0A8I6WEH2;A0A8I6WGG3
GO:0045252	oxoglutarate dehydrogenase complex	2	6	0.274345	0.684351	A0A8I6WEH2;A0A8I6WGG3
GO:0098552	side of membrane	2	6	0.274345	0.684351	F2CT83;F2D2Z9
GO:0005634	nucleus	113	629	0.281527	0.684351	A0A287EZS0;A0A287U5M5;A0A8I6WDS1;A0A8I6WDV9;A0A8I6WFJ6;A0A8I6WHD1;A0A8I6WIA9;A0A8I6WIT4;A0A8I6WKG3;A0A8I6WKT1;A0A8I6WV37;A0A8I6WXW1;A0A8I6X017;A0A8I6X313;A0A8I6X472;A0A8I6X7G0;A0A8I6X7M2;A0A8I6X7Q6;A0A8I6X8T5;A0A8I6XBH2;A0A8I6XBL4;A0A8I6XEM6;A0A8I6XEW3;A0A8I6XF02;A0A8I6XFW5;A0A8I6XG35;A0A8I6XJN9;A0A8I6XKP9;A0A8I6XLR3;A0A8I6XQQ9;A0A8I6Y0T7;A0A8I6Y2P0;A0A8I6Y3M9;A0A8I6Y6M4;A0A8I6Y871;A0A8I6Y8S1;A0A…
GO:0005759	mitochondrial matrix	9	42	0.284463	0.684351	A0A8I6YB85;F2CRW7;F2CTS4;F2CVM4;F2CW22;F2CW53;F2DB07;F2DUR4;F2EIG1
GO:0009527	plastid outer membrane	3	11	0.287927	0.684351	F2DXG7;F2DZG4;F2DZK7
GO:0030529	intracellular ribonucleoprotein complex	46	248	0.292932	0.684351	A0A8I6WDS1;A0A8I6WFJ6;A0A8I6X1I1;A0A8I6X472;A0A8I6XEW3;A0A8I6XF02;A0A8I6XQQ9;A0A8I6Y6M4;A0A8I6YF06;F2CQY5;F2CRW7;F2CS15;F2CS23;F2CSX2;F2CT73;F2CVM4;F2CWN4;F2CZ65;F2D1K5;F2D205;F2D293;F2D2Y2;F2D483;F2D4K2;F2D558;F2D6M6;F2D702;F2D788;F2DAK3;F2DBW7;F2DDD5;F2DE93;F2DFA6;F2DHN5;F2DIR3;F2DP88;F2DXD4;F2DZY3;F2E0C0;F2E4I7;F2E556;F2ECK7;F2EFR1;F2EG94;F2EIG1;Q9XHS0
GO:0098805	whole membrane	28	147	0.295326	0.684351	A0A287LRJ1;A0A287Q7U2;A0A8I6WDR3;A0A8I6WF91;A0A8I6WHM6;A0A8I6WMI1;A0A8I6X6Y8;A0A8I6X8X0;A0A8I6XZV6;A0A8I6YC75;A0A8I6Z7P9;F2CRK6;F2CT83;F2CUF1;F2CV36;F2CYK2;F2D043;F2D2Z9;F2D8E6;F2D8X9;F2D966;F2DP42;F2DVS7;F2DXG7;F2DZG4;F2DZK7;F2ED67;M0XN08
GO:1990234	transferase complex	12	59	0.303469	0.684351	A0A8I6WEH2;A0A8I6WGG3;A0A8I6XEM6;A0A8I6XH22;A0A8I6Y5Z0;A0A8I7B654;A0A8I7BII2;F2D119;F2E3X1;F2E4D2;F2E4M8;M0WAP6
GO:0000274	mitochondrial proton-transporting ATP synthase, stator stalk	1	2	0.313296	0.684351	A0A8I6XE20
GO:0000346	transcription export complex	1	2	0.313296	0.684351	F2D6G3
GO:0000445	THO complex part of transcription export complex	1	2	0.313296	0.684351	F2D6G3
GO:0000775	chromosome, centromeric region	1	2	0.313296	0.684351	A0A8I6XJN9
GO:0000776	kinetochore	1	2	0.313296	0.684351	A0A8I6XJN9
GO:0001405	presequence translocase-associated import motor	1	2	0.313296	0.684351	F2DIG1
GO:0005669	transcription factor TFIID complex	1	2	0.313296	0.684351	A0A8I6XEM6
GO:0005881	cytoplasmic microtubule	1	2	0.313296	0.684351	F2E2M2
GO:0009654	photosystem II oxygen evolving complex	1	2	0.313296	0.684351	F2CRK1
GO:0009705	plant-type vacuole membrane	1	2	0.313296	0.684351	A0A287Q7U2
GO:0017102	methionyl glutamyl tRNA synthetase complex	1	2	0.313296	0.684351	M0XNG3
GO:0017177	glucosidase II complex	1	2	0.313296	0.684351	A0A8I6XH57
GO:0030424	axon	1	2	0.313296	0.684351	F2E3M7
GO:0030863	cortical cytoskeleton	1	2	0.313296	0.684351	F2E2M2
GO:0031415	NatA complex	1	2	0.313296	0.684351	M0WAP6
GO:0031510	SUMO activating enzyme complex	1	2	0.313296	0.684351	A0A8I7BF02
GO:0043036	starch grain	1	2	0.313296	0.684351	F2E3X1
GO:0045265	proton-transporting ATP synthase, stator stalk	1	2	0.313296	0.684351	A0A8I6XE20
GO:0071439	clathrin complex	1	2	0.313296	0.684351	A0A8I6XZV6
GO:0097361	CIA complex	1	2	0.313296	0.684351	A0A8I6YIK8
GO:1990415	Pex17p-Pex14p docking complex	1	2	0.313296	0.684351	A0A8I6WF91
GO:1990429	peroxisomal importomer complex	1	2	0.313296	0.684351	A0A8I6WF91
GO:0044445	cytosolic part	22	115	0.317262	0.689163	A0A8I6YIK8;A0A8I7BCM2;F2CS23;F2CSX2;F2CT73;F2CZ65;F2D1K5;F2D293;F2D483;F2D558;F2D702;F2DAK3;F2DBW7;F2DFA6;F2DHN5;F2DIR3;F2DUR4;F2E0C0;F2E4D2;F2E556;F2EG94;Q9XHS0
GO:0061695	transferase complex, transferring phosphorus-containing groups	4	17	0.330237	0.713385	A0A8I6XEM6;F2D119;F2E3X1;F2E4M8
GO:0005622	intracellular	407	2356	0.33727	0.713846	A0A0U2GJJ3;A0A0U2GJL1;A0A287EZS0;A0A287FP91;A0A287FZ34;A0A287GYL8;A0A287LRJ1;A0A287Q7U2;A0A287SCX5;A0A287U5M5;A0A287WWM4;A0A2P1AB13;A0A3S9KBF3;A0A8I6W9A2;A0A8I6WAB6;A0A8I6WB19;A0A8I6WC09;A0A8I6WDR3;A0A8I6WDS1;A0A8I6WDV9;A0A8I6WEH2;A0A8I6WF91;A0A8I6WFJ6;A0A8I6WG88;A0A8I6WGG3;A0A8I6WGX0;A0A8I6WHD1;A0A8I6WHE5;A0A8I6WHM6;A0A8I6WIA9;A0A8I6WIT4;A0A8I6WKG3;A0A8I6WKM0;A0A8I6WKT1;A0A8I6WL52;A0A8I6WM61;A0A…
GO:0044424	intracellular part	407	2356	0.33727	0.713846	A0A0U2GJJ3;A0A0U2GJL1;A0A287EZS0;A0A287FP91;A0A287FZ34;A0A287GYL8;A0A287LRJ1;A0A287Q7U2;A0A287SCX5;A0A287U5M5;A0A287WWM4;A0A2P1AB13;A0A3S9KBF3;A0A8I6W9A2;A0A8I6WAB6;A0A8I6WB19;A0A8I6WC09;A0A8I6WDR3;A0A8I6WDS1;A0A8I6WDV9;A0A8I6WEH2;A0A8I6WF91;A0A8I6WFJ6;A0A8I6WG88;A0A8I6WGG3;A0A8I6WGX0;A0A8I6WHD1;A0A8I6WHE5;A0A8I6WHM6;A0A8I6WIA9;A0A8I6WIT4;A0A8I6WKG3;A0A8I6WKM0;A0A8I6WKT1;A0A8I6WL52;A0A8I6WM61;A0A…
GO:0005732	small nucleolar ribonucleoprotein complex	3	12	0.338976	0.713846	F2CQY5;F2DDD5;F2DZY3
GO:0005758	mitochondrial intermembrane space	2	7	0.343231	0.713846	A0A8I6ZA75;F2CXT5
GO:0005769	early endosome	2	7	0.343231	0.713846	A0A8I6WHM6;F2DC93
GO:0030132	clathrin coat of coated pit	2	7	0.343231	0.713846	A0A8I6XZV6;A0A8I6Z7P9
GO:0031970	organelle envelope lumen	2	7	0.343231	0.713846	A0A8I6ZA75;F2CXT5
GO:0044440	endosomal part	8	39	0.348102	0.720147	A0A287LRJ1;A0A8I6X8X0;F2CT83;F2CV36;F2CYK2;F2D2Z9;F2DP42;F2DVS7
GO:0005768	endosome	14	73	0.365911	0.753007	A0A287LRJ1;A0A287Q7U2;A0A8I6WHM6;A0A8I6X8X0;A0A8I6XEC2;A0A8I7BCY8;F2CT83;F2CV36;F2CYK2;F2D2Z9;F2DA66;F2DC93;F2DP42;F2DVS7
GO:0098588	bounding membrane of organelle	47	262	0.384552	0.787223	A0A287LRJ1;A0A287Q7U2;A0A8I6WDR3;A0A8I6WF91;A0A8I6WHM6;A0A8I6WMI1;A0A8I6WRJ2;A0A8I6WWA9;A0A8I6X6Y8;A0A8I6X8X0;A0A8I6XEP7;A0A8I6XH22;A0A8I6XIU6;A0A8I6XLR3;A0A8I6XZV6;A0A8I6Y4H4;A0A8I6Y5Z0;A0A8I6YC75;A0A8I6YVL6;A0A8I6Z7P9;A0A8I7B654;A0A8I7BII2;F2CRK6;F2CSE2;F2CT83;F2CUF1;F2CV17;F2CV36;F2CYK2;F2D043;F2D2Z9;F2D8E6;F2D8X9;F2D966;F2DG80;F2DGG1;F2DLD7;F2DP42;F2DVC1;F2DVS7;F2DXG7;F2DZG4;F2DZK7;F2E298;F2E…
GO:0030125	clathrin vesicle coat	3	13	0.389764	0.793737	A0A8I6XZV6;A0A8I6YC75;A0A8I6Z7P9
GO:0015934	large ribosomal subunit	11	58	0.407303	0.817617	F2CRW7;F2CSX2;F2CT73;F2CZ65;F2D1K5;F2D293;F2D558;F2DAK3;F2DBW7;F2E0C0;F2EIG1
GO:0031902	late endosome membrane	2	8	0.409854	0.817617	A0A8I6X8X0;F2DVS7
GO:0033177	proton-transporting two-sector ATPase complex, proton-transporting domain	2	8	0.409854	0.817617	A0A8I6WDR3;A0A8I6XE20
GO:1990351	transporter complex	2	8	0.409854	0.817617	A0A8I6WF91;F2CWF3
GO:0000347	THO complex	1	3	0.43101	0.822232	F2D6G3
GO:0005960	glycine cleavage complex	1	3	0.43101	0.822232	F2DDV8
GO:0009368	endopeptidase Clp complex	1	3	0.43101	0.822232	F2E6T9
GO:0015030	Cajal body	1	3	0.43101	0.822232	F2E3M7
GO:0030121	AP-1 adaptor complex	1	3	0.43101	0.822232	A0A8I6YC75
GO:0033179	proton-transporting V-type ATPase, V0 domain	1	3	0.43101	0.822232	A0A8I6WDR3
GO:0098687	chromosomal region	1	3	0.43101	0.822232	A0A8I6XJN9
GO:1902911	protein kinase complex	1	3	0.43101	0.822232	F2E3X1
GO:0031969	chloroplast membrane	5	25	0.431094	0.822232	A0A287WWM4;F2DXG7;F2DZG4;F2DZK7;F2EBY7
GO:0005905	coated pit	2	9	0.47297	0.880427	A0A8I6XZV6;A0A8I6Z7P9
GO:0045239	tricarboxylic acid cycle enzyme complex	2	9	0.47297	0.880427	A0A8I6WEH2;A0A8I6WGG3
GO:0098589	membrane region	2	9	0.47297	0.880427	A0A8I6XZV6;A0A8I6Z7P9
GO:0033178	proton-transporting two-sector ATPase complex, catalytic domain	3	15	0.48764	0.880427	A0A8I7B5T8;F2CWQ6;F2DJJ2
GO:0044452	nucleolar part	3	15	0.48764	0.880427	F2CQY5;F2DDD5;F2DZY3
GO:0031974	membrane-enclosed lumen	31	178	0.491331	0.880427	A0A287EZS0;A0A8I6WT04;A0A8I6X472;A0A8I6XEM6;A0A8I6XJN9;A0A8I6Y4H4;A0A8I6YB85;A0A8I6YD95;A0A8I6ZA75;F2CQY5;F2CRG7;F2CRW7;F2CTS4;F2CVM4;F2CW22;F2CW53;F2CWG1;F2CXT5;F2D0W0;F2D3D5;F2DB07;F2DDD5;F2DUJ6;F2DUR4;F2DZY3;F2E3M7;F2E4M8;F2EHE1;F2EIG1;F2EJZ7;F2ELJ9
GO:0005774	vacuolar membrane	4	21	0.49646	0.880427	A0A287Q7U2;A0A8I6WDR3;A0A8I6X6Y8;F2CRK6
GO:0044437	vacuolar part	4	21	0.49646	0.880427	A0A287Q7U2;A0A8I6WDR3;A0A8I6X6Y8;F2CRK6
GO:0042170	plastid membrane	5	27	0.502856	0.880427	A0A287WWM4;F2DXG7;F2DZG4;F2DZK7;F2EBY7
GO:0005829	cytosol	94	547	0.506645	0.880427	A0A0U2GJJ3;A0A0U2GJL1;A0A287GYL8;A0A8I6W9A2;A0A8I6WGX0;A0A8I6WHD1;A0A8I6WHE5;A0A8I6WL52;A0A8I6WMP9;A0A8I6WR25;A0A8I6WT04;A0A8I6WXW1;A0A8I6X6J9;A0A8I6XBL4;A0A8I6XBW8;A0A8I6XD03;A0A8I6XHC6;A0A8I6XLS0;A0A8I6XPB3;A0A8I6XQX4;A0A8I6XSQ9;A0A8I6XWQ1;A0A8I6XWW8;A0A8I6Y0T7;A0A8I6Y2P0;A0A8I6Y3M9;A0A8I6YHZ7;A0A8I6YIK8;A0A8I6YT49;A0A8I6YWJ4;A0A8I6Z0L1;A0A8I7B2K7;A0A8I7B2U1;A0A8I7B4C5;A0A8I7B4F1;A0A8I7B659;A0A…
GO:0005737	cytoplasm	334	1948	0.510046	0.880427	A0A0U2GJJ3;A0A0U2GJL1;A0A287FP91;A0A287FZ34;A0A287GYL8;A0A287LRJ1;A0A287Q7U2;A0A287SCX5;A0A287WWM4;A0A2P1AB13;A0A3S9KBF3;A0A8I6W9A2;A0A8I6WAB6;A0A8I6WB19;A0A8I6WC09;A0A8I6WDR3;A0A8I6WEH2;A0A8I6WF91;A0A8I6WG88;A0A8I6WGG3;A0A8I6WGX0;A0A8I6WHD1;A0A8I6WHE5;A0A8I6WHM6;A0A8I6WIA9;A0A8I6WIT4;A0A8I6WKG3;A0A8I6WKM0;A0A8I6WL52;A0A8I6WM61;A0A8I6WMI1;A0A8I6WMP9;A0A8I6WQV8;A0A8I6WR25;A0A8I6WRJ2;A0A8I6WT04;A0A…
GO:0000159	protein phosphatase type 2A complex	1	4	0.528581	0.880427	F2CVE0
GO:0000276	mitochondrial proton-transporting ATP synthase complex, coupling factor F(o)	1	4	0.528581	0.880427	A0A8I6XE20
GO:0005784	Sec61 translocon complex	1	4	0.528581	0.880427	F2CV17
GO:0005785	signal recognition particle receptor complex	1	4	0.528581	0.880427	F2DVC1
GO:0005787	signal peptidase complex	1	4	0.528581	0.880427	A0A8I7B654
GO:0009521	photosystem	1	4	0.528581	0.880427	F2CRK1
GO:0009523	photosystem II	1	4	0.528581	0.880427	F2CRK1
GO:0030904	retromer complex	1	4	0.528581	0.880427	A0A8I6XEC2
GO:0031414	N-terminal protein acetyltransferase complex	1	4	0.528581	0.880427	M0WAP6
GO:0031597	cytosolic proteasome complex	1	4	0.528581	0.880427	F2DUR4
GO:0034719	SMN-Sm protein complex	1	4	0.528581	0.880427	A0A8I6XEW3
GO:0035145	exon-exon junction complex	1	4	0.528581	0.880427	A0A8I6Y871
GO:0044613	nuclear pore central transport channel	1	4	0.528581	0.880427	A0A8I6YEZ5
GO:0005623	cell	415	2422	0.528822	0.880427	A0A0U2GJJ3;A0A0U2GJL1;A0A287EZS0;A0A287FP91;A0A287FZ34;A0A287GYL8;A0A287LRJ1;A0A287P008;A0A287Q7U2;A0A287SCX5;A0A287U5M5;A0A287WWM4;A0A2P1AB13;A0A3S9KBF3;A0A8I6W9A2;A0A8I6WAB6;A0A8I6WB19;A0A8I6WC09;A0A8I6WDR3;A0A8I6WDS1;A0A8I6WDV9;A0A8I6WEH2;A0A8I6WF91;A0A8I6WFJ6;A0A8I6WG88;A0A8I6WGG3;A0A8I6WGX0;A0A8I6WHD1;A0A8I6WHE5;A0A8I6WHM6;A0A8I6WIA9;A0A8I6WIT4;A0A8I6WKG3;A0A8I6WKM0;A0A8I6WKT1;A0A8I6WL52;A0A…
GO:0044464	cell part	415	2422	0.528822	0.880427	A0A0U2GJJ3;A0A0U2GJL1;A0A287EZS0;A0A287FP91;A0A287FZ34;A0A287GYL8;A0A287LRJ1;A0A287P008;A0A287Q7U2;A0A287SCX5;A0A287U5M5;A0A287WWM4;A0A2P1AB13;A0A3S9KBF3;A0A8I6W9A2;A0A8I6WAB6;A0A8I6WB19;A0A8I6WC09;A0A8I6WDR3;A0A8I6WDS1;A0A8I6WDV9;A0A8I6WEH2;A0A8I6WF91;A0A8I6WFJ6;A0A8I6WG88;A0A8I6WGG3;A0A8I6WGX0;A0A8I6WHD1;A0A8I6WHE5;A0A8I6WHM6;A0A8I6WIA9;A0A8I6WIT4;A0A8I6WKG3;A0A8I6WKM0;A0A8I6WKT1;A0A8I6WL52;A0A…
GO:0005770	late endosome	2	10	0.531826	0.880427	A0A8I6X8X0;F2DVS7
GO:0005791	rough endoplasmic reticulum	2	10	0.531826	0.880427	F2CV17;F2DVC1
GO:0019773	proteasome core complex, alpha-subunit complex	2	10	0.531826	0.880427	A0MMD3;F2D894
GO:0030867	rough endoplasmic reticulum membrane	2	10	0.531826	0.880427	F2CV17;F2DVC1
GO:0032040	small-subunit processome	2	10	0.531826	0.880427	F2DZY3;F2EG94
GO:0030665	clathrin-coated vesicle membrane	3	16	0.533661	0.880427	A0A8I6XZV6;A0A8I6YC75;A0A8I6Z7P9
GO:0015630	microtubule cytoskeleton	5	28	0.537409	0.882885	A0A8I6X6U8;A0A8I6YCQ1;A0A8I6YKV1;A0A8I7BE90;F2E2M2
GO:0005730	nucleolus	7	40	0.541078	0.885195	A0A8I6X472;F2CQY5;F2CRG7;F2DDD5;F2DZY3;F2EHE1;F2ELJ9
GO:0043233	organelle lumen	29	171	0.558052	0.902632	A0A287EZS0;A0A8I6WT04;A0A8I6X472;A0A8I6XEM6;A0A8I6XJN9;A0A8I6Y4H4;A0A8I6YB85;A0A8I6YD95;F2CQY5;F2CRG7;F2CRW7;F2CTS4;F2CVM4;F2CW22;F2CW53;F2CWG1;F2D0W0;F2D3D5;F2DB07;F2DDD5;F2DUJ6;F2DUR4;F2DZY3;F2E3M7;F2E4M8;F2EHE1;F2EIG1;F2EJZ7;F2ELJ9
GO:0070013	intracellular organelle lumen	29	171	0.558052	0.902632	A0A287EZS0;A0A8I6WT04;A0A8I6X472;A0A8I6XEM6;A0A8I6XJN9;A0A8I6Y4H4;A0A8I6YB85;A0A8I6YD95;F2CQY5;F2CRG7;F2CRW7;F2CTS4;F2CVM4;F2CW22;F2CW53;F2CWG1;F2D0W0;F2D3D5;F2DB07;F2DDD5;F2DUJ6;F2DUR4;F2DZY3;F2E3M7;F2E4M8;F2EHE1;F2EIG1;F2EJZ7;F2ELJ9
GO:0005802	trans-Golgi network	4	23	0.573022	0.902632	A0A287LRJ1;A0A8I6WHM6;A0A8I7B2K7;F2CV36
GO:0005874	microtubule	4	23	0.573022	0.902632	A0A8I6X6U8;A0A8I6YCQ1;A0A8I6YKV1;F2E2M2
GO:0035770	ribonucleoprotein granule	4	23	0.573022	0.902632	A0A8I6X1I1;A0A8I6YF06;F2D6M6;F2E4I7
GO:0036464	cytoplasmic ribonucleoprotein granule	4	23	0.573022	0.902632	A0A8I6X1I1;A0A8I6YF06;F2D6M6;F2E4I7
GO:0005789	endoplasmic reticulum membrane	18	107	0.575777	0.902632	A0A8I6WRJ2;A0A8I6WWA9;A0A8I6X8X0;A0A8I6XEP7;A0A8I6XH22;A0A8I6XIU6;A0A8I6Y4H4;A0A8I6Y5Z0;A0A8I6YVL6;A0A8I7B654;A0A8I7BII2;F2CSE2;F2CV17;F2DG80;F2DGG1;F2DVC1;F2E3J0;F2ED67
GO:0042175	nuclear outer membrane-endoplasmic reticulum membrane network	18	107	0.575777	0.902632	A0A8I6WRJ2;A0A8I6WWA9;A0A8I6X8X0;A0A8I6XEP7;A0A8I6XH22;A0A8I6XIU6;A0A8I6Y4H4;A0A8I6Y5Z0;A0A8I6YVL6;A0A8I7B654;A0A8I7BII2;F2CSE2;F2CV17;F2DG80;F2DGG1;F2DVC1;F2E3J0;F2ED67
GO:0005685	U1 snRNP	3	17	0.577251	0.902632	A0A8I6XEW3;F2DE93;F2DP88
GO:0005682	U5 snRNP	2	11	0.586025	0.902632	A0A8I6XEW3;F2DP88
GO:0005793	endoplasmic reticulum-Golgi intermediate compartment	2	11	0.586025	0.902632	A0A8I6X2Y8;F2ED67
GO:0022625	cytosolic large ribosomal subunit	9	54	0.593524	0.902632	F2CSX2;F2CT73;F2CZ65;F2D1K5;F2D293;F2D558;F2DAK3;F2DBW7;F2E0C0
GO:0009579	thylakoid	6	36	0.599115	0.902632	A0A8I6XD40;A0A8I6XMW6;F2CRA3;F2CRK1;F2DJJ2;F2DSZ9
GO:0099512	supramolecular fiber	4	24	0.608754	0.902632	A0A8I6X6U8;A0A8I6YCQ1;A0A8I6YKV1;F2E2M2
GO:0099513	polymeric cytoskeletal fiber	4	24	0.608754	0.902632	A0A8I6X6U8;A0A8I6YCQ1;A0A8I6YKV1;F2E2M2
GO:0000118	histone deacetylase complex	1	5	0.60945	0.902632	A0A8I6YD95
GO:0000325	plant-type vacuole	1	5	0.60945	0.902632	A0A287Q7U2
GO:0005742	mitochondrial outer membrane translocase complex	1	5	0.60945	0.902632	F2D966
GO:0008287	protein serine/threonine phosphatase complex	1	5	0.60945	0.902632	F2CVE0
GO:0016281	eukaryotic translation initiation factor 4F complex	1	5	0.60945	0.902632	A0A8I6WC09
GO:0034098	VCP-NPL4-UFD1 AAA ATPase complex	1	5	0.60945	0.902632	A0A8I6XEP7
GO:0045263	proton-transporting ATP synthase complex, coupling factor F(o)	1	5	0.60945	0.902632	A0A8I6XE20
GO:0071256	translocon complex	1	5	0.60945	0.902632	F2CV17
GO:1902495	transmembrane transporter complex	1	5	0.60945	0.902632	F2CWF3
GO:1903293	phosphatase complex	1	5	0.60945	0.902632	F2CVE0
GO:0000428	DNA-directed RNA polymerase complex	2	12	0.635435	0.924988	A0A8I6XEM6;F2E4M8
GO:0016591	DNA-directed RNA polymerase II, holoenzyme	2	12	0.635435	0.924988	A0A8I6XEM6;F2E4M8
GO:0030880	RNA polymerase complex	2	12	0.635435	0.924988	A0A8I6XEM6;F2E4M8
GO:0055029	nuclear DNA-directed RNA polymerase complex	2	12	0.635435	0.924988	A0A8I6XEM6;F2E4M8
GO:0044432	endoplasmic reticulum part	21	130	0.656057	0.924988	A0A8I6WMI1;A0A8I6WRJ2;A0A8I6WWA9;A0A8I6X8X0;A0A8I6XEP7;A0A8I6XH22;A0A8I6XH57;A0A8I6XIU6;A0A8I6Y4H4;A0A8I6Y5Z0;A0A8I6YVL6;A0A8I7B654;A0A8I7BII2;F2CSE2;F2CV17;F2CWG1;F2DG80;F2DGG1;F2DVC1;F2E3J0;F2ED67
GO:0030684	preribosome	3	19	0.656362	0.924988	A0A8I6X472;F2DZY3;F2EG94
GO:0030134	ER to Golgi transport vesicle	5	32	0.662858	0.924988	A0A8I6WMI1;A0A8I6WTJ0;A0A8I6X2Y8;A0A8I6X8X0;F2ED67
GO:0034357	photosynthetic membrane	4	26	0.674458	0.924988	A0A8I6XD40;A0A8I6XMW6;F2CRA3;F2CRK1
GO:0042651	thylakoid membrane	4	26	0.674458	0.924988	A0A8I6XD40;A0A8I6XMW6;F2CRA3;F2CRK1
GO:0044436	thylakoid part	4	26	0.674458	0.924988	A0A8I6XD40;A0A8I6XMW6;F2CRA3;F2CRK1
GO:0005786	signal recognition particle, endoplasmic reticulum targeting	1	6	0.676471	0.924988	F2CWN4
GO:0030139	endocytic vesicle	1	6	0.676471	0.924988	A0A287Q7U2
GO:0031428	box C/D snoRNP complex	1	6	0.676471	0.924988	F2DZY3
GO:0048500	signal recognition particle	1	6	0.676471	0.924988	F2CWN4
GO:0089701	U2AF	1	6	0.676471	0.924988	F2D205
GO:0098799	outer mitochondrial membrane protein complex	1	6	0.676471	0.924988	F2D966
GO:0005773	vacuole	10	64	0.678373	0.924988	A0A287Q7U2;A0A287SCX5;A0A8I6WDR3;A0A8I6WG88;A0A8I6X6Y8;A0A8I6YTI2;B4ESE6;F2CRK6;F2CWG0;F2DDC9
GO:0005788	endoplasmic reticulum lumen	2	13	0.680103	0.924988	A0A8I6Y4H4;F2CWG1
GO:0044438	microbody part	2	13	0.680103	0.924988	A0A8I6WF91;A0A8I6WT04
GO:0044439	peroxisomal part	2	13	0.680103	0.924988	A0A8I6WF91;A0A8I6WT04
GO:0000932	cytoplasmic mRNA processing body	3	20	0.69171	0.924988	A0A8I6X1I1;A0A8I6YF06;F2D6M6
GO:0030136	clathrin-coated vesicle	3	20	0.69171	0.924988	A0A8I6XZV6;A0A8I6YC75;A0A8I6Z7P9
GO:0097526	spliceosomal tri-snRNP complex	3	20	0.69171	0.924988	A0A8I6WFJ6;A0A8I6XEW3;F2DP88
GO:0098791	Golgi subcompartment	4	27	0.704302	0.924988	A0A287LRJ1;A0A8I6WHM6;A0A8I7B2K7;F2CV36
GO:0031981	nuclear lumen	17	109	0.70703	0.924988	A0A287EZS0;A0A8I6X472;A0A8I6XEM6;A0A8I6XJN9;A0A8I6YD95;F2CQY5;F2CRG7;F2D0W0;F2D3D5;F2DDD5;F2DUJ6;F2DZY3;F2E3M7;F2E4M8;F2EHE1;F2EJZ7;F2ELJ9
GO:0000139	Golgi membrane	11	72	0.711661	0.924988	A0A287LRJ1;A0A287Q7U2;A0A8I6WHM6;A0A8I6XLR3;A0A8I6XZV6;A0A8I6YC75;A0A8I6Z7P9;F2CV36;F2CYK2;F2DLD7;F2E298
GO:0005852	eukaryotic translation initiation factor 3 complex	2	14	0.7202	0.924988	F2D788;F2DXD4
GO:0008540	proteasome regulatory particle, base subcomplex	2	14	0.7202	0.924988	A0A8I6Y0T7;F2DC74
GO:0016282	eukaryotic 43S preinitiation complex	2	14	0.7202	0.924988	F2D788;F2DXD4
GO:0046540	U4/U6 x U5 tri-snRNP complex	2	14	0.7202	0.924988	A0A8I6WFJ6;F2DP88
GO:0012507	ER to Golgi transport vesicle membrane	3	21	0.724252	0.924988	A0A8I6WMI1;A0A8I6X8X0;F2ED67
GO:0000015	phosphopyruvate hydratase complex	1	7	0.732011	0.924988	A0A8I7BCM2
GO:0000243	commitment complex	1	7	0.732011	0.924988	A0A8I6XEW3
GO:0000974	Prp19 complex	1	7	0.732011	0.924988	A0A8I6XQQ9
GO:0005665	DNA-directed RNA polymerase II, core complex	1	7	0.732011	0.924988	F2E4M8
GO:0005778	peroxisomal membrane	1	7	0.732011	0.924988	A0A8I6WF91
GO:0005782	peroxisomal matrix	1	7	0.732011	0.924988	A0A8I6WT04
GO:0031903	microbody membrane	1	7	0.732011	0.924988	A0A8I6WF91
GO:0031907	microbody lumen	1	7	0.732011	0.924988	A0A8I6WT04
GO:0034715	pICln-Sm protein complex	1	7	0.732011	0.924988	A0A8I6XEW3
GO:0045254	pyruvate dehydrogenase complex	1	7	0.732011	0.924988	A0A8I6YFN2
GO:0090575	RNA polymerase II transcription factor complex	1	7	0.732011	0.924988	A0A8I6XEM6
GO:0009941	chloroplast envelope	5	35	0.741083	0.924988	A0A287WWM4;F2DXG7;F2DZG4;F2DZK7;F2EBY7
GO:0005911	cell-cell junction	4	29	0.757925	0.924988	A0A8I6WG88;A0A8I6XZV6;A0A8I7B2D2;F2DE94
GO:0009506	plasmodesma	4	29	0.757925	0.924988	A0A8I6WG88;A0A8I6XZV6;A0A8I7B2D2;F2DE94
GO:0030054	cell junction	4	29	0.757925	0.924988	A0A8I6WG88;A0A8I6XZV6;A0A8I7B2D2;F2DE94
GO:0055044	symplast	4	29	0.757925	0.924988	A0A8I6WG88;A0A8I6XZV6;A0A8I7B2D2;F2DE94
GO:0012506	vesicle membrane	9	62	0.759622	0.924988	A0A287LRJ1;A0A8I6WHM6;A0A8I6WMI1;A0A8I6X8X0;A0A8I6XZV6;A0A8I6YC75;A0A8I6Z7P9;F2CV36;F2ED67
GO:0030659	cytoplasmic vesicle membrane	9	62	0.759622	0.924988	A0A287LRJ1;A0A8I6WHM6;A0A8I6WMI1;A0A8I6X8X0;A0A8I6XZV6;A0A8I6YC75;A0A8I6Z7P9;F2CV36;F2ED67
GO:0005783	endoplasmic reticulum	35	225	0.769965	0.924988	A0A8I6WMI1;A0A8I6WMP9;A0A8I6WR25;A0A8I6WRJ2;A0A8I6WTJ0;A0A8I6WWA9;A0A8I6X2Y8;A0A8I6X8X0;A0A8I6XEP7;A0A8I6XH22;A0A8I6XH57;A0A8I6XIU6;A0A8I6Y4H4;A0A8I6Y5Z0;A0A8I6YME5;A0A8I6YVL6;A0A8I7B654;A0A8I7BAE7;A0A8I7BII2;F2CSE2;F2CV17;F2CWG1;F2CWN4;F2D9Q6;F2DG80;F2DGG1;F2DIG1;F2DVC1;F2DZK7;F2E376;F2E3J0;F2E422;F2E4D2;F2E5P4;F2ED67
GO:0016023	cytoplasmic, membrane-bounded vesicle	12	82	0.771634	0.924988	A0A287LRJ1;A0A287Q7U2;A0A8I6WHM6;A0A8I6WMI1;A0A8I6WTJ0;A0A8I6X2Y8;A0A8I6X8X0;A0A8I6XZV6;A0A8I6YC75;A0A8I6Z7P9;F2CV36;F2ED67
GO:0000151	ubiquitin ligase complex	1	8	0.778033	0.924988	A0A8I6Y5Z0
GO:0005667	transcription factor complex	1	8	0.778033	0.924988	A0A8I6XEM6
GO:0005688	U6 snRNP	1	8	0.778033	0.924988	A0A8I6WFJ6
GO:0005689	U12-type spliceosomal complex	1	8	0.778033	0.924988	A0A8I6XEW3
GO:0009528	plastid inner membrane	1	8	0.778033	0.924988	F2EBY7
GO:0009706	chloroplast inner membrane	1	8	0.778033	0.924988	F2EBY7
GO:0044798	nuclear transcription factor complex	1	8	0.778033	0.924988	A0A8I6XEM6
GO:0044428	nuclear part	35	226	0.779241	0.924988	A0A287EZS0;A0A8I6WDS1;A0A8I6WFJ6;A0A8I6WIT4;A0A8I6X472;A0A8I6X7Q6;A0A8I6XEM6;A0A8I6XEW3;A0A8I6XF02;A0A8I6XFW5;A0A8I6XJN9;A0A8I6XQQ9;A0A8I6Y6M4;A0A8I6Y871;A0A8I6YD95;A0A8I6YEZ5;A0A8I6YUS4;A0A8I7BF02;F2CQY5;F2CRG7;F2D0W0;F2D205;F2D3D5;F2D6G3;F2DDD5;F2DE93;F2DP88;F2DUJ6;F2DZY3;F2E3M7;F2E4I7;F2E4M8;F2EHE1;F2EJZ7;F2ELJ9
GO:0009535	chloroplast thylakoid membrane	3	23	0.781204	0.924988	A0A8I6XD40;A0A8I6XMW6;F2CRA3
GO:0055035	plastid thylakoid membrane	3	23	0.781204	0.924988	A0A8I6XD40;A0A8I6XMW6;F2CRA3
GO:0009534	chloroplast thylakoid	4	30	0.78177	0.924988	A0A8I6XD40;A0A8I6XMW6;F2CRA3;F2DSZ9
GO:0031976	plastid thylakoid	4	30	0.78177	0.924988	A0A8I6XD40;A0A8I6XMW6;F2CRA3;F2DSZ9
GO:0005856	cytoskeleton	8	57	0.78544	0.924988	A0A8I6X6U8;A0A8I6YCQ1;A0A8I6YKQ7;A0A8I6YKV1;A0A8I7BE90;F2D484;F2D4P0;F2E2M2
GO:0031984	organelle subcompartment	8	57	0.78544	0.924988	A0A287LRJ1;A0A8I6WHM6;A0A8I6XD40;A0A8I6XMW6;A0A8I7B2K7;F2CRA3;F2CV36;F2DSZ9
GO:0033290	eukaryotic 48S preinitiation complex	2	16	0.787738	0.924988	F2D788;F2DXD4
GO:0070993	translation preinitiation complex	2	16	0.787738	0.924988	F2D788;F2DXD4
GO:0030117	membrane coat	6	44	0.790264	0.924988	A0A8I6WHM6;A0A8I6WMI1;A0A8I6XZV6;A0A8I6YC75;A0A8I6Z7P9;F2DKP3
GO:0048475	coated membrane	6	44	0.790264	0.924988	A0A8I6WHM6;A0A8I6WMI1;A0A8I6XZV6;A0A8I6YC75;A0A8I6Z7P9;F2DKP3
GO:0009536	plastid	33	215	0.791112	0.924988	A0A287WWM4;A0A2P1AB13;A0A3S9KBF3;A0A8I6WM61;A0A8I6X6P0;A0A8I6XAM1;A0A8I6XD40;A0A8I6XMW6;A0A8I6XNX9;A0A8I6XUG0;A0A8I6XUK6;A0A8I6XZV6;A0A8I6YHI9;A0A8I6YQU0;A0A8I7BFU9;C3W8L3;F2CRA3;F2CS15;F2CTS4;F2CVA4;F2CW53;F2D643;F2DC91;F2DMT1;F2DSZ9;F2DXG7;F2DZG4;F2DZK7;F2E0W3;F2E3X1;F2E6T9;F2EBY7;F2ELT5
GO:0000502	proteasome complex	7	51	0.795884	0.924988	A0A8I6Y0T7;A0A8I6Y5Z0;A0MMD3;F2D894;F2DC74;F2DJW8;F2DUR4
GO:0031988	membrane-bounded vesicle	12	84	0.79992	0.924988	A0A287LRJ1;A0A287Q7U2;A0A8I6WHM6;A0A8I6WMI1;A0A8I6WTJ0;A0A8I6X2Y8;A0A8I6X8X0;A0A8I6XZV6;A0A8I6YC75;A0A8I6Z7P9;F2CV36;F2ED67
GO:0009507	chloroplast	30	198	0.805182	0.924988	A0A287WWM4;A0A2P1AB13;A0A3S9KBF3;A0A8I6WM61;A0A8I6X6P0;A0A8I6XAM1;A0A8I6XD40;A0A8I6XMW6;A0A8I6XNX9;A0A8I6XUK6;A0A8I6XZV6;A0A8I6YHI9;A0A8I6YQU0;C3W8L3;F2CRA3;F2CS15;F2CTS4;F2CVA4;F2CW53;F2D643;F2DC91;F2DMT1;F2DSZ9;F2DXG7;F2DZG4;F2DZK7;F2E0W3;F2E3X1;F2EBY7;F2ELT5
GO:0031201	SNARE complex	3	24	0.80584	0.924988	A0A8I6X8X0;F2DRI5;F2E298
GO:0044433	cytoplasmic vesicle part	9	65	0.807833	0.924988	A0A287LRJ1;A0A8I6WHM6;A0A8I6WMI1;A0A8I6X8X0;A0A8I6XZV6;A0A8I6YC75;A0A8I6Z7P9;F2CV36;F2ED67
GO:0031410	cytoplasmic vesicle	12	85	0.813078	0.924988	A0A287LRJ1;A0A287Q7U2;A0A8I6WHM6;A0A8I6WMI1;A0A8I6WTJ0;A0A8I6X2Y8;A0A8I6X8X0;A0A8I6XZV6;A0A8I6YC75;A0A8I6Z7P9;F2CV36;F2ED67
GO:0005686	U2 snRNP	2	17	0.815803	0.924988	A0A8I6XEW3;F2DP88
GO:0005839	proteasome core complex	2	17	0.815803	0.924988	A0MMD3;F2D894
GO:0031248	protein acetyltransferase complex	1	9	0.816166	0.924988	M0WAP6
GO:0048471	perinuclear region of cytoplasm	1	9	0.816166	0.924988	A0A8I6YT49
GO:1902493	acetyltransferase complex	1	9	0.816166	0.924988	M0WAP6
GO:0005654	nucleoplasm	9	66	0.822187	0.925633	A0A287EZS0;A0A8I6XEM6;A0A8I6XJN9;A0A8I6YD95;F2D3D5;F2DUJ6;F2E3M7;F2E4M8;F2EJZ7
GO:0005798	Golgi-associated vesicle	4	32	0.823837	0.925633	A0A8I6WHM6;A0A8I6XZV6;A0A8I6YC75;A0A8I6Z7P9
GO:0030660	Golgi-associated vesicle membrane	4	32	0.823837	0.925633	A0A8I6WHM6;A0A8I6XZV6;A0A8I6YC75;A0A8I6Z7P9
GO:0012505	endomembrane system	67	429	0.835034	0.935526	A0A0U2GJJ3;A0A0U2GJL1;A0A287LRJ1;A0A287Q7U2;A0A287SCX5;A0A8I6WHM6;A0A8I6WIT4;A0A8I6WMI1;A0A8I6WMP9;A0A8I6WR25;A0A8I6WRJ2;A0A8I6WTJ0;A0A8I6WWA9;A0A8I6X2Y8;A0A8I6X8X0;A0A8I6XEC2;A0A8I6XEP7;A0A8I6XH22;A0A8I6XH57;A0A8I6XIU6;A0A8I6XLR3;A0A8I6XZV6;A0A8I6Y4H4;A0A8I6Y5Z0;A0A8I6YC75;A0A8I6YEZ5;A0A8I6YME5;A0A8I6YVL6;A0A8I6Z7P9;A0A8I7B2K7;A0A8I7B654;A0A8I7BAE7;A0A8I7BCY8;A0A8I7BII2;F2CPX3;F2CRN1;F2CSE2;F2CT…
GO:0009526	plastid envelope	5	40	0.840391	0.938205	A0A287WWM4;F2DXG7;F2DZG4;F2DZK7;F2EBY7
GO:0044430	cytoskeletal part	4	33	0.842225	0.938205	A0A8I6X6U8;A0A8I6YCQ1;A0A8I6YKV1;F2E2M2
GO:0044434	chloroplast part	12	88	0.848708	0.942741	A0A287WWM4;A0A3S9KBF3;A0A8I6XD40;A0A8I6XMW6;A0A8I6YHI9;F2CRA3;F2DSZ9;F2DXG7;F2DZG4;F2DZK7;F2E3X1;F2EBY7
GO:0031982	vesicle	12	89	0.859346	0.94944	A0A287LRJ1;A0A287Q7U2;A0A8I6WHM6;A0A8I6WMI1;A0A8I6WTJ0;A0A8I6X2Y8;A0A8I6X8X0;A0A8I6XZV6;A0A8I6YC75;A0A8I6Z7P9;F2CV36;F2ED67
GO:0005794	Golgi apparatus	22	154	0.859596	0.94944	A0A0U2GJJ3;A0A0U2GJL1;A0A287LRJ1;A0A287Q7U2;A0A8I6WHM6;A0A8I6WMI1;A0A8I6X2Y8;A0A8I6X8X0;A0A8I6XLR3;A0A8I6XZV6;A0A8I6YC75;A0A8I6Z7P9;A0A8I7B2K7;A0A8I7BCY8;F2CRN1;F2CV36;F2CYK2;F2DE60;F2DLD7;F2E0U3;F2E298;F2E376
GO:0071011	precatalytic spliceosome	2	19	0.862167	0.949598	A0A8I6WFJ6;A0A8I6XEW3
GO:0070971	endoplasmic reticulum exit site	1	11	0.873932	0.959853	A0A8I6WMI1
GO:0044451	nucleoplasm part	6	50	0.881083	0.960418	A0A287EZS0;A0A8I6XEM6;A0A8I6YD95;F2E3M7;F2E4M8;F2EJZ7
GO:0015629	actin cytoskeleton	1	12	0.895614	0.960418	A0A8I6YKQ7
GO:0030127	COPII vesicle coat	1	12	0.895614	0.960418	A0A8I6WMI1
GO:0044435	plastid part	12	93	0.896141	0.960418	A0A287WWM4;A0A3S9KBF3;A0A8I6XD40;A0A8I6XMW6;A0A8I6YHI9;F2CRA3;F2DSZ9;F2DXG7;F2DZG4;F2DZK7;F2E3X1;F2EBY7
GO:0000323	lytic vacuole	2	21	0.897618	0.960418	B4ESE6;F2DDC9
GO:0005643	nuclear pore	2	21	0.897618	0.960418	A0A8I6WIT4;A0A8I6YEZ5
GO:0005764	lysosome	2	21	0.897618	0.960418	B4ESE6;F2DDC9
GO:0030135	coated vesicle	9	73	0.90072	0.960418	A0A8I6WHM6;A0A8I6WMI1;A0A8I6WTJ0;A0A8I6X2Y8;A0A8I6X8X0;A0A8I6XZV6;A0A8I6YC75;A0A8I6Z7P9;F2ED67
GO:0030662	coated vesicle membrane	7	59	0.901175	0.960418	A0A8I6WHM6;A0A8I6WMI1;A0A8I6X8X0;A0A8I6XZV6;A0A8I6YC75;A0A8I6Z7P9;F2ED67
GO:0005635	nuclear envelope	3	30	0.909294	0.960418	A0A8I6WIT4;A0A8I6YEZ5;F2E4I7
GO:0071013	catalytic step 2 spliceosome	3	30	0.909294	0.960418	A0A8I6XEW3;A0A8I6Y6M4;F2DP88
GO:0030120	vesicle coat	4	38	0.911614	0.960418	A0A8I6WMI1;A0A8I6XZV6;A0A8I6YC75;A0A8I6Z7P9
GO:0005618	cell wall	1	13	0.913573	0.960418	A0A8I6YF87
GO:0009505	plant-type cell wall	1	13	0.913573	0.960418	A0A8I6YF87
GO:0030312	external encapsulating structure	1	13	0.913573	0.960418	A0A8I6YF87
GO:0009570	chloroplast stroma	3	31	0.920606	0.960418	A0A3S9KBF3;A0A8I6XMW6;A0A8I6YHI9
GO:0005681	spliceosomal complex	8	69	0.924973	0.960418	A0A8I6WDS1;A0A8I6WFJ6;A0A8I6XEW3;A0A8I6XF02;A0A8I6XQQ9;A0A8I6Y6M4;F2D205;F2DP88
GO:0009532	plastid stroma	3	32	0.930616	0.960418	A0A3S9KBF3;A0A8I6XMW6;A0A8I6YHI9
GO:0044431	Golgi apparatus part	12	98	0.930664	0.960418	A0A287LRJ1;A0A287Q7U2;A0A8I6WHM6;A0A8I6XLR3;A0A8I6XZV6;A0A8I6YC75;A0A8I6Z7P9;A0A8I7B2K7;F2CV36;F2CYK2;F2DLD7;F2E298
GO:0005684	U2-type spliceosomal complex	2	24	0.93521	0.960418	A0A8I6XEW3;F2DP88
GO:0030532	small nuclear ribonucleoprotein complex	4	41	0.938803	0.960418	A0A8I6WFJ6;A0A8I6XEW3;F2DE93;F2DP88
GO:0097525	spliceosomal snRNP complex	4	41	0.938803	0.960418	A0A8I6WFJ6;A0A8I6XEW3;F2DE93;F2DP88
GO:0005615	extracellular space	3	33	0.939455	0.960418	A0A8I7BII4;B4ESE6;F2DDC9
GO:0016021	integral component of membrane	1	15	0.940768	0.960418	F2CWF3
GO:0031224	intrinsic component of membrane	1	15	0.940768	0.960418	F2CWF3
GO:0071004	U2-type prespliceosome	1	15	0.940768	0.960418	F2DP88
GO:0071010	prespliceosome	1	15	0.940768	0.960418	F2DP88
GO:0044421	extracellular region part	3	35	0.954093	0.971485	A0A8I7BII4;B4ESE6;F2DDC9
GO:0005838	proteasome regulatory particle	2	28	0.965414	0.97792	A0A8I6Y0T7;F2DC74
GO:0022624	proteasome accessory complex	2	28	0.965414	0.97792	A0A8I6Y0T7;F2DC74
GO:0016604	nuclear body	1	20	0.976998	0.987097	F2E3M7
GO:0030137	COPI-coated vesicle	1	25	0.991085	0.99618	A0A8I6WHM6
GO:0030663	COPI-coated vesicle membrane	1	25	0.991085	0.99618	A0A8I6WHM6
GO:0005576	extracellular region	14	139	0.994126	0.996675	A0A287DTW3;A0A287PY01;A0A8I6WHB0;A0A8I6WJN4;A0A8I6XXC3;A0A8I6Y180;A0A8I6Y7Y1;A0A8I6YF87;A0A8I6YHJ3;A0A8I7B6N5;A0A8I7BII4;B4ESE6;F2DDC9;Q42835
GO:0005575	cellular_component	469	2738	1	1	A0A0U2GJJ3;A0A0U2GJL1;A0A287DTW3;A0A287EZS0;A0A287FP91;A0A287FZ34;A0A287GYL8;A0A287JEP8;A0A287LRJ1;A0A287NWK0;A0A287P008;A0A287PY01;A0A287Q7U2;A0A287SCX5;A0A287U5M5;A0A287WWM4;A0A2P1AB13;A0A3S9KBF3;A0A8I6W9A2;A0A8I6WAB6;A0A8I6WB19;A0A8I6WC09;A0A8I6WD99;A0A8I6WDR3;A0A8I6WDS1;A0A8I6WDV9;A0A8I6WEH2;A0A8I6WF91;A0A8I6WFI5;A0A8I6WFJ6;A0A8I6WFT4;A0A8I6WG88;A0A8I6WGG3;A0A8I6WGX0;A0A8I6WHB0;A0A8I6WHD1;A0A…

## Sheet: MF
GO ID	Description	out (481)	All (2874)	pvalue	p.adjust	Genes
GO:0005244	voltage-gated ion channel activity	5	7	0.00201381	0.478615	F2CUF1;F2CWF3;F2D043;F2D8E6;F2DXG7
GO:0022832	voltage-gated channel activity	5	7	0.00201381	0.478615	F2CUF1;F2CWF3;F2D043;F2D8E6;F2DXG7
GO:0022836	gated channel activity	5	7	0.00201381	0.478615	F2CUF1;F2CWF3;F2D043;F2D8E6;F2DXG7
GO:0003714	transcription corepressor activity	4	5	0.00336603	0.512144	A0A8I7BEI9;F2DAW4;F2DXX0;F2EFK9
GO:0016618	hydroxypyruvate reductase activity	3	3	0.00466353	0.512144	A0A287GYL8;A0A8I6W9A2;F2CPN8
GO:0003677	DNA binding	32	126	0.00749449	0.512144	A0A287EZS0;A0A287JEP8;A0A8I6WDV9;A0A8I6WKT1;A0A8I6WV37;A0A8I6X313;A0A8I6X660;A0A8I6X7G0;A0A8I6X8T5;A0A8I6XDB4;A0A8I6XG35;A0A8I6XKP9;A0A8I6XLR3;A0A8I6XQQ9;A0A8I6XSQ9;A0A8I6Y8S1;A0A8I6YL06;A0A8I6YSL3;A0A8I7B8G7;A1XXI9;F2CUP3;F2CVL6;F2CW93;F2D0W0;F2DF61;F2DUJ6;F2DVN6;F2E4M8;F2ECG8;F2EHE1;F2EJV3;M0Y7Q2
GO:0005216	ion channel activity	5	9	0.00900447	0.512144	F2CUF1;F2CWF3;F2D043;F2D8E6;F2DXG7
GO:0005515	protein binding	81	391	0.0155763	0.512144	A0A287EZS0;A0A287JEP8;A0A287NWK0;A0A287U5M5;A0A8I6WB26;A0A8I6WDV9;A0A8I6WF91;A0A8I6WKG3;A0A8I6WKT1;A0A8I6WMI1;A0A8I6WMP9;A0A8I6WNS5;A0A8I6WR25;A0A8I6WV37;A0A8I6WXW1;A0A8I6X313;A0A8I6X6U8;A0A8I6X7G0;A0A8I6X8T5;A0A8I6X8X0;A0A8I6XBH2;A0A8I6XBL4;A0A8I6XCP7;A0A8I6XEP7;A0A8I6XJF2;A0A8I6XJN9;A0A8I6XWQ1;A0A8I6XZV6;A0A8I6Y0T7;A0A8I6Y2P0;A0A8I6Y4H4;A0A8I6Y5Z0;A0A8I6Y8S1;A0A8I6YC75;A0A8I6YCQ1;A0A8I6YD95;A0A…
GO:0003857	3-hydroxyacyl-CoA dehydrogenase activity	3	4	0.0163248	0.512144	A0A8I6XRG5;A0A8I6XUQ8;F2D1C6
GO:0030267	glyoxylate reductase (NADP) activity	3	4	0.0163248	0.512144	A0A287GYL8;A0A8I6W9A2;F2CPN8
GO:0016671	oxidoreductase activity, acting on a sulfur group of donors, disulfide as acceptor	4	7	0.0177634	0.512144	A0A8I6Y4Z6;F2CZC9;F2D9U3;Q7XZK3
GO:0019207	kinase regulator activity	4	7	0.0177634	0.512144	A0A8I6YIV5;F2DML2;F2DSZ9;F2E3X1
GO:0003735	structural constituent of ribosome	26	106	0.0235443	0.512144	F2CRW7;F2CS15;F2CS23;F2CSX2;F2CT73;F2CVM4;F2CZ65;F2D1K5;F2D293;F2D2Y2;F2D483;F2D4K2;F2D558;F2D702;F2DAK3;F2DBW7;F2DFA6;F2DHN5;F2DIR3;F2E0C0;F2E556;F2ECK7;F2EFR1;F2EG94;F2EIG1;Q9XHS0
GO:0003867	4-aminobutyrate transaminase activity	2	2	0.0279617	0.512144	A0A8I6YQI6;F2EDT9
GO:0003973	(S)-2-hydroxy-acid oxidase activity	2	2	0.0279617	0.512144	F2CQV7;F2DHZ5
GO:0004015	adenosylmethionine-8-amino-7-oxononanoate transaminase activity	2	2	0.0279617	0.512144	A0A8I6YQI6;F2EDT9
GO:0004665	prephenate dehydrogenase (NADP+) activity	2	2	0.0279617	0.512144	A0A8I6YFL0;A0A8I7BJR0
GO:0005548	phospholipid transporter activity	2	2	0.0279617	0.512144	F2CWC9;F2DGM5
GO:0008977	prephenate dehydrogenase activity	2	2	0.0279617	0.512144	A0A8I6YFL0;A0A8I7BJR0
GO:0016247	channel regulator activity	2	2	0.0279617	0.512144	A0A8I6XBH2;F2CWF3
GO:0016844	strictosidine synthase activity	2	2	0.0279617	0.512144	A0A287SCX5;F2CWG0
GO:0022843	voltage-gated cation channel activity	2	2	0.0279617	0.512144	F2CWF3;F2DXG7
GO:0033730	arogenate dehydrogenase (NADP+) activity	2	2	0.0279617	0.512144	A0A8I6YFL0;A0A8I7BJR0
GO:0035620	ceramide transporter activity	2	2	0.0279617	0.512144	F2CWC9;F2DGM5
GO:0044325	ion channel binding	2	2	0.0279617	0.512144	A0A8I6XBH2;F2CWF3
GO:0046624	sphingolipid transporter activity	2	2	0.0279617	0.512144	F2CWC9;F2DGM5
GO:0046625	sphingolipid binding	2	2	0.0279617	0.512144	F2CWC9;F2DGM5
GO:0097001	ceramide binding	2	2	0.0279617	0.512144	F2CWC9;F2DGM5
GO:1902387	ceramide 1-phosphate binding	2	2	0.0279617	0.512144	F2CWC9;F2DGM5
GO:1902388	ceramide 1-phosphate transporter activity	2	2	0.0279617	0.512144	F2CWC9;F2DGM5
GO:0098772	molecular function regulator	32	138	0.028196	0.512144	A0A287DTW3;A0A287FZ34;A0A8I6WHB0;A0A8I6WTQ8;A0A8I6XBH2;A0A8I6XWQ1;A0A8I6Y9X5;A0A8I6YIV5;A0A8I7B2K7;A0A8I7B659;A8V3Q1;A8V3Y1;F2CUF5;F2CVE0;F2CWF3;F2D8Y6;F2DAR0;F2DIG1;F2DML2;F2DSZ9;F2DZF2;F2E2B0;F2E3X1;F2E4D2;F2E5X4;F2E8J4;F2ELP4;M0V3S6;M0WNW4;M0XBS5;Q7XZK3;Q9M4C9
GO:0019900	kinase binding	4	8	0.0308927	0.512144	A0A8I6WXW1;F2CT56;F2CTS1;F2E3X1
GO:0016820	hydrolase activity, acting on acid anhydrides, catalyzing transmembrane movement of substances	10	32	0.0309196	0.512144	A0A8I6WDR3;A0A8I6X6Y8;A0A8I6XE20;A0A8I6XNJ0;A0A8I6XQR9;A0A8I7B5T8;F2CRK6;F2CWQ6;F2DJJ2;F2EF80
GO:0042626	ATPase activity, coupled to transmembrane movement of substances	10	32	0.0309196	0.512144	A0A8I6WDR3;A0A8I6X6Y8;A0A8I6XE20;A0A8I6XNJ0;A0A8I6XQR9;A0A8I7B5T8;F2CRK6;F2CWQ6;F2DJJ2;F2EF80
GO:0043492	ATPase activity, coupled to movement of substances	10	32	0.0309196	0.512144	A0A8I6WDR3;A0A8I6X6Y8;A0A8I6XE20;A0A8I6XNJ0;A0A8I6XQR9;A0A8I7B5T8;F2CRK6;F2CWQ6;F2DJJ2;F2EF80
GO:0043130	ubiquitin binding	13	46	0.0338746	0.512144	A0A287NWK0;A0A8I6WKG3;A0A8I6XEP7;A0A8I6XJN9;A0A8I6Y0T7;A0A8I6Y2P0;A0A8I6YME5;A0A8I7B6R2;F2DNP6;F2DP42;F2DUJ6;F2DVS7;F2E7H5
GO:0005253	anion channel activity	3	5	0.035763	0.512144	F2CUF1;F2D043;F2D8E6
GO:0005319	lipid transporter activity	3	5	0.035763	0.512144	F2CWC9;F2DGM5;F2EBY7
GO:0008308	voltage-gated anion channel activity	3	5	0.035763	0.512144	F2CUF1;F2D043;F2D8E6
GO:0019238	cyclohydrolase activity	3	5	0.035763	0.512144	A0A8I6XD03;A0A8I6XQX4;A0A8I6YQU0
GO:0000988	transcription factor activity, protein binding	5	12	0.0366226	0.512144	A0A8I7BEI9;F2DAW4;F2DUE6;F2DXX0;F2EFK9
GO:0000989	transcription factor activity, transcription factor binding	5	12	0.0366226	0.512144	A0A8I7BEI9;F2DAW4;F2DUE6;F2DXX0;F2EFK9
GO:0003712	transcription cofactor activity	5	12	0.0366226	0.512144	A0A8I7BEI9;F2DAW4;F2DUE6;F2DXX0;F2EFK9
GO:0016667	oxidoreductase activity, acting on a sulfur group of donors	10	33	0.0379684	0.512144	A0A8I6WEH2;A0A8I6XK58;A0A8I6Y4Z6;F2CQX6;F2CVB4;F2CW22;F2CXT5;F2CZC9;F2D9U3;Q7XZK3
GO:0032182	ubiquitin-like protein binding	13	47	0.0399564	0.512144	A0A287NWK0;A0A8I6WKG3;A0A8I6XEP7;A0A8I6XJN9;A0A8I6Y0T7;A0A8I6Y2P0;A0A8I6YME5;A0A8I7B6R2;F2DNP6;F2DP42;F2DUJ6;F2DVS7;F2E7H5
GO:0016614	oxidoreductase activity, acting on CH-OH group of donors	23	96	0.0411785	0.512144	A0A287GYL8;A0A3S9KBF3;A0A8I6W9A2;A0A8I6X6J9;A0A8I6XHC6;A0A8I6XRG5;A0A8I6XUQ8;A0A8I6YGW7;A0A8I7B4C5;F2CPM4;F2CPN8;F2CQV7;F2CR82;F2CSK4;F2CWF3;F2D005;F2D1C6;F2D700;F2DHZ5;F2DS63;F2DSA8;F2E7V8;F2ELT5
GO:0016627	oxidoreductase activity, acting on the CH-CH group of donors	9	29	0.0414682	0.512144	A0A8I6WKM0;A0A8I6WTI3;A0A8I6X7P5;A0A8I6XCQ2;A0A8I6YFL0;A0A8I7BJR0;F2D1W8;F2EL27;M0YR50
GO:0030234	enzyme regulator activity	29	127	0.0428883	0.512144	A0A287DTW3;A0A287FZ34;A0A8I6WHB0;A0A8I6WTQ8;A0A8I6XWQ1;A0A8I6Y9X5;A0A8I6YIV5;A0A8I7B659;A8V3Q1;A8V3Y1;F2CUF5;F2CVE0;F2D8Y6;F2DAR0;F2DIG1;F2DML2;F2DSZ9;F2DZF2;F2E2B0;F2E3X1;F2E4D2;F2E5X4;F2E8J4;F2ELP4;M0V3S6;M0WNW4;M0XBS5;Q7XZK3;Q9M4C9
GO:0030527	structural constituent of chromatin	10	35	0.0552259	0.512144	A0A8I6WDV9;A0A8I6WKT1;A0A8I6WV37;A0A8I6X313;A0A8I6X7G0;A0A8I6X8T5;A0A8I6Y8S1;A0A8I6YL06;F2CUP3;F2EJV3
GO:0005198	structural molecule activity	38	178	0.0580778	0.512144	A0A8I6WDV9;A0A8I6WKT1;A0A8I6WV37;A0A8I6X313;A0A8I6X7G0;A0A8I6X8T5;A0A8I6XZV6;A0A8I6Y8S1;A0A8I6YL06;A0A8I6Z7P9;F2CRW7;F2CS15;F2CS23;F2CSX2;F2CT73;F2CUP3;F2CVM4;F2CZ65;F2D1K5;F2D293;F2D2Y2;F2D483;F2D4K2;F2D558;F2D702;F2DAK3;F2DBW7;F2DFA6;F2DHN5;F2DIR3;F2E0C0;F2E556;F2ECK7;F2EFR1;F2EG94;F2EIG1;F2EJV3;Q9XHS0
GO:0016491	oxidoreductase activity	78	398	0.0594098	0.512144	A0A287GYL8;A0A3S9KBF3;A0A8I6W9A2;A0A8I6WEH2;A0A8I6WGG3;A0A8I6WHE5;A0A8I6WKM0;A0A8I6WPS5;A0A8I6WRJ2;A0A8I6WTI3;A0A8I6WZA5;A0A8I6X6J9;A0A8I6X7P5;A0A8I6XCQ2;A0A8I6XDR0;A0A8I6XHC6;A0A8I6XJ20;A0A8I6XK58;A0A8I6XLS0;A0A8I6XQX4;A0A8I6XRG5;A0A8I6XTB9;A0A8I6XU09;A0A8I6XUK6;A0A8I6XUQ8;A0A8I6XYN6;A0A8I6Y4Z6;A0A8I6YFL0;A0A8I6YGW7;A0A8I6YHJ3;A0A8I6YWJ4;A0A8I6YXG5;A0A8I6Z0L1;A0A8I7B4C5;A0A8I7B935;A0A8I7BAB0;A0A…
GO:0008324	cation transmembrane transporter activity	12	45	0.0609802	0.512144	A0A8I6WDR3;A0A8I6X6Y8;A0A8I6XE20;A0A8I6XQR9;A0A8I7B5T8;F2CRK6;F2CWF3;F2CWQ6;F2DJJ2;F2DXG7;F2EF80;Q4A1H2
GO:0019829	cation-transporting ATPase activity	9	31	0.0614247	0.512144	A0A8I6WDR3;A0A8I6X6Y8;A0A8I6XE20;A0A8I6XQR9;A0A8I7B5T8;F2CRK6;F2CWQ6;F2DJJ2;F2EF80
GO:0042625	ATPase coupled ion transmembrane transporter activity	9	31	0.0614247	0.512144	A0A8I6WDR3;A0A8I6X6Y8;A0A8I6XE20;A0A8I6XQR9;A0A8I7B5T8;F2CRK6;F2CWQ6;F2DJJ2;F2EF80
GO:0000036	ACP phosphopantetheine attachment site binding involved in fatty acid biosynthetic process	3	6	0.0627623	0.512144	A0A8I6XNX9;F2D2W5;F2DMT1
GO:0008080	N-acetyltransferase activity	3	6	0.0627623	0.512144	A0A8I6X472;F2CW53;M0WAP6
GO:0019887	protein kinase regulator activity	3	6	0.0627623	0.512144	A0A8I6YIV5;F2DML2;F2E3X1
GO:0044620	ACP phosphopantetheine attachment site binding	3	6	0.0627623	0.512144	A0A8I6XNX9;F2D2W5;F2DMT1
GO:0051192	prosthetic group binding	3	6	0.0627623	0.512144	A0A8I6XNX9;F2D2W5;F2DMT1
GO:0004871	signal transducer activity	6	18	0.0657788	0.512144	A0A287P008;A0A8I6WXW1;A0A8I6XCP7;A0A8I6XIK9;F2DAR0;F2DS97
GO:0070403	NAD+ binding	4	10	0.070296	0.512144	A0A8I6XUQ8;A0A8I6YFL0;A0A8I7BJR0;F2D1C6
GO:0016616	oxidoreductase activity, acting on the CH-OH group of donors, NAD or NADP as acceptor	21	91	0.0703378	0.512144	A0A287GYL8;A0A3S9KBF3;A0A8I6W9A2;A0A8I6X6J9;A0A8I6XHC6;A0A8I6XRG5;A0A8I6XUQ8;A0A8I6YGW7;A0A8I7B4C5;F2CPM4;F2CPN8;F2CR82;F2CWF3;F2D005;F2D1C6;F2D700;F2DHZ5;F2DS63;F2DSA8;F2E7V8;F2ELT5
GO:0015075	ion transmembrane transporter activity	17	71	0.0730232	0.512144	A0A8I6WDR3;A0A8I6X6Y8;A0A8I6XE20;A0A8I6XQR9;A0A8I6Y690;A0A8I7B5T8;F2CRK6;F2CUF1;F2CWF3;F2CWQ6;F2D043;F2D8E6;F2DG80;F2DJJ2;F2DXG7;F2EF80;Q4A1H2
GO:0001671	ATPase activator activity	2	3	0.0745581	0.512144	F2DIG1;F2E4D2
GO:0004457	lactate dehydrogenase activity	2	3	0.0745581	0.512144	F2DHZ5;F2DSA8
GO:0004714	transmembrane receptor protein tyrosine kinase activity	2	3	0.0745581	0.512144	A0A287P008;A0A8I6XIK9
GO:0004888	transmembrane signaling receptor activity	2	3	0.0745581	0.512144	A0A287P008;A0A8I6XIK9
GO:0005261	cation channel activity	2	3	0.0745581	0.512144	F2CWF3;F2DXG7
GO:0016899	oxidoreductase activity, acting on the CH-OH group of donors, oxygen as acceptor	2	3	0.0745581	0.512144	F2CQV7;F2DHZ5
GO:0019199	transmembrane receptor protein kinase activity	2	3	0.0745581	0.512144	A0A287P008;A0A8I6XIK9
GO:0033743	peptide-methionine (R)-S-oxide reductase activity	2	3	0.0745581	0.512144	A0A8I6Y4Z6;F2CZC9
GO:0099600	transmembrane receptor activity	2	3	0.0745581	0.512144	A0A287P008;A0A8I6XIK9
GO:0044769	ATPase activity, coupled to transmembrane movement of ions, rotational mechanism	7	23	0.0754955	0.512144	A0A8I6WDR3;A0A8I6X6Y8;A0A8I6XE20;A0A8I7B5T8;F2CRK6;F2CWQ6;F2DJJ2
GO:0051087	chaperone binding	7	23	0.0754955	0.512144	A0A8I6WMP9;A0A8I6WR25;A0A8I6XBL4;A0A8I7B659;F2CTS4;F2DB07;F2E4D2
GO:0015399	primary active transmembrane transporter activity	10	37	0.0769776	0.512144	A0A8I6WDR3;A0A8I6X6Y8;A0A8I6XE20;A0A8I6XNJ0;A0A8I6XQR9;A0A8I7B5T8;F2CRK6;F2CWQ6;F2DJJ2;F2EF80
GO:0015405	P-P-bond-hydrolysis-driven transmembrane transporter activity	10	37	0.0769776	0.512144	A0A8I6WDR3;A0A8I6X6Y8;A0A8I6XE20;A0A8I6XNJ0;A0A8I6XQR9;A0A8I7B5T8;F2CRK6;F2CWQ6;F2DJJ2;F2EF80
GO:0004672	protein kinase activity	12	47	0.0810351	0.512144	A0A287EZV5;A0A287FP91;A0A287P008;A0A8I6X017;A0A8I6XCP7;A0A8I6XIK9;A0A8I6Z0S4;F2D480;F2DML2;F2DS97;F2EFS9;M0XGU8
GO:0003682	chromatin binding	6	19	0.0831119	0.512144	A0A287EZS0;A0A287U5M5;A0A8I6WV37;A0A8I6YL06;A0A8I6YZG5;F2EHE1
GO:0060589	nucleoside-triphosphatase regulator activity	9	33	0.0866339	0.512144	A0A287FZ34;A0A8I6WTQ8;A0A8I6XWQ1;A0A8I6Y9X5;A0A8I7B659;F2D8Y6;F2DIG1;F2E4D2;M0WNW4
GO:0003676	nucleic acid binding	101	537	0.0876755	0.512144	A0A287EZS0;A0A287JEP8;A0A8I6WC09;A0A8I6WDS1;A0A8I6WDV9;A0A8I6WFJ6;A0A8I6WKT1;A0A8I6WL52;A0A8I6WV37;A0A8I6X1I1;A0A8I6X313;A0A8I6X472;A0A8I6X660;A0A8I6X7G0;A0A8I6X8T5;A0A8I6XD40;A0A8I6XDB4;A0A8I6XEF6;A0A8I6XEW3;A0A8I6XF02;A0A8I6XG35;A0A8I6XKP9;A0A8I6XLR3;A0A8I6XQQ9;A0A8I6XSQ9;A0A8I6XUG0;A0A8I6XWQ1;A0A8I6Y2R8;A0A8I6Y6M4;A0A8I6Y871;A0A8I6Y8S1;A0A8I6YBH6;A0A8I6YF06;A0A8I6YF47;A0A8I6YL06;A0A8I6YLT8;A0A…
GO:0016628	oxidoreductase activity, acting on the CH-CH group of donors, NAD or NADP as acceptor	4	11	0.0963624	0.512144	A0A8I6YFL0;A0A8I7BJR0;F2D1W8;M0YR50
GO:0031491	nucleosome binding	4	11	0.0963624	0.512144	A0A287EZS0;A0A8I6WV37;A0A8I6YL06;F2EHE1
GO:0038023	signaling receptor activity	4	11	0.0963624	0.512144	A0A287P008;A0A8I6XCP7;A0A8I6XIK9;F2DAR0
GO:0060590	ATPase regulator activity	4	11	0.0963624	0.512144	A0A8I6Y9X5;A0A8I7B659;F2DIG1;F2E4D2
GO:0019201	nucleotide kinase activity	3	7	0.0965114	0.512144	A0A8I6WHD1;F2E8P3;F2EIL0
GO:0015926	glucosidase activity	6	20	0.102722	0.512144	A0A8I6WD99;A0A8I6WH69;A0A8I6WVW5;A0A8I6XH57;A0A8I6YIR4;Q42835
GO:0030246	carbohydrate binding	10	39	0.103391	0.512144	A0A287ILG2;A0A8I6W6F0;A0A8I6WRJ2;A0A8I6XH57;A0A8I6XUU4;A0A8I6YIR4;A0A8I6YK25;F2CSE2;F2CW03;F2E3X1
GO:0051287	NAD binding	11	44	0.104488	0.512144	A0A287GYL8;A0A8I6W9A2;A0A8I6XUQ8;A0A8I6YFL0;A0A8I7B4C5;A0A8I7BAB0;A0A8I7BJR0;F2CPN8;F2CU23;F2D1C6;F2ELT5
GO:0019899	enzyme binding	12	49	0.104814	0.512144	A0A287JEP8;A0A8I6WXW1;A0A8I6XBH2;A0A8I6Y5Z0;A0A8I6YNI8;F2CT56;F2CTS1;F2CW55;F2DLD7;F2E3X1;F2E6T9;F2EJZ7
GO:0015077	monovalent inorganic cation transmembrane transporter activity	9	35	0.117172	0.512144	A0A8I6WDR3;A0A8I6X6Y8;A0A8I6XE20;A0A8I6XQR9;A0A8I7B5T8;F2CRK6;F2CWF3;F2CWQ6;F2DJJ2
GO:0004872	receptor activity	4	12	0.126232	0.512144	A0A287P008;A0A8I6XCP7;A0A8I6XIK9;F2DAR0
GO:0046933	proton-transporting ATP synthase activity, rotational mechanism	4	12	0.126232	0.512144	A0A8I6XE20;A0A8I7B5T8;F2CWQ6;F2DJJ2
GO:0060089	molecular transducer activity	4	12	0.126232	0.512144	A0A287P008;A0A8I6XCP7;A0A8I6XIK9;F2DAR0
GO:0004300	enoyl-CoA hydratase activity	2	4	0.132791	0.512144	A0A8I6XRG5;F2D1C6
GO:0004356	glutamate-ammonia ligase activity	2	4	0.132791	0.512144	A0A8I6Y4J8;F2E3I7
GO:0004656	procollagen-proline 4-dioxygenase activity	2	4	0.132791	0.512144	A0A8I6WRJ2;F2CSE2
GO:0005092	GDP-dissociation inhibitor activity	2	4	0.132791	0.512144	A0A287FZ34;A0A8I6XWQ1
GO:0016211	ammonia ligase activity	2	4	0.132791	0.512144	A0A8I6Y4J8;F2E3I7
GO:0016843	amine-lyase activity	2	4	0.132791	0.512144	A0A287SCX5;F2CWG0
GO:0016880	acid-ammonia (or amide) ligase activity	2	4	0.132791	0.512144	A0A8I6Y4J8;F2E3I7
GO:0019209	kinase activator activity	2	4	0.132791	0.512144	A0A8I6YIV5;F2DML2
GO:0019798	procollagen-proline dioxygenase activity	2	4	0.132791	0.512144	A0A8I6WRJ2;F2CSE2
GO:0030295	protein kinase activator activity	2	4	0.132791	0.512144	A0A8I6YIV5;F2DML2
GO:0030599	pectinesterase activity	2	4	0.132791	0.512144	A0A8I6WS80;F2ELP4
GO:0031418	L-ascorbic acid binding	2	4	0.132791	0.512144	A0A8I6WRJ2;F2CSE2
GO:0031543	peptidyl-proline dioxygenase activity	2	4	0.132791	0.512144	A0A8I6WRJ2;F2CSE2
GO:0031545	peptidyl-proline 4-dioxygenase activity	2	4	0.132791	0.512144	A0A8I6WRJ2;F2CSE2
GO:0045330	aspartyl esterase activity	2	4	0.132791	0.512144	A0A8I6WS80;F2ELP4
GO:0047429	nucleoside-triphosphate diphosphatase activity	2	4	0.132791	0.512144	A0A8I7BBH0;F2D7Z3
GO:0052691	UDP-arabinopyranose mutase activity	2	4	0.132791	0.512144	A0A0U2GJJ3;A0A0U2GJL1
GO:0090599	alpha-glucosidase activity	2	4	0.132791	0.512144	A0A8I6XH57;A0A8I6YIR4
GO:0015035	protein disulfide oxidoreductase activity	3	8	0.135883	0.512144	A0A8I6XK58;F2CXT5;Q7XZK3
GO:0016410	N-acyltransferase activity	3	8	0.135883	0.512144	A0A8I6X472;F2CW53;M0WAP6
GO:0031492	nucleosomal DNA binding	3	8	0.135883	0.512144	A0A8I6WV37;A0A8I6YL06;F2EHE1
GO:0004857	enzyme inhibitor activity	15	67	0.139047	0.512144	A0A287DTW3;A0A8I6WHB0;A0A8I6Y9X5;A8V3Q1;A8V3Y1;F2CUF5;F2DAR0;F2DZF2;F2E5X4;F2E8J4;F2ELP4;M0V3S6;M0XBS5;Q7XZK3;Q9M4C9
GO:0003746	translation elongation factor activity	5	17	0.140889	0.512144	A0A8I6XEF6;A0A8I6XUG0;F2DAU4;F2DXB7;P34824
GO:0016407	acetyltransferase activity	4	13	0.159421	0.512144	A0A8I6X472;F2CW53;F2ECG8;M0WAP6
GO:0000155	phosphorelay sensor kinase activity	1	1	0.167363	0.512144	A0A8I6XCP7
GO:0000246	delta24(24-1) sterol reductase activity	1	1	0.167363	0.512144	F2D1W8
GO:0000979	RNA polymerase II core promoter sequence-specific DNA binding	1	1	0.167363	0.512144	F2ECG8
GO:0000993	RNA polymerase II core binding	1	1	0.167363	0.512144	F2EJZ7
GO:0001046	core promoter sequence-specific DNA binding	1	1	0.167363	0.512144	F2ECG8
GO:0001047	core promoter binding	1	1	0.167363	0.512144	F2ECG8
GO:0002020	protease binding	1	1	0.167363	0.512144	A0A8I6Y5Z0
GO:0003777	microtubule motor activity	1	1	0.167363	0.512144	A0A8I6YCQ1
GO:0003841	1-acylglycerol-3-phosphate O-acyltransferase activity	1	1	0.167363	0.512144	F2CPX3
GO:0003862	3-isopropylmalate dehydrogenase activity	1	1	0.167363	0.512144	A0A8I7B4C5
GO:0003879	ATP phosphoribosyltransferase activity	1	1	0.167363	0.512144	A0A8I6XFM9
GO:0003933	GTP cyclohydrolase activity	1	1	0.167363	0.512144	A0A8I6YQU0
GO:0003935	GTP cyclohydrolase II activity	1	1	0.167363	0.512144	A0A8I6YQU0
GO:0003937	IMP cyclohydrolase activity	1	1	0.167363	0.512144	A0A8I6XD03
GO:0003989	acetyl-CoA carboxylase activity	1	1	0.167363	0.512144	A0A5C1YV39
GO:0003998	acylphosphatase activity	1	1	0.167363	0.512144	F2E0R2
GO:0004047	aminomethyltransferase activity	1	1	0.167363	0.512144	F2DZ70
GO:0004143	diacylglycerol kinase activity	1	1	0.167363	0.512144	F2DZN2
GO:0004152	dihydroorotate dehydrogenase activity	1	1	0.167363	0.512144	A0A8I6WKM0
GO:0004338	glucan exo-1,3-beta-glucosidase activity	1	1	0.167363	0.512144	Q42835
GO:0004358	glutamate N-acetyltransferase activity	1	1	0.167363	0.512144	F2CW53
GO:0004392	heme oxygenase (decyclizing) activity	1	1	0.167363	0.512144	F2DC91
GO:0004413	homoserine kinase activity	1	1	0.167363	0.512144	F2E2C7
GO:0004416	hydroxyacylglutathione hydrolase activity	1	1	0.167363	0.512144	A0A8I6XQ26
GO:0004451	isocitrate lyase activity	1	1	0.167363	0.512144	A0A8I6XFM0
GO:0004458	D-lactate dehydrogenase (cytochrome) activity	1	1	0.167363	0.512144	F2DSA8
GO:0004489	methylenetetrahydrofolate reductase (NAD(P)H) activity	1	1	0.167363	0.512144	A0A8I6YWJ4
GO:0004592	pantoate-beta-alanine ligase activity	1	1	0.167363	0.512144	F2DR63
GO:0004612	phosphoenolpyruvate carboxykinase (ATP) activity	1	1	0.167363	0.512144	F2DEG9
GO:0004643	phosphoribosylaminoimidazolecarboxamide formyltransferase activity	1	1	0.167363	0.512144	A0A8I6XD03
GO:0004664	prephenate dehydratase activity	1	1	0.167363	0.512144	A0A8I6YHI9
GO:0004673	protein histidine kinase activity	1	1	0.167363	0.512144	A0A8I6XCP7
GO:0004749	ribose phosphate diphosphokinase activity	1	1	0.167363	0.512144	F2D119
GO:0004777	succinate-semialdehyde dehydrogenase (NAD+) activity	1	1	0.167363	0.512144	A0A8I6Z0L1
GO:0004798	thymidylate kinase activity	1	1	0.167363	0.512144	A0A8I6WHD1
GO:0004814	arginine-tRNA ligase activity	1	1	0.167363	0.512144	A0A8I6WQV8
GO:0004817	cysteine-tRNA ligase activity	1	1	0.167363	0.512144	F2E5S3
GO:0004821	histidine-tRNA ligase activity	1	1	0.167363	0.512144	F2EFV3
GO:0005249	voltage-gated potassium channel activity	1	1	0.167363	0.512144	F2CWF3
GO:0005267	potassium channel activity	1	1	0.167363	0.512144	F2CWF3
GO:0005338	nucleotide-sugar transmembrane transporter activity	1	1	0.167363	0.512144	F2DG80
GO:0005459	UDP-galactose transmembrane transporter activity	1	1	0.167363	0.512144	F2DG80
GO:0005460	UDP-glucose transmembrane transporter activity	1	1	0.167363	0.512144	F2DG80
GO:0008327	methyl-CpG binding	1	1	0.167363	0.512144	M0Y7Q2
GO:0008482	sulfite oxidase activity	1	1	0.167363	0.512144	F2CVB4
GO:0008506	sucrose:proton symporter activity	1	1	0.167363	0.512144	Q4A1H2
GO:0008515	sucrose transmembrane transporter activity	1	1	0.167363	0.512144	Q4A1H2
GO:0008686	3,4-dihydroxy-2-butanone-4-phosphate synthase activity	1	1	0.167363	0.512144	A0A8I6YQU0
GO:0008690	3-deoxy-manno-octulosonate cytidylyltransferase activity	1	1	0.167363	0.512144	F2E9X9
GO:0008692	3-hydroxybutyryl-CoA epimerase activity	1	1	0.167363	0.512144	F2D1C6
GO:0008696	4-amino-4-deoxychorismate lyase activity	1	1	0.167363	0.512144	F2DYM4
GO:0008720	D-lactate dehydrogenase activity	1	1	0.167363	0.512144	F2DSA8
GO:0008837	diaminopimelate epimerase activity	1	1	0.167363	0.512144	A0A8I6XPB3
GO:0008887	glycerate kinase activity	1	1	0.167363	0.512144	F2CVA4
GO:0009881	photoreceptor activity	1	1	0.167363	0.512144	A0A8I6XCP7
GO:0009982	pseudouridine synthase activity	1	1	0.167363	0.512144	F2DDD5
GO:0010242	oxygen evolving activity	1	1	0.167363	0.512144	F2CRK1
GO:0010285	L,L-diaminopimelate aminotransferase activity	1	1	0.167363	0.512144	F2D643
GO:0010307	acetylglutamate kinase regulator activity	1	1	0.167363	0.512144	F2DSZ9
GO:0015154	disaccharide transmembrane transporter activity	1	1	0.167363	0.512144	Q4A1H2
GO:0015157	oligosaccharide transmembrane transporter activity	1	1	0.167363	0.512144	Q4A1H2
GO:0015165	pyrimidine nucleotide-sugar transmembrane transporter activity	1	1	0.167363	0.512144	F2DG80
GO:0015197	peptide transporter activity	1	1	0.167363	0.512144	A0A8I6XNJ0
GO:0015198	oligopeptide transporter activity	1	1	0.167363	0.512144	A0A8I6XNJ0
GO:0015421	oligopeptide-transporting ATPase activity	1	1	0.167363	0.512144	A0A8I6XNJ0
GO:0015440	peptide-transporting ATPase activity	1	1	0.167363	0.512144	A0A8I6XNJ0
GO:0015459	potassium channel regulator activity	1	1	0.167363	0.512144	F2CWF3
GO:0016212	kynurenine-oxoglutarate transaminase activity	1	1	0.167363	0.512144	F2E7W3
GO:0016297	acyl-[acyl-carrier-protein] hydrolase activity	1	1	0.167363	0.512144	F2DMT1
GO:0016411	acylglycerol O-acyltransferase activity	1	1	0.167363	0.512144	F2CPX3
GO:0016775	phosphotransferase activity, nitrogenous group as acceptor	1	1	0.167363	0.512144	A0A8I6XCP7
GO:0016778	diphosphotransferase activity	1	1	0.167363	0.512144	F2D119
GO:0016855	racemase and epimerase activity, acting on amino acids and derivatives	1	1	0.167363	0.512144	A0A8I6XPB3
GO:0016856	racemase and epimerase activity, acting on hydroxy acids and derivatives	1	1	0.167363	0.512144	F2D1C6
GO:0016898	oxidoreductase activity, acting on the CH-OH group of donors, cytochrome as acceptor	1	1	0.167363	0.512144	F2DSA8
GO:0017025	TBP-class protein binding	1	1	0.167363	0.512144	F2ECG8
GO:0017077	oxidative phosphorylation uncoupler activity	1	1	0.167363	0.512144	A0A8I6Y690
GO:0017080	sodium channel regulator activity	1	1	0.167363	0.512144	A0A8I6XBH2
GO:0018658	salicylate 1-monooxygenase activity	1	1	0.167363	0.512144	W8E7E3
GO:0019144	ADP-sugar diphosphatase activity	1	1	0.167363	0.512144	F2DSU7
GO:0019158	mannokinase activity	1	1	0.167363	0.512144	F2CW03
GO:0033201	alpha-1,4-glucan synthase activity	1	1	0.167363	0.512144	C3W8L3
GO:0034353	RNA pyrophosphohydrolase activity	1	1	0.167363	0.512144	A0A8I6YF06
GO:0035673	oligopeptide transmembrane transporter activity	1	1	0.167363	0.512144	A0A8I6XNJ0
GO:0036137	kynurenine aminotransferase activity	1	1	0.167363	0.512144	F2E7W3
GO:0036361	racemase activity, acting on amino acids and derivatives	1	1	0.167363	0.512144	A0A8I6XPB3
GO:0042030	ATPase inhibitor activity	1	1	0.167363	0.512144	A0A8I6Y9X5
GO:0042171	lysophosphatidic acid acyltransferase activity	1	1	0.167363	0.512144	F2CPX3
GO:0042577	lipid phosphatase activity	1	1	0.167363	0.512144	A0A8I6YMC3
GO:0042887	amide transmembrane transporter activity	1	1	0.167363	0.512144	A0A8I6XNJ0
GO:0043175	RNA polymerase core enzyme binding	1	1	0.167363	0.512144	F2EJZ7
GO:0044594	17-beta-hydroxysteroid dehydrogenase (NAD+) activity	1	1	0.167363	0.512144	A0A8I6XRG5
GO:0045544	gibberellin 20-oxidase activity	1	1	0.167363	0.512144	Q673G6
GO:0047522	15-oxoprostaglandin 13-oxidase activity	1	1	0.167363	0.512144	M0YR50
GO:0047641	aldose-6-phosphate reductase (NADPH) activity	1	1	0.167363	0.512144	A0A8I6YGW7
GO:0047661	amino-acid racemase activity	1	1	0.167363	0.512144	A0A8I6XPB3
GO:0047769	arogenate dehydratase activity	1	1	0.167363	0.512144	A0A8I6YHI9
GO:0048030	disaccharide binding	1	1	0.167363	0.512144	F2E3X1
GO:0050614	delta24-sterol reductase activity	1	1	0.167363	0.512144	F2D1W8
GO:0051392	tRNA N-acetyltransferase activity	1	1	0.167363	0.512144	A0A8I6X472
GO:0052615	ent-kaurene oxidase activity	1	1	0.167363	0.512144	F2DZK7
GO:0061657	UFM1 conjugating enzyme activity	1	1	0.167363	0.512144	F2E3I5
GO:0070034	telomerase RNA binding	1	1	0.167363	0.512144	F2CQY5
GO:0070492	oligosaccharide binding	1	1	0.167363	0.512144	F2E3X1
GO:0071566	UFM1 activating enzyme activity	1	1	0.167363	0.512144	A0A8I6YHZ7
GO:0080030	methyl indole-3-acetate esterase activity	1	1	0.167363	0.512144	A0A8I6WT14
GO:0080031	methyl salicylate esterase activity	1	1	0.167363	0.512144	A0A8I6WT14
GO:0080032	methyl jasmonate esterase activity	1	1	0.167363	0.512144	A0A8I6WT14
GO:0080041	ADP-ribose pyrophosphohydrolase activity	1	1	0.167363	0.512144	F2DSU7
GO:0080042	ADP-glucose pyrophosphohydrolase activity	1	1	0.167363	0.512144	F2DSU7
GO:1901982	maltose binding	1	1	0.167363	0.512144	F2E3X1
GO:1904680	peptide transmembrane transporter activity	1	1	0.167363	0.512144	A0A8I6XNJ0
GO:1990189	peptide-serine-N-acetyltransferase activity	1	1	0.167363	0.512144	M0WAP6
GO:1990190	peptide-glutamate-N-acetyltransferase activity	1	1	0.167363	0.512144	M0WAP6
GO:1990381	ubiquitin-specific protease binding	1	1	0.167363	0.512144	A0A8I6Y5Z0
GO:1990883	rRNA cytidine N-acetyltransferase activity	1	1	0.167363	0.512144	A0A8I6X472
GO:0036442	hydrogen-exporting ATPase activity	5	18	0.169777	0.517313	A0A8I6WDR3;A0A8I6X6Y8;A0A8I6XQR9;F2CRK6;F2DJJ2
GO:0015267	channel activity	6	23	0.174076	0.522407	A0A8I6WG88;F2CUF1;F2CWF3;F2D043;F2D8E6;F2DXG7
GO:0022803	passive transmembrane transporter activity	6	23	0.174076	0.522407	A0A8I6WG88;F2CUF1;F2CWF3;F2D043;F2D8E6;F2DXG7
GO:0022838	substrate-specific channel activity	6	23	0.174076	0.522407	A0A8I6WG88;F2CUF1;F2CWF3;F2D043;F2D8E6;F2DXG7
GO:0004674	protein serine/threonine kinase activity	8	33	0.17438	0.522407	A0A287EZV5;A0A287FP91;A0A8I6X017;A0A8I6Z0S4;F2D480;F2DS97;F2EFS9;M0XGU8
GO:0004864	protein phosphatase inhibitor activity	3	9	0.179622	0.531414	F2DAR0;F2DZF2;M0V3S6
GO:0016814	hydrolase activity, acting on carbon-nitrogen (but not peptide) bonds, in cyclic amidines	3	9	0.179622	0.531414	A0A8I6XD03;A0A8I6XQX4;A0A8I6YQU0
GO:0019212	phosphatase inhibitor activity	3	9	0.179622	0.531414	F2DAR0;F2DZF2;M0V3S6
GO:0015078	hydrogen ion transmembrane transporter activity	8	34	0.196884	0.570045	A0A8I6WDR3;A0A8I6X6Y8;A0A8I6XE20;A0A8I6XQR9;A0A8I7B5T8;F2CRK6;F2CWQ6;F2DJJ2
GO:0004024	alcohol dehydrogenase activity, zinc-dependent	2	5	0.197477	0.570045	A0A8I6X6J9;F2D005
GO:0004650	polygalacturonase activity	2	5	0.197477	0.570045	A0A8I6WXY7;A0A8I6XPG4
GO:0004713	protein tyrosine kinase activity	2	5	0.197477	0.570045	A0A287P008;A0A8I6XIK9
GO:0016635	oxidoreductase activity, acting on the CH-CH group of donors, quinone or related compound as acceptor	2	5	0.197477	0.570045	A0A8I6WKM0;F2EL27
GO:0051903	S-(hydroxymethyl)glutathione dehydrogenase activity	2	5	0.197477	0.570045	A0A8I6X6J9;F2D005
GO:0008270	zinc ion binding	17	83	0.214475	0.615414	A0A8I6WDS1;A0A8I6WMI1;A0A8I6X6J9;A0A8I6XF02;A0A8I6XGX1;A0A8I6XSD2;A0A8I6YS17;A0A8I7BJR0;F2CPM4;F2D005;F2DD34;F2DJM5;F2E3M7;F2E7V8;F2EJZ7;F2ELJ9;M0Y7Q2
GO:0022890	inorganic cation transmembrane transporter activity	9	40	0.21492	0.615414	A0A8I6WDR3;A0A8I6X6Y8;A0A8I6XE20;A0A8I6XQR9;A0A8I7B5T8;F2CRK6;F2CWF3;F2CWQ6;F2DJJ2
GO:0022804	active transmembrane transporter activity	12	56	0.216132	0.616408	A0A8I6WDR3;A0A8I6X6Y8;A0A8I6XE20;A0A8I6XNJ0;A0A8I6XQR9;A0A8I7B5T8;F2CRK6;F2CWQ6;F2DG80;F2DJJ2;F2EF80;Q4A1H2
GO:0008641	small protein activating enzyme activity	3	10	0.226477	0.635715	A0A8I6YHZ7;A0A8I7BF02;F2DHP2
GO:0031490	chromatin DNA binding	3	10	0.226477	0.635715	A0A8I6WV37;A0A8I6YL06;F2EHE1
GO:0043566	structure-specific DNA binding	3	10	0.226477	0.635715	A0A8I6WV37;A0A8I6YL06;F2EHE1
GO:0051879	Hsp90 protein binding	3	10	0.226477	0.635715	A0A8I6XBL4;A0A8I6YKD5;A0A8I7B3J5
GO:0008135	translation factor activity, RNA binding	13	62	0.227359	0.635715	A0A8I6WC09;A0A8I6XEF6;A0A8I6XUG0;A0A8I6XWQ1;A0A8I6Y2R8;F2CZL7;F2D788;F2DAU4;F2DRT8;F2DXB7;F2DXD4;M0YRX3;P34824
GO:0003690	double-stranded DNA binding	5	20	0.233399	0.645289	A0A8I6WV37;A0A8I6XLR3;A0A8I6YL06;F2ECG8;F2EHE1
GO:0008422	beta-glucosidase activity	4	15	0.233499	0.645289	A0A8I6WD99;A0A8I6WH69;A0A8I6WVW5;Q42835
GO:0046961	proton-transporting ATPase activity, rotational mechanism	4	15	0.233499	0.645289	A0A8I6WDR3;A0A8I6X6Y8;F2CRK6;F2DJJ2
GO:0032403	protein complex binding	10	47	0.251937	0.654857	A0A287EZS0;A0A8I6WV37;A0A8I6X6U8;A0A8I6YCQ1;A0A8I6YKQ7;A0A8I6YKV1;A0A8I6YL06;F2DUJ6;F2EHE1;F2EJZ7
GO:0008047	enzyme activator activity	7	31	0.25275	0.654857	A0A8I6WTQ8;A0A8I6YIV5;F2D8Y6;F2DIG1;F2DML2;F2E4D2;M0WNW4
GO:0042623	ATPase activity, coupled	12	58	0.254797	0.654857	A0A8I6WDR3;A0A8I6X6Y8;A0A8I6XE20;A0A8I6XNJ0;A0A8I6XQR9;A0A8I7B5T8;F2CRK6;F2CWQ6;F2DC74;F2DJJ2;F2E6T9;F2EF80
GO:0004017	adenylate kinase activity	2	6	0.264834	0.654857	F2E8P3;F2EIL0
GO:0004022	alcohol dehydrogenase (NAD) activity	2	6	0.264834	0.654857	A0A8I6X6J9;F2D005
GO:0004032	alditol:NADP+ 1-oxidoreductase activity	2	6	0.264834	0.654857	A0A8I6XHC6;F2D700
GO:0004034	aldose 1-epimerase activity	2	6	0.264834	0.654857	A0A287ILG2;A0A8I6YK25
GO:0016790	thiolester hydrolase activity	2	6	0.264834	0.654857	A0A8I6XQ26;F2DMT1
GO:0019901	protein kinase binding	2	6	0.264834	0.654857	A0A8I6WXW1;F2E3X1
GO:0008483	transaminase activity	5	21	0.267424	0.654857	A0A8I6YQI6;F2D643;F2DZ70;F2E7W3;F2EDT9
GO:0016769	transferase activity, transferring nitrogenous groups	5	21	0.267424	0.654857	A0A8I6YQI6;F2D643;F2DZ70;F2E7W3;F2EDT9
GO:0015036	disulfide oxidoreductase activity	4	16	0.273205	0.654857	A0A8I6XK58;F2CW22;F2CXT5;Q7XZK3
GO:0019208	phosphatase regulator activity	4	16	0.273205	0.654857	F2CVE0;F2DAR0;F2DZF2;M0V3S6
GO:0019888	protein phosphatase regulator activity	4	16	0.273205	0.654857	F2CVE0;F2DAR0;F2DZF2;M0V3S6
GO:0031593	polyubiquitin binding	4	16	0.273205	0.654857	A0A8I6XEP7;A0A8I6Y0T7;A0A8I6Y2P0;F2DUJ6
GO:0004033	aldo-keto reductase (NADP) activity	3	11	0.275269	0.654857	A0A8I6XHC6;F2CWF3;F2D700
GO:0022892	substrate-specific transporter activity	23	121	0.28204	0.654857	A0A8I6WDR3;A0A8I6WG88;A0A8I6WIT4;A0A8I6X6Y8;A0A8I6XE20;A0A8I6XNJ0;A0A8I6XQR9;A0A8I6Y690;A0A8I7B5T8;F2CRK6;F2CUF1;F2CWC9;F2CWF3;F2CWQ6;F2D043;F2D8E6;F2DG80;F2DGM5;F2DJJ2;F2DXG7;F2EBY7;F2EF80;Q4A1H2
GO:0050662	coenzyme binding	24	127	0.286755	0.654857	A0A287GYL8;A0A3S9KBF3;A0A8I6W9A2;A0A8I6WEH2;A0A8I6WGG3;A0A8I6XCQ2;A0A8I6XLS0;A0A8I6XUQ8;A0A8I6YFL0;A0A8I6YWJ4;A0A8I7B4C5;A0A8I7B935;A0A8I7BAB0;A0A8I7BJR0;F2CPN8;F2CQV7;F2CU23;F2CVB4;F2D1C6;F2D1W8;F2DHZ5;F2DSA8;F2EL27;F2ELT5
GO:0005488	binding	316	1854	0.294031	0.654857	A0A287EZS0;A0A287EZV5;A0A287FP91;A0A287GYL8;A0A287ILG2;A0A287JEP8;A0A287NWK0;A0A287P008;A0A287PY01;A0A287Q7U2;A0A287U5M5;A0A287WH27;A0A2P1AB13;A0A3S9KBF3;A0A5C1YV39;A0A8I6W6F0;A0A8I6W9A2;A0A8I6WB19;A0A8I6WB26;A0A8I6WC09;A0A8I6WDS1;A0A8I6WDV9;A0A8I6WEH2;A0A8I6WF91;A0A8I6WFJ6;A0A8I6WGG3;A0A8I6WHD1;A0A8I6WKG3;A0A8I6WKT1;A0A8I6WL52;A0A8I6WMI1;A0A8I6WMP9;A0A8I6WNS5;A0A8I6WQV8;A0A8I6WR25;A0A8I6WRJ2;A0A…
GO:0016818	hydrolase activity, acting on acid anhydrides, in phosphorus-containing anhydrides	42	231	0.29662	0.654857	A0A287Q7U2;A0A8I6WB19;A0A8I6WDR3;A0A8I6X6U8;A0A8I6X6Y8;A0A8I6XE20;A0A8I6XNJ0;A0A8I6XQR9;A0A8I6XUG0;A0A8I6Y2R8;A0A8I6Y6M4;A0A8I6YCQ1;A0A8I6YF06;A0A8I6YKV1;A0A8I6YS17;A0A8I6YT49;A0A8I7B5T8;A0A8I7BBH0;A0A8I7BCY8;F2CRK6;F2CWN4;F2CWQ6;F2D5K0;F2D6M6;F2D7Z3;F2D8X9;F2DAU4;F2DC74;F2DE60;F2DJJ2;F2DPU4;F2DSU7;F2DUR4;F2DXB7;F2E0R2;F2E0U3;F2E4I7;F2E6T9;F2EF80;M0WNW4;M0XN08;P34824
GO:0046982	protein heterodimerization activity	8	38	0.296717	0.654857	A0A8I6WDV9;A0A8I6WKT1;A0A8I6X313;A0A8I6X7G0;A0A8I6X8T5;A0A8I6Y8S1;F2CUP3;F2EJV3
GO:0030695	GTPase regulator activity	5	22	0.302443	0.654857	A0A287FZ34;A0A8I6WTQ8;A0A8I6XWQ1;F2D8Y6;M0WNW4
GO:0001098	basal transcription machinery binding	1	2	0.306763	0.654857	F2EJZ7
GO:0001099	basal RNA polymerase II transcription machinery binding	1	2	0.306763	0.654857	F2EJZ7
GO:0003774	motor activity	1	2	0.306763	0.654857	A0A8I6YCQ1
GO:0003950	NAD+ ADP-ribosyltransferase activity	1	2	0.306763	0.654857	F2ELJ9
GO:0003960	NADPH:quinone reductase activity	1	2	0.306763	0.654857	A0A8I6XLS0
GO:0004042	acetyl-CoA:L-glutamate N-acetyltransferase activity	1	2	0.306763	0.654857	F2CW53
GO:0004061	arylformamidase activity	1	2	0.306763	0.654857	A0A8I6YTX6
GO:0004096	catalase activity	1	2	0.306763	0.654857	F2CPL2
GO:0004097	catechol oxidase activity	1	2	0.306763	0.654857	D7USP2
GO:0004170	dUTP diphosphatase activity	1	2	0.306763	0.654857	A0A8I7BBH0
GO:0004352	glutamate dehydrogenase (NAD+) activity	1	2	0.306763	0.654857	F2E0P9
GO:0004459	L-lactate dehydrogenase activity	1	2	0.306763	0.654857	F2DHZ5
GO:0004477	methenyltetrahydrofolate cyclohydrolase activity	1	2	0.306763	0.654857	A0A8I6XQX4
GO:0004488	methylenetetrahydrofolate dehydrogenase (NADP+) activity	1	2	0.306763	0.654857	A0A8I6XQX4
GO:0004558	alpha-1,4-glucosidase activity	1	2	0.306763	0.654857	A0A8I6YIR4
GO:0004563	beta-N-acetylhexosaminidase activity	1	2	0.306763	0.654857	A0A8I7B5I9
GO:0004579	dolichyl-diphosphooligosaccharide-protein glycotransferase activity	1	2	0.306763	0.654857	A0A8I6XRV2
GO:0004591	oxoglutarate dehydrogenase (succinyl-transferring) activity	1	2	0.306763	0.654857	A0A8I6WGG3
GO:0004596	peptide alpha-N-acetyltransferase activity	1	2	0.306763	0.654857	M0WAP6
GO:0004642	phosphoribosylformylglycinamidine synthase activity	1	2	0.306763	0.654857	A0A8I6X6B1
GO:0004725	protein tyrosine phosphatase activity	1	2	0.306763	0.654857	F2CX03
GO:0004818	glutamate-tRNA ligase activity	1	2	0.306763	0.654857	M0XNG3
GO:0004828	serine-tRNA ligase activity	1	2	0.306763	0.654857	F2E941
GO:0005093	Rab GDP-dissociation inhibitor activity	1	2	0.306763	0.654857	A0A287FZ34
GO:0005351	sugar:proton symporter activity	1	2	0.306763	0.654857	Q4A1H2
GO:0005402	cation:sugar symporter activity	1	2	0.306763	0.654857	Q4A1H2
GO:0008113	peptide-methionine (S)-S-oxide reductase activity	1	2	0.306763	0.654857	F2D9U3
GO:0008134	transcription factor binding	1	2	0.306763	0.654857	F2ECG8
GO:0008840	4-hydroxy-tetrahydrodipicolinate synthase	1	2	0.306763	0.654857	A0A8I6WWJ7
GO:0008889	glycerophosphodiester phosphodiesterase activity	1	2	0.306763	0.654857	M0WQ79
GO:0009927	histidine phosphotransfer kinase activity	1	2	0.306763	0.654857	A0A8I6WXW1
GO:0010178	IAA-amino acid conjugate hydrolase activity	1	2	0.306763	0.654857	A0A8I7BAE7
GO:0010179	IAA-Ala conjugate hydrolase activity	1	2	0.306763	0.654857	A0A8I7BAE7
GO:0015079	potassium ion transmembrane transporter activity	1	2	0.306763	0.654857	F2CWF3
GO:0015245	fatty acid transporter activity	1	2	0.306763	0.654857	F2EBY7
GO:0015293	symporter activity	1	2	0.306763	0.654857	Q4A1H2
GO:0015294	solute:cation symporter activity	1	2	0.306763	0.654857	Q4A1H2
GO:0015295	solute:proton symporter activity	1	2	0.306763	0.654857	Q4A1H2
GO:0015485	cholesterol binding	1	2	0.306763	0.654857	Q38JE4
GO:0015929	hexosaminidase activity	1	2	0.306763	0.654857	A0A8I7B5I9
GO:0016229	steroid dehydrogenase activity	1	2	0.306763	0.654857	A0A8I6XRG5
GO:0019948	SUMO activating enzyme activity	1	2	0.306763	0.654857	A0A8I7BF02
GO:0030151	molybdenum ion binding	1	2	0.306763	0.654857	F2CVB4
GO:0032051	clathrin light chain binding	1	2	0.306763	0.654857	A0A8I6XZV6
GO:0033744	L-methionine:thioredoxin-disulfide S-oxidoreductase activity	1	2	0.306763	0.654857	F2D9U3
GO:0033764	steroid dehydrogenase activity, acting on the CH-OH group of donors, NAD or NADP as acceptor	1	2	0.306763	0.654857	A0A8I6XRG5
GO:0034212	peptide N-acetyltransferase activity	1	2	0.306763	0.654857	M0WAP6
GO:0036456	L-methionine-(S)-S-oxide reductase activity	1	2	0.306763	0.654857	F2D9U3
GO:0043424	protein histidine kinase binding	1	2	0.306763	0.654857	A0A8I6WXW1
GO:0043546	molybdopterin cofactor binding	1	2	0.306763	0.654857	F2CVB4
GO:0070063	RNA polymerase binding	1	2	0.306763	0.654857	F2EJZ7
GO:0071074	eukaryotic initiation factor eIF2 binding	1	2	0.306763	0.654857	A0A8I6XWQ1
GO:0071617	lysophospholipid acyltransferase activity	1	2	0.306763	0.654857	F2CPX3
GO:1990404	protein ADP-ribosylase activity	1	2	0.306763	0.654857	F2ELJ9
GO:0022891	substrate-specific transmembrane transporter activity	19	100	0.307737	0.654975	A0A8I6WDR3;A0A8I6WG88;A0A8I6X6Y8;A0A8I6XE20;A0A8I6XNJ0;A0A8I6XQR9;A0A8I6Y690;A0A8I7B5T8;F2CRK6;F2CUF1;F2CWF3;F2CWQ6;F2D043;F2D8E6;F2DG80;F2DJJ2;F2DXG7;F2EF80;Q4A1H2
GO:0004177	aminopeptidase activity	4	17	0.313917	0.664163	A0A8I6XSD2;A0A8I6Y6N4;A0A8I6YSG5;F2DNP2
GO:0030276	clathrin binding	4	17	0.313917	0.664163	A0A8I6XZV6;A0A8I6YC75;A0A8I6Z7P9;F2DKP3
GO:0016817	hydrolase activity, acting on acid anhydrides	42	233	0.318535	0.667134	A0A287Q7U2;A0A8I6WB19;A0A8I6WDR3;A0A8I6X6U8;A0A8I6X6Y8;A0A8I6XE20;A0A8I6XNJ0;A0A8I6XQR9;A0A8I6XUG0;A0A8I6Y2R8;A0A8I6Y6M4;A0A8I6YCQ1;A0A8I6YF06;A0A8I6YKV1;A0A8I6YS17;A0A8I6YT49;A0A8I7B5T8;A0A8I7BBH0;A0A8I7BCY8;F2CRK6;F2CWN4;F2CWQ6;F2D5K0;F2D6M6;F2D7Z3;F2D8X9;F2DAU4;F2DC74;F2DE60;F2DJJ2;F2DPU4;F2DSU7;F2DUR4;F2DXB7;F2E0R2;F2E0U3;F2E4I7;F2E6T9;F2EF80;M0WNW4;M0XN08;P34824
GO:0009055	electron carrier activity	6	28	0.32296	0.667134	A0A8I6WTI3;A0A8I6X3E8;A0A8I6XLT2;A0A8I6YT94;F2EAZ9;F2EL27
GO:0016705	oxidoreductase activity, acting on paired donors, with incorporation or reduction of molecular oxygen	6	28	0.32296	0.667134	A0A8I6WRJ2;F2CSE2;F2DC91;F2DZK7;Q673G6;W8E7E3
GO:0016810	hydrolase activity, acting on carbon-nitrogen (but not peptide) bonds	8	39	0.323433	0.667134	A0A8I6X899;A0A8I6X926;A0A8I6XA88;A0A8I6XD03;A0A8I6XQX4;A0A8I6YQU0;A0A8I6YTX6;A0A8I7BAE7
GO:0016706	oxidoreductase activity, acting on paired donors, with incorporation or reduction of molecular oxygen, 2-oxoglutarate as one donor, and incorporation of one atom each of oxygen into both donors	3	12	0.324948	0.667134	A0A8I6WRJ2;F2CSE2;Q673G6
GO:0019205	nucleobase-containing compound kinase activity	3	12	0.324948	0.667134	A0A8I6WHD1;F2E8P3;F2EIL0
GO:0019842	vitamin binding	3	12	0.324948	0.667134	A0A8I6WGG3;A0A8I6WRJ2;F2CSE2
GO:0042393	histone binding	3	12	0.324948	0.667134	A0A287EZS0;A0A287U5M5;A0A8I6YZG5
GO:0048029	monosaccharide binding	3	12	0.324948	0.667134	A0A8I6WRJ2;F2CSE2;F2CW03
GO:0016772	transferase activity, transferring phosphorus-containing groups	27	147	0.326849	0.667134	A0A287EZV5;A0A287FP91;A0A287P008;A0A2P1AB13;A0A8I6WHD1;A0A8I6WXW1;A0A8I6X017;A0A8I6XCP7;A0A8I6XIK9;A0A8I6Z0S4;A0A8I7B1F6;F2CQV1;F2CVA4;F2CW03;F2D119;F2D480;F2DML2;F2DS97;F2DZN2;F2E2C7;F2E4M8;F2E8P3;F2E9X9;F2EFS9;F2EIL0;F2ELJ9;M0XGU8
GO:0005057	receptor signaling protein activity	2	7	0.332164	0.667134	A0A8I6XCP7;F2DS97
GO:0008106	alcohol dehydrogenase (NADP+) activity	2	7	0.332164	0.667134	A0A8I6XHC6;F2D700
GO:0016646	oxidoreductase activity, acting on the CH-NH group of donors, NAD or NADP as acceptor	2	7	0.332164	0.667134	A0A8I6XQX4;A0A8I6YWJ4
GO:0016709	oxidoreductase activity, acting on paired donors, with incorporation or reduction of molecular oxygen, NAD(P)H as one donor, and incorporation of one atom of oxygen	2	7	0.332164	0.667134	F2DZK7;W8E7E3
GO:0016833	oxo-acid-lyase activity	2	7	0.332164	0.667134	A0A8I6XFM0;F2DYM4
GO:0030515	snoRNA binding	2	7	0.332164	0.667134	F2CQY5;F2DZY3
GO:0031386	protein tag	2	7	0.332164	0.667134	A0A8I6YNI8;F2CW55
GO:0051920	peroxiredoxin activity	2	7	0.332164	0.667134	A0A8I6WHE5;A0A8I6XTB9
GO:0048037	cofactor binding	32	177	0.341979	0.684919	A0A287GYL8;A0A3S9KBF3;A0A8I6W9A2;A0A8I6WEH2;A0A8I6WGG3;A0A8I6XCQ2;A0A8I6XLS0;A0A8I6XNX9;A0A8I6XUQ8;A0A8I6YFL0;A0A8I6YQI6;A0A8I6YWJ4;A0A8I7B4C5;A0A8I7B935;A0A8I7BAB0;A0A8I7BJR0;F2CPN8;F2CQV7;F2CU23;F2CVB4;F2D1C6;F2D1W8;F2D2W5;F2D643;F2DHZ5;F2DMT1;F2DSA8;F2DYM4;F2E7W3;F2EDT9;F2EL27;F2ELT5
GO:0016747	transferase activity, transferring acyl groups other than amino-acyl groups	8	40	0.350562	0.700141	A0A8I6X472;A0A8I6YFN2;F2CPX3;F2CW53;F2DMT1;F2ECG8;F2ECK4;M0WAP6
GO:0097159	organic cyclic compound binding	199	1164	0.352934	0.702911	A0A287EZS0;A0A287EZV5;A0A287FP91;A0A287GYL8;A0A287JEP8;A0A287P008;A0A287PY01;A0A287Q7U2;A0A2P1AB13;A0A3S9KBF3;A0A5C1YV39;A0A8I6W9A2;A0A8I6WB19;A0A8I6WC09;A0A8I6WDS1;A0A8I6WDV9;A0A8I6WEH2;A0A8I6WFJ6;A0A8I6WGG3;A0A8I6WHD1;A0A8I6WKT1;A0A8I6WL52;A0A8I6WQV8;A0A8I6WV37;A0A8I6X017;A0A8I6X1I1;A0A8I6X313;A0A8I6X472;A0A8I6X660;A0A8I6X6B1;A0A8I6X6U8;A0A8I6X7G0;A0A8I6X8T5;A0A8I6XCQ2;A0A8I6XD40;A0A8I6XDB4;A0A…
GO:0008237	metallopeptidase activity	6	29	0.355082	0.703295	A0A8I6WT04;A0A8I6WT13;A0A8I6XSD2;A0A8I6YSG5;A0A8I6YUS4;F2DNP2
GO:0016854	racemase and epimerase activity	4	18	0.3551	0.703295	A0A287ILG2;A0A8I6XPB3;A0A8I6YK25;F2D1C6
GO:1901363	heterocyclic compound binding	198	1159	0.359008	0.709066	A0A287EZS0;A0A287EZV5;A0A287FP91;A0A287GYL8;A0A287JEP8;A0A287P008;A0A287PY01;A0A287Q7U2;A0A2P1AB13;A0A3S9KBF3;A0A5C1YV39;A0A8I6W9A2;A0A8I6WB19;A0A8I6WC09;A0A8I6WDS1;A0A8I6WDV9;A0A8I6WEH2;A0A8I6WFJ6;A0A8I6WGG3;A0A8I6WHD1;A0A8I6WKT1;A0A8I6WL52;A0A8I6WQV8;A0A8I6WV37;A0A8I6X017;A0A8I6X1I1;A0A8I6X313;A0A8I6X472;A0A8I6X660;A0A8I6X6B1;A0A8I6X6U8;A0A8I6X7G0;A0A8I6X8T5;A0A8I6XCQ2;A0A8I6XD40;A0A8I6XDB4;A0A…
GO:0008017	microtubule binding	3	13	0.374607	0.710464	A0A8I6X6U8;A0A8I6YCQ1;A0A8I6YKV1
GO:0016776	phosphotransferase activity, phosphate group as acceptor	3	13	0.374607	0.710464	A0A8I6WHD1;F2E8P3;F2EIL0
GO:0003743	translation initiation factor activity	8	41	0.377956	0.710464	A0A8I6WC09;A0A8I6XWQ1;A0A8I6Y2R8;F2CZL7;F2D788;F2DRT8;F2DXD4;M0YRX3
GO:0046914	transition metal ion binding	26	145	0.381261	0.710464	A0A8I6WDS1;A0A8I6WMI1;A0A8I6WRJ2;A0A8I6WWC5;A0A8I6X6J9;A0A8I6XF02;A0A8I6XGX1;A0A8I6XSD2;A0A8I6YF06;A0A8I6YS17;A0A8I6YSG5;A0A8I7BJR0;F2CPM4;F2CSE2;F2CVB4;F2D005;F2D5L4;F2DD34;F2DJM5;F2DZK7;F2E3M7;F2E7V8;F2EJZ7;F2ELJ9;M0Y7Q2;W8E7E3
GO:0016301	kinase activity	22	122	0.38541	0.710464	A0A287EZV5;A0A287FP91;A0A287P008;A0A8I6WHD1;A0A8I6WXW1;A0A8I6X017;A0A8I6XCP7;A0A8I6XIK9;A0A8I6Z0S4;A0A8I7B1F6;F2CQV1;F2CVA4;F2CW03;F2D480;F2DML2;F2DS97;F2DZN2;F2E2C7;F2E8P3;F2EFS9;F2EIL0;M0XGU8
GO:0004866	endopeptidase inhibitor activity	9	47	0.386189	0.710464	A0A287DTW3;A0A8I6WHB0;A8V3Q1;A8V3Y1;F2CUF5;F2E5X4;F2E8J4;M0XBS5;Q9M4C9
GO:0030414	peptidase inhibitor activity	9	47	0.386189	0.710464	A0A287DTW3;A0A8I6WHB0;A8V3Q1;A8V3Y1;F2CUF5;F2E5X4;F2E8J4;M0XBS5;Q9M4C9
GO:0004222	metalloendopeptidase activity	2	8	0.397591	0.710464	A0A8I6WT04;A0A8I6WT13
GO:0004869	cysteine-type endopeptidase inhibitor activity	2	8	0.397591	0.710464	F2CUF5;F2E5X4
GO:0046556	alpha-L-arabinofuranosidase activity	2	8	0.397591	0.710464	A0A8I6Y7K8;A0A8I6YF87
GO:0003729	mRNA binding	22	123	0.401528	0.710464	A0A8I6WC09;A0A8I6WL52;A0A8I6X1I1;A0A8I6X660;A0A8I6XD40;A0A8I6XDB4;A0A8I6Y6M4;A0A8I6YLT8;A0A8I6YNI8;A0A8I7BE86;F2CQ03;F2CRA3;F2CRW7;F2CS15;F2CXL5;F2D1K5;F2D6M6;F2DIA6;F2DLR6;F2DRT8;F2E4I7;M0X951
GO:0044822	poly(A) RNA binding	22	123	0.401528	0.710464	A0A8I6WC09;A0A8I6WL52;A0A8I6X1I1;A0A8I6X660;A0A8I6XD40;A0A8I6XDB4;A0A8I6Y6M4;A0A8I6YLT8;A0A8I6YNI8;A0A8I7BE86;F2CQ03;F2CRA3;F2CRW7;F2CS15;F2CXL5;F2D1K5;F2D6M6;F2DIA6;F2DLR6;F2DRT8;F2E4I7;M0X951
GO:0016462	pyrophosphatase activity	40	229	0.407902	0.710464	A0A287Q7U2;A0A8I6WB19;A0A8I6WDR3;A0A8I6X6U8;A0A8I6X6Y8;A0A8I6XE20;A0A8I6XNJ0;A0A8I6XQR9;A0A8I6XUG0;A0A8I6Y2R8;A0A8I6Y6M4;A0A8I6YCQ1;A0A8I6YF06;A0A8I6YKV1;A0A8I6YT49;A0A8I7B5T8;A0A8I7BBH0;A0A8I7BCY8;F2CRK6;F2CWN4;F2CWQ6;F2D5K0;F2D6M6;F2D7Z3;F2D8X9;F2DAU4;F2DC74;F2DE60;F2DJJ2;F2DPU4;F2DSU7;F2DUR4;F2DXB7;F2E0U3;F2E4I7;F2E6T9;F2EF80;M0WNW4;M0XN08;P34824
GO:0008509	anion transmembrane transporter activity	5	25	0.410001	0.710464	A0A8I6Y690;F2CUF1;F2D043;F2D8E6;F2DG80
GO:0061135	endopeptidase regulator activity	9	48	0.411998	0.710464	A0A287DTW3;A0A8I6WHB0;A8V3Q1;A8V3Y1;F2CUF5;F2E5X4;F2E8J4;M0XBS5;Q9M4C9
GO:0003924	GTPase activity	14	77	0.412557	0.710464	A0A287Q7U2;A0A8I6WB19;A0A8I6X6U8;A0A8I6XUG0;A0A8I6YKV1;A0A8I7BCY8;F2CWN4;F2DAU4;F2DE60;F2DXB7;F2E0U3;M0WNW4;M0XN08;P34824
GO:0046983	protein dimerization activity	11	60	0.42215	0.710464	A0A8I6WB26;A0A8I6WDV9;A0A8I6WKT1;A0A8I6WNS5;A0A8I6X313;A0A8I6X7G0;A0A8I6X8T5;A0A8I6XCP7;A0A8I6Y8S1;F2CUP3;F2EJV3
GO:0005525	GTP binding	17	95	0.422326	0.710464	A0A287Q7U2;A0A8I6WB19;A0A8I6X6U8;A0A8I6XUG0;A0A8I6XWQ1;A0A8I6YKV1;A0A8I6YQU0;A0A8I7BCY8;F2CWN4;F2DAU4;F2DE60;F2DVC1;F2DXB7;F2E0U3;M0WNW4;M0XN08;P34824
GO:0016773	phosphotransferase activity, alcohol group as acceptor	17	95	0.422326	0.710464	A0A287EZV5;A0A287FP91;A0A287P008;A0A8I6X017;A0A8I6XCP7;A0A8I6XIK9;A0A8I6Z0S4;A0A8I7B1F6;F2CVA4;F2CW03;F2D480;F2DML2;F2DS97;F2DZN2;F2E2C7;F2EFS9;M0XGU8
GO:0019001	guanyl nucleotide binding	17	95	0.422326	0.710464	A0A287Q7U2;A0A8I6WB19;A0A8I6X6U8;A0A8I6XUG0;A0A8I6XWQ1;A0A8I6YKV1;A0A8I6YQU0;A0A8I7BCY8;F2CWN4;F2DAU4;F2DE60;F2DVC1;F2DXB7;F2E0U3;M0WNW4;M0XN08;P34824
GO:0032561	guanyl ribonucleotide binding	17	95	0.422326	0.710464	A0A287Q7U2;A0A8I6WB19;A0A8I6X6U8;A0A8I6XUG0;A0A8I6XWQ1;A0A8I6YKV1;A0A8I6YQU0;A0A8I7BCY8;F2CWN4;F2DAU4;F2DE60;F2DVC1;F2DXB7;F2E0U3;M0WNW4;M0XN08;P34824
GO:0000035	acyl binding	1	3	0.422866	0.710464	F2D2W5
GO:0003825	alpha,alpha-trehalose-phosphate synthase (UDP-forming) activity	1	3	0.422866	0.710464	F2DQH1
GO:0003844	1,4-alpha-glucan branching enzyme activity	1	3	0.422866	0.710464	A0A8I7BFU9
GO:0003995	acyl-CoA dehydrogenase activity	1	3	0.422866	0.710464	A0A8I6XCQ2
GO:0004128	cytochrome-b5 reductase activity, acting on NAD(P)H	1	3	0.422866	0.710464	F2E5P4
GO:0004148	dihydrolipoyl dehydrogenase activity	1	3	0.422866	0.710464	A0A8I6WEH2
GO:0004165	dodecenoyl-CoA delta-isomerase activity	1	3	0.422866	0.710464	F2D1C6
GO:0004345	glucose-6-phosphate dehydrogenase activity	1	3	0.422866	0.710464	A0A3S9KBF3
GO:0004373	glycogen (starch) synthase activity	1	3	0.422866	0.710464	C3W8L3
GO:0004407	histone deacetylase activity	1	3	0.422866	0.710464	A0A8I6X899
GO:0004449	isocitrate dehydrogenase (NAD+) activity	1	3	0.422866	0.710464	F2DS63
GO:0004473	malate dehydrogenase (decarboxylating) (NADP+) activity	1	3	0.422866	0.710464	F2ELT5
GO:0004576	oligosaccharyl transferase activity	1	3	0.422866	0.710464	A0A8I6XRV2
GO:0004618	phosphoglycerate kinase activity	1	3	0.422866	0.710464	F2CQV1
GO:0004702	receptor signaling protein serine/threonine kinase activity	1	3	0.422866	0.710464	F2DS97
GO:0004707	MAP kinase activity	1	3	0.422866	0.710464	F2DS97
GO:0004791	thioredoxin-disulfide reductase activity	1	3	0.422866	0.710464	F2CQX6
GO:0008374	O-acyltransferase activity	1	3	0.422866	0.710464	F2CPX3
GO:0008553	hydrogen-exporting ATPase activity, phosphorylative mechanism	1	3	0.422866	0.710464	A0A8I6XQR9
GO:0009041	uridylate kinase activity	1	3	0.422866	0.710464	F2EIL0
GO:0015066	alpha-amylase inhibitor activity	1	3	0.422866	0.710464	F2E8J4
GO:0016208	AMP binding	1	3	0.422866	0.710464	F2E3X1
GO:0016421	CoA carboxylase activity	1	3	0.422866	0.710464	A0A5C1YV39
GO:0016682	oxidoreductase activity, acting on diphenols and related substances as donors, oxygen as acceptor	1	3	0.422866	0.710464	D7USP2
GO:0016710	trans-cinnamate 4-monooxygenase activity	1	3	0.422866	0.710464	W8E7E3
GO:0016885	ligase activity, forming carbon-carbon bonds	1	3	0.422866	0.710464	A0A5C1YV39
GO:0030598	rRNA N-glycosylase activity	1	3	0.422866	0.710464	A0A8I6Z9Z3
GO:0030942	endoplasmic reticulum signal peptide binding	1	3	0.422866	0.710464	F2CWN4
GO:0033558	protein deacetylase activity	1	3	0.422866	0.710464	A0A8I6X899
GO:0033862	UMP kinase activity	1	3	0.422866	0.710464	F2EIL0
GO:0043539	protein serine/threonine kinase activator activity	1	3	0.422866	0.710464	F2DML2
GO:0045551	cinnamyl-alcohol dehydrogenase activity	1	3	0.422866	0.710464	F2E7V8
GO:0046524	sucrose-phosphate synthase activity	1	3	0.422866	0.710464	A0A8I6XI70
GO:0046910	pectinesterase inhibitor activity	1	3	0.422866	0.710464	F2ELP4
GO:0051787	misfolded protein binding	1	3	0.422866	0.710464	A0A8I6Y5Z0
GO:0070181	small ribosomal subunit rRNA binding	1	3	0.422866	0.710464	F2CVM4
GO:0070402	NADPH binding	1	3	0.422866	0.710464	A0A8I6XLS0
GO:0070567	cytidylyltransferase activity	1	3	0.422866	0.710464	F2E9X9
GO:0071568	UFM1 transferase activity	1	3	0.422866	0.710464	F2E3I5
GO:0097602	cullin family protein binding	1	3	0.422866	0.710464	F2D7S9
GO:1990380	Lys48-specific deubiquitinase activity	1	3	0.422866	0.710464	F2DNP6
GO:0031267	small GTPase binding	3	14	0.423489	0.710464	A0A287JEP8;A0A8I6XBH2;F2DLD7
GO:0051020	GTPase binding	3	14	0.423489	0.710464	A0A287JEP8;A0A8I6XBH2;F2DLD7
GO:0004867	serine-type endopeptidase inhibitor activity	7	37	0.427119	0.714874	A0A287DTW3;A0A8I6WHB0;A8V3Q1;A8V3Y1;F2E8J4;M0XBS5;Q9M4C9
GO:0003724	RNA helicase activity	4	20	0.436982	0.725926	A0A8I6Y2R8;F2D6M6;F2DPU4;F2E4I7
GO:0043565	sequence-specific DNA binding	4	20	0.436982	0.725926	A0A8I6XLR3;F2CVL6;F2ECG8;M0Y7Q2
GO:0005215	transporter activity	24	137	0.437591	0.725926	A0A8I6WDR3;A0A8I6WG88;A0A8I6WIT4;A0A8I6X6Y8;A0A8I6XE20;A0A8I6XNJ0;A0A8I6XQR9;A0A8I6Y690;A0A8I7B5T8;F2CRK6;F2CUF1;F2CWC9;F2CWF3;F2CWQ6;F2D043;F2D8E6;F2DG80;F2DGM5;F2DJJ2;F2DXG7;F2E110;F2EBY7;F2EF80;Q4A1H2
GO:0061134	peptidase regulator activity	9	49	0.437795	0.725926	A0A287DTW3;A0A8I6WHB0;A8V3Q1;A8V3Y1;F2CUF5;F2E5X4;F2E8J4;M0XBS5;Q9M4C9
GO:0000149	SNARE binding	5	26	0.445641	0.735514	A0A8I6WMI1;A0A8I6X8X0;A0A8I6YXG1;F2DRI5;F2E298
GO:0004252	serine-type endopeptidase activity	5	26	0.445641	0.735514	A0A8I6XQV5;A0A8I6Y5Z0;A0A8I7B6V7;F2DTJ0;F2E6T9
GO:0000977	RNA polymerase II regulatory region sequence-specific DNA binding	2	9	0.459867	0.75031	A0A8I6XLR3;F2ECG8
GO:0001012	RNA polymerase II regulatory region DNA binding	2	9	0.459867	0.75031	A0A8I6XLR3;F2ECG8
GO:0016668	oxidoreductase activity, acting on a sulfur group of donors, NAD(P) as acceptor	2	9	0.459867	0.75031	A0A8I6WEH2;F2CQX6
GO:0016840	carbon-nitrogen lyase activity	2	9	0.459867	0.75031	A0A287SCX5;F2CWG0
GO:0070006	metalloaminopeptidase activity	2	9	0.459867	0.75031	A0A8I6YSG5;F2DNP2
GO:0017111	nucleoside-triphosphatase activity	36	210	0.465709	0.758107	A0A287Q7U2;A0A8I6WB19;A0A8I6WDR3;A0A8I6X6U8;A0A8I6X6Y8;A0A8I6XE20;A0A8I6XNJ0;A0A8I6XQR9;A0A8I6XUG0;A0A8I6Y2R8;A0A8I6Y6M4;A0A8I6YCQ1;A0A8I6YKV1;A0A8I6YT49;A0A8I7B5T8;A0A8I7BCY8;F2CRK6;F2CWN4;F2CWQ6;F2D5K0;F2D6M6;F2D8X9;F2DAU4;F2DC74;F2DE60;F2DJJ2;F2DPU4;F2DUR4;F2DXB7;F2E0U3;F2E4I7;F2E6T9;F2EF80;M0WNW4;M0XN08;P34824
GO:0016811	hydrolase activity, acting on carbon-nitrogen (but not peptide) bonds, in linear amides	3	15	0.470986	0.763211	A0A8I6X899;A0A8I6XA88;A0A8I6YTX6
GO:0019843	rRNA binding	3	15	0.470986	0.763211	F2CVM4;F2D702;F2DIR3
GO:0004497	monooxygenase activity	4	21	0.476878	0.771007	A0A8I6XDR0;A0A8I7B935;F2DZK7;W8E7E3
GO:0036094	small molecule binding	107	634	0.478186	0.771373	A0A287EZV5;A0A287FP91;A0A287GYL8;A0A287P008;A0A287Q7U2;A0A2P1AB13;A0A3S9KBF3;A0A5C1YV39;A0A8I6W9A2;A0A8I6WB19;A0A8I6WEH2;A0A8I6WGG3;A0A8I6WHD1;A0A8I6WQV8;A0A8I6WRJ2;A0A8I6X017;A0A8I6X472;A0A8I6X6B1;A0A8I6X6U8;A0A8I6XCQ2;A0A8I6XLS0;A0A8I6XMW6;A0A8I6XNJ0;A0A8I6XQR9;A0A8I6XTL4;A0A8I6XUG0;A0A8I6XUQ8;A0A8I6XWQ1;A0A8I6XX88;A0A8I6Y2R8;A0A8I6Y4J8;A0A8I6YCQ1;A0A8I6YFL0;A0A8I6YKV1;A0A8I6YQU0;A0A8I6YS17;A0A…
GO:0022857	transmembrane transporter activity	20	116	0.48092	0.773371	A0A8I6WDR3;A0A8I6WG88;A0A8I6X6Y8;A0A8I6XE20;A0A8I6XNJ0;A0A8I6XQR9;A0A8I6Y690;A0A8I7B5T8;F2CRK6;F2CUF1;F2CWF3;F2CWQ6;F2D043;F2D8E6;F2DG80;F2DJJ2;F2DXG7;F2E110;F2EF80;Q4A1H2
GO:0000166	nucleotide binding	100	595	0.500769	0.773371	A0A287EZV5;A0A287FP91;A0A287GYL8;A0A287P008;A0A287Q7U2;A0A2P1AB13;A0A3S9KBF3;A0A5C1YV39;A0A8I6W9A2;A0A8I6WB19;A0A8I6WEH2;A0A8I6WHD1;A0A8I6WQV8;A0A8I6X017;A0A8I6X472;A0A8I6X6B1;A0A8I6X6U8;A0A8I6XCQ2;A0A8I6XLS0;A0A8I6XNJ0;A0A8I6XQR9;A0A8I6XUG0;A0A8I6XUQ8;A0A8I6XWQ1;A0A8I6XX88;A0A8I6Y2R8;A0A8I6Y4J8;A0A8I6YCQ1;A0A8I6YFL0;A0A8I6YKV1;A0A8I6YQU0;A0A8I6YS17;A0A8I6YT49;A0A8I6YWJ4;A0A8I6Z0S4;A0A8I7B1F6;A0A…
GO:1901265	nucleoside phosphate binding	100	595	0.500769	0.773371	A0A287EZV5;A0A287FP91;A0A287GYL8;A0A287P008;A0A287Q7U2;A0A2P1AB13;A0A3S9KBF3;A0A5C1YV39;A0A8I6W9A2;A0A8I6WB19;A0A8I6WEH2;A0A8I6WHD1;A0A8I6WQV8;A0A8I6X017;A0A8I6X472;A0A8I6X6B1;A0A8I6X6U8;A0A8I6XCQ2;A0A8I6XLS0;A0A8I6XNJ0;A0A8I6XQR9;A0A8I6XUG0;A0A8I6XUQ8;A0A8I6XWQ1;A0A8I6XX88;A0A8I6Y2R8;A0A8I6Y4J8;A0A8I6YCQ1;A0A8I6YFL0;A0A8I6YKV1;A0A8I6YQU0;A0A8I6YS17;A0A8I6YT49;A0A8I6YWJ4;A0A8I6Z0S4;A0A8I7B1F6;A0A…
GO:0031406	carboxylic acid binding	5	28	0.515017	0.773371	A0A8I6WRJ2;A0A8I6XMW6;A0A8I6XTL4;F2CSE2;F2DAR0
GO:0043177	organic acid binding	5	28	0.515017	0.773371	A0A8I6WRJ2;A0A8I6XMW6;A0A8I6XTL4;F2CSE2;F2DAR0
GO:0003755	peptidyl-prolyl cis-trans isomerase activity	4	22	0.515641	0.773371	A0A8I6XBL5;A0A8I6YSL3;A0A8I7B4F1;F2DVI8
GO:0004721	phosphoprotein phosphatase activity	4	22	0.515641	0.773371	A0A8I6Y3M9;F2CX03;F2D8Z5;F2DPN4
GO:0016620	oxidoreductase activity, acting on the aldehyde or oxo group of donors, NAD or NADP as acceptor	4	22	0.515641	0.773371	A0A8I6XYN6;A0A8I6Z0L1;F2CU23;F2CXT3
GO:0031072	heat shock protein binding	4	22	0.515641	0.773371	A0A8I6XBL4;A0A8I6YD95;A0A8I6YKD5;A0A8I7B3J5
GO:0004843	thiol-dependent ubiquitin-specific protease activity	3	16	0.516628	0.773371	A0A8I7B2U1;F2DC93;F2DNP6
GO:0015631	tubulin binding	3	16	0.516628	0.773371	A0A8I6X6U8;A0A8I6YCQ1;A0A8I6YKV1
GO:0016866	intramolecular transferase activity	3	16	0.516628	0.773371	A0A0U2GJJ3;A0A0U2GJL1;F2DDD5
GO:0036459	thiol-dependent ubiquitinyl hydrolase activity	3	16	0.516628	0.773371	A0A8I7B2U1;F2DC93;F2DNP6
GO:0004029	aldehyde dehydrogenase (NAD) activity	2	10	0.518215	0.773371	A0A8I6XYN6;F2CXT3
GO:0008235	metalloexopeptidase activity	2	10	0.518215	0.773371	A0A8I6YSG5;F2DNP2
GO:0031369	translation initiation factor binding	2	10	0.518215	0.773371	A0A8I6XWQ1;F2E3M7
GO:0000104	succinate dehydrogenase activity	1	4	0.519558	0.773371	F2EL27
GO:0004127	cytidylate kinase activity	1	4	0.519558	0.773371	F2EIL0
GO:0004332	fructose-bisphosphate aldolase activity	1	4	0.519558	0.773371	A0A8I6XBW8
GO:0004565	beta-galactosidase activity	1	4	0.519558	0.773371	A0A8I6XUU4
GO:0004839	ubiquitin activating enzyme activity	1	4	0.519558	0.773371	F2DHP2
GO:0005049	nuclear export signal receptor activity	1	4	0.519558	0.773371	A0A8I6WIT4
GO:0005102	receptor binding	1	4	0.519558	0.773371	A0A8I6WF91
GO:0005546	phosphatidylinositol-4,5-bisphosphate binding	1	4	0.519558	0.773371	A0A8I6X0Z2
GO:0008177	succinate dehydrogenase (ubiquinone) activity	1	4	0.519558	0.773371	F2EL27
GO:0008878	glucose-1-phosphate adenylyltransferase activity	1	4	0.519558	0.773371	A0A2P1AB13
GO:0009044	xylan 1,4-beta-xylosidase activity	1	4	0.519558	0.773371	A0A8I6YF87
GO:0016639	oxidoreductase activity, acting on the CH-NH2 group of donors, NAD or NADP as acceptor	1	4	0.519558	0.773371	F2E0P9
GO:0016653	oxidoreductase activity, acting on NAD(P)H, heme protein as acceptor	1	4	0.519558	0.773371	F2E5P4
GO:0016670	oxidoreductase activity, acting on a sulfur group of donors, oxygen as acceptor	1	4	0.519558	0.773371	F2CVB4
GO:0019213	deacetylase activity	1	4	0.519558	0.773371	A0A8I6X899
GO:0030597	RNA glycosylase activity	1	4	0.519558	0.773371	A0A8I6Z9Z3
GO:0030941	chloroplast targeting sequence binding	1	4	0.519558	0.773371	A0A8I6XNN7
GO:0032050	clathrin heavy chain binding	1	4	0.519558	0.773371	A0A8I6Z7P9
GO:0051119	sugar transmembrane transporter activity	1	4	0.519558	0.773371	Q4A1H2
GO:0097599	xylanase activity	1	4	0.519558	0.773371	A0A8I6YF87
GO:1990247	N6-methyladenosine-containing RNA binding	1	4	0.519558	0.773371	F2CQ03
GO:0004812	aminoacyl-tRNA ligase activity	5	29	0.548337	0.811129	A0A8I6WQV8;F2E5S3;F2E941;F2EFV3;M0XNG3
GO:0016875	ligase activity, forming carbon-oxygen bonds	5	29	0.548337	0.811129	A0A8I6WQV8;F2E5S3;F2E941;F2EFV3;M0XNG3
GO:0016876	ligase activity, forming aminoacyl-tRNA and related compounds	5	29	0.548337	0.811129	A0A8I6WQV8;F2E5S3;F2E941;F2EFV3;M0XNG3
GO:0003723	RNA binding	66	397	0.549767	0.811561	A0A8I6WC09;A0A8I6WFJ6;A0A8I6WL52;A0A8I6X1I1;A0A8I6X472;A0A8I6X660;A0A8I6XD40;A0A8I6XDB4;A0A8I6XEF6;A0A8I6XEW3;A0A8I6XF02;A0A8I6XUG0;A0A8I6XWQ1;A0A8I6Y2R8;A0A8I6Y6M4;A0A8I6Y871;A0A8I6YBH6;A0A8I6YF06;A0A8I6YF47;A0A8I6YLT8;A0A8I6YNI8;A0A8I7BE86;A0A8I7BFP1;F2CQ03;F2CQY5;F2CRA3;F2CRW7;F2CS15;F2CT73;F2CTB3;F2CVL6;F2CVM4;F2CWN4;F2CXL5;F2CZL7;F2D1K5;F2D205;F2D3D5;F2D4K2;F2D6M6;F2D702;F2D788;F2DAK3;F2DAU4…
GO:0019783	ubiquitin-like protein-specific protease activity	3	17	0.560066	0.825056	A0A8I7B2U1;F2DC93;F2DNP6
GO:0005085	guanyl-nucleotide exchange factor activity	2	11	0.572203	0.833765	A0A8I6XBH2;A0A8I7B2K7
GO:0016645	oxidoreductase activity, acting on the CH-NH group of donors	2	11	0.572203	0.833765	A0A8I6XQX4;A0A8I6YWJ4
GO:0044183	protein binding involved in protein folding	2	11	0.572203	0.833765	F2CTS4;F2DB07
GO:0005506	iron ion binding	5	30	0.580521	0.833765	A0A8I6WRJ2;F2CSE2;F2D5L4;F2DZK7;W8E7E3
GO:0016903	oxidoreductase activity, acting on the aldehyde or oxo group of donors	5	30	0.580521	0.833765	A0A8I6WGG3;A0A8I6XYN6;A0A8I6Z0L1;F2CU23;F2CXT3
GO:0016779	nucleotidyltransferase activity	4	24	0.58881	0.833765	A0A2P1AB13;F2E4M8;F2E9X9;F2ELJ9
GO:0016859	cis-trans isomerase activity	4	24	0.58881	0.833765	A0A8I6XBL5;A0A8I6YSL3;A0A8I7B4F1;F2DVI8
GO:0050660	flavin adenine dinucleotide binding	7	43	0.596432	0.833765	A0A8I6WEH2;A0A8I6XCQ2;A0A8I6YWJ4;A0A8I7B935;F2D1W8;F2DSA8;F2EL27
GO:0003684	damaged DNA binding	1	5	0.600078	0.833765	F2DUJ6
GO:0003713	transcription coactivator activity	1	5	0.600078	0.833765	F2DUE6
GO:0004176	ATP-dependent peptidase activity	1	5	0.600078	0.833765	F2E6T9
GO:0004470	malic enzyme activity	1	5	0.600078	0.833765	F2ELT5
GO:0004611	phosphoenolpyruvate carboxykinase activity	1	5	0.600078	0.833765	F2DEG9
GO:0004805	trehalose-phosphatase activity	1	5	0.600078	0.833765	F2DQH1
GO:0005496	steroid binding	1	5	0.600078	0.833765	Q38JE4
GO:0008239	dipeptidyl-peptidase activity	1	5	0.600078	0.833765	A0A8I6Y6N4
GO:0008252	nucleotidase activity	1	5	0.600078	0.833765	F2DGW2
GO:0015144	carbohydrate transmembrane transporter activity	1	5	0.600078	0.833765	Q4A1H2
GO:0016161	beta-amylase activity	1	5	0.600078	0.833765	F2EFV1
GO:0016742	hydroxymethyl-, formyl- and related transferase activity	1	5	0.600078	0.833765	A0A8I6XD03
GO:0019202	amino acid kinase activity	1	5	0.600078	0.833765	F2E2C7
GO:0030619	U1 snRNA binding	1	5	0.600078	0.833765	F2DE93
GO:0032934	sterol binding	1	5	0.600078	0.833765	Q38JE4
GO:0043531	ADP binding	1	5	0.600078	0.833765	F2CQV1
GO:0051117	ATPase binding	1	5	0.600078	0.833765	F2E6T9
GO:1901476	carbohydrate transporter activity	1	5	0.600078	0.833765	Q4A1H2
GO:1902936	phosphatidylinositol bisphosphate binding	1	5	0.600078	0.833765	A0A8I6X0Z2
GO:0004722	protein serine/threonine phosphatase activity	3	18	0.601059	0.833765	A0A8I6Y3M9;F2D8Z5;F2DPN4
GO:0005096	GTPase activator activity	3	18	0.601059	0.833765	A0A8I6WTQ8;F2D8Y6;M0WNW4
GO:0101005	ubiquitinyl hydrolase activity	3	18	0.601059	0.833765	A0A8I7B2U1;F2DC93;F2DNP6
GO:0004386	helicase activity	5	31	0.611441	0.842902	A0A8I6Y2R8;A0A8I6Y6M4;F2D6M6;F2DPU4;F2E4I7
GO:0016684	oxidoreductase activity, acting on peroxide as acceptor	5	31	0.611441	0.842902	A0A8I6WHE5;A0A8I6XTB9;A0A8I6YHJ3;A0A8I6YXG5;F2CPL2
GO:0016746	transferase activity, transferring acyl groups	8	50	0.615492	0.842902	A0A8I6X472;A0A8I6YFN2;F2CPX3;F2CW53;F2DMT1;F2ECG8;F2ECK4;M0WAP6
GO:0000975	regulatory region DNA binding	2	12	0.621654	0.842902	A0A8I6XLR3;F2ECG8
GO:0000976	transcription regulatory region sequence-specific DNA binding	2	12	0.621654	0.842902	A0A8I6XLR3;F2ECG8
GO:0001067	regulatory region nucleic acid binding	2	12	0.621654	0.842902	A0A8I6XLR3;F2ECG8
GO:0017018	myosin phosphatase activity	2	12	0.621654	0.842902	F2D8Z5;F2DPN4
GO:0030145	manganese ion binding	2	12	0.621654	0.842902	A0A8I6YF06;A0A8I6YSG5
GO:0043178	alcohol binding	2	12	0.621654	0.842902	F2DAR0;Q38JE4
GO:0044212	transcription regulatory region DNA binding	2	12	0.621654	0.842902	A0A8I6XLR3;F2ECG8
GO:0061650	ubiquitin-like protein conjugating enzyme activity	2	12	0.621654	0.842902	F2CQH9;F2E3I5
GO:0008289	lipid binding	10	63	0.626772	0.842902	A0A287NWK0;A0A8I6X0Z2;A0A8I6XTL4;F2CWC9;F2D9V7;F2DAR0;F2DGM5;F2EEH9;Q38JE4;Q5UNP2
GO:0016798	hydrolase activity, acting on glycosyl bonds	17	107	0.635901	0.842902	A0A8I6W6F0;A0A8I6WD99;A0A8I6WH69;A0A8I6WVW5;A0A8I6WXY7;A0A8I6XH57;A0A8I6XPG4;A0A8I6XUU4;A0A8I6Y7K8;A0A8I6YF87;A0A8I6YIR4;A0A8I6Z9Z3;A0A8I7B5I9;A0A8I7BFU9;F2DLA3;F2EFV1;Q42835
GO:0004553	hydrolase activity, hydrolyzing O-glycosyl compounds	16	101	0.639165	0.842902	A0A8I6W6F0;A0A8I6WD99;A0A8I6WH69;A0A8I6WVW5;A0A8I6WXY7;A0A8I6XH57;A0A8I6XPG4;A0A8I6XUU4;A0A8I6Y7K8;A0A8I6YF87;A0A8I6YIR4;A0A8I7B5I9;A0A8I7BFU9;F2DLA3;F2EFV1;Q42835
GO:0001882	nucleoside binding	75	463	0.65454	0.842902	A0A287EZV5;A0A287FP91;A0A287P008;A0A287Q7U2;A0A2P1AB13;A0A5C1YV39;A0A8I6WB19;A0A8I6WHD1;A0A8I6WQV8;A0A8I6X017;A0A8I6X472;A0A8I6X6B1;A0A8I6X6U8;A0A8I6XNJ0;A0A8I6XQR9;A0A8I6XUG0;A0A8I6XWQ1;A0A8I6XX88;A0A8I6Y2R8;A0A8I6Y4J8;A0A8I6YCQ1;A0A8I6YKV1;A0A8I6YQU0;A0A8I6YS17;A0A8I6YT49;A0A8I6Z0S4;A0A8I7B1F6;A0A8I7BAP0;A0A8I7BCY8;F2CQH9;F2CQV1;F2CTS4;F2CVA4;F2CW03;F2CWN4;F2D480;F2D484;F2D4P0;F2D5K0;F2D6M6;F2D…
GO:0001883	purine nucleoside binding	75	463	0.65454	0.842902	A0A287EZV5;A0A287FP91;A0A287P008;A0A287Q7U2;A0A2P1AB13;A0A5C1YV39;A0A8I6WB19;A0A8I6WHD1;A0A8I6WQV8;A0A8I6X017;A0A8I6X472;A0A8I6X6B1;A0A8I6X6U8;A0A8I6XNJ0;A0A8I6XQR9;A0A8I6XUG0;A0A8I6XWQ1;A0A8I6XX88;A0A8I6Y2R8;A0A8I6Y4J8;A0A8I6YCQ1;A0A8I6YKV1;A0A8I6YQU0;A0A8I6YS17;A0A8I6YT49;A0A8I6Z0S4;A0A8I7B1F6;A0A8I7BAP0;A0A8I7BCY8;F2CQH9;F2CQV1;F2CTS4;F2CVA4;F2CW03;F2CWN4;F2D480;F2D484;F2D4P0;F2D5K0;F2D6M6;F2D…
GO:0032549	ribonucleoside binding	75	463	0.65454	0.842902	A0A287EZV5;A0A287FP91;A0A287P008;A0A287Q7U2;A0A2P1AB13;A0A5C1YV39;A0A8I6WB19;A0A8I6WHD1;A0A8I6WQV8;A0A8I6X017;A0A8I6X472;A0A8I6X6B1;A0A8I6X6U8;A0A8I6XNJ0;A0A8I6XQR9;A0A8I6XUG0;A0A8I6XWQ1;A0A8I6XX88;A0A8I6Y2R8;A0A8I6Y4J8;A0A8I6YCQ1;A0A8I6YKV1;A0A8I6YQU0;A0A8I6YS17;A0A8I6YT49;A0A8I6Z0S4;A0A8I7B1F6;A0A8I7BAP0;A0A8I7BCY8;F2CQH9;F2CQV1;F2CTS4;F2CVA4;F2CW03;F2CWN4;F2D480;F2D484;F2D4P0;F2D5K0;F2D6M6;F2D…
GO:0032550	purine ribonucleoside binding	75	463	0.65454	0.842902	A0A287EZV5;A0A287FP91;A0A287P008;A0A287Q7U2;A0A2P1AB13;A0A5C1YV39;A0A8I6WB19;A0A8I6WHD1;A0A8I6WQV8;A0A8I6X017;A0A8I6X472;A0A8I6X6B1;A0A8I6X6U8;A0A8I6XNJ0;A0A8I6XQR9;A0A8I6XUG0;A0A8I6XWQ1;A0A8I6XX88;A0A8I6Y2R8;A0A8I6Y4J8;A0A8I6YCQ1;A0A8I6YKV1;A0A8I6YQU0;A0A8I6YS17;A0A8I6YT49;A0A8I6Z0S4;A0A8I7B1F6;A0A8I7BAP0;A0A8I7BCY8;F2CQH9;F2CQV1;F2CTS4;F2CVA4;F2CW03;F2CWN4;F2D480;F2D484;F2D4P0;F2D5K0;F2D6M6;F2D…
GO:0032555	purine ribonucleotide binding	75	463	0.65454	0.842902	A0A287EZV5;A0A287FP91;A0A287P008;A0A287Q7U2;A0A2P1AB13;A0A5C1YV39;A0A8I6WB19;A0A8I6WHD1;A0A8I6WQV8;A0A8I6X017;A0A8I6X472;A0A8I6X6B1;A0A8I6X6U8;A0A8I6XNJ0;A0A8I6XQR9;A0A8I6XUG0;A0A8I6XWQ1;A0A8I6XX88;A0A8I6Y2R8;A0A8I6Y4J8;A0A8I6YCQ1;A0A8I6YKV1;A0A8I6YQU0;A0A8I6YS17;A0A8I6YT49;A0A8I6Z0S4;A0A8I7B1F6;A0A8I7BAP0;A0A8I7BCY8;F2CQH9;F2CQV1;F2CTS4;F2CVA4;F2CW03;F2CWN4;F2D480;F2D484;F2D4P0;F2D5K0;F2D6M6;F2D…
GO:0016879	ligase activity, forming carbon-nitrogen bonds	4	26	0.655092	0.842902	A0A8I6X6B1;A0A8I6Y4J8;F2DR63;F2E3I7
GO:0017076	purine nucleotide binding	76	470	0.662253	0.842902	A0A287EZV5;A0A287FP91;A0A287P008;A0A287Q7U2;A0A2P1AB13;A0A5C1YV39;A0A8I6WB19;A0A8I6WHD1;A0A8I6WQV8;A0A8I6X017;A0A8I6X472;A0A8I6X6B1;A0A8I6X6U8;A0A8I6XNJ0;A0A8I6XQR9;A0A8I6XUG0;A0A8I6XWQ1;A0A8I6XX88;A0A8I6Y2R8;A0A8I6Y4J8;A0A8I6YCQ1;A0A8I6YKV1;A0A8I6YQU0;A0A8I6YS17;A0A8I6YT49;A0A8I6Z0S4;A0A8I7B1F6;A0A8I7B659;A0A8I7BAP0;A0A8I7BCY8;F2CQH9;F2CQV1;F2CTS4;F2CVA4;F2CW03;F2CWN4;F2D480;F2D484;F2D4P0;F2D5K0…
GO:0044877	macromolecular complex binding	14	90	0.664074	0.842902	A0A287EZS0;A0A287U5M5;A0A8I6WV37;A0A8I6X6U8;A0A8I6XEF6;A0A8I6YCQ1;A0A8I6YKQ7;A0A8I6YKV1;A0A8I6YL06;A0A8I6YZG5;F2DAU4;F2DUJ6;F2EHE1;F2EJZ7
GO:0044389	ubiquitin-like protein ligase binding	2	13	0.666571	0.842902	A0A8I6YNI8;F2CW55
GO:1990837	sequence-specific double-stranded DNA binding	2	13	0.666571	0.842902	A0A8I6XLR3;F2ECG8
GO:0001055	RNA polymerase II activity	1	6	0.667126	0.842902	F2E4M8
GO:0003872	6-phosphofructokinase activity	1	6	0.667126	0.842902	A0A8I7B1F6
GO:0003899	DNA-directed RNA polymerase activity	1	6	0.667126	0.842902	F2E4M8
GO:0004301	epoxide hydrolase activity	1	6	0.667126	0.842902	A0A8I6YMC3
GO:0004340	glucokinase activity	1	6	0.667126	0.842902	F2CW03
GO:0004448	isocitrate dehydrogenase activity	1	6	0.667126	0.842902	F2DS63
GO:0004683	calmodulin-dependent protein kinase activity	1	6	0.667126	0.842902	M0XGU8
GO:0005536	glucose binding	1	6	0.667126	0.842902	F2CW03
GO:0008081	phosphoric diester hydrolase activity	1	6	0.667126	0.842902	M0WQ79
GO:0008312	7S RNA binding	1	6	0.667126	0.842902	F2CWN4
GO:0008379	thioredoxin peroxidase activity	1	6	0.667126	0.842902	A0A8I6XTB9
GO:0009931	calcium-dependent protein serine/threonine kinase activity	1	6	0.667126	0.842902	M0XGU8
GO:0010427	abscisic acid binding	1	6	0.667126	0.842902	F2DAR0
GO:0010857	calcium-dependent protein kinase activity	1	6	0.667126	0.842902	M0XGU8
GO:0015215	nucleotide transmembrane transporter activity	1	6	0.667126	0.842902	F2DG80
GO:0016679	oxidoreductase activity, acting on diphenols and related substances as donors	1	6	0.667126	0.842902	D7USP2
GO:0016799	hydrolase activity, hydrolyzing N-glycosyl compounds	1	6	0.667126	0.842902	A0A8I6Z9Z3
GO:0016803	ether hydrolase activity	1	6	0.667126	0.842902	A0A8I6YMC3
GO:0016863	intramolecular oxidoreductase activity, transposing C=C bonds	1	6	0.667126	0.842902	F2D1C6
GO:0016881	acid-amino acid ligase activity	1	6	0.667126	0.842902	F2DR63
GO:0019840	isoprenoid binding	1	6	0.667126	0.842902	F2DAR0
GO:0030628	pre-mRNA 3'-splice site binding	1	6	0.667126	0.842902	F2D205
GO:0034062	RNA polymerase activity	1	6	0.667126	0.842902	F2E4M8
GO:0035615	clathrin adaptor activity	1	6	0.667126	0.842902	A0A8I6YC75
GO:0098748	endocytic adaptor activity	1	6	0.667126	0.842902	A0A8I6YC75
GO:1901981	phosphatidylinositol phosphate binding	1	6	0.667126	0.842902	A0A8I6X0Z2
GO:0016874	ligase activity	13	84	0.668945	0.842902	A0A5C1YV39;A0A8I6WQV8;A0A8I6X6B1;A0A8I6Y4J8;A0A8I6YHZ7;A0A8I7BF02;F2DHP2;F2DR63;F2E3I7;F2E5S3;F2E941;F2EFV3;M0XNG3
GO:0008234	cysteine-type peptidase activity	5	33	0.66912	0.842902	A0A8I7B2U1;B4ESE6;F2DC93;F2DDC9;F2DNP6
GO:0071949	FAD binding	3	20	0.675189	0.849047	A0A8I6YWJ4;F2D1W8;F2DSA8
GO:0004175	endopeptidase activity	11	72	0.680485	0.852699	A0A8I6WT04;A0A8I6WT13;A0A8I6XQV5;A0A8I6Y5W5;A0A8I6Y5Z0;A0A8I7B6V7;B4ESE6;F2CQA9;F2DDC9;F2DTJ0;F2E6T9
GO:0051082	unfolded protein binding	11	72	0.680485	0.852699	A0A8I6WMP9;A0A8I6WR25;A0A8I6XJF2;A0A8I6Y4H4;A0A8I6YT49;A0A8I7B995;F2CTS4;F2CU44;F2DB07;F2DGG1;F2DUR4
GO:0016791	phosphatase activity	8	53	0.683608	0.855109	A0A8I6Y3M9;A0A8I6YMC3;F2CR79;F2CX03;F2D8Z5;F2DGW2;F2DPN4;F2DQH1
GO:0050661	NADP binding	4	27	0.685417	0.855871	A0A3S9KBF3;A0A8I6XLS0;A0A8I7BAB0;F2CU23
GO:0035639	purine ribonucleoside triphosphate binding	74	461	0.687832	0.857385	A0A287EZV5;A0A287FP91;A0A287P008;A0A287Q7U2;A0A2P1AB13;A0A5C1YV39;A0A8I6WB19;A0A8I6WHD1;A0A8I6WQV8;A0A8I6X017;A0A8I6X472;A0A8I6X6B1;A0A8I6X6U8;A0A8I6XNJ0;A0A8I6XQR9;A0A8I6XUG0;A0A8I6XWQ1;A0A8I6XX88;A0A8I6Y2R8;A0A8I6Y4J8;A0A8I6YCQ1;A0A8I6YKV1;A0A8I6YQU0;A0A8I6YS17;A0A8I6YT49;A0A8I6Z0S4;A0A8I7B1F6;A0A8I7BAP0;A0A8I7BCY8;F2CQH9;F2CQV1;F2CTS4;F2CVA4;F2CW03;F2CWN4;F2D480;F2D484;F2D4P0;F2D5K0;F2D6M6;F2D…
GO:0000287	magnesium ion binding	7	47	0.69365	0.859751	A0A8I6XFM9;A0A8I6YMC3;A0A8I7B4C5;A0A8I7BBH0;A0A8I7BCM2;F2D119;F2DSZ9
GO:0008236	serine-type peptidase activity	7	47	0.69365	0.859751	A0A8I6XQV5;A0A8I6Y5Z0;A0A8I6Y6N4;A0A8I6YTI2;A0A8I7B6V7;F2DTJ0;F2E6T9
GO:0017171	serine hydrolase activity	7	47	0.69365	0.859751	A0A8I6XQV5;A0A8I6Y5Z0;A0A8I6Y6N4;A0A8I6YTI2;A0A8I7B6V7;F2DTJ0;F2E6T9
GO:0042578	phosphoric ester hydrolase activity	9	60	0.69535	0.859751	A0A8I6Y3M9;A0A8I6YMC3;F2CR79;F2CX03;F2D8Z5;F2DGW2;F2DPN4;F2DQH1;M0WQ79
GO:0008092	cytoskeletal protein binding	5	34	0.695759	0.859751	A0A8I6X6U8;A0A8I6YCQ1;A0A8I6YKQ7;A0A8I6YKV1;M0ZDF8
GO:0032553	ribonucleotide binding	77	481	0.701408	0.863326	A0A287EZV5;A0A287FP91;A0A287P008;A0A287Q7U2;A0A2P1AB13;A0A5C1YV39;A0A8I6WB19;A0A8I6WHD1;A0A8I6WQV8;A0A8I6X017;A0A8I6X472;A0A8I6X6B1;A0A8I6X6U8;A0A8I6XNJ0;A0A8I6XQR9;A0A8I6XUG0;A0A8I6XWQ1;A0A8I6XX88;A0A8I6Y2R8;A0A8I6Y4J8;A0A8I6YCQ1;A0A8I6YKV1;A0A8I6YQU0;A0A8I6YS17;A0A8I6YT49;A0A8I6Z0S4;A0A8I7B1F6;A0A8I7BAP0;A0A8I7BCY8;F2CQH9;F2CQV1;F2CQV7;F2CTS4;F2CVA4;F2CW03;F2CWN4;F2D480;F2D484;F2D4P0;F2D5K0;F2D…
GO:0016209	antioxidant activity	6	41	0.7058	0.863326	A0A8I6WHE5;A0A8I6XTB9;A0A8I6YHJ3;A0A8I6YXG5;F2CPL2;F2CQX6
GO:0016857	racemase and epimerase activity, acting on carbohydrates and derivatives	2	14	0.707085	0.863326	A0A287ILG2;A0A8I6YK25
GO:0033293	monocarboxylic acid binding	2	14	0.707085	0.863326	A0A8I6XTL4;F2DAR0
GO:0035251	UDP-glucosyltransferase activity	4	28	0.713817	0.863326	A0A287LTS8;A0A8I6XI70;C3W8L3;F2DQH1
GO:0046527	glucosyltransferase activity	4	28	0.713817	0.863326	A0A287LTS8;A0A8I6XI70;C3W8L3;F2DQH1
GO:0043168	anion binding	104	647	0.71475	0.863326	A0A287EZV5;A0A287FP91;A0A287NWK0;A0A287P008;A0A287Q7U2;A0A2P1AB13;A0A5C1YV39;A0A8I6WB19;A0A8I6WEH2;A0A8I6WGG3;A0A8I6WHD1;A0A8I6WQV8;A0A8I6WRJ2;A0A8I6X017;A0A8I6X0Z2;A0A8I6X472;A0A8I6X6B1;A0A8I6X6U8;A0A8I6XCQ2;A0A8I6XLS0;A0A8I6XMW6;A0A8I6XNJ0;A0A8I6XQR9;A0A8I6XTL4;A0A8I6XUG0;A0A8I6XUQ8;A0A8I6XWQ1;A0A8I6XX88;A0A8I6Y2R8;A0A8I6Y4J8;A0A8I6YCQ1;A0A8I6YFL0;A0A8I6YKV1;A0A8I6YQI6;A0A8I6YQU0;A0A8I6YS17;A0A…
GO:0000774	adenyl-nucleotide exchange factor activity	1	7	0.722954	0.863326	A0A8I7B659
GO:0000981	RNA polymerase II transcription factor activity, sequence-specific DNA binding	1	7	0.722954	0.863326	A0A8I6XLR3
GO:0003993	acid phosphatase activity	1	7	0.722954	0.863326	F2CX03
GO:0004312	fatty acid synthase activity	1	7	0.722954	0.863326	F2DMT1
GO:0004550	nucleoside diphosphate kinase activity	1	7	0.722954	0.863326	A0A8I6WHD1
GO:0004634	phosphopyruvate hydratase activity	1	7	0.722954	0.863326	A0A8I7BCM2
GO:0008443	phosphofructokinase activity	1	7	0.722954	0.863326	A0A8I7B1F6
GO:0015662	ATPase activity, coupled to transmembrane movement of ions, phosphorylative mechanism	1	7	0.722954	0.863326	A0A8I6XQR9
GO:0015932	nucleobase-containing compound transmembrane transporter activity	1	7	0.722954	0.863326	F2DG80
GO:0016157	sucrose synthase activity	1	7	0.722954	0.863326	A0A8I6XI70
GO:0030976	thiamine pyrophosphate binding	1	7	0.722954	0.863326	A0A8I6WGG3
GO:0042562	hormone binding	1	7	0.722954	0.863326	F2DAR0
GO:0043167	ion binding	174	1071	0.723011	0.863326	A0A287EZV5;A0A287FP91;A0A287NWK0;A0A287P008;A0A287PY01;A0A287Q7U2;A0A287WH27;A0A2P1AB13;A0A5C1YV39;A0A8I6WB19;A0A8I6WDS1;A0A8I6WEH2;A0A8I6WGG3;A0A8I6WHD1;A0A8I6WMI1;A0A8I6WQV8;A0A8I6WRJ2;A0A8I6WT04;A0A8I6WT13;A0A8I6WTI3;A0A8I6WWC5;A0A8I6WZA5;A0A8I6X017;A0A8I6X0Z2;A0A8I6X472;A0A8I6X660;A0A8I6X6B1;A0A8I6X6J9;A0A8I6X6U8;A0A8I6X899;A0A8I6XCQ2;A0A8I6XDB4;A0A8I6XDR0;A0A8I6XF02;A0A8I6XFM0;A0A8I6XFM9;A0A…
GO:0043169	cation binding	87	545	0.724079	0.863326	A0A287PY01;A0A287WH27;A0A5C1YV39;A0A8I6WDS1;A0A8I6WGG3;A0A8I6WMI1;A0A8I6WRJ2;A0A8I6WT04;A0A8I6WT13;A0A8I6WTI3;A0A8I6WWC5;A0A8I6WZA5;A0A8I6X660;A0A8I6X6B1;A0A8I6X6J9;A0A8I6X899;A0A8I6XDB4;A0A8I6XDR0;A0A8I6XF02;A0A8I6XFM0;A0A8I6XFM9;A0A8I6XGX1;A0A8I6XQ26;A0A8I6XRV2;A0A8I6XSD2;A0A8I6Y3H7;A0A8I6Y4H4;A0A8I6Y4Z6;A0A8I6YB85;A0A8I6YF06;A0A8I6YHJ3;A0A8I6YHZ7;A0A8I6YKQ7;A0A8I6YMC3;A0A8I6YQU0;A0A8I6YS17;A0A…
GO:0016887	ATPase activity	17	113	0.726884	0.865223	A0A8I6WDR3;A0A8I6X6Y8;A0A8I6XE20;A0A8I6XNJ0;A0A8I6XQR9;A0A8I6YT49;A0A8I7B5T8;F2CRK6;F2CWN4;F2CWQ6;F2D5K0;F2D8X9;F2DC74;F2DJJ2;F2DUR4;F2E6T9;F2EF80
GO:0005484	SNAP receptor activity	3	22	0.738651	0.875962	A0A8I6X8X0;F2DRI5;F2E298
GO:0004601	peroxidase activity	4	29	0.740294	0.875962	A0A8I6XTB9;A0A8I6YHJ3;A0A8I6YXG5;F2CPL2
GO:0032559	adenyl ribonucleotide binding	58	370	0.74313	0.875962	A0A287EZV5;A0A287FP91;A0A287P008;A0A2P1AB13;A0A5C1YV39;A0A8I6WHD1;A0A8I6WQV8;A0A8I6X017;A0A8I6X472;A0A8I6X6B1;A0A8I6XNJ0;A0A8I6XQR9;A0A8I6XX88;A0A8I6Y2R8;A0A8I6Y4J8;A0A8I6YCQ1;A0A8I6YS17;A0A8I6YT49;A0A8I6Z0S4;A0A8I7B1F6;A0A8I7BAP0;F2CQH9;F2CQV1;F2CTS4;F2CVA4;F2CW03;F2D480;F2D484;F2D4P0;F2D5K0;F2D6M6;F2D8X9;F2DB07;F2DC74;F2DEG9;F2DHP2;F2DJJ2;F2DML2;F2DNE7;F2DPU4;F2DR63;F2DS97;F2DSZ9;F2DUR4;F2DZN2;…
GO:0004197	cysteine-type endopeptidase activity	2	15	0.743408	0.875962	B4ESE6;F2DDC9
GO:0004540	ribonuclease activity	2	15	0.743408	0.875962	A0A8I7BCT1;F2CVL6
GO:0008171	O-methyltransferase activity	2	15	0.743408	0.875962	A0A8I6WB26;A0A8I6WNS5
GO:0008238	exopeptidase activity	5	36	0.744506	0.875962	A0A8I6XSD2;A0A8I6Y6N4;A0A8I6YSG5;A0A8I6YTI2;F2DNP2
GO:0016787	hydrolase activity	107	670	0.745928	0.876189	A0A287Q7U2;A0A287SCX5;A0A8I6W6F0;A0A8I6WB19;A0A8I6WD99;A0A8I6WDR3;A0A8I6WH69;A0A8I6WS80;A0A8I6WT04;A0A8I6WT13;A0A8I6WT14;A0A8I6WVW5;A0A8I6WXY7;A0A8I6X6U8;A0A8I6X6Y8;A0A8I6X899;A0A8I6X926;A0A8I6XA88;A0A8I6XD03;A0A8I6XE20;A0A8I6XH57;A0A8I6XNJ0;A0A8I6XPG4;A0A8I6XQ26;A0A8I6XQR9;A0A8I6XQV5;A0A8I6XQX4;A0A8I6XSD2;A0A8I6XUG0;A0A8I6XUU4;A0A8I6Y2R8;A0A8I6Y3M9;A0A8I6Y5W5;A0A8I6Y5Z0;A0A8I6Y6M4;A0A8I6Y6N4;A0A…
GO:0030554	adenyl nucleotide binding	59	377	0.749722	0.877931	A0A287EZV5;A0A287FP91;A0A287P008;A0A2P1AB13;A0A5C1YV39;A0A8I6WHD1;A0A8I6WQV8;A0A8I6X017;A0A8I6X472;A0A8I6X6B1;A0A8I6XNJ0;A0A8I6XQR9;A0A8I6XX88;A0A8I6Y2R8;A0A8I6Y4J8;A0A8I6YCQ1;A0A8I6YS17;A0A8I6YT49;A0A8I6Z0S4;A0A8I7B1F6;A0A8I7B659;A0A8I7BAP0;F2CQH9;F2CQV1;F2CTS4;F2CVA4;F2CW03;F2D480;F2D484;F2D4P0;F2D5K0;F2D6M6;F2D8X9;F2DB07;F2DC74;F2DEG9;F2DHP2;F2DJJ2;F2DML2;F2DNE7;F2DPU4;F2DR63;F2DS97;F2DSZ9;F2D…
GO:0008194	UDP-glycosyltransferase activity	6	43	0.749873	0.877931	A0A287LTS8;A0A8I6XI70;A0A8I6Y4F0;A0A8I6YM51;C3W8L3;F2DQH1
GO:0005543	phospholipid binding	4	30	0.764875	0.882004	A0A287NWK0;A0A8I6X0Z2;F2CWC9;F2DGM5
GO:0005504	fatty acid binding	1	8	0.769434	0.882004	A0A8I6XTL4
GO:0015605	organophosphate ester transmembrane transporter activity	1	8	0.769434	0.882004	F2DG80
GO:0015925	galactosidase activity	1	8	0.769434	0.882004	A0A8I6XUU4
GO:0016160	amylase activity	1	8	0.769434	0.882004	F2EFV1
GO:0016624	oxidoreductase activity, acting on the aldehyde or oxo group of donors, disulfide as acceptor	1	8	0.769434	0.882004	A0A8I6WGG3
GO:0016638	oxidoreductase activity, acting on the CH-NH2 group of donors	1	8	0.769434	0.882004	F2E0P9
GO:0016774	phosphotransferase activity, carboxyl group as acceptor	1	8	0.769434	0.882004	F2CQV1
GO:0016801	hydrolase activity, acting on ether bonds	1	8	0.769434	0.882004	A0A8I6YMC3
GO:0016884	carbon-nitrogen ligase activity, with glutamine as amido-N-donor	1	8	0.769434	0.882004	A0A8I6X6B1
GO:0030674	protein binding, bridging	1	8	0.769434	0.882004	A0A8I6YC75
GO:0046873	metal ion transmembrane transporter activity	1	8	0.769434	0.882004	F2CWF3
GO:1901505	carbohydrate derivative transporter activity	1	8	0.769434	0.882004	F2DG80
GO:0046872	metal ion binding	84	534	0.7735	0.883625	A0A287PY01;A0A287WH27;A0A5C1YV39;A0A8I6WDS1;A0A8I6WMI1;A0A8I6WRJ2;A0A8I6WT04;A0A8I6WT13;A0A8I6WTI3;A0A8I6WWC5;A0A8I6WZA5;A0A8I6X660;A0A8I6X6B1;A0A8I6X6J9;A0A8I6X899;A0A8I6XDB4;A0A8I6XDR0;A0A8I6XF02;A0A8I6XFM0;A0A8I6XFM9;A0A8I6XGX1;A0A8I6XQ26;A0A8I6XRV2;A0A8I6XSD2;A0A8I6Y3H7;A0A8I6Y4H4;A0A8I6Y4Z6;A0A8I6YB85;A0A8I6YF06;A0A8I6YHJ3;A0A8I6YHZ7;A0A8I6YKQ7;A0A8I6YMC3;A0A8I6YQU0;A0A8I6YS17;A0A8I6YSG5;A0A…
GO:0020037	heme binding	7	51	0.774341	0.883625	A0A287PY01;A0A8I6YHJ3;A0A8I6YXG5;F2CPL2;F2CVB4;F2DZK7;W8E7E3
GO:0005524	ATP binding	57	368	0.775128	0.883625	A0A287EZV5;A0A287FP91;A0A287P008;A0A2P1AB13;A0A5C1YV39;A0A8I6WHD1;A0A8I6WQV8;A0A8I6X017;A0A8I6X472;A0A8I6X6B1;A0A8I6XNJ0;A0A8I6XQR9;A0A8I6XX88;A0A8I6Y2R8;A0A8I6Y4J8;A0A8I6YCQ1;A0A8I6YS17;A0A8I6YT49;A0A8I6Z0S4;A0A8I7B1F6;A0A8I7BAP0;F2CQH9;F2CQV1;F2CTS4;F2CVA4;F2CW03;F2D480;F2D484;F2D4P0;F2D5K0;F2D6M6;F2D8X9;F2DB07;F2DC74;F2DEG9;F2DHP2;F2DJJ2;F2DML2;F2DNE7;F2DPU4;F2DR63;F2DS97;F2DSZ9;F2DUR4;F2DZN2;…
GO:0016763	transferase activity, transferring pentosyl groups	2	16	0.775805	0.883625	A0A8I6XFM9;F2ELJ9
GO:0016788	hydrolase activity, acting on ester bonds	18	124	0.785511	0.893253	A0A8I6WS80;A0A8I6WT14;A0A8I6XQ26;A0A8I6Y3M9;A0A8I6YMC3;A0A8I7BCT1;F2CR79;F2CVL6;F2CX03;F2CYU9;F2D8Z5;F2DGW2;F2DMT1;F2DPN4;F2DQH1;F2ELP4;M0V6E2;M0WQ79
GO:0051213	dioxygenase activity	4	31	0.787606	0.893545	A0A8I6WRJ2;A0A8I6WZA5;F2CSE2;Q673G6
GO:0043621	protein self-association	3	24	0.79188	0.893545	A0A8I6XJF2;A0A8I7B995;F2CU44
GO:0097367	carbohydrate derivative binding	77	494	0.792439	0.893545	A0A287EZV5;A0A287FP91;A0A287P008;A0A287Q7U2;A0A2P1AB13;A0A5C1YV39;A0A8I6WB19;A0A8I6WHD1;A0A8I6WQV8;A0A8I6X017;A0A8I6X472;A0A8I6X6B1;A0A8I6X6U8;A0A8I6XNJ0;A0A8I6XQR9;A0A8I6XUG0;A0A8I6XWQ1;A0A8I6XX88;A0A8I6Y2R8;A0A8I6Y4J8;A0A8I6YCQ1;A0A8I6YKV1;A0A8I6YQU0;A0A8I6YS17;A0A8I6YT49;A0A8I6Z0S4;A0A8I7B1F6;A0A8I7BAP0;A0A8I7BCY8;F2CQH9;F2CQV1;F2CQV7;F2CTS4;F2CVA4;F2CW03;F2CWN4;F2D480;F2D484;F2D4P0;F2D5K0;F2D…
GO:0070011	peptidase activity, acting on L-amino acid peptides	20	138	0.797755	0.893545	A0A8I6WT04;A0A8I6WT13;A0A8I6XQV5;A0A8I6XSD2;A0A8I6Y5W5;A0A8I6Y5Z0;A0A8I6Y6N4;A0A8I6YSG5;A0A8I6YTI2;A0A8I6YUS4;A0A8I7B2U1;A0A8I7B6V7;B4ESE6;F2CQA9;F2DC93;F2DDC9;F2DNP2;F2DNP6;F2DTJ0;F2E6T9
GO:0016757	transferase activity, transferring glycosyl groups	10	73	0.803645	0.893545	A0A287LTS8;A0A8I6XFM9;A0A8I6XI70;A0A8I6XRV2;A0A8I6Y4F0;A0A8I6YM51;A0A8I7BFU9;C3W8L3;F2DQH1;F2ELJ9
GO:0000049	tRNA binding	2	17	0.80457	0.893545	A0A8I6X472;F2E941
GO:0001071	nucleic acid binding transcription factor activity	2	17	0.80457	0.893545	A0A8I6XLR3;A1XXI9
GO:0003700	transcription factor activity, sequence-specific DNA binding	2	17	0.80457	0.893545	A0A8I6XLR3;A1XXI9
GO:0003779	actin binding	2	17	0.80457	0.893545	A0A8I6YKQ7;M0ZDF8
GO:0042802	identical protein binding	2	17	0.80457	0.893545	A0A8I6XCP7;F2EFV3
GO:0008865	fructokinase activity	1	9	0.80813	0.893545	F2CW03
GO:0016832	aldehyde-lyase activity	1	9	0.80813	0.893545	A0A8I6XBW8
GO:0017069	snRNA binding	1	9	0.80813	0.893545	F2DE93
GO:0042803	protein homodimerization activity	1	9	0.80813	0.893545	A0A8I6XCP7
GO:0070566	adenylyltransferase activity	1	9	0.80813	0.893545	A0A2P1AB13
GO:0070628	proteasome binding	1	9	0.80813	0.893545	F2DUJ6
GO:1901677	phosphate transmembrane transporter activity	1	9	0.80813	0.893545	F2DG80
GO:0046906	tetrapyrrole binding	7	53	0.808326	0.893545	A0A287PY01;A0A8I6YHJ3;A0A8I6YXG5;F2CPL2;F2CVB4;F2DZK7;W8E7E3
GO:0005509	calcium ion binding	9	67	0.813879	0.898057	A0A8I6XDR0;A0A8I6Y3H7;A0A8I6Y4H4;F2CT56;F2CTS1;F2CUH2;F2DGG1;M0XGU8;M0XN08
GO:0016877	ligase activity, forming carbon-sulfur bonds	3	25	0.814927	0.898057	A0A8I6YHZ7;A0A8I7BF02;F2DHP2
GO:0016836	hydro-lyase activity	5	40	0.824233	0.906817	A0A8I6WWJ7;A0A8I6XRG5;A0A8I6YHI9;A0A8I7BCM2;F2D1C6
GO:0008233	peptidase activity	20	141	0.827981	0.906817	A0A8I6WT04;A0A8I6WT13;A0A8I6XQV5;A0A8I6XSD2;A0A8I6Y5W5;A0A8I6Y5Z0;A0A8I6Y6N4;A0A8I6YSG5;A0A8I6YTI2;A0A8I6YUS4;A0A8I7B2U1;A0A8I7B6V7;B4ESE6;F2CQA9;F2DC93;F2DDC9;F2DNP2;F2DNP6;F2DTJ0;F2E6T9
GO:0004518	nuclease activity	2	18	0.830009	0.906817	A0A8I7BCT1;F2CVL6
GO:0010181	FMN binding	2	18	0.830009	0.906817	F2CQV7;F2DHZ5
GO:0035091	phosphatidylinositol binding	2	18	0.830009	0.906817	A0A287NWK0;A0A8I6X0Z2
GO:0004396	hexokinase activity	1	10	0.840343	0.906817	F2CW03
GO:0004519	endonuclease activity	1	10	0.840343	0.906817	F2CVL6
GO:0004521	endoribonuclease activity	1	10	0.840343	0.906817	F2CVL6
GO:0005516	calmodulin binding	1	10	0.840343	0.906817	M0XGU8
GO:0016597	amino acid binding	1	10	0.840343	0.906817	A0A8I6XMW6
GO:0030544	Hsp70 protein binding	1	10	0.840343	0.906817	A0A8I6YD95
GO:0036002	pre-mRNA binding	1	10	0.840343	0.906817	F2D205
GO:0036402	proteasome-activating ATPase activity	1	10	0.840343	0.906817	F2DC74
GO:0030170	pyridoxal phosphate binding	5	41	0.840682	0.906817	A0A8I6YQI6;F2D643;F2DYM4;F2E7W3;F2EDT9
GO:0004190	aspartic-type endopeptidase activity	2	19	0.852427	0.913956	A0A8I6Y5W5;F2CQA9
GO:0015291	secondary active transmembrane transporter activity	2	19	0.852427	0.913956	F2DG80;Q4A1H2
GO:0043022	ribosome binding	2	19	0.852427	0.913956	A0A8I6XEF6;F2DAU4
GO:0070001	aspartic-type peptidase activity	2	19	0.852427	0.913956	A0A8I6Y5W5;F2CQA9
GO:0019787	ubiquitin-like protein transferase activity	4	35	0.861448	0.922241	A0A8I6X7M2;F2CQH9;F2DQR8;F2E3I5
GO:0016758	transferase activity, transferring hexosyl groups	6	50	0.866179	0.92281	A0A287LTS8;A0A8I6XI70;A0A8I6XRV2;A0A8I7BFU9;C3W8L3;F2DQH1
GO:0019203	carbohydrate phosphatase activity	1	11	0.867157	0.92281	F2DQH1
GO:0031625	ubiquitin protein ligase binding	1	11	0.867157	0.92281	A0A8I6YNI8
GO:0061631	ubiquitin conjugating enzyme activity	1	11	0.867157	0.92281	F2CQH9
GO:0016830	carbon-carbon lyase activity	5	43	0.86979	0.923955	A0A8I6XBW8;A0A8I6XFM0;A0A8I6YQU0;F2DEG9;F2DYM4
GO:0052689	carboxylic ester hydrolase activity	3	28	0.87146	0.923955	A0A8I6WS80;A0A8I6WT14;F2ELP4
GO:0008514	organic anion transmembrane transporter activity	2	20	0.87212	0.923955	A0A8I6Y690;F2DG80
GO:0004185	serine-type carboxypeptidase activity	1	12	0.889475	0.938159	A0A8I6YTI2
GO:0016615	malate dehydrogenase activity	1	12	0.889475	0.938159	F2ELT5
GO:0060090	binding, bridging	1	12	0.889475	0.938159	A0A8I6YC75
GO:0004842	ubiquitin-protein transferase activity	3	30	0.900119	0.947984	A0A8I6X7M2;F2CQH9;F2DQR8
GO:0019200	carbohydrate kinase activity	2	22	0.904443	0.949325	A0A8I7B1F6;F2CW03
GO:0016835	carbon-oxygen lyase activity	5	46	0.904963	0.949325	A0A8I6WWJ7;A0A8I6XRG5;A0A8I6YHI9;A0A8I7BCM2;F2D1C6
GO:0005342	organic acid transmembrane transporter activity	1	13	0.90805	0.949325	A0A8I6Y690
GO:0046943	carboxylic acid transmembrane transporter activity	1	13	0.90805	0.949325	A0A8I6Y690
GO:0051015	actin filament binding	1	13	0.90805	0.949325	A0A8I6YKQ7
GO:0005372	water transmembrane transporter activity	1	14	0.923509	0.961258	A0A8I6WG88
GO:0005507	copper ion binding	1	14	0.923509	0.961258	A0A8I6WWC5
GO:0015250	water channel activity	1	14	0.923509	0.961258	A0A8I6WG88
GO:0004180	carboxypeptidase activity	1	15	0.936374	0.970399	A0A8I6YTI2
GO:0005487	nucleocytoplasmic transporter activity	1	15	0.936374	0.970399	A0A8I6WIT4
GO:0070008	serine-type exopeptidase activity	1	15	0.936374	0.970399	A0A8I6YTI2
GO:0016853	isomerase activity	11	96	0.945024	0.973464	A0A0U2GJJ3;A0A0U2GJL1;A0A287ILG2;A0A8I6XBL5;A0A8I6XPB3;A0A8I6YK25;A0A8I6YSL3;A0A8I7B4F1;F2D1C6;F2DDD5;F2DVI8
GO:0016651	oxidoreductase activity, acting on NAD(P)H	4	43	0.945693	0.973464	A0A8I6WEH2;A0A8I6XLS0;F2CQX6;F2E5P4
GO:0033218	amide binding	4	43	0.945693	0.973464	A0A8I6XNN7;F2CWC9;F2CWN4;F2DGM5
GO:0015297	antiporter activity	1	16	0.947078	0.973464	F2DG80
GO:0051539	4 iron, 4 sulfur cluster binding	1	16	0.947078	0.973464	F2D5L4
GO:0005048	signal sequence binding	2	26	0.947524	0.973464	A0A8I6XNN7;F2CWN4
GO:0016741	transferase activity, transferring one-carbon groups	4	46	0.962653	0.986926	A0A8I6WB26;A0A8I6WNS5;A0A8I6XD03;F2DZ70
GO:0016655	oxidoreductase activity, acting on NAD(P)H, quinone or similar compound as acceptor	1	18	0.963395	0.986926	A0A8I6XLS0
GO:0008168	methyltransferase activity	3	38	0.965692	0.98786	A0A8I6WB26;A0A8I6WNS5;F2DZ70
GO:0016829	lyase activity	12	110	0.969593	0.990429	A0A287SCX5;A0A8I6WWJ7;A0A8I6XBW8;A0A8I6XFM0;A0A8I6XRG5;A0A8I6YHI9;A0A8I6YQU0;A0A8I7BCM2;F2CWG0;F2D1C6;F2DEG9;F2DYM4
GO:0051536	iron-sulfur cluster binding	3	41	0.977477	0.993257	A0A8I6YB85;F2CW22;F2D5L4
GO:0051540	metal cluster binding	3	41	0.977477	0.993257	A0A8I6YB85;F2CW22;F2D5L4
GO:0016740	transferase activity	57	422	0.978892	0.993257	A0A287EZV5;A0A287FP91;A0A287LTS8;A0A287P008;A0A2P1AB13;A0A8I6WB26;A0A8I6WHD1;A0A8I6WNS5;A0A8I6WXW1;A0A8I6X017;A0A8I6X472;A0A8I6X7M2;A0A8I6XCP7;A0A8I6XD03;A0A8I6XFM9;A0A8I6XI70;A0A8I6XIK9;A0A8I6XRV2;A0A8I6Y1V9;A0A8I6Y4F0;A0A8I6YFN2;A0A8I6YM51;A0A8I6YQI6;A0A8I6Z0S4;A0A8I7B1F6;A0A8I7BFU9;C3W8L3;F2CPX3;F2CQH9;F2CQV1;F2CVA4;F2CW03;F2CW53;F2D119;F2D480;F2D643;F2DML2;F2DMT1;F2DQH1;F2DQR8;F2DS97;F2DZ70;F…
GO:0051537	2 iron, 2 sulfur cluster binding	1	21	0.978954	0.993257	F2CW22
GO:0043021	ribonucleoprotein complex binding	2	32	0.979326	0.993257	A0A8I6XEF6;F2DAU4
GO:0003824	catalytic activity	267	1715	0.981442	0.993501	A0A0U2GJJ3;A0A0U2GJL1;A0A287EZV5;A0A287FP91;A0A287GYL8;A0A287ILG2;A0A287LTS8;A0A287P008;A0A287Q7U2;A0A287SCX5;A0A2P1AB13;A0A3S9KBF3;A0A5C1YV39;A0A8I6W6F0;A0A8I6W9A2;A0A8I6WB19;A0A8I6WB26;A0A8I6WD99;A0A8I6WDR3;A0A8I6WEH2;A0A8I6WGG3;A0A8I6WH69;A0A8I6WHD1;A0A8I6WHE5;A0A8I6WKM0;A0A8I6WNS5;A0A8I6WPS5;A0A8I6WQV8;A0A8I6WRJ2;A0A8I6WS80;A0A8I6WT04;A0A8I6WT13;A0A8I6WT14;A0A8I6WTI3;A0A8I6WVW5;A0A8I6WWJ7;A0A…
GO:0008757	S-adenosylmethionine-dependent methyltransferase activity	2	33	0.982353	0.993501	A0A8I6WB26;A0A8I6WNS5
GO:1901681	sulfur compound binding	1	24	0.987908	0.997703	A0A8I6WGG3
GO:0008565	protein transporter activity	1	27	0.993057	0.99941	A0A8I6WIT4
GO:0004364	glutathione transferase activity	1	28	0.99423	0.99941	A0A8I6Y1V9
GO:0042277	peptide binding	2	40	0.994287	0.99941	A0A8I6XNN7;F2CWN4
GO:0016831	carboxy-lyase activity	1	29	0.995205	0.99941	F2DEG9
GO:0016860	intramolecular oxidoreductase activity	1	32	0.99725	1	F2D1C6
GO:0016765	transferase activity, transferring alkyl or aryl (other than methyl) groups	1	42	0.999571	1	A0A8I6Y1V9
GO:0003674	molecular_function	481	2874	1	1	A0A0U2GJJ3;A0A0U2GJL1;A0A287DTW3;A0A287EZS0;A0A287EZV5;A0A287FP91;A0A287FZ34;A0A287GYL8;A0A287ILG2;A0A287JEP8;A0A287LTS8;A0A287NWK0;A0A287P008;A0A287PY01;A0A287Q7U2;A0A287SCX5;A0A287U5M5;A0A287WH27;A0A2P1AB13;A0A3S9KBF3;A0A5C1YV39;A0A8I6W6F0;A0A8I6W9A2;A0A8I6WB19;A0A8I6WB26;A0A8I6WC09;A0A8I6WD99;A0A8I6WDR3;A0A8I6WDS1;A0A8I6WDV9;A0A8I6WEH2;A0A8I6WF91;A0A8I6WFJ6;A0A8I6WG88;A0A8I6WGG3;A0A8I6WH69;A0A…

## Sheet: BP
GO ID	Description	out (420)	All (2571)	pvalue	p.adjust	Genes
GO:0065004	protein-DNA complex assembly	8	16	0.00181314	0.777761	A0A287U5M5;A0A8I6WV37;A0A8I6XEM6;A0A8I6YL06;A0A8I6YZG5;F2CUP3;F2ECG8;F2EHE1
GO:0071824	protein-DNA complex subunit organization	8	16	0.00181314	0.777761	A0A287U5M5;A0A8I6WV37;A0A8I6XEM6;A0A8I6YL06;A0A8I6YZG5;F2CUP3;F2ECG8;F2EHE1
GO:0009448	gamma-aminobutyric acid metabolic process	3	3	0.00433351	0.777761	A0A8I6YQI6;A0A8I6Z0L1;F2EDT9
GO:0006334	nucleosome assembly	6	12	0.00702755	0.777761	A0A287U5M5;A0A8I6WV37;A0A8I6YL06;A0A8I6YZG5;F2CUP3;F2EHE1
GO:0032543	mitochondrial translation	6	12	0.00702755	0.777761	A0A8I6WQV8;A0A8I6XUG0;F2CVM4;F2DXB7;F2EFV3;F2EIG1
GO:0034728	nucleosome organization	6	12	0.00702755	0.777761	A0A287U5M5;A0A8I6WV37;A0A8I6YL06;A0A8I6YZG5;F2CUP3;F2EHE1
GO:0006333	chromatin assembly or disassembly	6	13	0.0112811	0.777761	A0A287U5M5;A0A8I6WV37;A0A8I6YL06;A0A8I6YZG5;F2CUP3;F2EHE1
GO:0031497	chromatin assembly	6	13	0.0112811	0.777761	A0A287U5M5;A0A8I6WV37;A0A8I6YL06;A0A8I6YZG5;F2CUP3;F2EHE1
GO:0009095	aromatic amino acid family biosynthetic process, prephenate pathway	3	4	0.015223	0.777761	A0A8I6YFL0;A0A8I6YHI9;A0A8I7BJR0
GO:0006323	DNA packaging	6	14	0.0170744	0.777761	A0A287U5M5;A0A8I6WV37;A0A8I6YL06;A0A8I6YZG5;F2CUP3;F2EHE1
GO:0018193	peptidyl-amino acid modification	5	11	0.0223275	0.777761	A0A8I6XH22;A0A8I6XRV2;A0A8I7BF02;A0A8I7BII2;F2CW55
GO:0006571	tyrosine biosynthetic process	2	2	0.0266335	0.777761	A0A8I6YFL0;A0A8I7BJR0
GO:0006768	biotin metabolic process	2	2	0.0266335	0.777761	A0A8I6YQI6;F2EDT9
GO:0009102	biotin biosynthetic process	2	2	0.0266335	0.777761	A0A8I6YQI6;F2EDT9
GO:0019722	calcium-mediated signaling	2	2	0.0266335	0.777761	F2CT56;F2CTS1
GO:0035627	ceramide transport	2	2	0.0266335	0.777761	F2CWC9;F2DGM5
GO:0042886	amide transport	2	2	0.0266335	0.777761	F2CWC9;F2DGM5
GO:0070370	cellular heat acclimation	2	2	0.0266335	0.777761	F2DAW4;F2EFK9
GO:0006121	mitochondrial electron transport, succinate to ubiquinone	3	5	0.033464	0.777761	A0A8I6WTI3;F2CT87;F2EL27
GO:0007165	signal transduction	23	97	0.0355791	0.777761	A0A287EZV5;A0A287FP91;A0A287FZ34;A0A8I6WXW1;A0A8I6X017;A0A8I6XCP7;A0A8I6Y5Z0;A0A8I6YIV5;A0A8I6Z0S4;A0A8I6Z4M3;A0A8I7B2K7;A1X810;A1XXI9;F2CRG7;F2CT56;F2CTS1;F2D7S9;F2DAR0;F2DC93;F2DS97;F2DZN2;M0V3S6;M0XGU8
GO:0007154	cell communication	26	113	0.0375225	0.777761	A0A287EZV5;A0A287FP91;A0A287FZ34;A0A8I6WXW1;A0A8I6X017;A0A8I6XBD2;A0A8I6XCP7;A0A8I6Y5Z0;A0A8I6YIV5;A0A8I6Z0S4;A0A8I6Z4M3;A0A8I7B2K7;A1X810;A1XXI9;F2CRG7;F2CT56;F2CTS1;F2D7S9;F2DAR0;F2DC93;F2DS97;F2DZN2;F2E0P9;F2E3X1;M0V3S6;M0XGU8
GO:0044700	single organism signaling	23	99	0.0440719	0.777761	A0A287EZV5;A0A287FP91;A0A287FZ34;A0A8I6WXW1;A0A8I6X017;A0A8I6XCP7;A0A8I6Y5Z0;A0A8I6YIV5;A0A8I6Z0S4;A0A8I6Z4M3;A0A8I7B2K7;A1X810;A1XXI9;F2CRG7;F2CT56;F2CTS1;F2D7S9;F2DAR0;F2DC93;F2DS97;F2DZN2;M0V3S6;M0XGU8
GO:0044267	cellular protein metabolic process	80	415	0.0466317	0.777761	A0A287NWK0;A0A8I6WB19;A0A8I6WKG3;A0A8I6WQV8;A0A8I6WT04;A0A8I6X0M9;A0A8I6X7M2;A0A8I6X7Q6;A0A8I6XEF6;A0A8I6XEP7;A0A8I6XH22;A0A8I6XH57;A0A8I6XJN9;A0A8I6XRV2;A0A8I6XUG0;A0A8I6XWQ1;A0A8I6Y0T7;A0A8I6Y2P0;A0A8I6Y4Z6;A0A8I6YHZ7;A0A8I6YIV5;A0A8I6YNI8;A0A8I6YUS4;A0A8I6YVL6;A0A8I6Z9Z3;A0A8I7B654;A0A8I7B6R2;A0A8I7BE86;A0A8I7BF02;A0A8I7BII2;A0MMD3;B4ESE6;F2CQ03;F2CQH9;F2CRW7;F2CS15;F2CS23;F2CSX2;F2CT73;F2CVM4…
GO:0023052	signaling	23	100	0.0488363	0.777761	A0A287EZV5;A0A287FP91;A0A287FZ34;A0A8I6WXW1;A0A8I6X017;A0A8I6XCP7;A0A8I6Y5Z0;A0A8I6YIV5;A0A8I6Z0S4;A0A8I6Z4M3;A0A8I7B2K7;A1X810;A1XXI9;F2CRG7;F2CT56;F2CTS1;F2D7S9;F2DAR0;F2DC93;F2DS97;F2DZN2;M0V3S6;M0XGU8
GO:0043604	amide biosynthetic process	45	219	0.0505612	0.777761	A0A8I6WB19;A0A8I6WQV8;A0A8I6XEF6;A0A8I6XUG0;A0A8I6XWQ1;A0A8I6YQI6;A0A8I6Z9Z3;A0A8I7BE86;F2CQ03;F2CRW7;F2CS15;F2CS23;F2CSX2;F2CT73;F2CVM4;F2CZ65;F2CZL7;F2D1K5;F2D293;F2D2Y2;F2D483;F2D4K2;F2D558;F2D6M6;F2D702;F2D788;F2DAK3;F2DFA6;F2DHN5;F2DIR3;F2DR63;F2DXB7;F2DXD4;F2DYM4;F2E556;F2E5S3;F2E941;F2ECK7;F2EDT9;F2EFR1;F2EFV3;F2EG94;F2EIG1;M0XNG3;Q9XHS0
GO:0006325	chromatin organization	7	22	0.05439	0.777761	A0A287U5M5;A0A8I6WV37;A0A8I6YL06;A0A8I6YZG5;F2CUP3;F2EHE1;M0Y7Q2
GO:0042775	mitochondrial ATP synthesis coupled electron transport	7	22	0.05439	0.777761	A0A8I6WTI3;A0A8I6YH05;F2CT87;F2D7B2;F2DMM2;F2E2B0;F2EL27
GO:0000154	rRNA modification	3	6	0.0589252	0.777761	A0A8I6X472;F2CQY5;F2DDD5
GO:0018196	peptidyl-asparagine modification	3	6	0.0589252	0.777761	A0A8I6XH22;A0A8I6XRV2;A0A8I7BII2
GO:0018279	protein N-linked glycosylation via asparagine	3	6	0.0589252	0.777761	A0A8I6XH22;A0A8I6XRV2;A0A8I7BII2
GO:0035556	intracellular signal transduction	9	32	0.0644391	0.777761	A0A287EZV5;A0A287FP91;A0A287FZ34;A0A8I6WXW1;A0A8I6YIV5;A0A8I7B2K7;F2DC93;F2DS97;M0XGU8
GO:0019538	protein metabolic process	95	509	0.0657114	0.777761	A0A287NWK0;A0A8I6WB19;A0A8I6WKG3;A0A8I6WQV8;A0A8I6WT04;A0A8I6WT13;A0A8I6X0M9;A0A8I6X7M2;A0A8I6X7Q6;A0A8I6XEF6;A0A8I6XEP7;A0A8I6XH22;A0A8I6XH57;A0A8I6XJN9;A0A8I6XQV5;A0A8I6XRV2;A0A8I6XSD2;A0A8I6XUG0;A0A8I6XWQ1;A0A8I6Y0T7;A0A8I6Y2P0;A0A8I6Y4Z6;A0A8I6Y5W5;A0A8I6Y6N4;A0A8I6YHZ7;A0A8I6YIV5;A0A8I6YNI8;A0A8I6YTI2;A0A8I6YUS4;A0A8I6YVL6;A0A8I6Z9Z3;A0A8I7B2U1;A0A8I7B654;A0A8I7B6R2;A0A8I7B6V7;A0A8I7BE86;A0A…
GO:0042274	ribosomal small subunit biogenesis	7	23	0.0676397	0.777761	A0A8I6X472;F2CS23;F2D483;F2D702;F2DFA6;F2E556;F2EG94
GO:0000075	cell cycle checkpoint	2	3	0.0712334	0.777761	A0A8I6WDS1;A0A8I6XJN9
GO:0007093	mitotic cell cycle checkpoint	2	3	0.0712334	0.777761	A0A8I6WDS1;A0A8I6XJN9
GO:0009211	pyrimidine deoxyribonucleoside triphosphate metabolic process	2	3	0.0712334	0.777761	A0A8I6WHD1;A0A8I7BBH0
GO:0009219	pyrimidine deoxyribonucleotide metabolic process	2	3	0.0712334	0.777761	A0A8I6WHD1;A0A8I7BBH0
GO:0009221	pyrimidine deoxyribonucleotide biosynthetic process	2	3	0.0712334	0.777761	A0A8I6WHD1;A0A8I7BBH0
GO:0009265	2'-deoxyribonucleotide biosynthetic process	2	3	0.0712334	0.777761	A0A8I6WHD1;A0A8I7BBH0
GO:0009394	2'-deoxyribonucleotide metabolic process	2	3	0.0712334	0.777761	A0A8I6WHD1;A0A8I7BBH0
GO:0010286	heat acclimation	2	3	0.0712334	0.777761	F2DAW4;F2EFK9
GO:0010948	negative regulation of cell cycle process	2	3	0.0712334	0.777761	A0A8I6WDS1;A0A8I6XJN9
GO:0019692	deoxyribose phosphate metabolic process	2	3	0.0712334	0.777761	A0A8I6WHD1;A0A8I7BBH0
GO:0019932	second-messenger-mediated signaling	2	3	0.0712334	0.777761	F2CT56;F2CTS1
GO:0030091	protein repair	2	3	0.0712334	0.777761	A0A8I6Y4Z6;F2CZC9
GO:0031120	snRNA pseudouridine synthesis	2	3	0.0712334	0.777761	F2CQY5;F2DDD5
GO:0031400	negative regulation of protein modification process	2	3	0.0712334	0.777761	A0A8I6XJN9;F2DZF2
GO:0034762	regulation of transmembrane transport	2	3	0.0712334	0.777761	F2CWF3;F2DXG7
GO:0034765	regulation of ion transmembrane transport	2	3	0.0712334	0.777761	F2CWF3;F2DXG7
GO:0040031	snRNA modification	2	3	0.0712334	0.777761	F2CQY5;F2DDD5
GO:0043269	regulation of ion transport	2	3	0.0712334	0.777761	F2CWF3;F2DXG7
GO:0045786	negative regulation of cell cycle	2	3	0.0712334	0.777761	A0A8I6WDS1;A0A8I6XJN9
GO:0045930	negative regulation of mitotic cell cycle	2	3	0.0712334	0.777761	A0A8I6WDS1;A0A8I6XJN9
GO:0046385	deoxyribose phosphate biosynthetic process	2	3	0.0712334	0.777761	A0A8I6WHD1;A0A8I7BBH0
GO:0070125	mitochondrial translational elongation	2	3	0.0712334	0.777761	A0A8I6XUG0;F2DXB7
GO:1901988	negative regulation of cell cycle phase transition	2	3	0.0712334	0.777761	A0A8I6WDS1;A0A8I6XJN9
GO:1901991	negative regulation of mitotic cell cycle phase transition	2	3	0.0712334	0.777761	A0A8I6WDS1;A0A8I6XJN9
GO:0051084	'de novo' posttranslational protein folding	5	15	0.0831019	0.777761	A0A8I6WMP9;A0A8I6WR25;A0A8I6YD95;F2CTS4;F2DB07
GO:0051085	chaperone mediated protein folding requiring cofactor	5	15	0.0831019	0.777761	A0A8I6WMP9;A0A8I6WR25;A0A8I6YD95;F2CTS4;F2DB07
GO:0006412	translation	41	205	0.0859624	0.777761	A0A8I6WB19;A0A8I6WQV8;A0A8I6XEF6;A0A8I6XUG0;A0A8I6XWQ1;A0A8I6Z9Z3;A0A8I7BE86;F2CQ03;F2CRW7;F2CS15;F2CS23;F2CSX2;F2CT73;F2CVM4;F2CZ65;F2CZL7;F2D1K5;F2D293;F2D2Y2;F2D483;F2D4K2;F2D558;F2D6M6;F2D702;F2D788;F2DAK3;F2DFA6;F2DHN5;F2DIR3;F2DXB7;F2DXD4;F2E556;F2E5S3;F2E941;F2ECK7;F2EFR1;F2EFV3;F2EG94;F2EIG1;M0XNG3;Q9XHS0
GO:0034645	cellular macromolecule biosynthetic process	63	330	0.0869668	0.777761	A0A287EZS0;A0A2P1AB13;A0A8I6WB19;A0A8I6WDS1;A0A8I6WQV8;A0A8I6XCP7;A0A8I6XDB4;A0A8I6XEF6;A0A8I6XEM6;A0A8I6XH22;A0A8I6XH57;A0A8I6XRV2;A0A8I6XUG0;A0A8I6XWQ1;A0A8I6Z4M3;A0A8I6Z9Z3;A0A8I7B3E6;A0A8I7BE86;A0A8I7BEI9;A0A8I7BFU9;A0A8I7BII2;A1XXI9;C3W8L3;F2CQ03;F2CRW7;F2CS15;F2CS23;F2CSX2;F2CT73;F2CVM4;F2CZ65;F2CZL7;F2D0W0;F2D1K5;F2D293;F2D2Y2;F2D483;F2D4K2;F2D558;F2D6M6;F2D702;F2D788;F2DAK3;F2DFA6;F2DHN5;…
GO:0000018	regulation of DNA recombination	3	7	0.090908	0.777761	A0A8I6WV37;A0A8I6YL06;F2EHE1
GO:0045910	negative regulation of DNA recombination	3	7	0.090908	0.777761	A0A8I6WV37;A0A8I6YL06;F2EHE1
GO:0051053	negative regulation of DNA metabolic process	3	7	0.090908	0.777761	A0A8I6WV37;A0A8I6YL06;F2EHE1
GO:0006364	rRNA processing	11	44	0.0910827	0.777761	A0A8I6X472;A0A8I6XD40;A0A8I6YSL3;F2CQY5;F2CRA3;F2CS23;F2D483;F2DDD5;F2E0C0;F2E556;F2EG94
GO:0016072	rRNA metabolic process	11	44	0.0910827	0.777761	A0A8I6X472;A0A8I6XD40;A0A8I6YSL3;F2CQY5;F2CRA3;F2CS23;F2D483;F2DDD5;F2E0C0;F2E556;F2EG94
GO:0043043	peptide biosynthetic process	41	207	0.0969608	0.777761	A0A8I6WB19;A0A8I6WQV8;A0A8I6XEF6;A0A8I6XUG0;A0A8I6XWQ1;A0A8I6Z9Z3;A0A8I7BE86;F2CQ03;F2CRW7;F2CS15;F2CS23;F2CSX2;F2CT73;F2CVM4;F2CZ65;F2CZL7;F2D1K5;F2D293;F2D2Y2;F2D483;F2D4K2;F2D558;F2D6M6;F2D702;F2D788;F2DAK3;F2DFA6;F2DHN5;F2DIR3;F2DXB7;F2DXD4;F2E556;F2E5S3;F2E941;F2ECK7;F2EFR1;F2EFV3;F2EG94;F2EIG1;M0XNG3;Q9XHS0
GO:0009059	macromolecule biosynthetic process	63	333	0.100401	0.777761	A0A287EZS0;A0A2P1AB13;A0A8I6WB19;A0A8I6WDS1;A0A8I6WQV8;A0A8I6XCP7;A0A8I6XDB4;A0A8I6XEF6;A0A8I6XEM6;A0A8I6XH22;A0A8I6XH57;A0A8I6XRV2;A0A8I6XUG0;A0A8I6XWQ1;A0A8I6Z4M3;A0A8I6Z9Z3;A0A8I7B3E6;A0A8I7BE86;A0A8I7BEI9;A0A8I7BFU9;A0A8I7BII2;A1XXI9;C3W8L3;F2CQ03;F2CRW7;F2CS15;F2CS23;F2CSX2;F2CT73;F2CVM4;F2CZ65;F2CZL7;F2D0W0;F2D1K5;F2D293;F2D2Y2;F2D483;F2D4K2;F2D558;F2D6M6;F2D702;F2D788;F2DAK3;F2DFA6;F2DHN5;…
GO:0051716	cellular response to stimulus	46	236	0.101344	0.777761	A0A287EZS0;A0A287EZV5;A0A287FP91;A0A287FZ34;A0A287U5M5;A0A8I6WDS1;A0A8I6WHE5;A0A8I6WXW1;A0A8I6X017;A0A8I6XCP7;A0A8I6XTB9;A0A8I6Y5Z0;A0A8I6YIV5;A0A8I6YS17;A0A8I6YT49;A0A8I6YXG5;A0A8I6YZG5;A0A8I6Z0S4;A0A8I6Z4M3;A0A8I7B2K7;A1X810;A1XXI9;F2CPL2;F2CQH9;F2CQX6;F2CRG7;F2CT56;F2CTS1;F2D0W0;F2D7S9;F2D9U3;F2DAR0;F2DAW4;F2DC93;F2DHP2;F2DNW4;F2DQH1;F2DS97;F2DUJ6;F2DZN2;F2E0P9;F2E3X1;F2EFK9;F2ELJ9;M0V3S6;M0XG…
GO:0071705	nitrogen compound transport	9	35	0.104094	0.777761	A0A287Q7U2;A0A8I6YEZ5;A0A8I6YLT8;F2CWC9;F2D6G3;F2D8K0;F2DG80;F2DGM5;F2E4I7
GO:0042364	water-soluble vitamin biosynthetic process	5	16	0.105366	0.777761	A0A8I6YQI6;A0A8I6YQU0;F2DR63;F2DYM4;F2EDT9
GO:0030490	maturation of SSU-rRNA	4	12	0.117742	0.777761	A0A8I6X472;F2CS23;F2D483;F2E556
GO:0001522	pseudouridine synthesis	2	4	0.127244	0.777761	F2CQY5;F2DDD5
GO:0006542	glutamine biosynthetic process	2	4	0.127244	0.777761	A0A8I6Y4J8;F2E3I7
GO:0006546	glycine catabolic process	2	4	0.127244	0.777761	F2DDV8;F2DZ70
GO:0007041	lysosomal transport	2	4	0.127244	0.777761	A0A8I6WHM6;F2DP42
GO:0007264	small GTPase mediated signal transduction	2	4	0.127244	0.777761	A0A287FZ34;A0A8I7B2K7
GO:0009133	nucleoside diphosphate biosynthetic process	2	4	0.127244	0.777761	A0A8I6WHD1;F2EIL0
GO:0009138	pyrimidine nucleoside diphosphate metabolic process	2	4	0.127244	0.777761	A0A8I6WHD1;F2EIL0
GO:0009139	pyrimidine nucleoside diphosphate biosynthetic process	2	4	0.127244	0.777761	A0A8I6WHD1;F2EIL0
GO:0009200	deoxyribonucleoside triphosphate metabolic process	2	4	0.127244	0.777761	A0A8I6WHD1;A0A8I7BBH0
GO:0009751	response to salicylic acid	2	4	0.127244	0.777761	F2CPL2;F2DGM5
GO:0009875	pollen-pistil interaction	2	4	0.127244	0.777761	A0A8I6XBD2;F2E3X1
GO:0016925	protein sumoylation	2	4	0.127244	0.777761	A0A8I7BF02;F2CW55
GO:0016973	poly(A)+ mRNA export from nucleus	2	4	0.127244	0.777761	F2D8K0;F2E4I7
GO:0018205	peptidyl-lysine modification	2	4	0.127244	0.777761	A0A8I7BF02;F2CW55
GO:0031118	rRNA pseudouridine synthesis	2	4	0.127244	0.777761	F2CQY5;F2DDD5
GO:0033356	UDP-L-arabinose metabolic process	2	4	0.127244	0.777761	A0A0U2GJJ3;A0A0U2GJL1
GO:0045490	pectin catabolic process	2	4	0.127244	0.777761	A0A8I6WS80;F2ELP4
GO:0051123	RNA polymerase II transcriptional preinitiation complex assembly	2	4	0.127244	0.777761	A0A8I6XEM6;F2ECG8
GO:0070897	DNA-templated transcriptional preinitiation complex assembly	2	4	0.127244	0.777761	A0A8I6XEM6;F2ECG8
GO:0097428	protein maturation by iron-sulfur cluster transfer	2	4	0.127244	0.777761	F2D5L4;F2E4D2
GO:1901259	chloroplast rRNA processing	2	4	0.127244	0.777761	A0A8I6XD40;F2CRA3
GO:1901987	regulation of cell cycle phase transition	2	4	0.127244	0.777761	A0A8I6WDS1;A0A8I6XJN9
GO:1901990	regulation of mitotic cell cycle phase transition	2	4	0.127244	0.777761	A0A8I6WDS1;A0A8I6XJN9
GO:0000462	maturation of SSU-rRNA from tricistronic rRNA transcript (SSU-rRNA, 5.8S rRNA, LSU-rRNA)	3	8	0.128402	0.777761	F2CS23;F2D483;F2E556
GO:0005978	glycogen biosynthetic process	3	8	0.128402	0.777761	A0A2P1AB13;A0A8I7BFU9;C3W8L3
GO:0009089	lysine biosynthetic process via diaminopimelate	3	8	0.128402	0.777761	A0A8I6WWJ7;A0A8I6XPB3;F2D643
GO:0030261	chromosome condensation	3	8	0.128402	0.777761	A0A8I6WV37;A0A8I6YL06;F2EHE1
GO:0031399	regulation of protein modification process	3	8	0.128402	0.777761	A0A8I6XJN9;A0A8I6YIV5;F2DZF2
GO:0046451	diaminopimelate metabolic process	3	8	0.128402	0.777761	A0A8I6WWJ7;A0A8I6XPB3;F2D643
GO:0006458	'de novo' protein folding	5	17	0.130229	0.777761	A0A8I6WMP9;A0A8I6WR25;A0A8I6YD95;F2CTS4;F2DB07
GO:0071103	DNA conformation change	6	22	0.135968	0.777761	A0A287U5M5;A0A8I6WV37;A0A8I6YL06;A0A8I6YZG5;F2CUP3;F2EHE1
GO:0006119	oxidative phosphorylation	7	27	0.138081	0.777761	A0A8I6WTI3;A0A8I6YH05;F2CT87;F2D7B2;F2DMM2;F2E2B0;F2EL27
GO:0006310	DNA recombination	7	27	0.138081	0.777761	A0A287U5M5;A0A8I6WV37;A0A8I6YL06;A0A8I6YZG5;F2D0W0;F2DNW4;F2EHE1
GO:0042773	ATP synthesis coupled electron transport	7	27	0.138081	0.777761	A0A8I6WTI3;A0A8I6YH05;F2CT87;F2D7B2;F2DMM2;F2E2B0;F2EL27
GO:0043412	macromolecule modification	22	107	0.14202	0.777761	A0A8I6X0M9;A0A8I6X472;A0A8I6X7M2;A0A8I6X7Q6;A0A8I6XH22;A0A8I6XH57;A0A8I6XJN9;A0A8I6XRV2;A0A8I6YHZ7;A0A8I6YIV5;A0A8I6YNI8;A0A8I6YUS4;A0A8I7BF02;A0A8I7BII2;F2CQH9;F2CQY5;F2CW55;F2D7S9;F2DDD5;F2DP42;F2DZF2;F2E3I5
GO:0006406	mRNA export from nucleus	4	13	0.149187	0.777761	A0A8I6YLT8;F2D6G3;F2D8K0;F2E4I7
GO:0045934	negative regulation of nucleobase-containing compound metabolic process	4	13	0.149187	0.777761	A0A8I6WV37;A0A8I6YL06;F2EHE1;M0Y7Q2
GO:0071427	mRNA-containing ribonucleoprotein complex export from nucleus	4	13	0.149187	0.777761	A0A8I6YLT8;F2D6G3;F2D8K0;F2E4I7
GO:0009737	response to abscisic acid	10	43	0.151399	0.777761	A0A8I6WGX0;A0A8I6XWW8;A1XXI9;F2CPL2;F2DAR0;F2DXX0;F2E4I7;F2EF30;Q43488;T1TD43
GO:0009725	response to hormone	13	59	0.153774	0.777761	A0A8I6WGX0;A0A8I6WXW1;A0A8I6XWW8;A0A8I6Z4M3;A1XXI9;F2CPL2;F2D7S9;F2DAR0;F2DXX0;F2E4I7;F2EF30;Q43488;T1TD43
GO:0009110	vitamin biosynthetic process	5	18	0.15746	0.777761	A0A8I6YQI6;A0A8I6YQU0;F2DR63;F2DYM4;F2EDT9
GO:0032879	regulation of localization	5	18	0.15746	0.777761	F2CQY5;F2CWF3;F2DXG7;F2E3M7;M0XN08
GO:0061077	chaperone-mediated protein folding	5	18	0.15746	0.777761	A0A8I6WMP9;A0A8I6WR25;A0A8I6YD95;F2CTS4;F2DB07
GO:0000076	DNA replication checkpoint	1	1	0.163361	0.777761	A0A8I6WDS1
GO:0000303	response to superoxide	1	1	0.163361	0.777761	F2CQX6
GO:0000305	response to oxygen radical	1	1	0.163361	0.777761	F2CQX6
GO:0000495	box H/ACA snoRNA 3'-end processing	1	1	0.163361	0.777761	F2DDD5
GO:0001173	DNA-templated transcriptional start site selection	1	1	0.163361	0.777761	F2ECG8
GO:0001174	transcriptional start site selection at RNA polymerase II promoter	1	1	0.163361	0.777761	F2ECG8
GO:0001709	cell fate determination	1	1	0.163361	0.777761	A0A8I6Z1P9
GO:0002097	tRNA wobble base modification	1	1	0.163361	0.777761	A0A8I6X472
GO:0002101	tRNA wobble cytosine modification	1	1	0.163361	0.777761	A0A8I6X472
GO:0003015	heart process	1	1	0.163361	0.777761	A0A8I6XBH2
GO:0003254	regulation of membrane depolarization	1	1	0.163361	0.777761	A0A8I6XBH2
GO:0005988	lactose metabolic process	1	1	0.163361	0.777761	A0A8I6XUU4
GO:0005990	lactose catabolic process	1	1	0.163361	0.777761	A0A8I6XUU4
GO:0006015	5-phosphoribose 1-diphosphate biosynthetic process	1	1	0.163361	0.777761	F2D119
GO:0006227	dUDP biosynthetic process	1	1	0.163361	0.777761	A0A8I6WHD1
GO:0006233	dTDP biosynthetic process	1	1	0.163361	0.777761	A0A8I6WHD1
GO:0006235	dTTP biosynthetic process	1	1	0.163361	0.777761	A0A8I6WHD1
GO:0006342	chromatin silencing	1	1	0.163361	0.777761	M0Y7Q2
GO:0006346	methylation-dependent chromatin silencing	1	1	0.163361	0.777761	M0Y7Q2
GO:0006420	arginyl-tRNA aminoacylation	1	1	0.163361	0.777761	A0A8I6WQV8
GO:0006423	cysteinyl-tRNA aminoacylation	1	1	0.163361	0.777761	F2E5S3
GO:0006427	histidyl-tRNA aminoacylation	1	1	0.163361	0.777761	F2EFV3
GO:0006470	protein dephosphorylation	1	1	0.163361	0.777761	F2DZF2
GO:0006592	ornithine biosynthetic process	1	1	0.163361	0.777761	F2CW53
GO:0006788	heme oxidation	1	1	0.163361	0.777761	F2DC91
GO:0006808	regulation of nitrogen utilization	1	1	0.163361	0.777761	F2DSZ9
GO:0007091	metaphase/anaphase transition of mitotic cell cycle	1	1	0.163361	0.777761	A0A8I6XJN9
GO:0007094	mitotic spindle assembly checkpoint	1	1	0.163361	0.777761	A0A8I6XJN9
GO:0007186	G-protein coupled receptor signaling pathway	1	1	0.163361	0.777761	F2DZN2
GO:0007205	protein kinase C-activating G-protein coupled receptor signaling pathway	1	1	0.163361	0.777761	F2DZN2
GO:0007602	phototransduction	1	1	0.163361	0.777761	A0A8I6XCP7
GO:0008283	cell proliferation	1	1	0.163361	0.777761	F2E3M7
GO:0008333	endosome to lysosome transport	1	1	0.163361	0.777761	F2DP42
GO:0009186	deoxyribonucleoside diphosphate metabolic process	1	1	0.163361	0.777761	A0A8I6WHD1
GO:0009189	deoxyribonucleoside diphosphate biosynthetic process	1	1	0.163361	0.777761	A0A8I6WHD1
GO:0009196	pyrimidine deoxyribonucleoside diphosphate metabolic process	1	1	0.163361	0.777761	A0A8I6WHD1
GO:0009197	pyrimidine deoxyribonucleoside diphosphate biosynthetic process	1	1	0.163361	0.777761	A0A8I6WHD1
GO:0009202	deoxyribonucleoside triphosphate biosynthetic process	1	1	0.163361	0.777761	A0A8I6WHD1
GO:0009212	pyrimidine deoxyribonucleoside triphosphate biosynthetic process	1	1	0.163361	0.777761	A0A8I6WHD1
GO:0009299	mRNA transcription	1	1	0.163361	0.777761	A0A8I7B3E6
GO:0009450	gamma-aminobutyric acid catabolic process	1	1	0.163361	0.777761	A0A8I6Z0L1
GO:0009581	detection of external stimulus	1	1	0.163361	0.777761	A0A8I6XCP7
GO:0009582	detection of abiotic stimulus	1	1	0.163361	0.777761	A0A8I6XCP7
GO:0009583	detection of light stimulus	1	1	0.163361	0.777761	A0A8I6XCP7
GO:0009584	detection of visible light	1	1	0.163361	0.777761	A0A8I6XCP7
GO:0009585	red, far-red light phototransduction	1	1	0.163361	0.777761	A0A8I6XCP7
GO:0009696	salicylic acid metabolic process	1	1	0.163361	0.777761	A0A8I6WT14
GO:0009859	pollen hydration	1	1	0.163361	0.777761	F2E3X1
GO:0009895	negative regulation of catabolic process	1	1	0.163361	0.777761	A0A8I6XJN9
GO:0010024	phytochromobilin biosynthetic process	1	1	0.163361	0.777761	F2DC91
GO:0010109	regulation of photosynthesis	1	1	0.163361	0.777761	F2CRK1
GO:0010241	ent-kaurene oxidation to kaurenoic acid	1	1	0.163361	0.777761	F2DZK7
GO:0010387	COP9 signalosome assembly	1	1	0.163361	0.777761	A0A8I6X7Q6
GO:0010477	response to sulfur dioxide	1	1	0.163361	0.777761	F2CVB4
GO:0010959	regulation of metal ion transport	1	1	0.163361	0.777761	F2CWF3
GO:0010960	magnesium ion homeostasis	1	1	0.163361	0.777761	F2D2S2
GO:0010965	regulation of mitotic sister chromatid separation	1	1	0.163361	0.777761	A0A8I6XJN9
GO:0010992	ubiquitin homeostasis	1	1	0.163361	0.777761	A0A8I6WKG3
GO:0015780	nucleotide-sugar transport	1	1	0.163361	0.777761	F2DG80
GO:0015781	pyrimidine nucleotide-sugar transport	1	1	0.163361	0.777761	F2DG80
GO:0015785	UDP-galactose transport	1	1	0.163361	0.777761	F2DG80
GO:0016024	CDP-diacylglycerol biosynthetic process	1	1	0.163361	0.777761	F2CPX3
GO:0016569	covalent chromatin modification	1	1	0.163361	0.777761	M0Y7Q2
GO:0019217	regulation of fatty acid metabolic process	1	1	0.163361	0.777761	F2DSZ9
GO:0019430	removal of superoxide radicals	1	1	0.163361	0.777761	F2CQX6
GO:0019740	nitrogen utilization	1	1	0.163361	0.777761	F2DSZ9
GO:0022417	protein maturation by protein folding	1	1	0.163361	0.777761	F2CXT5
GO:0030026	cellular manganese ion homeostasis	1	1	0.163361	0.777761	F2D2S2
GO:0030071	regulation of mitotic metaphase/anaphase transition	1	1	0.163361	0.777761	A0A8I6XJN9
GO:0030330	DNA damage response, signal transduction by p53 class mediator	1	1	0.163361	0.777761	F2DC93
GO:0030575	nuclear body organization	1	1	0.163361	0.777761	F2E3M7
GO:0030576	Cajal body organization	1	1	0.163361	0.777761	F2E3M7
GO:0031330	negative regulation of cellular catabolic process	1	1	0.163361	0.777761	A0A8I6XJN9
GO:0031396	regulation of protein ubiquitination	1	1	0.163361	0.777761	A0A8I6XJN9
GO:0031397	negative regulation of protein ubiquitination	1	1	0.163361	0.777761	A0A8I6XJN9
GO:0031503	protein complex localization	1	1	0.163361	0.777761	A0A8I6YXG1
GO:0031577	spindle checkpoint	1	1	0.163361	0.777761	A0A8I6XJN9
GO:0032435	negative regulation of proteasomal ubiquitin-dependent protein catabolic process	1	1	0.163361	0.777761	A0A8I6XJN9
GO:0033044	regulation of chromosome organization	1	1	0.163361	0.777761	A0A8I6XJN9
GO:0033045	regulation of sister chromatid segregation	1	1	0.163361	0.777761	A0A8I6XJN9
GO:0033046	negative regulation of sister chromatid segregation	1	1	0.163361	0.777761	A0A8I6XJN9
GO:0033047	regulation of mitotic sister chromatid segregation	1	1	0.163361	0.777761	A0A8I6XJN9
GO:0033048	negative regulation of mitotic sister chromatid segregation	1	1	0.163361	0.777761	A0A8I6XJN9
GO:0033314	mitotic DNA replication checkpoint	1	1	0.163361	0.777761	A0A8I6WDS1
GO:0033331	ent-kaurene metabolic process	1	1	0.163361	0.777761	F2DZK7
GO:0033979	box H/ACA snoRNA metabolic process	1	1	0.163361	0.777761	F2DDD5
GO:0034219	carbohydrate transmembrane transport	1	1	0.163361	0.777761	F2DG80
GO:0034629	cellular protein complex localization	1	1	0.163361	0.777761	A0A8I6YXG1
GO:0034964	box H/ACA snoRNA processing	1	1	0.163361	0.777761	F2DDD5
GO:0035304	regulation of protein dephosphorylation	1	1	0.163361	0.777761	F2DZF2
GO:0035305	negative regulation of dephosphorylation	1	1	0.163361	0.777761	F2DZF2
GO:0035308	negative regulation of protein dephosphorylation	1	1	0.163361	0.777761	F2DZF2
GO:0035329	hippo signaling	1	1	0.163361	0.777761	A0A8I6YIV5
GO:0035621	ER to Golgi ceramide transport	1	1	0.163361	0.777761	F2DGM5
GO:0042149	cellular response to glucose starvation	1	1	0.163361	0.777761	F2E3X1
GO:0042177	negative regulation of protein catabolic process	1	1	0.163361	0.777761	A0A8I6XJN9
GO:0042304	regulation of fatty acid biosynthetic process	1	1	0.163361	0.777761	F2DSZ9
GO:0042306	regulation of protein import into nucleus	1	1	0.163361	0.777761	F2E3M7
GO:0042307	positive regulation of protein import into nucleus	1	1	0.163361	0.777761	F2E3M7
GO:0042391	regulation of membrane potential	1	1	0.163361	0.777761	A0A8I6XBH2
GO:0042447	hormone catabolic process	1	1	0.163361	0.777761	A0A8I6WT04
GO:0042548	regulation of photosynthesis, light reaction	1	1	0.163361	0.777761	F2CRK1
GO:0042549	photosystem II stabilization	1	1	0.163361	0.777761	F2CRK1
GO:0042632	cholesterol homeostasis	1	1	0.163361	0.777761	A0A8I6YMC3
GO:0042770	signal transduction in response to DNA damage	1	1	0.163361	0.777761	F2DC93
GO:0043086	negative regulation of catalytic activity	1	1	0.163361	0.777761	A0A8I6XJN9
GO:0043266	regulation of potassium ion transport	1	1	0.163361	0.777761	F2CWF3
GO:0043467	regulation of generation of precursor metabolites and energy	1	1	0.163361	0.777761	F2CRK1
GO:0043687	post-translational protein modification	1	1	0.163361	0.777761	A0A8I6XRV2
GO:0044092	negative regulation of molecular function	1	1	0.163361	0.777761	A0A8I6XJN9
GO:0044784	metaphase/anaphase transition of cell cycle	1	1	0.163361	0.777761	A0A8I6XJN9
GO:0045165	cell fate commitment	1	1	0.163361	0.777761	A0A8I6Z1P9
GO:0045814	negative regulation of gene expression, epigenetic	1	1	0.163361	0.777761	M0Y7Q2
GO:0045839	negative regulation of mitotic nuclear division	1	1	0.163361	0.777761	A0A8I6XJN9
GO:0045841	negative regulation of mitotic metaphase/anaphase transition	1	1	0.163361	0.777761	A0A8I6XJN9
GO:0045861	negative regulation of proteolysis	1	1	0.163361	0.777761	A0A8I6XJN9
GO:0046072	dTDP metabolic process	1	1	0.163361	0.777761	A0A8I6WHD1
GO:0046075	dTTP metabolic process	1	1	0.163361	0.777761	A0A8I6WHD1
GO:0046077	dUDP metabolic process	1	1	0.163361	0.777761	A0A8I6WHD1
GO:0046341	CDP-diacylglycerol metabolic process	1	1	0.163361	0.777761	F2CPX3
GO:0046391	5-phosphoribose 1-diphosphate metabolic process	1	1	0.163361	0.777761	F2D119
GO:0046686	response to cadmium ion	1	1	0.163361	0.777761	F2CPL2
GO:0046822	regulation of nucleocytoplasmic transport	1	1	0.163361	0.777761	F2E3M7
GO:0046824	positive regulation of nucleocytoplasmic transport	1	1	0.163361	0.777761	F2E3M7
GO:0050435	beta-amyloid metabolic process	1	1	0.163361	0.777761	A0A8I6WT04
GO:0050790	regulation of catalytic activity	1	1	0.163361	0.777761	A0A8I6XJN9
GO:0051202	phytochromobilin metabolic process	1	1	0.163361	0.777761	F2DC91
GO:0051304	chromosome separation	1	1	0.163361	0.777761	A0A8I6XJN9
GO:0051306	mitotic sister chromatid separation	1	1	0.163361	0.777761	A0A8I6XJN9
GO:0051338	regulation of transferase activity	1	1	0.163361	0.777761	A0A8I6XJN9
GO:0051340	regulation of ligase activity	1	1	0.163361	0.777761	A0A8I6XJN9
GO:0051348	negative regulation of transferase activity	1	1	0.163361	0.777761	A0A8I6XJN9
GO:0051352	negative regulation of ligase activity	1	1	0.163361	0.777761	A0A8I6XJN9
GO:0051391	tRNA acetylation	1	1	0.163361	0.777761	A0A8I6X472
GO:0051436	negative regulation of ubiquitin-protein ligase activity involved in mitotic cell cycle	1	1	0.163361	0.777761	A0A8I6XJN9
GO:0051438	regulation of ubiquitin-protein transferase activity	1	1	0.163361	0.777761	A0A8I6XJN9
GO:0051439	regulation of ubiquitin-protein ligase activity involved in mitotic cell cycle	1	1	0.163361	0.777761	A0A8I6XJN9
GO:0051444	negative regulation of ubiquitin-protein transferase activity	1	1	0.163361	0.777761	A0A8I6XJN9
GO:0051601	exocyst localization	1	1	0.163361	0.777761	A0A8I6YXG1
GO:0051782	negative regulation of cell division	1	1	0.163361	0.777761	A0A8I6XJN9
GO:0051784	negative regulation of nuclear division	1	1	0.163361	0.777761	A0A8I6XJN9
GO:0051899	membrane depolarization	1	1	0.163361	0.777761	A0A8I6XBH2
GO:0051983	regulation of chromosome segregation	1	1	0.163361	0.777761	A0A8I6XJN9
GO:0051985	negative regulation of chromosome segregation	1	1	0.163361	0.777761	A0A8I6XJN9
GO:0055071	manganese ion homeostasis	1	1	0.163361	0.777761	F2D2S2
GO:0055092	sterol homeostasis	1	1	0.163361	0.777761	A0A8I6YMC3
GO:0060047	heart contraction	1	1	0.163361	0.777761	A0A8I6XBH2
GO:0061512	protein localization to cilium	1	1	0.163361	0.777761	M0XN08
GO:0061564	axon development	1	1	0.163361	0.777761	F2E3M7
GO:0065009	regulation of molecular function	1	1	0.163361	0.777761	A0A8I6XJN9
GO:0071173	spindle assembly checkpoint	1	1	0.163361	0.777761	A0A8I6XJN9
GO:0071174	mitotic spindle checkpoint	1	1	0.163361	0.777761	A0A8I6XJN9
GO:0071450	cellular response to oxygen radical	1	1	0.163361	0.777761	F2CQX6
GO:0071451	cellular response to superoxide	1	1	0.163361	0.777761	F2CQX6
GO:0071804	cellular potassium ion transport	1	1	0.163361	0.777761	F2CWF3
GO:0071805	potassium ion transmembrane transport	1	1	0.163361	0.777761	F2CWF3
GO:0072331	signal transduction by p53 class mediator	1	1	0.163361	0.777761	F2DC93
GO:0072334	UDP-galactose transmembrane transport	1	1	0.163361	0.777761	F2DG80
GO:0072531	pyrimidine-containing compound transmembrane transport	1	1	0.163361	0.777761	F2DG80
GO:0090160	Golgi to lysosome transport	1	1	0.163361	0.777761	A0A8I6WHM6
GO:0090481	pyrimidine nucleotide-sugar transmembrane transport	1	1	0.163361	0.777761	F2DG80
GO:0090670	RNA localization to Cajal body	1	1	0.163361	0.777761	F2CQY5
GO:0090671	telomerase RNA localization to Cajal body	1	1	0.163361	0.777761	F2CQY5
GO:0090672	telomerase RNA localization	1	1	0.163361	0.777761	F2CQY5
GO:1900180	regulation of protein localization to nucleus	1	1	0.163361	0.777761	F2E3M7
GO:1900182	positive regulation of protein localization to nucleus	1	1	0.163361	0.777761	F2E3M7
GO:1901379	regulation of potassium ion transmembrane transport	1	1	0.163361	0.777761	F2CWF3
GO:1901799	negative regulation of proteasomal protein catabolic process	1	1	0.163361	0.777761	A0A8I6XJN9
GO:1902099	regulation of metaphase/anaphase transition of cell cycle	1	1	0.163361	0.777761	A0A8I6XJN9
GO:1902100	negative regulation of metaphase/anaphase transition of cell cycle	1	1	0.163361	0.777761	A0A8I6XJN9
GO:1903051	negative regulation of proteolysis involved in cellular protein catabolic process	1	1	0.163361	0.777761	A0A8I6XJN9
GO:1903076	regulation of protein localization to plasma membrane	1	1	0.163361	0.777761	M0XN08
GO:1903078	positive regulation of protein localization to plasma membrane	1	1	0.163361	0.777761	M0XN08
GO:1903259	exon-exon junction complex disassembly	1	1	0.163361	0.777761	A0A8I6Y871
GO:1903320	regulation of protein modification by small protein conjugation or removal	1	1	0.163361	0.777761	A0A8I6XJN9
GO:1903321	negative regulation of protein modification by small protein conjugation or removal	1	1	0.163361	0.777761	A0A8I6XJN9
GO:1903363	negative regulation of cellular protein catabolic process	1	1	0.163361	0.777761	A0A8I6XJN9
GO:1903441	protein localization to ciliary membrane	1	1	0.163361	0.777761	M0XN08
GO:1903457	lactate catabolic process	1	1	0.163361	0.777761	F2DSA8
GO:1903533	regulation of protein targeting	1	1	0.163361	0.777761	F2E3M7
GO:1903564	regulation of protein localization to cilium	1	1	0.163361	0.777761	M0XN08
GO:1903566	positive regulation of protein localization to cilium	1	1	0.163361	0.777761	M0XN08
GO:1903567	regulation of protein localization to ciliary membrane	1	1	0.163361	0.777761	M0XN08
GO:1903569	positive regulation of protein localization to ciliary membrane	1	1	0.163361	0.777761	M0XN08
GO:1903729	regulation of plasma membrane organization	1	1	0.163361	0.777761	M0XN08
GO:1904062	regulation of cation transmembrane transport	1	1	0.163361	0.777761	F2CWF3
GO:1904375	regulation of protein localization to cell periphery	1	1	0.163361	0.777761	M0XN08
GO:1904377	positive regulation of protein localization to cell periphery	1	1	0.163361	0.777761	M0XN08
GO:1904589	regulation of protein import	1	1	0.163361	0.777761	F2E3M7
GO:1904591	positive regulation of protein import	1	1	0.163361	0.777761	F2E3M7
GO:1904666	regulation of ubiquitin protein ligase activity	1	1	0.163361	0.777761	A0A8I6XJN9
GO:1904667	negative regulation of ubiquitin protein ligase activity	1	1	0.163361	0.777761	A0A8I6XJN9
GO:1904812	rRNA acetylation involved in maturation of SSU-rRNA	1	1	0.163361	0.777761	A0A8I6X472
GO:1904872	regulation of telomerase RNA localization to Cajal body	1	1	0.163361	0.777761	F2CQY5
GO:1904874	positive regulation of telomerase RNA localization to Cajal body	1	1	0.163361	0.777761	F2CQY5
GO:1990481	mRNA pseudouridine synthesis	1	1	0.163361	0.777761	F2DDD5
GO:1990882	rRNA acetylation	1	1	0.163361	0.777761	A0A8I6X472
GO:1990884	RNA acetylation	1	1	0.163361	0.777761	A0A8I6X472
GO:2000377	regulation of reactive oxygen species metabolic process	1	1	0.163361	0.777761	F2E3X1
GO:2000816	negative regulation of mitotic sister chromatid separation	1	1	0.163361	0.777761	A0A8I6XJN9
GO:2001251	negative regulation of chromosome organization	1	1	0.163361	0.777761	A0A8I6XJN9
GO:2001293	malonyl-CoA metabolic process	1	1	0.163361	0.777761	A0A5C1YV39
GO:2001295	malonyl-CoA biosynthetic process	1	1	0.163361	0.777761	A0A5C1YV39
GO:0009719	response to endogenous stimulus	13	60	0.168883	0.801534	A0A8I6WGX0;A0A8I6WXW1;A0A8I6XWW8;A0A8I6Z4M3;A1XXI9;F2CPL2;F2D7S9;F2DAR0;F2DXX0;F2E4I7;F2EF30;Q43488;T1TD43
GO:0006089	lactate metabolic process	3	9	0.17026	0.803031	A0A8I6XQ26;F2DHZ5;F2DSA8
GO:0009085	lysine biosynthetic process	3	9	0.17026	0.803031	A0A8I6WWJ7;A0A8I6XPB3;F2D643
GO:0051704	multi-organism process	11	50	0.181352	0.835181	A0A8I6WJN4;A0A8I6XBD2;A0A8I6XTL4;A0A8I7BCT1;F2CQV7;F2DE94;F2DGM5;F2DHZ5;F2E3X1;F2EGM1;M0WNW4
GO:0009611	response to wounding	4	14	0.183418	0.835181	A8V3Q1;A8V3Y1;M0XBS5;Q9M4C9
GO:0007005	mitochondrion organization	15	72	0.185759	0.835181	A0A8I6WIA9;A0A8I6WQV8;A0A8I6XUG0;A0A8I6ZA75;F2CVM4;F2CXT5;F2DIG1;F2DK52;F2DLN6;F2DXB7;F2E3X1;F2E405;F2EFV3;F2EIG1;M0XN08
GO:0006900	membrane budding	6	24	0.185893	0.835181	A0A8I6WMI1;A0A8I6WTQ8;F2CT83;F2D2Z9;F2DA66;F2DVS7
GO:0097305	response to alcohol	10	45	0.187822	0.835181	A0A8I6WGX0;A0A8I6XWW8;A1XXI9;F2CPL2;F2DAR0;F2DXX0;F2E4I7;F2EF30;Q43488;T1TD43
GO:0000338	protein deneddylation	2	5	0.189764	0.835181	A0A8I6X7Q6;A0A8I6YUS4
GO:0006123	mitochondrial electron transport, cytochrome c to oxygen	2	5	0.189764	0.835181	F2DMM2;F2E2B0
GO:0006570	tyrosine metabolic process	2	5	0.189764	0.835181	A0A8I6YFL0;A0A8I7BJR0
GO:0006616	SRP-dependent cotranslational protein targeting to membrane, translocation	2	5	0.189764	0.835181	F2CV17;F2CWN4
GO:0009262	deoxyribonucleotide metabolic process	2	5	0.189764	0.835181	A0A8I6WHD1;A0A8I7BBH0
GO:0009263	deoxyribonucleotide biosynthetic process	2	5	0.189764	0.835181	A0A8I6WHD1;A0A8I7BBH0
GO:0009686	gibberellin biosynthetic process	2	5	0.189764	0.835181	F2DZK7;Q673G6
GO:0010393	galacturonan metabolic process	2	5	0.189764	0.835181	A0A8I6WS80;F2ELP4
GO:0016073	snRNA metabolic process	2	5	0.189764	0.835181	F2CQY5;F2DDD5
GO:0016102	diterpenoid biosynthetic process	2	5	0.189764	0.835181	F2DZK7;Q673G6
GO:0032880	regulation of protein localization	2	5	0.189764	0.835181	F2E3M7;M0XN08
GO:0034063	stress granule assembly	2	5	0.189764	0.835181	A0A8I6X1I1;F2D6M6
GO:0042545	cell wall modification	2	5	0.189764	0.835181	A0A8I6WS80;F2ELP4
GO:0045488	pectin metabolic process	2	5	0.189764	0.835181	A0A8I6WS80;F2ELP4
GO:0071569	protein ufmylation	2	5	0.189764	0.835181	A0A8I6YHZ7;F2E3I5
GO:0090158	endoplasmic reticulum membrane organization	2	5	0.189764	0.835181	A0A8I6WWA9;F2E3J0
GO:1903827	regulation of cellular protein localization	2	5	0.189764	0.835181	F2E3M7;M0XN08
GO:1903829	positive regulation of cellular protein localization	2	5	0.189764	0.835181	F2E3M7;M0XN08
GO:0044271	cellular nitrogen compound biosynthetic process	69	384	0.193093	0.84737	A0A5C1YV39;A0A8I6WB19;A0A8I6WHD1;A0A8I6WKM0;A0A8I6WQV8;A0A8I6X6B1;A0A8I6XCP7;A0A8I6XD03;A0A8I6XDB4;A0A8I6XEF6;A0A8I6XEM6;A0A8I6XUG0;A0A8I6XWQ1;A0A8I6YQI6;A0A8I6YQU0;A0A8I6Z4M3;A0A8I6Z9Z3;A0A8I7B3E6;A0A8I7BBH0;A0A8I7BE86;A0A8I7BEI9;A1XXI9;F2CQ03;F2CRW7;F2CS15;F2CS23;F2CSX2;F2CT73;F2CVM4;F2CWQ6;F2CZ65;F2CZL7;F2D119;F2D1K5;F2D293;F2D2Y2;F2D483;F2D4K2;F2D558;F2D6M6;F2D702;F2D788;F2DAK3;F2DC91;F2DFA6;…
GO:0031324	negative regulation of cellular metabolic process	9	40	0.194387	0.850582	A0A8I6WV37;A0A8I6XJN9;A0A8I6YL06;A0A8I6Z9Z3;F2CQ03;F2D6M6;F2DZF2;F2EHE1;M0Y7Q2
GO:0036211	protein modification process	19	95	0.19713	0.860098	A0A8I6X0M9;A0A8I6X7M2;A0A8I6X7Q6;A0A8I6XH22;A0A8I6XH57;A0A8I6XJN9;A0A8I6XRV2;A0A8I6YHZ7;A0A8I6YIV5;A0A8I6YNI8;A0A8I6YUS4;A0A8I7BF02;A0A8I7BII2;F2CQH9;F2CW55;F2D7S9;F2DP42;F2DZF2;F2E3I5
GO:0006461	protein complex assembly	20	101	0.202298	0.877591	A0A287U5M5;A0A8I6WMI1;A0A8I6WV37;A0A8I6X0M9;A0A8I6X7Q6;A0A8I6XBL4;A0A8I6XJF2;A0A8I6YL06;A0A8I6YZG5;A0A8I6ZA75;A0A8I7B995;F2CRK1;F2CU44;F2CUP3;F2CX02;F2DK52;F2E4D2;F2ECG8;F2ED67;F2EHE1
GO:0070271	protein complex biogenesis	20	101	0.202298	0.877591	A0A287U5M5;A0A8I6WMI1;A0A8I6WV37;A0A8I6X0M9;A0A8I6X7Q6;A0A8I6XBL4;A0A8I6XJF2;A0A8I6YL06;A0A8I6YZG5;A0A8I6ZA75;A0A8I7B995;F2CRK1;F2CU44;F2CUP3;F2CX02;F2DK52;F2E4D2;F2ECG8;F2ED67;F2EHE1
GO:0043170	macromolecule metabolic process	153	889	0.206975	0.881728	A0A287EZS0;A0A287NWK0;A0A287U5M5;A0A2P1AB13;A0A8I6W6F0;A0A8I6WB19;A0A8I6WDS1;A0A8I6WFJ6;A0A8I6WKG3;A0A8I6WQV8;A0A8I6WS80;A0A8I6WT04;A0A8I6WT13;A0A8I6WV37;A0A8I6X0M9;A0A8I6X472;A0A8I6X7M2;A0A8I6X7Q6;A0A8I6XCP7;A0A8I6XD40;A0A8I6XDB4;A0A8I6XEF6;A0A8I6XEM6;A0A8I6XEP7;A0A8I6XEW3;A0A8I6XF02;A0A8I6XH22;A0A8I6XH57;A0A8I6XJN9;A0A8I6XQQ9;A0A8I6XQV5;A0A8I6XRV2;A0A8I6XSD2;A0A8I6XUG0;A0A8I6XWQ1;A0A8I6Y0T7;A0A…
GO:0006403	RNA localization	7	30	0.207327	0.881728	A0A287Q7U2;A0A8I6YEZ5;A0A8I6YLT8;F2CQY5;F2D6G3;F2D8K0;F2E4I7
GO:0033993	response to lipid	10	46	0.207386	0.881728	A0A8I6WGX0;A0A8I6XWW8;A1XXI9;F2CPL2;F2DAR0;F2DXX0;F2E4I7;F2EF30;Q43488;T1TD43
GO:1901566	organonitrogen compound biosynthetic process	70	392	0.207636	0.881728	A0A5C1YV39;A0A8I6WB19;A0A8I6WHD1;A0A8I6WKM0;A0A8I6WQV8;A0A8I6WWJ7;A0A8I6X6B1;A0A8I6XD03;A0A8I6XEF6;A0A8I6XFM9;A0A8I6XPB3;A0A8I6XUG0;A0A8I6XWQ1;A0A8I6Y4J8;A0A8I6YFL0;A0A8I6YHI9;A0A8I6YQI6;A0A8I6YQU0;A0A8I6YWJ4;A0A8I6Z9Z3;A0A8I7B4C5;A0A8I7BBH0;A0A8I7BE86;A0A8I7BJR0;F2CQ03;F2CRW7;F2CS15;F2CS23;F2CSX2;F2CT73;F2CVM4;F2CW53;F2CWQ6;F2CZ65;F2CZL7;F2D119;F2D1K5;F2D293;F2D2Y2;F2D483;F2D4K2;F2D558;F2D643;F2…
GO:0006974	cellular response to DNA damage stimulus	12	57	0.209575	0.881728	A0A287EZS0;A0A287U5M5;A0A8I6WDS1;A0A8I6YS17;A0A8I6YZG5;F2CQH9;F2D0W0;F2DC93;F2DHP2;F2DNW4;F2DUJ6;F2ELJ9
GO:0043603	cellular amide metabolic process	49	269	0.211903	0.881728	A0A8I6WB19;A0A8I6WQV8;A0A8I6WT04;A0A8I6XEF6;A0A8I6XQX4;A0A8I6XUG0;A0A8I6XWQ1;A0A8I6YQI6;A0A8I6YWJ4;A0A8I6Z9Z3;A0A8I7B654;A0A8I7BE86;F2CQ03;F2CRW7;F2CS15;F2CS23;F2CSX2;F2CT73;F2CVM4;F2CZ65;F2CZL7;F2D1K5;F2D293;F2D2Y2;F2D483;F2D4K2;F2D558;F2D6M6;F2D702;F2D788;F2DAK3;F2DFA6;F2DHN5;F2DIR3;F2DR63;F2DXB7;F2DXD4;F2DYM4;F2E556;F2E5S3;F2E941;F2ECK7;F2EDT9;F2EFR1;F2EFV3;F2EG94;F2EIG1;M0XNG3;Q9XHS0
GO:0051028	mRNA transport	6	25	0.213193	0.881728	A0A287Q7U2;A0A8I6YEZ5;A0A8I6YLT8;F2D6G3;F2D8K0;F2E4I7
GO:0009808	lignin metabolic process	3	10	0.215317	0.881728	F2CPM4;F2E7V8;W8E7E3
GO:0009314	response to radiation	5	20	0.217879	0.881728	A0A8I6XCP7;A0A8I7B3E6;F2CPL2;F2DSZ9;Q673G6
GO:0009416	response to light stimulus	5	20	0.217879	0.881728	A0A8I6XCP7;A0A8I7B3E6;F2CPL2;F2DSZ9;Q673G6
GO:0009605	response to external stimulus	11	52	0.218408	0.881728	A0A8I6XCP7;A0A8I6XTL4;A0A8I7BCT1;F2CQV7;F2DE94;F2DGM5;F2DHZ5;F2E0P9;F2E3X1;F2EGM1;M0WNW4
GO:0006464	cellular protein modification process	18	91	0.219644	0.881728	A0A8I6X0M9;A0A8I6X7M2;A0A8I6X7Q6;A0A8I6XH22;A0A8I6XH57;A0A8I6XJN9;A0A8I6XRV2;A0A8I6YHZ7;A0A8I6YIV5;A0A8I6YNI8;A0A8I6YUS4;A0A8I7BF02;A0A8I7BII2;F2CQH9;F2CW55;F2D7S9;F2DZF2;F2E3I5
GO:0032511	late endosome to vacuole transport via multivesicular body sorting pathway	4	15	0.219897	0.881728	A0A287NWK0;F2CT83;F2D2Z9;F2DA66
GO:0006979	response to oxidative stress	16	80	0.223203	0.881728	A0A287PY01;A0A8I6WHE5;A0A8I6XJF2;A0A8I6XTB9;A0A8I6Y4Z6;A0A8I6YHJ3;A0A8I6YXG5;A0A8I7B995;F2CPL2;F2CQX6;F2CRR9;F2CU44;F2CZC9;F2D9U3;Q38JE4;Q7XZK3
GO:0050794	regulation of cellular process	50	277	0.230221	0.881728	A0A287EZV5;A0A287FP91;A0A287FZ34;A0A8I6WDS1;A0A8I6WHE5;A0A8I6WV37;A0A8I6WXW1;A0A8I6X017;A0A8I6XBH2;A0A8I6XCP7;A0A8I6XDB4;A0A8I6XEF6;A0A8I6XEP9;A0A8I6XJN9;A0A8I6XTB9;A0A8I6Y5Z0;A0A8I6YIV5;A0A8I6YL06;A0A8I6Z0S4;A0A8I6Z4M3;A0A8I6Z9Z3;A0A8I7B2K7;A0A8I7BE86;A1X810;A1XXI9;F2CPL2;F2CQ03;F2CQX6;F2CRG7;F2CRK1;F2CT56;F2CTS1;F2CWF3;F2D6M6;F2D7S9;F2DAR0;F2DC93;F2DS97;F2DSZ9;F2DXG7;F2DZF2;F2DZN2;F2E3M7;F2E3X1…
GO:0000302	response to reactive oxygen species	7	31	0.232894	0.881728	A0A8I6XJF2;A0A8I6YXG5;A0A8I7B995;F2CPL2;F2CQX6;F2CU44;Q38JE4
GO:0006006	glucose metabolic process	7	31	0.232894	0.881728	A0A287ILG2;A0A3S9KBF3;A0A8I6YK25;F2CQV1;F2CU23;F2CW03;F2DEG9
GO:0007034	vacuolar transport	7	31	0.232894	0.881728	A0A287NWK0;A0A8I6WHM6;A0A8I6YC75;F2CT83;F2D2Z9;F2DA66;F2DP42
GO:0006259	DNA metabolic process	13	64	0.236108	0.881728	A0A287EZS0;A0A287U5M5;A0A8I6WDS1;A0A8I6WV37;A0A8I6YL06;A0A8I6YS17;A0A8I6YZG5;F2CQH9;F2D0W0;F2DNW4;F2DUJ6;F2EHE1;F2ELJ9
GO:0055085	transmembrane transport	13	64	0.236108	0.881728	A0A8I6WF91;A0A8I6WIA9;A0A8I6Y690;F2CV17;F2CWF3;F2CWN4;F2CWQ6;F2CXT5;F2DG80;F2DIG1;F2DJJ2;F2DXG7;F2E405
GO:0051276	chromosome organization	9	42	0.237677	0.881728	A0A287U5M5;A0A8I6WV37;A0A8I6XJN9;A0A8I6YL06;A0A8I6YZG5;F2CUP3;F2DNW4;F2EHE1;M0Y7Q2
GO:0034470	ncRNA processing	11	53	0.238019	0.881728	A0A8I6X472;A0A8I6XD40;A0A8I6YSL3;F2CQY5;F2CRA3;F2CS23;F2D483;F2DDD5;F2E0C0;F2E556;F2EG94
GO:0042592	homeostatic process	10	48	0.248864	0.881728	A0A8I6WHE5;A0A8I6WKG3;A0A8I6XBH2;A0A8I6XQR9;A0A8I6XTB9;A0A8I6YMC3;F2CQX6;F2CRK6;F2CW03;F2D2S2
GO:0000070	mitotic sister chromatid segregation	2	6	0.255183	0.881728	A0A8I6XJN9;F2DNW4
GO:0006367	transcription initiation from RNA polymerase II promoter	2	6	0.255183	0.881728	A0A8I6XEM6;F2ECG8
GO:0006896	Golgi to vacuole transport	2	6	0.255183	0.881728	A0A8I6WHM6;A0A8I6YC75
GO:0009685	gibberellin metabolic process	2	6	0.255183	0.881728	F2DZK7;Q673G6
GO:0009809	lignin biosynthetic process	2	6	0.255183	0.881728	F2CPM4;F2E7V8
GO:0010038	response to metal ion	2	6	0.255183	0.881728	A0A8I6WWC5;F2CPL2
GO:0042537	benzene-containing compound metabolic process	2	6	0.255183	0.881728	A0A8I6WT14;A0A8I6YTX6
GO:0044770	cell cycle phase transition	2	6	0.255183	0.881728	A0A8I6WDS1;A0A8I6XJN9
GO:0044772	mitotic cell cycle phase transition	2	6	0.255183	0.881728	A0A8I6WDS1;A0A8I6XJN9
GO:0046292	formaldehyde metabolic process	2	6	0.255183	0.881728	A0A8I6X6J9;F2D005
GO:0046294	formaldehyde catabolic process	2	6	0.255183	0.881728	A0A8I6X6J9;F2D005
GO:0070646	protein modification by small protein removal	2	6	0.255183	0.881728	A0A8I6X7Q6;A0A8I6YUS4
GO:0006414	translational elongation	4	16	0.258073	0.881728	A0A8I6XEF6;A0A8I6XUG0;F2D2Y2;F2DXB7
GO:0006487	protein N-linked glycosylation	4	16	0.258073	0.881728	A0A8I6XH22;A0A8I6XH57;A0A8I6XRV2;A0A8I7BII2
GO:1901700	response to oxygen-containing compound	20	105	0.258114	0.881728	A0A8I6WGX0;A0A8I6XJF2;A0A8I6XWW8;A0A8I6YXG5;A0A8I7B995;A1XXI9;F2CPL2;F2CQX6;F2CU44;F2CVB4;F2D7S9;F2DAR0;F2DGM5;F2DSZ9;F2DXX0;F2E4I7;F2EF30;Q38JE4;Q43488;T1TD43
GO:0015931	nucleobase-containing compound transport	7	32	0.259442	0.881728	A0A287Q7U2;A0A8I6YEZ5;A0A8I6YLT8;F2D6G3;F2D8K0;F2DG80;F2E4I7
GO:0022904	respiratory electron transport chain	7	32	0.259442	0.881728	A0A8I6WTI3;A0A8I6YH05;F2CT87;F2D7B2;F2DMM2;F2E2B0;F2EL27
GO:0016050	vesicle organization	9	43	0.260515	0.881728	A0A8I6WMI1;A0A8I6WTQ8;A0A8I6X8X0;F2CT83;F2D2Z9;F2DA66;F2DRI5;F2DVS7;F2E298
GO:0005977	glycogen metabolic process	3	11	0.262469	0.881728	A0A2P1AB13;A0A8I7BFU9;C3W8L3
GO:0006112	energy reserve metabolic process	3	11	0.262469	0.881728	A0A2P1AB13;A0A8I7BFU9;C3W8L3
GO:0006760	folic acid-containing compound metabolic process	3	11	0.262469	0.881728	A0A8I6XQX4;A0A8I6YWJ4;F2DYM4
GO:0042558	pteridine-containing compound metabolic process	3	11	0.262469	0.881728	A0A8I6XQX4;A0A8I6YWJ4;F2DYM4
GO:0051052	regulation of DNA metabolic process	3	11	0.262469	0.881728	A0A8I6WV37;A0A8I6YL06;F2EHE1
GO:0010467	gene expression	81	465	0.262782	0.881728	A0A8I6WB19;A0A8I6WFJ6;A0A8I6WQV8;A0A8I6X472;A0A8I6XCP7;A0A8I6XD40;A0A8I6XDB4;A0A8I6XEF6;A0A8I6XEM6;A0A8I6XEW3;A0A8I6XF02;A0A8I6XQQ9;A0A8I6XUG0;A0A8I6XWQ1;A0A8I6Y6M4;A0A8I6YLT8;A0A8I6YSL3;A0A8I6YVL6;A0A8I6Z4M3;A0A8I6Z9Z3;A0A8I7B3E6;A0A8I7B654;A0A8I7BE86;A0A8I7BEI9;A1XXI9;F2CQ03;F2CQY5;F2CRA3;F2CRW7;F2CS15;F2CS23;F2CSX2;F2CT73;F2CVM4;F2CXL5;F2CXT5;F2CZ65;F2CZL7;F2D1K5;F2D205;F2D293;F2D2Y2;F2D3D5;F2…
GO:0050896	response to stimulus	87	501	0.263481	0.881728	A0A287EZS0;A0A287EZV5;A0A287FP91;A0A287FZ34;A0A287PY01;A0A287U5M5;A0A8I6WDS1;A0A8I6WGX0;A0A8I6WHE5;A0A8I6WWC5;A0A8I6WXW1;A0A8I6X017;A0A8I6XCP7;A0A8I6XJF2;A0A8I6XTB9;A0A8I6XTL4;A0A8I6XWW8;A0A8I6Y4Z6;A0A8I6Y5Z0;A0A8I6YHJ3;A0A8I6YIV5;A0A8I6YS17;A0A8I6YT49;A0A8I6YXG5;A0A8I6YZG5;A0A8I6Z0S4;A0A8I6Z4M3;A0A8I6Z7J9;A0A8I6Z9Z3;A0A8I7B2K7;A0A8I7B3E6;A0A8I7B6N5;A0A8I7B995;A0A8I7BCT1;A0A8I7BII4;A1X810;A1XXI9;…
GO:0034660	ncRNA metabolic process	16	83	0.272109	0.881728	A0A8I6WQV8;A0A8I6X472;A0A8I6XD40;A0A8I6YSL3;F2CQY5;F2CRA3;F2CS23;F2D483;F2DDD5;F2E0C0;F2E556;F2E5S3;F2E941;F2EFV3;F2EG94;M0XNG3
GO:0043207	response to external biotic stimulus	8	38	0.273104	0.881728	A0A8I6XTL4;A0A8I7BCT1;F2CQV7;F2DE94;F2DGM5;F2DHZ5;F2EGM1;M0WNW4
GO:0051707	response to other organism	8	38	0.273104	0.881728	A0A8I6XTL4;A0A8I7BCT1;F2CQV7;F2DE94;F2DGM5;F2DHZ5;F2EGM1;M0WNW4
GO:0006767	water-soluble vitamin metabolic process	5	22	0.284093	0.881728	A0A8I6YQI6;A0A8I6YQU0;F2DR63;F2DYM4;F2EDT9
GO:0006869	lipid transport	5	22	0.284093	0.881728	F2CWC9;F2D9V7;F2DGM5;F2EEH9;Q5UNP2
GO:0034220	ion transmembrane transport	5	22	0.284093	0.881728	F2CWF3;F2CWQ6;F2DG80;F2DJJ2;F2DXG7
GO:0051604	protein maturation	5	22	0.284093	0.881728	A0A8I6YVL6;A0A8I7B654;F2CXT5;F2D5L4;F2E4D2
GO:0071822	protein complex subunit organization	24	130	0.285044	0.881728	A0A287U5M5;A0A8I6WMI1;A0A8I6WV37;A0A8I6X0M9;A0A8I6X7Q6;A0A8I6XBL4;A0A8I6XEF6;A0A8I6XJF2;A0A8I6Y871;A0A8I6YKQ7;A0A8I6YL06;A0A8I6YZG5;A0A8I6ZA75;A0A8I7B995;F2CRK1;F2CU44;F2CUP3;F2CX02;F2DK52;F2E2M2;F2E4D2;F2ECG8;F2ED67;F2EHE1
GO:0006220	pyrimidine nucleotide metabolic process	4	17	0.29741	0.881728	A0A8I6WHD1;A0A8I6WKM0;A0A8I7BBH0;F2EIL0
GO:0006221	pyrimidine nucleotide biosynthetic process	4	17	0.29741	0.881728	A0A8I6WHD1;A0A8I6WKM0;A0A8I7BBH0;F2EIL0
GO:0009631	cold acclimation	4	17	0.29741	0.881728	A0A8I6XWW8;F2EF30;Q43488;T1TD43
GO:0000077	DNA damage checkpoint	1	2	0.300088	0.881728	A0A8I6WDS1
GO:0000122	negative regulation of transcription from RNA polymerase II promoter	1	2	0.300088	0.881728	M0Y7Q2
GO:0000461	endonucleolytic cleavage to generate mature 3'-end of SSU-rRNA from (SSU-rRNA, 5.8S rRNA, LSU-rRNA)	1	2	0.300088	0.881728	F2CS23
GO:0001561	fatty acid alpha-oxidation	1	2	0.300088	0.881728	F2DHZ5
GO:0003008	system process	1	2	0.300088	0.881728	A0A8I6XBH2
GO:0003013	circulatory system process	1	2	0.300088	0.881728	A0A8I6XBH2
GO:0006226	dUMP biosynthetic process	1	2	0.300088	0.881728	A0A8I7BBH0
GO:0006244	pyrimidine nucleotide catabolic process	1	2	0.300088	0.881728	A0A8I7BBH0
GO:0006368	transcription elongation from RNA polymerase II promoter	1	2	0.300088	0.881728	F2EJZ7
GO:0006424	glutamyl-tRNA aminoacylation	1	2	0.300088	0.881728	M0XNG3
GO:0006434	seryl-tRNA aminoacylation	1	2	0.300088	0.881728	F2E941
GO:0006569	tryptophan catabolic process	1	2	0.300088	0.881728	A0A8I6YTX6
GO:0006692	prostanoid metabolic process	1	2	0.300088	0.881728	M0YR50
GO:0006693	prostaglandin metabolic process	1	2	0.300088	0.881728	M0YR50
GO:0006787	porphyrin-containing compound catabolic process	1	2	0.300088	0.881728	F2DC91
GO:0006813	potassium ion transport	1	2	0.300088	0.881728	F2CWF3
GO:0006848	pyruvate transport	1	2	0.300088	0.881728	A0A8I7B3D9
GO:0006850	mitochondrial pyruvate transport	1	2	0.300088	0.881728	A0A8I7B3D9
GO:0007219	Notch signaling pathway	1	2	0.300088	0.881728	F2CRG7
GO:0007265	Ras protein signal transduction	1	2	0.300088	0.881728	A0A8I7B2K7
GO:0008015	blood circulation	1	2	0.300088	0.881728	A0A8I6XBH2
GO:0008643	carbohydrate transport	1	2	0.300088	0.881728	F2DG80
GO:0009061	anaerobic respiration	1	2	0.300088	0.881728	F2EL27
GO:0009094	L-phenylalanine biosynthetic process	1	2	0.300088	0.881728	A0A8I6YHI9
GO:0009149	pyrimidine nucleoside triphosphate catabolic process	1	2	0.300088	0.881728	A0A8I7BBH0
GO:0009157	deoxyribonucleoside monophosphate biosynthetic process	1	2	0.300088	0.881728	A0A8I7BBH0
GO:0009162	deoxyribonucleoside monophosphate metabolic process	1	2	0.300088	0.881728	A0A8I7BBH0
GO:0009176	pyrimidine deoxyribonucleoside monophosphate metabolic process	1	2	0.300088	0.881728	A0A8I7BBH0
GO:0009177	pyrimidine deoxyribonucleoside monophosphate biosynthetic process	1	2	0.300088	0.881728	A0A8I7BBH0
GO:0009213	pyrimidine deoxyribonucleoside triphosphate catabolic process	1	2	0.300088	0.881728	A0A8I7BBH0
GO:0009223	pyrimidine deoxyribonucleotide catabolic process	1	2	0.300088	0.881728	A0A8I7BBH0
GO:0009264	deoxyribonucleotide catabolic process	1	2	0.300088	0.881728	A0A8I7BBH0
GO:0009310	amine catabolic process	1	2	0.300088	0.881728	A0A8I6YTX6
GO:0009694	jasmonic acid metabolic process	1	2	0.300088	0.881728	A0A8I6WT14
GO:0009718	anthocyanin-containing compound biosynthetic process	1	2	0.300088	0.881728	F2DSZ9
GO:0009735	response to cytokinin	1	2	0.300088	0.881728	A0A8I6WXW1
GO:0009736	cytokinin-activated signaling pathway	1	2	0.300088	0.881728	A0A8I6WXW1
GO:0009865	pollen tube adhesion	1	2	0.300088	0.881728	A0A8I6XBD2
GO:0010017	red or far-red light signaling pathway	1	2	0.300088	0.881728	A0A8I6XCP7
GO:0010207	photosystem II assembly	1	2	0.300088	0.881728	F2CRK1
GO:0010265	SCF complex assembly	1	2	0.300088	0.881728	A0A8I6X0M9
GO:0010496	intercellular transport	1	2	0.300088	0.881728	Q7XZK3
GO:0010497	plasmodesmata-mediated intercellular transport	1	2	0.300088	0.881728	Q7XZK3
GO:0010563	negative regulation of phosphorus metabolic process	1	2	0.300088	0.881728	F2DZF2
GO:0010972	negative regulation of G2/M transition of mitotic cell cycle	1	2	0.300088	0.881728	A0A8I6WDS1
GO:0015939	pantothenate metabolic process	1	2	0.300088	0.881728	F2DR63
GO:0015940	pantothenate biosynthetic process	1	2	0.300088	0.881728	F2DR63
GO:0019441	tryptophan catabolic process to kynurenine	1	2	0.300088	0.881728	A0A8I6YTX6
GO:0019516	lactate oxidation	1	2	0.300088	0.881728	F2DHZ5
GO:0030030	cell projection organization	1	2	0.300088	0.881728	F2E3M7
GO:0031146	SCF-dependent proteasomal ubiquitin-dependent protein catabolic process	1	2	0.300088	0.881728	F2D7S9
GO:0031175	neuron projection development	1	2	0.300088	0.881728	F2E3M7
GO:0031468	nuclear envelope reassembly	1	2	0.300088	0.881728	A0A8I7B6R2
GO:0031570	DNA integrity checkpoint	1	2	0.300088	0.881728	A0A8I6WDS1
GO:0032011	ARF protein signal transduction	1	2	0.300088	0.881728	A0A8I7B2K7
GO:0032012	regulation of ARF protein signal transduction	1	2	0.300088	0.881728	A0A8I7B2K7
GO:0032844	regulation of homeostatic process	1	2	0.300088	0.881728	A0A8I6XBH2
GO:0033015	tetrapyrrole catabolic process	1	2	0.300088	0.881728	F2DC91
GO:0034243	regulation of transcription elongation from RNA polymerase II promoter	1	2	0.300088	0.881728	F2EJZ7
GO:0034614	cellular response to reactive oxygen species	1	2	0.300088	0.881728	F2CQX6
GO:0035303	regulation of dephosphorylation	1	2	0.300088	0.881728	F2DZF2
GO:0035964	COPI-coated vesicle budding	1	2	0.300088	0.881728	A0A8I6WTQ8
GO:0036258	multivesicular body assembly	1	2	0.300088	0.881728	F2DVS7
GO:0042402	cellular biogenic amine catabolic process	1	2	0.300088	0.881728	A0A8I6YTX6
GO:0042436	indole-containing compound catabolic process	1	2	0.300088	0.881728	A0A8I6YTX6
GO:0044571	[2Fe-2S] cluster assembly	1	2	0.300088	0.881728	F2E4D2
GO:0044773	mitotic DNA damage checkpoint	1	2	0.300088	0.881728	A0A8I6WDS1
GO:0044774	mitotic DNA integrity checkpoint	1	2	0.300088	0.881728	A0A8I6WDS1
GO:0044818	mitotic G2/M transition checkpoint	1	2	0.300088	0.881728	A0A8I6WDS1
GO:0045041	protein import into mitochondrial intermembrane space	1	2	0.300088	0.881728	F2CXT5
GO:0045936	negative regulation of phosphate metabolic process	1	2	0.300088	0.881728	F2DZF2
GO:0046078	dUMP metabolic process	1	2	0.300088	0.881728	A0A8I7BBH0
GO:0046080	dUTP metabolic process	1	2	0.300088	0.881728	A0A8I7BBH0
GO:0046081	dUTP catabolic process	1	2	0.300088	0.881728	A0A8I7BBH0
GO:0046218	indolalkylamine catabolic process	1	2	0.300088	0.881728	A0A8I6YTX6
GO:0046283	anthocyanin-containing compound metabolic process	1	2	0.300088	0.881728	F2DSZ9
GO:0046386	deoxyribose phosphate catabolic process	1	2	0.300088	0.881728	A0A8I7BBH0
GO:0046578	regulation of Ras protein signal transduction	1	2	0.300088	0.881728	A0A8I7B2K7
GO:0046656	folic acid biosynthetic process	1	2	0.300088	0.881728	F2DYM4
GO:0046839	phospholipid dephosphorylation	1	2	0.300088	0.881728	A0A8I6YMC3
GO:0046949	fatty-acyl-CoA biosynthetic process	1	2	0.300088	0.881728	A0A5C1YV39
GO:0048194	Golgi vesicle budding	1	2	0.300088	0.881728	A0A8I6WTQ8
GO:0048200	Golgi transport vesicle coating	1	2	0.300088	0.881728	A0A8I6WTQ8
GO:0048205	COPI coating of Golgi vesicle	1	2	0.300088	0.881728	A0A8I6WTQ8
GO:0048666	neuron development	1	2	0.300088	0.881728	F2E3M7
GO:0051017	actin filament bundle assembly	1	2	0.300088	0.881728	A0A8I6YKQ7
GO:0051056	regulation of small GTPase mediated signal transduction	1	2	0.300088	0.881728	A0A8I7B2K7
GO:0051187	cofactor catabolic process	1	2	0.300088	0.881728	F2DC91
GO:0061572	actin filament bundle organization	1	2	0.300088	0.881728	A0A8I6YKQ7
GO:0070070	proton-transporting V-type ATPase complex assembly	1	2	0.300088	0.881728	F2ED67
GO:0070071	proton-transporting two-sector ATPase complex assembly	1	2	0.300088	0.881728	F2ED67
GO:0070072	vacuolar proton-transporting V-type ATPase complex assembly	1	2	0.300088	0.881728	F2ED67
GO:0070189	kynurenine metabolic process	1	2	0.300088	0.881728	A0A8I6YTX6
GO:0070676	intralumenal vesicle formation	1	2	0.300088	0.881728	F2DVS7
GO:0071368	cellular response to cytokinin stimulus	1	2	0.300088	0.881728	A0A8I6WXW1
GO:0071489	cellular response to red or far red light	1	2	0.300088	0.881728	A0A8I6XCP7
GO:0090522	vesicle tethering involved in exocytosis	1	2	0.300088	0.881728	A0A8I6ZAC4
GO:0098740	multi organism cell adhesion	1	2	0.300088	0.881728	A0A8I6XBD2
GO:0098869	cellular oxidant detoxification	1	2	0.300088	0.881728	F2CQX6
GO:1900034	regulation of cellular response to heat	1	2	0.300088	0.881728	F2CPL2
GO:1902074	response to salt	1	2	0.300088	0.881728	F2CPL2
GO:1902223	erythrose 4-phosphate/phosphoenolpyruvate family amino acid biosynthetic process	1	2	0.300088	0.881728	A0A8I6YHI9
GO:1902750	negative regulation of cell cycle G2/M phase transition	1	2	0.300088	0.881728	A0A8I6WDS1
GO:1903189	glyoxal metabolic process	1	2	0.300088	0.881728	F2CUF4
GO:1990114	RNA Polymerase II core complex assembly	1	2	0.300088	0.881728	F2ECG8
GO:1990748	cellular detoxification	1	2	0.300088	0.881728	F2CQX6
GO:2000021	regulation of ion homeostasis	1	2	0.300088	0.881728	A0A8I6XBH2
GO:0033554	cellular response to stress	25	137	0.301183	0.881728	A0A287EZS0;A0A287U5M5;A0A8I6WDS1;A0A8I6WHE5;A0A8I6XTB9;A0A8I6Y5Z0;A0A8I6YS17;A0A8I6YT49;A0A8I6YXG5;A0A8I6YZG5;F2CPL2;F2CQH9;F2CQX6;F2D0W0;F2D9U3;F2DAW4;F2DC93;F2DHP2;F2DNW4;F2DQH1;F2DUJ6;F2E0P9;F2E3X1;F2EFK9;F2ELJ9
GO:0070647	protein modification by small protein conjugation or removal	12	62	0.306665	0.881728	A0A8I6X0M9;A0A8I6X7M2;A0A8I6X7Q6;A0A8I6XJN9;A0A8I6YHZ7;A0A8I6YNI8;A0A8I6YUS4;A0A8I7BF02;F2CQH9;F2CW55;F2D7S9;F2E3I5
GO:0009607	response to biotic stimulus	9	45	0.30806	0.881728	A0A8I6XTL4;A0A8I7BCT1;A0A8I7BII4;F2CQV7;F2DE94;F2DGM5;F2DHZ5;F2EGM1;M0WNW4
GO:0010605	negative regulation of macromolecule metabolic process	9	45	0.30806	0.881728	A0A8I6WV37;A0A8I6XJN9;A0A8I6YL06;A0A8I6Z9Z3;F2CQ03;F2D6M6;F2DZF2;F2EHE1;M0Y7Q2
GO:0006810	transport	71	411	0.309491	0.881728	A0A287FZ34;A0A287LRJ1;A0A287NWK0;A0A287Q7U2;A0A8I6WF91;A0A8I6WHM6;A0A8I6WIA9;A0A8I6WIT4;A0A8I6WMI1;A0A8I6WTJ0;A0A8I6WTQ8;A0A8I6X017;A0A8I6X0Z2;A0A8I6X2Y8;A0A8I6X8X0;A0A8I6XB86;A0A8I6XBH2;A0A8I6XEC2;A0A8I6XLR3;A0A8I6XNN7;A0A8I6XZV6;A0A8I6Y690;A0A8I6YC75;A0A8I6YEZ5;A0A8I6YLT8;A0A8I6YXG1;A0A8I6Z7P9;A0A8I6ZAC4;A0A8I7B2K7;A0A8I7B3D9;A0A8I7B654;F2CRN1;F2CT83;F2CV17;F2CV36;F2CWB3;F2CWC9;F2CWF3;F2CWN4;F2…
GO:0006553	lysine metabolic process	3	12	0.310711	0.881728	A0A8I6WWJ7;A0A8I6XPB3;F2D643
GO:0006887	exocytosis	3	12	0.310711	0.881728	A0A8I6X0Z2;A0A8I6YXG1;A0A8I6ZAC4
GO:0009451	RNA modification	3	12	0.310711	0.881728	A0A8I6X472;F2CQY5;F2DDD5
GO:0019252	starch biosynthetic process	3	12	0.310711	0.881728	A0A2P1AB13;A0A8I7BFU9;C3W8L3
GO:0031647	regulation of protein stability	3	12	0.310711	0.881728	A0A8I6YT49;A0A8I7B2U1;A0A8I7B659
GO:0044703	multi-organism reproductive process	3	12	0.310711	0.881728	A0A8I6WJN4;A0A8I6XBD2;F2E3X1
GO:0045454	cell redox homeostasis	3	12	0.310711	0.881728	A0A8I6WHE5;A0A8I6XTB9;F2CQX6
GO:0046185	aldehyde catabolic process	3	12	0.310711	0.881728	A0A8I6X6J9;A0A8I6XQ26;F2D005
GO:0055114	oxidation-reduction process	23	126	0.311088	0.881728	A0A2P1AB13;A0A8I6WGG3;A0A8I6WTI3;A0A8I6XCQ2;A0A8I6XFM0;A0A8I6XRG5;A0A8I6XUQ8;A0A8I6YH05;A0A8I7BFU9;C3W8L3;F2CT87;F2D1C6;F2D7B2;F2DC91;F2DHZ5;F2DMM2;F2DS63;F2DUI2;F2DZK7;F2E2B0;F2E5P4;F2EL27;Q8SA48
GO:0072329	monocarboxylic acid catabolic process	7	34	0.314799	0.881728	A0A8I6XCQ2;A0A8I6XRG5;A0A8I6XUQ8;A0A8I6Z0L1;F2D1C6;F2DHZ5;F2DSA8
GO:0034599	cellular response to oxidative stress	5	23	0.31854	0.881728	A0A8I6WHE5;A0A8I6XTB9;A0A8I6YXG5;F2CQX6;F2D9U3
GO:0051301	cell division	5	23	0.31854	0.881728	A0A8I6XJN9;A0A8I6YIV5;F2D4P0;F2DNW4;F2DUR4
GO:0009141	nucleoside triphosphate metabolic process	15	80	0.320794	0.881728	A0A8I6WHD1;A0A8I6WTI3;A0A8I6XBW8;A0A8I6YH05;A0A8I7BBH0;A0A8I7BCM2;F2CQV1;F2CT87;F2CW03;F2CWQ6;F2D7B2;F2DJJ2;F2DMM2;F2E2B0;F2EL27
GO:0000819	sister chromatid segregation	2	7	0.320893	0.881728	A0A8I6XJN9;F2DNW4
GO:0006352	DNA-templated transcription, initiation	2	7	0.320893	0.881728	A0A8I6XEM6;F2ECG8
GO:0006754	ATP biosynthetic process	2	7	0.320893	0.881728	F2CWQ6;F2DJJ2
GO:0006885	regulation of pH	2	7	0.320893	0.881728	A0A8I6XQR9;F2CRK6
GO:0009699	phenylpropanoid biosynthetic process	2	7	0.320893	0.881728	F2CPM4;F2E7V8
GO:0010564	regulation of cell cycle process	2	7	0.320893	0.881728	A0A8I6WDS1;A0A8I6XJN9
GO:0015985	energy coupled proton transport, down electrochemical gradient	2	7	0.320893	0.881728	F2CWQ6;F2DJJ2
GO:0015986	ATP synthesis coupled proton transport	2	7	0.320893	0.881728	F2CWQ6;F2DJJ2
GO:0016101	diterpenoid metabolic process	2	7	0.320893	0.881728	F2DZK7;Q673G6
GO:0016311	dephosphorylation	2	7	0.320893	0.881728	A0A8I6YMC3;F2DZF2
GO:0030004	cellular monovalent inorganic cation homeostasis	2	7	0.320893	0.881728	A0A8I6XQR9;F2CRK6
GO:0030641	regulation of cellular pH	2	7	0.320893	0.881728	A0A8I6XQR9;F2CRK6
GO:0042445	hormone metabolic process	2	7	0.320893	0.881728	A0A8I6WT04;A0A8I7BAE7
GO:0043628	ncRNA 3'-end processing	2	7	0.320893	0.881728	F2CS23;F2DDD5
GO:0051130	positive regulation of cellular component organization	2	7	0.320893	0.881728	A0A8I6XEF6;M0XN08
GO:0051453	regulation of intracellular pH	2	7	0.320893	0.881728	A0A8I6XQR9;F2CRK6
GO:0055067	monovalent inorganic cation homeostasis	2	7	0.320893	0.881728	A0A8I6XQR9;F2CRK6
GO:0098813	nuclear chromosome segregation	2	7	0.320893	0.881728	A0A8I6XJN9;F2DNW4
GO:0010035	response to inorganic substance	11	57	0.322083	0.883395	A0A8I6WWC5;A0A8I6XJF2;A0A8I6XWW8;A0A8I7B995;F2CPL2;F2CQX6;F2CU44;F2CVB4;F2EF30;Q43488;T1TD43
GO:0022900	electron transport chain	8	40	0.324713	0.888997	A0A8I6WTI3;A0A8I6YH05;F2CT87;F2D7B2;F2DMM2;F2E2B0;F2E5P4;F2EL27
GO:0001101	response to acid chemical	12	63	0.327442	0.89003	A0A8I6WGX0;A0A8I6XWW8;A1XXI9;F2CPL2;F2D7S9;F2DAR0;F2DGM5;F2DXX0;F2E4I7;F2EF30;Q43488;T1TD43
GO:0006351	transcription, DNA-templated	12	63	0.327442	0.89003	A0A8I6XCP7;A0A8I6XDB4;A0A8I6XEM6;A0A8I6Z4M3;A0A8I7B3E6;A0A8I7BEI9;A1XXI9;F2DUE6;F2ECG8;F2EHE1;F2EJZ7;M0Y7Q2
GO:0032774	RNA biosynthetic process	12	63	0.327442	0.89003	A0A8I6XCP7;A0A8I6XDB4;A0A8I6XEM6;A0A8I6Z4M3;A0A8I7B3E6;A0A8I7BEI9;A1XXI9;F2DUE6;F2ECG8;F2EHE1;F2EJZ7;M0Y7Q2
GO:0097659	nucleic acid-templated transcription	12	63	0.327442	0.89003	A0A8I6XCP7;A0A8I6XDB4;A0A8I6XEM6;A0A8I6Z4M3;A0A8I7B3E6;A0A8I7BEI9;A1XXI9;F2DUE6;F2ECG8;F2EHE1;F2EJZ7;M0Y7Q2
GO:0046034	ATP metabolic process	13	69	0.332011	0.896062	A0A8I6WTI3;A0A8I6XBW8;A0A8I6YH05;A0A8I7BCM2;F2CQV1;F2CT87;F2CW03;F2CWQ6;F2D7B2;F2DJJ2;F2DMM2;F2E2B0;F2EL27
GO:0009892	negative regulation of metabolic process	9	46	0.332548	0.896062	A0A8I6WV37;A0A8I6XJN9;A0A8I6YL06;A0A8I6Z9Z3;F2CQ03;F2D6M6;F2DZF2;F2EHE1;M0Y7Q2
GO:0050657	nucleic acid transport	6	29	0.332863	0.896062	A0A287Q7U2;A0A8I6YEZ5;A0A8I6YLT8;F2D6G3;F2D8K0;F2E4I7
GO:0050658	RNA transport	6	29	0.332863	0.896062	A0A287Q7U2;A0A8I6YEZ5;A0A8I6YLT8;F2D6G3;F2D8K0;F2E4I7
GO:0051236	establishment of RNA localization	6	29	0.332863	0.896062	A0A287Q7U2;A0A8I6YEZ5;A0A8I6YLT8;F2D6G3;F2D8K0;F2E4I7
GO:0044085	cellular component biogenesis	48	276	0.33426	0.896062	A0A0U2GJJ3;A0A0U2GJL1;A0A287U5M5;A0A8I6WMI1;A0A8I6WV37;A0A8I6X0M9;A0A8I6X1I1;A0A8I6X472;A0A8I6X7Q6;A0A8I6XBL4;A0A8I6XD40;A0A8I6XEM6;A0A8I6XEW3;A0A8I6XJF2;A0A8I6XWQ1;A0A8I6YIK8;A0A8I6YKQ7;A0A8I6YL06;A0A8I6YSL3;A0A8I6YZG5;A0A8I6ZA75;A0A8I7B6R2;A0A8I7B995;F2CQY5;F2CRA3;F2CRK1;F2CS23;F2CU44;F2CUP3;F2CX02;F2D483;F2D5L4;F2D6M6;F2D702;F2D788;F2DDD5;F2DFA6;F2DIP6;F2DK52;F2DVS7;F2DXD4;F2E0C0;F2E4D2;F2E556…
GO:0051234	establishment of localization	71	414	0.335272	0.896062	A0A287FZ34;A0A287LRJ1;A0A287NWK0;A0A287Q7U2;A0A8I6WF91;A0A8I6WHM6;A0A8I6WIA9;A0A8I6WIT4;A0A8I6WMI1;A0A8I6WTJ0;A0A8I6WTQ8;A0A8I6X017;A0A8I6X0Z2;A0A8I6X2Y8;A0A8I6X8X0;A0A8I6XB86;A0A8I6XBH2;A0A8I6XEC2;A0A8I6XLR3;A0A8I6XNN7;A0A8I6XZV6;A0A8I6Y690;A0A8I6YC75;A0A8I6YEZ5;A0A8I6YLT8;A0A8I6YXG1;A0A8I6Z7P9;A0A8I6ZAC4;A0A8I7B2K7;A0A8I7B3D9;A0A8I7B654;F2CRN1;F2CT83;F2CV17;F2CV36;F2CWB3;F2CWC9;F2CWF3;F2CWN4;F2…
GO:0065007	biological regulation	67	390	0.335656	0.896062	A0A287EZV5;A0A287FP91;A0A287FZ34;A0A8I6WDS1;A0A8I6WHE5;A0A8I6WKG3;A0A8I6WT04;A0A8I6WV37;A0A8I6WXW1;A0A8I6X017;A0A8I6XBH2;A0A8I6XCP7;A0A8I6XDB4;A0A8I6XEF6;A0A8I6XEP9;A0A8I6XJN9;A0A8I6XQR9;A0A8I6XTB9;A0A8I6Y5Z0;A0A8I6YIV5;A0A8I6YL06;A0A8I6YMC3;A0A8I6YT49;A0A8I6Z0S4;A0A8I6Z4M3;A0A8I6Z9Z3;A0A8I7B2K7;A0A8I7B2U1;A0A8I7B659;A0A8I7BAE7;A0A8I7BE86;A1X810;A1XXI9;F2CPL2;F2CQ03;F2CQX6;F2CQY5;F2CRG7;F2CRK1;F2…
GO:0005984	disaccharide metabolic process	4	18	0.337396	0.896062	A0A8I6XI70;A0A8I6XUU4;F2DQH1;Q4A1H2
GO:0022406	membrane docking	4	18	0.337396	0.896062	A0A8I6WF91;A0A8I6ZAC4;F2DRI5;F2E298
GO:0032509	endosome transport via multivesicular body sorting pathway	4	18	0.337396	0.896062	A0A287NWK0;F2CT83;F2D2Z9;F2DA66
GO:0009165	nucleotide biosynthetic process	10	52	0.338894	0.896062	A0A5C1YV39;A0A8I6WHD1;A0A8I6WKM0;A0A8I6X6B1;A0A8I6XD03;A0A8I7BBH0;F2CWQ6;F2D119;F2DJJ2;F2EIL0
GO:1901293	nucleoside phosphate biosynthetic process	10	52	0.338894	0.896062	A0A5C1YV39;A0A8I6WHD1;A0A8I6WKM0;A0A8I6X6B1;A0A8I6XD03;A0A8I7BBH0;F2CWQ6;F2D119;F2DJJ2;F2EIL0
GO:0071840	cellular component organization or biogenesis	90	529	0.339457	0.896062	A0A0U2GJJ3;A0A0U2GJL1;A0A287Q7U2;A0A287U5M5;A0A8I6WF91;A0A8I6WIA9;A0A8I6WMI1;A0A8I6WQV8;A0A8I6WS80;A0A8I6WTQ8;A0A8I6WV37;A0A8I6WWA9;A0A8I6X0M9;A0A8I6X1I1;A0A8I6X2Y8;A0A8I6X472;A0A8I6X7Q6;A0A8I6X8X0;A0A8I6XBL4;A0A8I6XD40;A0A8I6XEF6;A0A8I6XEM6;A0A8I6XEW3;A0A8I6XJF2;A0A8I6XJN9;A0A8I6XUG0;A0A8I6XWQ1;A0A8I6Y180;A0A8I6Y871;A0A8I6YIK8;A0A8I6YKQ7;A0A8I6YL06;A0A8I6YSL3;A0A8I6YZG5;A0A8I6ZA75;A0A8I6ZAC4;A0A…
GO:0006839	mitochondrial transport	7	35	0.343262	0.896062	A0A8I6WIA9;A0A8I6Y690;A0A8I7B3D9;F2CXT5;F2DIG1;F2DJJ2;F2E405
GO:0006518	peptide metabolic process	43	247	0.343479	0.896062	A0A8I6WB19;A0A8I6WQV8;A0A8I6WT04;A0A8I6XEF6;A0A8I6XUG0;A0A8I6XWQ1;A0A8I6Z9Z3;A0A8I7B654;A0A8I7BE86;F2CQ03;F2CRW7;F2CS15;F2CS23;F2CSX2;F2CT73;F2CVM4;F2CZ65;F2CZL7;F2D1K5;F2D293;F2D2Y2;F2D483;F2D4K2;F2D558;F2D6M6;F2D702;F2D788;F2DAK3;F2DFA6;F2DHN5;F2DIR3;F2DXB7;F2DXD4;F2E556;F2E5S3;F2E941;F2ECK7;F2EFR1;F2EFV3;F2EG94;F2EIG1;M0XNG3;Q9XHS0
GO:0019725	cellular homeostasis	8	41	0.351164	0.896062	A0A8I6WHE5;A0A8I6WKG3;A0A8I6XQR9;A0A8I6XTB9;F2CQX6;F2CRK6;F2CW03;F2D2S2
GO:0042254	ribosome biogenesis	13	70	0.352238	0.896062	A0A8I6X472;A0A8I6XD40;A0A8I6YSL3;F2CQY5;F2CRA3;F2CS23;F2D483;F2D702;F2DDD5;F2DFA6;F2E0C0;F2E556;F2EG94
GO:0006766	vitamin metabolic process	5	24	0.353447	0.896062	A0A8I6YQI6;A0A8I6YQU0;F2DR63;F2DYM4;F2EDT9
GO:0050789	regulation of biological process	55	320	0.355222	0.896062	A0A287EZV5;A0A287FP91;A0A287FZ34;A0A8I6WDS1;A0A8I6WHE5;A0A8I6WV37;A0A8I6WXW1;A0A8I6X017;A0A8I6XBH2;A0A8I6XCP7;A0A8I6XDB4;A0A8I6XEF6;A0A8I6XEP9;A0A8I6XJN9;A0A8I6XTB9;A0A8I6Y5Z0;A0A8I6YIV5;A0A8I6YL06;A0A8I6Z0S4;A0A8I6Z4M3;A0A8I6Z9Z3;A0A8I7B2K7;A0A8I7BE86;A1X810;A1XXI9;F2CPL2;F2CQ03;F2CQX6;F2CQY5;F2CRG7;F2CRK1;F2CT56;F2CTS1;F2CWF3;F2CXL5;F2D3D5;F2D6M6;F2D7S9;F2DAR0;F2DC93;F2DLR6;F2DS97;F2DSZ9;F2DXG7…
GO:0006281	DNA repair	9	47	0.357366	0.896062	A0A287EZS0;A0A287U5M5;A0A8I6YS17;A0A8I6YZG5;F2CQH9;F2D0W0;F2DNW4;F2DUJ6;F2ELJ9
GO:0006892	post-Golgi vesicle-mediated transport	3	13	0.359169	0.896062	A0A8I6WHM6;A0A8I6YC75;A0A8I6ZAC4
GO:0009832	plant-type cell wall biogenesis	3	13	0.359169	0.896062	A0A0U2GJJ3;A0A0U2GJL1;F2DIP6
GO:0030150	protein import into mitochondrial matrix	3	13	0.359169	0.896062	A0A8I6WIA9;F2DIG1;F2E405
GO:0042180	cellular ketone metabolic process	3	13	0.359169	0.896062	A0A8I6XQ26;A0A8I6YTX6;F2DSZ9
GO:0009123	nucleoside monophosphate metabolic process	17	94	0.362641	0.896062	A0A8I6WKM0;A0A8I6WTI3;A0A8I6X6B1;A0A8I6XBW8;A0A8I6XD03;A0A8I6YH05;A0A8I7BBH0;A0A8I7BCM2;F2CQV1;F2CT87;F2CW03;F2CWQ6;F2D7B2;F2DJJ2;F2DMM2;F2E2B0;F2EL27
GO:1990542	mitochondrial transmembrane transport	6	30	0.364248	0.896062	A0A8I6WIA9;A0A8I6Y690;F2CXT5;F2DIG1;F2DJJ2;F2E405
GO:0015980	energy derivation by oxidation of organic compounds	15	83	0.377154	0.896062	A0A2P1AB13;A0A8I6WGG3;A0A8I6WTI3;A0A8I6XFM0;A0A8I6YH05;A0A8I7BFU9;C3W8L3;F2CT87;F2D7B2;F2DMM2;F2DS63;F2DUI2;F2E2B0;F2EL27;Q8SA48
GO:0006405	RNA export from nucleus	4	19	0.37756	0.896062	A0A8I6YLT8;F2D6G3;F2D8K0;F2E4I7
GO:0034605	cellular response to heat	4	19	0.37756	0.896062	A0A8I6YT49;F2CPL2;F2DAW4;F2EFK9
GO:0045324	late endosome to vacuole transport	4	19	0.37756	0.896062	A0A287NWK0;F2CT83;F2D2Z9;F2DA66
GO:0072528	pyrimidine-containing compound biosynthetic process	4	19	0.37756	0.896062	A0A8I6WHD1;A0A8I6WKM0;A0A8I7BBH0;F2EIL0
GO:0006120	mitochondrial electron transport, NADH to ubiquinone	2	8	0.385057	0.896062	A0A8I6YH05;F2D7B2
GO:0006544	glycine metabolic process	2	8	0.385057	0.896062	F2DDV8;F2DZ70
GO:0006625	protein targeting to peroxisome	2	8	0.385057	0.896062	A0A8I6WF91;F2CXT5
GO:0007059	chromosome segregation	2	8	0.385057	0.896062	A0A8I6XJN9;F2DNW4
GO:0009071	serine family amino acid catabolic process	2	8	0.385057	0.896062	F2DDV8;F2DZ70
GO:0009267	cellular response to starvation	2	8	0.385057	0.896062	F2E0P9;F2E3X1
GO:0009856	pollination	2	8	0.385057	0.896062	A0A8I6XBD2;F2E3X1
GO:0019220	regulation of phosphate metabolic process	2	8	0.385057	0.896062	A0A8I6YIV5;F2DZF2
GO:0031329	regulation of cellular catabolic process	2	8	0.385057	0.896062	A0A8I6XJN9;F2DC93
GO:0033962	cytoplasmic mRNA processing body assembly	2	8	0.385057	0.896062	A0A8I6X1I1;F2D6M6
GO:0035999	tetrahydrofolate interconversion	2	8	0.385057	0.896062	A0A8I6XQX4;A0A8I6YWJ4
GO:0042594	response to starvation	2	8	0.385057	0.896062	F2E0P9;F2E3X1
GO:0042742	defense response to bacterium	2	8	0.385057	0.896062	A0A8I7BCT1;F2DGM5
GO:0043574	peroxisomal transport	2	8	0.385057	0.896062	A0A8I6WF91;F2CXT5
GO:0044550	secondary metabolite biosynthetic process	2	8	0.385057	0.896062	F2CPM4;F2E7V8
GO:0044706	multi-multicellular organism process	2	8	0.385057	0.896062	A0A8I6XBD2;F2E3X1
GO:0051174	regulation of phosphorus metabolic process	2	8	0.385057	0.896062	A0A8I6YIV5;F2DZF2
GO:0072662	protein localization to peroxisome	2	8	0.385057	0.896062	A0A8I6WF91;F2CXT5
GO:0072663	establishment of protein localization to peroxisome	2	8	0.385057	0.896062	A0A8I6WF91;F2CXT5
GO:0019395	fatty acid oxidation	5	25	0.388511	0.896062	A0A8I6XCQ2;A0A8I6XRG5;A0A8I6XUQ8;F2D1C6;F2DHZ5
GO:0044763	single-organism cellular process	188	1132	0.390468	0.896062	A0A287EZS0;A0A287EZV5;A0A287FP91;A0A287FZ34;A0A287PY01;A0A287TWK6;A0A287U5M5;A0A2P1AB13;A0A3S9KBF3;A0A5C1YV39;A0A8I6WDS1;A0A8I6WF91;A0A8I6WGG3;A0A8I6WHD1;A0A8I6WHE5;A0A8I6WIA9;A0A8I6WKG3;A0A8I6WKM0;A0A8I6WMI1;A0A8I6WQV8;A0A8I6WT14;A0A8I6WTI3;A0A8I6WTQ8;A0A8I6WV37;A0A8I6WWA9;A0A8I6WWJ7;A0A8I6WXW1;A0A8I6X017;A0A8I6X0Z2;A0A8I6X6B1;A0A8I6X6J9;A0A8I6X8X0;A0A8I6XBD2;A0A8I6XBW8;A0A8I6XCP7;A0A8I6XCQ2;A0A…
GO:0044260	cellular macromolecule metabolic process	123	736	0.392534	0.896062	A0A287EZS0;A0A287NWK0;A0A287U5M5;A0A2P1AB13;A0A8I6WB19;A0A8I6WDS1;A0A8I6WFJ6;A0A8I6WKG3;A0A8I6WQV8;A0A8I6WT04;A0A8I6WV37;A0A8I6X0M9;A0A8I6X472;A0A8I6X7M2;A0A8I6X7Q6;A0A8I6XCP7;A0A8I6XD40;A0A8I6XDB4;A0A8I6XEF6;A0A8I6XEM6;A0A8I6XEP7;A0A8I6XEW3;A0A8I6XF02;A0A8I6XH22;A0A8I6XH57;A0A8I6XJN9;A0A8I6XQQ9;A0A8I6XRV2;A0A8I6XUG0;A0A8I6XWQ1;A0A8I6Y0T7;A0A8I6Y2P0;A0A8I6Y4Z6;A0A8I6Y6M4;A0A8I6YF06;A0A8I6YF87;A0A…
GO:0009124	nucleoside monophosphate biosynthetic process	6	31	0.395772	0.896062	A0A8I6WKM0;A0A8I6X6B1;A0A8I6XD03;A0A8I7BBH0;F2CWQ6;F2DJJ2
GO:0051172	negative regulation of nitrogen compound metabolic process	7	37	0.400906	0.896062	A0A8I6WV37;A0A8I6YL06;A0A8I6Z9Z3;F2CQ03;F2D6M6;F2EHE1;M0Y7Q2
GO:1902589	single-organism organelle organization	22	126	0.401252	0.896062	A0A8I6WF91;A0A8I6WMI1;A0A8I6WQV8;A0A8I6WTQ8;A0A8I6WV37;A0A8I6X8X0;A0A8I6XJN9;A0A8I6XUG0;A0A8I6YKQ7;A0A8I6YL06;F2CVM4;F2CXT5;F2DNW4;F2DRI5;F2DVS7;F2DXB7;F2E298;F2E2M2;F2EFV3;F2EHE1;F2EIG1;M0Y7Q2
GO:0015672	monovalent inorganic cation transport	3	14	0.407101	0.896062	F2CWF3;F2CWQ6;F2DJJ2
GO:0051049	regulation of transport	3	14	0.407101	0.896062	F2CWF3;F2DXG7;F2E3M7
GO:0043161	proteasome-mediated ubiquitin-dependent protein catabolic process	9	49	0.407558	0.896062	A0A8I6WKG3;A0A8I6XJN9;A0A8I6Y0T7;A0A8I7B6R2;F2D7S9;F2D894;F2DC74;F2DJW8;F2DUJ6
GO:0051179	localization	74	441	0.414389	0.896062	A0A287FZ34;A0A287LRJ1;A0A287NWK0;A0A287Q7U2;A0A8I6WF91;A0A8I6WHM6;A0A8I6WIA9;A0A8I6WIT4;A0A8I6WMI1;A0A8I6WTJ0;A0A8I6WTQ8;A0A8I6X017;A0A8I6X0Z2;A0A8I6X2Y8;A0A8I6X8X0;A0A8I6XB86;A0A8I6XBH2;A0A8I6XEC2;A0A8I6XLR3;A0A8I6XNN7;A0A8I6XZV6;A0A8I6Y690;A0A8I6YC75;A0A8I6YEZ5;A0A8I6YLT8;A0A8I6YXG1;A0A8I6Z7P9;A0A8I6ZAC4;A0A8I7B2K7;A0A8I7B3D9;A0A8I7B654;F2CQY5;F2CRN1;F2CT83;F2CV17;F2CV36;F2CWB3;F2CWC9;F2CWF3;F2…
GO:0000086	G2/M transition of mitotic cell cycle	1	3	0.414515	0.896062	A0A8I6WDS1
GO:0000447	endonucleolytic cleavage in ITS1 to separate SSU-rRNA from 5.8S rRNA and LSU-rRNA from tricistronic rRNA transcript (SSU-rRNA, 5.8S rRNA, LSU-rRNA)	1	3	0.414515	0.896062	F2CS23
GO:0000478	endonucleolytic cleavage involved in rRNA processing	1	3	0.414515	0.896062	F2CS23
GO:0000479	endonucleolytic cleavage of tricistronic rRNA transcript (SSU-rRNA, 5.8S rRNA, LSU-rRNA)	1	3	0.414515	0.896062	F2CS23
GO:0006225	UDP biosynthetic process	1	3	0.414515	0.896062	F2EIL0
GO:0006449	regulation of translational termination	1	3	0.414515	0.896062	A0A8I6XEF6
GO:0006591	ornithine metabolic process	1	3	0.414515	0.896062	F2CW53
GO:0006624	vacuolar protein processing	1	3	0.414515	0.896062	A0A8I6YVL6
GO:0006771	riboflavin metabolic process	1	3	0.414515	0.896062	A0A8I6YQU0
GO:0006801	superoxide metabolic process	1	3	0.414515	0.896062	F2CQX6
GO:0006833	water transport	1	3	0.414515	0.896062	F2E3X1
GO:0006862	nucleotide transport	1	3	0.414515	0.896062	F2DG80
GO:0007009	plasma membrane organization	1	3	0.414515	0.896062	M0XN08
GO:0007018	microtubule-based movement	1	3	0.414515	0.896062	A0A8I6YCQ1
GO:0007064	mitotic sister chromatid cohesion	1	3	0.414515	0.896062	F2DNW4
GO:0007088	regulation of mitotic nuclear division	1	3	0.414515	0.896062	A0A8I6XJN9
GO:0007155	cell adhesion	1	3	0.414515	0.896062	A0A8I6XBD2
GO:0008535	respiratory chain complex IV assembly	1	3	0.414515	0.896062	F2DK52
GO:0009143	nucleoside triphosphate catabolic process	1	3	0.414515	0.896062	A0A8I7BBH0
GO:0009188	ribonucleoside diphosphate biosynthetic process	1	3	0.414515	0.896062	F2EIL0
GO:0009193	pyrimidine ribonucleoside diphosphate metabolic process	1	3	0.414515	0.896062	F2EIL0
GO:0009194	pyrimidine ribonucleoside diphosphate biosynthetic process	1	3	0.414515	0.896062	F2EIL0
GO:0009204	deoxyribonucleoside triphosphate catabolic process	1	3	0.414515	0.896062	A0A8I7BBH0
GO:0009231	riboflavin biosynthetic process	1	3	0.414515	0.896062	A0A8I6YQU0
GO:0009313	oligosaccharide catabolic process	1	3	0.414515	0.896062	A0A8I6XUU4
GO:0009396	folic acid-containing compound biosynthetic process	1	3	0.414515	0.896062	F2DYM4
GO:0009615	response to virus	1	3	0.414515	0.896062	M0WNW4
GO:0009627	systemic acquired resistance	1	3	0.414515	0.896062	A0A8I6XTL4
GO:0009646	response to absence of light	1	3	0.414515	0.896062	F2CPL2
GO:0009812	flavonoid metabolic process	1	3	0.414515	0.896062	F2DSZ9
GO:0009813	flavonoid biosynthetic process	1	3	0.414515	0.896062	F2DSZ9
GO:0009814	defense response, incompatible interaction	1	3	0.414515	0.896062	A0A8I6XTL4
GO:0009850	auxin metabolic process	1	3	0.414515	0.896062	A0A8I7BAE7
GO:0009853	photorespiration	1	3	0.414515	0.896062	F2CVA4
GO:0010389	regulation of G2/M transition of mitotic cell cycle	1	3	0.414515	0.896062	A0A8I6WDS1
GO:0010506	regulation of autophagy	1	3	0.414515	0.896062	F2DC93
GO:0010565	regulation of cellular ketone metabolic process	1	3	0.414515	0.896062	F2DSZ9
GO:0016560	protein import into peroxisome matrix, docking	1	3	0.414515	0.896062	A0A8I6WF91
GO:0018958	phenol-containing compound metabolic process	1	3	0.414515	0.896062	A0A8I6WT14
GO:0019216	regulation of lipid metabolic process	1	3	0.414515	0.896062	F2DSZ9
GO:0019464	glycine decarboxylation via glycine cleavage system	1	3	0.414515	0.896062	F2DDV8
GO:0019877	diaminopimelate biosynthetic process	1	3	0.414515	0.896062	A0A8I6WWJ7
GO:0022008	neurogenesis	1	3	0.414515	0.896062	F2E3M7
GO:0022610	biological adhesion	1	3	0.414515	0.896062	A0A8I6XBD2
GO:0022615	protein to membrane docking	1	3	0.414515	0.896062	A0A8I6WF91
GO:0030182	neuron differentiation	1	3	0.414515	0.896062	F2E3M7
GO:0031125	rRNA 3'-end processing	1	3	0.414515	0.896062	F2CS23
GO:0031126	snoRNA 3'-end processing	1	3	0.414515	0.896062	F2DDD5
GO:0033539	fatty acid beta-oxidation using acyl-CoA dehydrogenase	1	3	0.414515	0.896062	A0A8I6XCQ2
GO:0033617	mitochondrial respiratory chain complex IV assembly	1	3	0.414515	0.896062	F2DK52
GO:0034250	positive regulation of cellular amide metabolic process	1	3	0.414515	0.896062	A0A8I6XEF6
GO:0035337	fatty-acyl-CoA metabolic process	1	3	0.414515	0.896062	A0A5C1YV39
GO:0036257	multivesicular body organization	1	3	0.414515	0.896062	F2DVS7
GO:0042044	fluid transport	1	3	0.414515	0.896062	F2E3X1
GO:0042559	pteridine-containing compound biosynthetic process	1	3	0.414515	0.896062	F2DYM4
GO:0042726	flavin-containing compound metabolic process	1	3	0.414515	0.896062	A0A8I6YQU0
GO:0042727	flavin-containing compound biosynthetic process	1	3	0.414515	0.896062	A0A8I6YQU0
GO:0043144	snoRNA processing	1	3	0.414515	0.896062	F2DDD5
GO:0043243	positive regulation of protein complex disassembly	1	3	0.414515	0.896062	A0A8I6XEF6
GO:0043622	cortical microtubule organization	1	3	0.414515	0.896062	F2E2M2
GO:0044839	cell cycle G2/M phase transition	1	3	0.414515	0.896062	A0A8I6WDS1
GO:0045727	positive regulation of translation	1	3	0.414515	0.896062	A0A8I6XEF6
GO:0045901	positive regulation of translational elongation	1	3	0.414515	0.896062	A0A8I6XEF6
GO:0045905	positive regulation of translational termination	1	3	0.414515	0.896062	A0A8I6XEF6
GO:0046048	UDP metabolic process	1	3	0.414515	0.896062	F2EIL0
GO:0046352	disaccharide catabolic process	1	3	0.414515	0.896062	A0A8I6XUU4
GO:0046704	CDP metabolic process	1	3	0.414515	0.896062	F2EIL0
GO:0046705	CDP biosynthetic process	1	3	0.414515	0.896062	F2EIL0
GO:0046890	regulation of lipid biosynthetic process	1	3	0.414515	0.896062	F2DSZ9
GO:0048699	generation of neurons	1	3	0.414515	0.896062	F2E3M7
GO:0051606	detection of stimulus	1	3	0.414515	0.896062	A0A8I6XCP7
GO:0051783	regulation of nuclear division	1	3	0.414515	0.896062	A0A8I6XJN9
GO:0071478	cellular response to radiation	1	3	0.414515	0.896062	A0A8I6XCP7
GO:0071482	cellular response to light stimulus	1	3	0.414515	0.896062	A0A8I6XCP7
GO:0072659	protein localization to plasma membrane	1	3	0.414515	0.896062	M0XN08
GO:0090502	RNA phosphodiester bond hydrolysis, endonucleolytic	1	3	0.414515	0.896062	F2CS23
GO:0097034	mitochondrial respiratory chain complex IV biogenesis	1	3	0.414515	0.896062	F2DK52
GO:0098609	cell-cell adhesion	1	3	0.414515	0.896062	A0A8I6XBD2
GO:1901264	carbohydrate derivative transport	1	3	0.414515	0.896062	F2DG80
GO:1901679	nucleotide transmembrane transport	1	3	0.414515	0.896062	F2DG80
GO:1902749	regulation of cell cycle G2/M phase transition	1	3	0.414515	0.896062	A0A8I6WDS1
GO:1990778	protein localization to cell periphery	1	3	0.414515	0.896062	M0XN08
GO:0009126	purine nucleoside monophosphate metabolic process	15	85	0.415479	0.896062	A0A8I6WTI3;A0A8I6X6B1;A0A8I6XBW8;A0A8I6XD03;A0A8I6YH05;A0A8I7BCM2;F2CQV1;F2CT87;F2CW03;F2CWQ6;F2D7B2;F2DJJ2;F2DMM2;F2E2B0;F2EL27
GO:0009167	purine ribonucleoside monophosphate metabolic process	15	85	0.415479	0.896062	A0A8I6WTI3;A0A8I6X6B1;A0A8I6XBW8;A0A8I6XD03;A0A8I6YH05;A0A8I7BCM2;F2CQV1;F2CT87;F2CW03;F2CWQ6;F2D7B2;F2DJJ2;F2DMM2;F2E2B0;F2EL27
GO:0071669	plant-type cell wall organization or biogenesis	4	20	0.41748	0.899097	A0A0U2GJJ3;A0A0U2GJL1;A0A8I6Y180;F2DIP6
GO:0009311	oligosaccharide metabolic process	5	26	0.423449	0.906556	A0A8I6XH57;A0A8I6XI70;A0A8I6XUU4;F2DQH1;Q4A1H2
GO:0032269	negative regulation of cellular protein metabolic process	5	26	0.423449	0.906556	A0A8I6XJN9;A0A8I6Z9Z3;F2CQ03;F2D6M6;F2DZF2
GO:0051248	negative regulation of protein metabolic process	5	26	0.423449	0.906556	A0A8I6XJN9;A0A8I6Z9Z3;F2CQ03;F2D6M6;F2DZF2
GO:0006811	ion transport	6	32	0.427233	0.906556	A0A8I7B3D9;F2CWF3;F2CWQ6;F2DG80;F2DJJ2;F2DXG7
GO:0010256	endomembrane system organization	7	38	0.429765	0.906556	A0A287Q7U2;A0A8I6WWA9;A0A8I6X2Y8;A0A8I7B6R2;F2DVS7;F2E3J0;M0XN08
GO:0006099	tricarboxylic acid cycle	8	44	0.431507	0.906556	A0A8I6WGG3;A0A8I6WTI3;A0A8I6XFM0;F2CT87;F2DS63;F2DUI2;F2EL27;Q8SA48
GO:0006101	citrate metabolic process	8	44	0.431507	0.906556	A0A8I6WGG3;A0A8I6WTI3;A0A8I6XFM0;F2CT87;F2DS63;F2DUI2;F2EL27;Q8SA48
GO:0034622	cellular macromolecular complex assembly	24	140	0.432125	0.906556	A0A287U5M5;A0A8I6WMI1;A0A8I6WV37;A0A8I6X0M9;A0A8I6X1I1;A0A8I6X7Q6;A0A8I6XBL4;A0A8I6XEM6;A0A8I6XEW3;A0A8I6XWQ1;A0A8I6YL06;A0A8I6YZG5;A0A8I6ZA75;F2CRK1;F2CUP3;F2CX02;F2D6M6;F2D788;F2DFA6;F2DK52;F2DXD4;F2ECG8;F2ED67;F2EHE1
GO:0000272	polysaccharide catabolic process	10	56	0.433556	0.906556	A0A8I6W6F0;A0A8I6WS80;A0A8I6XH57;A0A8I6Y7K8;A0A8I6YF87;A0A8I6YIR4;A0A8I7BFU9;F2EFV1;F2ELP4;Q42835
GO:0032446	protein modification by small protein conjugation	10	56	0.433556	0.906556	A0A8I6X0M9;A0A8I6X7M2;A0A8I6XJN9;A0A8I6YHZ7;A0A8I6YNI8;A0A8I7BF02;F2CQH9;F2CW55;F2D7S9;F2E3I5
GO:0009161	ribonucleoside monophosphate metabolic process	16	92	0.434622	0.906556	A0A8I6WKM0;A0A8I6WTI3;A0A8I6X6B1;A0A8I6XBW8;A0A8I6XD03;A0A8I6YH05;A0A8I7BCM2;F2CQV1;F2CT87;F2CW03;F2CWQ6;F2D7B2;F2DJJ2;F2DMM2;F2E2B0;F2EL27
GO:0010033	response to organic substance	16	92	0.434622	0.906556	A0A8I6WGX0;A0A8I6WXW1;A0A8I6XWW8;A0A8I6Y5Z0;A0A8I6Z4M3;A1XXI9;F2CPL2;F2D7S9;F2DAR0;F2DGM5;F2DSZ9;F2DXX0;F2E4I7;F2EF30;Q43488;T1TD43
GO:0009144	purine nucleoside triphosphate metabolic process	13	74	0.434677	0.906556	A0A8I6WTI3;A0A8I6XBW8;A0A8I6YH05;A0A8I7BCM2;F2CQV1;F2CT87;F2CW03;F2CWQ6;F2D7B2;F2DJJ2;F2DMM2;F2E2B0;F2EL27
GO:0009205	purine ribonucleoside triphosphate metabolic process	13	74	0.434677	0.906556	A0A8I6WTI3;A0A8I6XBW8;A0A8I6YH05;A0A8I7BCM2;F2CQV1;F2CT87;F2CW03;F2CWQ6;F2D7B2;F2DJJ2;F2DMM2;F2E2B0;F2EL27
GO:0016192	vesicle-mediated transport	29	171	0.443717	0.906556	A0A287FZ34;A0A8I6WHM6;A0A8I6WMI1;A0A8I6WTQ8;A0A8I6X017;A0A8I6X0Z2;A0A8I6X2Y8;A0A8I6X8X0;A0A8I6XEC2;A0A8I6XLR3;A0A8I6XZV6;A0A8I6YC75;A0A8I6YXG1;A0A8I6Z7P9;A0A8I6ZAC4;F2CRN1;F2CT83;F2CWB3;F2D2Z9;F2DA66;F2DE60;F2DKP3;F2DLD7;F2DRI5;F2DVS7;F2E0U3;F2E298;F2E376;F2E422
GO:0006094	gluconeogenesis	2	9	0.446428	0.906556	F2CQV1;F2DEG9
GO:0006189	'de novo' IMP biosynthetic process	2	9	0.446428	0.906556	A0A8I6X6B1;A0A8I6XD03
GO:0006207	'de novo' pyrimidine nucleobase biosynthetic process	2	9	0.446428	0.906556	A0A8I6WKM0;F2EIL0
GO:0006903	vesicle targeting	2	9	0.446428	0.906556	A0A8I6WTQ8;A0A8I6ZAC4
GO:0006997	nucleus organization	2	9	0.446428	0.906556	A0A8I7B6R2;F2E3M7
GO:0007067	mitotic nuclear division	2	9	0.446428	0.906556	A0A8I6XJN9;F2DNW4
GO:0007346	regulation of mitotic cell cycle	2	9	0.446428	0.906556	A0A8I6WDS1;A0A8I6XJN9
GO:0009129	pyrimidine nucleoside monophosphate metabolic process	2	9	0.446428	0.906556	A0A8I6WKM0;A0A8I7BBH0
GO:0009130	pyrimidine nucleoside monophosphate biosynthetic process	2	9	0.446428	0.906556	A0A8I6WKM0;A0A8I7BBH0
GO:0009147	pyrimidine nucleoside triphosphate metabolic process	2	9	0.446428	0.906556	A0A8I6WHD1;A0A8I7BBH0
GO:0010817	regulation of hormone levels	2	9	0.446428	0.906556	A0A8I6WT04;A0A8I7BAE7
GO:0015711	organic anion transport	2	9	0.446428	0.906556	A0A8I7B3D9;F2DG80
GO:0019319	hexose biosynthetic process	2	9	0.446428	0.906556	F2CQV1;F2DEG9
GO:0031669	cellular response to nutrient levels	2	9	0.446428	0.906556	F2E0P9;F2E3X1
GO:0032270	positive regulation of cellular protein metabolic process	2	9	0.446428	0.906556	A0A8I6XEF6;A0A8I6YIV5
GO:0046653	tetrahydrofolate metabolic process	2	9	0.446428	0.906556	A0A8I6XQX4;A0A8I6YWJ4
GO:0050821	protein stabilization	2	9	0.446428	0.906556	A0A8I6YT49;A0A8I7B659
GO:0009073	aromatic amino acid family biosynthetic process	3	15	0.453902	0.906556	A0A8I6YFL0;A0A8I6YHI9;A0A8I7BJR0
GO:0009142	nucleoside triphosphate biosynthetic process	3	15	0.453902	0.906556	A0A8I6WHD1;F2CWQ6;F2DJJ2
GO:0010628	positive regulation of gene expression	3	15	0.453902	0.906556	A0A8I6XEF6;A1XXI9;F2E3M7
GO:0042546	cell wall biogenesis	3	15	0.453902	0.906556	A0A0U2GJJ3;A0A0U2GJL1;F2DIP6
GO:0048278	vesicle docking	3	15	0.453902	0.906556	A0A8I6ZAC4;F2DRI5;F2E298
GO:0098655	cation transmembrane transport	3	15	0.453902	0.906556	F2CWF3;F2CWQ6;F2DJJ2
GO:0098662	inorganic cation transmembrane transport	3	15	0.453902	0.906556	F2CWF3;F2CWQ6;F2DJJ2
GO:0030154	cell differentiation	4	21	0.456787	0.906556	A0A287TWK6;A0A8I6Z1P9;A0A8I7B5R8;F2E3M7
GO:0072527	pyrimidine-containing compound metabolic process	4	21	0.456787	0.906556	A0A8I6WHD1;A0A8I6WKM0;A0A8I7BBH0;F2EIL0
GO:0043623	cellular protein complex assembly	10	57	0.457274	0.906556	A0A8I6WMI1;A0A8I6X0M9;A0A8I6X7Q6;A0A8I6XBL4;A0A8I6ZA75;F2CRK1;F2CX02;F2DK52;F2ECG8;F2ED67
GO:0006366	transcription from RNA polymerase II promoter	5	27	0.458006	0.906556	A0A8I6XEM6;F2DUE6;F2ECG8;F2EJZ7;M0Y7Q2
GO:0009062	fatty acid catabolic process	5	27	0.458006	0.906556	A0A8I6XCQ2;A0A8I6XRG5;A0A8I6XUQ8;F2D1C6;F2DHZ5
GO:0046390	ribose phosphate biosynthetic process	8	45	0.458199	0.906556	A0A5C1YV39;A0A8I6WKM0;A0A8I6X6B1;A0A8I6XD03;F2CWQ6;F2D119;F2DJJ2;F2EIL0
GO:0072350	tricarboxylic acid metabolic process	8	45	0.458199	0.906556	A0A8I6WGG3;A0A8I6WTI3;A0A8I6XFM0;F2CT87;F2DS63;F2DUI2;F2EL27;Q8SA48
GO:0016197	endosomal transport	7	39	0.458447	0.906556	A0A287NWK0;A0A8I6XEC2;F2CT83;F2D2Z9;F2D5K0;F2DA66;F2DP42
GO:0044702	single organism reproductive process	7	39	0.458447	0.906556	A0A8I6WXG8;A0A8I6XBD2;A0A8I6XJN9;F2DZK3;F2E3X1;F2EKQ3;Q673G6
GO:0016310	phosphorylation	23	136	0.463621	0.906556	A0A287FP91;A0A8I6WTI3;A0A8I6WXW1;A0A8I6X017;A0A8I6XBW8;A0A8I6YH05;A0A8I6YIV5;A0A8I6Z0S4;A0A8I7BCM2;F2CQV1;F2CT87;F2CW03;F2D480;F2D7B2;F2DMM2;F2DS97;F2DZN2;F2E2B0;F2E2C7;F2E8P3;F2EIL0;F2EL27;M0XGU8
GO:0006950	response to stress	57	343	0.465669	0.906556	A0A287EZS0;A0A287PY01;A0A287U5M5;A0A8I6WDS1;A0A8I6WHE5;A0A8I6XJF2;A0A8I6XTB9;A0A8I6XTL4;A0A8I6XWW8;A0A8I6Y4Z6;A0A8I6Y5Z0;A0A8I6YHJ3;A0A8I6YS17;A0A8I6YT49;A0A8I6YXG5;A0A8I6YZG5;A0A8I6Z9Z3;A0A8I7B6N5;A0A8I7B995;A0A8I7BCT1;A8V3Q1;A8V3Y1;F2CPL2;F2CQH9;F2CQX6;F2CRR9;F2CU44;F2CUF5;F2CZC9;F2D0W0;F2D6M8;F2D9U3;F2DAR0;F2DAW4;F2DC93;F2DE94;F2DGM5;F2DHP2;F2DNW4;F2DQH1;F2DUJ6;F2DXX0;F2DZN2;F2E0P9;F2E3X1;F2E4…
GO:0019438	aromatic compound biosynthetic process	32	191	0.468099	0.906556	A0A5C1YV39;A0A8I6WB26;A0A8I6WHD1;A0A8I6WKM0;A0A8I6WNS5;A0A8I6X6B1;A0A8I6XCP7;A0A8I6XD03;A0A8I6XDB4;A0A8I6XEM6;A0A8I6XFM9;A0A8I6YFL0;A0A8I6YHI9;A0A8I6Z4M3;A0A8I7B3E6;A0A8I7BBH0;A0A8I7BEI9;A0A8I7BJR0;A1XXI9;F2CPM4;F2CWQ6;F2D119;F2DC91;F2DJJ2;F2DUE6;F2DYM4;F2E7V8;F2ECG8;F2EHE1;F2EIL0;F2EJZ7;M0Y7Q2
GO:0006163	purine nucleotide metabolic process	17	100	0.470547	0.906556	A0A5C1YV39;A0A8I6WTI3;A0A8I6X6B1;A0A8I6XBW8;A0A8I6XD03;A0A8I6YH05;A0A8I7BCM2;F2CQV1;F2CT87;F2CW03;F2CWQ6;F2D119;F2D7B2;F2DJJ2;F2DMM2;F2E2B0;F2EL27
GO:0044699	single-organism process	229	1395	0.474283	0.906556	A0A287EZS0;A0A287EZV5;A0A287FP91;A0A287FZ34;A0A287ILG2;A0A287NWK0;A0A287PY01;A0A287TWK6;A0A287U5M5;A0A2P1AB13;A0A3S9KBF3;A0A5C1YV39;A0A8I6WDS1;A0A8I6WF91;A0A8I6WGG3;A0A8I6WHD1;A0A8I6WHE5;A0A8I6WHM6;A0A8I6WIA9;A0A8I6WIT4;A0A8I6WKG3;A0A8I6WKM0;A0A8I6WMI1;A0A8I6WQV8;A0A8I6WT14;A0A8I6WTI3;A0A8I6WTQ8;A0A8I6WV37;A0A8I6WWA9;A0A8I6WWJ7;A0A8I6WXG8;A0A8I6WXW1;A0A8I6X017;A0A8I6X0Z2;A0A8I6X2Y8;A0A8I6X6B1;A0A…
GO:1901607	alpha-amino acid biosynthetic process	14	82	0.474553	0.906556	A0A8I6WWJ7;A0A8I6XFM9;A0A8I6XPB3;A0A8I6Y4J8;A0A8I6YFL0;A0A8I6YHI9;A0A8I6YWJ4;A0A8I7B4C5;A0A8I7BJR0;F2CW53;F2D643;F2DYM4;F2E2C7;F2E3I7
GO:0016043	cellular component organization	77	466	0.475412	0.906556	A0A0U2GJJ3;A0A0U2GJL1;A0A287Q7U2;A0A287U5M5;A0A8I6WF91;A0A8I6WIA9;A0A8I6WMI1;A0A8I6WQV8;A0A8I6WS80;A0A8I6WTQ8;A0A8I6WV37;A0A8I6WWA9;A0A8I6X0M9;A0A8I6X1I1;A0A8I6X2Y8;A0A8I6X7Q6;A0A8I6X8X0;A0A8I6XBL4;A0A8I6XEF6;A0A8I6XEM6;A0A8I6XEW3;A0A8I6XJF2;A0A8I6XJN9;A0A8I6XUG0;A0A8I6XWQ1;A0A8I6Y180;A0A8I6Y871;A0A8I6YIK8;A0A8I6YKQ7;A0A8I6YL06;A0A8I6YZG5;A0A8I6ZA75;A0A8I6ZAC4;A0A8I7B6R2;A0A8I7B995;F2CRK1;F2CT83;…
GO:0009199	ribonucleoside triphosphate metabolic process	13	76	0.476005	0.906556	A0A8I6WTI3;A0A8I6XBW8;A0A8I6YH05;A0A8I7BCM2;F2CQV1;F2CT87;F2CW03;F2CWQ6;F2D7B2;F2DJJ2;F2DMM2;F2E2B0;F2EL27
GO:0009058	biosynthetic process	113	687	0.484445	0.906556	A0A287EZS0;A0A287SCX5;A0A2P1AB13;A0A5C1YV39;A0A8I6WB19;A0A8I6WB26;A0A8I6WDS1;A0A8I6WHD1;A0A8I6WKM0;A0A8I6WNS5;A0A8I6WQV8;A0A8I6WWJ7;A0A8I6X6B1;A0A8I6XCP7;A0A8I6XD03;A0A8I6XDB4;A0A8I6XEF6;A0A8I6XEM6;A0A8I6XFM9;A0A8I6XH22;A0A8I6XH57;A0A8I6XI70;A0A8I6XPB3;A0A8I6XRV2;A0A8I6XUG0;A0A8I6XWQ1;A0A8I6Y4J8;A0A8I6YFL0;A0A8I6YFN2;A0A8I6YHI9;A0A8I6YIK8;A0A8I6YQI6;A0A8I6YQU0;A0A8I6YWJ4;A0A8I6Z4M3;A0A8I6Z9Z3;A0A…
GO:0065002	intracellular protein transmembrane transport	7	40	0.486815	0.906556	A0A8I6WF91;A0A8I6WIA9;F2CV17;F2CWN4;F2CXT5;F2DIG1;F2E405
GO:0071806	protein transmembrane transport	7	40	0.486815	0.906556	A0A8I6WF91;A0A8I6WIA9;F2CV17;F2CWN4;F2CXT5;F2DIG1;F2E405
GO:0072593	reactive oxygen species metabolic process	7	40	0.486815	0.906556	A0A287PY01;A0A8I6XTB9;A0A8I6YHJ3;A0A8I6YXG5;F2CPL2;F2CQX6;F2E3X1
GO:0048878	chemical homeostasis	6	34	0.489221	0.906556	A0A8I6XBH2;A0A8I6XQR9;A0A8I6YMC3;F2CRK6;F2CW03;F2D2S2
GO:0006418	tRNA aminoacylation for protein translation	5	28	0.491956	0.906556	A0A8I6WQV8;F2E5S3;F2E941;F2EFV3;M0XNG3
GO:0009067	aspartate family amino acid biosynthetic process	5	28	0.491956	0.906556	A0A8I6WWJ7;A0A8I6XPB3;A0A8I6YWJ4;F2D643;F2E2C7
GO:0009755	hormone-mediated signaling pathway	5	28	0.491956	0.906556	A0A8I6WXW1;A0A8I6Z4M3;A1XXI9;F2D7S9;F2DAR0
GO:0043038	amino acid activation	5	28	0.491956	0.906556	A0A8I6WQV8;F2E5S3;F2E941;F2EFV3;M0XNG3
GO:0043039	tRNA aminoacylation	5	28	0.491956	0.906556	A0A8I6WQV8;F2E5S3;F2E941;F2EFV3;M0XNG3
GO:0044249	cellular biosynthetic process	104	633	0.492601	0.906556	A0A287EZS0;A0A2P1AB13;A0A5C1YV39;A0A8I6WB19;A0A8I6WB26;A0A8I6WDS1;A0A8I6WHD1;A0A8I6WKM0;A0A8I6WNS5;A0A8I6WQV8;A0A8I6WWJ7;A0A8I6X6B1;A0A8I6XCP7;A0A8I6XD03;A0A8I6XDB4;A0A8I6XEF6;A0A8I6XEM6;A0A8I6XFM9;A0A8I6XH22;A0A8I6XH57;A0A8I6XI70;A0A8I6XPB3;A0A8I6XRV2;A0A8I6XUG0;A0A8I6XWQ1;A0A8I6Y4J8;A0A8I6YFL0;A0A8I6YFN2;A0A8I6YHI9;A0A8I6YQI6;A0A8I6YQU0;A0A8I6YWJ4;A0A8I6Z4M3;A0A8I6Z9Z3;A0A8I7B3E6;A0A8I7B4C5;A0A…
GO:0006486	protein glycosylation	4	22	0.495163	0.906556	A0A8I6XH22;A0A8I6XH57;A0A8I6XRV2;A0A8I7BII2
GO:0009100	glycoprotein metabolic process	4	22	0.495163	0.906556	A0A8I6XH22;A0A8I6XH57;A0A8I6XRV2;A0A8I7BII2
GO:0009101	glycoprotein biosynthetic process	4	22	0.495163	0.906556	A0A8I6XH22;A0A8I6XH57;A0A8I6XRV2;A0A8I7BII2
GO:0009127	purine nucleoside monophosphate biosynthetic process	4	22	0.495163	0.906556	A0A8I6X6B1;A0A8I6XD03;F2CWQ6;F2DJJ2
GO:0009168	purine ribonucleoside monophosphate biosynthetic process	4	22	0.495163	0.906556	A0A8I6X6B1;A0A8I6XD03;F2CWQ6;F2DJJ2
GO:0042542	response to hydrogen peroxide	4	22	0.495163	0.906556	A0A8I6XJF2;A0A8I7B995;F2CPL2;F2CU44
GO:0043413	macromolecule glycosylation	4	22	0.495163	0.906556	A0A8I6XH22;A0A8I6XH57;A0A8I6XRV2;A0A8I7BII2
GO:0071166	ribonucleoprotein complex localization	4	22	0.495163	0.906556	A0A8I6YLT8;F2D6G3;F2D8K0;F2E4I7
GO:0071426	ribonucleoprotein complex export from nucleus	4	22	0.495163	0.906556	A0A8I6YLT8;F2D6G3;F2D8K0;F2E4I7
GO:0010498	proteasomal protein catabolic process	10	59	0.504194	0.906556	A0A8I6WKG3;A0A8I6XJN9;A0A8I6Y0T7;A0A8I7B6R2;A0MMD3;F2D7S9;F2D894;F2DC74;F2DJW8;F2DUJ6
GO:0022414	reproductive process	10	59	0.504194	0.906556	A0A8I6WJN4;A0A8I6WQV8;A0A8I6WXG8;A0A8I6XBD2;A0A8I6XJN9;F2DZK3;F2E3X1;F2EKQ3;M0XNG3;Q673G6
GO:0000280	nuclear division	2	10	0.504205	0.906556	A0A8I6XJN9;F2DNW4
GO:0006820	anion transport	2	10	0.504205	0.906556	A0A8I7B3D9;F2DG80
GO:0006898	receptor-mediated endocytosis	2	10	0.504205	0.906556	A0A8I6XZV6;A0A8I6Z7P9
GO:0007029	endoplasmic reticulum organization	2	10	0.504205	0.906556	A0A8I6WWA9;F2E3J0
GO:0009617	response to bacterium	2	10	0.504205	0.906556	A0A8I7BCT1;F2DGM5
GO:0019388	galactose catabolic process	2	10	0.504205	0.906556	A0A287ILG2;A0A8I6YK25
GO:0019856	pyrimidine nucleobase biosynthetic process	2	10	0.504205	0.906556	A0A8I6WKM0;F2EIL0
GO:0031667	response to nutrient levels	2	10	0.504205	0.906556	F2E0P9;F2E3X1
GO:0031668	cellular response to extracellular stimulus	2	10	0.504205	0.906556	F2E0P9;F2E3X1
GO:0033499	galactose catabolic process via UDP-galactose	2	10	0.504205	0.906556	A0A287ILG2;A0A8I6YK25
GO:0046351	disaccharide biosynthetic process	2	10	0.504205	0.906556	A0A8I6XI70;F2DQH1
GO:0051247	positive regulation of protein metabolic process	2	10	0.504205	0.906556	A0A8I6XEF6;A0A8I6YIV5
GO:0051726	regulation of cell cycle	2	10	0.504205	0.906556	A0A8I6WDS1;A0A8I6XJN9
GO:0071496	cellular response to external stimulus	2	10	0.504205	0.906556	F2E0P9;F2E3X1
GO:0006913	nucleocytoplasmic transport	9	53	0.507286	0.906556	A0A8I6WIT4;A0A8I6XBH2;A0A8I6YEZ5;A0A8I6YLT8;F2D6G3;F2D8K0;F2E3M7;F2E4I7;M0WNW4
GO:0009408	response to heat	9	53	0.507286	0.906556	A0A8I6XJF2;A0A8I6YT49;A0A8I7B995;F2CPL2;F2CU44;F2D6M8;F2DAW4;F2E4I7;F2EFK9
GO:0051169	nuclear transport	9	53	0.507286	0.906556	A0A8I6WIT4;A0A8I6XBH2;A0A8I6YEZ5;A0A8I6YLT8;F2D6G3;F2D8K0;F2E3M7;F2E4I7;M0WNW4
GO:0000184	nuclear-transcribed mRNA catabolic process, nonsense-mediated decay	1	4	0.510272	0.906556	A0A8I6YF06
GO:0000466	maturation of 5.8S rRNA from tricistronic rRNA transcript (SSU-rRNA, 5.8S rRNA, LSU-rRNA)	1	4	0.510272	0.906556	F2CS23
GO:0000469	cleavage involved in rRNA processing	1	4	0.510272	0.906556	F2CS23
GO:0006013	mannose metabolic process	1	4	0.510272	0.906556	F2CW03
GO:0006097	glyoxylate cycle	1	4	0.510272	0.906556	A0A8I6XFM0
GO:0006354	DNA-templated transcription, elongation	1	4	0.510272	0.906556	F2EJZ7
GO:0006400	tRNA modification	1	4	0.510272	0.906556	A0A8I6X472
GO:0006491	N-glycan processing	1	4	0.510272	0.906556	A0A8I6XH57
GO:0006611	protein export from nucleus	1	4	0.510272	0.906556	A0A8I6WIT4
GO:0006690	icosanoid metabolic process	1	4	0.510272	0.906556	M0YR50
GO:0006904	vesicle docking involved in exocytosis	1	4	0.510272	0.906556	A0A8I6ZAC4
GO:0007035	vacuolar acidification	1	4	0.510272	0.906556	F2CRK6
GO:0007062	sister chromatid cohesion	1	4	0.510272	0.906556	F2DNW4
GO:0009088	threonine biosynthetic process	1	4	0.510272	0.906556	F2E2C7
GO:0009098	leucine biosynthetic process	1	4	0.510272	0.906556	A0A8I7B4C5
GO:0009166	nucleotide catabolic process	1	4	0.510272	0.906556	A0A8I7BBH0
GO:0009753	response to jasmonic acid	1	4	0.510272	0.906556	F2D7S9
GO:0009867	jasmonic acid mediated signaling pathway	1	4	0.510272	0.906556	F2D7S9
GO:0015718	monocarboxylic acid transport	1	4	0.510272	0.906556	A0A8I7B3D9
GO:0015748	organophosphate ester transport	1	4	0.510272	0.906556	F2DG80
GO:0016074	snoRNA metabolic process	1	4	0.510272	0.906556	F2DDD5
GO:0019566	arabinose metabolic process	1	4	0.510272	0.906556	A0A8I6Y7K8
GO:0030865	cortical cytoskeleton organization	1	4	0.510272	0.906556	F2E2M2
GO:0031221	arabinan metabolic process	1	4	0.510272	0.906556	A0A8I6YF87
GO:0031222	arabinan catabolic process	1	4	0.510272	0.906556	A0A8I6YF87
GO:0032365	intracellular lipid transport	1	4	0.510272	0.906556	F2DGM5
GO:0032388	positive regulation of intracellular transport	1	4	0.510272	0.906556	F2E3M7
GO:0032434	regulation of proteasomal ubiquitin-dependent protein catabolic process	1	4	0.510272	0.906556	A0A8I6XJN9
GO:0032784	regulation of DNA-templated transcription, elongation	1	4	0.510272	0.906556	F2EJZ7
GO:0033157	regulation of intracellular protein transport	1	4	0.510272	0.906556	F2E3M7
GO:0033559	unsaturated fatty acid metabolic process	1	4	0.510272	0.906556	M0YR50
GO:0035825	reciprocal DNA recombination	1	4	0.510272	0.906556	F2DNW4
GO:0042214	terpene metabolic process	1	4	0.510272	0.906556	F2DZK7
GO:0045087	innate immune response	1	4	0.510272	0.906556	A0A8I6XTL4
GO:0045493	xylan catabolic process	1	4	0.510272	0.906556	A0A8I6YF87
GO:0045851	pH reduction	1	4	0.510272	0.906556	F2CRK6
GO:0046373	L-arabinose metabolic process	1	4	0.510272	0.906556	A0A8I6Y7K8
GO:0050779	RNA destabilization	1	4	0.510272	0.906556	F2CQ03
GO:0051131	chaperone-mediated protein complex assembly	1	4	0.510272	0.906556	A0A8I6XBL4
GO:0051222	positive regulation of protein transport	1	4	0.510272	0.906556	F2E3M7
GO:0051223	regulation of protein transport	1	4	0.510272	0.906556	F2E3M7
GO:0051302	regulation of cell division	1	4	0.510272	0.906556	A0A8I6XJN9
GO:0051452	intracellular pH reduction	1	4	0.510272	0.906556	F2CRK6
GO:0061157	mRNA destabilization	1	4	0.510272	0.906556	F2CQ03
GO:0070201	regulation of establishment of protein localization	1	4	0.510272	0.906556	F2E3M7
GO:0071214	cellular response to abiotic stimulus	1	4	0.510272	0.906556	A0A8I6XCP7
GO:0071395	cellular response to jasmonic acid stimulus	1	4	0.510272	0.906556	F2D7S9
GO:0072529	pyrimidine-containing compound catabolic process	1	4	0.510272	0.906556	A0A8I7BBH0
GO:0090316	positive regulation of intracellular protein transport	1	4	0.510272	0.906556	F2E3M7
GO:0090501	RNA phosphodiester bond hydrolysis	1	4	0.510272	0.906556	F2CS23
GO:0098754	detoxification	1	4	0.510272	0.906556	F2CQX6
GO:1901568	fatty acid derivative metabolic process	1	4	0.510272	0.906556	M0YR50
GO:1903651	positive regulation of cytoplasmic transport	1	4	0.510272	0.906556	F2E3M7
GO:1904951	positive regulation of establishment of protein localization	1	4	0.510272	0.906556	F2E3M7
GO:0009060	aerobic respiration	8	47	0.510761	0.906556	A0A8I6WGG3;A0A8I6WTI3;A0A8I6XFM0;F2CT87;F2DS63;F2DUI2;F2EL27;Q8SA48
GO:0006091	generation of precursor metabolites and energy	21	127	0.514239	0.91166	A0A2P1AB13;A0A8I6WGG3;A0A8I6WTI3;A0A8I6XBW8;A0A8I6XFM0;A0A8I6YH05;A0A8I7BCM2;A0A8I7BFU9;C3W8L3;F2CQV1;F2CRK1;F2CT87;F2CW03;F2D7B2;F2DMM2;F2DS63;F2DUI2;F2E2B0;F2E5P4;F2EL27;Q8SA48
GO:0022607	cellular component assembly	33	201	0.519061	0.918595	A0A287U5M5;A0A8I6WMI1;A0A8I6WV37;A0A8I6X0M9;A0A8I6X1I1;A0A8I6X7Q6;A0A8I6XBL4;A0A8I6XEM6;A0A8I6XEW3;A0A8I6XJF2;A0A8I6XWQ1;A0A8I6YIK8;A0A8I6YKQ7;A0A8I6YL06;A0A8I6YZG5;A0A8I6ZA75;A0A8I7B6R2;A0A8I7B995;F2CRK1;F2CU44;F2CUP3;F2CX02;F2D5L4;F2D6M6;F2D788;F2DFA6;F2DK52;F2DVS7;F2DXD4;F2E4D2;F2ECG8;F2ED67;F2EHE1
GO:0006164	purine nucleotide biosynthetic process	6	35	0.519419	0.918595	A0A5C1YV39;A0A8I6X6B1;A0A8I6XD03;F2CWQ6;F2D119;F2DJJ2
GO:0045333	cellular respiration	12	72	0.519971	0.918595	A0A8I6WGG3;A0A8I6WTI3;A0A8I6XFM0;A0A8I6YH05;F2CT87;F2D7B2;F2DMM2;F2DS63;F2DUI2;F2E2B0;F2EL27;Q8SA48
GO:0009259	ribonucleotide metabolic process	18	109	0.521429	0.918668	A0A5C1YV39;A0A8I6WKM0;A0A8I6WTI3;A0A8I6X6B1;A0A8I6XBW8;A0A8I6XD03;A0A8I6YH05;A0A8I7BCM2;F2CQV1;F2CT87;F2CW03;F2CWQ6;F2D7B2;F2DJJ2;F2DMM2;F2E2B0;F2EIL0;F2EL27
GO:0009156	ribonucleoside monophosphate biosynthetic process	5	29	0.525101	0.918668	A0A8I6WKM0;A0A8I6X6B1;A0A8I6XD03;F2CWQ6;F2DJJ2
GO:0010876	lipid localization	5	29	0.525101	0.918668	F2CWC9;F2D9V7;F2DGM5;F2EEH9;Q5UNP2
GO:0045229	external encapsulating structure organization	5	29	0.525101	0.918668	A0A0U2GJJ3;A0A0U2GJL1;A0A8I6WS80;A0A8I6Y180;F2ELP4
GO:0071555	cell wall organization	5	29	0.525101	0.918668	A0A0U2GJJ3;A0A0U2GJL1;A0A8I6WS80;A0A8I6Y180;F2ELP4
GO:0000003	reproduction	10	60	0.527249	0.918668	A0A8I6WJN4;A0A8I6WQV8;A0A8I6WXG8;A0A8I6XBD2;A0A8I6XJN9;F2DZK3;F2E3X1;F2EKQ3;M0XNG3;Q673G6
GO:0006635	fatty acid beta-oxidation	4	23	0.532347	0.918668	A0A8I6XCQ2;A0A8I6XRG5;A0A8I6XUQ8;F2D1C6
GO:0045047	protein targeting to ER	4	23	0.532347	0.918668	A0A8I7B654;F2CV17;F2CWN4;F2DVC1
GO:0050801	ion homeostasis	4	23	0.532347	0.918668	A0A8I6XBH2;A0A8I6XQR9;F2CRK6;F2D2S2
GO:0051259	protein oligomerization	4	23	0.532347	0.918668	A0A8I6XJF2;A0A8I7B995;F2CU44;F2E4D2
GO:0070085	glycosylation	4	23	0.532347	0.918668	A0A8I6XH22;A0A8I6XH57;A0A8I6XRV2;A0A8I7BII2
GO:0072599	establishment of protein localization to endoplasmic reticulum	4	23	0.532347	0.918668	A0A8I7B654;F2CV17;F2CWN4;F2DVC1
GO:0006996	organelle organization	46	282	0.532673	0.918668	A0A287U5M5;A0A8I6WF91;A0A8I6WIA9;A0A8I6WMI1;A0A8I6WQV8;A0A8I6WTQ8;A0A8I6WV37;A0A8I6WWA9;A0A8I6X1I1;A0A8I6X2Y8;A0A8I6X8X0;A0A8I6XJN9;A0A8I6XUG0;A0A8I6YKQ7;A0A8I6YL06;A0A8I6YZG5;A0A8I6ZA75;A0A8I7B6R2;F2CT83;F2CUP3;F2CVM4;F2CXT5;F2D2Z9;F2D5K0;F2D6M6;F2DA66;F2DFA6;F2DIG1;F2DK52;F2DLN6;F2DNW4;F2DRI5;F2DVS7;F2DXB7;F2DZG4;F2E298;F2E2M2;F2E3J0;F2E3M7;F2E3X1;F2E405;F2EFV3;F2EHE1;F2EIG1;M0XN08;M0Y7Q2
GO:0001732	formation of cytoplasmic translation initiation complex	3	17	0.542311	0.918668	A0A8I6XWQ1;F2D788;F2DXD4
GO:0098660	inorganic ion transmembrane transport	3	17	0.542311	0.918668	F2CWF3;F2CWQ6;F2DJJ2
GO:0065003	macromolecular complex assembly	28	172	0.542622	0.918668	A0A287U5M5;A0A8I6WMI1;A0A8I6WV37;A0A8I6X0M9;A0A8I6X1I1;A0A8I6X7Q6;A0A8I6XBL4;A0A8I6XEM6;A0A8I6XEW3;A0A8I6XJF2;A0A8I6XWQ1;A0A8I6YL06;A0A8I6YZG5;A0A8I6ZA75;A0A8I7B995;F2CRK1;F2CU44;F2CUP3;F2CX02;F2D6M6;F2D788;F2DFA6;F2DK52;F2DXD4;F2E4D2;F2ECG8;F2ED67;F2EHE1
GO:0034654	nucleobase-containing compound biosynthetic process	22	135	0.543201	0.918668	A0A5C1YV39;A0A8I6WHD1;A0A8I6WKM0;A0A8I6X6B1;A0A8I6XCP7;A0A8I6XD03;A0A8I6XDB4;A0A8I6XEM6;A0A8I6Z4M3;A0A8I7B3E6;A0A8I7BBH0;A0A8I7BEI9;A1XXI9;F2CWQ6;F2D119;F2DJJ2;F2DUE6;F2ECG8;F2EHE1;F2EIL0;F2EJZ7;M0Y7Q2
GO:0019693	ribose phosphate metabolic process	21	129	0.54602	0.918668	A0A3S9KBF3;A0A5C1YV39;A0A8I6WKM0;A0A8I6WTI3;A0A8I6X6B1;A0A8I6XBW8;A0A8I6XD03;A0A8I6YH05;A0A8I7BCM2;F2CQV1;F2CT87;F2CW03;F2CWQ6;F2D119;F2D7B2;F2DJJ2;F2DMM2;F2DSU7;F2E2B0;F2EIL0;F2EL27
GO:0006399	tRNA metabolic process	6	36	0.548899	0.918668	A0A8I6WQV8;A0A8I6X472;F2E5S3;F2E941;F2EFV3;M0XNG3
GO:0048523	negative regulation of cellular process	10	61	0.549943	0.918668	A0A8I6WDS1;A0A8I6WV37;A0A8I6XJN9;A0A8I6YL06;A0A8I6Z9Z3;F2CQ03;F2D6M6;F2DZF2;F2EHE1;M0Y7Q2
GO:0051649	establishment of localization in cell	51	315	0.556615	0.918668	A0A287NWK0;A0A287Q7U2;A0A8I6WF91;A0A8I6WHM6;A0A8I6WIA9;A0A8I6WIT4;A0A8I6WMI1;A0A8I6WTJ0;A0A8I6WTQ8;A0A8I6X0Z2;A0A8I6X2Y8;A0A8I6X8X0;A0A8I6XBH2;A0A8I6XEC2;A0A8I6XLR3;A0A8I6XNN7;A0A8I6XZV6;A0A8I6Y690;A0A8I6YC75;A0A8I6YEZ5;A0A8I6YLT8;A0A8I6YXG1;A0A8I6Z7P9;A0A8I6ZAC4;A0A8I7B3D9;A0A8I7B654;F2CRN1;F2CT83;F2CV17;F2CWB3;F2CWN4;F2CXT5;F2D2Z9;F2D5K0;F2D6G3;F2D8K0;F2DA66;F2DGM5;F2DIG1;F2DJJ2;F2DKP3;F2DP42;F…
GO:0009414	response to water deprivation	5	30	0.557271	0.918668	A0A8I6XWW8;F2CPL2;F2EF30;Q43488;T1TD43
GO:0009415	response to water	5	30	0.557271	0.918668	A0A8I6XWW8;F2CPL2;F2EF30;Q43488;T1TD43
GO:0032870	cellular response to hormone stimulus	5	30	0.557271	0.918668	A0A8I6WXW1;A0A8I6Z4M3;A1XXI9;F2D7S9;F2DAR0
GO:0034440	lipid oxidation	5	30	0.557271	0.918668	A0A8I6XCQ2;A0A8I6XRG5;A0A8I6XUQ8;F2D1C6;F2DHZ5
GO:0048869	cellular developmental process	5	30	0.557271	0.918668	A0A287TWK6;A0A8I6Z1P9;A0A8I7B5R8;F2E3M7;Q673G6
GO:0051168	nuclear export	5	30	0.557271	0.918668	A0A8I6WIT4;A0A8I6YLT8;F2D6G3;F2D8K0;F2E4I7
GO:0005985	sucrose metabolic process	2	11	0.557925	0.918668	A0A8I6XI70;Q4A1H2
GO:0006188	IMP biosynthetic process	2	11	0.557925	0.918668	A0A8I6X6B1;A0A8I6XD03
GO:0009312	oligosaccharide biosynthetic process	2	11	0.557925	0.918668	A0A8I6XI70;F2DQH1
GO:0009991	response to extracellular stimulus	2	11	0.557925	0.918668	F2E0P9;F2E3X1
GO:0010557	positive regulation of macromolecule biosynthetic process	2	11	0.557925	0.918668	A0A8I6XEF6;A1XXI9
GO:0031123	RNA 3'-end processing	2	11	0.557925	0.918668	F2CS23;F2DDD5
GO:0031328	positive regulation of cellular biosynthetic process	2	11	0.557925	0.918668	A0A8I6XEF6;A1XXI9
GO:0051648	vesicle localization	2	11	0.557925	0.918668	A0A8I6WTQ8;A0A8I6ZAC4
GO:0051650	establishment of vesicle localization	2	11	0.557925	0.918668	A0A8I6WTQ8;A0A8I6ZAC4
GO:0009150	purine ribonucleotide metabolic process	16	99	0.562857	0.918668	A0A5C1YV39;A0A8I6WTI3;A0A8I6X6B1;A0A8I6XBW8;A0A8I6XD03;A0A8I6YH05;A0A8I7BCM2;F2CQV1;F2CT87;F2CW03;F2CWQ6;F2D7B2;F2DJJ2;F2DMM2;F2E2B0;F2EL27
GO:0006626	protein targeting to mitochondrion	4	24	0.568127	0.918668	A0A8I6WIA9;F2CXT5;F2DIG1;F2E405
GO:0010604	positive regulation of macromolecule metabolic process	4	24	0.568127	0.918668	A0A8I6XEF6;A0A8I6YIV5;A1XXI9;F2E3M7
GO:0070585	protein localization to mitochondrion	4	24	0.568127	0.918668	A0A8I6WIA9;F2CXT5;F2DIG1;F2E405
GO:0072655	establishment of protein localization to mitochondrion	4	24	0.568127	0.918668	A0A8I6WIA9;F2CXT5;F2DIG1;F2E405
GO:0009132	nucleoside diphosphate metabolic process	6	37	0.577543	0.918668	A0A8I6WHD1;A0A8I6XBW8;A0A8I7BCM2;F2CQV1;F2CW03;F2EIL0
GO:0009409	response to cold	6	37	0.577543	0.918668	A0A8I6XWW8;F2E4I7;F2EF30;Q43488;Q7XZK3;T1TD43
GO:0046907	intracellular transport	49	305	0.581212	0.918668	A0A287NWK0;A0A287Q7U2;A0A8I6WF91;A0A8I6WHM6;A0A8I6WIA9;A0A8I6WIT4;A0A8I6WMI1;A0A8I6WTJ0;A0A8I6WTQ8;A0A8I6X2Y8;A0A8I6X8X0;A0A8I6XBH2;A0A8I6XEC2;A0A8I6XLR3;A0A8I6XNN7;A0A8I6XZV6;A0A8I6Y690;A0A8I6YC75;A0A8I6YEZ5;A0A8I6YLT8;A0A8I6Z7P9;A0A8I6ZAC4;A0A8I7B3D9;A0A8I7B654;F2CRN1;F2CT83;F2CV17;F2CWB3;F2CWN4;F2CXT5;F2D2Z9;F2D5K0;F2D6G3;F2D8K0;F2DA66;F2DGM5;F2DIG1;F2DJJ2;F2DKP3;F2DP42;F2DRI5;F2DVC1;F2DVS7;F2…
GO:0007031	peroxisome organization	3	18	0.583293	0.918668	A0A8I6WF91;F2CXT5;F2E3X1
GO:0009793	embryo development ending in seed dormancy	3	18	0.583293	0.918668	A0A8I6WXG8;F2DZK3;F2EKQ3
GO:0016226	iron-sulfur cluster assembly	3	18	0.583293	0.918668	A0A8I6YIK8;F2D5L4;F2E4D2
GO:0031163	metallo-sulfur cluster assembly	3	18	0.583293	0.918668	A0A8I6YIK8;F2D5L4;F2E4D2
GO:0032940	secretion by cell	3	18	0.583293	0.918668	A0A8I6X0Z2;A0A8I6YXG1;A0A8I6ZAC4
GO:0046903	secretion	3	18	0.583293	0.918668	A0A8I6X0Z2;A0A8I6YXG1;A0A8I6ZAC4
GO:0051668	localization within membrane	3	18	0.583293	0.918668	A0A8I6WMI1;A0A8I6WTQ8;F2DVS7
GO:1902591	single-organism membrane budding	3	18	0.583293	0.918668	A0A8I6WMI1;A0A8I6WTQ8;F2DVS7
GO:0071495	cellular response to endogenous stimulus	5	31	0.588329	0.918668	A0A8I6WXW1;A0A8I6Z4M3;A1XXI9;F2D7S9;F2DAR0
GO:0044765	single-organism transport	50	312	0.58966	0.918668	A0A287NWK0;A0A8I6WF91;A0A8I6WHM6;A0A8I6WIA9;A0A8I6WIT4;A0A8I6WMI1;A0A8I6WTQ8;A0A8I6X0Z2;A0A8I6X2Y8;A0A8I6XBH2;A0A8I6XEC2;A0A8I6XLR3;A0A8I6XNN7;A0A8I6Y690;A0A8I6YC75;A0A8I6YLT8;A0A8I6YXG1;A0A8I6ZAC4;A0A8I7B3D9;A0A8I7B654;F2CRN1;F2CT83;F2CV17;F2CWB3;F2CWC9;F2CWF3;F2CWN4;F2CWQ6;F2CXT5;F2D2Z9;F2D5K0;F2D6G3;F2D8K0;F2D9V7;F2DA66;F2DG80;F2DGM5;F2DIG1;F2DJJ2;F2DP42;F2DVC1;F2DVS7;F2DXG7;F2E298;F2E3M7;F2E3…
GO:0000160	phosphorelay signal transduction system	1	5	0.590399	0.918668	A0A8I6WXW1
GO:0000266	mitochondrial fission	1	5	0.590399	0.918668	F2E3X1
GO:0000290	deadenylation-dependent decapping of nuclear-transcribed mRNA	1	5	0.590399	0.918668	A0A8I6YF06
GO:0001934	positive regulation of protein phosphorylation	1	5	0.590399	0.918668	A0A8I6YIV5
GO:0005986	sucrose biosynthetic process	1	5	0.590399	0.918668	A0A8I6XI70
GO:0005991	trehalose metabolic process	1	5	0.590399	0.918668	F2DQH1
GO:0005992	trehalose biosynthetic process	1	5	0.590399	0.918668	F2DQH1
GO:0006289	nucleotide-excision repair	1	5	0.590399	0.918668	F2DUJ6
GO:0006515	misfolded or incompletely synthesized protein catabolic process	1	5	0.590399	0.918668	F2E6T9
GO:0006621	protein retention in ER lumen	1	5	0.590399	0.918668	F2CWB3
GO:0006893	Golgi to plasma membrane transport	1	5	0.590399	0.918668	A0A8I6ZAC4
GO:0006955	immune response	1	5	0.590399	0.918668	A0A8I6XTL4
GO:0006995	cellular response to nitrogen starvation	1	5	0.590399	0.918668	F2E0P9
GO:0006998	nuclear envelope organization	1	5	0.590399	0.918668	A0A8I7B6R2
GO:0007032	endosome organization	1	5	0.590399	0.918668	F2DVS7
GO:0007399	nervous system development	1	5	0.590399	0.918668	F2E3M7
GO:0009438	methylglyoxal metabolic process	1	5	0.590399	0.918668	A0A8I6XQ26
GO:0009636	response to toxic substance	1	5	0.590399	0.918668	F2CQX6
GO:0009639	response to red or far red light	1	5	0.590399	0.918668	A0A8I6XCP7
GO:0009734	auxin-activated signaling pathway	1	5	0.590399	0.918668	A0A8I6Z4M3
GO:0009744	response to sucrose	1	5	0.590399	0.918668	F2DSZ9
GO:0009826	unidimensional cell growth	1	5	0.590399	0.918668	Q673G6
GO:0010562	positive regulation of phosphorus metabolic process	1	5	0.590399	0.918668	A0A8I6YIV5
GO:0015849	organic acid transport	1	5	0.590399	0.918668	A0A8I7B3D9
GO:0016556	mRNA modification	1	5	0.590399	0.918668	F2DDD5
GO:0016558	protein import into peroxisome matrix	1	5	0.590399	0.918668	A0A8I6WF91
GO:0019243	methylglyoxal catabolic process to D-lactate via S-lactoyl-glutathione	1	5	0.590399	0.918668	A0A8I6XQ26
GO:0019953	sexual reproduction	1	5	0.590399	0.918668	A0A8I6WJN4
GO:0030203	glycosaminoglycan metabolic process	1	5	0.590399	0.918668	A0A8I7B5I9
GO:0030388	fructose 1,6-bisphosphate metabolic process	1	5	0.590399	0.918668	A0A8I6XBW8
GO:0031122	cytoplasmic microtubule organization	1	5	0.590399	0.918668	F2E2M2
GO:0031401	positive regulation of protein modification process	1	5	0.590399	0.918668	A0A8I6YIV5
GO:0033260	nuclear DNA replication	1	5	0.590399	0.918668	A0A8I6WDS1
GO:0034285	response to disaccharide	1	5	0.590399	0.918668	F2DSZ9
GO:0035437	maintenance of protein localization in endoplasmic reticulum	1	5	0.590399	0.918668	F2CWB3
GO:0040008	regulation of growth	1	5	0.590399	0.918668	Q673G6
GO:0042182	ketone catabolic process	1	5	0.590399	0.918668	A0A8I6XQ26
GO:0042327	positive regulation of phosphorylation	1	5	0.590399	0.918668	A0A8I6YIV5
GO:0042776	mitochondrial ATP synthesis coupled proton transport	1	5	0.590399	0.918668	F2DJJ2
GO:0043171	peptide catabolic process	1	5	0.590399	0.918668	A0A8I6WT04
GO:0043248	proteasome assembly	1	5	0.590399	0.918668	F2CX02
GO:0044205	'de novo' UMP biosynthetic process	1	5	0.590399	0.918668	A0A8I6WKM0
GO:0044786	cell cycle DNA replication	1	5	0.590399	0.918668	A0A8I6WDS1
GO:0045892	negative regulation of transcription, DNA-templated	1	5	0.590399	0.918668	M0Y7Q2
GO:0045937	positive regulation of phosphate metabolic process	1	5	0.590399	0.918668	A0A8I6YIV5
GO:0046655	folic acid metabolic process	1	5	0.590399	0.918668	F2DYM4
GO:0046942	carboxylic acid transport	1	5	0.590399	0.918668	A0A8I7B3D9
GO:0051050	positive regulation of transport	1	5	0.590399	0.918668	F2E3M7
GO:0051220	cytoplasmic sequestering of protein	1	5	0.590399	0.918668	F2CWB3
GO:0051321	meiotic cell cycle	1	5	0.590399	0.918668	A0A8I6XJN9
GO:0051596	methylglyoxal catabolic process	1	5	0.590399	0.918668	A0A8I6XQ26
GO:0055088	lipid homeostasis	1	5	0.590399	0.918668	A0A8I6YMC3
GO:0061136	regulation of proteasomal protein catabolic process	1	5	0.590399	0.918668	A0A8I6XJN9
GO:0061727	methylglyoxal catabolic process to lactate	1	5	0.590399	0.918668	A0A8I6XQ26
GO:0070413	trehalose metabolism in response to stress	1	5	0.590399	0.918668	F2DQH1
GO:0071365	cellular response to auxin stimulus	1	5	0.590399	0.918668	A0A8I6Z4M3
GO:0072595	maintenance of protein localization in organelle	1	5	0.590399	0.918668	F2CWB3
GO:1901292	nucleoside phosphate catabolic process	1	5	0.590399	0.918668	A0A8I7BBH0
GO:1902679	negative regulation of RNA biosynthetic process	1	5	0.590399	0.918668	M0Y7Q2
GO:1903050	regulation of proteolysis involved in cellular protein catabolic process	1	5	0.590399	0.918668	A0A8I6XJN9
GO:1903362	regulation of cellular protein catabolic process	1	5	0.590399	0.918668	A0A8I6XJN9
GO:1903507	negative regulation of nucleic acid-templated transcription	1	5	0.590399	0.918668	M0Y7Q2
GO:0002181	cytoplasmic translation	7	44	0.594822	0.923652	A0A8I6WB19;A0A8I6XWQ1;F2CT73;F2D558;F2D788;F2DAK3;F2DXD4
GO:0009260	ribonucleotide biosynthetic process	7	44	0.594822	0.923652	A0A5C1YV39;A0A8I6WKM0;A0A8I6X6B1;A0A8I6XD03;F2CWQ6;F2DJJ2;F2EIL0
GO:0006753	nucleoside phosphate metabolic process	23	145	0.599804	0.930434	A0A3S9KBF3;A0A5C1YV39;A0A8I6WHD1;A0A8I6WKM0;A0A8I6WTI3;A0A8I6X6B1;A0A8I6XBW8;A0A8I6XD03;A0A8I6YH05;A0A8I7BBH0;A0A8I7BCM2;F2CQV1;F2CT87;F2CW03;F2CWQ6;F2D119;F2D7B2;F2DJJ2;F2DMM2;F2DSU7;F2E2B0;F2EIL0;F2EL27
GO:0009893	positive regulation of metabolic process	4	25	0.602339	0.931589	A0A8I6XEF6;A0A8I6YIV5;A1XXI9;F2E3M7
GO:0061025	membrane fusion	4	25	0.602339	0.931589	A0A8I6X8X0;A0A8I7B6R2;F2DRI5;F2E298
GO:0030258	lipid modification	6	38	0.605251	0.931589	A0A8I6XCQ2;A0A8I6XRG5;A0A8I6XUQ8;A0A8I6YMC3;F2D1C6;F2DHZ5
GO:0006206	pyrimidine nucleobase metabolic process	2	12	0.607367	0.931589	A0A8I6WKM0;F2EIL0
GO:0007033	vacuole organization	2	12	0.607367	0.931589	A0A8I7B6R2;F2D5K0
GO:0009145	purine nucleoside triphosphate biosynthetic process	2	12	0.607367	0.931589	F2CWQ6;F2DJJ2
GO:0009206	purine ribonucleoside triphosphate biosynthetic process	2	12	0.607367	0.931589	F2CWQ6;F2DJJ2
GO:0009891	positive regulation of biosynthetic process	2	12	0.607367	0.931589	A0A8I6XEF6;A1XXI9
GO:0046040	IMP metabolic process	2	12	0.607367	0.931589	A0A8I6X6B1;A0A8I6XD03
GO:0046364	monosaccharide biosynthetic process	2	12	0.607367	0.931589	F2CQV1;F2DEG9
GO:0060341	regulation of cellular localization	2	12	0.607367	0.931589	F2E3M7;M0XN08
GO:0006952	defense response	11	70	0.607933	0.931589	A0A8I6XTL4;A0A8I6Z9Z3;A0A8I7B6N5;A0A8I7BCT1;F2CUF5;F2DAR0;F2DE94;F2DGM5;F2DZN2;F2E5X4;F2EGM1
GO:0061024	membrane organization	17	108	0.609679	0.932868	A0A8I6WMI1;A0A8I6WTQ8;A0A8I6WWA9;A0A8I6X8X0;A0A8I6ZAC4;A0A8I7B6R2;F2CT83;F2CV17;F2CWN4;F2CYK2;F2D2Z9;F2DA66;F2DRI5;F2DVS7;F2E298;F2E3J0;M0XN08
GO:0032268	regulation of cellular protein metabolic process	8	51	0.609999	0.932868	A0A8I6XEF6;A0A8I6XJN9;A0A8I6YIV5;A0A8I6Z9Z3;A0A8I7BE86;F2CQ03;F2D6M6;F2DZF2
GO:0051641	cellular localization	53	333	0.613918	0.934443	A0A287NWK0;A0A287Q7U2;A0A8I6WF91;A0A8I6WHM6;A0A8I6WIA9;A0A8I6WIT4;A0A8I6WMI1;A0A8I6WTJ0;A0A8I6WTQ8;A0A8I6X0Z2;A0A8I6X2Y8;A0A8I6X8X0;A0A8I6XBH2;A0A8I6XEC2;A0A8I6XLR3;A0A8I6XNN7;A0A8I6XZV6;A0A8I6Y690;A0A8I6YC75;A0A8I6YEZ5;A0A8I6YLT8;A0A8I6YXG1;A0A8I6Z7P9;A0A8I6ZAC4;A0A8I7B3D9;A0A8I7B654;F2CRN1;F2CT83;F2CV17;F2CWB3;F2CWN4;F2CXT5;F2CYK2;F2D2Z9;F2D5K0;F2D6G3;F2D8K0;F2DA66;F2DGM5;F2DIG1;F2DJJ2;F2DKP3;F…
GO:1902578	single-organism localization	52	327	0.61598	0.934443	A0A287NWK0;A0A8I6WF91;A0A8I6WHM6;A0A8I6WIA9;A0A8I6WIT4;A0A8I6WMI1;A0A8I6WTQ8;A0A8I6X0Z2;A0A8I6X2Y8;A0A8I6XBH2;A0A8I6XEC2;A0A8I6XLR3;A0A8I6XNN7;A0A8I6Y690;A0A8I6YC75;A0A8I6YLT8;A0A8I6YXG1;A0A8I6ZAC4;A0A8I7B3D9;A0A8I7B654;F2CRN1;F2CT83;F2CV17;F2CWB3;F2CWC9;F2CWF3;F2CWN4;F2CWQ6;F2CXT5;F2CYK2;F2D2Z9;F2D5K0;F2D6G3;F2D8K0;F2D9V7;F2DA66;F2DG80;F2DGM5;F2DIG1;F2DJJ2;F2DP42;F2DVC1;F2DVS7;F2DXG7;F2E298;F2E3…
GO:0070925	organelle assembly	5	32	0.618161	0.934443	A0A8I6X1I1;A0A8I7B6R2;F2D6M6;F2DFA6;F2DVS7
GO:1901576	organic substance biosynthetic process	103	643	0.620456	0.934443	A0A287EZS0;A0A2P1AB13;A0A5C1YV39;A0A8I6WB19;A0A8I6WDS1;A0A8I6WHD1;A0A8I6WKM0;A0A8I6WQV8;A0A8I6WWJ7;A0A8I6X6B1;A0A8I6XCP7;A0A8I6XD03;A0A8I6XDB4;A0A8I6XEF6;A0A8I6XEM6;A0A8I6XFM9;A0A8I6XH22;A0A8I6XH57;A0A8I6XI70;A0A8I6XPB3;A0A8I6XRV2;A0A8I6XUG0;A0A8I6XWQ1;A0A8I6Y4J8;A0A8I6YFL0;A0A8I6YFN2;A0A8I6YHI9;A0A8I6YQI6;A0A8I6YQU0;A0A8I6YWJ4;A0A8I6Z4M3;A0A8I6Z9Z3;A0A8I7B3E6;A0A8I7B4C5;A0A8I7BBH0;A0A8I7BE86;A0A…
GO:0002183	cytoplasmic translational initiation	3	19	0.621869	0.934443	A0A8I6XWQ1;F2D788;F2DXD4
GO:0005982	starch metabolic process	3	19	0.621869	0.934443	A0A2P1AB13;A0A8I7BFU9;C3W8L3
GO:0006541	glutamine metabolic process	3	19	0.621869	0.934443	A0A8I6X6B1;A0A8I6Y4J8;F2E3I7
GO:0006906	vesicle fusion	3	19	0.621869	0.934443	A0A8I6X8X0;F2DRI5;F2E298
GO:0009084	glutamine family amino acid biosynthetic process	3	19	0.621869	0.934443	A0A8I6Y4J8;F2CW53;F2E3I7
GO:0009790	embryo development	3	19	0.621869	0.934443	A0A8I6WXG8;F2DZK3;F2EKQ3
GO:0016052	carbohydrate catabolic process	17	109	0.625986	0.934443	A0A287ILG2;A0A8I6W6F0;A0A8I6WS80;A0A8I6XBW8;A0A8I6XH57;A0A8I6XUU4;A0A8I6Y7K8;A0A8I6YF87;A0A8I6YIR4;A0A8I6YK25;A0A8I7BCM2;A0A8I7BFU9;F2CQV1;F2CW03;F2EFV1;F2ELP4;Q42835
GO:0065008	regulation of biological quality	17	109	0.625986	0.934443	A0A8I6WHE5;A0A8I6WKG3;A0A8I6WT04;A0A8I6XBH2;A0A8I6XQR9;A0A8I6XTB9;A0A8I6YMC3;A0A8I6YT49;A0A8I7B2U1;A0A8I7B659;A0A8I7BAE7;F2CQ03;F2CQX6;F2CRK6;F2CW03;F2CWB3;F2D2S2
GO:0043933	macromolecular complex subunit organization	33	210	0.631335	0.934443	A0A287U5M5;A0A8I6WMI1;A0A8I6WV37;A0A8I6X0M9;A0A8I6X1I1;A0A8I6X7Q6;A0A8I6XBL4;A0A8I6XEF6;A0A8I6XEM6;A0A8I6XEW3;A0A8I6XJF2;A0A8I6XWQ1;A0A8I6Y871;A0A8I6YKQ7;A0A8I6YL06;A0A8I6YZG5;A0A8I6ZA75;A0A8I7B995;F2CRK1;F2CU44;F2CUP3;F2CX02;F2D6M6;F2D788;F2DFA6;F2DK52;F2DXD4;F2E2M2;F2E4D2;F2ECG8;F2ED67;F2EHE1;M0Y7Q2
GO:1901362	organic cyclic compound biosynthetic process	33	210	0.631335	0.934443	A0A5C1YV39;A0A8I6WHD1;A0A8I6WKM0;A0A8I6X6B1;A0A8I6XCP7;A0A8I6XD03;A0A8I6XDB4;A0A8I6XEM6;A0A8I6XFM9;A0A8I6YFL0;A0A8I6YHI9;A0A8I6YQI6;A0A8I6YQU0;A0A8I6Z4M3;A0A8I7B3E6;A0A8I7BBH0;A0A8I7BEI9;A0A8I7BJR0;A1XXI9;F2CPM4;F2CWQ6;F2D119;F2DC91;F2DJJ2;F2DUE6;F2DYM4;F2E7V8;F2ECG8;F2EDT9;F2EHE1;F2EIL0;F2EJZ7;M0Y7Q2
GO:0072522	purine-containing compound biosynthetic process	6	39	0.631943	0.934443	A0A5C1YV39;A0A8I6X6B1;A0A8I6XD03;F2CWQ6;F2D119;F2DJJ2
GO:0009072	aromatic amino acid family metabolic process	4	26	0.634865	0.934443	A0A8I6YFL0;A0A8I6YHI9;A0A8I6YTX6;A0A8I7BJR0
GO:0009266	response to temperature stimulus	14	91	0.643571	0.934443	A0A8I6XJF2;A0A8I6XWW8;A0A8I6YT49;A0A8I7B995;F2CPL2;F2CU44;F2D6M8;F2DAW4;F2E4I7;F2EF30;F2EFK9;Q43488;Q7XZK3;T1TD43
GO:0044242	cellular lipid catabolic process	5	33	0.646683	0.934443	A0A8I6XCQ2;A0A8I6XRG5;A0A8I6XUQ8;F2D1C6;F2DHZ5
GO:0044743	intracellular protein transmembrane import	5	33	0.646683	0.934443	A0A8I6WF91;A0A8I6WIA9;F2CXT5;F2DIG1;F2E405
GO:0098542	defense response to other organism	5	33	0.646683	0.934443	A0A8I6XTL4;A0A8I7BCT1;F2DE94;F2DGM5;F2EGM1
GO:0006012	galactose metabolic process	2	13	0.652494	0.934443	A0A287ILG2;A0A8I6YK25
GO:0006613	cotranslational protein targeting to membrane	2	13	0.652494	0.934443	F2CV17;F2CWN4
GO:0006614	SRP-dependent cotranslational protein targeting to membrane	2	13	0.652494	0.934443	F2CV17;F2CWN4
GO:0006818	hydrogen transport	2	13	0.652494	0.934443	F2CWQ6;F2DJJ2
GO:0009894	regulation of catabolic process	2	13	0.652494	0.934443	A0A8I6XJN9;F2DC93
GO:0014070	response to organic cyclic compound	2	13	0.652494	0.934443	F2CPL2;F2DGM5
GO:0015992	proton transport	2	13	0.652494	0.934443	F2CWQ6;F2DJJ2
GO:0016114	terpenoid biosynthetic process	2	13	0.652494	0.934443	F2DZK7;Q673G6
GO:0019320	hexose catabolic process	2	13	0.652494	0.934443	A0A287ILG2;A0A8I6YK25
GO:0042398	cellular modified amino acid biosynthetic process	2	13	0.652494	0.934443	F2DR63;F2DYM4
GO:0043650	dicarboxylic acid biosynthetic process	2	13	0.652494	0.934443	A0A8I6WWJ7;F2DYM4
GO:1902600	hydrogen ion transmembrane transport	2	13	0.652494	0.934443	F2CWQ6;F2DJJ2
GO:0000045	autophagosome assembly	1	6	0.657442	0.934443	A0A8I7B6R2
GO:0000460	maturation of 5.8S rRNA	1	6	0.657442	0.934443	F2CS23
GO:0001678	cellular glucose homeostasis	1	6	0.657442	0.934443	F2CW03
GO:0001731	formation of translation preinitiation complex	1	6	0.657442	0.934443	A0A8I6XWQ1
GO:0001932	regulation of protein phosphorylation	1	6	0.657442	0.934443	A0A8I6YIV5
GO:0006002	fructose 6-phosphate metabolic process	1	6	0.657442	0.934443	A0A8I7B1F6
GO:0006102	isocitrate metabolic process	1	6	0.657442	0.934443	F2DS63
GO:0006301	postreplication repair	1	6	0.657442	0.934443	F2CQH9
GO:0006465	signal peptide processing	1	6	0.657442	0.934443	A0A8I7B654
GO:0006468	protein phosphorylation	1	6	0.657442	0.934443	A0A8I6YIV5
GO:0006538	glutamate catabolic process	1	6	0.657442	0.934443	F2E0P9
GO:0006566	threonine metabolic process	1	6	0.657442	0.934443	F2E2C7
GO:0006568	tryptophan metabolic process	1	6	0.657442	0.934443	A0A8I6YTX6
GO:0006586	indolalkylamine metabolic process	1	6	0.657442	0.934443	A0A8I6YTX6
GO:0006928	movement of cell or subcellular component	1	6	0.657442	0.934443	A0A8I6YCQ1
GO:0009051	pentose-phosphate shunt, oxidative branch	1	6	0.657442	0.934443	A0A3S9KBF3
GO:0009642	response to light intensity	1	6	0.657442	0.934443	F2CPL2
GO:0009733	response to auxin	1	6	0.657442	0.934443	A0A8I6Z4M3
GO:0009834	plant-type secondary cell wall biogenesis	1	6	0.657442	0.934443	F2DIP6
GO:0009908	flower development	1	6	0.657442	0.934443	Q673G6
GO:0010639	negative regulation of organelle organization	1	6	0.657442	0.934443	A0A8I6XJN9
GO:0016559	peroxisome fission	1	6	0.657442	0.934443	F2E3X1
GO:0017004	cytochrome complex assembly	1	6	0.657442	0.934443	F2DK52
GO:0019684	photosynthesis, light reaction	1	6	0.657442	0.934443	F2CRK1
GO:0030968	endoplasmic reticulum unfolded protein response	1	6	0.657442	0.934443	A0A8I6Y5Z0
GO:0031204	posttranslational protein targeting to membrane, translocation	1	6	0.657442	0.934443	F2CV17
GO:0032970	regulation of actin filament-based process	1	6	0.657442	0.934443	A0A8I6XEP9
GO:0033500	carbohydrate homeostasis	1	6	0.657442	0.934443	F2CW03
GO:0042325	regulation of phosphorylation	1	6	0.657442	0.934443	A0A8I6YIV5
GO:0042593	glucose homeostasis	1	6	0.657442	0.934443	F2CW03
GO:0043244	regulation of protein complex disassembly	1	6	0.657442	0.934443	A0A8I6XEF6
GO:0043487	regulation of RNA stability	1	6	0.657442	0.934443	F2CQ03
GO:0043488	regulation of mRNA stability	1	6	0.657442	0.934443	F2CQ03
GO:0043562	cellular response to nitrogen levels	1	6	0.657442	0.934443	F2E0P9
GO:0046434	organophosphate catabolic process	1	6	0.657442	0.934443	A0A8I7BBH0
GO:0046487	glyoxylate metabolic process	1	6	0.657442	0.934443	A0A8I6XFM0
GO:0048868	pollen tube development	1	6	0.657442	0.934443	A0A8I6XBD2
GO:0051129	negative regulation of cellular component organization	1	6	0.657442	0.934443	A0A8I6XJN9
GO:0051253	negative regulation of RNA metabolic process	1	6	0.657442	0.934443	M0Y7Q2
GO:0098656	anion transmembrane transport	1	6	0.657442	0.934443	F2DG80
GO:1903649	regulation of cytoplasmic transport	1	6	0.657442	0.934443	F2E3M7
GO:0006897	endocytosis	3	20	0.657937	0.934443	A0A8I6X017;A0A8I6XZV6;A0A8I6Z7P9
GO:0009250	glucan biosynthetic process	3	20	0.657937	0.934443	A0A2P1AB13;A0A8I7BFU9;C3W8L3
GO:0048285	organelle fission	3	20	0.657937	0.934443	A0A8I6XJN9;F2DNW4;F2E3X1
GO:0009117	nucleotide metabolic process	22	143	0.660452	0.937137	A0A3S9KBF3;A0A5C1YV39;A0A8I6WHD1;A0A8I6WKM0;A0A8I6WTI3;A0A8I6X6B1;A0A8I6XBW8;A0A8I6XD03;A0A8I6YH05;A0A8I7BBH0;A0A8I7BCM2;F2CQV1;F2CT87;F2CW03;F2CWQ6;F2D119;F2D7B2;F2DJJ2;F2DMM2;F2E2B0;F2EIL0;F2EL27
GO:0006413	translational initiation	4	27	0.665623	0.941401	A0A8I6XWQ1;F2CZL7;F2D788;F2DXD4
GO:1901701	cellular response to oxygen-containing compound	4	27	0.665623	0.941401	A1XXI9;F2CQX6;F2D7S9;F2DAR0
GO:0072521	purine-containing compound metabolic process	17	112	0.672894	0.941401	A0A5C1YV39;A0A8I6WTI3;A0A8I6X6B1;A0A8I6XBW8;A0A8I6XD03;A0A8I6YH05;A0A8I7BCM2;F2CQV1;F2CT87;F2CW03;F2CWQ6;F2D119;F2D7B2;F2DJJ2;F2DMM2;F2E2B0;F2EL27
GO:0018130	heterocycle biosynthetic process	28	182	0.67295	0.941401	A0A5C1YV39;A0A8I6WHD1;A0A8I6WKM0;A0A8I6X6B1;A0A8I6XCP7;A0A8I6XD03;A0A8I6XDB4;A0A8I6XEM6;A0A8I6XFM9;A0A8I6YQI6;A0A8I6YQU0;A0A8I6Z4M3;A0A8I7B3E6;A0A8I7BBH0;A0A8I7BEI9;A1XXI9;F2CWQ6;F2D119;F2DC91;F2DJJ2;F2DUE6;F2DYM4;F2ECG8;F2EDT9;F2EHE1;F2EIL0;F2EJZ7;M0Y7Q2
GO:0009152	purine ribonucleotide biosynthetic process	5	34	0.673831	0.941401	A0A5C1YV39;A0A8I6X6B1;A0A8I6XD03;F2CWQ6;F2DJJ2
GO:0048522	positive regulation of cellular process	5	34	0.673831	0.941401	A0A8I6XEF6;A0A8I6YIV5;A1XXI9;F2E3M7;M0XN08
GO:0032787	monocarboxylic acid metabolic process	22	144	0.674014	0.941401	A0A5C1YV39;A0A8I6WT14;A0A8I6XBW8;A0A8I6XCQ2;A0A8I6XFM0;A0A8I6XQ26;A0A8I6XRG5;A0A8I6XUQ8;A0A8I6YFN2;A0A8I6YQI6;A0A8I6Z0L1;A0A8I7BCM2;F2CQV1;F2CW03;F2D1C6;F2DHZ5;F2DR63;F2DSA8;F2DSZ9;F2EDT9;F2ELT5;M0YR50
GO:0008652	cellular amino acid biosynthetic process	14	93	0.677209	0.941401	A0A8I6WWJ7;A0A8I6XFM9;A0A8I6XPB3;A0A8I6Y4J8;A0A8I6YFL0;A0A8I6YHI9;A0A8I6YWJ4;A0A8I7B4C5;A0A8I7BJR0;F2CW53;F2D643;F2DYM4;F2E2C7;F2E3I7
GO:0009119	ribonucleoside metabolic process	16	106	0.67922	0.941401	A0A5C1YV39;A0A8I6WKM0;A0A8I6WTI3;A0A8I6XBW8;A0A8I6YH05;A0A8I7BCM2;F2CQV1;F2CT87;F2CW03;F2CWQ6;F2D7B2;F2DJJ2;F2DMM2;F2E2B0;F2EIL0;F2EL27
GO:0016567	protein ubiquitination	6	41	0.682036	0.941401	A0A8I6X0M9;A0A8I6X7M2;A0A8I6XJN9;A0A8I6YNI8;F2CQH9;F2D7S9
GO:0009628	response to abiotic stimulus	19	126	0.690003	0.941401	A0A8I6XCP7;A0A8I6XJF2;A0A8I6XWW8;A0A8I6YT49;A0A8I7B3E6;A0A8I7B995;F2CPL2;F2CU44;F2D6M8;F2DAW4;F2DSZ9;F2DXX0;F2E4I7;F2EF30;F2EFK9;Q43488;Q673G6;Q7XZK3;T1TD43
GO:0022613	ribonucleoprotein complex biogenesis	19	126	0.690003	0.941401	A0A8I6X1I1;A0A8I6X472;A0A8I6XD40;A0A8I6XEW3;A0A8I6XWQ1;A0A8I6YSL3;F2CQY5;F2CRA3;F2CS23;F2D483;F2D6M6;F2D702;F2D788;F2DDD5;F2DFA6;F2DXD4;F2E0C0;F2E556;F2EG94
GO:0006260	DNA replication	3	21	0.691462	0.941401	A0A287EZS0;A0A8I6WDS1;F2D0W0
GO:0006812	cation transport	3	21	0.691462	0.941401	F2CWF3;F2CWQ6;F2DJJ2
GO:0031325	positive regulation of cellular metabolic process	3	21	0.691462	0.941401	A0A8I6XEF6;A0A8I6YIV5;A1XXI9
GO:0005976	polysaccharide metabolic process	12	81	0.69318	0.941401	A0A2P1AB13;A0A8I6W6F0;A0A8I6WS80;A0A8I6XH57;A0A8I6Y7K8;A0A8I6YF87;A0A8I6YIR4;A0A8I7BFU9;C3W8L3;F2EFV1;F2ELP4;Q42835
GO:0006213	pyrimidine nucleoside metabolic process	2	14	0.693393	0.941401	A0A8I6WKM0;F2EIL0
GO:0007030	Golgi organization	2	14	0.693393	0.941401	A0A8I6X2Y8;A0A8I7B6R2
GO:0009201	ribonucleoside triphosphate biosynthetic process	2	14	0.693393	0.941401	F2CWQ6;F2DJJ2
GO:0009218	pyrimidine ribonucleotide metabolic process	2	14	0.693393	0.941401	A0A8I6WKM0;F2EIL0
GO:0009220	pyrimidine ribonucleotide biosynthetic process	2	14	0.693393	0.941401	A0A8I6WKM0;F2EIL0
GO:0009738	abscisic acid-activated signaling pathway	2	14	0.693393	0.941401	A1XXI9;F2DAR0
GO:0015979	photosynthesis	2	14	0.693393	0.941401	F2CRK1;F2DC91
GO:0046131	pyrimidine ribonucleoside metabolic process	2	14	0.693393	0.941401	A0A8I6WKM0;F2EIL0
GO:0046132	pyrimidine ribonucleoside biosynthetic process	2	14	0.693393	0.941401	A0A8I6WKM0;F2EIL0
GO:0046134	pyrimidine nucleoside biosynthetic process	2	14	0.693393	0.941401	A0A8I6WKM0;F2EIL0
GO:0046365	monosaccharide catabolic process	2	14	0.693393	0.941401	A0A287ILG2;A0A8I6YK25
GO:0071215	cellular response to abscisic acid stimulus	2	14	0.693393	0.941401	A1XXI9;F2DAR0
GO:0010558	negative regulation of macromolecule biosynthetic process	4	28	0.694567	0.941401	A0A8I6Z9Z3;F2CQ03;F2D6M6;M0Y7Q2
GO:0055082	cellular chemical homeostasis	4	28	0.694567	0.941401	A0A8I6XQR9;F2CRK6;F2CW03;F2D2S2
GO:2000113	negative regulation of cellular macromolecule biosynthetic process	4	28	0.694567	0.941401	A0A8I6Z9Z3;F2CQ03;F2D6M6;M0Y7Q2
GO:0044257	cellular protein catabolic process	20	133	0.697975	0.941401	A0A287NWK0;A0A8I6WKG3;A0A8I6WT04;A0A8I6XEP7;A0A8I6XJN9;A0A8I6Y0T7;A0A8I6Y2P0;A0A8I6YNI8;A0A8I7B6R2;A0MMD3;B4ESE6;F2D7S9;F2D894;F2DC74;F2DDC9;F2DHP2;F2DJW8;F2DUJ6;F2DUR4;F2E6T9
GO:0051603	proteolysis involved in cellular protein catabolic process	20	133	0.697975	0.941401	A0A287NWK0;A0A8I6WKG3;A0A8I6WT04;A0A8I6XEP7;A0A8I6XJN9;A0A8I6Y0T7;A0A8I6Y2P0;A0A8I6YNI8;A0A8I7B6R2;A0MMD3;B4ESE6;F2D7S9;F2D894;F2DC74;F2DDC9;F2DHP2;F2DJW8;F2DUJ6;F2DUR4;F2E6T9
GO:0070972	protein localization to endoplasmic reticulum	5	35	0.699567	0.941401	A0A8I7B654;F2CV17;F2CWB3;F2CWN4;F2DVC1
GO:0016053	organic acid biosynthetic process	21	140	0.705608	0.941401	A0A5C1YV39;A0A8I6WWJ7;A0A8I6XFM9;A0A8I6XPB3;A0A8I6Y4J8;A0A8I6YFL0;A0A8I6YHI9;A0A8I6YQI6;A0A8I6YWJ4;A0A8I7B4C5;A0A8I7BJR0;F2CW53;F2D643;F2DR63;F2DSZ9;F2DYM4;F2DZK7;F2E2C7;F2E3I7;F2EDT9;Q673G6
GO:0031323	regulation of cellular metabolic process	21	140	0.705608	0.941401	A0A8I6WV37;A0A8I6XCP7;A0A8I6XDB4;A0A8I6XEF6;A0A8I6XJN9;A0A8I6YIV5;A0A8I6YL06;A0A8I6Z4M3;A0A8I6Z9Z3;A0A8I7BE86;A1XXI9;F2CQ03;F2CRK1;F2D6M6;F2DC93;F2DSZ9;F2DZF2;F2E3X1;F2EHE1;F2EJZ7;M0Y7Q2
GO:0046394	carboxylic acid biosynthetic process	21	140	0.705608	0.941401	A0A5C1YV39;A0A8I6WWJ7;A0A8I6XFM9;A0A8I6XPB3;A0A8I6Y4J8;A0A8I6YFL0;A0A8I6YHI9;A0A8I6YQI6;A0A8I6YWJ4;A0A8I7B4C5;A0A8I7BJR0;F2CW53;F2D643;F2DR63;F2DSZ9;F2DYM4;F2DZK7;F2E2C7;F2E3I7;F2EDT9;Q673G6
GO:1901137	carbohydrate derivative biosynthetic process	14	95	0.708994	0.941401	A0A5C1YV39;A0A8I6WHD1;A0A8I6WKM0;A0A8I6X6B1;A0A8I6XD03;A0A8I6XH22;A0A8I6XH57;A0A8I6XRV2;A0A8I7BBH0;A0A8I7BII2;F2CWQ6;F2D119;F2DJJ2;F2EIL0
GO:0016051	carbohydrate biosynthetic process	7	49	0.711462	0.941401	A0A2P1AB13;A0A8I6XI70;A0A8I7BFU9;C3W8L3;F2CQV1;F2DEG9;F2DQH1
GO:0019318	hexose metabolic process	7	49	0.711462	0.941401	A0A287ILG2;A0A3S9KBF3;A0A8I6YK25;F2CQV1;F2CU23;F2CW03;F2DEG9
GO:0071554	cell wall organization or biogenesis	7	49	0.711462	0.941401	A0A0U2GJJ3;A0A0U2GJL1;A0A8I6WS80;A0A8I6Y180;A0A8I6YF87;F2DIP6;F2ELP4
GO:0006508	proteolysis	35	230	0.713136	0.941401	A0A287NWK0;A0A8I6WKG3;A0A8I6WT04;A0A8I6WT13;A0A8I6X7Q6;A0A8I6XEP7;A0A8I6XJN9;A0A8I6XQV5;A0A8I6XSD2;A0A8I6Y0T7;A0A8I6Y2P0;A0A8I6Y5W5;A0A8I6Y6N4;A0A8I6YNI8;A0A8I6YTI2;A0A8I6YUS4;A0A8I6YVL6;A0A8I7B2U1;A0A8I7B654;A0A8I7B6R2;A0A8I7B6V7;A0MMD3;B4ESE6;F2D7S9;F2D894;F2DC74;F2DC93;F2DDC9;F2DHP2;F2DJW8;F2DNP6;F2DTJ0;F2DUJ6;F2DUR4;F2E6T9
GO:0000463	maturation of LSU-rRNA from tricistronic rRNA transcript (SSU-rRNA, 5.8S rRNA, LSU-rRNA)	1	7	0.713533	0.941401	F2E0C0
GO:0006071	glycerol metabolic process	1	7	0.713533	0.941401	M0WQ79
GO:0006222	UMP biosynthetic process	1	7	0.713533	0.941401	A0A8I6WKM0
GO:0006448	regulation of translational elongation	1	7	0.713533	0.941401	A0A8I6XEF6
GO:0006986	response to unfolded protein	1	7	0.713533	0.941401	A0A8I6Y5Z0
GO:0007623	circadian rhythm	1	7	0.713533	0.941401	F2CPL2
GO:0008033	tRNA processing	1	7	0.713533	0.941401	A0A8I6X472
GO:0009148	pyrimidine nucleoside triphosphate biosynthetic process	1	7	0.713533	0.941401	A0A8I6WHD1
GO:0009173	pyrimidine ribonucleoside monophosphate metabolic process	1	7	0.713533	0.941401	A0A8I6WKM0
GO:0009174	pyrimidine ribonucleoside monophosphate biosynthetic process	1	7	0.713533	0.941401	A0A8I6WKM0
GO:0009664	plant-type cell wall organization	1	7	0.713533	0.941401	A0A8I6Y180
GO:0010257	NADH dehydrogenase complex assembly	1	7	0.713533	0.941401	A0A8I6ZA75
GO:0016568	chromatin modification	1	7	0.713533	0.941401	M0Y7Q2
GO:0030162	regulation of proteolysis	1	7	0.713533	0.941401	A0A8I6XJN9
GO:0032981	mitochondrial respiratory chain complex I assembly	1	7	0.713533	0.941401	A0A8I6ZA75
GO:0034620	cellular response to unfolded protein	1	7	0.713533	0.941401	A0A8I6Y5Z0
GO:0035459	cargo loading into vesicle	1	7	0.713533	0.941401	A0A8I6WMI1
GO:0035966	response to topologically incorrect protein	1	7	0.713533	0.941401	A0A8I6Y5Z0
GO:0035967	cellular response to topologically incorrect protein	1	7	0.713533	0.941401	A0A8I6Y5Z0
GO:0042430	indole-containing compound metabolic process	1	7	0.713533	0.941401	A0A8I6YTX6
GO:0046049	UMP metabolic process	1	7	0.713533	0.941401	A0A8I6WKM0
GO:0046916	cellular transition metal ion homeostasis	1	7	0.713533	0.941401	F2D2S2
GO:0048199	vesicle targeting, to, from or within Golgi	1	7	0.713533	0.941401	A0A8I6WTQ8
GO:0048511	rhythmic process	1	7	0.713533	0.941401	F2CPL2
GO:0055076	transition metal ion homeostasis	1	7	0.713533	0.941401	F2D2S2
GO:0070534	protein K63-linked ubiquitination	1	7	0.713533	0.941401	F2CQH9
GO:0072583	clathrin-mediated endocytosis	1	7	0.713533	0.941401	A0A8I6Z7P9
GO:0090110	cargo loading into COPII-coated vesicle	1	7	0.713533	0.941401	A0A8I6WMI1
GO:0090567	reproductive shoot system development	1	7	0.713533	0.941401	Q673G6
GO:0097031	mitochondrial respiratory chain complex I biogenesis	1	7	0.713533	0.941401	A0A8I6ZA75
GO:0033036	macromolecule localization	50	325	0.714812	0.941401	A0A287FZ34;A0A287LRJ1;A0A287NWK0;A0A287Q7U2;A0A8I6WF91;A0A8I6WHM6;A0A8I6WIA9;A0A8I6WIT4;A0A8I6WMI1;A0A8I6X0Z2;A0A8I6X2Y8;A0A8I6X8X0;A0A8I6XB86;A0A8I6XBH2;A0A8I6XEC2;A0A8I6XNN7;A0A8I6XZV6;A0A8I6YC75;A0A8I6YEZ5;A0A8I6YLT8;A0A8I6YXG1;A0A8I6Z7P9;A0A8I6ZAC4;A0A8I7B2K7;A0A8I7B654;F2CQY5;F2CV17;F2CV36;F2CWB3;F2CWC9;F2CWN4;F2CXT5;F2CYK2;F2D6G3;F2D8K0;F2D9V7;F2DGM5;F2DIG1;F2DKP3;F2DP42;F2DRI5;F2DVC1;F2E0U…
GO:0070887	cellular response to chemical stimulus	11	76	0.719434	0.941401	A0A8I6WHE5;A0A8I6WXW1;A0A8I6XTB9;A0A8I6Y5Z0;A0A8I6YXG5;A0A8I6Z4M3;A1XXI9;F2CQX6;F2D7S9;F2D9U3;F2DAR0
GO:0006970	response to osmotic stress	4	29	0.721682	0.941401	A0A8I6XJF2;A0A8I7B995;F2CU44;F2DXX0
GO:0009651	response to salt stress	4	29	0.721682	0.941401	A0A8I6XJF2;A0A8I7B995;F2CU44;F2DXX0
GO:0009890	negative regulation of biosynthetic process	4	29	0.721682	0.941401	A0A8I6Z9Z3;F2CQ03;F2D6M6;M0Y7Q2
GO:0031327	negative regulation of cellular biosynthetic process	4	29	0.721682	0.941401	A0A8I6Z9Z3;F2CQ03;F2D6M6;M0Y7Q2
GO:0006302	double-strand break repair	3	22	0.722457	0.941401	A0A287U5M5;A0A8I6YZG5;F2ELJ9
GO:0006873	cellular ion homeostasis	3	22	0.722457	0.941401	A0A8I6XQR9;F2CRK6;F2D2S2
GO:0030003	cellular cation homeostasis	3	22	0.722457	0.941401	A0A8I6XQR9;F2CRK6;F2D2S2
GO:0055080	cation homeostasis	3	22	0.722457	0.941401	A0A8I6XQR9;F2CRK6;F2D2S2
GO:0071229	cellular response to acid chemical	3	22	0.722457	0.941401	A1XXI9;F2D7S9;F2DAR0
GO:0098771	inorganic ion homeostasis	3	22	0.722457	0.941401	A0A8I6XQR9;F2CRK6;F2D2S2
GO:0009185	ribonucleoside diphosphate metabolic process	5	36	0.723868	0.941401	A0A8I6XBW8;A0A8I7BCM2;F2CQV1;F2CW03;F2EIL0
GO:0042743	hydrogen peroxide metabolic process	5	36	0.723868	0.941401	A0A287PY01;A0A8I6XTB9;A0A8I6YHJ3;A0A8I6YXG5;F2CPL2
GO:0042744	hydrogen peroxide catabolic process	5	36	0.723868	0.941401	A0A287PY01;A0A8I6XTB9;A0A8I6YHJ3;A0A8I6YXG5;F2CPL2
GO:0046128	purine ribonucleoside metabolic process	14	96	0.724155	0.941401	A0A5C1YV39;A0A8I6WTI3;A0A8I6XBW8;A0A8I6YH05;A0A8I7BCM2;F2CQV1;F2CT87;F2CW03;F2CWQ6;F2D7B2;F2DJJ2;F2DMM2;F2E2B0;F2EL27
GO:1901605	alpha-amino acid metabolic process	20	135	0.724156	0.941401	A0A8I6WWJ7;A0A8I6X6B1;A0A8I6XFM9;A0A8I6XPB3;A0A8I6XQX4;A0A8I6Y4J8;A0A8I6YFL0;A0A8I6YHI9;A0A8I6YTX6;A0A8I6YWJ4;A0A8I7B4C5;A0A8I7BJR0;F2CW53;F2D643;F2DDV8;F2DYM4;F2DZ70;F2E0P9;F2E2C7;F2E3I7
GO:0048519	negative regulation of biological process	10	70	0.729919	0.941401	A0A8I6WDS1;A0A8I6WV37;A0A8I6XJN9;A0A8I6YL06;A0A8I6Z9Z3;F2CQ03;F2D6M6;F2DZF2;F2EHE1;M0Y7Q2
GO:0000724	double-strand break repair via homologous recombination	2	15	0.730238	0.941401	A0A287U5M5;A0A8I6YZG5
GO:0000725	recombinational repair	2	15	0.730238	0.941401	A0A287U5M5;A0A8I6YZG5
GO:0006730	one-carbon metabolic process	2	15	0.730238	0.941401	A0A8I6XQX4;A0A8I6YWJ4
GO:0006778	porphyrin-containing compound metabolic process	2	15	0.730238	0.941401	F2CVB4;F2DC91
GO:0033013	tetrapyrrole metabolic process	2	15	0.730238	0.941401	F2CVB4;F2DC91
GO:0046112	nucleobase biosynthetic process	2	15	0.730238	0.941401	A0A8I6WKM0;F2EIL0
GO:0051173	positive regulation of nitrogen compound metabolic process	2	15	0.730238	0.941401	A0A8I6XEF6;A1XXI9
GO:0042221	response to chemical	28	187	0.730366	0.941401	A0A8I6WGX0;A0A8I6WHE5;A0A8I6WWC5;A0A8I6WXW1;A0A8I6XJF2;A0A8I6XTB9;A0A8I6XWW8;A0A8I6Y5Z0;A0A8I6YXG5;A0A8I6Z4M3;A0A8I7B995;A1XXI9;F2CPL2;F2CQX6;F2CU44;F2CVB4;F2D7S9;F2D9U3;F2DAR0;F2DGM5;F2DSZ9;F2DXX0;F2E0P9;F2E4I7;F2EF30;Q38JE4;Q43488;T1TD43
GO:0003006	developmental process involved in reproduction	7	50	0.731866	0.941401	A0A8I6WQV8;A0A8I6WXG8;A0A8I6XBD2;F2DZK3;F2EKQ3;M0XNG3;Q673G6
GO:0009116	nucleoside metabolic process	16	110	0.737254	0.941401	A0A5C1YV39;A0A8I6WKM0;A0A8I6WTI3;A0A8I6XBW8;A0A8I6YH05;A0A8I7BCM2;F2CQV1;F2CT87;F2CW03;F2CWQ6;F2D7B2;F2DJJ2;F2DMM2;F2E2B0;F2EIL0;F2EL27
GO:0006520	cellular amino acid metabolic process	28	188	0.741098	0.941401	A0A8I6WQV8;A0A8I6WWJ7;A0A8I6X6B1;A0A8I6XFM9;A0A8I6XPB3;A0A8I6XQX4;A0A8I6Y4J8;A0A8I6YFL0;A0A8I6YHI9;A0A8I6YQI6;A0A8I6YTX6;A0A8I6YWJ4;A0A8I6Z0L1;A0A8I7B4C5;A0A8I7BJR0;F2CW53;F2D643;F2DDV8;F2DYM4;F2DZ70;F2E0P9;F2E2C7;F2E3I7;F2E5S3;F2E941;F2EDT9;F2EFV3;M0XNG3
GO:0009987	cellular process	322	1999	0.743217	0.941401	A0A0U2GJJ3;A0A0U2GJL1;A0A287EZS0;A0A287EZV5;A0A287FP91;A0A287FZ34;A0A287NWK0;A0A287PY01;A0A287Q7U2;A0A287TWK6;A0A287U5M5;A0A2P1AB13;A0A3S9KBF3;A0A5C1YV39;A0A8I6WB19;A0A8I6WB26;A0A8I6WDS1;A0A8I6WF91;A0A8I6WFJ6;A0A8I6WGG3;A0A8I6WHD1;A0A8I6WHE5;A0A8I6WIA9;A0A8I6WKG3;A0A8I6WKM0;A0A8I6WMI1;A0A8I6WMP9;A0A8I6WNS5;A0A8I6WQV8;A0A8I6WR25;A0A8I6WS80;A0A8I6WT04;A0A8I6WT14;A0A8I6WTI3;A0A8I6WTQ8;A0A8I6WV37;A0A…
GO:0009066	aspartate family amino acid metabolic process	5	37	0.746731	0.941401	A0A8I6WWJ7;A0A8I6XPB3;A0A8I6YWJ4;F2D643;F2E2C7
GO:0009163	nucleoside biosynthetic process	5	37	0.746731	0.941401	A0A5C1YV39;A0A8I6WKM0;F2CWQ6;F2DJJ2;F2EIL0
GO:0042455	ribonucleoside biosynthetic process	5	37	0.746731	0.941401	A0A5C1YV39;A0A8I6WKM0;F2CWQ6;F2DJJ2;F2EIL0
GO:0072330	monocarboxylic acid biosynthetic process	5	37	0.746731	0.941401	A0A5C1YV39;A0A8I6YQI6;F2DR63;F2DSZ9;F2EDT9
GO:1903047	mitotic cell cycle process	4	30	0.746976	0.941401	A0A8I6WDS1;A0A8I6XJN9;F2D4P0;F2DNW4
GO:0006081	cellular aldehyde metabolic process	6	44	0.748441	0.941401	A0A3S9KBF3;A0A8I6X6J9;A0A8I6XFM0;A0A8I6XQ26;F2CUF4;F2D005
GO:0071702	organic substance transport	47	310	0.748842	0.941401	A0A287FZ34;A0A287LRJ1;A0A287NWK0;A0A287Q7U2;A0A8I6WF91;A0A8I6WHM6;A0A8I6WIA9;A0A8I6WIT4;A0A8I6WMI1;A0A8I6X0Z2;A0A8I6X2Y8;A0A8I6X8X0;A0A8I6XB86;A0A8I6XBH2;A0A8I6XEC2;A0A8I6XNN7;A0A8I6XZV6;A0A8I6YC75;A0A8I6YEZ5;A0A8I6YLT8;A0A8I6Z7P9;A0A8I6ZAC4;A0A8I7B2K7;A0A8I7B3D9;A0A8I7B654;F2CV17;F2CV36;F2CWC9;F2CWN4;F2CXT5;F2D6G3;F2D8K0;F2D9V7;F2DG80;F2DGM5;F2DIG1;F2DKP3;F2DP42;F2DRI5;F2DVC1;F2E0U3;F2E298;F2E3M…
GO:0010154	fruit development	3	23	0.750973	0.941401	A0A8I6WXG8;F2DZK3;F2EKQ3
GO:0017148	negative regulation of translation	3	23	0.750973	0.941401	A0A8I6Z9Z3;F2CQ03;F2D6M6
GO:0034249	negative regulation of cellular amide metabolic process	3	23	0.750973	0.941401	A0A8I6Z9Z3;F2CQ03;F2D6M6
GO:0042440	pigment metabolic process	3	23	0.750973	0.941401	D7USP2;F2DC91;F2DSZ9
GO:0044801	single-organism membrane fusion	3	23	0.750973	0.941401	A0A8I6X8X0;F2DRI5;F2E298
GO:0048284	organelle fusion	3	23	0.750973	0.941401	A0A8I6X8X0;F2DRI5;F2E298
GO:0048316	seed development	3	23	0.750973	0.941401	A0A8I6WXG8;F2DZK3;F2EKQ3
GO:0090174	organelle membrane fusion	3	23	0.750973	0.941401	A0A8I6X8X0;F2DRI5;F2E298
GO:0006355	regulation of transcription, DNA-templated	7	51	0.751253	0.941401	A0A8I6XCP7;A0A8I6XDB4;A0A8I6Z4M3;A1XXI9;F2EHE1;F2EJZ7;M0Y7Q2
GO:1903506	regulation of nucleic acid-templated transcription	7	51	0.751253	0.941401	A0A8I6XCP7;A0A8I6XDB4;A0A8I6Z4M3;A1XXI9;F2EHE1;F2EJZ7;M0Y7Q2
GO:2001141	regulation of RNA biosynthetic process	7	51	0.751253	0.941401	A0A8I6XCP7;A0A8I6XDB4;A0A8I6Z4M3;A1XXI9;F2EHE1;F2EJZ7;M0Y7Q2
GO:0042278	purine nucleoside metabolic process	14	98	0.752963	0.941401	A0A5C1YV39;A0A8I6WTI3;A0A8I6XBW8;A0A8I6YH05;A0A8I7BCM2;F2CQV1;F2CT87;F2CW03;F2CWQ6;F2D7B2;F2DJJ2;F2DMM2;F2E2B0;F2EL27
GO:0051246	regulation of protein metabolic process	8	58	0.754715	0.941401	A0A8I6XEF6;A0A8I6XJN9;A0A8I6YIV5;A0A8I6Z9Z3;A0A8I7BE86;F2CQ03;F2D6M6;F2DZF2
GO:0019222	regulation of metabolic process	25	170	0.755355	0.941401	A0A8I6WV37;A0A8I6XCP7;A0A8I6XDB4;A0A8I6XEF6;A0A8I6XJN9;A0A8I6YIV5;A0A8I6YL06;A0A8I6Z4M3;A0A8I6Z9Z3;A0A8I7BE86;A1XXI9;F2CQ03;F2CRK1;F2CXL5;F2D3D5;F2D6M6;F2DC93;F2DLR6;F2DSZ9;F2DZF2;F2E3M7;F2E3X1;F2EHE1;F2EJZ7;M0Y7Q2
GO:0000028	ribosomal small subunit assembly	1	8	0.760458	0.941401	F2DFA6
GO:0000105	histidine biosynthetic process	1	8	0.760458	0.941401	A0A8I6XFM9
GO:0000281	mitotic cytokinesis	1	8	0.760458	0.941401	F2D4P0
GO:0000910	cytokinesis	1	8	0.760458	0.941401	F2D4P0
GO:0006547	histidine metabolic process	1	8	0.760458	0.941401	A0A8I6XFM9
GO:0006551	leucine metabolic process	1	8	0.760458	0.941401	A0A8I7B4C5
GO:0006558	L-phenylalanine metabolic process	1	8	0.760458	0.941401	A0A8I6YHI9
GO:0009065	glutamine family amino acid catabolic process	1	8	0.760458	0.941401	F2E0P9
GO:0015936	coenzyme A metabolic process	1	8	0.760458	0.941401	A0A5C1YV39
GO:0015937	coenzyme A biosynthetic process	1	8	0.760458	0.941401	A0A5C1YV39
GO:0019400	alditol metabolic process	1	8	0.760458	0.941401	M0WQ79
GO:0030001	metal ion transport	1	8	0.760458	0.941401	F2CWF3
GO:0032386	regulation of intracellular transport	1	8	0.760458	0.941401	F2E3M7
GO:0032507	maintenance of protein location in cell	1	8	0.760458	0.941401	F2CWB3
GO:0033865	nucleoside bisphosphate metabolic process	1	8	0.760458	0.941401	A0A5C1YV39
GO:0033866	nucleoside bisphosphate biosynthetic process	1	8	0.760458	0.941401	A0A5C1YV39
GO:0033875	ribonucleoside bisphosphate metabolic process	1	8	0.760458	0.941401	A0A5C1YV39
GO:0034030	ribonucleoside bisphosphate biosynthetic process	1	8	0.760458	0.941401	A0A5C1YV39
GO:0034032	purine nucleoside bisphosphate metabolic process	1	8	0.760458	0.941401	A0A5C1YV39
GO:0034033	purine nucleoside bisphosphate biosynthetic process	1	8	0.760458	0.941401	A0A5C1YV39
GO:0043649	dicarboxylic acid catabolic process	1	8	0.760458	0.941401	F2E0P9
GO:0045185	maintenance of protein location	1	8	0.760458	0.941401	F2CWB3
GO:0045491	xylan metabolic process	1	8	0.760458	0.941401	A0A8I6YF87
GO:0045893	positive regulation of transcription, DNA-templated	1	8	0.760458	0.941401	A1XXI9
GO:0046474	glycerophospholipid biosynthetic process	1	8	0.760458	0.941401	F2CPX3
GO:0052803	imidazole-containing compound metabolic process	1	8	0.760458	0.941401	A0A8I6XFM9
GO:0060560	developmental growth involved in morphogenesis	1	8	0.760458	0.941401	Q673G6
GO:0061640	cytoskeleton-dependent cytokinesis	1	8	0.760458	0.941401	F2D4P0
GO:0090305	nucleic acid phosphodiester bond hydrolysis	1	8	0.760458	0.941401	F2CS23
GO:1902221	erythrose 4-phosphate/phosphoenolpyruvate family amino acid metabolic process	1	8	0.760458	0.941401	A0A8I6YHI9
GO:1902531	regulation of intracellular signal transduction	1	8	0.760458	0.941401	A0A8I7B2K7
GO:1902680	positive regulation of RNA biosynthetic process	1	8	0.760458	0.941401	A1XXI9
GO:1903508	positive regulation of nucleic acid-templated transcription	1	8	0.760458	0.941401	A1XXI9
GO:0009251	glucan catabolic process	2	16	0.763259	0.943013	A0A8I7BFU9;Q42835
GO:0097306	cellular response to alcohol	2	16	0.763259	0.943013	A1XXI9;F2DAR0
GO:0044282	small molecule catabolic process	16	112	0.763629	0.943013	A0A287ILG2;A0A8I6X6J9;A0A8I6XCQ2;A0A8I6XQ26;A0A8I6XRG5;A0A8I6XUQ8;A0A8I6YK25;A0A8I6YTX6;A0A8I6Z0L1;F2D005;F2D1C6;F2DDV8;F2DHZ5;F2DSA8;F2DZ70;F2E0P9
GO:1902582	single-organism intracellular transport	39	261	0.765247	0.943276	A0A287NWK0;A0A8I6WF91;A0A8I6WHM6;A0A8I6WIA9;A0A8I6WIT4;A0A8I6WMI1;A0A8I6WTQ8;A0A8I6X2Y8;A0A8I6XBH2;A0A8I6XEC2;A0A8I6XLR3;A0A8I6XNN7;A0A8I6Y690;A0A8I6YC75;A0A8I6YLT8;A0A8I6ZAC4;A0A8I7B3D9;A0A8I7B654;F2CRN1;F2CT83;F2CV17;F2CWB3;F2CWN4;F2CXT5;F2D2Z9;F2D5K0;F2D6G3;F2D8K0;F2DA66;F2DGM5;F2DIG1;F2DJJ2;F2DP42;F2DVC1;F2DVS7;F2E298;F2E3M7;F2E405;F2E4I7
GO:0006457	protein folding	14	99	0.766598	0.943276	A0A8I6WMP9;A0A8I6WR25;A0A8I6XBL4;A0A8I6XIU6;A0A8I6XJF2;A0A8I6XX88;A0A8I6Y4H4;A0A8I6YD95;A0A8I7B995;F2CTS4;F2CU44;F2CXT5;F2DB07;F2DGG1
GO:0090407	organophosphate biosynthetic process	11	79	0.766856	0.943276	A0A5C1YV39;A0A8I6WHD1;A0A8I6WKM0;A0A8I6X6B1;A0A8I6XD03;A0A8I7BBH0;F2CPX3;F2CWQ6;F2D119;F2DJJ2;F2EIL0
GO:0016042	lipid catabolic process	5	38	0.768167	0.943276	A0A8I6XCQ2;A0A8I6XRG5;A0A8I6XUQ8;F2D1C6;F2DHZ5
GO:0034637	cellular carbohydrate biosynthetic process	5	38	0.768167	0.943276	A0A2P1AB13;A0A8I6XI70;A0A8I7BFU9;C3W8L3;F2DQH1
GO:0048608	reproductive structure development	6	45	0.768203	0.943276	A0A8I6WQV8;A0A8I6WXG8;F2DZK3;F2EKQ3;M0XNG3;Q673G6
GO:0061458	reproductive system development	6	45	0.768203	0.943276	A0A8I6WQV8;A0A8I6WXG8;F2DZK3;F2EKQ3;M0XNG3;Q673G6
GO:0044724	single-organism carbohydrate catabolic process	8	59	0.771909	0.946702	A0A287ILG2;A0A8I6XBW8;A0A8I6XUU4;A0A8I6YF87;A0A8I6YK25;A0A8I7BCM2;F2CQV1;F2CW03
GO:0030163	protein catabolic process	20	139	0.772244	0.946702	A0A287NWK0;A0A8I6WKG3;A0A8I6WT04;A0A8I6XEP7;A0A8I6XJN9;A0A8I6Y0T7;A0A8I6Y2P0;A0A8I6YNI8;A0A8I7B6R2;A0MMD3;B4ESE6;F2D7S9;F2D894;F2DC74;F2DDC9;F2DHP2;F2DJW8;F2DUJ6;F2DUR4;F2E6T9
GO:0000271	polysaccharide biosynthetic process	3	24	0.777094	0.95034	A0A2P1AB13;A0A8I7BFU9;C3W8L3
GO:0009698	phenylpropanoid metabolic process	3	24	0.777094	0.95034	F2CPM4;F2E7V8;W8E7E3
GO:0033692	cellular polysaccharide biosynthetic process	3	24	0.777094	0.95034	A0A2P1AB13;A0A8I7BFU9;C3W8L3
GO:0016054	organic acid catabolic process	11	80	0.781363	0.953357	A0A8I6XCQ2;A0A8I6XRG5;A0A8I6XUQ8;A0A8I6YTX6;A0A8I6Z0L1;F2D1C6;F2DDV8;F2DHZ5;F2DSA8;F2DZ70;F2E0P9
GO:0046395	carboxylic acid catabolic process	11	80	0.781363	0.953357	A0A8I6XCQ2;A0A8I6XRG5;A0A8I6XUQ8;A0A8I6YTX6;A0A8I6Z0L1;F2D1C6;F2DDV8;F2DHZ5;F2DSA8;F2DZ70;F2E0P9
GO:0044723	single-organism carbohydrate metabolic process	24	166	0.78145	0.953357	A0A287ILG2;A0A2P1AB13;A0A3S9KBF3;A0A8I6XBW8;A0A8I6XFM0;A0A8I6XH22;A0A8I6XH57;A0A8I6XI70;A0A8I6XRV2;A0A8I6XUU4;A0A8I6Y7K8;A0A8I6YF87;A0A8I6YK25;A0A8I7BCM2;A0A8I7BFU9;A0A8I7BII2;C3W8L3;F2CQV1;F2CU23;F2CW03;F2DEG9;F2DQH1;M0WQ79;Q4A1H2
GO:0044238	primary metabolic process	228	1437	0.782121	0.953407	A0A0U2GJJ3;A0A0U2GJL1;A0A287EZS0;A0A287ILG2;A0A287NWK0;A0A287U5M5;A0A2P1AB13;A0A3S9KBF3;A0A5C1YV39;A0A8I6W6F0;A0A8I6WB19;A0A8I6WD99;A0A8I6WDS1;A0A8I6WFJ6;A0A8I6WGG3;A0A8I6WH69;A0A8I6WHD1;A0A8I6WKG3;A0A8I6WKM0;A0A8I6WQV8;A0A8I6WS80;A0A8I6WT04;A0A8I6WT13;A0A8I6WTI3;A0A8I6WV37;A0A8I6WVW5;A0A8I6WWJ7;A0A8I6WXY7;A0A8I6X0M9;A0A8I6X472;A0A8I6X6B1;A0A8I6X6P0;A0A8I6X7M2;A0A8I6X7P5;A0A8I6X7Q6;A0A8I6XBW8;A0A…
GO:0000278	mitotic cell cycle	6	46	0.786791	0.955964	A0A8I6WDS1;A0A8I6XJN9;A0A8I6Y3M9;F2D4P0;F2D8Z5;F2DNW4
GO:0043648	dicarboxylic acid metabolic process	6	46	0.786791	0.955964	A0A8I6WWJ7;A0A8I6XPB3;F2D643;F2DYM4;F2E0P9;F2ELT5
GO:0048518	positive regulation of biological process	6	46	0.786791	0.955964	A0A8I6XEF6;A0A8I6YIV5;A1XXI9;F2CQY5;F2E3M7;M0XN08
GO:1901659	glycosyl compound biosynthetic process	5	39	0.7882	0.955964	A0A5C1YV39;A0A8I6WKM0;F2CWQ6;F2DJJ2;F2EIL0
GO:0044802	single-organism membrane organization	14	101	0.792318	0.955964	A0A8I6WMI1;A0A8I6WTQ8;A0A8I6WWA9;A0A8I6X8X0;A0A8I6ZAC4;A0A8I7B6R2;F2CV17;F2CWN4;F2CYK2;F2DRI5;F2DVS7;F2E298;F2E3J0;M0XN08
GO:0006721	terpenoid metabolic process	2	17	0.792718	0.955964	F2DZK7;Q673G6
GO:0016485	protein processing	2	17	0.792718	0.955964	A0A8I6YVL6;A0A8I7B654
GO:0030029	actin filament-based process	2	17	0.792718	0.955964	A0A8I6XEP9;A0A8I6YKQ7
GO:0033108	mitochondrial respiratory chain complex assembly	2	17	0.792718	0.955964	A0A8I6ZA75;F2DK52
GO:0035384	thioester biosynthetic process	2	17	0.792718	0.955964	A0A5C1YV39;A0A8I6YFN2
GO:0071396	cellular response to lipid	2	17	0.792718	0.955964	A1XXI9;F2DAR0
GO:0071616	acyl-CoA biosynthetic process	2	17	0.792718	0.955964	A0A5C1YV39;A0A8I6YFN2
GO:0019752	carboxylic acid metabolic process	56	373	0.793642	0.955964	A0A5C1YV39;A0A8I6WGG3;A0A8I6WQV8;A0A8I6WT14;A0A8I6WTI3;A0A8I6WWJ7;A0A8I6X6B1;A0A8I6XBW8;A0A8I6XCQ2;A0A8I6XFM0;A0A8I6XFM9;A0A8I6XPB3;A0A8I6XQ26;A0A8I6XQX4;A0A8I6XRG5;A0A8I6XUQ8;A0A8I6Y4J8;A0A8I6YFL0;A0A8I6YFN2;A0A8I6YHI9;A0A8I6YQI6;A0A8I6YTX6;A0A8I6YWJ4;A0A8I6Z0L1;A0A8I7B4C5;A0A8I7BCM2;A0A8I7BJR0;F2CQV1;F2CT87;F2CW03;F2CW53;F2D1C6;F2D643;F2DDV8;F2DHZ5;F2DR63;F2DS63;F2DSA8;F2DSZ9;F2DUI2;F2DYM4;F2DZ…
GO:0006796	phosphate-containing compound metabolic process	38	258	0.793884	0.955964	A0A287FP91;A0A3S9KBF3;A0A5C1YV39;A0A8I6WHD1;A0A8I6WKM0;A0A8I6WTI3;A0A8I6WXW1;A0A8I6X017;A0A8I6X6B1;A0A8I6XBW8;A0A8I6XD03;A0A8I6YH05;A0A8I6YIV5;A0A8I6YMC3;A0A8I6Z0S4;A0A8I7B1F6;A0A8I7BBH0;A0A8I7BCM2;F2CPX3;F2CQV1;F2CT87;F2CW03;F2CWQ6;F2D119;F2D480;F2D7B2;F2DJJ2;F2DMM2;F2DS97;F2DSU7;F2DZF2;F2DZN2;F2E2B0;F2E2C7;F2E8P3;F2EIL0;F2EL27;M0XGU8
GO:0019941	modification-dependent protein catabolic process	15	108	0.796052	0.955964	A0A287NWK0;A0A8I6WKG3;A0A8I6XEP7;A0A8I6XJN9;A0A8I6Y0T7;A0A8I6Y2P0;A0A8I6YNI8;A0A8I7B6R2;A0MMD3;F2D7S9;F2D894;F2DC74;F2DHP2;F2DJW8;F2DUJ6
GO:0006415	translational termination	1	9	0.799712	0.955964	A0A8I6XEF6
GO:0006526	arginine biosynthetic process	1	9	0.799712	0.955964	F2CW53
GO:0006901	vesicle coating	1	9	0.799712	0.955964	A0A8I6WTQ8
GO:0042168	heme metabolic process	1	9	0.799712	0.955964	F2DC91
GO:0045017	glycerolipid biosynthetic process	1	9	0.799712	0.955964	F2CPX3
GO:0048468	cell development	1	9	0.799712	0.955964	F2E3M7
GO:0072507	divalent inorganic cation homeostasis	1	9	0.799712	0.955964	F2D2S2
GO:0080135	regulation of cellular response to stress	1	9	0.799712	0.955964	F2CPL2
GO:0034613	cellular protein localization	32	220	0.800004	0.955964	A0A287NWK0;A0A287Q7U2;A0A8I6WF91;A0A8I6WHM6;A0A8I6WIA9;A0A8I6WIT4;A0A8I6WMI1;A0A8I6X2Y8;A0A8I6X8X0;A0A8I6XBH2;A0A8I6XEC2;A0A8I6XNN7;A0A8I6XZV6;A0A8I6YC75;A0A8I6YXG1;A0A8I6Z7P9;A0A8I6ZAC4;A0A8I7B654;F2CV17;F2CWB3;F2CWN4;F2CXT5;F2CYK2;F2DIG1;F2DKP3;F2DRI5;F2DVC1;F2E0U3;F2E298;F2E3M7;F2E405;M0XN08
GO:0070727	cellular macromolecule localization	32	220	0.800004	0.955964	A0A287NWK0;A0A287Q7U2;A0A8I6WF91;A0A8I6WHM6;A0A8I6WIA9;A0A8I6WIT4;A0A8I6WMI1;A0A8I6X2Y8;A0A8I6X8X0;A0A8I6XBH2;A0A8I6XEC2;A0A8I6XNN7;A0A8I6XZV6;A0A8I6YC75;A0A8I6YXG1;A0A8I6Z7P9;A0A8I6ZAC4;A0A8I7B654;F2CV17;F2CWB3;F2CWN4;F2CXT5;F2CYK2;F2DIG1;F2DKP3;F2DRI5;F2DVC1;F2E0U3;F2E298;F2E3M7;F2E405;M0XN08
GO:0090304	nucleic acid metabolic process	50	336	0.802167	0.957792	A0A287EZS0;A0A287U5M5;A0A8I6WDS1;A0A8I6WFJ6;A0A8I6WQV8;A0A8I6WV37;A0A8I6X472;A0A8I6XCP7;A0A8I6XD40;A0A8I6XDB4;A0A8I6XEM6;A0A8I6XEW3;A0A8I6XF02;A0A8I6XQQ9;A0A8I6Y6M4;A0A8I6YF06;A0A8I6YL06;A0A8I6YS17;A0A8I6YSL3;A0A8I6YZG5;A0A8I6Z4M3;A0A8I7B3E6;A0A8I7BEI9;A1XXI9;F2CQH9;F2CQY5;F2CRA3;F2CS23;F2D0W0;F2D205;F2D483;F2D6G3;F2DDD5;F2DE93;F2DNW4;F2DP88;F2DUE6;F2DUJ6;F2E0C0;F2E556;F2E5S3;F2E941;F2ECG8;F2EFV3…
GO:0006631	fatty acid metabolic process	8	61	0.803651	0.958195	A0A5C1YV39;A0A8I6XCQ2;A0A8I6XRG5;A0A8I6XUQ8;F2D1C6;F2DHZ5;F2DSZ9;M0YR50
GO:0071310	cellular response to organic substance	6	47	0.804227	0.958195	A0A8I6WXW1;A0A8I6Y5Z0;A0A8I6Z4M3;A1XXI9;F2D7S9;F2DAR0
GO:0006511	ubiquitin-dependent protein catabolic process	14	102	0.804403	0.958195	A0A287NWK0;A0A8I6WKG3;A0A8I6XEP7;A0A8I6XJN9;A0A8I6Y0T7;A0A8I6Y2P0;A0A8I7B6R2;A0MMD3;F2D7S9;F2D894;F2DC74;F2DHP2;F2DJW8;F2DUJ6
GO:0055086	nucleobase-containing small molecule metabolic process	23	162	0.806564	0.95857	A0A3S9KBF3;A0A5C1YV39;A0A8I6WHD1;A0A8I6WKM0;A0A8I6WTI3;A0A8I6X6B1;A0A8I6XBW8;A0A8I6XD03;A0A8I6YH05;A0A8I7BBH0;A0A8I7BCM2;F2CQV1;F2CT87;F2CW03;F2CWQ6;F2D119;F2D7B2;F2DJJ2;F2DMM2;F2DSU7;F2E2B0;F2EIL0;F2EL27
GO:0043436	oxoacid metabolic process	56	375	0.807224	0.95857	A0A5C1YV39;A0A8I6WGG3;A0A8I6WQV8;A0A8I6WT14;A0A8I6WTI3;A0A8I6WWJ7;A0A8I6X6B1;A0A8I6XBW8;A0A8I6XCQ2;A0A8I6XFM0;A0A8I6XFM9;A0A8I6XPB3;A0A8I6XQ26;A0A8I6XQX4;A0A8I6XRG5;A0A8I6XUQ8;A0A8I6Y4J8;A0A8I6YFL0;A0A8I6YFN2;A0A8I6YHI9;A0A8I6YQI6;A0A8I6YTX6;A0A8I6YWJ4;A0A8I6Z0L1;A0A8I7B4C5;A0A8I7BCM2;A0A8I7BJR0;F2CQV1;F2CT87;F2CW03;F2CW53;F2D1C6;F2D643;F2DDV8;F2DHZ5;F2DR63;F2DS63;F2DSA8;F2DSZ9;F2DUI2;F2DYM4;F2DZ…
GO:0043632	modification-dependent macromolecule catabolic process	15	109	0.807646	0.95857	A0A287NWK0;A0A8I6WKG3;A0A8I6XEP7;A0A8I6XJN9;A0A8I6Y0T7;A0A8I6Y2P0;A0A8I6YNI8;A0A8I7B6R2;A0MMD3;F2D7S9;F2D894;F2DC74;F2DHP2;F2DJW8;F2DUJ6
GO:1901657	glycosyl compound metabolic process	16	116	0.810926	0.95857	A0A5C1YV39;A0A8I6WKM0;A0A8I6WTI3;A0A8I6XBW8;A0A8I6YH05;A0A8I7BCM2;F2CQV1;F2CT87;F2CW03;F2CWQ6;F2D7B2;F2DJJ2;F2DMM2;F2E2B0;F2EIL0;F2EL27
GO:0006096	glycolytic process	4	33	0.812315	0.95857	A0A8I6XBW8;A0A8I7BCM2;F2CQV1;F2CW03
GO:0006165	nucleoside diphosphate phosphorylation	4	33	0.812315	0.95857	A0A8I6XBW8;A0A8I7BCM2;F2CQV1;F2CW03
GO:0006757	ATP generation from ADP	4	33	0.812315	0.95857	A0A8I6XBW8;A0A8I7BCM2;F2CQV1;F2CW03
GO:0009135	purine nucleoside diphosphate metabolic process	4	33	0.812315	0.95857	A0A8I6XBW8;A0A8I7BCM2;F2CQV1;F2CW03
GO:0009179	purine ribonucleoside diphosphate metabolic process	4	33	0.812315	0.95857	A0A8I6XBW8;A0A8I7BCM2;F2CQV1;F2CW03
GO:0022402	cell cycle process	4	33	0.812315	0.95857	A0A8I6WDS1;A0A8I6XJN9;F2D4P0;F2DNW4
GO:0046031	ADP metabolic process	4	33	0.812315	0.95857	A0A8I6XBW8;A0A8I7BCM2;F2CQV1;F2CW03
GO:0046939	nucleotide phosphorylation	4	33	0.812315	0.95857	A0A8I6XBW8;A0A8I7BCM2;F2CQV1;F2CW03
GO:0006914	autophagy	2	18	0.818896	0.965584	A0A8I7B6R2;F2DC93
GO:0006090	pyruvate metabolic process	6	48	0.820538	0.966135	A0A8I6XBW8;A0A8I6YFN2;A0A8I7BCM2;F2CQV1;F2CW03;F2ELT5
GO:0016482	cytoplasmic transport	31	216	0.820641	0.966135	A0A287NWK0;A0A8I6WF91;A0A8I6WHM6;A0A8I6WIA9;A0A8I6WIT4;A0A8I6WMI1;A0A8I6X2Y8;A0A8I6XBH2;A0A8I6XEC2;A0A8I6XNN7;A0A8I6YC75;A0A8I6YEZ5;A0A8I6YLT8;A0A8I6ZAC4;A0A8I7B654;F2CT83;F2CV17;F2CWN4;F2CXT5;F2D2Z9;F2D6G3;F2D8K0;F2DA66;F2DIG1;F2DP42;F2DVC1;F2E298;F2E3M7;F2E405;F2E4I7;M0WNW4
GO:0006417	regulation of translation	5	41	0.824201	0.968047	A0A8I6XEF6;A0A8I6Z9Z3;A0A8I7BE86;F2CQ03;F2D6M6
GO:0009064	glutamine family amino acid metabolic process	5	41	0.824201	0.968047	A0A8I6X6B1;A0A8I6Y4J8;F2CW53;F2E0P9;F2E3I7
GO:0034248	regulation of cellular amide metabolic process	5	41	0.824201	0.968047	A0A8I6XEF6;A0A8I6Z9Z3;A0A8I7BE86;F2CQ03;F2D6M6
GO:0031326	regulation of cellular biosynthetic process	13	97	0.824822	0.968047	A0A8I6XCP7;A0A8I6XDB4;A0A8I6XEF6;A0A8I6Z4M3;A0A8I6Z9Z3;A0A8I7BE86;A1XXI9;F2CQ03;F2D6M6;F2DSZ9;F2EHE1;F2EJZ7;M0Y7Q2
GO:0008152	metabolic process	279	1755	0.826421	0.968107	A0A0U2GJJ3;A0A0U2GJL1;A0A287EZS0;A0A287FP91;A0A287ILG2;A0A287NWK0;A0A287PY01;A0A287SCX5;A0A287U5M5;A0A2P1AB13;A0A3S9KBF3;A0A5C1YV39;A0A8I6W6F0;A0A8I6WB19;A0A8I6WB26;A0A8I6WD99;A0A8I6WDS1;A0A8I6WFJ6;A0A8I6WGG3;A0A8I6WH69;A0A8I6WHD1;A0A8I6WKG3;A0A8I6WKM0;A0A8I6WNS5;A0A8I6WQV8;A0A8I6WS80;A0A8I6WT04;A0A8I6WT13;A0A8I6WT14;A0A8I6WTI3;A0A8I6WV37;A0A8I6WVW5;A0A8I6WWJ7;A0A8I6WXW1;A0A8I6WXY7;A0A8I6X017;A0A…
GO:0006082	organic acid metabolic process	56	378	0.82647	0.968107	A0A5C1YV39;A0A8I6WGG3;A0A8I6WQV8;A0A8I6WT14;A0A8I6WTI3;A0A8I6WWJ7;A0A8I6X6B1;A0A8I6XBW8;A0A8I6XCQ2;A0A8I6XFM0;A0A8I6XFM9;A0A8I6XPB3;A0A8I6XQ26;A0A8I6XQX4;A0A8I6XRG5;A0A8I6XUQ8;A0A8I6Y4J8;A0A8I6YFL0;A0A8I6YFN2;A0A8I6YHI9;A0A8I6YQI6;A0A8I6YTX6;A0A8I6YWJ4;A0A8I6Z0L1;A0A8I7B4C5;A0A8I7BCM2;A0A8I7BJR0;F2CQV1;F2CT87;F2CW03;F2CW53;F2D1C6;F2D643;F2DDV8;F2DHZ5;F2DR63;F2DS63;F2DSA8;F2DSZ9;F2DUI2;F2DYM4;F2DZ…
GO:0006605	protein targeting	15	111	0.8294	0.968107	A0A287NWK0;A0A8I6WF91;A0A8I6WHM6;A0A8I6WIA9;A0A8I6XBH2;A0A8I6XNN7;A0A8I6ZAC4;A0A8I7B654;F2CV17;F2CWN4;F2CXT5;F2DIG1;F2DVC1;F2E3M7;F2E405
GO:0005983	starch catabolic process	1	10	0.832546	0.968107	A0A8I7BFU9
GO:0006620	posttranslational protein targeting to membrane	1	10	0.832546	0.968107	F2CV17
GO:0007166	cell surface receptor signaling pathway	1	10	0.832546	0.968107	F2CRG7
GO:0010383	cell wall polysaccharide metabolic process	1	10	0.832546	0.968107	A0A8I6YF87
GO:0010410	hemicellulose metabolic process	1	10	0.832546	0.968107	A0A8I6YF87
GO:0015994	chlorophyll metabolic process	1	10	0.832546	0.968107	F2CVB4
GO:0042176	regulation of protein catabolic process	1	10	0.832546	0.968107	A0A8I6XJN9
GO:0043328	protein targeting to vacuole involved in ubiquitin-dependent protein catabolic process via the multivesicular body sorting pathway	1	10	0.832546	0.968107	A0A287NWK0
GO:0051254	positive regulation of RNA metabolic process	1	10	0.832546	0.968107	A1XXI9
GO:1901564	organonitrogen compound metabolic process	92	608	0.83694	0.972469	A0A3S9KBF3;A0A5C1YV39;A0A8I6WB19;A0A8I6WHD1;A0A8I6WKM0;A0A8I6WQV8;A0A8I6WT04;A0A8I6WTI3;A0A8I6WWJ7;A0A8I6X6B1;A0A8I6XBW8;A0A8I6XD03;A0A8I6XEF6;A0A8I6XFM9;A0A8I6XPB3;A0A8I6XQX4;A0A8I6XUG0;A0A8I6XWQ1;A0A8I6Y4J8;A0A8I6YFL0;A0A8I6YH05;A0A8I6YHI9;A0A8I6YQI6;A0A8I6YQU0;A0A8I6YTX6;A0A8I6YWJ4;A0A8I6Z0L1;A0A8I6Z9Z3;A0A8I7B4C5;A0A8I7B5I9;A0A8I7B654;A0A8I7BBH0;A0A8I7BCM2;A0A8I7BE86;A0A8I7BJR0;F2CQ03;F2CQV1;…
GO:0044711	single-organism biosynthetic process	50	342	0.841535	0.9741	A0A2P1AB13;A0A5C1YV39;A0A8I6WDS1;A0A8I6WHD1;A0A8I6WKM0;A0A8I6WQV8;A0A8I6WWJ7;A0A8I6X6B1;A0A8I6XD03;A0A8I6XFM9;A0A8I6XI70;A0A8I6XPB3;A0A8I6XUG0;A0A8I6Y4J8;A0A8I6YFL0;A0A8I6YFN2;A0A8I6YHI9;A0A8I6YQI6;A0A8I6YQU0;A0A8I6YWJ4;A0A8I7B4C5;A0A8I7BBH0;A0A8I7BFU9;A0A8I7BJR0;C3W8L3;D7USP2;F2CPM4;F2CPX3;F2CQV1;F2CVM4;F2CW53;F2CWQ6;F2D119;F2D643;F2DEG9;F2DJJ2;F2DQH1;F2DR63;F2DSZ9;F2DXB7;F2DYM4;F2DZK7;F2E2C7;F2…
GO:0008299	isoprenoid biosynthetic process	2	19	0.842076	0.9741	F2DZK7;Q673G6
GO:0006612	protein targeting to membrane	3	27	0.842204	0.9741	A0A8I6ZAC4;F2CV17;F2CWN4
GO:0042451	purine nucleoside biosynthetic process	3	27	0.842204	0.9741	A0A5C1YV39;F2CWQ6;F2DJJ2
GO:0046129	purine ribonucleoside biosynthetic process	3	27	0.842204	0.9741	A0A5C1YV39;F2CWQ6;F2DJJ2
GO:0051128	regulation of cellular component organization	3	27	0.842204	0.9741	A0A8I6XEF6;A0A8I6XJN9;M0XN08
GO:1901135	carbohydrate derivative metabolic process	31	219	0.843517	0.974874	A0A0U2GJJ3;A0A0U2GJL1;A0A3S9KBF3;A0A5C1YV39;A0A8I6WHD1;A0A8I6WKM0;A0A8I6WTI3;A0A8I6X6B1;A0A8I6XBW8;A0A8I6XD03;A0A8I6XH22;A0A8I6XH57;A0A8I6XRV2;A0A8I6YH05;A0A8I7B1F6;A0A8I7B5I9;A0A8I7BBH0;A0A8I7BCM2;A0A8I7BII2;F2CQV1;F2CT87;F2CW03;F2CWQ6;F2D119;F2D7B2;F2DJJ2;F2DMM2;F2DSU7;F2E2B0;F2EIL0;F2EL27
GO:0009889	regulation of biosynthetic process	13	99	0.846275	0.977316	A0A8I6XCP7;A0A8I6XDB4;A0A8I6XEF6;A0A8I6Z4M3;A0A8I6Z9Z3;A0A8I7BE86;A1XXI9;F2CQ03;F2D6M6;F2DSZ9;F2EHE1;F2EJZ7;M0Y7Q2
GO:0010629	negative regulation of gene expression	4	35	0.847711	0.978227	A0A8I6Z9Z3;F2CQ03;F2D6M6;M0Y7Q2
GO:0009057	macromolecule catabolic process	31	220	0.850654	0.979724	A0A287NWK0;A0A8I6W6F0;A0A8I6WKG3;A0A8I6WS80;A0A8I6WT04;A0A8I6XEP7;A0A8I6XH57;A0A8I6XJN9;A0A8I6Y0T7;A0A8I6Y2P0;A0A8I6Y7K8;A0A8I6YF06;A0A8I6YF87;A0A8I6YIR4;A0A8I6YNI8;A0A8I7B6R2;A0A8I7BFU9;A0MMD3;B4ESE6;F2D7S9;F2D894;F2DC74;F2DDC9;F2DHP2;F2DJW8;F2DUJ6;F2DUR4;F2E6T9;F2EFV1;F2ELP4;Q42835
GO:0044272	sulfur compound biosynthetic process	5	43	0.8551	0.979724	A0A5C1YV39;A0A8I6YFN2;A0A8I6YQI6;A0A8I6YWJ4;F2EDT9
GO:0010556	regulation of macromolecule biosynthetic process	12	93	0.855445	0.979724	A0A8I6XCP7;A0A8I6XDB4;A0A8I6XEF6;A0A8I6Z4M3;A0A8I6Z9Z3;A0A8I7BE86;A1XXI9;F2CQ03;F2D6M6;F2EHE1;F2EJZ7;M0Y7Q2
GO:2000112	regulation of cellular macromolecule biosynthetic process	12	93	0.855445	0.979724	A0A8I6XCP7;A0A8I6XDB4;A0A8I6XEF6;A0A8I6Z4M3;A0A8I6Z9Z3;A0A8I7BE86;A1XXI9;F2CQ03;F2D6M6;F2EHE1;F2EJZ7;M0Y7Q2
GO:0006886	intracellular protein transport	28	201	0.856181	0.979724	A0A287NWK0;A0A287Q7U2;A0A8I6WF91;A0A8I6WHM6;A0A8I6WIA9;A0A8I6WIT4;A0A8I6WMI1;A0A8I6X2Y8;A0A8I6X8X0;A0A8I6XBH2;A0A8I6XEC2;A0A8I6XNN7;A0A8I6XZV6;A0A8I6YC75;A0A8I6Z7P9;A0A8I6ZAC4;A0A8I7B654;F2CV17;F2CWN4;F2CXT5;F2DIG1;F2DKP3;F2DRI5;F2DVC1;F2E0U3;F2E298;F2E3M7;F2E405
GO:0000288	nuclear-transcribed mRNA catabolic process, deadenylation-dependent decay	1	11	0.860008	0.979724	A0A8I6YF06
GO:0000902	cell morphogenesis	1	11	0.860008	0.979724	Q673G6
GO:0002376	immune system process	1	11	0.860008	0.979724	A0A8I6XTL4
GO:0006086	acetyl-CoA biosynthetic process from pyruvate	1	11	0.860008	0.979724	A0A8I6YFN2
GO:0006108	malate metabolic process	1	11	0.860008	0.979724	F2ELT5
GO:0009074	aromatic amino acid family catabolic process	1	11	0.860008	0.979724	A0A8I6YTX6
GO:0009743	response to carbohydrate	1	11	0.860008	0.979724	F2DSZ9
GO:0016049	cell growth	1	11	0.860008	0.979724	Q673G6
GO:0016236	macroautophagy	1	11	0.860008	0.979724	A0A8I7B6R2
GO:0032989	cellular component morphogenesis	1	11	0.860008	0.979724	Q673G6
GO:0048589	developmental growth	1	11	0.860008	0.979724	Q673G6
GO:0051651	maintenance of location in cell	1	11	0.860008	0.979724	F2CWB3
GO:0006357	regulation of transcription from RNA polymerase II promoter	2	20	0.862536	0.981127	F2EJZ7;M0Y7Q2
GO:0009112	nucleobase metabolic process	2	20	0.862536	0.981127	A0A8I6WKM0;F2EIL0
GO:0044042	glucan metabolic process	4	36	0.863191	0.981134	A0A2P1AB13;A0A8I7BFU9;C3W8L3;Q42835
GO:0044262	cellular carbohydrate metabolic process	9	73	0.866549	0.983598	A0A2P1AB13;A0A8I6XFM0;A0A8I6XI70;A0A8I6XUU4;A0A8I7BFU9;C3W8L3;F2DQH1;M0WQ79;Q4A1H2
GO:0034641	cellular nitrogen compound metabolic process	119	784	0.866658	0.983598	A0A0U2GJJ3;A0A0U2GJL1;A0A287EZS0;A0A287U5M5;A0A3S9KBF3;A0A5C1YV39;A0A8I6WB19;A0A8I6WDS1;A0A8I6WFJ6;A0A8I6WHD1;A0A8I6WKM0;A0A8I6WQV8;A0A8I6WT04;A0A8I6WTI3;A0A8I6WV37;A0A8I6X472;A0A8I6X6B1;A0A8I6XBW8;A0A8I6XCP7;A0A8I6XD03;A0A8I6XD40;A0A8I6XDB4;A0A8I6XEF6;A0A8I6XEM6;A0A8I6XEW3;A0A8I6XF02;A0A8I6XFM9;A0A8I6XQQ9;A0A8I6XQX4;A0A8I6XUG0;A0A8I6XWQ1;A0A8I6Y6M4;A0A8I6YF06;A0A8I6YH05;A0A8I6YL06;A0A8I6YQI6;A0A…
GO:0071704	organic substance metabolic process	251	1596	0.869352	0.985917	A0A0U2GJJ3;A0A0U2GJL1;A0A287EZS0;A0A287ILG2;A0A287NWK0;A0A287U5M5;A0A2P1AB13;A0A3S9KBF3;A0A5C1YV39;A0A8I6W6F0;A0A8I6WB19;A0A8I6WD99;A0A8I6WDS1;A0A8I6WFJ6;A0A8I6WGG3;A0A8I6WH69;A0A8I6WHD1;A0A8I6WKG3;A0A8I6WKM0;A0A8I6WQV8;A0A8I6WS80;A0A8I6WT04;A0A8I6WT13;A0A8I6WT14;A0A8I6WTI3;A0A8I6WV37;A0A8I6WVW5;A0A8I6WWJ7;A0A8I6WXY7;A0A8I6X0M9;A0A8I6X472;A0A8I6X6B1;A0A8I6X6J9;A0A8I6X6P0;A0A8I6X7M2;A0A8I6X7P5;A0A…
GO:0008104	protein localization	40	283	0.875488	0.989516	A0A287FZ34;A0A287LRJ1;A0A287NWK0;A0A287Q7U2;A0A8I6WF91;A0A8I6WHM6;A0A8I6WIA9;A0A8I6WIT4;A0A8I6WMI1;A0A8I6X0Z2;A0A8I6X2Y8;A0A8I6X8X0;A0A8I6XB86;A0A8I6XBH2;A0A8I6XEC2;A0A8I6XNN7;A0A8I6XZV6;A0A8I6YC75;A0A8I6YEZ5;A0A8I6YXG1;A0A8I6Z7P9;A0A8I6ZAC4;A0A8I7B2K7;A0A8I7B654;F2CV17;F2CV36;F2CWB3;F2CWN4;F2CXT5;F2CYK2;F2DIG1;F2DKP3;F2DP42;F2DRI5;F2DVC1;F2E0U3;F2E298;F2E3M7;F2E405;M0XN08
GO:0005996	monosaccharide metabolic process	8	67	0.878917	0.989516	A0A287ILG2;A0A3S9KBF3;A0A8I6Y7K8;A0A8I6YK25;F2CQV1;F2CU23;F2CW03;F2DEG9
GO:0006890	retrograde vesicle-mediated transport, Golgi to ER	2	21	0.880544	0.989516	F2CRN1;F2CWB3
GO:0009225	nucleotide-sugar metabolic process	2	21	0.880544	0.989516	A0A0U2GJJ3;A0A0U2GJL1
GO:0046148	pigment biosynthetic process	2	21	0.880544	0.989516	D7USP2;F2DSZ9
GO:0051656	establishment of organelle localization	2	21	0.880544	0.989516	A0A8I6WTQ8;A0A8I6ZAC4
GO:0006536	glutamate metabolic process	1	12	0.882976	0.989516	F2E0P9
GO:0009082	branched-chain amino acid biosynthetic process	1	12	0.882976	0.989516	A0A8I7B4C5
GO:0009658	chloroplast organization	1	12	0.882976	0.989516	F2DZG4
GO:0019321	pentose metabolic process	1	12	0.882976	0.989516	A0A8I6Y7K8
GO:0033014	tetrapyrrole biosynthetic process	1	12	0.882976	0.989516	F2DC91
GO:0042147	retrograde transport, endosome to Golgi	1	12	0.882976	0.989516	A0A8I6XEC2
GO:0042255	ribosome assembly	1	12	0.882976	0.989516	F2DFA6
GO:0043162	ubiquitin-dependent protein catabolic process via the multivesicular body sorting pathway	1	12	0.882976	0.989516	A0A287NWK0
GO:0045935	positive regulation of nucleobase-containing compound metabolic process	1	12	0.882976	0.989516	A1XXI9
GO:0044265	cellular macromolecule catabolic process	21	158	0.882983	0.989516	A0A287NWK0;A0A8I6WKG3;A0A8I6WT04;A0A8I6XEP7;A0A8I6XJN9;A0A8I6Y0T7;A0A8I6Y2P0;A0A8I6YF06;A0A8I6YNI8;A0A8I7B6R2;A0MMD3;B4ESE6;F2D7S9;F2D894;F2DC74;F2DDC9;F2DHP2;F2DJW8;F2DUJ6;F2DUR4;F2E6T9
GO:0006793	phosphorus metabolic process	39	278	0.883927	0.989842	A0A287FP91;A0A3S9KBF3;A0A5C1YV39;A0A8I6WHD1;A0A8I6WKM0;A0A8I6WTI3;A0A8I6WXW1;A0A8I6X017;A0A8I6X6B1;A0A8I6XBW8;A0A8I6XD03;A0A8I6YFN2;A0A8I6YH05;A0A8I6YIV5;A0A8I6YMC3;A0A8I6Z0S4;A0A8I7B1F6;A0A8I7BBH0;A0A8I7BCM2;F2CPX3;F2CQV1;F2CT87;F2CW03;F2CWQ6;F2D119;F2D480;F2D7B2;F2DJJ2;F2DMM2;F2DS97;F2DSU7;F2DZF2;F2DZN2;F2E2B0;F2E2C7;F2E8P3;F2EIL0;F2EL27;M0XGU8
GO:0009791	post-embryonic development	6	53	0.886542	0.991154	A0A8I6WQV8;A0A8I6WXG8;F2DZK3;F2EKQ3;M0XNG3;Q673G6
GO:0060255	regulation of macromolecule metabolic process	21	159	0.889645	0.991154	A0A8I6WV37;A0A8I6XCP7;A0A8I6XDB4;A0A8I6XEF6;A0A8I6XJN9;A0A8I6YIV5;A0A8I6YL06;A0A8I6Z4M3;A0A8I6Z9Z3;A0A8I7BE86;A1XXI9;F2CQ03;F2CXL5;F2D3D5;F2D6M6;F2DLR6;F2DZF2;F2E3M7;F2EHE1;F2EJZ7;M0Y7Q2
GO:0009653	anatomical structure morphogenesis	3	30	0.890193	0.991154	A0A8I6WJN4;A0A8I6Y180;Q673G6
GO:0080090	regulation of primary metabolic process	18	139	0.893036	0.991154	A0A8I6WV37;A0A8I6XCP7;A0A8I6XDB4;A0A8I6XEF6;A0A8I6XJN9;A0A8I6YIV5;A0A8I6YL06;A0A8I6Z4M3;A0A8I6Z9Z3;A0A8I7BE86;A1XXI9;F2CQ03;F2D6M6;F2DSZ9;F2DZF2;F2EHE1;F2EJZ7;M0Y7Q2
GO:0006725	cellular aromatic compound metabolic process	91	615	0.894483	0.991154	A0A0U2GJJ3;A0A0U2GJL1;A0A287EZS0;A0A287U5M5;A0A3S9KBF3;A0A5C1YV39;A0A8I6WB26;A0A8I6WDS1;A0A8I6WFJ6;A0A8I6WHD1;A0A8I6WKM0;A0A8I6WNS5;A0A8I6WQV8;A0A8I6WT14;A0A8I6WTI3;A0A8I6WV37;A0A8I6X472;A0A8I6X6B1;A0A8I6XBW8;A0A8I6XCP7;A0A8I6XD03;A0A8I6XD40;A0A8I6XDB4;A0A8I6XEM6;A0A8I6XEW3;A0A8I6XF02;A0A8I6XFM9;A0A8I6XQQ9;A0A8I6XQX4;A0A8I6Y6M4;A0A8I6YF06;A0A8I6YFL0;A0A8I6YH05;A0A8I6YHI9;A0A8I6YL06;A0A8I6YS17;A0A…
GO:0044237	cellular metabolic process	230	1476	0.894847	0.991154	A0A0U2GJJ3;A0A0U2GJL1;A0A287EZS0;A0A287FP91;A0A287NWK0;A0A287PY01;A0A287U5M5;A0A2P1AB13;A0A3S9KBF3;A0A5C1YV39;A0A8I6WB19;A0A8I6WB26;A0A8I6WDS1;A0A8I6WFJ6;A0A8I6WGG3;A0A8I6WHD1;A0A8I6WKG3;A0A8I6WKM0;A0A8I6WNS5;A0A8I6WQV8;A0A8I6WT04;A0A8I6WT14;A0A8I6WTI3;A0A8I6WV37;A0A8I6WWJ7;A0A8I6WXW1;A0A8I6X017;A0A8I6X0M9;A0A8I6X472;A0A8I6X6B1;A0A8I6X6J9;A0A8I6X7M2;A0A8I6X7Q6;A0A8I6XBW8;A0A8I6XCP7;A0A8I6XCQ2;A0A…
GO:0009620	response to fungus	2	22	0.896353	0.991154	A0A8I7BCT1;F2EGM1
GO:0009966	regulation of signal transduction	2	22	0.896353	0.991154	A0A8I7B2K7;M0V3S6
GO:0050832	defense response to fungus	2	22	0.896353	0.991154	A0A8I7BCT1;F2EGM1
GO:0044283	small molecule biosynthetic process	24	181	0.899654	0.991154	A0A5C1YV39;A0A8I6WWJ7;A0A8I6XFM9;A0A8I6XPB3;A0A8I6Y4J8;A0A8I6YFL0;A0A8I6YHI9;A0A8I6YQI6;A0A8I6YQU0;A0A8I6YWJ4;A0A8I7B4C5;A0A8I7BJR0;F2CQV1;F2CW53;F2D643;F2DEG9;F2DR63;F2DSZ9;F2DYM4;F2DZK7;F2E2C7;F2E3I7;F2EDT9;Q673G6
GO:0005975	carbohydrate metabolic process	37	268	0.900058	0.991154	A0A287ILG2;A0A2P1AB13;A0A3S9KBF3;A0A8I6W6F0;A0A8I6WD99;A0A8I6WH69;A0A8I6WS80;A0A8I6WVW5;A0A8I6WXY7;A0A8I6X6P0;A0A8I6XBW8;A0A8I6XFM0;A0A8I6XH22;A0A8I6XH57;A0A8I6XI70;A0A8I6XPG4;A0A8I6XRV2;A0A8I6XUU4;A0A8I6Y7K8;A0A8I6YF87;A0A8I6YIR4;A0A8I6YK25;A0A8I7B5I9;A0A8I7BCM2;A0A8I7BFU9;A0A8I7BII2;C3W8L3;F2CQV1;F2CU23;F2CW03;F2DEG9;F2DQH1;F2EFV1;F2ELP4;M0WQ79;Q42835;Q4A1H2
GO:0017038	protein import	7	62	0.901632	0.991154	A0A8I6WF91;A0A8I6WIA9;A0A8I6XBH2;F2CXT5;F2DIG1;F2E3M7;F2E405
GO:0046483	heterocycle metabolic process	85	579	0.902111	0.991154	A0A0U2GJJ3;A0A0U2GJL1;A0A287EZS0;A0A287U5M5;A0A3S9KBF3;A0A5C1YV39;A0A8I6WDS1;A0A8I6WFJ6;A0A8I6WHD1;A0A8I6WKM0;A0A8I6WQV8;A0A8I6WTI3;A0A8I6WV37;A0A8I6X472;A0A8I6X6B1;A0A8I6XBW8;A0A8I6XCP7;A0A8I6XD03;A0A8I6XD40;A0A8I6XDB4;A0A8I6XEM6;A0A8I6XEW3;A0A8I6XF02;A0A8I6XFM9;A0A8I6XQQ9;A0A8I6XQX4;A0A8I6Y6M4;A0A8I6YF06;A0A8I6YH05;A0A8I6YL06;A0A8I6YQI6;A0A8I6YQU0;A0A8I6YS17;A0A8I6YSL3;A0A8I6YTX6;A0A8I6YWJ4;A0A…
GO:0000387	spliceosomal snRNP assembly	1	13	0.902183	0.991154	A0A8I6XEW3
GO:0006525	arginine metabolic process	1	13	0.902183	0.991154	F2CW53
GO:0006623	protein targeting to vacuole	1	13	0.902183	0.991154	A0A287NWK0
GO:0016458	gene silencing	1	13	0.902183	0.991154	M0Y7Q2
GO:0033043	regulation of organelle organization	1	13	0.902183	0.991154	A0A8I6XJN9
GO:0040029	regulation of gene expression, epigenetic	1	13	0.902183	0.991154	M0Y7Q2
GO:0044247	cellular polysaccharide catabolic process	1	13	0.902183	0.991154	A0A8I7BFU9
GO:0045036	protein targeting to chloroplast	1	13	0.902183	0.991154	A0A8I6XNN7
GO:0072596	establishment of protein localization to chloroplast	1	13	0.902183	0.991154	A0A8I6XNN7
GO:0072598	protein localization to chloroplast	1	13	0.902183	0.991154	A0A8I6XNN7
GO:0072665	protein localization to vacuole	1	13	0.902183	0.991154	A0A287NWK0
GO:0072666	establishment of protein localization to vacuole	1	13	0.902183	0.991154	A0A287NWK0
GO:1901698	response to nitrogen compound	1	13	0.902183	0.991154	F2E0P9
GO:0019748	secondary metabolic process	3	31	0.90302	0.991154	F2CPM4;F2E7V8;W8E7E3
GO:0072657	protein localization to membrane	5	47	0.90343	0.991154	A0A8I6ZAC4;F2CV17;F2CWN4;F2CYK2;M0XN08
GO:0007049	cell cycle	6	55	0.906514	0.993154	A0A8I6WDS1;A0A8I6XJN9;A0A8I6Y3M9;F2D4P0;F2D8Z5;F2DNW4
GO:0006720	isoprenoid metabolic process	2	23	0.910198	0.993154	F2DZK7;Q673G6
GO:0044275	cellular carbohydrate catabolic process	2	23	0.910198	0.993154	A0A8I6XUU4;A0A8I7BFU9
GO:0016070	RNA metabolic process	38	277	0.910994	0.993154	A0A8I6WFJ6;A0A8I6WQV8;A0A8I6X472;A0A8I6XCP7;A0A8I6XD40;A0A8I6XDB4;A0A8I6XEM6;A0A8I6XEW3;A0A8I6XF02;A0A8I6XQQ9;A0A8I6Y6M4;A0A8I6YF06;A0A8I6YSL3;A0A8I6Z4M3;A0A8I7B3E6;A0A8I7BEI9;A1XXI9;F2CQY5;F2CRA3;F2CS23;F2D205;F2D483;F2D6G3;F2DDD5;F2DE93;F2DP88;F2DUE6;F2E0C0;F2E556;F2E5S3;F2E941;F2ECG8;F2EFV3;F2EG94;F2EHE1;F2EJZ7;M0XNG3;M0Y7Q2
GO:0019219	regulation of nucleobase-containing compound metabolic process	9	78	0.911572	0.993154	A0A8I6WV37;A0A8I6XCP7;A0A8I6XDB4;A0A8I6YL06;A0A8I6Z4M3;A1XXI9;F2EHE1;F2EJZ7;M0Y7Q2
GO:0006139	nucleobase-containing compound metabolic process	75	518	0.91212	0.993154	A0A0U2GJJ3;A0A0U2GJL1;A0A287EZS0;A0A287U5M5;A0A3S9KBF3;A0A5C1YV39;A0A8I6WDS1;A0A8I6WFJ6;A0A8I6WHD1;A0A8I6WKM0;A0A8I6WQV8;A0A8I6WTI3;A0A8I6WV37;A0A8I6X472;A0A8I6X6B1;A0A8I6XBW8;A0A8I6XCP7;A0A8I6XD03;A0A8I6XD40;A0A8I6XDB4;A0A8I6XEM6;A0A8I6XEW3;A0A8I6XF02;A0A8I6XQQ9;A0A8I6Y6M4;A0A8I6YF06;A0A8I6YH05;A0A8I6YL06;A0A8I6YS17;A0A8I6YSL3;A0A8I6YZG5;A0A8I6Z4M3;A0A8I7B3E6;A0A8I7BBH0;A0A8I7BCM2;A0A8I7BEI9;A1X…
GO:0044270	cellular nitrogen compound catabolic process	4	40	0.912346	0.993154	A0A8I6YF06;A0A8I6YTX6;A0A8I7BBH0;F2DC91
GO:0072594	establishment of protein localization to organelle	13	107	0.91247	0.993154	A0A287NWK0;A0A8I6WF91;A0A8I6WIA9;A0A8I6XBH2;A0A8I6XNN7;A0A8I7B654;F2CV17;F2CWN4;F2CXT5;F2DIG1;F2DVC1;F2E3M7;F2E405
GO:0048193	Golgi vesicle transport	10	86	0.91649	0.993154	A0A8I6WHM6;A0A8I6WMI1;A0A8I6WTQ8;A0A8I6X2Y8;A0A8I6XLR3;A0A8I6YC75;A0A8I6ZAC4;F2CRN1;F2CWB3;F2E298
GO:0015031	protein transport	36	265	0.916548	0.993154	A0A287FZ34;A0A287LRJ1;A0A287NWK0;A0A287Q7U2;A0A8I6WF91;A0A8I6WHM6;A0A8I6WIA9;A0A8I6WIT4;A0A8I6WMI1;A0A8I6X0Z2;A0A8I6X2Y8;A0A8I6X8X0;A0A8I6XB86;A0A8I6XBH2;A0A8I6XEC2;A0A8I6XNN7;A0A8I6XZV6;A0A8I6YC75;A0A8I6YEZ5;A0A8I6Z7P9;A0A8I6ZAC4;A0A8I7B2K7;A0A8I7B654;F2CV17;F2CV36;F2CWN4;F2CXT5;F2DIG1;F2DKP3;F2DP42;F2DRI5;F2DVC1;F2E0U3;F2E298;F2E3M7;F2E405
GO:0019637	organophosphate metabolic process	25	191	0.916623	0.993154	A0A3S9KBF3;A0A5C1YV39;A0A8I6WHD1;A0A8I6WKM0;A0A8I6WTI3;A0A8I6X6B1;A0A8I6XBW8;A0A8I6XD03;A0A8I6YH05;A0A8I7B1F6;A0A8I7BBH0;A0A8I7BCM2;F2CPX3;F2CQV1;F2CT87;F2CW03;F2CWQ6;F2D119;F2D7B2;F2DJJ2;F2DMM2;F2DSU7;F2E2B0;F2EIL0;F2EL27
GO:0033365	protein localization to organelle	15	122	0.917575	0.993154	A0A287NWK0;A0A8I6WF91;A0A8I6WIA9;A0A8I6XBH2;A0A8I6XNN7;A0A8I7B654;F2CV17;F2CWB3;F2CWN4;F2CXT5;F2DIG1;F2DVC1;F2E3M7;F2E405;M0XN08
GO:0000470	maturation of LSU-rRNA	1	14	0.918243	0.993154	F2E0C0
GO:0008202	steroid metabolic process	1	14	0.918243	0.993154	F2D1W8
GO:0048367	shoot system development	1	14	0.918243	0.993154	Q673G6
GO:0090114	COPII-coated vesicle budding	1	14	0.918243	0.993154	A0A8I6WMI1
GO:0044710	single-organism metabolic process	124	831	0.919569	0.993154	A0A287EZS0;A0A287ILG2;A0A287PY01;A0A287U5M5;A0A2P1AB13;A0A3S9KBF3;A0A5C1YV39;A0A8I6WDS1;A0A8I6WGG3;A0A8I6WHD1;A0A8I6WKM0;A0A8I6WQV8;A0A8I6WT14;A0A8I6WTI3;A0A8I6WWJ7;A0A8I6X6B1;A0A8I6X6J9;A0A8I6X7P5;A0A8I6XBW8;A0A8I6XCQ2;A0A8I6XD03;A0A8I6XFM0;A0A8I6XFM9;A0A8I6XH22;A0A8I6XH57;A0A8I6XI70;A0A8I6XPB3;A0A8I6XQ26;A0A8I6XQX4;A0A8I6XRG5;A0A8I6XRV2;A0A8I6XTB9;A0A8I6XUG0;A0A8I6XUQ8;A0A8I6XUU4;A0A8I6Y4J8;A0A…
GO:0045184	establishment of protein localization	36	266	0.920701	0.993154	A0A287FZ34;A0A287LRJ1;A0A287NWK0;A0A287Q7U2;A0A8I6WF91;A0A8I6WHM6;A0A8I6WIA9;A0A8I6WIT4;A0A8I6WMI1;A0A8I6X0Z2;A0A8I6X2Y8;A0A8I6X8X0;A0A8I6XB86;A0A8I6XBH2;A0A8I6XEC2;A0A8I6XNN7;A0A8I6XZV6;A0A8I6YC75;A0A8I6YEZ5;A0A8I6Z7P9;A0A8I6ZAC4;A0A8I7B2K7;A0A8I7B654;F2CV17;F2CV36;F2CWN4;F2CXT5;F2DIG1;F2DKP3;F2DP42;F2DRI5;F2DVC1;F2E0U3;F2E298;F2E3M7;F2E405
GO:0009063	cellular amino acid catabolic process	5	49	0.921853	0.993154	A0A8I6YTX6;A0A8I6Z0L1;F2DDV8;F2DZ70;F2E0P9
GO:0010608	posttranscriptional regulation of gene expression	5	49	0.921853	0.993154	A0A8I6XEF6;A0A8I6Z9Z3;A0A8I7BE86;F2CQ03;F2D6M6
GO:0046700	heterocycle catabolic process	4	41	0.921876	0.993154	A0A8I6YF06;A0A8I6YTX6;A0A8I7BBH0;F2DC91
GO:0010646	regulation of cell communication	2	24	0.922299	0.993154	A0A8I7B2K7;M0V3S6
GO:1902580	single-organism cellular localization	19	151	0.922901	0.993154	A0A287NWK0;A0A8I6WF91;A0A8I6WIA9;A0A8I6WMI1;A0A8I6WTQ8;A0A8I6XBH2;A0A8I6XNN7;A0A8I6ZAC4;A0A8I7B654;F2CV17;F2CWN4;F2CXT5;F2CYK2;F2DIG1;F2DVC1;F2DVS7;F2E3M7;F2E405;M0XN08
GO:0010468	regulation of gene expression	16	130	0.922908	0.993154	A0A8I6XCP7;A0A8I6XDB4;A0A8I6XEF6;A0A8I6Z4M3;A0A8I6Z9Z3;A0A8I7BE86;A1XXI9;F2CQ03;F2CXL5;F2D3D5;F2D6M6;F2DLR6;F2E3M7;F2EHE1;F2EJZ7;M0Y7Q2
GO:0006073	cellular glucan metabolic process	3	33	0.924696	0.993154	A0A2P1AB13;A0A8I7BFU9;C3W8L3
GO:1901360	organic cyclic compound metabolic process	93	638	0.927338	0.993154	A0A0U2GJJ3;A0A0U2GJL1;A0A287EZS0;A0A287U5M5;A0A3S9KBF3;A0A5C1YV39;A0A8I6WDS1;A0A8I6WFJ6;A0A8I6WHD1;A0A8I6WKM0;A0A8I6WQV8;A0A8I6WT14;A0A8I6WTI3;A0A8I6WV37;A0A8I6X472;A0A8I6X6B1;A0A8I6XBW8;A0A8I6XCP7;A0A8I6XD03;A0A8I6XD40;A0A8I6XDB4;A0A8I6XEM6;A0A8I6XEW3;A0A8I6XF02;A0A8I6XFM9;A0A8I6XQQ9;A0A8I6XQX4;A0A8I6Y6M4;A0A8I6YF06;A0A8I6YFL0;A0A8I6YH05;A0A8I6YHI9;A0A8I6YL06;A0A8I6YQI6;A0A8I6YQU0;A0A8I6YS17;A0A…
GO:0006085	acetyl-CoA biosynthetic process	1	15	0.931672	0.993154	A0A8I6YFN2
GO:0006261	DNA-dependent DNA replication	1	15	0.931672	0.993154	A0A8I6WDS1
GO:0006875	cellular metal ion homeostasis	1	15	0.931672	0.993154	F2D2S2
GO:0007015	actin filament organization	1	15	0.931672	0.993154	A0A8I6YKQ7
GO:0009657	plastid organization	1	15	0.931672	0.993154	F2DZG4
GO:0040007	growth	1	15	0.931672	0.993154	Q673G6
GO:0055065	metal ion homeostasis	1	15	0.931672	0.993154	F2D2S2
GO:0044712	single-organism catabolic process	28	215	0.932273	0.993154	A0A287ILG2;A0A287PY01;A0A8I6X6J9;A0A8I6XBW8;A0A8I6XCQ2;A0A8I6XQ26;A0A8I6XRG5;A0A8I6XTB9;A0A8I6XUQ8;A0A8I6XUU4;A0A8I6YF87;A0A8I6YHJ3;A0A8I6YK25;A0A8I6YTX6;A0A8I6YXG5;A0A8I6Z0L1;A0A8I7BBH0;A0A8I7BCM2;F2CPL2;F2CQV1;F2CW03;F2D005;F2D1C6;F2DDV8;F2DHZ5;F2DSA8;F2DZ70;F2E0P9
GO:0006629	lipid metabolic process	17	139	0.932749	0.993154	A0A5C1YV39;A0A8I6X7P5;A0A8I6XCQ2;A0A8I6XRG5;A0A8I6XUQ8;A0A8I6YMC3;F2CPX3;F2CQA9;F2D1C6;F2D1W8;F2DHZ5;F2DSZ9;F2DZK7;M0WQ79;M0YR50;Q38JE4;Q673G6
GO:0009069	serine family amino acid metabolic process	2	25	0.932853	0.993154	F2DDV8;F2DZ70
GO:0023051	regulation of signaling	2	25	0.932853	0.993154	A0A8I7B2K7;M0V3S6
GO:0043241	protein complex disassembly	2	25	0.932853	0.993154	A0A8I6XEF6;A0A8I6Y871
GO:0051171	regulation of nitrogen compound metabolic process	14	118	0.934431	0.993154	A0A8I6WV37;A0A8I6XCP7;A0A8I6XDB4;A0A8I6XEF6;A0A8I6YL06;A0A8I6Z4M3;A0A8I6Z9Z3;A0A8I7BE86;A1XXI9;F2CQ03;F2D6M6;F2EHE1;F2EJZ7;M0Y7Q2
GO:1901575	organic substance catabolic process	54	390	0.937639	0.993154	A0A287ILG2;A0A287NWK0;A0A8I6W6F0;A0A8I6WKG3;A0A8I6WS80;A0A8I6WT04;A0A8I6X6J9;A0A8I6XBW8;A0A8I6XCQ2;A0A8I6XEP7;A0A8I6XH57;A0A8I6XJN9;A0A8I6XQ26;A0A8I6XRG5;A0A8I6XUQ8;A0A8I6XUU4;A0A8I6Y0T7;A0A8I6Y2P0;A0A8I6Y7K8;A0A8I6YF06;A0A8I6YF87;A0A8I6YIR4;A0A8I6YK25;A0A8I6YNI8;A0A8I6YTX6;A0A8I6Z0L1;A0A8I7B6R2;A0A8I7BBH0;A0A8I7BCM2;A0A8I7BFU9;A0MMD3;B4ESE6;F2CQV1;F2CW03;F2D005;F2D1C6;F2D7S9;F2D894;F2DC74;F2DC91…
GO:1901606	alpha-amino acid catabolic process	4	43	0.938196	0.993154	A0A8I6YTX6;F2DDV8;F2DZ70;F2E0P9
GO:0009056	catabolic process	60	430	0.939659	0.993154	A0A287ILG2;A0A287NWK0;A0A287PY01;A0A8I6W6F0;A0A8I6WKG3;A0A8I6WS80;A0A8I6WT04;A0A8I6X6J9;A0A8I6XBW8;A0A8I6XCQ2;A0A8I6XEP7;A0A8I6XH57;A0A8I6XJN9;A0A8I6XQ26;A0A8I6XRG5;A0A8I6XTB9;A0A8I6XUQ8;A0A8I6XUU4;A0A8I6Y0T7;A0A8I6Y2P0;A0A8I6Y7K8;A0A8I6YF06;A0A8I6YF87;A0A8I6YHJ3;A0A8I6YIR4;A0A8I6YK25;A0A8I6YNI8;A0A8I6YTX6;A0A8I6YXG5;A0A8I6Z0L1;A0A8I7B6R2;A0A8I7BBH0;A0A8I7BCM2;A0A8I7BFU9;A0MMD3;B4ESE6;F2CPL2;F2CQ…
GO:0006633	fatty acid biosynthetic process	2	26	0.942042	0.993154	A0A5C1YV39;F2DSZ9
GO:0006637	acyl-CoA metabolic process	2	26	0.942042	0.993154	A0A5C1YV39;A0A8I6YFN2
GO:0035383	thioester metabolic process	2	26	0.942042	0.993154	A0A5C1YV39;A0A8I6YFN2
GO:0006022	aminoglycan metabolic process	1	16	0.9429	0.993154	A0A8I7B5I9
GO:0006555	methionine metabolic process	1	16	0.9429	0.993154	A0A8I6YWJ4
GO:0006650	glycerophospholipid metabolic process	1	16	0.9429	0.993154	F2CPX3
GO:0008654	phospholipid biosynthetic process	1	16	0.9429	0.993154	F2CPX3
GO:0009086	methionine biosynthetic process	1	16	0.9429	0.993154	A0A8I6YWJ4
GO:0030036	actin cytoskeleton organization	1	16	0.9429	0.993154	A0A8I6YKQ7
GO:0042026	protein refolding	1	16	0.9429	0.993154	A0A8I6XX88
GO:0043094	cellular metabolic compound salvage	1	16	0.9429	0.993154	F2CVA4
GO:0080134	regulation of response to stress	1	16	0.9429	0.993154	F2CPL2
GO:0022618	ribonucleoprotein complex assembly	7	68	0.944625	0.993154	A0A8I6X1I1;A0A8I6XEW3;A0A8I6XWQ1;F2D6M6;F2D788;F2DFA6;F2DXD4
GO:0006807	nitrogen compound metabolic process	136	917	0.94506	0.993154	A0A0U2GJJ3;A0A0U2GJL1;A0A287EZS0;A0A287U5M5;A0A3S9KBF3;A0A5C1YV39;A0A8I6WB19;A0A8I6WDS1;A0A8I6WFJ6;A0A8I6WHD1;A0A8I6WKM0;A0A8I6WQV8;A0A8I6WT04;A0A8I6WTI3;A0A8I6WV37;A0A8I6WWJ7;A0A8I6X472;A0A8I6X6B1;A0A8I6XBW8;A0A8I6XCP7;A0A8I6XD03;A0A8I6XD40;A0A8I6XDB4;A0A8I6XEF6;A0A8I6XEM6;A0A8I6XEW3;A0A8I6XF02;A0A8I6XFM9;A0A8I6XPB3;A0A8I6XQQ9;A0A8I6XQX4;A0A8I6XUG0;A0A8I6XWQ1;A0A8I6Y4J8;A0A8I6Y6M4;A0A8I6YF06;A0A…
GO:0009108	coenzyme biosynthetic process	4	44	0.945139	0.993154	A0A5C1YV39;A0A8I6YFN2;F2DR63;F2DYM4
GO:0048583	regulation of response to stimulus	3	36	0.949006	0.993154	A0A8I7B2K7;F2CPL2;M0V3S6
GO:0090150	establishment of protein localization to membrane	3	36	0.949006	0.993154	A0A8I6ZAC4;F2CV17;F2CWN4
GO:0032502	developmental process	13	114	0.949123	0.993154	A0A287TWK6;A0A8I6WJN4;A0A8I6WQV8;A0A8I6WXG8;A0A8I6XBD2;A0A8I6Y180;A0A8I6Z1P9;A0A8I7B5R8;F2DZK3;F2E3M7;F2EKQ3;M0XNG3;Q673G6
GO:0051252	regulation of RNA metabolic process	7	69	0.949888	0.993154	A0A8I6XCP7;A0A8I6XDB4;A0A8I6Z4M3;A1XXI9;F2EHE1;F2EJZ7;M0Y7Q2
GO:0071826	ribonucleoprotein complex subunit organization	7	69	0.949888	0.993154	A0A8I6X1I1;A0A8I6XEW3;A0A8I6XWQ1;F2D6M6;F2D788;F2DFA6;F2DXD4
GO:0022411	cellular component disassembly	2	27	0.950029	0.993154	A0A8I6XEF6;A0A8I6Y871
GO:0032984	macromolecular complex disassembly	2	27	0.950029	0.993154	A0A8I6XEF6;A0A8I6Y871
GO:0006098	pentose-phosphate shunt	1	17	0.952286	0.993154	A0A3S9KBF3
GO:0044264	cellular polysaccharide metabolic process	3	37	0.955332	0.993154	A0A2P1AB13;A0A8I7BFU9;C3W8L3
GO:0007017	microtubule-based process	2	28	0.95696	0.993154	A0A8I6YCQ1;F2E2M2
GO:0032501	multicellular organismal process	10	94	0.958281	0.993154	A0A8I6WQV8;A0A8I6WXG8;A0A8I6XBD2;A0A8I6XBH2;F2DZK3;F2E3M7;F2E3X1;F2EKQ3;M0XNG3;Q673G6
GO:0006576	cellular biogenic amine metabolic process	1	18	0.960133	0.993154	A0A8I6YTX6
GO:0019751	polyol metabolic process	1	18	0.960133	0.993154	M0WQ79
GO:0044106	cellular amine metabolic process	1	18	0.960133	0.993154	A0A8I6YTX6
GO:0006606	protein import into nucleus	2	29	0.962967	0.993154	A0A8I6XBH2;F2E3M7
GO:0034504	protein localization to nucleus	2	29	0.962967	0.993154	A0A8I6XBH2;F2E3M7
GO:0044744	protein targeting to nucleus	2	29	0.962967	0.993154	A0A8I6XBH2;F2E3M7
GO:0051170	nuclear import	2	29	0.962967	0.993154	A0A8I6XBH2;F2E3M7
GO:0051640	organelle localization	2	29	0.962967	0.993154	A0A8I6WTQ8;A0A8I6ZAC4
GO:1902593	single-organism nuclear import	2	29	0.962967	0.993154	A0A8I6XBH2;F2E3M7
GO:1901565	organonitrogen compound catabolic process	8	80	0.963485	0.993154	A0A8I6WT04;A0A8I6YTX6;A0A8I6Z0L1;A0A8I7BBH0;F2DC91;F2DDV8;F2DZ70;F2E0P9
GO:0044248	cellular catabolic process	45	341	0.963535	0.993154	A0A287NWK0;A0A287PY01;A0A8I6WKG3;A0A8I6WT04;A0A8I6X6J9;A0A8I6XCQ2;A0A8I6XEP7;A0A8I6XJN9;A0A8I6XQ26;A0A8I6XRG5;A0A8I6XTB9;A0A8I6XUQ8;A0A8I6XUU4;A0A8I6Y0T7;A0A8I6Y2P0;A0A8I6YF06;A0A8I6YHJ3;A0A8I6YNI8;A0A8I6YTX6;A0A8I6YXG5;A0A8I6Z0L1;A0A8I7B6R2;A0A8I7BBH0;A0A8I7BFU9;A0MMD3;B4ESE6;F2CPL2;F2D005;F2D1C6;F2D7S9;F2D894;F2DC74;F2DC91;F2DC93;F2DDC9;F2DDV8;F2DHP2;F2DHZ5;F2DJW8;F2DSA8;F2DUJ6;F2DUR4;F2DZ70;F2…
GO:0006396	RNA processing	20	169	0.963803	0.993154	A0A8I6WFJ6;A0A8I6X472;A0A8I6XD40;A0A8I6XEW3;A0A8I6XF02;A0A8I6XQQ9;A0A8I6Y6M4;A0A8I6YSL3;F2CQY5;F2CRA3;F2CS23;F2D205;F2D483;F2D6G3;F2DDD5;F2DE93;F2DP88;F2E0C0;F2E556;F2EG94
GO:0044281	small molecule metabolic process	79	565	0.963824	0.993154	A0A287ILG2;A0A3S9KBF3;A0A5C1YV39;A0A8I6WGG3;A0A8I6WHD1;A0A8I6WKM0;A0A8I6WQV8;A0A8I6WT14;A0A8I6WTI3;A0A8I6WWJ7;A0A8I6X6B1;A0A8I6X6J9;A0A8I6XBW8;A0A8I6XCQ2;A0A8I6XD03;A0A8I6XFM0;A0A8I6XFM9;A0A8I6XPB3;A0A8I6XQ26;A0A8I6XQX4;A0A8I6XRG5;A0A8I6XUQ8;A0A8I6Y4J8;A0A8I6Y7K8;A0A8I6YFL0;A0A8I6YFN2;A0A8I6YH05;A0A8I6YHI9;A0A8I6YK25;A0A8I6YQI6;A0A8I6YQU0;A0A8I6YTX6;A0A8I6YWJ4;A0A8I6Z0L1;A0A8I7B4C5;A0A8I7BBH0;A0A…
GO:0000097	sulfur amino acid biosynthetic process	1	19	0.966691	0.993154	A0A8I6YWJ4
GO:0000209	protein polyubiquitination	1	19	0.966691	0.993154	F2CQH9
GO:0000956	nuclear-transcribed mRNA catabolic process	1	19	0.966691	0.993154	A0A8I6YF06
GO:0009081	branched-chain amino acid metabolic process	1	19	0.966691	0.993154	A0A8I7B4C5
GO:0034976	response to endoplasmic reticulum stress	1	19	0.966691	0.993154	A0A8I6Y5Z0
GO:0046486	glycerolipid metabolic process	1	19	0.966691	0.993154	F2CPX3
GO:0051235	maintenance of location	1	19	0.966691	0.993154	F2CWB3
GO:0051188	cofactor biosynthetic process	5	57	0.968153	0.993154	A0A5C1YV39;A0A8I6YFN2;F2DC91;F2DR63;F2DYM4
GO:0048731	system development	7	74	0.970067	0.993154	A0A8I6WQV8;A0A8I6WXG8;F2DZK3;F2E3M7;F2EKQ3;M0XNG3;Q673G6
GO:0044255	cellular lipid metabolic process	12	113	0.970468	0.993154	A0A5C1YV39;A0A8I6XCQ2;A0A8I6XRG5;A0A8I6XUQ8;A0A8I6YMC3;F2CPX3;F2D1C6;F2DHZ5;F2DSZ9;F2DZK7;M0YR50;Q673G6
GO:0048856	anatomical structure development	10	98	0.971184	0.993154	A0A8I6WJN4;A0A8I6WQV8;A0A8I6WXG8;A0A8I6XBD2;A0A8I6Y180;F2DZK3;F2E3M7;F2EKQ3;M0XNG3;Q673G6
GO:0019362	pyridine nucleotide metabolic process	5	58	0.971679	0.993154	A0A3S9KBF3;A0A8I6XBW8;A0A8I7BCM2;F2CQV1;F2CW03
GO:0046496	nicotinamide nucleotide metabolic process	5	58	0.971679	0.993154	A0A3S9KBF3;A0A8I6XBW8;A0A8I7BCM2;F2CQV1;F2CW03
GO:0006739	NADP metabolic process	1	20	0.972173	0.993154	A0A3S9KBF3
GO:0019682	glyceraldehyde-3-phosphate metabolic process	1	20	0.972173	0.993154	A0A3S9KBF3
GO:0051156	glucose 6-phosphate metabolic process	1	20	0.972173	0.993154	A0A3S9KBF3
GO:1901136	carbohydrate derivative catabolic process	1	20	0.972173	0.993154	A0A8I7BBH0
GO:0000375	RNA splicing, via transesterification reactions	8	83	0.973005	0.993154	A0A8I6WFJ6;A0A8I6XEW3;A0A8I6XF02;A0A8I6XQQ9;A0A8I6Y6M4;F2D205;F2DE93;F2DP88
GO:0000377	RNA splicing, via transesterification reactions with bulged adenosine as nucleophile	8	83	0.973005	0.993154	A0A8I6WFJ6;A0A8I6XEW3;A0A8I6XF02;A0A8I6XQQ9;A0A8I6Y6M4;F2D205;F2DE93;F2DP88
GO:0000398	mRNA splicing, via spliceosome	8	83	0.973005	0.993154	A0A8I6WFJ6;A0A8I6XEW3;A0A8I6XF02;A0A8I6XQQ9;A0A8I6Y6M4;F2D205;F2DE93;F2DP88
GO:0019439	aromatic compound catabolic process	4	50	0.973823	0.993154	A0A8I6YF06;A0A8I6YTX6;A0A8I7BBH0;F2DC91
GO:0051186	cofactor metabolic process	15	137	0.974133	0.993154	A0A3S9KBF3;A0A5C1YV39;A0A8I6XBW8;A0A8I6XQX4;A0A8I6YFN2;A0A8I6YQI6;A0A8I6YWJ4;A0A8I7BCM2;F2CQV1;F2CVB4;F2CW03;F2DC91;F2DR63;F2DYM4;F2EDT9
GO:0034655	nucleobase-containing compound catabolic process	2	32	0.976537	0.993154	A0A8I6YF06;A0A8I7BBH0
GO:0006084	acetyl-CoA metabolic process	1	21	0.976755	0.993154	A0A8I6YFN2
GO:0006891	intra-Golgi vesicle-mediated transport	1	21	0.976755	0.993154	A0A8I6XLR3
GO:0009308	amine metabolic process	1	21	0.976755	0.993154	A0A8I6YTX6
GO:0043624	cellular protein complex disassembly	1	21	0.976755	0.993154	A0A8I6XEF6
GO:0044036	cell wall macromolecule metabolic process	1	21	0.976755	0.993154	A0A8I6YF87
GO:0032259	methylation	2	33	0.979881	0.994376	A0A8I6WB26;A0A8I6WNS5
GO:0006733	oxidoreduction coenzyme metabolic process	5	61	0.980205	0.994376	A0A3S9KBF3;A0A8I6XBW8;A0A8I7BCM2;F2CQV1;F2CW03
GO:0044767	single-organism developmental process	10	102	0.980376	0.994376	A0A287TWK6;A0A8I6WQV8;A0A8I6WXG8;A0A8I6Z1P9;A0A8I7B5R8;F2DZK3;F2E3M7;F2EKQ3;M0XNG3;Q673G6
GO:0006402	mRNA catabolic process	1	22	0.980583	0.994376	A0A8I6YF06
GO:1901361	organic cyclic compound catabolic process	4	53	0.982177	0.995325	A0A8I6YF06;A0A8I6YTX6;A0A8I7BBH0;F2DC91
GO:0000226	microtubule cytoskeleton organization	1	23	0.983783	0.995619	F2E2M2
GO:0042273	ribosomal large subunit biogenesis	1	23	0.983783	0.995619	F2E0C0
GO:0008610	lipid biosynthetic process	5	63	0.984485	0.995663	A0A5C1YV39;F2CPX3;F2DSZ9;F2DZK7;Q673G6
GO:0072524	pyridine-containing compound metabolic process	5	64	0.986283	0.995663	A0A3S9KBF3;A0A8I6XBW8;A0A8I7BCM2;F2CQV1;F2CW03
GO:0000096	sulfur amino acid metabolic process	1	24	0.986456	0.995663	A0A8I6YWJ4
GO:0006401	RNA catabolic process	1	24	0.986456	0.995663	A0A8I6YF06
GO:0006575	cellular modified amino acid metabolic process	5	65	0.987884	0.995777	A0A8I6XQX4;A0A8I6YTX6;A0A8I6YWJ4;F2DR63;F2DYM4
GO:1901615	organic hydroxy compound metabolic process	5	65	0.987884	0.995777	A0A8I6WT14;A0A8I6XQ26;F2DHZ5;F2DSA8;M0WQ79
GO:0007275	multicellular organism development	7	84	0.990062	0.997049	A0A8I6WQV8;A0A8I6WXG8;F2DZK3;F2E3M7;F2EKQ3;M0XNG3;Q673G6
GO:0006644	phospholipid metabolic process	1	26	0.990555	0.997049	F2CPX3
GO:0006732	coenzyme metabolic process	11	119	0.992053	0.997049	A0A3S9KBF3;A0A5C1YV39;A0A8I6XBW8;A0A8I6XQX4;A0A8I6YFN2;A0A8I6YWJ4;A0A8I7BCM2;F2CQV1;F2CW03;F2DR63;F2DYM4
GO:0007010	cytoskeleton organization	2	39	0.992122	0.997049	A0A8I6YKQ7;F2E2M2
GO:0006888	ER to Golgi vesicle-mediated transport	3	50	0.992717	0.997049	A0A8I6WMI1;A0A8I6X2Y8;F2E298
GO:0008380	RNA splicing	8	96	0.993349	0.997049	A0A8I6WFJ6;A0A8I6XEW3;A0A8I6XF02;A0A8I6XQQ9;A0A8I6Y6M4;F2D205;F2DE93;F2DP88
GO:0044707	single-multicellular organism process	7	88	0.993756	0.997049	A0A8I6WQV8;A0A8I6WXG8;F2DZK3;F2E3M7;F2EKQ3;M0XNG3;Q673G6
GO:0006397	mRNA processing	9	106	0.994436	0.99707	A0A8I6WFJ6;A0A8I6XEW3;A0A8I6XF02;A0A8I6XQQ9;A0A8I6Y6M4;F2D205;F2D6G3;F2DE93;F2DP88
GO:0016071	mRNA metabolic process	11	127	0.996555	0.998534	A0A8I6WFJ6;A0A8I6XEW3;A0A8I6XF02;A0A8I6XQQ9;A0A8I6Y6M4;A0A8I6YF06;F2D205;F2D6G3;F2DDD5;F2DE93;F2DP88
GO:0006790	sulfur compound metabolic process	6	95	0.999172	1	A0A5C1YV39;A0A8I6YFN2;A0A8I6YQI6;A0A8I6YWJ4;F2CVB4;F2EDT9
GO:0006066	alcohol metabolic process	1	44	0.999637	1	M0WQ79
GO:0008150	biological_process	420	2571	1	1	A0A0U2GJJ3;A0A0U2GJL1;A0A287EZS0;A0A287EZV5;A0A287FP91;A0A287FZ34;A0A287ILG2;A0A287LRJ1;A0A287NWK0;A0A287PY01;A0A287Q7U2;A0A287SCX5;A0A287TWK6;A0A287U5M5;A0A2P1AB13;A0A3S9KBF3;A0A5C1YV39;A0A8I6W6F0;A0A8I6WB19;A0A8I6WB26;A0A8I6WD99;A0A8I6WDS1;A0A8I6WF91;A0A8I6WFJ6;A0A8I6WGG3;A0A8I6WGX0;A0A8I6WH69;A0A8I6WHD1;A0A8I6WHE5;A0A8I6WHM6;A0A8I6WIA9;A0A8I6WIT4;A0A8I6WJN4;A0A8I6WKG3;A0A8I6WKM0;A0A8I6WMI1;A0A…
