# Supplementary material for: Muti-omics revealed the global response of Hordeum vulgare to different wavelength of UV exposure
Source: Research Square preprint supplement (doi:10.21203/rs.3.rs-5763885/v1), 2025-04-23
Supplement: Supplementary file 3 [file ca2cd1ac5767814ca45e801e.xlsx]

## Sheet: CK-UVA
Accession	Description	MEAN CK	MEAN UVA	P-VALUE	FOLD CHANGE	LOG1.5_FOLDCHANGE	GeneName
A0A023ZT67	>tr|A0A023ZT67|A0A023ZT67_HORVV Putative syntaxin-related protein OS=Hordeum vulgare subsp. vulgare OX=112509 PE=2 SV=1	1.19039	1.23182	0.932337	1.0348	0.0843766
A0A060ILL2	>tr|A0A060ILL2|A0A060ILL2_HORVS Limit dextrinase inhibitor (Fragment) OS=Hordeum vulgare subsp. spontaneum OX=77009 GN=LDI PE=3 SV=1	3.5821	3.06792	0.75516	0.856459	-0.38215	LDI
A0A067YHQ4	>tr|A0A067YHQ4|A0A067YHQ4_HORVS Dehydrin 9 (Fragment) OS=Hordeum vulgare subsp. spontaneum OX=77009 GN=dhn9 PE=4 SV=1	1.83066	1.23639	0.181928	0.675379	-0.96798	dhn9
A0A068F4L9	>tr|A0A068F4L9|A0A068F4L9_HORVU Chalcone-flavonone isomerase family protein OS=Hordeum vulgare OX=4513 GN=CHI PE=2 SV=1	2.41458	2.18261	0.460387	0.903928	-0.24911	CHI
A0A0D5CPA7	>tr|A0A0D5CPA7|A0A0D5CPA7_HORVV Putative cellulose synthase-like protein D2 OS=Hordeum vulgare subsp. vulgare OX=112509 GN=CslD2 PE=4 SV=1	0.752849	0.717183	0.843758	0.952625	-0.119699	CslD2
A0A0K0VKK1	>tr|A0A0K0VKK1|A0A0K0VKK1_HORVU CSP1 OS=Hordeum vulgare OX=4513 GN=CSP1 PE=2 SV=1	7.95228	5.16237	0.282305	0.649168	-1.0656	CSP1
A0A0K0YH42	>tr|A0A0K0YH42|A0A0K0YH42_HORVS NAD(P)H dehydrogenase subunit H OS=Hordeum vulgare subsp. spontaneum OX=77009 GN=nad7 PE=3 SV=1	0.759618	0.568452	0.21752	0.748339	-0.714978	nad7
A0A0N7IS25	>tr|A0A0N7IS25|A0A0N7IS25_HORVU Plasma membrane associated protein-4 OS=Hordeum vulgare OX=4513 GN=PM19-4 PE=4 SV=1	1.35965	0.974015	0.0254045	0.716372	-0.822651	PM19-4
A0A0S1LGH4	>tr|A0A0S1LGH4|A0A0S1LGH4_HORVS Dehydrin3 OS=Hordeum vulgare subsp. spontaneum OX=77009 GN=Dhn3 PE=3 SV=1	11.9342	13.063	0.799014	1.09459	0.2229	Dhn3
A0A0U2GJJ3	>tr|A0A0U2GJJ3|A0A0U2GJJ3_HORVU UDP-arabinopyranose mutase OS=Hordeum vulgare OX=4513 PE=2 SV=1	3.57509	4.22208	0.148052	1.18097	0.410238
A0A0U2GJL1	>tr|A0A0U2GJL1|A0A0U2GJL1_HORVU UDP-arabinopyranose mutase OS=Hordeum vulgare OX=4513 PE=2 SV=1	6.84505	6.85795	0.990237	1.00188	0.00464324
A0A0U2GJM5	>tr|A0A0U2GJM5|A0A0U2GJM5_HORVU UDP-arabinopyranose mutase OS=Hordeum vulgare OX=4513 PE=3 SV=1	1.80981	2.85902	0.129156	1.57974	1.12774
A0A0U2IGV8	>tr|A0A0U2IGV8|A0A0U2IGV8_HORVU Ribosomal protein S16 OS=Hordeum vulgare OX=4513 PE=2 SV=1	1.94902	2.14912	0.815764	1.10267	0.241039
A0A0U2KWW3	>tr|A0A0U2KWW3|A0A0U2KWW3_HORVU malate dehydrogenase OS=Hordeum vulgare OX=4513 GN=MDH PE=2 SV=1	4.8143	4.5928	0.578226	0.953992	-0.116163	MDH
A0A0U2L8B1	>tr|A0A0U2L8B1|A0A0U2L8B1_HORVU Eukaryotic elongation factor 1 gamma OS=Hordeum vulgare OX=4513 GN=eEF1G PE=2 SV=1	13.6064	13.3005	0.829829	0.977515	-0.056088	eEF1G
A0A0U2LJC8	>tr|A0A0U2LJC8|A0A0U2LJC8_HORVU Nucleoside diphosphate kinase OS=Hordeum vulgare OX=4513 GN=NDPK PE=2 SV=1	30.1284	32.4503	0.577542	1.07707	0.183098	NDPK
A0A0U2S9G2	>tr|A0A0U2S9G2|A0A0U2S9G2_HORVD Starch synthase, chloroplastic/amyloplastic OS=Hordeum vulgare var. distichon OX=1288821 PE=3 SV=1	3.13336	2.73918	0.552901	0.874197	-0.331594
A0A0U5AE65	>tr|A0A0U5AE65|A0A0U5AE65_HORVV Lipoxygenase OS=Hordeum vulgare subsp. vulgare OX=112509 GN=Lox-1 PE=3 SV=1	5.68584	5.48372	0.820438	0.964453	-0.0892659	Lox-1
A0A142I888	>tr|A0A142I888|A0A142I888_HORVU Superoxide dismutase [Cu-Zn] OS=Hordeum vulgare OX=4513 GN=CSD1 PE=2 SV=1	21.8076	18.7948	0.382658	0.861845	-0.366689	CSD1
A0A161G0W4	>tr|A0A161G0W4|A0A161G0W4_HORVU MCT-1 OS=Hordeum vulgare OX=4513 PE=2 SV=1	1.04197	1.3312	0.200629	1.27759	0.604177
A0A161G0Y0	>tr|A0A161G0Y0|A0A161G0Y0_HORVU Glycosyltransferases OS=Hordeum vulgare OX=4513 GN=GT43 PE=2 SV=1	1.80842	1.51828	0.670811	0.839563	-0.431292	GT43
A0A161G111	>tr|A0A161G111|A0A161G111_HORVU Protein disulfide isomerase like 5-1 OS=Hordeum vulgare OX=4513 GN=PDIL5-1 PE=2 SV=1	7.28029	8.534	0.367828	1.17221	0.391864	PDIL5-1
A0A172QFH3	>tr|A0A172QFH3|A0A172QFH3_HORVV Non-specific lipid-transfer protein OS=Hordeum vulgare subsp. vulgare OX=112509 GN=blt4.9 PE=2 SV=1	1.35498	0.863718	0.239956	0.637439	-1.11057	blt4.9
A0A191TDI3	>tr|A0A191TDI3|A0A191TDI3_HORVV ATP synthase subunit alpha OS=Hordeum vulgare subsp. vulgare OX=112509 GN=atp1 PE=3 SV=1	6.44164	5.75519	0.169319	0.893436	-0.277905	atp1
A0A191TDJ3	>tr|A0A191TDJ3|A0A191TDJ3_HORVV Cytochrome c oxidase subunit 2 OS=Hordeum vulgare subsp. vulgare OX=112509 GN=cox2 PE=3 SV=1	0.668365	0.594474	0.510381	0.889446	-0.288945	cox2
A0A191TDJ4	>tr|A0A191TDJ4|A0A191TDJ4_HORVV Cytochrome b OS=Hordeum vulgare subsp. vulgare OX=112509 GN=cob PE=3 SV=1	1.8212	1.81771	0.997673	0.998088	-0.00472039	cob
A0A191TDJ5	>tr|A0A191TDJ5|A0A191TDJ5_HORVV Cytochrome c oxidase subunit 1 OS=Hordeum vulgare subsp. vulgare OX=112509 GN=cox1 PE=3 SV=1	0.641604	0.844515	0.0755939	1.31626	0.677718	cox1
A0A191TDL0	>tr|A0A191TDL0|A0A191TDL0_HORVV NADH-ubiquinone oxidoreductase chain 4 OS=Hordeum vulgare subsp. vulgare OX=112509 GN=nad4 PE=3 SV=1	0.503728	0.54217	0.208094	1.07631	0.181376	nad4
A0A1C9ZNW3	>tr|A0A1C9ZNW3|A0A1C9ZNW3_HORVS H(+)-transporting two-sector ATPase OS=Hordeum vulgare subsp. spontaneum OX=77009 GN=atp8 PE=3 SV=1	0.615318	0.539795	0.711912	0.877262	-0.322961	atp8
A0A1C9ZNZ0	>tr|A0A1C9ZNZ0|A0A1C9ZNZ0_HORVS NADH dehydrogenase subunit 9 OS=Hordeum vulgare subsp. spontaneum OX=77009 GN=nad9_1 PE=3 SV=1	1.07366	0.860112	0.633317	0.801107	-0.546931	nad9_1
A0A1C9ZQ60	>tr|A0A1C9ZQ60|A0A1C9ZQ60_HORVV NADH dehydrogenase subunit 2 OS=Hordeum vulgare subsp. vulgare OX=112509 GN=nad2 PE=3 SV=1	0.778534	0.786121	0.859753	1.00975	0.0239193	nad2
A0A1C9ZW47	>tr|A0A1C9ZW47|A0A1C9ZW47_HORVV NADH-ubiquinone oxidoreductase chain 5 OS=Hordeum vulgare subsp. vulgare OX=112509 GN=nad5 PE=3 SV=1	0.695206	0.639038	0.346764	0.919206	-0.207773	nad5
A0A1M4LV24	>tr|A0A1M4LV24|A0A1M4LV24_HORVU Acetolactate synthase OS=Hordeum vulgare OX=4513 GN=ALS PE=3 SV=1	1.20621	1.30868	0.545587	1.08495	0.201094	ALS
A0A1Q1NP08	>tr|A0A1Q1NP08|A0A1Q1NP08_HORVU MIR1 OS=Hordeum vulgare OX=4513 PE=2 SV=1	0.739368	0.4346	0.0603555	0.5878	-1.31052
A0A218LN67	>tr|A0A218LN67|A0A218LN67_HORVU ATP synthase subunit beta, chloroplastic OS=Hordeum vulgare OX=4513 GN=atpB PE=3 SV=1	2.73682	3.23881	0.104648	1.18342	0.415344	atpB
A0A218LNB6	>tr|A0A218LNB6|A0A218LNB6_HORVU Cytochrome b559 subunit alpha OS=Hordeum vulgare OX=4513 GN=psbE PE=3 SV=1	0.435804	0.360083	0.553922	0.826251	-0.470712	psbE
A0A218LNH3	>tr|A0A218LNH3|A0A218LNH3_HORVU ATP synthase subunit alpha, chloroplastic OS=Hordeum vulgare OX=4513 GN=atpA PE=3 SV=1	0.760086	0.731285	0.72348	0.962108	-0.0952688	atpA
A0A287DTW3	>tr|A0A287DTW3|A0A287DTW3_HORVV Bowman-Birk serine protease inhibitors family domain-containing protein OS=Hordeum vulgare subsp. vulgare OX=112509 PE=4 SV=1	1.18895	0.912355	0.243938	0.76736	-0.653075
A0A287E1P6	>tr|A0A287E1P6|A0A287E1P6_HORVV Pectinesterase inhibitor domain-containing protein OS=Hordeum vulgare subsp. vulgare OX=112509 PE=3 SV=1	0.665075	0.639545	0.900473	0.961614	-0.0965375
A0A287EBT3	>tr|A0A287EBT3|A0A287EBT3_HORVV Bifunctional inhibitor/plant lipid transfer protein/seed storage helical domain-containing protein OS=Hordeum vulgare subsp. vulgare OX=112509 PE=4 SV=1	1.10967	0.846492	0.253878	0.762831	-0.667675
A0A287ESQ2	>tr|A0A287ESQ2|A0A287ESQ2_HORVV alanine transaminase OS=Hordeum vulgare subsp. vulgare OX=112509 PE=3 SV=1	12.0826	12.0828	0.999925	1.00001	3.09691e-05
A0A287EZQ9	>tr|A0A287EZQ9|A0A287EZQ9_HORVV Uncharacterized protein OS=Hordeum vulgare subsp. vulgare OX=112509 PE=4 SV=1	3.33103	3.02454	0.406167	0.907991	-0.238049
A0A287EZS0	>tr|A0A287EZS0|A0A287EZS0_HORVV FACT complex subunit SSRP1 OS=Hordeum vulgare subsp. vulgare OX=112509 PE=3 SV=1	0.619154	0.54344	0.332898	0.877713	-0.321694
A0A287EZV5	>tr|A0A287EZV5|A0A287EZV5_HORVV Uncharacterized protein OS=Hordeum vulgare subsp. vulgare OX=112509 PE=4 SV=1	0.783341	0.609254	0.0392444	0.777764	-0.61986
A0A287F096	>tr|A0A287F096|A0A287F096_HORVV Malic enzyme OS=Hordeum vulgare subsp. vulgare OX=112509 PE=3 SV=1	1.09031	1.35433	0.0541067	1.24215	0.534799
A0A287F1N0	>tr|A0A287F1N0|A0A287F1N0_HORVV Uncharacterized protein OS=Hordeum vulgare subsp. vulgare OX=112509 PE=3 SV=1	2.15107	1.69911	0.101042	0.78989	-0.581706
A0A287F3A8	>tr|A0A287F3A8|A0A287F3A8_HORVV RAB6-interacting golgin OS=Hordeum vulgare subsp. vulgare OX=112509 PE=4 SV=1	0.387211	0.377217	0.921243	0.974188	-0.0644958
A0A287F8M8	>tr|A0A287F8M8|A0A287F8M8_HORVV UDP-glucose:glycoprotein glucosyltransferase OS=Hordeum vulgare subsp. vulgare OX=112509 PE=3 SV=1	1.33735	0.717359	0.207628	0.536405	-1.53617
A0A287F8R5	>tr|A0A287F8R5|A0A287F8R5_HORVV phosphoribosylformylglycinamidine synthase OS=Hordeum vulgare subsp. vulgare OX=112509 PE=3 SV=1	0.671989	0.704829	0.822225	1.04887	0.117677
A0A287FFP0	>tr|A0A287FFP0|A0A287FFP0_HORVV Methionine aminopeptidase OS=Hordeum vulgare subsp. vulgare OX=112509 PE=3 SV=1	1.39944	1.51985	0.337848	1.08605	0.203576
A0A287FP91	>tr|A0A287FP91|A0A287FP91_HORVV Protein kinase domain-containing protein OS=Hordeum vulgare subsp. vulgare OX=112509 PE=3 SV=1	1.01313	0.889834	0.245613	0.878305	-0.320032
A0A287FZ34	>tr|A0A287FZ34|A0A287FZ34_HORVV Guanosine nucleotide diphosphate dissociation inhibitor OS=Hordeum vulgare subsp. vulgare OX=112509 PE=3 SV=1	0.892996	1.15934	0.483583	1.29825	0.643756
A0A287G8M3	>tr|A0A287G8M3|A0A287G8M3_HORVV fructose-bisphosphatase OS=Hordeum vulgare subsp. vulgare OX=112509 PE=3 SV=1	1.06353	1.30392	0.701007	1.22603	0.502582
A0A287GAZ3	>tr|A0A287GAZ3|A0A287GAZ3_HORVV alpha,alpha-trehalose-phosphate synthase (UDP-forming) OS=Hordeum vulgare subsp. vulgare OX=112509 PE=3 SV=1	1.16437	1.31028	0.408039	1.12531	0.291175
A0A287GCI3	>tr|A0A287GCI3|A0A287GCI3_HORVV Uncharacterized protein OS=Hordeum vulgare subsp. vulgare OX=112509 PE=3 SV=1	1.46586	1.48591	0.981834	1.01367	0.0334966
A0A287GME4	>tr|A0A287GME4|A0A287GME4_HORVV CobW/HypB/UreG nucleotide-binding domain-containing protein OS=Hordeum vulgare subsp. vulgare OX=112509 PE=3 SV=1	1.92208	1.88027	0.819671	0.978243	-0.0542511
A0A287GN26	>tr|A0A287GN26|A0A287GN26_HORVV Aspartic proteinase OS=Hordeum vulgare subsp. vulgare OX=112509 PE=3 SV=1	6.61562	6.2489	0.552706	0.944568	-0.140648
A0A287GQ58	>tr|A0A287GQ58|A0A287GQ58_HORVV Uncharacterized protein OS=Hordeum vulgare subsp. vulgare OX=112509 PE=4 SV=1	0.735961	0.80777	0.486624	1.09757	0.229612
A0A287GWD4	>tr|A0A287GWD4|A0A287GWD4_HORVV VHS domain-containing protein OS=Hordeum vulgare subsp. vulgare OX=112509 PE=3 SV=1	0.616953	1.09439	0.436793	1.77386	1.41359
A0A287GWL8	>tr|A0A287GWL8|A0A287GWL8_HORVV Laccase OS=Hordeum vulgare subsp. vulgare OX=112509 GN=HvLAC1 PE=2 SV=1	0.708495	0.61186	0.147192	0.863605	-0.361657	HvLAC1
A0A287GYL8	>tr|A0A287GYL8|A0A287GYL8_HORVV Uncharacterized protein OS=Hordeum vulgare subsp. vulgare OX=112509 PE=3 SV=1	1.62615	1.5958	0.817543	0.981336	-0.046466
A0A287H6P9	>tr|A0A287H6P9|A0A287H6P9_HORVV Uncharacterized protein OS=Hordeum vulgare subsp. vulgare OX=112509 PE=3 SV=1	1.3009	1.29841	0.994492	0.998081	-0.00473852
A0A287HHI1	>tr|A0A287HHI1|A0A287HHI1_HORVV Uncharacterized protein OS=Hordeum vulgare subsp. vulgare OX=112509 PE=4 SV=1	0.675231	0.580686	0.368302	0.859982	-0.372027
A0A287HLW9	>tr|A0A287HLW9|A0A287HLW9_HORVV Probable 6-phosphogluconolactonase OS=Hordeum vulgare subsp. vulgare OX=112509 PE=3 SV=1	0.337426	0.378466	0.822997	1.12163	0.283083
A0A287HPN8	>tr|A0A287HPN8|A0A287HPN8_HORVV Proteasome subunit alpha type OS=Hordeum vulgare subsp. vulgare OX=112509 PE=3 SV=1	3.6613	3.98103	0.616018	1.08733	0.206483
A0A287HVV0	>tr|A0A287HVV0|A0A287HVV0_HORVV Essential protein Yae1 N-terminal domain-containing protein OS=Hordeum vulgare subsp. vulgare OX=112509 PE=4 SV=1	0.593557	0.249004	0.145074	0.419511	-2.14239
A0A287I2U0	>tr|A0A287I2U0|A0A287I2U0_HORVV Uncharacterized protein OS=Hordeum vulgare subsp. vulgare OX=112509 PE=4 SV=1	3.05267	0.676661	0.0875812	0.221662	-3.71574
A0A287ILG2	>tr|A0A287ILG2|A0A287ILG2_HORVV Aldose 1-epimerase OS=Hordeum vulgare subsp. vulgare OX=112509 PE=3 SV=1	0.60192	0.562003	0.649426	0.933684	-0.16923
A0A287IVR5	>tr|A0A287IVR5|A0A287IVR5_HORVV Peptidase M28 domain-containing protein OS=Hordeum vulgare subsp. vulgare OX=112509 PE=4 SV=1	1.10027	0.93006	0.453133	0.845299	-0.4145
A0A287IX56	>tr|A0A287IX56|A0A287IX56_HORVV Uncharacterized protein OS=Hordeum vulgare subsp. vulgare OX=112509 PE=4 SV=1	1.57682	1.28181	0.265288	0.81291	-0.510856
A0A287J334	>tr|A0A287J334|A0A287J334_HORVV Aspartate/glutamate/uridylate kinase domain-containing protein OS=Hordeum vulgare subsp. vulgare OX=112509 PE=3 SV=2	0.562319	0.416127	0.532159	0.740019	-0.742552
A0A287JEP8	>tr|A0A287JEP8|A0A287JEP8_HORVV Protein RCC2 homolog OS=Hordeum vulgare subsp. vulgare OX=112509 PE=4 SV=1	0.897109	1.01227	0.645872	1.12837	0.297874
A0A287JR75	>tr|A0A287JR75|A0A287JR75_HORVV SART-1 family protein OS=Hordeum vulgare subsp. vulgare OX=112509 PE=3 SV=1	0.821835	0.420682	0.107255	0.511881	-1.65159
A0A287JSA9	>tr|A0A287JSA9|A0A287JSA9_HORVV Pre-mRNA cleavage factor Im 25 kDa subunit OS=Hordeum vulgare subsp. vulgare OX=112509 PE=3 SV=1	0.542256	0.456887	0.624703	0.842568	-0.422481
A0A287JZL7	>tr|A0A287JZL7|A0A287JZL7_HORVV Uncharacterized protein OS=Hordeum vulgare subsp. vulgare OX=112509 PE=4 SV=1	0.420206	0.430511	0.906361	1.02452	0.0597519
A0A287K5X8	>tr|A0A287K5X8|A0A287K5X8_HORVV Asparagine synthetase [glutamine-hydrolyzing] OS=Hordeum vulgare subsp. vulgare OX=112509 PE=4 SV=1	1.3848	0.691499	0.0474191	0.49935	-1.71272
A0A287KKH0	>tr|A0A287KKH0|A0A287KKH0_HORVV Peptide-N4-(N-acetyl-beta-glucosaminyl)asparagine amidase A OS=Hordeum vulgare subsp. vulgare OX=112509 PE=4 SV=1	0.670174	0.63526	0.352446	0.947904	-0.131953
A0A287KP21	>tr|A0A287KP21|A0A287KP21_HORVV leucine--tRNA ligase OS=Hordeum vulgare subsp. vulgare OX=112509 PE=3 SV=1	0.617027	0.523354	0.651852	0.848186	-0.40609
A0A287KQT4	>tr|A0A287KQT4|A0A287KQT4_HORVV Importin subunit alpha OS=Hordeum vulgare subsp. vulgare OX=112509 PE=3 SV=1	2.40926	1.68016	0.408835	0.697377	-0.888927
A0A287KUB8	>tr|A0A287KUB8|A0A287KUB8_HORVV Uncharacterized protein OS=Hordeum vulgare subsp. vulgare OX=112509 PE=3 SV=1	0.588554	0.564437	0.616091	0.959023	-0.103191
A0A287KUR3	>tr|A0A287KUR3|A0A287KUR3_HORVV ATP citrate synthase OS=Hordeum vulgare subsp. vulgare OX=112509 PE=4 SV=1	1.03063	1.01874	0.953119	0.988465	-0.0286149
A0A287KXN1	>tr|A0A287KXN1|A0A287KXN1_HORVV shikimate dehydrogenase (NADP(+)) OS=Hordeum vulgare subsp. vulgare OX=112509 PE=3 SV=1	0.74207	0.522166	0.314455	0.703661	-0.866803
A0A287KZI2	>tr|A0A287KZI2|A0A287KZI2_HORVV Ubiquitin carboxyl-terminal hydrolase OS=Hordeum vulgare subsp. vulgare OX=112509 PE=3 SV=1	1.66828	1.76136	0.847331	1.05579	0.133896
A0A287KZV7	>tr|A0A287KZV7|A0A287KZV7_HORVV Developmentally-regulated G-protein 2 OS=Hordeum vulgare subsp. vulgare OX=112509 PE=4 SV=1	0.802809	0.839865	0.80652	1.04616	0.111291
A0A287L3J7	>tr|A0A287L3J7|A0A287L3J7_HORVV Uncharacterized protein OS=Hordeum vulgare subsp. vulgare OX=112509 PE=4 SV=1	2.117	1.50867	0.221376	0.712643	-0.835522
A0A287L5I7	>tr|A0A287L5I7|A0A287L5I7_HORVV Carbonic anhydrase OS=Hordeum vulgare subsp. vulgare OX=112509 PE=3 SV=1	3.80638	3.92445	0.838626	1.03102	0.0753403
A0A287L8A3	>tr|A0A287L8A3|A0A287L8A3_HORVV NAB domain-containing protein OS=Hordeum vulgare subsp. vulgare OX=112509 PE=4 SV=1	1.9566	1.55497	0.126007	0.794727	-0.566651
A0A287L8C4	>tr|A0A287L8C4|A0A287L8C4_HORVV Vacuolar protein sorting-associated protein 25 OS=Hordeum vulgare subsp. vulgare OX=112509 PE=3 SV=1	0.666516	0.668891	0.978045	1.00356	0.00877333
A0A287LGA7	>tr|A0A287LGA7|A0A287LGA7_HORVV KRR1 small subunit processome component OS=Hordeum vulgare subsp. vulgare OX=112509 PE=3 SV=1	0.614596	0.55902	0.405866	0.909572	-0.233758
A0A287LNA3	>tr|A0A287LNA3|A0A287LNA3_HORVV Uncharacterized protein OS=Hordeum vulgare subsp. vulgare OX=112509 PE=4 SV=1	0.553708	0.526616	0.791204	0.951071	-0.123726
A0A287LRJ1	>tr|A0A287LRJ1|A0A287LRJ1_HORVV Secretory carrier-associated membrane protein OS=Hordeum vulgare subsp. vulgare OX=112509 PE=3 SV=1	0.510461	0.452062	0.591232	0.885595	-0.299644
A0A287LTS8	>tr|A0A287LTS8|A0A287LTS8_HORVV Glycosyltransferase OS=Hordeum vulgare subsp. vulgare OX=112509 PE=3 SV=1	0.740702	0.683619	0.52143	0.922934	-0.197791
A0A287LWH7	>tr|A0A287LWH7|A0A287LWH7_HORVV UBC core domain-containing protein OS=Hordeum vulgare subsp. vulgare OX=112509 PE=3 SV=1	1.00464	1.48786	0.296747	1.48099	0.968547
A0A287ME54	>tr|A0A287ME54|A0A287ME54_HORVV Uncharacterized protein OS=Hordeum vulgare subsp. vulgare OX=112509 PE=3 SV=1	2.232	1.73296	0.338277	0.776418	-0.624133
A0A287MFX0	>tr|A0A287MFX0|A0A287MFX0_HORVV 2-hydroxyacyl-CoA lyase OS=Hordeum vulgare subsp. vulgare OX=112509 PE=3 SV=1	0.456145	0.696008	0.10799	1.52585	1.04214
A0A287MHI9	>tr|A0A287MHI9|A0A287MHI9_HORVV hydroxyethylthiazole kinase OS=Hordeum vulgare subsp. vulgare OX=112509 PE=3 SV=1	0.781542	0.829791	0.651681	1.06174	0.147745
A0A287MKB2	>tr|A0A287MKB2|A0A287MKB2_HORVV Uncharacterized protein OS=Hordeum vulgare subsp. vulgare OX=112509 PE=3 SV=1	3.54964	3.30751	0.801268	0.93179	-0.17424
A0A287MLU2	>tr|A0A287MLU2|A0A287MLU2_HORVV Uncharacterized protein OS=Hordeum vulgare subsp. vulgare OX=112509 PE=3 SV=1	4.80948	2.01722	0.0449632	0.419427	-2.14289
A0A287MPL4	>tr|A0A287MPL4|A0A287MPL4_HORVV Splicing factor 3A subunit 1 OS=Hordeum vulgare subsp. vulgare OX=112509 PE=4 SV=1	2.01309	2.30774	0.576376	1.14637	0.336894
A0A287MTZ7	>tr|A0A287MTZ7|A0A287MTZ7_HORVV Uncharacterized protein OS=Hordeum vulgare subsp. vulgare OX=112509 PE=4 SV=1	0.814471	0.576982	0.125042	0.708413	-0.850206
A0A287NB21	>tr|A0A287NB21|A0A287NB21_HORVV ER membrane protein complex subunit 10 OS=Hordeum vulgare subsp. vulgare OX=112509 PE=3 SV=1	0.729229	0.714913	0.915064	0.980369	-0.0488988
A0A287NQU3	>tr|A0A287NQU3|A0A287NQU3_HORVV Peptidyl-prolyl cis-trans isomerase OS=Hordeum vulgare subsp. vulgare OX=112509 PE=3 SV=1	0.701929	0.685682	0.895796	0.976854	-0.0577572
A0A287NTR5	>tr|A0A287NTR5|A0A287NTR5_HORVV Transmembrane protein 87B OS=Hordeum vulgare subsp. vulgare OX=112509 PE=3 SV=1	0.904498	0.83923	0.183754	0.92784	-0.184716
A0A287NWK0	>tr|A0A287NWK0|A0A287NWK0_HORVV Target of Myb protein 1 OS=Hordeum vulgare subsp. vulgare OX=112509 PE=3 SV=1	2.17785	1.74653	0.12626	0.801952	-0.544329
A0A287NZS5	>tr|A0A287NZS5|A0A287NZS5_HORVV EGF-like calcium-binding domain-containing protein OS=Hordeum vulgare subsp. vulgare OX=112509 PE=3 SV=1	1.19421	1.21737	0.977629	1.0194	0.0473849
A0A287P008	>tr|A0A287P008|A0A287P008_HORVV Uncharacterized protein OS=Hordeum vulgare subsp. vulgare OX=112509 PE=4 SV=1	1.06211	0.445731	0.0482696	0.419666	-2.14148
A0A287PBT6	>tr|A0A287PBT6|A0A287PBT6_HORVV Uncharacterized protein OS=Hordeum vulgare subsp. vulgare OX=112509 PE=4 SV=1	0.855905	0.76236	0.402396	0.890706	-0.285452
A0A287PLP7	>tr|A0A287PLP7|A0A287PLP7_HORVV RRM domain-containing protein OS=Hordeum vulgare subsp. vulgare OX=112509 PE=4 SV=1	0.657703	0.510435	0.393848	0.776087	-0.625185
A0A287PU65	>tr|A0A287PU65|A0A287PU65_HORVV Methyltransferase OS=Hordeum vulgare subsp. vulgare OX=112509 PE=3 SV=1	0.518889	0.433735	0.487427	0.835892	-0.442099
A0A287PUS9	>tr|A0A287PUS9|A0A287PUS9_HORVV Membrane-bound NADPH oxidase OS=Hordeum vulgare subsp. vulgare OX=112509 GN=RBOHI3 PE=2 SV=1	0.506222	0.532627	0.797001	1.05216	0.1254	RBOHI3
A0A287PVY6	>tr|A0A287PVY6|A0A287PVY6_HORVV Calcium-dependent protein kinase OS=Hordeum vulgare subsp. vulgare OX=112509 PE=4 SV=1	0.51694	0.829398	0.312174	1.60444	1.166
A0A287PY01	>tr|A0A287PY01|A0A287PY01_HORVV Peroxidase OS=Hordeum vulgare subsp. vulgare OX=112509 PE=3 SV=1	1.30652	1.22699	0.647906	0.939133	-0.15488
A0A287Q7U2	>tr|A0A287Q7U2|A0A287Q7U2_HORVV Uncharacterized protein OS=Hordeum vulgare subsp. vulgare OX=112509 PE=3 SV=1	1.46829	4.75398	0.0430011	3.23776	2.89762
A0A287QE55	>tr|A0A287QE55|A0A287QE55_HORVV Uncharacterized protein OS=Hordeum vulgare subsp. vulgare OX=112509 PE=4 SV=1	1.14899	1.11795	0.901916	0.972981	-0.0675531
A0A287QL44	>tr|A0A287QL44|A0A287QL44_HORVV Uncharacterized protein OS=Hordeum vulgare subsp. vulgare OX=112509 PE=4 SV=1	0.63587	1.24653	0.197895	1.96036	1.66013
A0A287QRJ0	>tr|A0A287QRJ0|A0A287QRJ0_HORVV DM2 domain-containing protein OS=Hordeum vulgare subsp. vulgare OX=112509 PE=4 SV=1	0.429331	1.06501	0.301264	2.48063	2.24067
A0A287QXJ4	>tr|A0A287QXJ4|A0A287QXJ4_HORVV Long-chain-fatty-acid--CoA ligase OS=Hordeum vulgare subsp. vulgare OX=112509 PE=3 SV=1	0.857569	1.09448	0.0578921	1.27626	0.601607
A0A287R7V7	>tr|A0A287R7V7|A0A287R7V7_HORVV 4-coumarate--CoA ligase OS=Hordeum vulgare subsp. vulgare OX=112509 PE=3 SV=1	1.49359	1.42319	0.916176	0.95287	-0.119066
A0A287R8A5	>tr|A0A287R8A5|A0A287R8A5_HORVV GPI inositol-deacylase OS=Hordeum vulgare subsp. vulgare OX=112509 PE=3 SV=1	0.704187	0.710155	0.966834	1.00848	0.0208143
A0A287RBN4	>tr|A0A287RBN4|A0A287RBN4_HORVV Methyltransferase domain-containing protein OS=Hordeum vulgare subsp. vulgare OX=112509 PE=4 SV=1	0.632351	0.558426	0.545091	0.883095	-0.306617
A0A287REW1	>tr|A0A287REW1|A0A287REW1_HORVV Annexin OS=Hordeum vulgare subsp. vulgare OX=112509 PE=3 SV=1	0.710606	0.823013	0.346216	1.15818	0.362187
A0A287RYX5	>tr|A0A287RYX5|A0A287RYX5_HORVV alpha-L-fucosidase OS=Hordeum vulgare subsp. vulgare OX=112509 PE=3 SV=1	0.728	0.725726	0.982646	0.996877	-0.0077155
A0A287S2W4	>tr|A0A287S2W4|A0A287S2W4_HORVV Uncharacterized protein OS=Hordeum vulgare subsp. vulgare OX=112509 PE=3 SV=1	0.862149	0.866133	0.989671	1.00462	0.0113719
A0A287S3I9	>tr|A0A287S3I9|A0A287S3I9_HORVV Protein CWC15 homolog OS=Hordeum vulgare subsp. vulgare OX=112509 PE=3 SV=1	5.27678	2.87685	0.300618	0.54519	-1.49611
A0A287S6A6	>tr|A0A287S6A6|A0A287S6A6_HORVV E2 ubiquitin-conjugating enzyme OS=Hordeum vulgare subsp. vulgare OX=112509 PE=3 SV=1	0.513776	0.373588	0.270632	0.727142	-0.785848
A0A287SCX5	>tr|A0A287SCX5|A0A287SCX5_HORVV Strictosidine synthase conserved region domain-containing protein OS=Hordeum vulgare subsp. vulgare OX=112509 PE=3 SV=1	0.724807	0.651514	0.245073	0.89888	-0.262923
A0A287SNR6	>tr|A0A287SNR6|A0A287SNR6_HORVV RNA helicase OS=Hordeum vulgare subsp. vulgare OX=112509 PE=4 SV=1	3.42692	4.79035	0.397158	1.39786	0.826065
A0A287SUL6	>tr|A0A287SUL6|A0A287SUL6_HORVV AB hydrolase-1 domain-containing protein OS=Hordeum vulgare subsp. vulgare OX=112509 PE=4 SV=1	1.66003	1.38773	0.400276	0.835968	-0.441875
A0A287SWD7	>tr|A0A287SWD7|A0A287SWD7_HORVV Uncharacterized protein OS=Hordeum vulgare subsp. vulgare OX=112509 PE=4 SV=1	0.485812	0.493334	0.973859	1.01549	0.0378987
A0A287SXI8	>tr|A0A287SXI8|A0A287SXI8_HORVV histidine kinase OS=Hordeum vulgare subsp. vulgare OX=112509 PE=3 SV=1	6.22048	5.61035	0.427074	0.901915	-0.254609
A0A287T3E6	>tr|A0A287T3E6|A0A287T3E6_HORVV Uncharacterized protein OS=Hordeum vulgare subsp. vulgare OX=112509 PE=3 SV=1	1.7222	1.65488	0.563883	0.960912	-0.0983386
A0A287T864	>tr|A0A287T864|A0A287T864_HORVV RRM domain-containing protein OS=Hordeum vulgare subsp. vulgare OX=112509 PE=4 SV=1	1.04949	1.70259	0.31638	1.62231	1.19332
A0A287T8A1	>tr|A0A287T8A1|A0A287T8A1_HORVV Histone H2A OS=Hordeum vulgare subsp. vulgare OX=112509 PE=3 SV=1	4.26657	3.7435	0.708732	0.877404	-0.322563
A0A287T8X2	>tr|A0A287T8X2|A0A287T8X2_HORVV Catalase OS=Hordeum vulgare subsp. vulgare OX=112509 PE=3 SV=1	6.03847	5.51352	0.668838	0.913066	-0.224303
A0A287TTV1	>tr|A0A287TTV1|A0A287TTV1_HORVV Inositol-1-monophosphatase OS=Hordeum vulgare subsp. vulgare OX=112509 PE=3 SV=1	0.460163	0.206516	0.00254146	0.448787	-1.97602
A0A287TWK6	>tr|A0A287TWK6|A0A287TWK6_HORVV Protein FLX-like 2 OS=Hordeum vulgare subsp. vulgare OX=112509 PE=3 SV=1	2.48115	2.92797	0.342078	1.18009	0.408393
A0A287U3J5	>tr|A0A287U3J5|A0A287U3J5_HORVV Isopropylmalate dehydrogenase-like domain-containing protein OS=Hordeum vulgare subsp. vulgare OX=112509 PE=3 SV=1	3.06627	2.25531	0.53801	0.735522	-0.757586
A0A287U5M5	>tr|A0A287U5M5|A0A287U5M5_HORVV Uncharacterized protein OS=Hordeum vulgare subsp. vulgare OX=112509 PE=3 SV=1	2.05874	1.47216	0.340896	0.715077	-0.827112
A0A287U993	>tr|A0A287U993|A0A287U993_HORVV Pentacotripeptide-repeat region of PRORP domain-containing protein OS=Hordeum vulgare subsp. vulgare OX=112509 PE=4 SV=1	1.0939	0.873696	0.65462	0.798698	-0.554356
A0A287UER4	>tr|A0A287UER4|A0A287UER4_HORVV Sec20 OS=Hordeum vulgare subsp. vulgare OX=112509 PE=3 SV=1	0.624855	1.32148	0.213806	2.11486	1.84724
A0A287UKD2	>tr|A0A287UKD2|A0A287UKD2_HORVV Protein CROWDED NUCLEI 1 OS=Hordeum vulgare subsp. vulgare OX=112509 PE=3 SV=1	5.44755	3.8738	0.354732	0.71111	-0.840833
A0A287ULF4	>tr|A0A287ULF4|A0A287ULF4_HORVV Non-haem dioxygenase N-terminal domain-containing protein OS=Hordeum vulgare subsp. vulgare OX=112509 PE=4 SV=1	1.98198	1.47066	0.182009	0.742014	-0.735915
A0A287UQV6	>tr|A0A287UQV6|A0A287UQV6_HORVV Uncharacterized protein OS=Hordeum vulgare subsp. vulgare OX=112509 PE=4 SV=1	4.93722	2.04384	0.18519	0.413965	-2.17521
A0A287V821	>tr|A0A287V821|A0A287V821_HORVV Acyl-CoA-binding domain-containing protein 4 OS=Hordeum vulgare subsp. vulgare OX=112509 PE=4 SV=1	0.443215	0.534964	0.514674	1.20701	0.464021
A0A287VK78	>tr|A0A287VK78|A0A287VK78_HORVV phosphopyruvate hydratase OS=Hordeum vulgare subsp. vulgare OX=112509 PE=3 SV=1	2.81586	2.52781	0.287691	0.897706	-0.266146
A0A287VMP5	>tr|A0A287VMP5|A0A287VMP5_HORVV GDSL esterase/lipase OS=Hordeum vulgare subsp. vulgare OX=112509 PE=3 SV=1	0.571113	1.06004	0.0482354	1.85609	1.52534
A0A287VNY5	>tr|A0A287VNY5|A0A287VNY5_HORVV Gamma carbonic anhydrase OS=Hordeum vulgare subsp. vulgare OX=112509 PE=3 SV=1	0.581805	0.857764	0.265927	1.47432	0.957405
A0A287VZP8	>tr|A0A287VZP8|A0A287VZP8_HORVV UMP-CMP kinase OS=Hordeum vulgare subsp. vulgare OX=112509 PE=3 SV=1	0.554449	0.464726	0.485876	0.838176	-0.435369
A0A287W396	>tr|A0A287W396|A0A287W396_HORVV DCD domain-containing protein OS=Hordeum vulgare subsp. vulgare OX=112509 PE=4 SV=1	0.638301	0.624853	0.929659	0.978932	-0.0525152
A0A287W9B1	>tr|A0A287W9B1|A0A287W9B1_HORVV Transcription factor CBF/NF-Y/archaeal histone domain-containing protein OS=Hordeum vulgare subsp. vulgare OX=112509 PE=3 SV=1	0.421476	0.450268	0.806048	1.06831	0.162974
A0A287WH27	>tr|A0A287WH27|A0A287WH27_HORVV RanBP2-type domain-containing protein OS=Hordeum vulgare subsp. vulgare OX=112509 PE=4 SV=1	0.808754	0.680188	0.366737	0.841033	-0.426978
A0A287WL21	>tr|A0A287WL21|A0A287WL21_HORVV Uncharacterized protein OS=Hordeum vulgare subsp. vulgare OX=112509 PE=4 SV=1	6.82441	1.94804	0.413322	0.285452	-3.09196
A0A287WL23	>tr|A0A287WL23|A0A287WL23_HORVV Methionine aminopeptidase 2 OS=Hordeum vulgare subsp. vulgare OX=112509 PE=3 SV=1	1.12288	1.26319	0.284361	1.12496	0.290394
A0A287WRE2	>tr|A0A287WRE2|A0A287WRE2_HORVV CTLH domain-containing protein OS=Hordeum vulgare subsp. vulgare OX=112509 PE=4 SV=1	0.839551	0.639881	0.285512	0.762171	-0.66981
A0A287WTB9	>tr|A0A287WTB9|A0A287WTB9_HORVV Myb-like domain-containing protein OS=Hordeum vulgare subsp. vulgare OX=112509 PE=4 SV=1	0.939244	0.544292	0.0818281	0.579501	-1.34559
A0A287WWM4	>tr|A0A287WWM4|A0A287WWM4_HORVV J domain-containing protein OS=Hordeum vulgare subsp. vulgare OX=112509 PE=4 SV=1	0.558051	0.534493	0.649767	0.957784	-0.10638
A0A287WY76	>tr|A0A287WY76|A0A287WY76_HORVV RRM domain-containing protein OS=Hordeum vulgare subsp. vulgare OX=112509 PE=4 SV=1	0.592584	0.570462	0.933365	0.962669	-0.0938321
A0A287X4M9	>tr|A0A287X4M9|A0A287X4M9_HORVV Acyl-coenzyme A oxidase OS=Hordeum vulgare subsp. vulgare OX=112509 PE=3 SV=1	1.99847	1.83106	0.730609	0.91623	-0.215773
A0A287XD56	>tr|A0A287XD56|A0A287XD56_HORVV NAD-dependent epimerase/dehydratase domain-containing protein OS=Hordeum vulgare subsp. vulgare OX=112509 PE=4 SV=1	0.596784	0.256606	0.174451	0.429981	-2.08159
A0A287XP46	>tr|A0A287XP46|A0A287XP46_HORVV Uncharacterized protein OS=Hordeum vulgare subsp. vulgare OX=112509 PE=4 SV=1	9.768	10.5353	0.678151	1.07856	0.186508
A0A287XXH1	>tr|A0A287XXH1|A0A287XXH1_HORVV Uncharacterized protein OS=Hordeum vulgare subsp. vulgare OX=112509 PE=4 SV=1	0.56115	0.54032	0.668131	0.962879	-0.0932937
A0A287Y0A9	>tr|A0A287Y0A9|A0A287Y0A9_HORVV 4-hydroxy-4-methyl-2-oxoglutarate aldolase OS=Hordeum vulgare subsp. vulgare OX=112509 PE=3 SV=1	0.472045	0.462695	0.9166	0.980194	-0.0493385
A0A292G355	>tr|A0A292G355|A0A292G355_HORVU GDSL esterase/lipase OS=Hordeum vulgare OX=4513 GN=cer-zv PE=2 SV=1	0.68105	0.747704	0.352166	1.09787	0.230283	cer-zv
A0A2P1AB13	>tr|A0A2P1AB13|A0A2P1AB13_HORVV Glucose-1-phosphate adenylyltransferase OS=Hordeum vulgare subsp. vulgare OX=112509 PE=2 SV=1	5.69985	5.76193	0.934984	1.01089	0.0267125
A0A2P1AHN1	>tr|A0A2P1AHN1|A0A2P1AHN1_HORVU VirE2-interacting protein 1 OS=Hordeum vulgare OX=4513 GN=VIP1 PE=2 SV=1	0.666344	0.724819	0.876596	1.08775	0.207454	VIP1
A0A2Z6DS22	>tr|A0A2Z6DS22|A0A2Z6DS22_HORVV alanine transaminase OS=Hordeum vulgare subsp. vulgare OX=112509 GN=AlaAT PE=3 SV=1	0.622823	0.529609	0.796235	0.850337	-0.399843	AlaAT
A0A3B6XI31	>tr|A0A3B6XI31|A0A3B6XI31_HORVV Hordoindoline a OS=Hordeum vulgare subsp. vulgare OX=112509 GN=Hina PE=4 SV=1	8.96024	7.19759	0.476237	0.803281	-0.540244	Hina
A0A3B6XI84	>tr|A0A3B6XI84|A0A3B6XI84_HORVV Hordoindoline b-2 OS=Hordeum vulgare subsp. vulgare OX=112509 GN=Hinb-2 PE=4 SV=1	13.7934	11.0197	0.355537	0.798906	-0.553714	Hinb-2
A0A3F2YAL5	>tr|A0A3F2YAL5|A0A3F2YAL5_HORVV Hordoindoline b-1 OS=Hordeum vulgare subsp. vulgare OX=112509 GN=Hinb-1 PE=4 SV=1	13.9356	8.89248	0.406322	0.638113	-1.10796	Hinb-1
A0A3G9EF67	>tr|A0A3G9EF67|A0A3G9EF67_HORVV ADP-glucose transporter OS=Hordeum vulgare subsp. vulgare OX=112509 GN=Lys5 PE=3 SV=1	3.56589	3.37743	0.529297	0.947149	-0.133917	Lys5
A0A3S9KBF3	>tr|A0A3S9KBF3|A0A3S9KBF3_HORVU Glucose-6-phosphate 1-dehydrogenase OS=Hordeum vulgare OX=4513 PE=2 SV=1	0.616897	0.540099	0.226955	0.875508	-0.327896
A0A3S9KBF9	>tr|A0A3S9KBF9|A0A3S9KBF9_HORVU Glucose-6-phosphate 1-dehydrogenase OS=Hordeum vulgare OX=4513 PE=2 SV=1	0.384825	0.46987	0.692698	1.221	0.492441
A0A482LM43	>tr|A0A482LM43|A0A482LM43_HORVU Beta-amylase OS=Hordeum vulgare OX=4513 GN=Bmy1 PE=3 SV=1	39.7448	33.245	0.125373	0.836462	-0.440419	Bmy1
A0A5B9D476	>tr|A0A5B9D476|A0A5B9D476_HORVS ATP synthase protein MI25 OS=Hordeum vulgare subsp. spontaneum OX=77009 GN=atp4 PE=2 SV=1	1.30122	1.90212	0.540828	1.46179	0.936365	atp4
A0A5C1YV39	>tr|A0A5C1YV39|A0A5C1YV39_HORVV acetyl-CoA carboxylase OS=Hordeum vulgare subsp. vulgare OX=112509 PE=2 SV=1	0.282474	0.853941	0.106658	3.02308	2.72841
A0A649WBX9	>tr|A0A649WBX9|A0A649WBX9_HORVV NADH-ubiquinone oxidoreductase chain 1 OS=Hordeum vulgare subsp. vulgare OX=112509 GN=nad1 PE=3 SV=1	0.590938	0.594563	0.891862	1.00614	0.0150852	nad1
A0A650D547	>tr|A0A650D547|A0A650D547_HORVV DHN4 OS=Hordeum vulgare subsp. vulgare OX=112509 PE=2 SV=1	6.01803	2.45192	0.305787	0.407429	-2.21447
A0A6B9VQN6	>tr|A0A6B9VQN6|A0A6B9VQN6_HORVV Low molecular weight glutenin subunit (Fragment) OS=Hordeum vulgare subsp. vulgare OX=112509 PE=4 SV=1	3.58005	1.54912	0.111362	0.432709	-2.066
A0A7D5DB82	>tr|A0A7D5DB82|A0A7D5DB82_HORVV Sucrose-phosphatase OS=Hordeum vulgare subsp. vulgare OX=112509 PE=2 SV=1	2.80287	2.6919	0.591619	0.960409	-0.0996284
A0A7D5DC77	>tr|A0A7D5DC77|A0A7D5DC77_HORVV Sucrose-phosphate synthase OS=Hordeum vulgare subsp. vulgare OX=112509 PE=2 SV=1	2.97502	4.42152	0.578257	1.48622	0.977234
A0A7S9YWD1	>tr|A0A7S9YWD1|A0A7S9YWD1_HORVV Peroxiredoxin OS=Hordeum vulgare subsp. vulgare OX=112509 PE=2 SV=1	6.48987	9.29527	0.120984	1.43227	0.88605
A0A897Q2U1	>tr|A0A897Q2U1|A0A897Q2U1_HORVS HVA1 OS=Hordeum vulgare subsp. spontaneum OX=77009 GN=HVA1 PE=3 SV=1	30.642	24.5676	0.433803	0.801762	-0.544914	HVA1
A0A8I6W3X0	>tr|A0A8I6W3X0|A0A8I6W3X0_HORVV ADF-H domain-containing protein OS=Hordeum vulgare subsp. vulgare OX=112509 PE=3 SV=1	0.395115	0.373597	0.845179	0.945539	-0.138113
A0A8I6W429	>tr|A0A8I6W429|A0A8I6W429_HORVV Uncharacterized protein OS=Hordeum vulgare subsp. vulgare OX=112509 PE=4 SV=1	0.675524	0.696303	0.737677	1.03076	0.07472
A0A8I6W4A1	>tr|A0A8I6W4A1|A0A8I6W4A1_HORVV Isovaleryl-CoA dehydrogenase, mitochondrial OS=Hordeum vulgare subsp. vulgare OX=112509 PE=3 SV=1	0.967582	1.05014	0.706739	1.08533	0.201942
A0A8I6W4Q8	>tr|A0A8I6W4Q8|A0A8I6W4Q8_HORVV Cullin family profile domain-containing protein OS=Hordeum vulgare subsp. vulgare OX=112509 PE=3 SV=1	0.562871	1.3156	0.531401	2.3373	2.09388
A0A8I6W4X4	>tr|A0A8I6W4X4|A0A8I6W4X4_HORVV Ribosomal protein L10e/L16 domain-containing protein OS=Hordeum vulgare subsp. vulgare OX=112509 PE=3 SV=1	3.0187	2.16906	0.258234	0.718539	-0.8152
A0A8I6W507	>tr|A0A8I6W507|A0A8I6W507_HORVV PB1 domain-containing protein OS=Hordeum vulgare subsp. vulgare OX=112509 PE=4 SV=1	0.369765	0.351471	0.921168	0.950527	-0.125137
A0A8I6W5F0	>tr|A0A8I6W5F0|A0A8I6W5F0_HORVV NAD(P)H dehydrogenase (quinone) OS=Hordeum vulgare subsp. vulgare OX=112509 PE=3 SV=1	0.639432	0.696219	0.666716	1.08881	0.209843
A0A8I6W5Q4	>tr|A0A8I6W5Q4|A0A8I6W5Q4_HORVV Prefoldin subunit 5 OS=Hordeum vulgare subsp. vulgare OX=112509 PE=3 SV=1	4.04647	2.99481	0.176624	0.740104	-0.742271
A0A8I6W6F0	>tr|A0A8I6W6F0|A0A8I6W6F0_HORVV Glycoside hydrolase family 31 N-terminal domain-containing protein OS=Hordeum vulgare subsp. vulgare OX=112509 PE=3 SV=1	1.184	1.67976	0.609323	1.41872	0.862599
A0A8I6W6I7	>tr|A0A8I6W6I7|A0A8I6W6I7_HORVV RanBD1 domain-containing protein OS=Hordeum vulgare subsp. vulgare OX=112509 PE=4 SV=1	1.9363	2.12084	0.701305	1.09531	0.224519
A0A8I6W6N1	>tr|A0A8I6W6N1|A0A8I6W6N1_HORVV Glycosyl hydrolase family 13 catalytic domain-containing protein OS=Hordeum vulgare subsp. vulgare OX=112509 PE=4 SV=1	1.40163	1.11315	0.402221	0.794182	-0.568343
A0A8I6W6Q7	>tr|A0A8I6W6Q7|A0A8I6W6Q7_HORVV DNA replication licensing factor MCM2 OS=Hordeum vulgare subsp. vulgare OX=112509 PE=4 SV=1	1.81098	1.49554	0.0444429	0.825819	-0.471999
A0A8I6W6U7	>tr|A0A8I6W6U7|A0A8I6W6U7_HORVV Uncharacterized protein OS=Hordeum vulgare subsp. vulgare OX=112509 PE=4 SV=1	0.533881	0.378952	0.166361	0.709806	-0.845359
A0A8I6W7E8	>tr|A0A8I6W7E8|A0A8I6W7E8_HORVV RRM domain-containing protein OS=Hordeum vulgare subsp. vulgare OX=112509 PE=4 SV=1	0.759951	0.744552	0.841084	0.979738	-0.050486
A0A8I6W7H3	>tr|A0A8I6W7H3|A0A8I6W7H3_HORVV dolichyl-diphosphooligosaccharide--protein glycotransferase OS=Hordeum vulgare subsp. vulgare OX=112509 PE=3 SV=1	0.681635	0.56997	0.568979	0.836181	-0.441248
A0A8I6W7J3	>tr|A0A8I6W7J3|A0A8I6W7J3_HORVV Proline iminopeptidase OS=Hordeum vulgare subsp. vulgare OX=112509 PE=3 SV=1	3.08067	3.13314	0.980752	1.01703	0.0416567
A0A8I6W7S3	>tr|A0A8I6W7S3|A0A8I6W7S3_HORVV Btz domain-containing protein OS=Hordeum vulgare subsp. vulgare OX=112509 PE=3 SV=1	0.609815	0.714697	0.405059	1.17199	0.391408
A0A8I6W7Y2	>tr|A0A8I6W7Y2|A0A8I6W7Y2_HORVV ATP synthase subunit beta OS=Hordeum vulgare subsp. vulgare OX=112509 PE=3 SV=1	3.70363	4.14695	0.734891	1.1197	0.278836
A0A8I6W878	>tr|A0A8I6W878|A0A8I6W878_HORVV Uncharacterized protein OS=Hordeum vulgare subsp. vulgare OX=112509 PE=3 SV=1	1.61466	1.29938	0.545022	0.804737	-0.535778
A0A8I6W8C2	>tr|A0A8I6W8C2|A0A8I6W8C2_HORVV Eukaryotic translation initiation factor 3 subunit D OS=Hordeum vulgare subsp. vulgare OX=112509 PE=3 SV=1	0.785879	1.16037	0.602951	1.47652	0.961094
A0A8I6W8M4	>tr|A0A8I6W8M4|A0A8I6W8M4_HORVV Calcium-dependent protein kinase OS=Hordeum vulgare subsp. vulgare OX=112509 PE=4 SV=1	1.13462	1.29128	0.629259	1.13807	0.318971
A0A8I6W8X9	>tr|A0A8I6W8X9|A0A8I6W8X9_HORVV RRM domain-containing protein OS=Hordeum vulgare subsp. vulgare OX=112509 PE=4 SV=1	0.913137	1.27268	0.405579	1.39374	0.818793
A0A8I6W9A2	>tr|A0A8I6W9A2|A0A8I6W9A2_HORVV Uncharacterized protein OS=Hordeum vulgare subsp. vulgare OX=112509 PE=3 SV=1	0.789219	0.653011	0.0659242	0.827414	-0.46724
A0A8I6W9H5	>tr|A0A8I6W9H5|A0A8I6W9H5_HORVV RuBisCO large subunit-binding protein subunit alpha, chloroplastic OS=Hordeum vulgare subsp. vulgare OX=112509 PE=3 SV=1	0.756904	1.45335	0.386537	1.92012	1.60899
A0A8I6WA99	>tr|A0A8I6WA99|A0A8I6WA99_HORVV FAD-binding FR-type domain-containing protein OS=Hordeum vulgare subsp. vulgare OX=112509 PE=4 SV=1	0.567923	0.341203	0.280858	0.600791	-1.2566
A0A8I6WAB6	>tr|A0A8I6WAB6|A0A8I6WAB6_HORVV Association with the SNF1 complex (ASC) domain-containing protein OS=Hordeum vulgare subsp. vulgare OX=112509 PE=3 SV=1	0.603238	0.309158	0.00862674	0.512498	-1.64862
A0A8I6WAU3	>tr|A0A8I6WAU3|A0A8I6WAU3_HORVV Uncharacterized protein OS=Hordeum vulgare subsp. vulgare OX=112509 PE=3 SV=1	3.15789	2.47891	0.0824039	0.784991	-0.59705
A0A8I6WAU6	>tr|A0A8I6WAU6|A0A8I6WAU6_HORVV Trafficking protein particle complex subunit OS=Hordeum vulgare subsp. vulgare OX=112509 PE=3 SV=1	2.0209	2.28063	0.71852	1.12852	0.298203
A0A8I6WB19	>tr|A0A8I6WB19|A0A8I6WB19_HORVV Uncharacterized protein OS=Hordeum vulgare subsp. vulgare OX=112509 PE=4 SV=1	0.567897	0.584415	0.939546	1.02909	0.0707118
A0A8I6WB26	>tr|A0A8I6WB26|A0A8I6WB26_HORVV Uncharacterized protein OS=Hordeum vulgare subsp. vulgare OX=112509 PE=4 SV=1	1.04091	1.06908	0.780306	1.02707	0.0658672
A0A8I6WB52	>tr|A0A8I6WB52|A0A8I6WB52_HORVV Bifunctional inhibitor/plant lipid transfer protein/seed storage helical domain-containing protein OS=Hordeum vulgare subsp. vulgare OX=112509 PE=4 SV=1	15.375	7.34475	0.119138	0.477706	-1.82201
A0A8I6WB89	>tr|A0A8I6WB89|A0A8I6WB89_HORVV VWFA domain-containing protein OS=Hordeum vulgare subsp. vulgare OX=112509 PE=4 SV=1	0.670327	0.614483	0.701603	0.916691	-0.214531
A0A8I6WBH0	>tr|A0A8I6WBH0|A0A8I6WBH0_HORVV WPP domain-containing protein OS=Hordeum vulgare subsp. vulgare OX=112509 PE=4 SV=1	1.93106	1.78005	0.766726	0.921804	-0.200814
A0A8I6WBL2	>tr|A0A8I6WBL2|A0A8I6WBL2_HORVV Cullin family profile domain-containing protein OS=Hordeum vulgare subsp. vulgare OX=112509 PE=3 SV=1	0.923036	0.966951	0.464928	1.04758	0.114632
A0A8I6WBR4	>tr|A0A8I6WBR4|A0A8I6WBR4_HORVV Acyl-coenzyme A oxidase OS=Hordeum vulgare subsp. vulgare OX=112509 PE=3 SV=1	1.67168	2.15758	0.646091	1.29066	0.62929
A0A8I6WBW4	>tr|A0A8I6WBW4|A0A8I6WBW4_HORVV Peroxidase OS=Hordeum vulgare subsp. vulgare OX=112509 PE=3 SV=1	0.843415	0.781412	0.528894	0.926485	-0.188319
A0A8I6WC09	>tr|A0A8I6WC09|A0A8I6WC09_HORVV MI domain-containing protein OS=Hordeum vulgare subsp. vulgare OX=112509 PE=3 SV=1	3.07256	2.39344	0.0160357	0.778972	-0.616034
A0A8I6WCB5	>tr|A0A8I6WCB5|A0A8I6WCB5_HORVV Coatomer subunit gamma OS=Hordeum vulgare subsp. vulgare OX=112509 PE=3 SV=1	0.975667	1.07606	0.881428	1.10289	0.24154
A0A8I6WCK6	>tr|A0A8I6WCK6|A0A8I6WCK6_HORVV RRM domain-containing protein OS=Hordeum vulgare subsp. vulgare OX=112509 PE=4 SV=1	2.08616	4.80614	0.308002	2.30383	2.0583
A0A8I6WCL2	>tr|A0A8I6WCL2|A0A8I6WCL2_HORVV RRM domain-containing protein OS=Hordeum vulgare subsp. vulgare OX=112509 PE=4 SV=1	0.436044	0.435106	0.994882	0.997848	-0.00531299
A0A8I6WCM0	>tr|A0A8I6WCM0|A0A8I6WCM0_HORVV methionine S-methyltransferase OS=Hordeum vulgare subsp. vulgare OX=112509 PE=3 SV=1	0.835654	0.944811	0.599847	1.13062	0.302787
A0A8I6WCU8	>tr|A0A8I6WCU8|A0A8I6WCU8_HORVV Uncharacterized protein OS=Hordeum vulgare subsp. vulgare OX=112509 PE=4 SV=1	0.561301	0.60004	0.733712	1.06902	0.164602
A0A8I6WCU9	>tr|A0A8I6WCU9|A0A8I6WCU9_HORVV J domain-containing protein OS=Hordeum vulgare subsp. vulgare OX=112509 PE=4 SV=1	1.16448	1.3294	0.57209	1.14163	0.326675
A0A8I6WCV5	>tr|A0A8I6WCV5|A0A8I6WCV5_HORVV Inositol-tetrakisphosphate 1-kinase OS=Hordeum vulgare subsp. vulgare OX=112509 PE=3 SV=1	4.05662	6.24236	0.485683	1.53881	1.06299
A0A8I6WD25	>tr|A0A8I6WD25|A0A8I6WD25_HORVV Beta-hexosaminidase OS=Hordeum vulgare subsp. vulgare OX=112509 PE=3 SV=1	0.65187	0.595188	0.471307	0.913047	-0.224355
A0A8I6WD43	>tr|A0A8I6WD43|A0A8I6WD43_HORVV Alginate lyase 2 domain-containing protein OS=Hordeum vulgare subsp. vulgare OX=112509 PE=4 SV=1	0.611904	0.531565	0.6806	0.868706	-0.347133
A0A8I6WD63	>tr|A0A8I6WD63|A0A8I6WD63_HORVV Uncharacterized protein OS=Hordeum vulgare subsp. vulgare OX=112509 PE=3 SV=1	27.7198	24.8427	0.443729	0.896208	-0.270263
A0A8I6WD69	>tr|A0A8I6WD69|A0A8I6WD69_HORVV GCK domain-containing protein OS=Hordeum vulgare subsp. vulgare OX=112509 PE=4 SV=1	1.41652	0.775189	0.0489544	0.547247	-1.48682
A0A8I6WD99	>tr|A0A8I6WD99|A0A8I6WD99_HORVV 4-hydroxy-7-methoxy-3-oxo-3,4-dihydro-2H-1,4-benzoxazin-2-yl glucosidebeta-D-glucosidase OS=Hordeum vulgare subsp. vulgare OX=112509 PE=3 SV=1	0.735202	1.25622	0.24247	1.70868	1.32125
A0A8I6WDG9	>tr|A0A8I6WDG9|A0A8I6WDG9_HORVV Bifunctional inhibitor/plant lipid transfer protein/seed storage helical domain-containing protein OS=Hordeum vulgare subsp. vulgare OX=112509 PE=3 SV=1	1.83688	2.29262	0.371548	1.2481	0.546596
A0A8I6WDH7	>tr|A0A8I6WDH7|A0A8I6WDH7_HORVV Tetratricopeptide SHNi-TPR domain-containing protein OS=Hordeum vulgare subsp. vulgare OX=112509 PE=3 SV=1	1.72511	2.03285	0.224753	1.17839	0.404839
A0A8I6WDM0	>tr|A0A8I6WDM0|A0A8I6WDM0_HORVV Bowman-Birk serine protease inhibitors family domain-containing protein OS=Hordeum vulgare subsp. vulgare OX=112509 PE=4 SV=1	7.85596	6.22622	0.262452	0.792548	-0.573422
A0A8I6WDM4	>tr|A0A8I6WDM4|A0A8I6WDM4_HORVV alanine transaminase OS=Hordeum vulgare subsp. vulgare OX=112509 PE=3 SV=1	0.733772	0.80032	0.562803	1.09069	0.214109
A0A8I6WDR3	>tr|A0A8I6WDR3|A0A8I6WDR3_HORVV V-type proton ATPase proteolipid subunit OS=Hordeum vulgare subsp. vulgare OX=112509 PE=3 SV=1	1.24327	0.868671	0.0921999	0.698702	-0.884247
A0A8I6WDR8	>tr|A0A8I6WDR8|A0A8I6WDR8_HORVV Phosphoglycerate kinase OS=Hordeum vulgare subsp. vulgare OX=112509 PE=3 SV=1	2.33203	1.90142	0.030531	0.815353	-0.503457
A0A8I6WDS1	>tr|A0A8I6WDS1|A0A8I6WDS1_HORVV C2H2-type domain-containing protein OS=Hordeum vulgare subsp. vulgare OX=112509 PE=4 SV=1	0.712385	0.34608	0.0183535	0.485805	-1.78054
A0A8I6WDV9	>tr|A0A8I6WDV9|A0A8I6WDV9_HORVV Histone H3 OS=Hordeum vulgare subsp. vulgare OX=112509 PE=3 SV=1	1.57335	3.46481	0.154895	2.20218	1.94702
A0A8I6WDX9	>tr|A0A8I6WDX9|A0A8I6WDX9_HORVV Bacterial surface antigen (D15) domain-containing protein OS=Hordeum vulgare subsp. vulgare OX=112509 PE=3 SV=1	0.855731	0.76241	0.854581	0.890946	-0.284787
A0A8I6WDY7	>tr|A0A8I6WDY7|A0A8I6WDY7_HORVV SelT-like protein OS=Hordeum vulgare subsp. vulgare OX=112509 PE=4 SV=1	0.488296	0.417797	0.376074	0.855623	-0.38456
A0A8I6WE67	>tr|A0A8I6WE67|A0A8I6WE67_HORVV glutathione transferase OS=Hordeum vulgare subsp. vulgare OX=112509 PE=3 SV=1	1.19272	0.485123	0.110292	0.406737	-2.21866
A0A8I6WE83	>tr|A0A8I6WE83|A0A8I6WE83_HORVV Patellin-5 OS=Hordeum vulgare subsp. vulgare OX=112509 PE=3 SV=1	6.53634	5.4613	0.470858	0.83553	-0.443168
A0A8I6WEA7	>tr|A0A8I6WEA7|A0A8I6WEA7_HORVV Peripheral-type benzodiazepine receptor OS=Hordeum vulgare subsp. vulgare OX=112509 PE=3 SV=1	2.05541	4.24655	0.053886	2.06603	1.78962
A0A8I6WEB0	>tr|A0A8I6WEB0|A0A8I6WEB0_HORVV Uncharacterized protein OS=Hordeum vulgare subsp. vulgare OX=112509 PE=3 SV=1	1.68797	0.878184	0.210299	0.520259	-1.61155
A0A8I6WEF4	>tr|A0A8I6WEF4|A0A8I6WEF4_HORVV Tubulin gamma chain OS=Hordeum vulgare subsp. vulgare OX=112509 PE=3 SV=1	0.666855	0.609856	0.720994	0.914525	-0.220364
A0A8I6WEG8	>tr|A0A8I6WEG8|A0A8I6WEG8_HORVV SAM domain-containing protein OS=Hordeum vulgare subsp. vulgare OX=112509 PE=4 SV=1	0.561975	0.443115	0.497626	0.788496	-0.586063
A0A8I6WEH2	>tr|A0A8I6WEH2|A0A8I6WEH2_HORVV Dihydrolipoyl dehydrogenase OS=Hordeum vulgare subsp. vulgare OX=112509 PE=3 SV=1	3.02539	3.78872	0.361436	1.25231	0.554887
A0A8I6WEI5	>tr|A0A8I6WEI5|A0A8I6WEI5_HORVV DNA-binding protein S1FA OS=Hordeum vulgare subsp. vulgare OX=112509 PE=3 SV=1	0.562344	0.349315	0.445918	0.621178	-1.1743
A0A8I6WEK2	>tr|A0A8I6WEK2|A0A8I6WEK2_HORVV Uncharacterized protein OS=Hordeum vulgare subsp. vulgare OX=112509 PE=4 SV=1	0.287875	0.333693	0.641529	1.15916	0.364264
A0A8I6WEP4	>tr|A0A8I6WEP4|A0A8I6WEP4_HORVV Bifunctional inhibitor/plant lipid transfer protein/seed storage helical domain-containing protein OS=Hordeum vulgare subsp. vulgare OX=112509 PE=4 SV=1	0.463914	0.487552	0.891616	1.05095	0.122569
A0A8I6WEQ3	>tr|A0A8I6WEQ3|A0A8I6WEQ3_HORVV Uncharacterized protein OS=Hordeum vulgare subsp. vulgare OX=112509 PE=4 SV=1	0.996375	0.723024	0.141237	0.725654	-0.790899
A0A8I6WF01	>tr|A0A8I6WF01|A0A8I6WF01_HORVV GB1/RHD3-type G domain-containing protein OS=Hordeum vulgare subsp. vulgare OX=112509 PE=3 SV=1	1.28177	0.794927	0.441607	0.620177	-1.17828
A0A8I6WF61	>tr|A0A8I6WF61|A0A8I6WF61_HORVV PLAT domain-containing protein OS=Hordeum vulgare subsp. vulgare OX=112509 PE=4 SV=1	0.683847	0.494006	0.353645	0.722393	-0.802008
A0A8I6WF68	>tr|A0A8I6WF68|A0A8I6WF68_HORVV Carboxypeptidase OS=Hordeum vulgare subsp. vulgare OX=112509 PE=3 SV=1	2.38223	2.51361	0.666879	1.05515	0.132391
A0A8I6WF89	>tr|A0A8I6WF89|A0A8I6WF89_HORVV lactoylglutathione lyase OS=Hordeum vulgare subsp. vulgare OX=112509 PE=3 SV=1	1.59095	1.97315	0.417054	1.24023	0.530995
A0A8I6WF91	>tr|A0A8I6WF91|A0A8I6WF91_HORVV Peroxisomal membrane protein PEX14 OS=Hordeum vulgare subsp. vulgare OX=112509 PE=3 SV=1	1.61553	1.68348	0.932117	1.04206	0.101612
A0A8I6WF98	>tr|A0A8I6WF98|A0A8I6WF98_HORVV Major facilitator superfamily (MFS) profile domain-containing protein OS=Hordeum vulgare subsp. vulgare OX=112509 PE=3 SV=1	1.51997	1.41198	0.337737	0.928953	-0.18176
A0A8I6WFA7	>tr|A0A8I6WFA7|A0A8I6WFA7_HORVV Transcription initiation factor IIF subunit alpha OS=Hordeum vulgare subsp. vulgare OX=112509 PE=3 SV=1	0.427621	0.356394	0.46855	0.833434	-0.449364
A0A8I6WFE4	>tr|A0A8I6WFE4|A0A8I6WFE4_HORVV tryptophan synthase OS=Hordeum vulgare subsp. vulgare OX=112509 PE=3 SV=1	1.66075	1.74034	0.688909	1.04792	0.115446
A0A8I6WFG3	>tr|A0A8I6WFG3|A0A8I6WFG3_HORVV acetyl-CoA C-acyltransferase OS=Hordeum vulgare subsp. vulgare OX=112509 PE=3 SV=1	0.535421	0.376834	0.418845	0.703809	-0.866286
A0A8I6WFI5	>tr|A0A8I6WFI5|A0A8I6WFI5_HORVV Uncharacterized protein OS=Hordeum vulgare subsp. vulgare OX=112509 PE=4 SV=1	0.707763	0.550581	0.0673901	0.777918	-0.619374
A0A8I6WFJ6	>tr|A0A8I6WFJ6|A0A8I6WFJ6_HORVV U6 snRNA-associated Sm-like protein LSm8 OS=Hordeum vulgare subsp. vulgare OX=112509 GN=LSM8 PE=3 SV=1	1.61795	0.996976	0.0602049	0.616196	-1.19416	LSM8
A0A8I6WFL1	>tr|A0A8I6WFL1|A0A8I6WFL1_HORVV Uncharacterized protein OS=Hordeum vulgare subsp. vulgare OX=112509 PE=3 SV=1	0.671881	0.531945	0.387602	0.791725	-0.575984
A0A8I6WFM8	>tr|A0A8I6WFM8|A0A8I6WFM8_HORVV protein disulfide-isomerase OS=Hordeum vulgare subsp. vulgare OX=112509 PE=3 SV=1	6.62463	6.38954	0.516012	0.964513	-0.0891129
A0A8I6WFR0	>tr|A0A8I6WFR0|A0A8I6WFR0_HORVV Ubiquitin-like domain-containing protein OS=Hordeum vulgare subsp. vulgare OX=112509 PE=3 SV=1	1.34786	1.30521	0.905202	0.968353	-0.0793126
A0A8I6WFS4	>tr|A0A8I6WFS4|A0A8I6WFS4_HORVV K Homology domain-containing protein OS=Hordeum vulgare subsp. vulgare OX=112509 PE=4 SV=1	0.544316	0.550031	0.851236	1.0105	0.0257597
A0A8I6WFT0	>tr|A0A8I6WFT0|A0A8I6WFT0_HORVV PTM/DIR17-like Tudor domain-containing protein OS=Hordeum vulgare subsp. vulgare OX=112509 PE=4 SV=1	1.32507	1.53943	0.587716	1.16178	0.369826
A0A8I6WFT1	>tr|A0A8I6WFT1|A0A8I6WFT1_HORVV Alpha-galactosidase OS=Hordeum vulgare subsp. vulgare OX=112509 PE=3 SV=1	1.31698	1.37123	0.811498	1.04119	0.0995589
A0A8I6WFT4	>tr|A0A8I6WFT4|A0A8I6WFT4_HORVV Uncharacterized protein OS=Hordeum vulgare subsp. vulgare OX=112509 PE=4 SV=1	0.705387	0.616258	0.231048	0.873644	-0.333153
A0A8I6WFZ9	>tr|A0A8I6WFZ9|A0A8I6WFZ9_HORVV Mitochondrial inner membrane protease subunit OS=Hordeum vulgare subsp. vulgare OX=112509 PE=4 SV=1	0.791283	0.678504	0.632503	0.857474	-0.379231
A0A8I6WG48	>tr|A0A8I6WG48|A0A8I6WG48_HORVV UBC core domain-containing protein OS=Hordeum vulgare subsp. vulgare OX=112509 PE=3 SV=1	1.75302	1.49263	0.243756	0.851463	-0.39658
A0A8I6WG67	>tr|A0A8I6WG67|A0A8I6WG67_HORVV Phosphotransferase OS=Hordeum vulgare subsp. vulgare OX=112509 PE=3 SV=1	1.45555	1.58221	0.776829	1.08702	0.205789
A0A8I6WG79	>tr|A0A8I6WG79|A0A8I6WG79_HORVV Thioredoxin-like fold domain-containing protein OS=Hordeum vulgare subsp. vulgare OX=112509 PE=4 SV=1	0.830121	0.75854	0.177264	0.91377	-0.222401
A0A8I6WG81	>tr|A0A8I6WG81|A0A8I6WG81_HORVV Mitochondrial dicarboxylate/tricarboxylate transporter DTC OS=Hordeum vulgare subsp. vulgare OX=112509 PE=3 SV=1	2.63571	2.37869	0.45724	0.902486	-0.253049
A0A8I6WG88	>tr|A0A8I6WG88|A0A8I6WG88_HORVV Plasma membrane intrinsic protein OS=Hordeum vulgare subsp. vulgare OX=112509 PE=3 SV=1	0.765131	0.680948	0.218935	0.889976	-0.287473
A0A8I6WG99	>tr|A0A8I6WG99|A0A8I6WG99_HORVV Histone H2B OS=Hordeum vulgare subsp. vulgare OX=112509 PE=3 SV=1	0.926314	0.350522	0.0791653	0.378406	-2.39672
A0A8I6WGC0	>tr|A0A8I6WGC0|A0A8I6WGC0_HORVV EF-hand domain-containing protein OS=Hordeum vulgare subsp. vulgare OX=112509 PE=4 SV=1	0.422241	0.318699	0.508097	0.754779	-0.693846
A0A8I6WGE8	>tr|A0A8I6WGE8|A0A8I6WGE8_HORVV Amine oxidase OS=Hordeum vulgare subsp. vulgare OX=112509 PE=3 SV=1	3.44788	3.1964	0.364788	0.927062	-0.186785
A0A8I6WGF2	>tr|A0A8I6WGF2|A0A8I6WGF2_HORVV Uncharacterized protein OS=Hordeum vulgare subsp. vulgare OX=112509 PE=3 SV=1	0.694392	0.78962	0.683302	1.13714	0.31696
A0A8I6WGF3	>tr|A0A8I6WGF3|A0A8I6WGF3_HORVV Tr-type G domain-containing protein OS=Hordeum vulgare subsp. vulgare OX=112509 PE=3 SV=1	2.86657	2.12592	0.37168	0.741625	-0.737206
A0A8I6WGF6	>tr|A0A8I6WGF6|A0A8I6WGF6_HORVV Uncharacterized protein OS=Hordeum vulgare subsp. vulgare OX=112509 PE=4 SV=1	6.52556	5.14873	0.274574	0.789009	-0.584458
A0A8I6WGG3	>tr|A0A8I6WGG3|A0A8I6WGG3_HORVV oxoglutarate dehydrogenase (succinyl-transferring) OS=Hordeum vulgare subsp. vulgare OX=112509 PE=3 SV=1	0.501169	0.740912	0.334421	1.47837	0.964173
A0A8I6WGH5	>tr|A0A8I6WGH5|A0A8I6WGH5_HORVV L-ascorbate peroxidase OS=Hordeum vulgare subsp. vulgare OX=112509 PE=3 SV=1	7.44781	7.20458	0.81442	0.967342	-0.0818898
A0A8I6WGP6	>tr|A0A8I6WGP6|A0A8I6WGP6_HORVV U6 snRNA-associated Sm-like protein LSm5 OS=Hordeum vulgare subsp. vulgare OX=112509 GN=LSM5 PE=3 SV=1	0.401038	0.361732	0.764319	0.901987	-0.254411	LSM5
A0A8I6WGR4	>tr|A0A8I6WGR4|A0A8I6WGR4_HORVV Histone H2A OS=Hordeum vulgare subsp. vulgare OX=112509 PE=3 SV=1	0.50329	0.570742	0.357731	1.13402	0.310185
A0A8I6WGR6	>tr|A0A8I6WGR6|A0A8I6WGR6_HORVV Uncharacterized protein OS=Hordeum vulgare subsp. vulgare OX=112509 PE=4 SV=1	12.0748	14.2601	0.271696	1.18098	0.41025
A0A8I6WGT2	>tr|A0A8I6WGT2|A0A8I6WGT2_HORVV Cation-transporting P-type ATPase N-terminal domain-containing protein OS=Hordeum vulgare subsp. vulgare OX=112509 PE=4 SV=1	0.743458	0.67901	0.679022	0.913313	-0.223636
A0A8I6WGX0	>tr|A0A8I6WGX0|A0A8I6WGX0_HORVV Uncharacterized protein OS=Hordeum vulgare subsp. vulgare OX=112509 PE=3 SV=1	8.82926	8.00656	0.662885	0.906821	-0.241229
A0A8I6WGX2	>tr|A0A8I6WGX2|A0A8I6WGX2_HORVV FAS1 domain-containing protein OS=Hordeum vulgare subsp. vulgare OX=112509 PE=3 SV=1	5.55798	5.11965	0.621288	0.921135	-0.202603
A0A8I6WGX4	>tr|A0A8I6WGX4|A0A8I6WGX4_HORVV Stress-related protein OS=Hordeum vulgare subsp. vulgare OX=112509 PE=3 SV=1	5.36206	4.81117	0.564182	0.897261	-0.267368
A0A8I6WGZ0	>tr|A0A8I6WGZ0|A0A8I6WGZ0_HORVV Xylose isomerase OS=Hordeum vulgare subsp. vulgare OX=112509 PE=3 SV=1	4.88862	4.70825	0.334421	0.963105	-0.0927156
A0A8I6WH07	>tr|A0A8I6WH07|A0A8I6WH07_HORVV Pre-mRNA-processing factor 19 OS=Hordeum vulgare subsp. vulgare OX=112509 PE=3 SV=1	0.726485	0.720224	0.950789	0.991383	-0.0213449
A0A8I6WH47	>tr|A0A8I6WH47|A0A8I6WH47_HORVV Glycosyltransferase OS=Hordeum vulgare subsp. vulgare OX=112509 PE=3 SV=1	0.754959	0.731222	0.646311	0.968558	-0.0787897
A0A8I6WH53	>tr|A0A8I6WH53|A0A8I6WH53_HORVV glutamate synthase (ferredoxin) OS=Hordeum vulgare subsp. vulgare OX=112509 PE=3 SV=1	0.727551	0.909383	0.0367222	1.24992	0.55019
A0A8I6WH69	>tr|A0A8I6WH69|A0A8I6WH69_HORVV 4-hydroxy-7-methoxy-3-oxo-3,4-dihydro-2H-1,4-benzoxazin-2-yl glucosidebeta-D-glucosidase OS=Hordeum vulgare subsp. vulgare OX=112509 PE=3 SV=1	9.4615	9.58519	0.939848	1.01307	0.0320319
A0A8I6WH70	>tr|A0A8I6WH70|A0A8I6WH70_HORVV Cupin type-1 domain-containing protein OS=Hordeum vulgare subsp. vulgare OX=112509 PE=3 SV=1	21.4647	18.811	0.219227	0.876373	-0.325463
A0A8I6WH75	>tr|A0A8I6WH75|A0A8I6WH75_HORVV palmitoyl-CoA hydrolase OS=Hordeum vulgare subsp. vulgare OX=112509 PE=3 SV=1	0.633627	0.423003	0.201614	0.667589	-0.99659
A0A8I6WH86	>tr|A0A8I6WH86|A0A8I6WH86_HORVV Glutathione peroxidase OS=Hordeum vulgare subsp. vulgare OX=112509 PE=3 SV=1	4.73167	4.79559	0.872261	1.01351	0.0330968
A0A8I6WHB0	>tr|A0A8I6WHB0|A0A8I6WHB0_HORVV Bowman-Birk serine protease inhibitors family domain-containing protein OS=Hordeum vulgare subsp. vulgare OX=112509 PE=4 SV=1	2.02945	1.5306	0.183604	0.754195	-0.695754
A0A8I6WHD1	>tr|A0A8I6WHD1|A0A8I6WHD1_HORVV dTMP kinase OS=Hordeum vulgare subsp. vulgare OX=112509 PE=3 SV=1	0.748387	0.643942	0.273365	0.860439	-0.370715
A0A8I6WHE1	>tr|A0A8I6WHE1|A0A8I6WHE1_HORVV Nascent polypeptide-associated complex subunit beta OS=Hordeum vulgare subsp. vulgare OX=112509 PE=3 SV=1	4.63871	4.24526	0.469086	0.91518	-0.2186
A0A8I6WHE5	>tr|A0A8I6WHE5|A0A8I6WHE5_HORVV Peroxiredoxin OS=Hordeum vulgare subsp. vulgare OX=112509 PE=3 SV=1	61.5193	49.8358	0.102528	0.810084	-0.519447
A0A8I6WHG4	>tr|A0A8I6WHG4|A0A8I6WHG4_HORVV RRM domain-containing protein OS=Hordeum vulgare subsp. vulgare OX=112509 PE=4 SV=1	0.521436	0.617465	0.631979	1.18416	0.416892
A0A8I6WHL6	>tr|A0A8I6WHL6|A0A8I6WHL6_HORVV NADH dehydrogenase [ubiquinone] 1 alpha subcomplex subunit 1 OS=Hordeum vulgare subsp. vulgare OX=112509 PE=3 SV=1	0.674656	0.613646	0.260703	0.909569	-0.233767
A0A8I6WHM6	>tr|A0A8I6WHM6|A0A8I6WHM6_HORVV AP-4 complex subunit mu-1 OS=Hordeum vulgare subsp. vulgare OX=112509 PE=3 SV=1	1.14536	1.05392	0.859384	0.920159	-0.205217
A0A8I6WHN5	>tr|A0A8I6WHN5|A0A8I6WHN5_HORVV CWF21 domain-containing protein OS=Hordeum vulgare subsp. vulgare OX=112509 PE=3 SV=1	0.879737	0.610541	0.426898	0.694004	-0.900885
A0A8I6WHT4	>tr|A0A8I6WHT4|A0A8I6WHT4_HORVV Importin subunit alpha OS=Hordeum vulgare subsp. vulgare OX=112509 PE=3 SV=1	2.5363	2.31186	0.441156	0.911507	-0.228519
A0A8I6WI16	>tr|A0A8I6WI16|A0A8I6WI16_HORVV FAD-binding PCMH-type domain-containing protein OS=Hordeum vulgare subsp. vulgare OX=112509 PE=3 SV=1	0.667482	0.637009	0.689055	0.954347	-0.115246
A0A8I6WI29	>tr|A0A8I6WI29|A0A8I6WI29_HORVV RING-type domain-containing protein OS=Hordeum vulgare subsp. vulgare OX=112509 PE=4 SV=1	0.402778	0.359077	0.584235	0.891499	-0.283256
A0A8I6WI52	>tr|A0A8I6WI52|A0A8I6WI52_HORVV MO25-like protein OS=Hordeum vulgare subsp. vulgare OX=112509 PE=3 SV=1	1.0371	1.2513	0.737991	1.20654	0.463072
A0A8I6WI77	>tr|A0A8I6WI77|A0A8I6WI77_HORVV VOC domain-containing protein OS=Hordeum vulgare subsp. vulgare OX=112509 PE=3 SV=1	0.448571	0.438237	0.927973	0.976962	-0.0574828
A0A8I6WI88	>tr|A0A8I6WI88|A0A8I6WI88_HORVV Cyclic phosphodiesterase OS=Hordeum vulgare subsp. vulgare OX=112509 PE=4 SV=1	1.20239	0.971	0.504928	0.807557	-0.527152
A0A8I6WIA8	>tr|A0A8I6WIA8|A0A8I6WIA8_HORVV Methionine gamma-lyase OS=Hordeum vulgare subsp. vulgare OX=112509 PE=3 SV=1	0.915173	0.800698	0.53678	0.874914	-0.329571
A0A8I6WIA9	>tr|A0A8I6WIA9|A0A8I6WIA9_HORVV FCP1 homology domain-containing protein OS=Hordeum vulgare subsp. vulgare OX=112509 PE=4 SV=1	0.801647	0.658301	0.0615129	0.821185	-0.485879
A0A8I6WIE7	>tr|A0A8I6WIE7|A0A8I6WIE7_HORVV methylmalonate-semialdehyde dehydrogenase (CoA acylating) OS=Hordeum vulgare subsp. vulgare OX=112509 PE=3 SV=1	2.95976	3.12481	0.662695	1.05576	0.133833
A0A8I6WIG4	>tr|A0A8I6WIG4|A0A8I6WIG4_HORVV glutathione transferase OS=Hordeum vulgare subsp. vulgare OX=112509 PE=3 SV=1	0.660656	1.10495	0.109346	1.6725	1.26847
A0A8I6WII2	>tr|A0A8I6WII2|A0A8I6WII2_HORVV glutathione transferase OS=Hordeum vulgare subsp. vulgare OX=112509 PE=4 SV=1	0.382254	0.529773	0.692937	1.38592	0.804911
A0A8I6WIK7	>tr|A0A8I6WIK7|A0A8I6WIK7_HORVV 6-phosphogluconate dehydrogenase, decarboxylating OS=Hordeum vulgare subsp. vulgare OX=112509 PE=3 SV=1	1.98449	0.886147	0.131474	0.446536	-1.98842
A0A8I6WIM9	>tr|A0A8I6WIM9|A0A8I6WIM9_HORVV UBC core domain-containing protein OS=Hordeum vulgare subsp. vulgare OX=112509 PE=3 SV=1	3.00303	2.51391	0.211531	0.837124	-0.438468
A0A8I6WIN4	>tr|A0A8I6WIN4|A0A8I6WIN4_HORVV GS catalytic domain-containing protein OS=Hordeum vulgare subsp. vulgare OX=112509 PE=3 SV=1	0.772122	0.628108	0.389972	0.813483	-0.509118
A0A8I6WIT4	>tr|A0A8I6WIT4|A0A8I6WIT4_HORVV Exportin-4 OS=Hordeum vulgare subsp. vulgare OX=112509 PE=3 SV=1	0.683158	0.587804	0.227925	0.860421	-0.370767
A0A8I6WIV1	>tr|A0A8I6WIV1|A0A8I6WIV1_HORVV Uncharacterized protein OS=Hordeum vulgare subsp. vulgare OX=112509 PE=4 SV=1	0.610585	0.496186	0.401272	0.812639	-0.511678
A0A8I6WIX1	>tr|A0A8I6WIX1|A0A8I6WIX1_HORVV Heat shock cognate 70 kDa protein OS=Hordeum vulgare subsp. vulgare OX=112509 PE=3 SV=1	0.896323	0.563045	0.15567	0.628172	-1.14669
A0A8I6WJ36	>tr|A0A8I6WJ36|A0A8I6WJ36_HORVV LanC-like protein GCL2 OS=Hordeum vulgare subsp. vulgare OX=112509 PE=3 SV=1	1.14179	1.44755	0.499752	1.26779	0.585194
A0A8I6WJ84	>tr|A0A8I6WJ84|A0A8I6WJ84_HORVV CCR4-NOT transcription complex subunit 1 OS=Hordeum vulgare subsp. vulgare OX=112509 PE=4 SV=1	0.658728	0.659313	0.99506	1.00089	0.00219151
A0A8I6WJ93	>tr|A0A8I6WJ93|A0A8I6WJ93_HORVV Transcription factor CBF/NF-Y/archaeal histone domain-containing protein OS=Hordeum vulgare subsp. vulgare OX=112509 PE=3 SV=1	0.381714	0.330063	0.63631	0.864686	-0.358573
A0A8I6WJD1	>tr|A0A8I6WJD1|A0A8I6WJD1_HORVV GBF-interacting protein 1 N-terminal domain-containing protein OS=Hordeum vulgare subsp. vulgare OX=112509 PE=4 SV=1	3.28262	2.58049	0.017814	0.786106	-0.593548
A0A8I6WJG5	>tr|A0A8I6WJG5|A0A8I6WJG5_HORVV PCI domain-containing protein OS=Hordeum vulgare subsp. vulgare OX=112509 PE=3 SV=1	1.22491	1.13402	0.544041	0.9258	-0.190145
A0A8I6WJH8	>tr|A0A8I6WJH8|A0A8I6WJH8_HORVV Phagocyte signaling-impaired protein OS=Hordeum vulgare subsp. vulgare OX=112509 PE=3 SV=1	1.16111	1.08181	0.67889	0.931704	-0.174466
A0A8I6WJI8	>tr|A0A8I6WJI8|A0A8I6WJI8_HORVV Major facilitator superfamily (MFS) profile domain-containing protein OS=Hordeum vulgare subsp. vulgare OX=112509 PE=4 SV=1	1.02542	1.53761	0.182245	1.4995	0.999183
A0A8I6WJJ4	>tr|A0A8I6WJJ4|A0A8I6WJJ4_HORVV glutathione transferase OS=Hordeum vulgare subsp. vulgare OX=112509 PE=3 SV=1	0.773375	0.629967	0.607783	0.814568	-0.505831
A0A8I6WJL7	>tr|A0A8I6WJL7|A0A8I6WJL7_HORVV Nucleoside diphosphate kinase OS=Hordeum vulgare subsp. vulgare OX=112509 PE=3 SV=1	7.48369	9.13431	0.248174	1.22056	0.491565
A0A8I6WJL9	>tr|A0A8I6WJL9|A0A8I6WJL9_HORVV RRM domain-containing protein OS=Hordeum vulgare subsp. vulgare OX=112509 PE=4 SV=1	1.05586	0.589115	0.215847	0.557947	-1.43907
A0A8I6WJN4	>tr|A0A8I6WJN4|A0A8I6WJN4_HORVV Uncharacterized protein OS=Hordeum vulgare subsp. vulgare OX=112509 PE=3 SV=1	0.654672	0.515214	0.259443	0.78698	-0.590809
A0A8I6WJQ4	>tr|A0A8I6WJQ4|A0A8I6WJQ4_HORVV Pyruvate dehydrogenase E1 component subunit alpha OS=Hordeum vulgare subsp. vulgare OX=112509 PE=4 SV=1	1.08868	0.71871	0.386674	0.660166	-1.02417
A0A8I6WJQ9	>tr|A0A8I6WJQ9|A0A8I6WJQ9_HORVV Peptidase M24 domain-containing protein OS=Hordeum vulgare subsp. vulgare OX=112509 PE=3 SV=1	5.84794	4.20244	0.0942596	0.718619	-0.814927
A0A8I6WJR2	>tr|A0A8I6WJR2|A0A8I6WJR2_HORVV Uncharacterized protein OS=Hordeum vulgare subsp. vulgare OX=112509 PE=4 SV=1	0.767774	0.349457	0.117998	0.455156	-1.94127
A0A8I6WJR5	>tr|A0A8I6WJR5|A0A8I6WJR5_HORVV L-ascorbate oxidase OS=Hordeum vulgare subsp. vulgare OX=112509 PE=3 SV=1	0.753978	0.741774	0.887185	0.983813	-0.0402478
A0A8I6WJW9	>tr|A0A8I6WJW9|A0A8I6WJW9_HORVV Late embryogenesis abundant protein LEA-2 subgroup domain-containing protein OS=Hordeum vulgare subsp. vulgare OX=112509 PE=4 SV=1	0.555019	0.83279	0.25389	1.50047	1.00078
A0A8I6WJX1	>tr|A0A8I6WJX1|A0A8I6WJX1_HORVV Histidine kinase/HSP90-like ATPase domain-containing protein OS=Hordeum vulgare subsp. vulgare OX=112509 PE=3 SV=1	8.09412	7.30713	0.517045	0.902769	-0.252274
A0A8I6WJX4	>tr|A0A8I6WJX4|A0A8I6WJX4_HORVV Uncharacterized protein OS=Hordeum vulgare subsp. vulgare OX=112509 PE=3 SV=1	0.980524	1.38149	0.424319	1.40893	0.845524
A0A8I6WK36	>tr|A0A8I6WK36|A0A8I6WK36_HORVV Peroxisomal adenine nucleotide carrier 1 OS=Hordeum vulgare subsp. vulgare OX=112509 PE=3 SV=1	0.647	0.581362	0.295996	0.89855	-0.263829
A0A8I6WK37	>tr|A0A8I6WK37|A0A8I6WK37_HORVV Helicase ATP-binding domain-containing protein OS=Hordeum vulgare subsp. vulgare OX=112509 PE=3 SV=1	0.642542	0.67104	0.802401	1.04435	0.107031
A0A8I6WK45	>tr|A0A8I6WK45|A0A8I6WK45_HORVV Beta-mannosidase OS=Hordeum vulgare subsp. vulgare OX=112509 PE=3 SV=1	0.711442	0.449044	0.0200729	0.631175	-1.13492
A0A8I6WK56	>tr|A0A8I6WK56|A0A8I6WK56_HORVV argininosuccinate synthase OS=Hordeum vulgare subsp. vulgare OX=112509 PE=3 SV=1	2.22815	1.74847	0.108172	0.784719	-0.597906
A0A8I6WK61	>tr|A0A8I6WK61|A0A8I6WK61_HORVV RING-type E3 ubiquitin transferase OS=Hordeum vulgare subsp. vulgare OX=112509 PE=4 SV=1	2.3277	2.02474	0.204034	0.869847	-0.343896
A0A8I6WKC3	>tr|A0A8I6WKC3|A0A8I6WKC3_HORVV Phospholipase A1 OS=Hordeum vulgare subsp. vulgare OX=112509 PE=3 SV=1	0.938787	0.871373	0.418179	0.92819	-0.183785
A0A8I6WKE5	>tr|A0A8I6WKE5|A0A8I6WKE5_HORVV GYF domain-containing protein OS=Hordeum vulgare subsp. vulgare OX=112509 PE=4 SV=1	1.21226	1.08547	0.612826	0.895408	-0.272467
A0A8I6WKF6	>tr|A0A8I6WKF6|A0A8I6WKF6_HORVV D hordein OS=Hordeum vulgare subsp. vulgare OX=112509 PE=3 SV=1	74.2907	61.0444	0.285255	0.821696	-0.484344
A0A8I6WKG3	>tr|A0A8I6WKG3|A0A8I6WKG3_HORVV Phospholipase A-2-activating protein OS=Hordeum vulgare subsp. vulgare OX=112509 PE=4 SV=1	0.637694	1.4456	0.40546	2.26692	2.01848
A0A8I6WKM0	>tr|A0A8I6WKM0|A0A8I6WKM0_HORVV Dihydroorotate dehydrogenase (quinone), mitochondrial OS=Hordeum vulgare subsp. vulgare OX=112509 PE=3 SV=1	0.437964	0.75951	0.164731	1.73419	1.35779
A0A8I6WKT1	>tr|A0A8I6WKT1|A0A8I6WKT1_HORVV Histone H2A OS=Hordeum vulgare subsp. vulgare OX=112509 PE=3 SV=1	0.895301	0.514431	0.0526141	0.57459	-1.36658
A0A8I6WKU9	>tr|A0A8I6WKU9|A0A8I6WKU9_HORVV Delta-1-pyrroline-5-carboxylate synthase OS=Hordeum vulgare subsp. vulgare OX=112509 PE=3 SV=1	2.50279	2.13384	0.638083	0.852585	-0.393332
A0A8I6WKV5	>tr|A0A8I6WKV5|A0A8I6WKV5_HORVV UBX domain-containing protein OS=Hordeum vulgare subsp. vulgare OX=112509 PE=4 SV=1	1.67046	1.24794	0.230112	0.747067	-0.719175
A0A8I6WKX9	>tr|A0A8I6WKX9|A0A8I6WKX9_HORVV Amidophosphoribosyltransferase OS=Hordeum vulgare subsp. vulgare OX=112509 PE=3 SV=1	1.07444	1.13348	0.698048	1.05495	0.131924
A0A8I6WKY2	>tr|A0A8I6WKY2|A0A8I6WKY2_HORVV Coiled-coil domain-containing protein 47 OS=Hordeum vulgare subsp. vulgare OX=112509 PE=4 SV=1	0.596075	0.723846	0.439044	1.21435	0.478986
A0A8I6WL29	>tr|A0A8I6WL29|A0A8I6WL29_HORVV Transcription termination and cleavage factor C-terminal domain-containing protein OS=Hordeum vulgare subsp. vulgare OX=112509 PE=4 SV=1	0.680568	0.309445	0.0856306	0.454686	-1.94381
A0A8I6WL50	>tr|A0A8I6WL50|A0A8I6WL50_HORVV Uncharacterized protein OS=Hordeum vulgare subsp. vulgare OX=112509 PE=4 SV=1	0.484153	0.538956	0.687613	1.11319	0.26447
A0A8I6WL52	>tr|A0A8I6WL52|A0A8I6WL52_HORVV Uncharacterized protein OS=Hordeum vulgare subsp. vulgare OX=112509 PE=4 SV=1	4.08261	3.44839	0.176623	0.844652	-0.416386
A0A8I6WL57	>tr|A0A8I6WL57|A0A8I6WL57_HORVV Reticulon-like protein OS=Hordeum vulgare subsp. vulgare OX=112509 PE=4 SV=1	0.489283	0.465032	0.881254	0.950434	-0.125378
A0A8I6WL88	>tr|A0A8I6WL88|A0A8I6WL88_HORVV ACB domain-containing protein OS=Hordeum vulgare subsp. vulgare OX=112509 PE=3 SV=1	2.22111	1.98457	0.861958	0.893504	-0.277717
A0A8I6WL98	>tr|A0A8I6WL98|A0A8I6WL98_HORVV Aldehyde dehydrogenase domain-containing protein OS=Hordeum vulgare subsp. vulgare OX=112509 PE=3 SV=1	2.03115	1.75066	0.673211	0.861902	-0.366525
A0A8I6WLA6	>tr|A0A8I6WLA6|A0A8I6WLA6_HORVV Transcription factor CBF/NF-Y/archaeal histone domain-containing protein OS=Hordeum vulgare subsp. vulgare OX=112509 PE=3 SV=1	0.734287	0.620799	0.371384	0.845444	-0.414076
A0A8I6WLD0	>tr|A0A8I6WLD0|A0A8I6WLD0_HORVV Branchpoint-bridging protein OS=Hordeum vulgare subsp. vulgare OX=112509 PE=3 SV=1	0.666953	0.724696	0.857055	1.08658	0.204782
A0A8I6WLH7	>tr|A0A8I6WLH7|A0A8I6WLH7_HORVV C2 domain-containing protein OS=Hordeum vulgare subsp. vulgare OX=112509 PE=3 SV=1	0.678148	0.595007	0.232775	0.8774	-0.322572
A0A8I6WLJ4	>tr|A0A8I6WLJ4|A0A8I6WLJ4_HORVV Chymotrypsin inhibitor-2 OS=Hordeum vulgare subsp. vulgare OX=112509 PE=3 SV=1	0.795219	0.997614	0.589602	1.25451	0.559231
A0A8I6WLJ7	>tr|A0A8I6WLJ7|A0A8I6WLJ7_HORVV Sm domain-containing protein OS=Hordeum vulgare subsp. vulgare OX=112509 PE=3 SV=1	1.32654	1.25334	0.807465	0.944821	-0.139987
A0A8I6WLS8	>tr|A0A8I6WLS8|A0A8I6WLS8_HORVV phosphoethanolamine N-methyltransferase OS=Hordeum vulgare subsp. vulgare OX=112509 PE=4 SV=1	0.318541	0.371518	0.832514	1.16631	0.379434
A0A8I6WM04	>tr|A0A8I6WM04|A0A8I6WM04_HORVV Amidase domain-containing protein OS=Hordeum vulgare subsp. vulgare OX=112509 PE=3 SV=1	0.916707	0.819238	0.80137	0.893675	-0.277245
A0A8I6WM10	>tr|A0A8I6WM10|A0A8I6WM10_HORVV Tubulin alpha chain OS=Hordeum vulgare subsp. vulgare OX=112509 PE=3 SV=1	2.18041	2.30958	0.59706	1.05924	0.14195
A0A8I6WM12	>tr|A0A8I6WM12|A0A8I6WM12_HORVV chitinase OS=Hordeum vulgare subsp. vulgare OX=112509 PE=4 SV=1	0.491147	0.365476	0.396397	0.744127	-0.728899
A0A8I6WM17	>tr|A0A8I6WM17|A0A8I6WM17_HORVV Uncharacterized protein OS=Hordeum vulgare subsp. vulgare OX=112509 PE=4 SV=1	0.43323	0.452733	0.846249	1.04502	0.1086
A0A8I6WM41	>tr|A0A8I6WM41|A0A8I6WM41_HORVV Carboxypeptidase OS=Hordeum vulgare subsp. vulgare OX=112509 PE=3 SV=1	0.530992	0.561698	0.886826	1.05783	0.13865
A0A8I6WM42	>tr|A0A8I6WM42|A0A8I6WM42_HORVV NADH dehydrogenase [ubiquinone] iron-sulfur protein 4, mitochondrial OS=Hordeum vulgare subsp. vulgare OX=112509 PE=3 SV=1	2.09757	2.87231	0.264425	1.36935	0.775251
A0A8I6WM52	>tr|A0A8I6WM52|A0A8I6WM52_HORVV Water stress and hypersensitive response domain-containing protein OS=Hordeum vulgare subsp. vulgare OX=112509 PE=3 SV=1	5.61233	4.7382	0.28656	0.844248	-0.417569
A0A8I6WM61	>tr|A0A8I6WM61|A0A8I6WM61_HORVV CBS domain-containing protein OS=Hordeum vulgare subsp. vulgare OX=112509 PE=4 SV=1	0.963987	1.0631	0.388206	1.10282	0.241368
A0A8I6WM65	>tr|A0A8I6WM65|A0A8I6WM65_HORVV RuvB-like helicase OS=Hordeum vulgare subsp. vulgare OX=112509 PE=3 SV=1	0.428714	0.343422	0.725662	0.801053	-0.547095
A0A8I6WMA2	>tr|A0A8I6WMA2|A0A8I6WMA2_HORVV Uncharacterized protein OS=Hordeum vulgare subsp. vulgare OX=112509 PE=3 SV=1	1.67963	1.98035	0.487971	1.17904	0.406199
A0A8I6WMI1	>tr|A0A8I6WMI1|A0A8I6WMI1_HORVV Protein transport protein Sec24-like OS=Hordeum vulgare subsp. vulgare OX=112509 PE=3 SV=1	0.54009	0.385828	0.559699	0.714377	-0.829528
A0A8I6WML0	>tr|A0A8I6WML0|A0A8I6WML0_HORVV Fructose-bisphosphate aldolase OS=Hordeum vulgare subsp. vulgare OX=112509 PE=3 SV=1	2.16899	2.18344	0.948494	1.00666	0.0163754
A0A8I6WML8	>tr|A0A8I6WML8|A0A8I6WML8_HORVV Uncharacterized protein OS=Hordeum vulgare subsp. vulgare OX=112509 PE=3 SV=1	69.4928	64.4414	0.360165	0.927311	-0.186124
A0A8I6WMP9	>tr|A0A8I6WMP9|A0A8I6WMP9_HORVV J domain-containing protein OS=Hordeum vulgare subsp. vulgare OX=112509 PE=4 SV=1	4.20447	3.35376	0.324397	0.797665	-0.557548
A0A8I6WMS7	>tr|A0A8I6WMS7|A0A8I6WMS7_HORVV Phosphoglycerate mutase-like protein 1 OS=Hordeum vulgare subsp. vulgare OX=112509 PE=3 SV=1	1.57908	0.867824	0.0721493	0.549577	-1.47634
A0A8I6WMV8	>tr|A0A8I6WMV8|A0A8I6WMV8_HORVV Uncharacterized protein OS=Hordeum vulgare subsp. vulgare OX=112509 PE=3 SV=1	7.88631	9.85542	0.541906	1.24969	0.549723
A0A8I6WN16	>tr|A0A8I6WN16|A0A8I6WN16_HORVV Peptidase A1 domain-containing protein OS=Hordeum vulgare subsp. vulgare OX=112509 PE=3 SV=1	0.757473	0.973226	0.274558	1.28483	0.618126
A0A8I6WN26	>tr|A0A8I6WN26|A0A8I6WN26_HORVV SHSP domain-containing protein OS=Hordeum vulgare subsp. vulgare OX=112509 PE=3 SV=1	2.37296	2.53336	0.564308	1.0676	0.161319
A0A8I6WN64	>tr|A0A8I6WN64|A0A8I6WN64_HORVV Uncharacterized protein OS=Hordeum vulgare subsp. vulgare OX=112509 PE=3 SV=1	0.804868	0.672815	0.132618	0.835932	-0.441981
A0A8I6WN69	>tr|A0A8I6WN69|A0A8I6WN69_HORVV EF-hand domain-containing protein OS=Hordeum vulgare subsp. vulgare OX=112509 PE=4 SV=1	6.33656	4.92553	0.34099	0.777319	-0.621272
A0A8I6WN81	>tr|A0A8I6WN81|A0A8I6WN81_HORVV Pyruvate kinase OS=Hordeum vulgare subsp. vulgare OX=112509 PE=3 SV=1	1.02204	1.48053	0.35735	1.44859	0.913995
A0A8I6WN97	>tr|A0A8I6WN97|A0A8I6WN97_HORVV Late embryogenesis abundant protein LEA-2 subgroup domain-containing protein OS=Hordeum vulgare subsp. vulgare OX=112509 PE=4 SV=1	0.511852	0.512225	0.996125	1.00073	0.00179349
A0A8I6WNB3	>tr|A0A8I6WNB3|A0A8I6WNB3_HORVV Protein kinase domain-containing protein OS=Hordeum vulgare subsp. vulgare OX=112509 PE=3 SV=1	0.643597	0.565295	0.63444	0.878337	-0.319942
A0A8I6WND3	>tr|A0A8I6WND3|A0A8I6WND3_HORVV Thioredoxin domain-containing protein OS=Hordeum vulgare subsp. vulgare OX=112509 PE=3 SV=1	1.04199	1.14	0.720772	1.09406	0.221718
A0A8I6WNF0	>tr|A0A8I6WNF0|A0A8I6WNF0_HORVV Bifunctional inhibitor/plant lipid transfer protein/seed storage helical domain-containing protein OS=Hordeum vulgare subsp. vulgare OX=112509 PE=3 SV=1	11.0675	9.64698	0.649434	0.871653	-0.338781
A0A8I6WNK7	>tr|A0A8I6WNK7|A0A8I6WNK7_HORVV Transmembrane protein OS=Hordeum vulgare subsp. vulgare OX=112509 PE=4 SV=1	1.03228	0.900105	0.226434	0.871958	-0.337919
A0A8I6WNQ1	>tr|A0A8I6WNQ1|A0A8I6WNQ1_HORVV Importin N-terminal domain-containing protein OS=Hordeum vulgare subsp. vulgare OX=112509 PE=4 SV=1	0.41663	0.911407	0.0941011	2.18757	1.9306
A0A8I6WNQ6	>tr|A0A8I6WNQ6|A0A8I6WNQ6_HORVV AAA+ ATPase domain-containing protein OS=Hordeum vulgare subsp. vulgare OX=112509 PE=3 SV=1	0.64398	0.646423	0.978748	1.00379	0.00933864
A0A8I6WNS5	>tr|A0A8I6WNS5|A0A8I6WNS5_HORVV Uncharacterized protein OS=Hordeum vulgare subsp. vulgare OX=112509 PE=4 SV=1	0.636814	0.57052	0.481861	0.895897	-0.27112
A0A8I6WNU9	>tr|A0A8I6WNU9|A0A8I6WNU9_HORVV Subtilisin-chymotrypsin inhibitor-2A OS=Hordeum vulgare subsp. vulgare OX=112509 PE=3 SV=1	0.416649	0.277806	0.0529158	0.666762	-0.999648
A0A8I6WNV7	>tr|A0A8I6WNV7|A0A8I6WNV7_HORVV PUM-HD domain-containing protein OS=Hordeum vulgare subsp. vulgare OX=112509 PE=4 SV=1	0.788034	1.00038	0.398316	1.26946	0.588441
A0A8I6WNV8	>tr|A0A8I6WNV8|A0A8I6WNV8_HORVV NADH:flavin oxidoreductase/NADH oxidase N-terminal domain-containing protein OS=Hordeum vulgare subsp. vulgare OX=112509 PE=3 SV=1	0.662743	0.637549	0.877019	0.961986	-0.0955827
A0A8I6WNW9	>tr|A0A8I6WNW9|A0A8I6WNW9_HORVV cysteine dioxygenase OS=Hordeum vulgare subsp. vulgare OX=112509 PE=3 SV=1	0.666796	0.496983	0.651042	0.74533	-0.724917
A0A8I6WP27	>tr|A0A8I6WP27|A0A8I6WP27_HORVV Calcineurin-like phosphoesterase domain-containing protein OS=Hordeum vulgare subsp. vulgare OX=112509 PE=4 SV=1	0.557088	0.40607	0.413398	0.728915	-0.77984
A0A8I6WP44	>tr|A0A8I6WP44|A0A8I6WP44_HORVV E3 UFM1-protein ligase 1 homolog OS=Hordeum vulgare subsp. vulgare OX=112509 PE=3 SV=1	3.08606	3.34781	0.619679	1.08482	0.200788
A0A8I6WP99	>tr|A0A8I6WP99|A0A8I6WP99_HORVV GrpE protein homolog OS=Hordeum vulgare subsp. vulgare OX=112509 PE=3 SV=1	2.71498	2.20207	0.0608123	0.81108	-0.516417
A0A8I6WPB2	>tr|A0A8I6WPB2|A0A8I6WPB2_HORVV Protein phosphatase inhibitor 2 OS=Hordeum vulgare subsp. vulgare OX=112509 PE=4 SV=1	1.16155	0.950133	0.167468	0.817989	-0.495496
A0A8I6WPE4	>tr|A0A8I6WPE4|A0A8I6WPE4_HORVV Ubiquitin-like domain-containing protein OS=Hordeum vulgare subsp. vulgare OX=112509 PE=4 SV=1	0.642037	0.717127	0.826478	1.11695	0.272788
A0A8I6WPF3	>tr|A0A8I6WPF3|A0A8I6WPF3_HORVV Xyloglucan endotransglucosylase/hydrolase OS=Hordeum vulgare subsp. vulgare OX=112509 PE=3 SV=1	0.659193	0.661465	0.986964	1.00345	0.00848382
A0A8I6WPG8	>tr|A0A8I6WPG8|A0A8I6WPG8_HORVV Histone H2B OS=Hordeum vulgare subsp. vulgare OX=112509 PE=3 SV=1	0.641775	0.351963	0.130381	0.548421	-1.48154
A0A8I6WPI8	>tr|A0A8I6WPI8|A0A8I6WPI8_HORVV Calcineurin-like phosphoesterase domain-containing protein OS=Hordeum vulgare subsp. vulgare OX=112509 PE=4 SV=1	0.392126	0.6966	0.176784	1.77647	1.41721
A0A8I6WPL5	>tr|A0A8I6WPL5|A0A8I6WPL5_HORVV t-SNARE coiled-coil homology domain-containing protein OS=Hordeum vulgare subsp. vulgare OX=112509 PE=4 SV=1	0.893972	1.07266	0.700243	1.19988	0.449421
A0A8I6WPL6	>tr|A0A8I6WPL6|A0A8I6WPL6_HORVV Trafficking protein particle complex subunit 13 OS=Hordeum vulgare subsp. vulgare OX=112509 PE=3 SV=1	0.564182	0.513039	0.248133	0.909352	-0.234357
A0A8I6WPP4	>tr|A0A8I6WPP4|A0A8I6WPP4_HORVV pyruvate decarboxylase OS=Hordeum vulgare subsp. vulgare OX=112509 PE=3 SV=1	1.96087	1.56682	0.30953	0.799043	-0.553293
A0A8I6WPR8	>tr|A0A8I6WPR8|A0A8I6WPR8_HORVV Mitochondrial-processing peptidase subunit alpha OS=Hordeum vulgare subsp. vulgare OX=112509 PE=4 SV=1	4.01686	3.20843	0.436361	0.798741	-0.554224
A0A8I6WPS2	>tr|A0A8I6WPS2|A0A8I6WPS2_HORVV Aldose 1-epimerase OS=Hordeum vulgare subsp. vulgare OX=112509 PE=3 SV=1	1.16173	1.37597	0.673145	1.18441	0.417411
A0A8I6WPS5	>tr|A0A8I6WPS5|A0A8I6WPS5_HORVV TauD/TfdA-like domain-containing protein OS=Hordeum vulgare subsp. vulgare OX=112509 PE=4 SV=1	1.50445	1.1067	0.290359	0.735616	-0.757272
A0A8I6WPT5	>tr|A0A8I6WPT5|A0A8I6WPT5_HORVV NAD(P)-binding domain-containing protein OS=Hordeum vulgare subsp. vulgare OX=112509 PE=4 SV=1	0.420903	0.293426	0.373212	0.697134	-0.889788
A0A8I6WPT8	>tr|A0A8I6WPT8|A0A8I6WPT8_HORVV anthranilate synthase OS=Hordeum vulgare subsp. vulgare OX=112509 PE=4 SV=1	0.644759	0.533202	0.180403	0.826978	-0.46854
A0A8I6WPU3	>tr|A0A8I6WPU3|A0A8I6WPU3_HORVV DUF538 family protein OS=Hordeum vulgare subsp. vulgare OX=112509 PE=4 SV=1	0.562629	0.486784	0.323095	0.865195	-0.357121
A0A8I6WPV1	>tr|A0A8I6WPV1|A0A8I6WPV1_HORVV UBC core domain-containing protein OS=Hordeum vulgare subsp. vulgare OX=112509 PE=3 SV=1	0.566477	0.472931	0.378491	0.834864	-0.445133
A0A8I6WPY9	>tr|A0A8I6WPY9|A0A8I6WPY9_HORVV Stress-response A/B barrel domain-containing protein OS=Hordeum vulgare subsp. vulgare OX=112509 PE=4 SV=1	3.23658	2.05288	0.100393	0.634274	-1.12284
A0A8I6WPZ0	>tr|A0A8I6WPZ0|A0A8I6WPZ0_HORVV Beta-1,4-mannosyl-glycoprotein 4-beta-N-acetylglucosaminyltransferase OS=Hordeum vulgare subsp. vulgare OX=112509 PE=4 SV=1	0.526168	0.38879	0.470946	0.738908	-0.746257
A0A8I6WPZ1	>tr|A0A8I6WPZ1|A0A8I6WPZ1_HORVV PPPDE domain-containing protein OS=Hordeum vulgare subsp. vulgare OX=112509 PE=3 SV=1	0.49509	0.320988	0.197344	0.648343	-1.06874
A0A8I6WPZ6	>tr|A0A8I6WPZ6|A0A8I6WPZ6_HORVV valine--tRNA ligase OS=Hordeum vulgare subsp. vulgare OX=112509 PE=3 SV=1	2.16003	1.68716	0.16377	0.781078	-0.609374
A0A8I6WQ13	>tr|A0A8I6WQ13|A0A8I6WQ13_HORVV Ubiquitin carboxyl-terminal hydrolase OS=Hordeum vulgare subsp. vulgare OX=112509 PE=3 SV=1	3.694	4.26066	0.872874	1.1534	0.351977
A0A8I6WQ57	>tr|A0A8I6WQ57|A0A8I6WQ57_HORVV Bet v I/Major latex protein domain-containing protein OS=Hordeum vulgare subsp. vulgare OX=112509 PE=4 SV=1	2.58964	3.1715	0.239234	1.22469	0.499884
A0A8I6WQ76	>tr|A0A8I6WQ76|A0A8I6WQ76_HORVV tRNA/rRNA methyltransferase SpoU type domain-containing protein OS=Hordeum vulgare subsp. vulgare OX=112509 PE=4 SV=1	0.702114	0.708811	0.93875	1.00954	0.023415
A0A8I6WQA0	>tr|A0A8I6WQA0|A0A8I6WQA0_HORVV Pentacotripeptide-repeat region of PRORP domain-containing protein OS=Hordeum vulgare subsp. vulgare OX=112509 PE=4 SV=1	0.943426	0.991797	0.821821	1.05127	0.123318
A0A8I6WQB7	>tr|A0A8I6WQB7|A0A8I6WQB7_HORVV RRM domain-containing protein OS=Hordeum vulgare subsp. vulgare OX=112509 PE=3 SV=1	0.835722	0.460691	0.216156	0.551249	-1.46885
A0A8I6WQG0	>tr|A0A8I6WQG0|A0A8I6WQG0_HORVV PH domain-containing protein OS=Hordeum vulgare subsp. vulgare OX=112509 PE=3 SV=1	0.500994	1.09144	0.15539	2.17855	1.92041
A0A8I6WQI8	>tr|A0A8I6WQI8|A0A8I6WQI8_HORVV Autophagy-related protein 3 OS=Hordeum vulgare subsp. vulgare OX=112509 PE=3 SV=1	0.87527	1.04749	0.549045	1.19676	0.442993
A0A8I6WQK2	>tr|A0A8I6WQK2|A0A8I6WQK2_HORVV Histone H2B OS=Hordeum vulgare subsp. vulgare OX=112509 PE=3 SV=1	0.345174	0.477035	0.245544	1.38201	0.797946
A0A8I6WQM2	>tr|A0A8I6WQM2|A0A8I6WQM2_HORVV Amine oxidase OS=Hordeum vulgare subsp. vulgare OX=112509 PE=3 SV=1	0.78108	0.755561	0.933259	0.967329	-0.0819229
A0A8I6WQU6	>tr|A0A8I6WQU6|A0A8I6WQU6_HORVV RanBD1 domain-containing protein OS=Hordeum vulgare subsp. vulgare OX=112509 PE=4 SV=1	3.56798	3.38228	0.635887	0.947954	-0.131822
A0A8I6WQV8	>tr|A0A8I6WQV8|A0A8I6WQV8_HORVV arginine--tRNA ligase OS=Hordeum vulgare subsp. vulgare OX=112509 PE=3 SV=1	0.680148	1.43423	0.187842	2.10871	1.84005
A0A8I6WR09	>tr|A0A8I6WR09|A0A8I6WR09_HORVV Peptidase S59 domain-containing protein OS=Hordeum vulgare subsp. vulgare OX=112509 PE=3 SV=1	0.609715	0.404121	0.366102	0.662803	-1.01433
A0A8I6WR25	>tr|A0A8I6WR25|A0A8I6WR25_HORVV J domain-containing protein OS=Hordeum vulgare subsp. vulgare OX=112509 PE=4 SV=1	2.43026	2.03188	0.483307	0.836076	-0.441557
A0A8I6WR28	>tr|A0A8I6WR28|A0A8I6WR28_HORVV Uncharacterized protein OS=Hordeum vulgare subsp. vulgare OX=112509 PE=3 SV=1	2.15386	1.92528	0.38955	0.893873	-0.276698
A0A8I6WR46	>tr|A0A8I6WR46|A0A8I6WR46_HORVV GH18 domain-containing protein OS=Hordeum vulgare subsp. vulgare OX=112509 PE=4 SV=1	5.31299	4.28227	0.272642	0.805999	-0.531913
A0A8I6WR69	>tr|A0A8I6WR69|A0A8I6WR69_HORVV Myb-like domain-containing protein OS=Hordeum vulgare subsp. vulgare OX=112509 PE=4 SV=1	0.911088	0.852436	0.764256	0.935624	-0.164111
A0A8I6WR75	>tr|A0A8I6WR75|A0A8I6WR75_HORVV Phospholipid/glycerol acyltransferase domain-containing protein OS=Hordeum vulgare subsp. vulgare OX=112509 PE=3 SV=1	0.540559	0.405072	0.351514	0.749358	-0.711624
A0A8I6WR80	>tr|A0A8I6WR80|A0A8I6WR80_HORVV hydroxymethylglutaryl-CoA lyase OS=Hordeum vulgare subsp. vulgare OX=112509 PE=3 SV=1	0.604578	0.571413	0.676367	0.945143	-0.139147
A0A8I6WRC9	>tr|A0A8I6WRC9|A0A8I6WRC9_HORVV Coatomer subunit beta OS=Hordeum vulgare subsp. vulgare OX=112509 PE=4 SV=1	3.09247	1.76653	0.162596	0.571236	-1.38101
A0A8I6WRE0	>tr|A0A8I6WRE0|A0A8I6WRE0_HORVV Pentacotripeptide-repeat region of PRORP domain-containing protein OS=Hordeum vulgare subsp. vulgare OX=112509 PE=3 SV=1	0.56011	0.598886	0.652173	1.06923	0.16509
A0A8I6WRF0	>tr|A0A8I6WRF0|A0A8I6WRF0_HORVV Pentacotripeptide-repeat region of PRORP domain-containing protein OS=Hordeum vulgare subsp. vulgare OX=112509 PE=4 SV=1	0.659127	0.675741	0.874942	1.02521	0.0613932
A0A8I6WRG9	>tr|A0A8I6WRG9|A0A8I6WRG9_HORVV HIG1 domain-containing protein OS=Hordeum vulgare subsp. vulgare OX=112509 PE=4 SV=1	1.13604	0.959921	0.279057	0.844972	-0.415454
A0A8I6WRI3	>tr|A0A8I6WRI3|A0A8I6WRI3_HORVV Glycosyltransferase OS=Hordeum vulgare subsp. vulgare OX=112509 PE=3 SV=1	0.732986	0.93765	0.639633	1.27922	0.607329
A0A8I6WRJ2	>tr|A0A8I6WRJ2|A0A8I6WRJ2_HORVV procollagen-proline 4-dioxygenase OS=Hordeum vulgare subsp. vulgare OX=112509 PE=3 SV=1	0.50184	0.376642	0.301563	0.750522	-0.707796
A0A8I6WRK8	>tr|A0A8I6WRK8|A0A8I6WRK8_HORVV Uncharacterized protein OS=Hordeum vulgare subsp. vulgare OX=112509 PE=3 SV=1	0.654186	0.607664	0.400402	0.928885	-0.18194
A0A8I6WRW3	>tr|A0A8I6WRW3|A0A8I6WRW3_HORVV Inosine triphosphate pyrophosphatase OS=Hordeum vulgare subsp. vulgare OX=112509 PE=3 SV=1	2.08403	1.84622	0.400316	0.885891	-0.298821
A0A8I6WRY5	>tr|A0A8I6WRY5|A0A8I6WRY5_HORVV Peptidyl-prolyl cis-trans isomerase OS=Hordeum vulgare subsp. vulgare OX=112509 PE=3 SV=1	0.91567	0.722657	0.0234402	0.789211	-0.583828
A0A8I6WRY7	>tr|A0A8I6WRY7|A0A8I6WRY7_HORVV Gamma carbonic anhydrase OS=Hordeum vulgare subsp. vulgare OX=112509 PE=3 SV=1	1.39399	2.80819	0.0333656	2.0145	1.72733
A0A8I6WS08	>tr|A0A8I6WS08|A0A8I6WS08_HORVV Xylulose kinase OS=Hordeum vulgare subsp. vulgare OX=112509 PE=3 SV=1	0.732002	0.705339	0.88943	0.963575	-0.0915132
A0A8I6WS23	>tr|A0A8I6WS23|A0A8I6WS23_HORVV chitinase OS=Hordeum vulgare subsp. vulgare OX=112509 PE=4 SV=1	0.794154	0.867072	0.611225	1.09182	0.21665
A0A8I6WS25	>tr|A0A8I6WS25|A0A8I6WS25_HORVV ARID domain-containing protein OS=Hordeum vulgare subsp. vulgare OX=112509 PE=3 SV=1	0.584644	0.360406	0.137769	0.616453	-1.19313
A0A8I6WS34	>tr|A0A8I6WS34|A0A8I6WS34_HORVV NFACT RNA-binding domain-containing protein OS=Hordeum vulgare subsp. vulgare OX=112509 PE=3 SV=1	2.02452	2.2163	0.690564	1.09473	0.223219
A0A8I6WS41	>tr|A0A8I6WS41|A0A8I6WS41_HORVV GRIP domain-containing protein OS=Hordeum vulgare subsp. vulgare OX=112509 PE=4 SV=1	0.940193	0.870606	0.529328	0.925987	-0.189647
A0A8I6WS69	>tr|A0A8I6WS69|A0A8I6WS69_HORVV Beta-adaptin-like protein OS=Hordeum vulgare subsp. vulgare OX=112509 PE=3 SV=1	0.587614	0.341607	0.152351	0.581347	-1.33774
A0A8I6WS70	>tr|A0A8I6WS70|A0A8I6WS70_HORVV Uncharacterized protein OS=Hordeum vulgare subsp. vulgare OX=112509 PE=3 SV=1	0.44063	0.485615	0.679804	1.10209	0.23975
A0A8I6WS72	>tr|A0A8I6WS72|A0A8I6WS72_HORVV Ferredoxin--NADP reductase, chloroplastic OS=Hordeum vulgare subsp. vulgare OX=112509 PE=3 SV=1	0.39194	0.471916	0.424154	1.20405	0.457977
A0A8I6WS80	>tr|A0A8I6WS80|A0A8I6WS80_HORVV pectinesterase OS=Hordeum vulgare subsp. vulgare OX=112509 PE=3 SV=1	0.93555	1.26059	0.4523	1.34743	0.735456
A0A8I6WSA3	>tr|A0A8I6WSA3|A0A8I6WSA3_HORVV PX domain-containing protein OS=Hordeum vulgare subsp. vulgare OX=112509 PE=4 SV=1	0.768318	0.745765	0.846332	0.970647	-0.0734781
A0A8I6WSD4	>tr|A0A8I6WSD4|A0A8I6WSD4_HORVV Sucrose synthase OS=Hordeum vulgare subsp. vulgare OX=112509 PE=3 SV=1	11.072	9.70368	0.046937	0.876416	-0.325341
A0A8I6WSE4	>tr|A0A8I6WSE4|A0A8I6WSE4_HORVV PWWP domain-containing protein OS=Hordeum vulgare subsp. vulgare OX=112509 PE=4 SV=1	0.619	0.548497	0.286706	0.886103	-0.298231
A0A8I6WSJ7	>tr|A0A8I6WSJ7|A0A8I6WSJ7_HORVV Protein kinase domain-containing protein OS=Hordeum vulgare subsp. vulgare OX=112509 PE=4 SV=1	0.83884	0.761789	0.213233	0.908146	-0.237629
A0A8I6WSL2	>tr|A0A8I6WSL2|A0A8I6WSL2_HORVV Malic enzyme OS=Hordeum vulgare subsp. vulgare OX=112509 PE=3 SV=1	0.283815	0.412906	0.439715	1.45484	0.924607
A0A8I6WSM1	>tr|A0A8I6WSM1|A0A8I6WSM1_HORVV THAP4-like heme-binding beta-barrel domain-containing protein OS=Hordeum vulgare subsp. vulgare OX=112509 PE=4 SV=1	0.454154	0.567403	0.496706	1.24936	0.549079
A0A8I6WSS0	>tr|A0A8I6WSS0|A0A8I6WSS0_HORVV Interferon-related developmental regulator N-terminal domain-containing protein OS=Hordeum vulgare subsp. vulgare OX=112509 PE=3 SV=1	0.419186	0.313749	0.471813	0.748473	-0.714539
A0A8I6WSU8	>tr|A0A8I6WSU8|A0A8I6WSU8_HORVV phosphoethanolamine N-methyltransferase OS=Hordeum vulgare subsp. vulgare OX=112509 PE=4 SV=1	0.695621	0.492682	0.304096	0.708262	-0.850728
A0A8I6WSV9	>tr|A0A8I6WSV9|A0A8I6WSV9_HORVV VIP1 protein OS=Hordeum vulgare subsp. vulgare OX=112509 PE=4 SV=1	6.19549	5.03251	0.100887	0.812287	-0.512748
A0A8I6WSY6	>tr|A0A8I6WSY6|A0A8I6WSY6_HORVV ENTH domain-containing protein OS=Hordeum vulgare subsp. vulgare OX=112509 PE=4 SV=1	0.8142	0.731607	0.511751	0.898559	-0.263804
A0A8I6WT04	>tr|A0A8I6WT04|A0A8I6WT04_HORVV Insulin degrading enzyme OS=Hordeum vulgare subsp. vulgare OX=112509 PE=3 SV=1	0.773626	0.815334	0.688584	1.05391	0.129506
A0A8I6WT13	>tr|A0A8I6WT13|A0A8I6WT13_HORVV Uncharacterized protein OS=Hordeum vulgare subsp. vulgare OX=112509 PE=3 SV=1	0.644183	0.767293	0.162119	1.19111	0.431321
A0A8I6WT14	>tr|A0A8I6WT14|A0A8I6WT14_HORVV AB hydrolase-1 domain-containing protein OS=Hordeum vulgare subsp. vulgare OX=112509 PE=4 SV=1	0.954924	0.811117	0.430986	0.849405	-0.402548
A0A8I6WT28	>tr|A0A8I6WT28|A0A8I6WT28_HORVV Histidinol dehydrogenase, chloroplastic OS=Hordeum vulgare subsp. vulgare OX=112509 PE=3 SV=1	0.818794	1.70275	0.204914	2.07958	1.80574
A0A8I6WT53	>tr|A0A8I6WT53|A0A8I6WT53_HORVV Alpha-galactosidase OS=Hordeum vulgare subsp. vulgare OX=112509 PE=3 SV=1	0.672661	0.601792	0.356121	0.894643	-0.274575
A0A8I6WT86	>tr|A0A8I6WT86|A0A8I6WT86_HORVV Aminotransferase class V domain-containing protein OS=Hordeum vulgare subsp. vulgare OX=112509 PE=4 SV=1	3.37576	2.22895	0.281928	0.660281	-1.02374
A0A8I6WT94	>tr|A0A8I6WT94|A0A8I6WT94_HORVV Sphingomyelin synthase-like domain-containing protein OS=Hordeum vulgare subsp. vulgare OX=112509 PE=3 SV=1	0.735591	0.644042	0.604108	0.875542	-0.327801
A0A8I6WTE6	>tr|A0A8I6WTE6|A0A8I6WTE6_HORVV Serine protease OS=Hordeum vulgare subsp. vulgare OX=112509 PE=3 SV=1	0.668606	0.773442	0.830815	1.1568	0.359231
A0A8I6WTG0	>tr|A0A8I6WTG0|A0A8I6WTG0_HORVV Uncharacterized protein OS=Hordeum vulgare subsp. vulgare OX=112509 PE=3 SV=1	0.63899	0.539149	0.299593	0.843753	-0.419015
A0A8I6WTH7	>tr|A0A8I6WTH7|A0A8I6WTH7_HORVV UBX domain-containing protein OS=Hordeum vulgare subsp. vulgare OX=112509 PE=4 SV=1	2.81338	1.14807	0.232103	0.408075	-2.21056
A0A8I6WTI3	>tr|A0A8I6WTI3|A0A8I6WTI3_HORVV Succinate dehydrogenase subunit 3 OS=Hordeum vulgare subsp. vulgare OX=112509 PE=4 SV=1	0.670002	0.529392	0.109452	0.790134	-0.580944
A0A8I6WTJ0	>tr|A0A8I6WTJ0|A0A8I6WTJ0_HORVV Thioredoxin domain-containing protein OS=Hordeum vulgare subsp. vulgare OX=112509 PE=4 SV=1	0.383495	0.776576	0.260229	2.025	1.74015
A0A8I6WTN3	>tr|A0A8I6WTN3|A0A8I6WTN3_HORVV Uncharacterized protein OS=Hordeum vulgare subsp. vulgare OX=112509 PE=4 SV=1	0.650011	0.586725	0.366371	0.902638	-0.252634
A0A8I6WTQ5	>tr|A0A8I6WTQ5|A0A8I6WTQ5_HORVV Uncharacterized protein OS=Hordeum vulgare subsp. vulgare OX=112509 PE=3 SV=1	1.26218	1.55481	0.679123	1.23185	0.514261
A0A8I6WTQ8	>tr|A0A8I6WTQ8|A0A8I6WTQ8_HORVV Arf-GAP domain-containing protein OS=Hordeum vulgare subsp. vulgare OX=112509 PE=4 SV=1	1.63263	1.40446	0.0700729	0.860244	-0.371276
A0A8I6WTT5	>tr|A0A8I6WTT5|A0A8I6WTT5_HORVV Ribosomal protein L15 OS=Hordeum vulgare subsp. vulgare OX=112509 PE=3 SV=1	14.0151	10.8812	0.0379136	0.776389	-0.624226
A0A8I6WTW1	>tr|A0A8I6WTW1|A0A8I6WTW1_HORVV C2 and GRAM domain-containing protein OS=Hordeum vulgare subsp. vulgare OX=112509 PE=4 SV=1	0.743423	0.797692	0.332588	1.073	0.17377
A0A8I6WTW5	>tr|A0A8I6WTW5|A0A8I6WTW5_HORVV Outer envelope protein 61 OS=Hordeum vulgare subsp. vulgare OX=112509 PE=4 SV=1	2.3442	1.83082	0.566209	0.780997	-0.609632
A0A8I6WTW9	>tr|A0A8I6WTW9|A0A8I6WTW9_HORVV EF-hand domain-containing protein OS=Hordeum vulgare subsp. vulgare OX=112509 PE=4 SV=1	0.474524	0.402397	0.612065	0.848001	-0.406627
A0A8I6WTX7	>tr|A0A8I6WTX7|A0A8I6WTX7_HORVV Uncharacterized protein OS=Hordeum vulgare subsp. vulgare OX=112509 PE=3 SV=1	1.30991	1.35084	0.947991	1.03124	0.0758751
A0A8I6WU16	>tr|A0A8I6WU16|A0A8I6WU16_HORVV Pentatricopeptide repeat-containing protein OS=Hordeum vulgare subsp. vulgare OX=112509 PE=3 SV=1	0.567221	0.588162	0.721156	1.03692	0.0894114
A0A8I6WU27	>tr|A0A8I6WU27|A0A8I6WU27_HORVV Ribosome-recycling factor, chloroplastic OS=Hordeum vulgare subsp. vulgare OX=112509 PE=3 SV=1	0.61575	1.12466	0.14087	1.82649	1.48569
A0A8I6WU34	>tr|A0A8I6WU34|A0A8I6WU34_HORVV BHLH domain-containing protein OS=Hordeum vulgare subsp. vulgare OX=112509 PE=3 SV=1	0.379916	0.282287	0.146543	0.743024	-0.732559
A0A8I6WU73	>tr|A0A8I6WU73|A0A8I6WU73_HORVV EF-hand domain-containing protein OS=Hordeum vulgare subsp. vulgare OX=112509 PE=4 SV=1	4.39411	4.92737	0.781115	1.12136	0.282491
A0A8I6WUE9	>tr|A0A8I6WUE9|A0A8I6WUE9_HORVV UDP-glucuronate decarboxylase OS=Hordeum vulgare subsp. vulgare OX=112509 PE=3 SV=1	1.18635	1.18838	0.995972	1.00171	0.00421791
A0A8I6WUI4	>tr|A0A8I6WUI4|A0A8I6WUI4_HORVV TATA element modulatory factor 1 TATA binding domain-containing protein OS=Hordeum vulgare subsp. vulgare OX=112509 PE=4 SV=1	0.802004	0.794089	0.973535	0.99013	-0.0244628
A0A8I6WUK1	>tr|A0A8I6WUK1|A0A8I6WUK1_HORVV Eukaryotic translation initiation factor 3 subunit H OS=Hordeum vulgare subsp. vulgare OX=112509 PE=3 SV=1	1.15165	1.55796	0.27823	1.3528	0.745268
A0A8I6WUL4	>tr|A0A8I6WUL4|A0A8I6WUL4_HORVV BolA-like protein OS=Hordeum vulgare subsp. vulgare OX=112509 PE=3 SV=1	0.654702	0.423749	0.235805	0.647241	-1.07293
A0A8I6WUL6	>tr|A0A8I6WUL6|A0A8I6WUL6_HORVV CBS domain-containing protein OS=Hordeum vulgare subsp. vulgare OX=112509 PE=4 SV=1	0.595755	0.946187	0.300006	1.58822	1.14094
A0A8I6WUM3	>tr|A0A8I6WUM3|A0A8I6WUM3_HORVV Uncharacterized protein OS=Hordeum vulgare subsp. vulgare OX=112509 PE=4 SV=1	2.81982	2.85482	0.965124	1.01241	0.0304211
A0A8I6WUM9	>tr|A0A8I6WUM9|A0A8I6WUM9_HORVV Transmembrane protein OS=Hordeum vulgare subsp. vulgare OX=112509 PE=4 SV=1	1.6651	1.53256	0.599635	0.920404	-0.204562
A0A8I6WUN5	>tr|A0A8I6WUN5|A0A8I6WUN5_HORVV Dienelactone hydrolase domain-containing protein OS=Hordeum vulgare subsp. vulgare OX=112509 PE=4 SV=1	1.36848	1.10589	0.612842	0.808118	-0.525439
A0A8I6WUP0	>tr|A0A8I6WUP0|A0A8I6WUP0_HORVV SNARE-complex protein Syntaxin-18 N-terminal domain-containing protein OS=Hordeum vulgare subsp. vulgare OX=112509 PE=3 SV=1	1.12344	0.927046	0.473531	0.825185	-0.473893
A0A8I6WUT0	>tr|A0A8I6WUT0|A0A8I6WUT0_HORVV CASP-like protein OS=Hordeum vulgare subsp. vulgare OX=112509 PE=3 SV=1	0.627572	0.601013	0.748232	0.95768	-0.106646
A0A8I6WUT1	>tr|A0A8I6WUT1|A0A8I6WUT1_HORVV Desiccation-related protein PCC13-62 OS=Hordeum vulgare subsp. vulgare OX=112509 PE=4 SV=1	5.80998	5.10715	0.319536	0.879031	-0.317994
A0A8I6WV02	>tr|A0A8I6WV02|A0A8I6WV02_HORVV Iron-sulfur cluster assembly protein OS=Hordeum vulgare subsp. vulgare OX=112509 PE=3 SV=1	0.882988	0.493147	0.0848727	0.558498	-1.43663
A0A8I6WV37	>tr|A0A8I6WV37|A0A8I6WV37_HORVV H15 domain-containing protein OS=Hordeum vulgare subsp. vulgare OX=112509 PE=3 SV=1	0.656238	0.563345	0.15358	0.858447	-0.376434
A0A8I6WV42	>tr|A0A8I6WV42|A0A8I6WV42_HORVV Bifunctional inhibitor/plant lipid transfer protein/seed storage helical domain-containing protein OS=Hordeum vulgare subsp. vulgare OX=112509 PE=3 SV=1	7.68059	7.80262	0.853704	1.01589	0.0388766
A0A8I6WV82	>tr|A0A8I6WV82|A0A8I6WV82_HORVV Oleosin OS=Hordeum vulgare subsp. vulgare OX=112509 PE=3 SV=1	16.7502	13.7042	0.161957	0.818152	-0.495006
A0A8I6WVA9	>tr|A0A8I6WVA9|A0A8I6WVA9_HORVV Uncharacterized protein OS=Hordeum vulgare subsp. vulgare OX=112509 PE=4 SV=1	4.98801	5.12883	0.897414	1.02823	0.0686645
A0A8I6WVC5	>tr|A0A8I6WVC5|A0A8I6WVC5_HORVV Prenylcysteine lyase domain-containing protein OS=Hordeum vulgare subsp. vulgare OX=112509 PE=3 SV=1	0.779108	0.663114	0.379926	0.85112	-0.397573
A0A8I6WVD2	>tr|A0A8I6WVD2|A0A8I6WVD2_HORVV Glutathione hydrolase OS=Hordeum vulgare subsp. vulgare OX=112509 PE=4 SV=1	0.56357	0.469728	0.39167	0.833486	-0.449209
A0A8I6WVI6	>tr|A0A8I6WVI6|A0A8I6WVI6_HORVV Oleosin OS=Hordeum vulgare subsp. vulgare OX=112509 PE=3 SV=1	17.7216	15.473	0.411016	0.873113	-0.334653
A0A8I6WVP0	>tr|A0A8I6WVP0|A0A8I6WVP0_HORVV Small ubiquitin-related modifier OS=Hordeum vulgare subsp. vulgare OX=112509 PE=3 SV=1	4.38585	4.1697	0.917151	0.950718	-0.124642
A0A8I6WVQ0	>tr|A0A8I6WVQ0|A0A8I6WVQ0_HORVV Acyl-[acyl-carrier-protein] desaturase OS=Hordeum vulgare subsp. vulgare OX=112509 PE=3 SV=1	3.91814	3.64853	0.903444	0.931189	-0.17583
A0A8I6WVR6	>tr|A0A8I6WVR6|A0A8I6WVR6_HORVV Mitochondrial import receptor subunit TOM20 OS=Hordeum vulgare subsp. vulgare OX=112509 PE=3 SV=1	3.25217	2.63763	0.14302	0.811039	-0.51654
A0A8I6WVS2	>tr|A0A8I6WVS2|A0A8I6WVS2_HORVV Calcium-transporting ATPase OS=Hordeum vulgare subsp. vulgare OX=112509 PE=3 SV=1	0.671703	0.562028	0.309098	0.836722	-0.439651
A0A8I6WVV8	>tr|A0A8I6WVV8|A0A8I6WVV8_HORVV ENTH domain-containing protein OS=Hordeum vulgare subsp. vulgare OX=112509 PE=4 SV=1	0.439341	1.62811	0.0539556	3.70579	3.2306
A0A8I6WVW5	>tr|A0A8I6WVW5|A0A8I6WVW5_HORVV 4-hydroxy-7-methoxy-3-oxo-3,4-dihydro-2H-1,4-benzoxazin-2-yl glucosidebeta-D-glucosidase OS=Hordeum vulgare subsp. vulgare OX=112509 PE=3 SV=1	0.857564	0.781112	0.189142	0.910849	-0.230298
A0A8I6WVX4	>tr|A0A8I6WVX4|A0A8I6WVX4_HORVV Isocitrate lyase OS=Hordeum vulgare subsp. vulgare OX=112509 PE=4 SV=1	0.947777	1.06109	0.582838	1.11956	0.278536
A0A8I6WVY4	>tr|A0A8I6WVY4|A0A8I6WVY4_HORVV Eukaryotic translation initiation factor 5B OS=Hordeum vulgare subsp. vulgare OX=112509 PE=3 SV=1	2.12388	1.11204	0.0337628	0.523591	-1.59581
A0A8I6WVY7	>tr|A0A8I6WVY7|A0A8I6WVY7_HORVV WD repeat domain phosphoinositide-interacting protein 3 OS=Hordeum vulgare subsp. vulgare OX=112509 PE=3 SV=1	0.567001	0.521814	0.532475	0.920306	-0.204825
A0A8I6WVZ1	>tr|A0A8I6WVZ1|A0A8I6WVZ1_HORVV RNA helicase OS=Hordeum vulgare subsp. vulgare OX=112509 PE=4 SV=1	3.50628	1.64374	0.00586689	0.4688	-1.86842
A0A8I6WVZ6	>tr|A0A8I6WVZ6|A0A8I6WVZ6_HORVV inorganic diphosphatase OS=Hordeum vulgare subsp. vulgare OX=112509 PE=3 SV=1	0.391425	0.406409	0.927252	1.03828	0.0926472
A0A8I6WW12	>tr|A0A8I6WW12|A0A8I6WW12_HORVV NAD(P)-binding domain-containing protein OS=Hordeum vulgare subsp. vulgare OX=112509 PE=3 SV=1	0.723285	0.709767	0.695162	0.98131	-0.046531
A0A8I6WW27	>tr|A0A8I6WW27|A0A8I6WW27_HORVV Uncharacterized protein OS=Hordeum vulgare subsp. vulgare OX=112509 PE=4 SV=1	0.810202	0.669409	0.602933	0.826226	-0.470786
A0A8I6WW44	>tr|A0A8I6WW44|A0A8I6WW44_HORVV GDSL esterase/lipase OS=Hordeum vulgare subsp. vulgare OX=112509 PE=3 SV=1	0.489431	0.559445	0.475483	1.14305	0.329748
A0A8I6WW51	>tr|A0A8I6WW51|A0A8I6WW51_HORVV Glycosyltransferase family 28 N-terminal domain-containing protein OS=Hordeum vulgare subsp. vulgare OX=112509 PE=4 SV=1	0.626968	0.527384	0.40317	0.841167	-0.426586
A0A8I6WW82	>tr|A0A8I6WW82|A0A8I6WW82_HORVV Major facilitator superfamily (MFS) profile domain-containing protein OS=Hordeum vulgare subsp. vulgare OX=112509 PE=3 SV=1	0.495349	0.835672	0.221446	1.68704	1.28981
A0A8I6WWA9	>tr|A0A8I6WWA9|A0A8I6WWA9_HORVV MSP domain-containing protein OS=Hordeum vulgare subsp. vulgare OX=112509 PE=3 SV=1	0.630193	0.560548	0.294112	0.889487	-0.28883
A0A8I6WWC5	>tr|A0A8I6WWC5|A0A8I6WWC5_HORVV Protein CutA, chloroplastic OS=Hordeum vulgare subsp. vulgare OX=112509 PE=3 SV=1	2.44248	2.09773	0.303848	0.858853	-0.375268
A0A8I6WWD2	>tr|A0A8I6WWD2|A0A8I6WWD2_HORVV S-formylglutathione hydrolase OS=Hordeum vulgare subsp. vulgare OX=112509 PE=3 SV=1	0.446737	0.291513	0.0489267	0.652538	-1.05283
A0A8I6WWH2	>tr|A0A8I6WWH2|A0A8I6WWH2_HORVV X8 domain-containing protein OS=Hordeum vulgare subsp. vulgare OX=112509 PE=4 SV=1	0.588068	0.587411	0.992145	0.998883	-0.00275681
A0A8I6WWJ7	>tr|A0A8I6WWJ7|A0A8I6WWJ7_HORVV 4-hydroxy-tetrahydrodipicolinate synthase OS=Hordeum vulgare subsp. vulgare OX=112509 PE=3 SV=1	0.853803	0.721096	0.0657766	0.84457	-0.416628
A0A8I6WWP8	>tr|A0A8I6WWP8|A0A8I6WWP8_HORVV Aspergillus nuclease S1 OS=Hordeum vulgare subsp. vulgare OX=112509 PE=3 SV=1	0.677735	0.628814	0.482213	0.927817	-0.184777
A0A8I6WWW2	>tr|A0A8I6WWW2|A0A8I6WWW2_HORVV Dihydrolipoamide acetyltransferase component of pyruvate dehydrogenase complex OS=Hordeum vulgare subsp. vulgare OX=112509 PE=3 SV=1	0.992592	0.981127	0.986376	0.988449	-0.0286538
A0A8I6WWX2	>tr|A0A8I6WWX2|A0A8I6WWX2_HORVV Uncharacterized protein OS=Hordeum vulgare subsp. vulgare OX=112509 PE=4 SV=1	11.9138	14.7339	0.649864	1.23671	0.523976
A0A8I6WWX5	>tr|A0A8I6WWX5|A0A8I6WWX5_HORVV UDP-N-acetylglucosamine diphosphorylase 2 OS=Hordeum vulgare subsp. vulgare OX=112509 PE=4 SV=1	0.61516	0.381193	0.332024	0.619666	-1.18031
A0A8I6WX78	>tr|A0A8I6WX78|A0A8I6WX78_HORVV Translation machinery-associated protein 22 OS=Hordeum vulgare subsp. vulgare OX=112509 PE=3 SV=1	2.09635	1.74974	0.259062	0.834661	-0.445735
A0A8I6WX82	>tr|A0A8I6WX82|A0A8I6WX82_HORVV Signal recognition particle 14 kDa protein OS=Hordeum vulgare subsp. vulgare OX=112509 PE=3 SV=1	0.549324	0.543592	0.917602	0.989567	-0.0258667
A0A8I6WX95	>tr|A0A8I6WX95|A0A8I6WX95_HORVV 4-coumarate--CoA ligase OS=Hordeum vulgare subsp. vulgare OX=112509 PE=3 SV=1	1.13004	1.05795	0.554983	0.936205	-0.162582
A0A8I6WX99	>tr|A0A8I6WX99|A0A8I6WX99_HORVV RRM domain-containing protein OS=Hordeum vulgare subsp. vulgare OX=112509 PE=4 SV=1	0.481558	0.348907	0.375804	0.724537	-0.7947
A0A8I6WXB4	>tr|A0A8I6WXB4|A0A8I6WXB4_HORVV Peroxisome biogenesis protein 22 OS=Hordeum vulgare subsp. vulgare OX=112509 PE=4 SV=1	0.471227	0.413747	0.630551	0.87802	-0.320832
A0A8I6WXB6	>tr|A0A8I6WXB6|A0A8I6WXB6_HORVV Fe2OG dioxygenase domain-containing protein OS=Hordeum vulgare subsp. vulgare OX=112509 PE=3 SV=1	1.49556	1.87352	0.148701	1.25272	0.555706
A0A8I6WXD1	>tr|A0A8I6WXD1|A0A8I6WXD1_HORVV Hyaluronan/mRNA-binding protein domain-containing protein OS=Hordeum vulgare subsp. vulgare OX=112509 PE=4 SV=1	17.8347	12.5045	0.26794	0.701134	-0.875675
A0A8I6WXE8	>tr|A0A8I6WXE8|A0A8I6WXE8_HORVV UspA domain-containing protein OS=Hordeum vulgare subsp. vulgare OX=112509 PE=4 SV=1	0.637474	0.462664	0.365279	0.725777	-0.790481
A0A8I6WXG8	>tr|A0A8I6WXG8|A0A8I6WXG8_HORVV Uncharacterized protein OS=Hordeum vulgare subsp. vulgare OX=112509 PE=3 SV=1	1.17449	0.663091	0.00134147	0.564578	-1.40993
A0A8I6WXH0	>tr|A0A8I6WXH0|A0A8I6WXH0_HORVV Glycosyltransferase OS=Hordeum vulgare subsp. vulgare OX=112509 PE=3 SV=1	0.969201	1.00791	0.674691	1.03994	0.0965871
A0A8I6WXL0	>tr|A0A8I6WXL0|A0A8I6WXL0_HORVV Acireductone dioxygenase OS=Hordeum vulgare subsp. vulgare OX=112509 PE=3 SV=1	0.466569	0.748457	0.20938	1.60417	1.1656
A0A8I6WXQ0	>tr|A0A8I6WXQ0|A0A8I6WXQ0_HORVV RuvB-like helicase OS=Hordeum vulgare subsp. vulgare OX=112509 PE=3 SV=1	0.587314	0.460708	0.528111	0.784433	-0.598805
A0A8I6WXV5	>tr|A0A8I6WXV5|A0A8I6WXV5_HORVV BSD domain-containing protein OS=Hordeum vulgare subsp. vulgare OX=112509 PE=4 SV=1	0.608341	0.549935	0.811013	0.903993	-0.248933
A0A8I6WXW1	>tr|A0A8I6WXW1|A0A8I6WXW1_HORVV Histidine-containing phosphotransfer protein OS=Hordeum vulgare subsp. vulgare OX=112509 PE=4 SV=1	0.595076	0.556139	0.530309	0.934569	-0.166895
A0A8I6WXY2	>tr|A0A8I6WXY2|A0A8I6WXY2_HORVV C2 domain-containing protein OS=Hordeum vulgare subsp. vulgare OX=112509 PE=4 SV=1	0.504988	0.473166	0.606764	0.936985	-0.160526
A0A8I6WXY7	>tr|A0A8I6WXY7|A0A8I6WXY7_HORVV Polygalacturonase OS=Hordeum vulgare subsp. vulgare OX=112509 PE=3 SV=1	0.719099	0.667464	0.353541	0.928194	-0.183775
A0A8I6WY15	>tr|A0A8I6WY15|A0A8I6WY15_HORVV Acidic protein OS=Hordeum vulgare subsp. vulgare OX=112509 PE=3 SV=1	11.1321	10.6514	0.433658	0.956821	-0.108859
A0A8I6WY36	>tr|A0A8I6WY36|A0A8I6WY36_HORVV Glycine-rich protein OS=Hordeum vulgare subsp. vulgare OX=112509 PE=4 SV=1	5.56895	4.34266	0.0650718	0.779799	-0.613418
A0A8I6WY45	>tr|A0A8I6WY45|A0A8I6WY45_HORVV Uncharacterized protein OS=Hordeum vulgare subsp. vulgare OX=112509 PE=4 SV=1	1.4325	1.15268	0.145553	0.804664	-0.536004
A0A8I6WY90	>tr|A0A8I6WY90|A0A8I6WY90_HORVV leucine--tRNA ligase OS=Hordeum vulgare subsp. vulgare OX=112509 PE=3 SV=1	3.00075	2.1712	0.356864	0.723552	-0.798054
A0A8I6WYC1	>tr|A0A8I6WYC1|A0A8I6WYC1_HORVV Reticulon-like protein OS=Hordeum vulgare subsp. vulgare OX=112509 PE=4 SV=1	2.46217	2.25544	0.38804	0.916038	-0.216289
A0A8I6WYC6	>tr|A0A8I6WYC6|A0A8I6WYC6_HORVV Protein kinase domain-containing protein OS=Hordeum vulgare subsp. vulgare OX=112509 PE=3 SV=1	0.558499	0.429799	0.422467	0.769561	-0.646012
A0A8I6WYC9	>tr|A0A8I6WYC9|A0A8I6WYC9_HORVV Serine aminopeptidase S33 domain-containing protein OS=Hordeum vulgare subsp. vulgare OX=112509 PE=4 SV=1	0.743537	0.724912	0.811947	0.974951	-0.0625666
A0A8I6WYH3	>tr|A0A8I6WYH3|A0A8I6WYH3_HORVV SHSP domain-containing protein OS=Hordeum vulgare subsp. vulgare OX=112509 PE=3 SV=1	9.51672	8.375	0.46653	0.88003	-0.315191
A0A8I6WYL2	>tr|A0A8I6WYL2|A0A8I6WYL2_HORVV 14-3-3 domain-containing protein OS=Hordeum vulgare subsp. vulgare OX=112509 PE=3 SV=1	11.8467	11.9684	0.971307	1.01027	0.0251971
A0A8I6WYR6	>tr|A0A8I6WYR6|A0A8I6WYR6_HORVV WD40 repeat-containing protein SMU1 OS=Hordeum vulgare subsp. vulgare OX=112509 PE=3 SV=1	2.50612	2.5918	0.800138	1.03419	0.0829018
A0A8I6WYU4	>tr|A0A8I6WYU4|A0A8I6WYU4_HORVV Oryzain alpha chain OS=Hordeum vulgare subsp. vulgare OX=112509 PE=3 SV=1	1.96591	1.85242	0.388823	0.94227	-0.146654
A0A8I6WYV1	>tr|A0A8I6WYV1|A0A8I6WYV1_HORVV Uncharacterized protein OS=Hordeum vulgare subsp. vulgare OX=112509 PE=4 SV=1	9.21662	8.33875	0.231278	0.904751	-0.246866
A0A8I6WYW6	>tr|A0A8I6WYW6|A0A8I6WYW6_HORVV Uncharacterized protein OS=Hordeum vulgare subsp. vulgare OX=112509 PE=3 SV=1	0.468023	0.547697	0.294722	1.17023	0.387714
A0A8I6WYZ5	>tr|A0A8I6WYZ5|A0A8I6WYZ5_HORVV Uncharacterized protein OS=Hordeum vulgare subsp. vulgare OX=112509 PE=3 SV=1	0.580805	0.577062	0.985581	0.993556	-0.0159432
A0A8I6WZ72	>tr|A0A8I6WZ72|A0A8I6WZ72_HORVV WW domain-containing protein OS=Hordeum vulgare subsp. vulgare OX=112509 PE=4 SV=1	0.598847	0.481263	0.363054	0.803649	-0.539116
A0A8I6WZ78	>tr|A0A8I6WZ78|A0A8I6WZ78_HORVV Fibronectin type III-like domain-containing protein OS=Hordeum vulgare subsp. vulgare OX=112509 PE=4 SV=1	1.11038	0.938504	0.595347	0.845212	-0.414752
A0A8I6WZ80	>tr|A0A8I6WZ80|A0A8I6WZ80_HORVV NADP-dependent oxidoreductase domain-containing protein OS=Hordeum vulgare subsp. vulgare OX=112509 PE=3 SV=1	1.88201	1.25446	0.349535	0.666554	-1.00042
A0A8I6WZ81	>tr|A0A8I6WZ81|A0A8I6WZ81_HORVV pyruvate decarboxylase OS=Hordeum vulgare subsp. vulgare OX=112509 PE=3 SV=1	0.976516	1.70438	0.248185	1.74537	1.37364
A0A8I6WZA5	>tr|A0A8I6WZA5|A0A8I6WZA5_HORVV Fe2OG dioxygenase domain-containing protein OS=Hordeum vulgare subsp. vulgare OX=112509 PE=3 SV=1	0.893504	0.803308	0.331147	0.899054	-0.262446
A0A8I6WZC3	>tr|A0A8I6WZC3|A0A8I6WZC3_HORVV Transmembrane 9 superfamily member OS=Hordeum vulgare subsp. vulgare OX=112509 PE=3 SV=1	0.788326	0.784607	0.972921	0.995283	-0.0116612
A0A8I6WZC4	>tr|A0A8I6WZC4|A0A8I6WZC4_HORVV SHSP domain-containing protein OS=Hordeum vulgare subsp. vulgare OX=112509 PE=3 SV=1	0.587308	0.751197	0.407546	1.27905	0.607003
A0A8I6WZD3	>tr|A0A8I6WZD3|A0A8I6WZD3_HORVV ADP,ATP carrier protein OS=Hordeum vulgare subsp. vulgare OX=112509 PE=3 SV=1	0.900724	1.03396	0.489773	1.14792	0.340227
A0A8I6WZE6	>tr|A0A8I6WZE6|A0A8I6WZE6_HORVV glutathione dehydrogenase (ascorbate) OS=Hordeum vulgare subsp. vulgare OX=112509 PE=3 SV=1	37.226	28.955	0.289312	0.777816	-0.619695
A0A8I6WZJ4	>tr|A0A8I6WZJ4|A0A8I6WZJ4_HORVV 60S ribosomal protein L3 OS=Hordeum vulgare subsp. vulgare OX=112509 PE=3 SV=1	3.8399	3.70566	0.801607	0.965043	-0.0877576
A0A8I6WZV2	>tr|A0A8I6WZV2|A0A8I6WZV2_HORVV Esterase OS=Hordeum vulgare subsp. vulgare OX=112509 PE=3 SV=1	0.600207	0.620327	0.906861	1.03352	0.0813179
A0A8I6WZX6	>tr|A0A8I6WZX6|A0A8I6WZX6_HORVV Peptide-N4-(N-acetyl-beta-glucosaminyl)asparagine amidase A OS=Hordeum vulgare subsp. vulgare OX=112509 PE=4 SV=1	0.537921	0.582397	0.433871	1.08268	0.195922
A0A8I6WZY3	>tr|A0A8I6WZY3|A0A8I6WZY3_HORVV Uncharacterized protein OS=Hordeum vulgare subsp. vulgare OX=112509 PE=4 SV=1	29.1875	26.3629	0.425115	0.903226	-0.251028
A0A8I6WZY4	>tr|A0A8I6WZY4|A0A8I6WZY4_HORVV RRM domain-containing protein OS=Hordeum vulgare subsp. vulgare OX=112509 PE=4 SV=1	0.548026	0.427867	0.489449	0.780743	-0.610434
A0A8I6WZY7	>tr|A0A8I6WZY7|A0A8I6WZY7_HORVV NADH:flavin oxidoreductase/NADH oxidase N-terminal domain-containing protein OS=Hordeum vulgare subsp. vulgare OX=112509 PE=3 SV=1	0.564995	0.442697	0.431864	0.783541	-0.601609
A0A8I6X001	>tr|A0A8I6X001|A0A8I6X001_HORVV cysteine desulfurase OS=Hordeum vulgare subsp. vulgare OX=112509 PE=4 SV=1	0.954687	0.928347	0.785203	0.97241	-0.0690014
A0A8I6X009	>tr|A0A8I6X009|A0A8I6X009_HORVV Uncharacterized protein OS=Hordeum vulgare subsp. vulgare OX=112509 PE=4 SV=1	0.364762	0.427334	0.503163	1.17154	0.390467
A0A8I6X017	>tr|A0A8I6X017|A0A8I6X017_HORVV non-specific serine/threonine protein kinase OS=Hordeum vulgare subsp. vulgare OX=112509 PE=3 SV=1	0.712433	0.773053	0.170445	1.08509	0.201405
A0A8I6X046	>tr|A0A8I6X046|A0A8I6X046_HORVV Uncharacterized protein OS=Hordeum vulgare subsp. vulgare OX=112509 PE=4 SV=1	0.530756	0.613207	0.491269	1.15535	0.356132
A0A8I6X048	>tr|A0A8I6X048|A0A8I6X048_HORVV EF-hand domain-containing protein OS=Hordeum vulgare subsp. vulgare OX=112509 PE=4 SV=1	0.300276	0.369601	0.541017	1.23087	0.512299
A0A8I6X069	>tr|A0A8I6X069|A0A8I6X069_HORVV Peptidase S59 domain-containing protein OS=Hordeum vulgare subsp. vulgare OX=112509 PE=4 SV=1	0.434617	0.843412	0.304969	1.94059	1.63514
A0A8I6X0A5	>tr|A0A8I6X0A5|A0A8I6X0A5_HORVV Arginase OS=Hordeum vulgare subsp. vulgare OX=112509 PE=3 SV=1	1.88707	1.72473	0.381209	0.913969	-0.221865
A0A8I6X0C8	>tr|A0A8I6X0C8|A0A8I6X0C8_HORVV non-reducing end alpha-L-arabinofuranosidase OS=Hordeum vulgare subsp. vulgare OX=112509 PE=3 SV=1	0.601347	0.542901	0.285028	0.902808	-0.252168
A0A8I6X0G0	>tr|A0A8I6X0G0|A0A8I6X0G0_HORVV DJ-1/PfpI domain-containing protein OS=Hordeum vulgare subsp. vulgare OX=112509 PE=3 SV=1	2.20806	1.84877	0.202767	0.837279	-0.438009
A0A8I6X0H1	>tr|A0A8I6X0H1|A0A8I6X0H1_HORVV Charged multivesicular body protein 2a OS=Hordeum vulgare subsp. vulgare OX=112509 PE=3 SV=1	1.67935	1.27491	0.538725	0.759168	-0.679546
A0A8I6X0M3	>tr|A0A8I6X0M3|A0A8I6X0M3_HORVV NAD-dependent epimerase/dehydratase domain-containing protein OS=Hordeum vulgare subsp. vulgare OX=112509 PE=3 SV=1	0.57964	0.415341	0.310758	0.71655	-0.822038
A0A8I6X0M9	>tr|A0A8I6X0M9|A0A8I6X0M9_HORVV TATA-binding protein interacting (TIP20) domain-containing protein OS=Hordeum vulgare subsp. vulgare OX=112509 PE=3 SV=1	0.700699	1.32912	0.323719	1.89686	1.57892
A0A8I6X0Q0	>tr|A0A8I6X0Q0|A0A8I6X0Q0_HORVV HTH La-type RNA-binding domain-containing protein OS=Hordeum vulgare subsp. vulgare OX=112509 PE=4 SV=1	0.637561	0.681386	0.675467	1.06874	0.163956
A0A8I6X0W8	>tr|A0A8I6X0W8|A0A8I6X0W8_HORVV Uncharacterized protein OS=Hordeum vulgare subsp. vulgare OX=112509 PE=3 SV=1	0.902346	0.701387	0.21805	0.777293	-0.621354
A0A8I6X0Y8	>tr|A0A8I6X0Y8|A0A8I6X0Y8_HORVV Thioredoxin domain-containing protein OS=Hordeum vulgare subsp. vulgare OX=112509 PE=4 SV=1	1.41822	0.847719	0.0368807	0.597735	-1.26918
A0A8I6X0Z2	>tr|A0A8I6X0Z2|A0A8I6X0Z2_HORVV Exocyst subunit Exo70 family protein OS=Hordeum vulgare subsp. vulgare OX=112509 PE=3 SV=1	0.752909	0.667327	0.267518	0.886332	-0.297593
A0A8I6X0Z7	>tr|A0A8I6X0Z7|A0A8I6X0Z7_HORVV Uncharacterized protein OS=Hordeum vulgare subsp. vulgare OX=112509 PE=4 SV=1	0.87501	0.784559	0.429953	0.896629	-0.269106
A0A8I6X105	>tr|A0A8I6X105|A0A8I6X105_HORVV ADP-ribosylation factor-like protein 5 OS=Hordeum vulgare subsp. vulgare OX=112509 PE=3 SV=1	0.851528	0.850866	0.995926	0.999222	-0.00191932
A0A8I6X118	>tr|A0A8I6X118|A0A8I6X118_HORVV Mal d 1-associated protein OS=Hordeum vulgare subsp. vulgare OX=112509 PE=4 SV=1	1.25563	1.03963	0.289684	0.827973	-0.465577
A0A8I6X130	>tr|A0A8I6X130|A0A8I6X130_HORVV Phosphoglycerate mutase OS=Hordeum vulgare subsp. vulgare OX=112509 PE=4 SV=1	0.580802	0.863153	0.342984	1.48614	0.977106
A0A8I6X135	>tr|A0A8I6X135|A0A8I6X135_HORVV DUF6598 domain-containing protein OS=Hordeum vulgare subsp. vulgare OX=112509 PE=4 SV=1	0.816666	0.669922	0.0134265	0.820314	-0.488497
A0A8I6X148	>tr|A0A8I6X148|A0A8I6X148_HORVV Prostaglandin E synthase 2 OS=Hordeum vulgare subsp. vulgare OX=112509 PE=3 SV=1	4.86867	4.02622	0.569254	0.826965	-0.468579
A0A8I6X164	>tr|A0A8I6X164|A0A8I6X164_HORVV Protein transport protein SEC23 OS=Hordeum vulgare subsp. vulgare OX=112509 PE=3 SV=1	0.964202	0.979473	0.93304	1.01584	0.0387535
A0A8I6X192	>tr|A0A8I6X192|A0A8I6X192_HORVV RNA helicase OS=Hordeum vulgare subsp. vulgare OX=112509 PE=4 SV=1	1.11178	1.20194	0.516724	1.08109	0.192308
A0A8I6X1C7	>tr|A0A8I6X1C7|A0A8I6X1C7_HORVV transketolase OS=Hordeum vulgare subsp. vulgare OX=112509 PE=3 SV=1	2.45644	3.02639	0.442291	1.23202	0.514607
A0A8I6X1G1	>tr|A0A8I6X1G1|A0A8I6X1G1_HORVV Glyoxylate/succinic semialdehyde reductase 2, chloroplastic OS=Hordeum vulgare subsp. vulgare OX=112509 PE=3 SV=1	0.621754	0.802024	0.416429	1.28994	0.627908
A0A8I6X1G6	>tr|A0A8I6X1G6|A0A8I6X1G6_HORVV (+)-neomenthol dehydrogenase OS=Hordeum vulgare subsp. vulgare OX=112509 PE=3 SV=1	0.629889	0.618333	0.869355	0.981654	-0.0456682
A0A8I6X1G8	>tr|A0A8I6X1G8|A0A8I6X1G8_HORVV Uncharacterized protein OS=Hordeum vulgare subsp. vulgare OX=112509 PE=4 SV=1	2.31239	1.60399	0.265529	0.69365	-0.902145
A0A8I6X1H4	>tr|A0A8I6X1H4|A0A8I6X1H4_HORVV Clu domain-containing protein OS=Hordeum vulgare subsp. vulgare OX=112509 PE=4 SV=1	0.830123	0.670617	0.202939	0.807853	-0.526249
A0A8I6X1I0	>tr|A0A8I6X1I0|A0A8I6X1I0_HORVV Uncharacterized protein OS=Hordeum vulgare subsp. vulgare OX=112509 PE=3 SV=1	6.69307	6.29903	0.631295	0.941127	-0.149647
A0A8I6X1I1	>tr|A0A8I6X1I1|A0A8I6X1I1_HORVV Protein decapping 5 OS=Hordeum vulgare subsp. vulgare OX=112509 PE=4 SV=1	2.06325	1.50387	0.247411	0.728881	-0.779955
A0A8I6X1I3	>tr|A0A8I6X1I3|A0A8I6X1I3_HORVV MPN domain-containing protein OS=Hordeum vulgare subsp. vulgare OX=112509 PE=3 SV=1	10.1068	10.0121	0.978704	0.990635	-0.0232059
A0A8I6X1J3	>tr|A0A8I6X1J3|A0A8I6X1J3_HORVV Uncharacterized protein OS=Hordeum vulgare subsp. vulgare OX=112509 PE=4 SV=1	0.682668	0.508588	0.173248	0.745001	-0.726006
A0A8I6X1P4	>tr|A0A8I6X1P4|A0A8I6X1P4_HORVV AMP deaminase OS=Hordeum vulgare subsp. vulgare OX=112509 PE=3 SV=1	0.8908	0.836761	0.782238	0.939336	-0.154345
A0A8I6X1S1	>tr|A0A8I6X1S1|A0A8I6X1S1_HORVV Nucleoporin Nup54 alpha-helical domain-containing protein OS=Hordeum vulgare subsp. vulgare OX=112509 PE=4 SV=1	1.06362	0.672101	0.307453	0.6319	-1.13209
A0A8I6X1V3	>tr|A0A8I6X1V3|A0A8I6X1V3_HORVV Translin OS=Hordeum vulgare subsp. vulgare OX=112509 PE=3 SV=1	1.66113	1.33788	0.544342	0.805398	-0.533753
A0A8I6X218	>tr|A0A8I6X218|A0A8I6X218_HORVV Mitochondrial import receptor subunit TOM40-1 OS=Hordeum vulgare subsp. vulgare OX=112509 PE=3 SV=1	1.05914	1.32198	0.576139	1.24817	0.546719
A0A8I6X232	>tr|A0A8I6X232|A0A8I6X232_HORVV UspA domain-containing protein OS=Hordeum vulgare subsp. vulgare OX=112509 PE=4 SV=1	0.454131	0.435938	0.915404	0.959938	-0.100838
A0A8I6X255	>tr|A0A8I6X255|A0A8I6X255_HORVV PH domain-containing protein OS=Hordeum vulgare subsp. vulgare OX=112509 PE=4 SV=1	0.659218	0.713808	0.882866	1.08281	0.196219
A0A8I6X264	>tr|A0A8I6X264|A0A8I6X264_HORVV Adenylosuccinate lyase OS=Hordeum vulgare subsp. vulgare OX=112509 PE=3 SV=1	0.63859	0.338595	0.139622	0.530223	-1.56477
A0A8I6X286	>tr|A0A8I6X286|A0A8I6X286_HORVV Metallo-beta-lactamase domain-containing protein OS=Hordeum vulgare subsp. vulgare OX=112509 PE=4 SV=1	0.540735	0.460354	0.359067	0.851347	-0.396914
A0A8I6X2A7	>tr|A0A8I6X2A7|A0A8I6X2A7_HORVV Peptidase S9 prolyl oligopeptidase catalytic domain-containing protein OS=Hordeum vulgare subsp. vulgare OX=112509 PE=4 SV=1	1.64812	2.07956	0.010189	1.26177	0.573462
A0A8I6X2E4	>tr|A0A8I6X2E4|A0A8I6X2E4_HORVV RING-type E3 ubiquitin transferase OS=Hordeum vulgare subsp. vulgare OX=112509 PE=4 SV=1	0.533098	0.298666	0.158378	0.560245	-1.42893
A0A8I6X2H2	>tr|A0A8I6X2H2|A0A8I6X2H2_HORVV THUMP domain-containing protein OS=Hordeum vulgare subsp. vulgare OX=112509 PE=4 SV=1	0.512861	0.383892	0.321493	0.748531	-0.714346
A0A8I6X2K4	>tr|A0A8I6X2K4|A0A8I6X2K4_HORVV Alpha-1,4 glucan phosphorylase OS=Hordeum vulgare subsp. vulgare OX=112509 PE=3 SV=1	1.56053	1.49811	0.916787	0.96	-0.10068
A0A8I6X2M0	>tr|A0A8I6X2M0|A0A8I6X2M0_HORVV threonine--tRNA ligase OS=Hordeum vulgare subsp. vulgare OX=112509 PE=3 SV=1	1.313	1.30578	0.984159	0.994507	-0.0135851
A0A8I6X2P8	>tr|A0A8I6X2P8|A0A8I6X2P8_HORVV Bifunctional inhibitor/plant lipid transfer protein/seed storage helical domain-containing protein OS=Hordeum vulgare subsp. vulgare OX=112509 PE=3 SV=1	0.513383	0.534203	0.85664	1.04056	0.0980483
A0A8I6X2Q8	>tr|A0A8I6X2Q8|A0A8I6X2Q8_HORVV Hydroxyisourate hydrolase OS=Hordeum vulgare subsp. vulgare OX=112509 PE=4 SV=1	1.7856	1.18625	0.0892626	0.664345	-1.0086
A0A8I6X2S1	>tr|A0A8I6X2S1|A0A8I6X2S1_HORVV Cation-transporting P-type ATPase N-terminal domain-containing protein OS=Hordeum vulgare subsp. vulgare OX=112509 PE=4 SV=1	0.508763	0.386882	0.503828	0.760436	-0.675429
A0A8I6X2U4	>tr|A0A8I6X2U4|A0A8I6X2U4_HORVV Ubiquitin-like domain-containing protein OS=Hordeum vulgare subsp. vulgare OX=112509 PE=4 SV=1	0.662347	0.4581	0.299088	0.691632	-0.909328
A0A8I6X2Y8	>tr|A0A8I6X2Y8|A0A8I6X2Y8_HORVV GOLD domain-containing protein OS=Hordeum vulgare subsp. vulgare OX=112509 PE=3 SV=1	0.427357	0.519653	0.705237	1.21597	0.482267
A0A8I6X313	>tr|A0A8I6X313|A0A8I6X313_HORVV Histone H2B OS=Hordeum vulgare subsp. vulgare OX=112509 PE=3 SV=1	1.03647	0.520244	0.059128	0.50194	-1.69996
A0A8I6X374	>tr|A0A8I6X374|A0A8I6X374_HORVV Imidazole glycerol phosphate synthase hisHF OS=Hordeum vulgare subsp. vulgare OX=112509 PE=3 SV=1	0.730354	0.756661	0.945698	1.03602	0.0872694
A0A8I6X3A9	>tr|A0A8I6X3A9|A0A8I6X3A9_HORVV Chloride conductance regulatory protein ICln OS=Hordeum vulgare subsp. vulgare OX=112509 PE=4 SV=1	0.560067	0.588872	0.812691	1.05143	0.123689
A0A8I6X3C2	>tr|A0A8I6X3C2|A0A8I6X3C2_HORVV Histone H2A/H2B/H3 domain-containing protein OS=Hordeum vulgare subsp. vulgare OX=112509 PE=3 SV=1	0.757639	0.633472	0.650103	0.836113	-0.441447
A0A8I6X3D1	>tr|A0A8I6X3D1|A0A8I6X3D1_HORVV Clp R domain-containing protein OS=Hordeum vulgare subsp. vulgare OX=112509 PE=3 SV=1	0.450129	0.632709	0.375569	1.40562	0.839717
A0A8I6X3E1	>tr|A0A8I6X3E1|A0A8I6X3E1_HORVV Uncharacterized protein OS=Hordeum vulgare subsp. vulgare OX=112509 PE=4 SV=1	0.707383	0.560259	0.697193	0.792017	-0.575075
A0A8I6X3E8	>tr|A0A8I6X3E8|A0A8I6X3E8_HORVV Phytocyanin domain-containing protein OS=Hordeum vulgare subsp. vulgare OX=112509 PE=3 SV=1	0.825339	0.578249	0.0857087	0.70062	-0.877485
A0A8I6X3G0	>tr|A0A8I6X3G0|A0A8I6X3G0_HORVV Altered inheritance of mitochondria protein 32 OS=Hordeum vulgare subsp. vulgare OX=112509 PE=4 SV=1	0.655098	0.832152	0.169171	1.27027	0.590011
A0A8I6X3H5	>tr|A0A8I6X3H5|A0A8I6X3H5_HORVV CSD domain-containing protein OS=Hordeum vulgare subsp. vulgare OX=112509 PE=4 SV=1	0.381763	0.504252	0.210154	1.32085	0.68631
A0A8I6X3H7	>tr|A0A8I6X3H7|A0A8I6X3H7_HORVV Casein kinase substrate phosphoprotein PP28 domain-containing protein OS=Hordeum vulgare subsp. vulgare OX=112509 PE=4 SV=1	1.38597	1.34907	0.954787	0.973378	-0.066547
A0A8I6X3I2	>tr|A0A8I6X3I2|A0A8I6X3I2_HORVV Uncharacterized protein OS=Hordeum vulgare subsp. vulgare OX=112509 PE=4 SV=1	0.326767	0.285379	0.732401	0.873341	-0.334009
A0A8I6X3I3	>tr|A0A8I6X3I3|A0A8I6X3I3_HORVV NADH dehydrogenase [ubiquinone] 1 alpha subcomplex assembly factor 3 OS=Hordeum vulgare subsp. vulgare OX=112509 PE=4 SV=1	0.569467	0.444006	0.415006	0.779688	-0.613767
A0A8I6X3I7	>tr|A0A8I6X3I7|A0A8I6X3I7_HORVV Peptidase A1 domain-containing protein OS=Hordeum vulgare subsp. vulgare OX=112509 PE=3 SV=1	5.80474	6.51702	0.195797	1.12271	0.285456
A0A8I6X3K6	>tr|A0A8I6X3K6|A0A8I6X3K6_HORVV Aldose 1-epimerase OS=Hordeum vulgare subsp. vulgare OX=112509 PE=3 SV=1	3.46173	3.16852	0.443979	0.915298	-0.218282
A0A8I6X3P4	>tr|A0A8I6X3P4|A0A8I6X3P4_HORVV Proteasome subunit beta OS=Hordeum vulgare subsp. vulgare OX=112509 PE=3 SV=1	3.31349	3.42519	0.963096	1.03371	0.0817712
A0A8I6X3U6	>tr|A0A8I6X3U6|A0A8I6X3U6_HORVV Uncharacterized protein OS=Hordeum vulgare subsp. vulgare OX=112509 PE=4 SV=1	0.856895	0.747762	0.55122	0.872641	-0.335987
A0A8I6X402	>tr|A0A8I6X402|A0A8I6X402_HORVV FYVE-type domain-containing protein OS=Hordeum vulgare subsp. vulgare OX=112509 PE=4 SV=1	0.587219	0.456659	0.385509	0.777665	-0.620175
A0A8I6X416	>tr|A0A8I6X416|A0A8I6X416_HORVV Carboxypeptidase OS=Hordeum vulgare subsp. vulgare OX=112509 PE=3 SV=1	0.495765	0.65038	0.23785	1.31187	0.669488
A0A8I6X472	>tr|A0A8I6X472|A0A8I6X472_HORVV RNA cytidine acetyltransferase OS=Hordeum vulgare subsp. vulgare OX=112509 PE=3 SV=1	0.635398	0.567674	0.209746	0.893415	-0.277961
A0A8I6X488	>tr|A0A8I6X488|A0A8I6X488_HORVV Cysteine proteinase inhibitor OS=Hordeum vulgare subsp. vulgare OX=112509 PE=3 SV=1	4.56671	4.04198	0.528068	0.885097	-0.301033
A0A8I6X490	>tr|A0A8I6X490|A0A8I6X490_HORVV Mitochondrial proton/calcium exchanger protein OS=Hordeum vulgare subsp. vulgare OX=112509 PE=3 SV=1	2.02107	1.58828	0.0382099	0.78586	-0.594322
A0A8I6X4E1	>tr|A0A8I6X4E1|A0A8I6X4E1_HORVV Phospho-2-dehydro-3-deoxyheptonate aldolase OS=Hordeum vulgare subsp. vulgare OX=112509 PE=3 SV=1	2.74555	2.61229	0.755174	0.951462	-0.122712
A0A8I6X4F7	>tr|A0A8I6X4F7|A0A8I6X4F7_HORVV UspA domain-containing protein OS=Hordeum vulgare subsp. vulgare OX=112509 PE=4 SV=1	1.48297	1.32421	0.787766	0.892948	-0.279251
A0A8I6X4I2	>tr|A0A8I6X4I2|A0A8I6X4I2_HORVV 3-methyl-2-oxobutanoate hydroxymethyltransferase OS=Hordeum vulgare subsp. vulgare OX=112509 PE=3 SV=1	1.79857	0.882213	0.252161	0.490509	-1.75678
A0A8I6X4L0	>tr|A0A8I6X4L0|A0A8I6X4L0_HORVV Beta-amylase OS=Hordeum vulgare subsp. vulgare OX=112509 PE=3 SV=1	0.719391	0.926545	0.405973	1.28796	0.624116
A0A8I6X4L1	>tr|A0A8I6X4L1|A0A8I6X4L1_HORVV DUF1421 domain-containing protein OS=Hordeum vulgare subsp. vulgare OX=112509 PE=4 SV=1	2.66464	2.22471	0.209573	0.834903	-0.44502
A0A8I6X4N5	>tr|A0A8I6X4N5|A0A8I6X4N5_HORVV Heme-binding protein OS=Hordeum vulgare subsp. vulgare OX=112509 PE=3 SV=1	0.458123	0.319814	0.381224	0.698098	-0.886379
A0A8I6X4R7	>tr|A0A8I6X4R7|A0A8I6X4R7_HORVV Pyruvate, phosphate dikinase regulatory protein, chloroplastic OS=Hordeum vulgare subsp. vulgare OX=112509 PE=3 SV=1	0.619872	0.588443	0.848856	0.949297	-0.128329
A0A8I6X4X8	>tr|A0A8I6X4X8|A0A8I6X4X8_HORVV Leucine-rich repeat-containing N-terminal plant-type domain-containing protein OS=Hordeum vulgare subsp. vulgare OX=112509 PE=4 SV=1	1.01842	0.75042	0.126481	0.736848	-0.753144
A0A8I6X4Y8	>tr|A0A8I6X4Y8|A0A8I6X4Y8_HORVV Purple acid phosphatase OS=Hordeum vulgare subsp. vulgare OX=112509 PE=3 SV=1	0.625504	0.444927	0.153928	0.71131	-0.840139
A0A8I6X504	>tr|A0A8I6X504|A0A8I6X504_HORVV Uncharacterized protein OS=Hordeum vulgare subsp. vulgare OX=112509 PE=4 SV=1	0.836717	0.912145	0.456773	1.09015	0.212874
A0A8I6X522	>tr|A0A8I6X522|A0A8I6X522_HORVV glutamine--tRNA ligase OS=Hordeum vulgare subsp. vulgare OX=112509 PE=3 SV=1	6.77851	7.3528	0.786385	1.08472	0.200569
A0A8I6X546	>tr|A0A8I6X546|A0A8I6X546_HORVV Chaperonin CPN60-2, mitochondrial OS=Hordeum vulgare subsp. vulgare OX=112509 PE=3 SV=1	5.56925	4.93057	0.431464	0.885321	-0.300409
A0A8I6X558	>tr|A0A8I6X558|A0A8I6X558_HORVV Malate synthase OS=Hordeum vulgare subsp. vulgare OX=112509 PE=3 SV=1	5.88571	4.45291	0.0129515	0.756563	-0.688024
A0A8I6X559	>tr|A0A8I6X559|A0A8I6X559_HORVV PRA1 family protein OS=Hordeum vulgare subsp. vulgare OX=112509 PE=3 SV=1	1.51253	0.996399	0.10469	0.658764	-1.02941
A0A8I6X589	>tr|A0A8I6X589|A0A8I6X589_HORVV C3H1-type domain-containing protein OS=Hordeum vulgare subsp. vulgare OX=112509 PE=4 SV=1	3.93424	4.6148	0.695789	1.17298	0.3935
A0A8I6X5B7	>tr|A0A8I6X5B7|A0A8I6X5B7_HORVV J domain-containing protein OS=Hordeum vulgare subsp. vulgare OX=112509 PE=4 SV=1	1.22045	1.02281	0.250086	0.83806	-0.435712
A0A8I6X5G8	>tr|A0A8I6X5G8|A0A8I6X5G8_HORVV NADP-dependent oxidoreductase domain-containing protein OS=Hordeum vulgare subsp. vulgare OX=112509 PE=4 SV=1	0.633407	0.649124	0.790555	1.02481	0.0604521
A0A8I6X5V1	>tr|A0A8I6X5V1|A0A8I6X5V1_HORVV NADH dehydrogenase [ubiquinone] 1 alpha subcomplex subunit 12 OS=Hordeum vulgare subsp. vulgare OX=112509 PE=3 SV=1	3.19798	3.23594	0.936624	1.01187	0.0291087
A0A8I6X5V6	>tr|A0A8I6X5V6|A0A8I6X5V6_HORVV AP-4 complex subunit epsilon OS=Hordeum vulgare subsp. vulgare OX=112509 PE=3 SV=1	1.15639	1.0484	0.856551	0.906613	-0.241795
A0A8I6X5W1	>tr|A0A8I6X5W1|A0A8I6X5W1_HORVV Uncharacterized protein OS=Hordeum vulgare subsp. vulgare OX=112509 PE=4 SV=1	1.42813	1.05383	0.164583	0.737909	-0.749596
A0A8I6X660	>tr|A0A8I6X660|A0A8I6X660_HORVV C3H1-type domain-containing protein OS=Hordeum vulgare subsp. vulgare OX=112509 PE=4 SV=1	1.07016	1.18562	0.729427	1.10789	0.252692
A0A8I6X666	>tr|A0A8I6X666|A0A8I6X666_HORVV F-box domain-containing protein OS=Hordeum vulgare subsp. vulgare OX=112509 PE=4 SV=1	0.611296	0.573521	0.541296	0.938206	-0.157314
A0A8I6X6A3	>tr|A0A8I6X6A3|A0A8I6X6A3_HORVV J domain-containing protein OS=Hordeum vulgare subsp. vulgare OX=112509 PE=4 SV=1	0.480415	0.86404	0.0798971	1.79853	1.44764
A0A8I6X6B1	>tr|A0A8I6X6B1|A0A8I6X6B1_HORVV phosphoribosylformylglycinamidine synthase OS=Hordeum vulgare subsp. vulgare OX=112509 PE=3 SV=1	0.742882	0.61724	0.154966	0.830872	-0.456956
A0A8I6X6C0	>tr|A0A8I6X6C0|A0A8I6X6C0_HORVV GYF domain-containing protein OS=Hordeum vulgare subsp. vulgare OX=112509 PE=4 SV=1	2.45711	2.2056	0.658354	0.897641	-0.266323
A0A8I6X6D4	>tr|A0A8I6X6D4|A0A8I6X6D4_HORVV Cupin type-2 domain-containing protein OS=Hordeum vulgare subsp. vulgare OX=112509 PE=4 SV=1	1.06084	1.69269	0.26763	1.59561	1.15239
A0A8I6X6D5	>tr|A0A8I6X6D5|A0A8I6X6D5_HORVV NADP-dependent oxidoreductase domain-containing protein OS=Hordeum vulgare subsp. vulgare OX=112509 PE=3 SV=1	1.43545	3.01789	0.0635509	2.10239	1.83265
A0A8I6X6F8	>tr|A0A8I6X6F8|A0A8I6X6F8_HORVV Calcium-dependent protein kinase OS=Hordeum vulgare subsp. vulgare OX=112509 PE=4 SV=1	2.42525	2.29799	0.675025	0.947526	-0.132936
A0A8I6X6I4	>tr|A0A8I6X6I4|A0A8I6X6I4_HORVV Signal peptidase complex catalytic subunit SEC11 OS=Hordeum vulgare subsp. vulgare OX=112509 PE=3 SV=1	2.65768	2.05359	0.254743	0.772703	-0.635964
A0A8I6X6J9	>tr|A0A8I6X6J9|A0A8I6X6J9_HORVV Alcohol dehydrogenase OS=Hordeum vulgare subsp. vulgare OX=112509 PE=3 SV=1	1.15816	1.64264	0.148611	1.41832	0.861902
A0A8I6X6K9	>tr|A0A8I6X6K9|A0A8I6X6K9_HORVV glutathione transferase OS=Hordeum vulgare subsp. vulgare OX=112509 PE=3 SV=1	0.863842	0.461123	0.221826	0.533804	-1.54816
A0A8I6X6L8	>tr|A0A8I6X6L8|A0A8I6X6L8_HORVV C2 domain-containing protein OS=Hordeum vulgare subsp. vulgare OX=112509 PE=4 SV=1	0.766465	0.627649	0.54348	0.818887	-0.49279
A0A8I6X6P0	>tr|A0A8I6X6P0|A0A8I6X6P0_HORVV DUF255 domain-containing protein OS=Hordeum vulgare subsp. vulgare OX=112509 PE=4 SV=1	0.527107	0.797229	0.521621	1.51246	1.0204
A0A8I6X6Q2	>tr|A0A8I6X6Q2|A0A8I6X6Q2_HORVV Uncharacterized protein OS=Hordeum vulgare subsp. vulgare OX=112509 PE=4 SV=1	0.517382	0.708392	0.536424	1.36919	0.774951
A0A8I6X6S0	>tr|A0A8I6X6S0|A0A8I6X6S0_HORVV mannan endo-1,4-beta-mannosidase OS=Hordeum vulgare subsp. vulgare OX=112509 PE=3 SV=1	0.562135	0.486337	0.574532	0.865161	-0.357219
A0A8I6X6U3	>tr|A0A8I6X6U3|A0A8I6X6U3_HORVV SUN domain-containing protein OS=Hordeum vulgare subsp. vulgare OX=112509 PE=4 SV=1	0.314613	0.500473	0.387343	1.59076	1.14489
A0A8I6X6U8	>tr|A0A8I6X6U8|A0A8I6X6U8_HORVV Dynamin-related protein 5A OS=Hordeum vulgare subsp. vulgare OX=112509 PE=3 SV=1	0.579129	0.842169	0.287014	1.4542	0.923524
A0A8I6X6X4	>tr|A0A8I6X6X4|A0A8I6X6X4_HORVV 2-oxoglutarate dehydrogenase, mitochondrial OS=Hordeum vulgare subsp. vulgare OX=112509 PE=3 SV=1	2.82804	1.89778	0.287738	0.671057	-0.983812
A0A8I6X6Y8	>tr|A0A8I6X6Y8|A0A8I6X6Y8_HORVV V-type proton ATPase subunit G OS=Hordeum vulgare subsp. vulgare OX=112509 PE=3 SV=1	8.48821	6.93466	0.49662	0.816976	-0.498553
A0A8I6X746	>tr|A0A8I6X746|A0A8I6X746_HORVV Serine/threonine-protein phosphatase 6 regulatory subunit OS=Hordeum vulgare subsp. vulgare OX=112509 PE=3 SV=1	1.03849	0.776285	0.584279	0.747516	-0.717695
A0A8I6X762	>tr|A0A8I6X762|A0A8I6X762_HORVV Carbohydrate-binding-like fold protein OS=Hordeum vulgare subsp. vulgare OX=112509 PE=4 SV=1	1.33581	1.7841	0.143889	1.33559	0.713685
A0A8I6X7D5	>tr|A0A8I6X7D5|A0A8I6X7D5_HORVV Thaumatin-like protein OS=Hordeum vulgare subsp. vulgare OX=112509 PE=4 SV=1	0.398912	0.916741	0.053511	2.29811	2.05217
A0A8I6X7E0	>tr|A0A8I6X7E0|A0A8I6X7E0_HORVV non-specific serine/threonine protein kinase OS=Hordeum vulgare subsp. vulgare OX=112509 PE=3 SV=1	0.532158	0.395025	0.273176	0.742307	-0.734941
A0A8I6X7G0	>tr|A0A8I6X7G0|A0A8I6X7G0_HORVV Histone H2B OS=Hordeum vulgare subsp. vulgare OX=112509 PE=3 SV=1	0.656484	0.606183	0.464187	0.923379	-0.196603
A0A8I6X7G6	>tr|A0A8I6X7G6|A0A8I6X7G6_HORVV AAA+ ATPase domain-containing protein OS=Hordeum vulgare subsp. vulgare OX=112509 PE=3 SV=1	0.413927	0.417727	0.973561	1.00918	0.0225344
A0A8I6X7G9	>tr|A0A8I6X7G9|A0A8I6X7G9_HORVV Cysteine synthase OS=Hordeum vulgare subsp. vulgare OX=112509 PE=3 SV=1	3.56517	2.77659	0.26852	0.778808	-0.616552
A0A8I6X7K0	>tr|A0A8I6X7K0|A0A8I6X7K0_HORVV Carboxypeptidase OS=Hordeum vulgare subsp. vulgare OX=112509 PE=3 SV=1	2.52991	2.82629	0.683033	1.11715	0.273225
A0A8I6X7L9	>tr|A0A8I6X7L9|A0A8I6X7L9_HORVV protein-serine/threonine phosphatase OS=Hordeum vulgare subsp. vulgare OX=112509 PE=4 SV=1	1.45845	1.29792	0.643515	0.889929	-0.287603
A0A8I6X7M2	>tr|A0A8I6X7M2|A0A8I6X7M2_HORVV RING-type domain-containing protein OS=Hordeum vulgare subsp. vulgare OX=112509 PE=4 SV=1	1.2303	1.07328	0.0849676	0.872371	-0.336751
A0A8I6X7M7	>tr|A0A8I6X7M7|A0A8I6X7M7_HORVV Carboxypeptidase OS=Hordeum vulgare subsp. vulgare OX=112509 PE=3 SV=1	3.23068	1.71826	0.187011	0.531858	-1.55717
A0A8I6X7M9	>tr|A0A8I6X7M9|A0A8I6X7M9_HORVV Uncharacterized protein OS=Hordeum vulgare subsp. vulgare OX=112509 PE=4 SV=1	1.18123	1.25564	0.821199	1.06299	0.150657
A0A8I6X7P5	>tr|A0A8I6X7P5|A0A8I6X7P5_HORVV NAD-dependent epimerase/dehydratase domain-containing protein OS=Hordeum vulgare subsp. vulgare OX=112509 PE=4 SV=1	0.708323	1.14295	0.2061	1.6136	1.18005
A0A8I6X7P9	>tr|A0A8I6X7P9|A0A8I6X7P9_HORVV Adenosylhomocysteinase OS=Hordeum vulgare subsp. vulgare OX=112509 PE=3 SV=1	2.43367	1.70757	0.302316	0.701643	-0.873886
A0A8I6X7Q6	>tr|A0A8I6X7Q6|A0A8I6X7Q6_HORVV COP9 signalosome complex subunit 8 OS=Hordeum vulgare subsp. vulgare OX=112509 PE=3 SV=1	0.627104	0.545093	0.312934	0.869223	-0.345666
A0A8I6X7V4	>tr|A0A8I6X7V4|A0A8I6X7V4_HORVV DNA damage-binding protein 1 OS=Hordeum vulgare subsp. vulgare OX=112509 PE=3 SV=1	1.43568	1.36157	0.739152	0.948385	-0.130702
A0A8I6X7Z6	>tr|A0A8I6X7Z6|A0A8I6X7Z6_HORVV Germin-like protein OS=Hordeum vulgare subsp. vulgare OX=112509 PE=3 SV=1	3.18643	2.52024	0.318151	0.790929	-0.578463
A0A8I6X827	>tr|A0A8I6X827|A0A8I6X827_HORVV glycerol kinase OS=Hordeum vulgare subsp. vulgare OX=112509 PE=3 SV=1	1.09733	1.03905	0.657266	0.946886	-0.134602
A0A8I6X839	>tr|A0A8I6X839|A0A8I6X839_HORVV Growth-regulating factor OS=Hordeum vulgare subsp. vulgare OX=112509 PE=3 SV=1	0.456903	0.226447	0.0550097	0.495613	-1.73125
A0A8I6X850	>tr|A0A8I6X850|A0A8I6X850_HORVV AAA+ ATPase domain-containing protein OS=Hordeum vulgare subsp. vulgare OX=112509 PE=3 SV=1	0.544321	0.40148	0.657905	0.737579	-0.750699
A0A8I6X899	>tr|A0A8I6X899|A0A8I6X899_HORVV Histone deacetylase domain-containing protein OS=Hordeum vulgare subsp. vulgare OX=112509 PE=4 SV=1	0.736816	0.620963	0.0459777	0.842766	-0.421902
A0A8I6X8A4	>tr|A0A8I6X8A4|A0A8I6X8A4_HORVV pyridoxal kinase OS=Hordeum vulgare subsp. vulgare OX=112509 PE=3 SV=1	0.447644	0.457757	0.955078	1.02259	0.0550958
A0A8I6X8A8	>tr|A0A8I6X8A8|A0A8I6X8A8_HORVV Mitochondrial import receptor subunit TOM7-1 OS=Hordeum vulgare subsp. vulgare OX=112509 PE=3 SV=1	0.690297	0.806317	0.242168	1.16807	0.383153
A0A8I6X8C4	>tr|A0A8I6X8C4|A0A8I6X8C4_HORVV proline--tRNA ligase OS=Hordeum vulgare subsp. vulgare OX=112509 PE=3 SV=1	0.918259	0.86166	0.576976	0.938363	-0.156903
A0A8I6X8E7	>tr|A0A8I6X8E7|A0A8I6X8E7_HORVV ubiquitinyl hydrolase 1 OS=Hordeum vulgare subsp. vulgare OX=112509 PE=3 SV=1	1.13999	1.24982	0.504844	1.09634	0.226844
A0A8I6X8F0	>tr|A0A8I6X8F0|A0A8I6X8F0_HORVV Bifunctional inhibitor/plant lipid transfer protein/seed storage helical domain-containing protein OS=Hordeum vulgare subsp. vulgare OX=112509 PE=4 SV=1	0.564643	0.528856	0.513917	0.936619	-0.161491
A0A8I6X8H0	>tr|A0A8I6X8H0|A0A8I6X8H0_HORVV CTLH domain-containing protein OS=Hordeum vulgare subsp. vulgare OX=112509 PE=4 SV=1	1.77618	0.57014	0.395558	0.320992	-2.80256
A0A8I6X8H8	>tr|A0A8I6X8H8|A0A8I6X8H8_HORVV Conserved oligomeric Golgi complex subunit 1 OS=Hordeum vulgare subsp. vulgare OX=112509 PE=3 SV=1	0.920045	0.805188	0.177876	0.875161	-0.328874
A0A8I6X8L4	>tr|A0A8I6X8L4|A0A8I6X8L4_HORVV Pyruvate kinase OS=Hordeum vulgare subsp. vulgare OX=112509 PE=3 SV=1	0.686564	0.670577	0.823436	0.976714	-0.0581084
A0A8I6X8L6	>tr|A0A8I6X8L6|A0A8I6X8L6_HORVV Uncharacterized protein OS=Hordeum vulgare subsp. vulgare OX=112509 PE=4 SV=1	0.962606	0.881299	0.718918	0.915535	-0.217644
A0A8I6X8R3	>tr|A0A8I6X8R3|A0A8I6X8R3_HORVV RanBD1 domain-containing protein OS=Hordeum vulgare subsp. vulgare OX=112509 PE=4 SV=1	0.733085	0.982058	0.517497	1.33962	0.721119
A0A8I6X8S0	>tr|A0A8I6X8S0|A0A8I6X8S0_HORVV Cupin type-1 domain-containing protein OS=Hordeum vulgare subsp. vulgare OX=112509 PE=4 SV=1	136.432	118.599	0.128625	0.869288	-0.345481
A0A8I6X8T5	>tr|A0A8I6X8T5|A0A8I6X8T5_HORVV Histone H2B OS=Hordeum vulgare subsp. vulgare OX=112509 PE=3 SV=1	12.8447	16.89	0.153376	1.31493	0.675239
A0A8I6X8T8	>tr|A0A8I6X8T8|A0A8I6X8T8_HORVV Anamorsin homolog OS=Hordeum vulgare subsp. vulgare OX=112509 PE=3 SV=1	1.04872	0.953336	0.761221	0.909052	-0.235171
A0A8I6X8W1	>tr|A0A8I6X8W1|A0A8I6X8W1_HORVV MPN domain-containing protein OS=Hordeum vulgare subsp. vulgare OX=112509 PE=4 SV=1	0.341713	0.491924	0.42781	1.43958	0.898606
A0A8I6X8X0	>tr|A0A8I6X8X0|A0A8I6X8X0_HORVV Vesicle transport v-SNARE N-terminal domain-containing protein OS=Hordeum vulgare subsp. vulgare OX=112509 PE=3 SV=1	0.725551	0.769918	0.889459	1.06115	0.14638
A0A8I6X8X2	>tr|A0A8I6X8X2|A0A8I6X8X2_HORVV Uncharacterized protein OS=Hordeum vulgare subsp. vulgare OX=112509 PE=4 SV=1	2.44199	2.24026	0.566646	0.917391	-0.21265
A0A8I6X8X3	>tr|A0A8I6X8X3|A0A8I6X8X3_HORVV Uncharacterized protein OS=Hordeum vulgare subsp. vulgare OX=112509 PE=4 SV=1	2.33084	2.00377	0.487331	0.859677	-0.372902
A0A8I6X906	>tr|A0A8I6X906|A0A8I6X906_HORVV BAT2 N-terminal domain-containing protein OS=Hordeum vulgare subsp. vulgare OX=112509 PE=4 SV=1	0.859516	0.769422	0.710095	0.89518	-0.273096
A0A8I6X926	>tr|A0A8I6X926|A0A8I6X926_HORVV Amidohydrolase-related domain-containing protein OS=Hordeum vulgare subsp. vulgare OX=112509 PE=4 SV=1	1.49532	1.28268	0.33661	0.857798	-0.378297
A0A8I6X928	>tr|A0A8I6X928|A0A8I6X928_HORVV Proteasome subunit beta OS=Hordeum vulgare subsp. vulgare OX=112509 PE=3 SV=1	3.78444	3.55491	0.331957	0.939349	-0.154313
A0A8I6X959	>tr|A0A8I6X959|A0A8I6X959_HORVV 68 kDa protein HP68 OS=Hordeum vulgare subsp. vulgare OX=112509 PE=4 SV=1	1.01766	1.9661	0.552297	1.93198	1.62417
A0A8I6X969	>tr|A0A8I6X969|A0A8I6X969_HORVV Amidase domain-containing protein OS=Hordeum vulgare subsp. vulgare OX=112509 PE=4 SV=1	0.599271	0.720073	0.545851	1.20158	0.452908
A0A8I6X988	>tr|A0A8I6X988|A0A8I6X988_HORVV Peroxin-7 OS=Hordeum vulgare subsp. vulgare OX=112509 PE=3 SV=1	0.86862	0.609722	0.494868	0.701944	-0.87283
A0A8I6X9B9	>tr|A0A8I6X9B9|A0A8I6X9B9_HORVV Peroxidase OS=Hordeum vulgare subsp. vulgare OX=112509 PE=3 SV=1	2.82381	2.72413	0.754241	0.964698	-0.0886382
A0A8I6X9C3	>tr|A0A8I6X9C3|A0A8I6X9C3_HORVV 3-oxoacyl-[acyl-carrier-protein] reductase OS=Hordeum vulgare subsp. vulgare OX=112509 PE=3 SV=1	2.11171	2.36579	0.161769	1.12032	0.280202
A0A8I6X9H0	>tr|A0A8I6X9H0|A0A8I6X9H0_HORVV t-SNARE coiled-coil homology domain-containing protein OS=Hordeum vulgare subsp. vulgare OX=112509 PE=3 SV=1	3.15477	3.3646	0.814148	1.06651	0.158813
A0A8I6X9J9	>tr|A0A8I6X9J9|A0A8I6X9J9_HORVV BED-type domain-containing protein OS=Hordeum vulgare subsp. vulgare OX=112509 PE=4 SV=1	1.03276	1.00969	0.878975	0.977665	-0.0557093
A0A8I6X9N2	>tr|A0A8I6X9N2|A0A8I6X9N2_HORVV Delta-1-pyrroline-5-carboxylate synthase OS=Hordeum vulgare subsp. vulgare OX=112509 PE=3 SV=1	3.04308	2.81644	0.663877	0.925524	-0.190881
A0A8I6X9P2	>tr|A0A8I6X9P2|A0A8I6X9P2_HORVV Pectinesterase inhibitor domain-containing protein OS=Hordeum vulgare subsp. vulgare OX=112509 PE=3 SV=1	0.446199	0.36953	0.291369	0.828172	-0.464982
A0A8I6X9V4	>tr|A0A8I6X9V4|A0A8I6X9V4_HORVV Apyrase OS=Hordeum vulgare subsp. vulgare OX=112509 PE=3 SV=1	0.682368	0.536004	0.202606	0.785506	-0.595434
A0A8I6X9X3	>tr|A0A8I6X9X3|A0A8I6X9X3_HORVV PA domain-containing protein OS=Hordeum vulgare subsp. vulgare OX=112509 PE=4 SV=1	2.773	2.53658	0.345122	0.914745	-0.219772
A0A8I6X9X5	>tr|A0A8I6X9X5|A0A8I6X9X5_HORVV Polyadenylate-binding protein OS=Hordeum vulgare subsp. vulgare OX=112509 PE=3 SV=1	4.94816	4.48463	0.469781	0.906323	-0.242584
A0A8I6X9Y0	>tr|A0A8I6X9Y0|A0A8I6X9Y0_HORVV CTLH domain-containing protein OS=Hordeum vulgare subsp. vulgare OX=112509 PE=4 SV=1	0.435329	0.423882	0.932147	0.973704	-0.0657206
A0A8I6XA15	>tr|A0A8I6XA15|A0A8I6XA15_HORVV Exocyst complex component SEC5 OS=Hordeum vulgare subsp. vulgare OX=112509 PE=3 SV=1	0.586863	0.609496	0.842072	1.03857	0.0933252
A0A8I6XA18	>tr|A0A8I6XA18|A0A8I6XA18_HORVV DNA-directed RNA polymerases I, II, and III subunit RPABC3 OS=Hordeum vulgare subsp. vulgare OX=112509 PE=3 SV=1	0.854162	0.92744	0.828663	1.08579	0.202995
A0A8I6XA25	>tr|A0A8I6XA25|A0A8I6XA25_HORVV Uncharacterized protein OS=Hordeum vulgare subsp. vulgare OX=112509 PE=3 SV=1	1.32091	1.81907	0.0310988	1.37713	0.789217
A0A8I6XA39	>tr|A0A8I6XA39|A0A8I6XA39_HORVV phosphoenolpyruvate carboxylase OS=Hordeum vulgare subsp. vulgare OX=112509 PE=3 SV=1	0.803121	0.813156	0.94903	1.01249	0.0306249
A0A8I6XA41	>tr|A0A8I6XA41|A0A8I6XA41_HORVV Uncharacterized protein OS=Hordeum vulgare subsp. vulgare OX=112509 PE=4 SV=1	0.542528	0.526886	0.94839	0.971168	-0.0721544
A0A8I6XA58	>tr|A0A8I6XA58|A0A8I6XA58_HORVV Beta-glucosidase OS=Hordeum vulgare subsp. vulgare OX=112509 PE=3 SV=1	0.377628	0.261588	0.320819	0.692714	-0.905473
A0A8I6XA72	>tr|A0A8I6XA72|A0A8I6XA72_HORVV Uncharacterized protein OS=Hordeum vulgare subsp. vulgare OX=112509 PE=4 SV=1	2.15198	1.95685	0.714953	0.909324	-0.234432
A0A8I6XA74	>tr|A0A8I6XA74|A0A8I6XA74_HORVV SLL1 protein OS=Hordeum vulgare subsp. vulgare OX=112509 PE=4 SV=1	0.694447	0.580598	0.185342	0.836058	-0.44161
A0A8I6XA88	>tr|A0A8I6XA88|A0A8I6XA88_HORVV Formamidase OS=Hordeum vulgare subsp. vulgare OX=112509 PE=4 SV=1	0.64932	0.598505	0.447118	0.921742	-0.20098
A0A8I6XA89	>tr|A0A8I6XA89|A0A8I6XA89_HORVV Eukaryotic translation initiation factor 3 subunit A OS=Hordeum vulgare subsp. vulgare OX=112509 PE=3 SV=1	6.65684	7.25917	0.82145	1.09048	0.213633
A0A8I6XAC6	>tr|A0A8I6XAC6|A0A8I6XAC6_HORVV Protein kinase domain-containing protein OS=Hordeum vulgare subsp. vulgare OX=112509 PE=4 SV=1	0.613383	0.551565	0.524984	0.899218	-0.261994
A0A8I6XAD9	>tr|A0A8I6XAD9|A0A8I6XAD9_HORVV Single-stranded DNA-binding protein, mitochondrial OS=Hordeum vulgare subsp. vulgare OX=112509 PE=4 SV=1	0.578583	0.522042	0.270425	0.902276	-0.253622
A0A8I6XAF4	>tr|A0A8I6XAF4|A0A8I6XAF4_HORVV Protein EARLY RESPONSIVE TO DEHYDRATION 15 OS=Hordeum vulgare subsp. vulgare OX=112509 PE=4 SV=1	1.75819	1.18943	0.433777	0.676509	-0.963856
A0A8I6XAG3	>tr|A0A8I6XAG3|A0A8I6XAG3_HORVV 1,4-alpha-glucan branching enzyme OS=Hordeum vulgare subsp. vulgare OX=112509 PE=3 SV=1	1.95124	1.92063	0.959271	0.984314	-0.0389928
A0A8I6XAH7	>tr|A0A8I6XAH7|A0A8I6XAH7_HORVV Uncharacterized protein OS=Hordeum vulgare subsp. vulgare OX=112509 PE=3 SV=1	1.90775	3.2254	0.31903	1.69068	1.29513
A0A8I6XAI2	>tr|A0A8I6XAI2|A0A8I6XAI2_HORVV Vacuolar protein sorting-associated protein 28 homolog OS=Hordeum vulgare subsp. vulgare OX=112509 PE=3 SV=1	0.60742	0.492318	0.381281	0.810506	-0.518162
A0A8I6XAI5	>tr|A0A8I6XAI5|A0A8I6XAI5_HORVV Magnesium transporter OS=Hordeum vulgare subsp. vulgare OX=112509 PE=4 SV=1	1.59692	3.3485	0.508064	2.09685	1.82614
A0A8I6XAM1	>tr|A0A8I6XAM1|A0A8I6XAM1_HORVV Uncharacterized protein OS=Hordeum vulgare subsp. vulgare OX=112509 PE=4 SV=1	1.79829	0.963911	0.142823	0.536016	-1.53797
A0A8I6XAN4	>tr|A0A8I6XAN4|A0A8I6XAN4_HORVV Obg-like ATPase 1 OS=Hordeum vulgare subsp. vulgare OX=112509 PE=3 SV=1	6.31208	6.10744	0.86502	0.96758	-0.0812835
A0A8I6XAP9	>tr|A0A8I6XAP9|A0A8I6XAP9_HORVV Mitochondrial glycoprotein OS=Hordeum vulgare subsp. vulgare OX=112509 PE=4 SV=1	3.08567	2.78693	0.306129	0.903185	-0.25114
A0A8I6XAQ0	>tr|A0A8I6XAQ0|A0A8I6XAQ0_HORVV Methanethiol oxidase OS=Hordeum vulgare subsp. vulgare OX=112509 PE=3 SV=1	11.8995	8.60827	0.100046	0.723414	-0.798522
A0A8I6XAT7	>tr|A0A8I6XAT7|A0A8I6XAT7_HORVV Late embryogenesis abundant protein LEA-2 subgroup domain-containing protein OS=Hordeum vulgare subsp. vulgare OX=112509 PE=4 SV=1	0.527807	0.425031	0.52412	0.805278	-0.534121
A0A8I6XAW1	>tr|A0A8I6XAW1|A0A8I6XAW1_HORVV Polygalacturonase OS=Hordeum vulgare subsp. vulgare OX=112509 PE=3 SV=1	0.631899	0.237548	0.02755	0.375928	-2.41293
A0A8I6XAZ3	>tr|A0A8I6XAZ3|A0A8I6XAZ3_HORVV Protein FATTY ACID EXPORT 3, chloroplastic OS=Hordeum vulgare subsp. vulgare OX=112509 PE=4 SV=1	1.3778	1.79991	0.359964	1.30636	0.659108
A0A8I6XB06	>tr|A0A8I6XB06|A0A8I6XB06_HORVV Subtilisin-chymotrypsin inhibitor-2A OS=Hordeum vulgare subsp. vulgare OX=112509 PE=3 SV=1	0.387673	0.378659	0.925454	0.976747	-0.0580256
A0A8I6XB38	>tr|A0A8I6XB38|A0A8I6XB38_HORVV NAD(P)-binding Rossmann-fold superfamily protein OS=Hordeum vulgare subsp. vulgare OX=112509 PE=3 SV=1	0.820203	1.02498	0.269836	1.24967	0.549689
A0A8I6XB73	>tr|A0A8I6XB73|A0A8I6XB73_HORVV Pectin acetylesterase OS=Hordeum vulgare subsp. vulgare OX=112509 PE=3 SV=1	1.31799	1.60526	0.129856	1.21797	0.48631
A0A8I6XB86	>tr|A0A8I6XB86|A0A8I6XB86_HORVV IST1-like protein OS=Hordeum vulgare subsp. vulgare OX=112509 PE=3 SV=1	0.882913	0.644981	0.128103	0.730514	-0.774435
A0A8I6XB91	>tr|A0A8I6XB91|A0A8I6XB91_HORVV ethanolamine-phosphate cytidylyltransferase OS=Hordeum vulgare subsp. vulgare OX=112509 PE=3 SV=1	0.573578	0.518987	0.408393	0.904825	-0.246665
A0A8I6XBA2	>tr|A0A8I6XBA2|A0A8I6XBA2_HORVV EF-hand domain-containing protein OS=Hordeum vulgare subsp. vulgare OX=112509 PE=4 SV=1	3.20672	2.34075	0.207898	0.729951	-0.776337
A0A8I6XBA4	>tr|A0A8I6XBA4|A0A8I6XBA4_HORVV glutathione transferase OS=Hordeum vulgare subsp. vulgare OX=112509 PE=3 SV=1	1.37184	1.35401	0.976784	0.987004	-0.0322612
A0A8I6XBB9	>tr|A0A8I6XBB9|A0A8I6XBB9_HORVV 23 kDa jasmonate-induced protein OS=Hordeum vulgare subsp. vulgare OX=112509 PE=4 SV=1	1.23996	2.35553	0.522093	1.89969	1.5826
A0A8I6XBD2	>tr|A0A8I6XBD2|A0A8I6XBD2_HORVV Stress-response A/B barrel domain-containing protein OS=Hordeum vulgare subsp. vulgare OX=112509 PE=4 SV=1	0.640862	0.323145	0.0113848	0.504235	-1.68871
A0A8I6XBF6	>tr|A0A8I6XBF6|A0A8I6XBF6_HORVV dihydrolipoyllysine-residue succinyltransferase OS=Hordeum vulgare subsp. vulgare OX=112509 PE=3 SV=1	4.65688	3.57329	0.320589	0.767315	-0.65322
A0A8I6XBH2	>tr|A0A8I6XBH2|A0A8I6XBH2_HORVV Ran guanine nucleotide release factor OS=Hordeum vulgare subsp. vulgare OX=112509 PE=3 SV=1	0.536963	0.428538	0.400888	0.798077	-0.556274
A0A8I6XBL0	>tr|A0A8I6XBL0|A0A8I6XBL0_HORVV PUM-HD domain-containing protein OS=Hordeum vulgare subsp. vulgare OX=112509 PE=4 SV=1	0.796204	0.666923	0.277196	0.837629	-0.436981
A0A8I6XBL4	>tr|A0A8I6XBL4|A0A8I6XBL4_HORVV Co-chaperone protein p23 OS=Hordeum vulgare subsp. vulgare OX=112509 PE=3 SV=1	1.01704	0.824097	0.140869	0.810287	-0.518828
A0A8I6XBL5	>tr|A0A8I6XBL5|A0A8I6XBL5_HORVV peptidylprolyl isomerase OS=Hordeum vulgare subsp. vulgare OX=112509 PE=4 SV=1	0.72635	0.623324	0.25567	0.858159	-0.37726
A0A8I6XBL9	>tr|A0A8I6XBL9|A0A8I6XBL9_HORVV RNA helicase OS=Hordeum vulgare subsp. vulgare OX=112509 PE=3 SV=1	0.878245	0.636198	0.288907	0.724396	-0.795177
A0A8I6XBP3	>tr|A0A8I6XBP3|A0A8I6XBP3_HORVV Phosphotransferase OS=Hordeum vulgare subsp. vulgare OX=112509 PE=3 SV=1	0.239325	0.150335	0.253461	0.628162	-1.14673
A0A8I6XBP5	>tr|A0A8I6XBP5|A0A8I6XBP5_HORVV MRP-like ABC transporter OS=Hordeum vulgare subsp. vulgare OX=112509 PE=3 SV=1	0.584244	0.606057	0.891619	1.03734	0.0904031
A0A8I6XBR0	>tr|A0A8I6XBR0|A0A8I6XBR0_HORVV Glycerol-3-phosphate dehydrogenase OS=Hordeum vulgare subsp. vulgare OX=112509 PE=3 SV=1	0.594694	0.692451	0.429777	1.16438	0.375346
A0A8I6XBR3	>tr|A0A8I6XBR3|A0A8I6XBR3_HORVV Uncharacterized protein OS=Hordeum vulgare subsp. vulgare OX=112509 PE=4 SV=1	1.6257	1.42432	0.841264	0.876127	-0.326155
A0A8I6XBU5	>tr|A0A8I6XBU5|A0A8I6XBU5_HORVV HP domain-containing protein OS=Hordeum vulgare subsp. vulgare OX=112509 PE=3 SV=1	0.326331	0.257355	0.566154	0.788631	-0.585642
A0A8I6XBW3	>tr|A0A8I6XBW3|A0A8I6XBW3_HORVV W2 domain-containing protein OS=Hordeum vulgare subsp. vulgare OX=112509 PE=3 SV=1	3.17406	2.54987	0.150447	0.803347	-0.540043
A0A8I6XBW8	>tr|A0A8I6XBW8|A0A8I6XBW8_HORVV Fructose-bisphosphate aldolase OS=Hordeum vulgare subsp. vulgare OX=112509 PE=3 SV=1	1.89454	2.03839	0.507622	1.07593	0.180494
A0A8I6XBZ3	>tr|A0A8I6XBZ3|A0A8I6XBZ3_HORVV Alpha/beta hydrolase fold-3 domain-containing protein OS=Hordeum vulgare subsp. vulgare OX=112509 PE=4 SV=1	2.3015	0.541241	0.44449	0.235169	-3.56985
A0A8I6XC12	>tr|A0A8I6XC12|A0A8I6XC12_HORVV RRM domain-containing protein OS=Hordeum vulgare subsp. vulgare OX=112509 PE=4 SV=1	0.947103	0.875709	0.275487	0.924619	-0.193294
A0A8I6XC32	>tr|A0A8I6XC32|A0A8I6XC32_HORVV Threonine dehydratase OS=Hordeum vulgare subsp. vulgare OX=112509 PE=3 SV=1	1.50479	1.335	0.555737	0.887171	-0.29526
A0A8I6XC39	>tr|A0A8I6XC39|A0A8I6XC39_HORVV NADH-cytochrome b5 reductase OS=Hordeum vulgare subsp. vulgare OX=112509 PE=3 SV=1	3.46402	3.28483	0.300493	0.94827	-0.131001
A0A8I6XC77	>tr|A0A8I6XC77|A0A8I6XC77_HORVV PWWP domain-containing protein OS=Hordeum vulgare subsp. vulgare OX=112509 PE=4 SV=1	0.811088	0.874469	0.625346	1.07814	0.185566
A0A8I6XC92	>tr|A0A8I6XC92|A0A8I6XC92_HORVV Acyl-[acyl-carrier-protein] desaturase OS=Hordeum vulgare subsp. vulgare OX=112509 PE=3 SV=1	2.36475	2.20655	0.681379	0.933103	-0.170766
A0A8I6XCC1	>tr|A0A8I6XCC1|A0A8I6XCC1_HORVV phosphoribosylaminoimidazole carboxylase OS=Hordeum vulgare subsp. vulgare OX=112509 PE=3 SV=1	0.773212	0.86739	0.610322	1.1218	0.283467
A0A8I6XCC4	>tr|A0A8I6XCC4|A0A8I6XCC4_HORVV PI31 proteasome regulator N-terminal domain-containing protein OS=Hordeum vulgare subsp. vulgare OX=112509 PE=3 SV=1	0.715876	0.603193	0.495792	0.842594	-0.422403
A0A8I6XCC9	>tr|A0A8I6XCC9|A0A8I6XCC9_HORVV Gamma-soluble NSF attachment protein OS=Hordeum vulgare subsp. vulgare OX=112509 PE=3 SV=1	1.82455	2.05073	0.0571695	1.12396	0.288217
A0A8I6XCF1	>tr|A0A8I6XCF1|A0A8I6XCF1_HORVV Vacuolar protein sorting-associated protein 51 homolog OS=Hordeum vulgare subsp. vulgare OX=112509 PE=3 SV=1	0.648655	0.744844	0.208455	1.14829	0.341023
A0A8I6XCF5	>tr|A0A8I6XCF5|A0A8I6XCF5_HORVV Lon protease homolog, mitochondrial OS=Hordeum vulgare subsp. vulgare OX=112509 PE=3 SV=1	1.8152	2.5476	0.33002	1.40348	0.835961
A0A8I6XCG6	>tr|A0A8I6XCG6|A0A8I6XCG6_HORVV proline--tRNA ligase OS=Hordeum vulgare subsp. vulgare OX=112509 PE=3 SV=1	2.13534	2.07694	0.885865	0.972649	-0.0683955
A0A8I6XCH7	>tr|A0A8I6XCH7|A0A8I6XCH7_HORVV O-methyltransferase OS=Hordeum vulgare subsp. vulgare OX=112509 PE=4 SV=1	0.533715	0.453046	0.427664	0.848853	-0.404151
A0A8I6XCN2	>tr|A0A8I6XCN2|A0A8I6XCN2_HORVV Actin-related protein 2/3 complex subunit 5 OS=Hordeum vulgare subsp. vulgare OX=112509 PE=3 SV=1	0.655066	0.40927	0.381295	0.624777	-1.16005
A0A8I6XCN9	>tr|A0A8I6XCN9|A0A8I6XCN9_HORVV GPN-loop GTPase OS=Hordeum vulgare subsp. vulgare OX=112509 PE=3 SV=1	0.8588	0.876843	0.876552	1.02101	0.0512783
A0A8I6XCP7	>tr|A0A8I6XCP7|A0A8I6XCP7_HORVV Phytochrome OS=Hordeum vulgare subsp. vulgare OX=112509 PE=3 SV=1	0.768715	0.590056	0.222351	0.767587	-0.652346
A0A8I6XCQ2	>tr|A0A8I6XCQ2|A0A8I6XCQ2_HORVV Acyl-CoA dehydrogenase family member 11 OS=Hordeum vulgare subsp. vulgare OX=112509 PE=3 SV=1	0.743135	0.836914	0.767093	1.12619	0.293105
A0A8I6XCR3	>tr|A0A8I6XCR3|A0A8I6XCR3_HORVV VHS domain-containing protein OS=Hordeum vulgare subsp. vulgare OX=112509 PE=4 SV=1	0.977625	0.723118	0.350983	0.739668	-0.743724
A0A8I6XCS4	>tr|A0A8I6XCS4|A0A8I6XCS4_HORVV Coiled-coil domain-containing protein SCD2 OS=Hordeum vulgare subsp. vulgare OX=112509 PE=4 SV=1	0.643466	0.739064	0.84173	1.14857	0.34162
A0A8I6XCS9	>tr|A0A8I6XCS9|A0A8I6XCS9_HORVV Importin N-terminal domain-containing protein OS=Hordeum vulgare subsp. vulgare OX=112509 PE=3 SV=1	2.50377	0.651959	0.278436	0.260391	-3.31859
A0A8I6XCW4	>tr|A0A8I6XCW4|A0A8I6XCW4_HORVV Malonyl-CoA:ACP transacylase (MAT) domain-containing protein OS=Hordeum vulgare subsp. vulgare OX=112509 PE=4 SV=1	1.02217	0.863366	0.257019	0.844643	-0.416414
A0A8I6XCZ3	>tr|A0A8I6XCZ3|A0A8I6XCZ3_HORVV t-SNARE coiled-coil homology domain-containing protein OS=Hordeum vulgare subsp. vulgare OX=112509 PE=3 SV=1	0.429906	0.248005	0.195946	0.576881	-1.35676
A0A8I6XCZ6	>tr|A0A8I6XCZ6|A0A8I6XCZ6_HORVV Nop domain-containing protein OS=Hordeum vulgare subsp. vulgare OX=112509 PE=3 SV=1	2.54096	2.20077	0.549217	0.866119	-0.354488
A0A8I6XD03	>tr|A0A8I6XD03|A0A8I6XD03_HORVV MGS-like domain-containing protein OS=Hordeum vulgare subsp. vulgare OX=112509 PE=3 SV=1	0.843301	1.28859	0.321618	1.52803	1.04566
A0A8I6XD13	>tr|A0A8I6XD13|A0A8I6XD13_HORVV AB hydrolase-1 domain-containing protein OS=Hordeum vulgare subsp. vulgare OX=112509 PE=4 SV=1	0.533167	0.400556	0.605211	0.751277	-0.705317
A0A8I6XD39	>tr|A0A8I6XD39|A0A8I6XD39_HORVV Anaphase-promoting complex subunit 4 WD40 domain-containing protein OS=Hordeum vulgare subsp. vulgare OX=112509 PE=4 SV=1	0.783186	0.808336	0.794383	1.03211	0.0779526
A0A8I6XD40	>tr|A0A8I6XD40|A0A8I6XD40_HORVV RRM domain-containing protein OS=Hordeum vulgare subsp. vulgare OX=112509 PE=4 SV=1	0.951166	0.798949	0.275346	0.839968	-0.430102
A0A8I6XD94	>tr|A0A8I6XD94|A0A8I6XD94_HORVV Uncharacterized protein OS=Hordeum vulgare subsp. vulgare OX=112509 PE=4 SV=1	1.15868	1.29512	0.751166	1.11775	0.274542
A0A8I6XDB4	>tr|A0A8I6XDB4|A0A8I6XDB4_HORVV C3H1-type domain-containing protein OS=Hordeum vulgare subsp. vulgare OX=112509 PE=4 SV=1	1.00734	0.914208	0.402632	0.907548	-0.239254
A0A8I6XDB8	>tr|A0A8I6XDB8|A0A8I6XDB8_HORVV Vacuolar protein sorting-associated protein 45 homolog OS=Hordeum vulgare subsp. vulgare OX=112509 PE=3 SV=1	1.55622	1.84485	0.281023	1.18547	0.419608
A0A8I6XDE1	>tr|A0A8I6XDE1|A0A8I6XDE1_HORVV BI1-like protein OS=Hordeum vulgare subsp. vulgare OX=112509 PE=3 SV=1	0.421509	0.436637	0.872279	1.03589	0.0869648
A0A8I6XDG3	>tr|A0A8I6XDG3|A0A8I6XDG3_HORVV DDRGK domain-containing protein 1 OS=Hordeum vulgare subsp. vulgare OX=112509 PE=4 SV=1	1.26878	0.618283	0.427446	0.487304	-1.77295
A0A8I6XDJ9	>tr|A0A8I6XDJ9|A0A8I6XDJ9_HORVV Aminotransferase class V domain-containing protein OS=Hordeum vulgare subsp. vulgare OX=112509 PE=4 SV=1	0.899626	0.829881	0.642364	0.922473	-0.199024
A0A8I6XDK8	>tr|A0A8I6XDK8|A0A8I6XDK8_HORVV Essential protein Yae1 N-terminal domain-containing protein OS=Hordeum vulgare subsp. vulgare OX=112509 PE=4 SV=1	3.30238	5.96514	0.054987	1.80632	1.4583
A0A8I6XDN6	>tr|A0A8I6XDN6|A0A8I6XDN6_HORVV Isocitrate dehydrogenase [NADP] OS=Hordeum vulgare subsp. vulgare OX=112509 PE=3 SV=1	1.07017	1.21391	0.758322	1.13431	0.310814
A0A8I6XDR0	>tr|A0A8I6XDR0|A0A8I6XDR0_HORVV Caleosin OS=Hordeum vulgare subsp. vulgare OX=112509 PE=3 SV=1	33.2806	28.708	0.176572	0.862606	-0.364513
A0A8I6XDU2	>tr|A0A8I6XDU2|A0A8I6XDU2_HORVV 3-hydroxyacyl-[acyl-carrier-protein] dehydratase OS=Hordeum vulgare subsp. vulgare OX=112509 PE=3 SV=1	2.8649	2.48188	0.858648	0.866306	-0.353957
A0A8I6XDV2	>tr|A0A8I6XDV2|A0A8I6XDV2_HORVV HMA domain-containing protein OS=Hordeum vulgare subsp. vulgare OX=112509 PE=3 SV=1	8.17543	7.95483	0.848317	0.973016	-0.0674643
A0A8I6XE10	>tr|A0A8I6XE10|A0A8I6XE10_HORVV Ferrochelatase OS=Hordeum vulgare subsp. vulgare OX=112509 PE=3 SV=1	0.762881	0.842426	0.845947	1.10427	0.244618
A0A8I6XE20	>tr|A0A8I6XE20|A0A8I6XE20_HORVV ATP synthase subunit d, mitochondrial OS=Hordeum vulgare subsp. vulgare OX=112509 PE=3 SV=1	15.9994	14.4028	0.397794	0.900211	-0.259272
A0A8I6XE69	>tr|A0A8I6XE69|A0A8I6XE69_HORVV CBS domain-containing protein OS=Hordeum vulgare subsp. vulgare OX=112509 PE=4 SV=1	1.461	1.30518	0.801469	0.893346	-0.278153
A0A8I6XE83	>tr|A0A8I6XE83|A0A8I6XE83_HORVV Legumain prodomain domain-containing protein OS=Hordeum vulgare subsp. vulgare OX=112509 PE=3 SV=1	0.547373	0.696453	0.682869	1.27236	0.594059
A0A8I6XEC2	>tr|A0A8I6XEC2|A0A8I6XEC2_HORVV Vacuolar protein sorting-associated protein 26 OS=Hordeum vulgare subsp. vulgare OX=112509 PE=3 SV=1	0.47122	0.888131	0.0919574	1.88475	1.56313
A0A8I6XEF6	>tr|A0A8I6XEF6|A0A8I6XEF6_HORVV Eukaryotic translation initiation factor 5A OS=Hordeum vulgare subsp. vulgare OX=112509 PE=3 SV=1	3.94417	2.12388	0.000219151	0.538484	-1.52663
A0A8I6XEF9	>tr|A0A8I6XEF9|A0A8I6XEF9_HORVV Bifunctional inhibitor/plant lipid transfer protein/seed storage helical domain-containing protein OS=Hordeum vulgare subsp. vulgare OX=112509 PE=4 SV=1	1.13508	0.843205	0.224612	0.74286	-0.733105
A0A8I6XEI7	>tr|A0A8I6XEI7|A0A8I6XEI7_HORVV SHSP domain-containing protein OS=Hordeum vulgare subsp. vulgare OX=112509 PE=3 SV=1	8.75722	10.0563	0.195408	1.14834	0.341143
A0A8I6XEJ1	>tr|A0A8I6XEJ1|A0A8I6XEJ1_HORVV inositol-3-phosphate synthase OS=Hordeum vulgare subsp. vulgare OX=112509 PE=3 SV=1	0.513835	0.560413	0.828151	1.09065	0.214008
A0A8I6XEM6	>tr|A0A8I6XEM6|A0A8I6XEM6_HORVV TAFII55 protein conserved region domain-containing protein OS=Hordeum vulgare subsp. vulgare OX=112509 PE=3 SV=1	0.449379	0.740692	0.0539935	1.64826	1.23246
A0A8I6XEP7	>tr|A0A8I6XEP7|A0A8I6XEP7_HORVV Ubiquitin fusion degradation protein 1 homolog OS=Hordeum vulgare subsp. vulgare OX=112509 PE=4 SV=1	0.652562	0.555149	0.377698	0.850722	-0.398728
A0A8I6XEP8	>tr|A0A8I6XEP8|A0A8I6XEP8_HORVV SHSP domain-containing protein OS=Hordeum vulgare subsp. vulgare OX=112509 PE=4 SV=1	0.540274	0.422887	0.241095	0.782726	-0.604177
A0A8I6XEP9	>tr|A0A8I6XEP9|A0A8I6XEP9_HORVV Costars domain-containing protein OS=Hordeum vulgare subsp. vulgare OX=112509 PE=3 SV=1	1.84164	1.50998	0.17288	0.81991	-0.48971
A0A8I6XEQ7	>tr|A0A8I6XEQ7|A0A8I6XEQ7_HORVV Germin-like protein OS=Hordeum vulgare subsp. vulgare OX=112509 PE=3 SV=1	18.5664	18.245	0.91145	0.982689	-0.0430683
A0A8I6XES0	>tr|A0A8I6XES0|A0A8I6XES0_HORVV GBF-interacting protein 1 N-terminal domain-containing protein OS=Hordeum vulgare subsp. vulgare OX=112509 PE=4 SV=1	4.73886	2.62219	0.0876192	0.553339	-1.45952
A0A8I6XET6	>tr|A0A8I6XET6|A0A8I6XET6_HORVV Aldehyde dehydrogenase domain-containing protein OS=Hordeum vulgare subsp. vulgare OX=112509 PE=3 SV=1	2.33435	1.77234	0.174838	0.759244	-0.679297
A0A8I6XEV6	>tr|A0A8I6XEV6|A0A8I6XEV6_HORVV Uncharacterized protein OS=Hordeum vulgare subsp. vulgare OX=112509 PE=4 SV=1	0.501559	0.437633	0.75467	0.872547	-0.336253
A0A8I6XEW3	>tr|A0A8I6XEW3|A0A8I6XEW3_HORVV Small nuclear ribonucleoprotein Sm D1 OS=Hordeum vulgare subsp. vulgare OX=112509 PE=3 SV=1	0.545586	0.524896	0.68567	0.962077	-0.095348
A0A8I6XEY0	>tr|A0A8I6XEY0|A0A8I6XEY0_HORVV Protein kinase domain-containing protein OS=Hordeum vulgare subsp. vulgare OX=112509 PE=4 SV=1	0.372876	0.347709	0.899073	0.932507	-0.172343
A0A8I6XF00	>tr|A0A8I6XF00|A0A8I6XF00_HORVV 5-methyltetrahydropteroyltriglutamate--homocysteine S-methyltransferase OS=Hordeum vulgare subsp. vulgare OX=112509 PE=3 SV=1	6.31938	5.52728	0.450892	0.874656	-0.330298
A0A8I6XF02	>tr|A0A8I6XF02|A0A8I6XF02_HORVV Matrin-type domain-containing protein OS=Hordeum vulgare subsp. vulgare OX=112509 PE=3 SV=1	0.719475	0.363977	0.0548877	0.505893	-1.68061
A0A8I6XF13	>tr|A0A8I6XF13|A0A8I6XF13_HORVV Chalcone--flavanone isomerase OS=Hordeum vulgare subsp. vulgare OX=112509 PE=3 SV=1	1.78929	1.99129	0.288827	1.11289	0.263806
A0A8I6XF19	>tr|A0A8I6XF19|A0A8I6XF19_HORVV MI domain-containing protein OS=Hordeum vulgare subsp. vulgare OX=112509 PE=3 SV=1	3.33007	2.61989	0.355197	0.786738	-0.591567
A0A8I6XF91	>tr|A0A8I6XF91|A0A8I6XF91_HORVV Uncharacterized protein OS=Hordeum vulgare subsp. vulgare OX=112509 PE=4 SV=1	0.598902	0.743072	0.634643	1.24072	0.531969
A0A8I6XFC8	>tr|A0A8I6XFC8|A0A8I6XFC8_HORVV 4-hydroxy-7-methoxy-3-oxo-3,4-dihydro-2H-1,4-benzoxazin-2-yl glucosidebeta-D-glucosidase OS=Hordeum vulgare subsp. vulgare OX=112509 PE=3 SV=1	0.954207	0.92374	0.908751	0.968071	-0.0800307
A0A8I6XFH2	>tr|A0A8I6XFH2|A0A8I6XFH2_HORVV mitogen-activated protein kinase kinase OS=Hordeum vulgare subsp. vulgare OX=112509 PE=3 SV=1	0.67125	0.599667	0.73479	0.893359	-0.278117
A0A8I6XFJ2	>tr|A0A8I6XFJ2|A0A8I6XFJ2_HORVV fumarate hydratase OS=Hordeum vulgare subsp. vulgare OX=112509 PE=3 SV=1	1.73548	1.55399	0.492608	0.895422	-0.272428
A0A8I6XFM0	>tr|A0A8I6XFM0|A0A8I6XFM0_HORVV Isocitrate lyase OS=Hordeum vulgare subsp. vulgare OX=112509 PE=3 SV=1	0.730087	1.252	0.360163	1.71487	1.33017
A0A8I6XFM9	>tr|A0A8I6XFM9|A0A8I6XFM9_HORVV ATP phosphoribosyltransferase OS=Hordeum vulgare subsp. vulgare OX=112509 PE=3 SV=1	0.750789	0.827259	0.416533	1.10185	0.239214
A0A8I6XFP0	>tr|A0A8I6XFP0|A0A8I6XFP0_HORVV SCP domain-containing protein OS=Hordeum vulgare subsp. vulgare OX=112509 PE=4 SV=1	0.434565	0.470538	0.770209	1.08278	0.196147
A0A8I6XFQ6	>tr|A0A8I6XFQ6|A0A8I6XFQ6_HORVV Short-chain dehydrogenase/reductase OS=Hordeum vulgare subsp. vulgare OX=112509 PE=3 SV=1	0.706378	0.781201	0.720565	1.10593	0.248315
A0A8I6XFW5	>tr|A0A8I6XFW5|A0A8I6XFW5_HORVV PCI domain-containing protein OS=Hordeum vulgare subsp. vulgare OX=112509 PE=3 SV=1	3.8868	3.17718	0.228511	0.817429	-0.497186
A0A8I6XG13	>tr|A0A8I6XG13|A0A8I6XG13_HORVV Eukaryotic translation initiation factor 3 subunit B OS=Hordeum vulgare subsp. vulgare OX=112509 PE=3 SV=1	0.936621	0.903449	0.838244	0.964583	-0.0889327
A0A8I6XG34	>tr|A0A8I6XG34|A0A8I6XG34_HORVV Protein transport protein SEC23 OS=Hordeum vulgare subsp. vulgare OX=112509 PE=3 SV=1	0.85447	0.925237	0.349422	1.08282	0.196241
A0A8I6XG35	>tr|A0A8I6XG35|A0A8I6XG35_HORVV HMG box domain-containing protein OS=Hordeum vulgare subsp. vulgare OX=112509 PE=4 SV=1	3.7688	3.19341	0.261937	0.847329	-0.408584
A0A8I6XG95	>tr|A0A8I6XG95|A0A8I6XG95_HORVV Protein transport protein Sec24-like CEF OS=Hordeum vulgare subsp. vulgare OX=112509 PE=3 SV=1	2.25409	1.43083	0.31688	0.634772	-1.12091
A0A8I6XGH4	>tr|A0A8I6XGH4|A0A8I6XGH4_HORVV Arf-GAP domain-containing protein OS=Hordeum vulgare subsp. vulgare OX=112509 PE=4 SV=1	0.560958	0.57847	0.699036	1.03122	0.0758148
A0A8I6XGJ1	>tr|A0A8I6XGJ1|A0A8I6XGJ1_HORVV Uncharacterized protein OS=Hordeum vulgare subsp. vulgare OX=112509 PE=4 SV=1	1.3678	0.63924	0.0934127	0.46735	-1.87606
A0A8I6XGK1	>tr|A0A8I6XGK1|A0A8I6XGK1_HORVV HMA domain-containing protein OS=Hordeum vulgare subsp. vulgare OX=112509 PE=3 SV=1	2.67991	2.69371	0.967238	1.00515	0.0126645
A0A8I6XGL3	>tr|A0A8I6XGL3|A0A8I6XGL3_HORVV DNA/RNA-binding protein Alba-like domain-containing protein OS=Hordeum vulgare subsp. vulgare OX=112509 PE=3 SV=1	0.600447	0.72442	0.523217	1.20647	0.462918
A0A8I6XGQ8	>tr|A0A8I6XGQ8|A0A8I6XGQ8_HORVV J domain-containing protein OS=Hordeum vulgare subsp. vulgare OX=112509 PE=4 SV=1	0.659732	0.564063	0.105116	0.854989	-0.386388
A0A8I6XGR3	>tr|A0A8I6XGR3|A0A8I6XGR3_HORVV Tr-type G domain-containing protein OS=Hordeum vulgare subsp. vulgare OX=112509 PE=3 SV=1	0.64461	0.600994	0.46256	0.932338	-0.17279
A0A8I6XGW9	>tr|A0A8I6XGW9|A0A8I6XGW9_HORVV EGF-like calcium-binding domain-containing protein OS=Hordeum vulgare subsp. vulgare OX=112509 PE=3 SV=1	0.614708	0.500092	0.256666	0.813543	-0.508937
A0A8I6XGX1	>tr|A0A8I6XGX1|A0A8I6XGX1_HORVV GRF-type domain-containing protein OS=Hordeum vulgare subsp. vulgare OX=112509 PE=4 SV=1	1.01749	1.12066	0.383113	1.10139	0.238182
A0A8I6XGX5	>tr|A0A8I6XGX5|A0A8I6XGX5_HORVV Hikeshi-like domain-containing protein OS=Hordeum vulgare subsp. vulgare OX=112509 PE=3 SV=1	2.33772	1.73147	0.260597	0.740665	-0.7404
A0A8I6XH17	>tr|A0A8I6XH17|A0A8I6XH17_HORVV Ferritin OS=Hordeum vulgare subsp. vulgare OX=112509 PE=3 SV=1	0.847769	3.71674	0.363754	4.38414	3.64518
A0A8I6XH22	>tr|A0A8I6XH22|A0A8I6XH22_HORVV Dolichyl-diphosphooligosaccharide--protein glycosyltransferase subunit 1 OS=Hordeum vulgare subsp. vulgare OX=112509 PE=3 SV=1	0.498432	0.34915	0.571302	0.700497	-0.877918
A0A8I6XH40	>tr|A0A8I6XH40|A0A8I6XH40_HORVV RRM domain-containing protein OS=Hordeum vulgare subsp. vulgare OX=112509 PE=4 SV=1	0.632508	0.489406	0.644405	0.773754	-0.632609
A0A8I6XH57	>tr|A0A8I6XH57|A0A8I6XH57_HORVV Glucosidase II subunit alpha OS=Hordeum vulgare subsp. vulgare OX=112509 PE=3 SV=1	0.689259	1.06608	0.346236	1.54671	1.07563
A0A8I6XH78	>tr|A0A8I6XH78|A0A8I6XH78_HORVV Chorein N-terminal domain-containing protein OS=Hordeum vulgare subsp. vulgare OX=112509 PE=4 SV=1	0.559004	0.442289	0.453236	0.79121	-0.577588
A0A8I6XHA6	>tr|A0A8I6XHA6|A0A8I6XHA6_HORVV X8 domain-containing protein OS=Hordeum vulgare subsp. vulgare OX=112509 PE=3 SV=1	1.47513	1.09914	0.339428	0.745116	-0.725623
A0A8I6XHB9	>tr|A0A8I6XHB9|A0A8I6XHB9_HORVV Reticulon-like protein OS=Hordeum vulgare subsp. vulgare OX=112509 PE=4 SV=1	0.939703	0.657981	0.322011	0.700201	-0.87896
A0A8I6XHC6	>tr|A0A8I6XHC6|A0A8I6XHC6_HORVV NADP-dependent oxidoreductase domain-containing protein OS=Hordeum vulgare subsp. vulgare OX=112509 PE=4 SV=1	2.88842	3.46327	0.427656	1.19902	0.44764
A0A8I6XHD2	>tr|A0A8I6XHD2|A0A8I6XHD2_HORVV phosphopyruvate hydratase OS=Hordeum vulgare subsp. vulgare OX=112509 PE=3 SV=1	0.44091	0.299423	0.449348	0.679101	-0.954425
A0A8I6XHF5	>tr|A0A8I6XHF5|A0A8I6XHF5_HORVV SMP domain-containing protein OS=Hordeum vulgare subsp. vulgare OX=112509 PE=4 SV=1	15.2229	13.5591	0.521362	0.890704	-0.285459
A0A8I6XHL4	>tr|A0A8I6XHL4|A0A8I6XHL4_HORVV NADPH--cytochrome P450 reductase OS=Hordeum vulgare subsp. vulgare OX=112509 PE=3 SV=1	0.628195	0.4927	0.615025	0.784311	-0.599187
A0A8I6XHL7	>tr|A0A8I6XHL7|A0A8I6XHL7_HORVV Tropinone reductase homolog OS=Hordeum vulgare subsp. vulgare OX=112509 PE=4 SV=1	0.678048	0.481788	0.344071	0.710552	-0.842768
A0A8I6XHQ7	>tr|A0A8I6XHQ7|A0A8I6XHQ7_HORVV Reticulon-like protein OS=Hordeum vulgare subsp. vulgare OX=112509 PE=3 SV=1	0.595683	0.523626	0.288704	0.879035	-0.317983
A0A8I6XHT9	>tr|A0A8I6XHT9|A0A8I6XHT9_HORVV Outer envelope pore protein 16-2, chloroplastic OS=Hordeum vulgare subsp. vulgare OX=112509 PE=4 SV=1	7.66639	8.106	0.602548	1.05734	0.137517
A0A8I6XI22	>tr|A0A8I6XI22|A0A8I6XI22_HORVV cysteine dioxygenase OS=Hordeum vulgare subsp. vulgare OX=112509 PE=3 SV=1	0.640245	0.542928	0.66915	0.848	-0.406631
A0A8I6XI28	>tr|A0A8I6XI28|A0A8I6XI28_HORVV Casein kinase II subunit alpha OS=Hordeum vulgare subsp. vulgare OX=112509 PE=3 SV=1	0.855584	0.823162	0.82596	0.962105	-0.0952771
A0A8I6XI44	>tr|A0A8I6XI44|A0A8I6XI44_HORVV Clathrin light chain OS=Hordeum vulgare subsp. vulgare OX=112509 PE=3 SV=1	4.41229	3.48464	0.181542	0.789757	-0.582122
A0A8I6XI70	>tr|A0A8I6XI70|A0A8I6XI70_HORVV Sucrose-phosphate synthase OS=Hordeum vulgare subsp. vulgare OX=112509 PE=3 SV=1	1.77416	1.62978	0.630723	0.918618	-0.209352
A0A8I6XI72	>tr|A0A8I6XI72|A0A8I6XI72_HORVV Thioredoxin domain-containing protein OS=Hordeum vulgare subsp. vulgare OX=112509 PE=4 SV=1	0.51407	0.519407	0.974324	1.01038	0.0254746
A0A8I6XI84	>tr|A0A8I6XI84|A0A8I6XI84_HORVV Uncharacterized protein OS=Hordeum vulgare subsp. vulgare OX=112509 PE=4 SV=1	2.92306	1.86966	0.10427	0.639623	-1.10213
A0A8I6XI87	>tr|A0A8I6XI87|A0A8I6XI87_HORVV Uncharacterized protein OS=Hordeum vulgare subsp. vulgare OX=112509 PE=4 SV=1	1.4076	1.82409	0.419895	1.29588	0.639247
A0A8I6XIA0	>tr|A0A8I6XIA0|A0A8I6XIA0_HORVV Neprosin domain-containing protein OS=Hordeum vulgare subsp. vulgare OX=112509 PE=4 SV=1	0.517987	0.910503	0.0355247	1.75777	1.39111
A0A8I6XIF6	>tr|A0A8I6XIF6|A0A8I6XIF6_HORVV S-methyl-5-thioribose kinase OS=Hordeum vulgare subsp. vulgare OX=112509 PE=3 SV=1	0.893514	1.62236	0.429046	1.81571	1.4711
A0A8I6XIJ0	>tr|A0A8I6XIJ0|A0A8I6XIJ0_HORVV Nudix hydrolase domain-containing protein OS=Hordeum vulgare subsp. vulgare OX=112509 PE=3 SV=1	2.75616	2.4096	0.294266	0.874261	-0.331412
A0A8I6XIK9	>tr|A0A8I6XIK9|A0A8I6XIK9_HORVV Malectin-like domain-containing protein OS=Hordeum vulgare subsp. vulgare OX=112509 PE=4 SV=1	0.962045	0.816191	0.135327	0.848392	-0.40549
A0A8I6XIR6	>tr|A0A8I6XIR6|A0A8I6XIR6_HORVV mRNA decay factor PAT1 domain-containing protein OS=Hordeum vulgare subsp. vulgare OX=112509 PE=4 SV=1	0.672929	0.710566	0.376699	1.05593	0.134223
A0A8I6XIU6	>tr|A0A8I6XIU6|A0A8I6XIU6_HORVV J domain-containing protein OS=Hordeum vulgare subsp. vulgare OX=112509 PE=4 SV=1	1.03807	0.760021	0.112177	0.73215	-0.768921
A0A8I6XIV7	>tr|A0A8I6XIV7|A0A8I6XIV7_HORVV CDP-diacylglycerol--glycerol-3-phosphate 3-phosphatidyltransferase OS=Hordeum vulgare subsp. vulgare OX=112509 PE=3 SV=1	0.533426	0.363817	0.161444	0.682037	-0.943783
A0A8I6XIW4	>tr|A0A8I6XIW4|A0A8I6XIW4_HORVV RRM domain-containing protein OS=Hordeum vulgare subsp. vulgare OX=112509 PE=4 SV=1	0.53662	0.482647	0.824167	0.89942	-0.261441
A0A8I6XJ17	>tr|A0A8I6XJ17|A0A8I6XJ17_HORVV Glycosyltransferase 7 OS=Hordeum vulgare subsp. vulgare OX=112509 PE=3 SV=1	0.548941	1.43305	0.347322	2.61058	2.3666
A0A8I6XJ20	>tr|A0A8I6XJ20|A0A8I6XJ20_HORVV Uncharacterized protein OS=Hordeum vulgare subsp. vulgare OX=112509 PE=4 SV=1	0.675258	0.61799	0.402578	0.915192	-0.218567
A0A8I6XJ30	>tr|A0A8I6XJ30|A0A8I6XJ30_HORVV SHSP domain-containing protein OS=Hordeum vulgare subsp. vulgare OX=112509 PE=3 SV=1	7.26212	9.50767	0.206956	1.30921	0.664488
A0A8I6XJ32	>tr|A0A8I6XJ32|A0A8I6XJ32_HORVV Mitochondrial import inner membrane translocase subunit OS=Hordeum vulgare subsp. vulgare OX=112509 PE=3 SV=1	2.86337	2.78947	0.913634	0.974191	-0.0644892
A0A8I6XJ52	>tr|A0A8I6XJ52|A0A8I6XJ52_HORVV C2 domain-containing protein OS=Hordeum vulgare subsp. vulgare OX=112509 PE=3 SV=1	0.505955	0.311398	0.0717142	0.615465	-1.19709
A0A8I6XJ54	>tr|A0A8I6XJ54|A0A8I6XJ54_HORVV Importin N-terminal domain-containing protein OS=Hordeum vulgare subsp. vulgare OX=112509 PE=4 SV=1	0.59611	0.505372	0.0667084	0.847784	-0.40726
A0A8I6XJ87	>tr|A0A8I6XJ87|A0A8I6XJ87_HORVV phosphomevalonate kinase OS=Hordeum vulgare subsp. vulgare OX=112509 PE=3 SV=1	0.721367	0.904828	0.179657	1.25432	0.558856
A0A8I6XJB6	>tr|A0A8I6XJB6|A0A8I6XJB6_HORVV Plasma membrane ATPase OS=Hordeum vulgare subsp. vulgare OX=112509 PE=3 SV=1	0.828161	0.858666	0.857966	1.03683	0.0892109
A0A8I6XJC1	>tr|A0A8I6XJC1|A0A8I6XJC1_HORVV Uncharacterized protein OS=Hordeum vulgare subsp. vulgare OX=112509 PE=3 SV=1	1.09734	1.63676	0.552469	1.49156	0.986084
A0A8I6XJC7	>tr|A0A8I6XJC7|A0A8I6XJC7_HORVV ACB domain-containing protein OS=Hordeum vulgare subsp. vulgare OX=112509 PE=3 SV=1	2.30941	2.58662	0.773095	1.12004	0.279584
A0A8I6XJD4	>tr|A0A8I6XJD4|A0A8I6XJD4_HORVV CCT-theta OS=Hordeum vulgare subsp. vulgare OX=112509 PE=3 SV=1	2.37609	1.99828	0.289343	0.840997	-0.427084
A0A8I6XJF2	>tr|A0A8I6XJF2|A0A8I6XJF2_HORVV SHSP domain-containing protein OS=Hordeum vulgare subsp. vulgare OX=112509 PE=3 SV=1	0.631694	0.585587	0.696541	0.92701	-0.186922
A0A8I6XJH3	>tr|A0A8I6XJH3|A0A8I6XJH3_HORVV Thaumatin-like protein OS=Hordeum vulgare subsp. vulgare OX=112509 PE=4 SV=1	1.56151	1.54399	0.931184	0.988781	-0.0278249
A0A8I6XJN9	>tr|A0A8I6XJN9|A0A8I6XJN9_HORVV Mitotic checkpoint protein BUB3 OS=Hordeum vulgare subsp. vulgare OX=112509 PE=3 SV=1	2.67208	2.59568	0.94614	0.97141	-0.0715383
A0A8I6XJR1	>tr|A0A8I6XJR1|A0A8I6XJR1_HORVV Uncharacterized protein OS=Hordeum vulgare subsp. vulgare OX=112509 PE=4 SV=1	0.910058	1.18793	0.25329	1.30534	0.657175
A0A8I6XJW6	>tr|A0A8I6XJW6|A0A8I6XJW6_HORVV Ornithine aminotransferase OS=Hordeum vulgare subsp. vulgare OX=112509 PE=3 SV=1	0.878533	1.34114	0.708814	1.52656	1.04329
A0A8I6XK01	>tr|A0A8I6XK01|A0A8I6XK01_HORVV Uncharacterized protein OS=Hordeum vulgare subsp. vulgare OX=112509 PE=4 SV=1	1.05899	0.577773	0.447516	0.545589	-1.49431
A0A8I6XK15	>tr|A0A8I6XK15|A0A8I6XK15_HORVV Endoplasmic reticulum-Golgi intermediate compartment protein 3-like OS=Hordeum vulgare subsp. vulgare OX=112509 PE=4 SV=1	0.696579	0.780113	0.744254	1.11992	0.279328
A0A8I6XK18	>tr|A0A8I6XK18|A0A8I6XK18_HORVV Translocon-associated protein subunit beta OS=Hordeum vulgare subsp. vulgare OX=112509 PE=4 SV=1	5.605	8.57061	0.103035	1.5291	1.04739
A0A8I6XK21	>tr|A0A8I6XK21|A0A8I6XK21_HORVV Association with the SNF1 complex (ASC) domain-containing protein OS=Hordeum vulgare subsp. vulgare OX=112509 PE=3 SV=1	0.64058	0.600926	0.576533	0.938096	-0.157605
A0A8I6XK29	>tr|A0A8I6XK29|A0A8I6XK29_HORVV cytokinin dehydrogenase OS=Hordeum vulgare subsp. vulgare OX=112509 PE=3 SV=1	1.14781	1.19951	0.824124	1.04504	0.108657
A0A8I6XK34	>tr|A0A8I6XK34|A0A8I6XK34_HORVV sphinganine-1-phosphate aldolase OS=Hordeum vulgare subsp. vulgare OX=112509 PE=3 SV=1	0.932927	0.85702	0.697604	0.918635	-0.209307
A0A8I6XK58	>tr|A0A8I6XK58|A0A8I6XK58_HORVV Thioredoxin domain-containing protein OS=Hordeum vulgare subsp. vulgare OX=112509 PE=4 SV=1	1.30222	0.776237	0.145025	0.596088	-1.27599
A0A8I6XK73	>tr|A0A8I6XK73|A0A8I6XK73_HORVV RNA helicase OS=Hordeum vulgare subsp. vulgare OX=112509 PE=4 SV=1	0.55475	0.391227	0.33419	0.70523	-0.861309
A0A8I6XK93	>tr|A0A8I6XK93|A0A8I6XK93_HORVV Eukaryotic translation initiation factor 5A OS=Hordeum vulgare subsp. vulgare OX=112509 PE=3 SV=1	3.83593	3.02201	0.332601	0.787817	-0.588186
A0A8I6XKB9	>tr|A0A8I6XKB9|A0A8I6XKB9_HORVV non-specific serine/threonine protein kinase OS=Hordeum vulgare subsp. vulgare OX=112509 PE=4 SV=1	0.62241	0.55971	0.324961	0.899262	-0.261874
A0A8I6XKD9	>tr|A0A8I6XKD9|A0A8I6XKD9_HORVV 4-coumarate--CoA ligase OS=Hordeum vulgare subsp. vulgare OX=112509 PE=3 SV=1	1.48095	1.40177	0.873169	0.946535	-0.135518
A0A8I6XKE4	>tr|A0A8I6XKE4|A0A8I6XKE4_HORVV Ferredoxin-thioredoxin reductase catalytic chain, chloroplastic OS=Hordeum vulgare subsp. vulgare OX=112509 PE=3 SV=1	0.782339	0.638666	0.163018	0.816355	-0.500428
A0A8I6XKF9	>tr|A0A8I6XKF9|A0A8I6XKF9_HORVV Malic enzyme OS=Hordeum vulgare subsp. vulgare OX=112509 PE=3 SV=1	0.602903	0.355678	0.241335	0.589942	-1.30155
A0A8I6XKG6	>tr|A0A8I6XKG6|A0A8I6XKG6_HORVV Protein FLX-like 3 OS=Hordeum vulgare subsp. vulgare OX=112509 PE=3 SV=1	2.13073	1.89034	0.551085	0.887181	-0.295232
A0A8I6XKI1	>tr|A0A8I6XKI1|A0A8I6XKI1_HORVV beta-glucosidase OS=Hordeum vulgare subsp. vulgare OX=112509 PE=4 SV=1	0.932613	1.2959	0.202618	1.38954	0.811341
A0A8I6XKI3	>tr|A0A8I6XKI3|A0A8I6XKI3_HORVV SHSP domain-containing protein OS=Hordeum vulgare subsp. vulgare OX=112509 PE=3 SV=1	0.745421	0.537518	0.170029	0.721093	-0.806449
A0A8I6XKK0	>tr|A0A8I6XKK0|A0A8I6XKK0_HORVV Bet v I/Major latex protein domain-containing protein OS=Hordeum vulgare subsp. vulgare OX=112509 PE=3 SV=1	0.95425	1.11847	0.698609	1.1721	0.391633
A0A8I6XKL1	>tr|A0A8I6XKL1|A0A8I6XKL1_HORVV MAR-binding filament-like protein 1 OS=Hordeum vulgare subsp. vulgare OX=112509 PE=4 SV=1	0.708825	0.576947	0.592084	0.813948	-0.507709
A0A8I6XKP9	>tr|A0A8I6XKP9|A0A8I6XKP9_HORVV HTH cro/C1-type domain-containing protein OS=Hordeum vulgare subsp. vulgare OX=112509 PE=4 SV=1	7.21101	5.50432	0.261058	0.763322	-0.666089
A0A8I6XKQ4	>tr|A0A8I6XKQ4|A0A8I6XKQ4_HORVV CHCH domain-containing protein OS=Hordeum vulgare subsp. vulgare OX=112509 PE=3 SV=1	1.76073	1.39545	0.139149	0.79254	-0.573445
A0A8I6XKT3	>tr|A0A8I6XKT3|A0A8I6XKT3_HORVV Water stress and hypersensitive response domain-containing protein OS=Hordeum vulgare subsp. vulgare OX=112509 PE=3 SV=1	6.08938	5.94877	0.86569	0.976908	-0.0576199
A0A8I6XKT8	>tr|A0A8I6XKT8|A0A8I6XKT8_HORVV Protein kinase domain-containing protein OS=Hordeum vulgare subsp. vulgare OX=112509 PE=4 SV=1	0.777916	0.680494	0.643211	0.874765	-0.329991
A0A8I6XKV8	>tr|A0A8I6XKV8|A0A8I6XKV8_HORVV Aconitate hydratase OS=Hordeum vulgare subsp. vulgare OX=112509 PE=3 SV=1	2.15991	2.0196	0.632059	0.935043	-0.165644
A0A8I6XKX5	>tr|A0A8I6XKX5|A0A8I6XKX5_HORVV DUF3700 domain-containing protein OS=Hordeum vulgare subsp. vulgare OX=112509 PE=4 SV=1	9.81537	8.54505	0.553902	0.870579	-0.341822
A0A8I6XL02	>tr|A0A8I6XL02|A0A8I6XL02_HORVV Uncharacterized protein OS=Hordeum vulgare subsp. vulgare OX=112509 PE=3 SV=1	0.562193	0.863898	0.386557	1.53666	1.05955
A0A8I6XL50	>tr|A0A8I6XL50|A0A8I6XL50_HORVV Response regulatory domain-containing protein OS=Hordeum vulgare subsp. vulgare OX=112509 PE=4 SV=1	0.444017	0.71744	0.218232	1.61579	1.1834
A0A8I6XL67	>tr|A0A8I6XL67|A0A8I6XL67_HORVV Polygalacturonase OS=Hordeum vulgare subsp. vulgare OX=112509 PE=3 SV=1	1.82346	1.63305	0.696263	0.89558	-0.271994
A0A8I6XLA8	>tr|A0A8I6XLA8|A0A8I6XLA8_HORVV Uncharacterized protein OS=Hordeum vulgare subsp. vulgare OX=112509 PE=4 SV=1	0.444649	0.352451	0.532454	0.79265	-0.573104
A0A8I6XLD0	>tr|A0A8I6XLD0|A0A8I6XLD0_HORVV Histone H2A OS=Hordeum vulgare subsp. vulgare OX=112509 PE=3 SV=1	1.27158	2.06872	0.180092	1.62689	1.20028
A0A8I6XLF0	>tr|A0A8I6XLF0|A0A8I6XLF0_HORVV Seed maturation protein PM41 OS=Hordeum vulgare subsp. vulgare OX=112509 PE=4 SV=1	1.25498	1.04367	0.126801	0.831624	-0.454723
A0A8I6XLH6	>tr|A0A8I6XLH6|A0A8I6XLH6_HORVV Bis(5'-adenosyl)-triphosphatase OS=Hordeum vulgare subsp. vulgare OX=112509 PE=4 SV=1	0.560864	0.395874	0.459219	0.70583	-0.859214
A0A8I6XLI3	>tr|A0A8I6XLI3|A0A8I6XLI3_HORVV Pyruvate kinase OS=Hordeum vulgare subsp. vulgare OX=112509 PE=3 SV=1	0.802376	0.995134	0.0596275	1.24023	0.530996
A0A8I6XLJ4	>tr|A0A8I6XLJ4|A0A8I6XLJ4_HORVV Cullin family profile domain-containing protein OS=Hordeum vulgare subsp. vulgare OX=112509 PE=3 SV=1	0.779034	0.778544	0.994635	0.999371	-0.00155188
A0A8I6XLK3	>tr|A0A8I6XLK3|A0A8I6XLK3_HORVV FAS1 domain-containing protein OS=Hordeum vulgare subsp. vulgare OX=112509 PE=3 SV=1	1.01345	1.16885	0.788831	1.15334	0.351844
A0A8I6XLP2	>tr|A0A8I6XLP2|A0A8I6XLP2_HORVV Barwin domain-containing protein OS=Hordeum vulgare subsp. vulgare OX=112509 PE=4 SV=1	1.5523	1.34569	0.763011	0.866904	-0.352256
A0A8I6XLR3	>tr|A0A8I6XLR3|A0A8I6XLR3_HORVV Protein CASP OS=Hordeum vulgare subsp. vulgare OX=112509 PE=3 SV=1	2.62165	1.91329	0.148437	0.729802	-0.776843
A0A8I6XLS0	>tr|A0A8I6XLS0|A0A8I6XLS0_HORVV Enoyl reductase (ER) domain-containing protein OS=Hordeum vulgare subsp. vulgare OX=112509 PE=4 SV=1	0.31726	0.843794	0.036675	2.65963	2.41251
A0A8I6XLS1	>tr|A0A8I6XLS1|A0A8I6XLS1_HORVV phosphoglucomutase (alpha-D-glucose-1,6-bisphosphate-dependent) OS=Hordeum vulgare subsp. vulgare OX=112509 PE=3 SV=1	9.79191	9.77754	0.989341	0.998533	-0.00362141
A0A8I6XLT2	>tr|A0A8I6XLT2|A0A8I6XLT2_HORVV Phytocyanin domain-containing protein OS=Hordeum vulgare subsp. vulgare OX=112509 PE=4 SV=1	2.46987	1.83129	0.403165	0.74145	-0.737788
A0A8I6XLT8	>tr|A0A8I6XLT8|A0A8I6XLT8_HORVV ATP-dependent 6-phosphofructokinase OS=Hordeum vulgare subsp. vulgare OX=112509 GN=PFK PE=3 SV=1	1.00161	1.51532	0.207617	1.51288	1.02109	PFK
A0A8I6XLX2	>tr|A0A8I6XLX2|A0A8I6XLX2_HORVV Plant intracellular Ras-group-related LRR protein 3 OS=Hordeum vulgare subsp. vulgare OX=112509 PE=3 SV=1	1.27668	1.01507	0.344771	0.795085	-0.565539
A0A8I6XLY1	>tr|A0A8I6XLY1|A0A8I6XLY1_HORVV DUF569 domain-containing protein OS=Hordeum vulgare subsp. vulgare OX=112509 PE=4 SV=1	0.690774	0.822182	0.315952	1.19023	0.429506
A0A8I6XLY5	>tr|A0A8I6XLY5|A0A8I6XLY5_HORVV MPN domain-containing protein OS=Hordeum vulgare subsp. vulgare OX=112509 PE=3 SV=1	0.965707	0.89064	0.265584	0.922267	-0.199575
A0A8I6XM82	>tr|A0A8I6XM82|A0A8I6XM82_HORVV GBF-interacting protein 1 N-terminal domain-containing protein OS=Hordeum vulgare subsp. vulgare OX=112509 PE=4 SV=1	0.547169	0.51374	0.748074	0.938905	-0.155478
A0A8I6XM85	>tr|A0A8I6XM85|A0A8I6XM85_HORVV RRM domain-containing protein OS=Hordeum vulgare subsp. vulgare OX=112509 PE=4 SV=1	0.6252	0.878495	0.449785	1.40514	0.838886
A0A8I6XMB5	>tr|A0A8I6XMB5|A0A8I6XMB5_HORVV Myosin-17-like OS=Hordeum vulgare subsp. vulgare OX=112509 PE=3 SV=1	0.753755	0.838128	0.257106	1.11194	0.261683
A0A8I6XMD3	>tr|A0A8I6XMD3|A0A8I6XMD3_HORVV Serine/threonine-protein phosphatase 6 regulatory subunit OS=Hordeum vulgare subsp. vulgare OX=112509 PE=3 SV=1	0.686783	0.23572	0.0712438	0.343223	-2.6374
A0A8I6XMG1	>tr|A0A8I6XMG1|A0A8I6XMG1_HORVV Peroxidase OS=Hordeum vulgare subsp. vulgare OX=112509 PE=3 SV=1	0.472523	0.490644	0.921355	1.03835	0.0928089
A0A8I6XMI1	>tr|A0A8I6XMI1|A0A8I6XMI1_HORVV Protein FAM136A OS=Hordeum vulgare subsp. vulgare OX=112509 PE=3 SV=1	3.36968	2.46843	0.0467016	0.73254	-0.767606
A0A8I6XMJ1	>tr|A0A8I6XMJ1|A0A8I6XMJ1_HORVV Caleosin OS=Hordeum vulgare subsp. vulgare OX=112509 PE=3 SV=1	4.48036	3.38276	0.239211	0.75502	-0.69306
A0A8I6XML6	>tr|A0A8I6XML6|A0A8I6XML6_HORVV Superoxide dismutase [Cu-Zn] OS=Hordeum vulgare subsp. vulgare OX=112509 PE=3 SV=1	0.704934	0.801829	0.606884	1.13745	0.31764
A0A8I6XMQ4	>tr|A0A8I6XMQ4|A0A8I6XMQ4_HORVV Tr-type G domain-containing protein OS=Hordeum vulgare subsp. vulgare OX=112509 PE=4 SV=1	0.778418	0.636378	0.070595	0.817527	-0.49689
A0A8I6XMU9	>tr|A0A8I6XMU9|A0A8I6XMU9_HORVV Agmatine deiminase OS=Hordeum vulgare subsp. vulgare OX=112509 PE=3 SV=1	1.10564	1.06288	0.818143	0.961332	-0.0972601
A0A8I6XMW2	>tr|A0A8I6XMW2|A0A8I6XMW2_HORVV Proteasome subunit beta OS=Hordeum vulgare subsp. vulgare OX=112509 PE=3 SV=1	2.02767	1.7053	0.119986	0.841018	-0.427022
A0A8I6XMW4	>tr|A0A8I6XMW4|A0A8I6XMW4_HORVV Carbamoyl-phosphate synthase (glutamine-hydrolyzing) OS=Hordeum vulgare subsp. vulgare OX=112509 PE=3 SV=1	1.61695	1.79678	0.660153	1.11121	0.260078
A0A8I6XMW6	>tr|A0A8I6XMW6|A0A8I6XMW6_HORVV ACT domain-containing protein ACR OS=Hordeum vulgare subsp. vulgare OX=112509 PE=4 SV=1	2.13283	1.77798	0.040473	0.833624	-0.4488
A0A8I6XMZ6	>tr|A0A8I6XMZ6|A0A8I6XMZ6_HORVV PP2A regulatory subunit TAP46 OS=Hordeum vulgare subsp. vulgare OX=112509 PE=4 SV=1	1.56414	2.03054	0.62219	1.29818	0.643622
A0A8I6XN02	>tr|A0A8I6XN02|A0A8I6XN02_HORVV 5-methyltetrahydropteroyltriglutamate--homocysteine S-methyltransferase OS=Hordeum vulgare subsp. vulgare OX=112509 PE=3 SV=1	2.99215	2.69363	0.500412	0.900231	-0.259217
A0A8I6XN47	>tr|A0A8I6XN47|A0A8I6XN47_HORVV Thioredoxin domain-containing protein OS=Hordeum vulgare subsp. vulgare OX=112509 PE=4 SV=1	1.22805	1.28321	0.870133	1.04492	0.108359
A0A8I6XN50	>tr|A0A8I6XN50|A0A8I6XN50_HORVV Tubulin-specific chaperone A OS=Hordeum vulgare subsp. vulgare OX=112509 PE=3 SV=1	7.41999	4.14968	0.00390253	0.559257	-1.43328
A0A8I6XN54	>tr|A0A8I6XN54|A0A8I6XN54_HORVV COP9 signalosome complex subunit 4 OS=Hordeum vulgare subsp. vulgare OX=112509 PE=3 SV=1	1.53429	1.95415	0.440739	1.27365	0.596573
A0A8I6XN61	>tr|A0A8I6XN61|A0A8I6XN61_HORVV Dephospho-CoA kinase OS=Hordeum vulgare subsp. vulgare OX=112509 PE=3 SV=1	0.595948	0.40452	0.33107	0.678784	-0.955576
A0A8I6XNB1	>tr|A0A8I6XNB1|A0A8I6XNB1_HORVV NADH dehydrogenase [ubiquinone] 1 alpha subcomplex subunit 13 OS=Hordeum vulgare subsp. vulgare OX=112509 PE=3 SV=1	3.3693	3.90862	0.667735	1.16007	0.366195
A0A8I6XND6	>tr|A0A8I6XND6|A0A8I6XND6_HORVV glutamate synthase (NADH) OS=Hordeum vulgare subsp. vulgare OX=112509 PE=3 SV=1	0.708766	0.859355	0.443818	1.21247	0.475151
A0A8I6XND7	>tr|A0A8I6XND7|A0A8I6XND7_HORVV Copper transport protein OS=Hordeum vulgare subsp. vulgare OX=112509 PE=3 SV=1	0.493658	0.421204	0.543684	0.853229	-0.391469
A0A8I6XNH7	>tr|A0A8I6XNH7|A0A8I6XNH7_HORVV Translocon Sec61/SecY plug domain-containing protein OS=Hordeum vulgare subsp. vulgare OX=112509 PE=3 SV=1	0.363935	0.430168	0.610742	1.18199	0.412371
A0A8I6XNH9	>tr|A0A8I6XNH9|A0A8I6XNH9_HORVV Endoplasmic reticulum transmembrane protein OS=Hordeum vulgare subsp. vulgare OX=112509 PE=3 SV=1	0.935563	1.31364	0.180076	1.40412	0.837082
A0A8I6XNJ0	>tr|A0A8I6XNJ0|A0A8I6XNJ0_HORVV MDR-like ABC transporter OS=Hordeum vulgare subsp. vulgare OX=112509 PE=4 SV=1	0.614448	0.557465	0.468912	0.907262	-0.240031
A0A8I6XNK1	>tr|A0A8I6XNK1|A0A8I6XNK1_HORVV glutathione transferase OS=Hordeum vulgare subsp. vulgare OX=112509 PE=3 SV=1	3.3215	5.33654	0.47994	1.60667	1.16943
A0A8I6XNK7	>tr|A0A8I6XNK7|A0A8I6XNK7_HORVV Long-chain-fatty-acid--CoA ligase OS=Hordeum vulgare subsp. vulgare OX=112509 PE=3 SV=1	0.960241	0.996402	0.790775	1.03766	0.0911681
A0A8I6XNM1	>tr|A0A8I6XNM1|A0A8I6XNM1_HORVV non-reducing end alpha-L-arabinofuranosidase OS=Hordeum vulgare subsp. vulgare OX=112509 PE=3 SV=1	0.707449	0.673138	0.473416	0.9515	-0.122613
A0A8I6XNN7	>tr|A0A8I6XNN7|A0A8I6XNN7_HORVV STI1/HOP DP domain-containing protein OS=Hordeum vulgare subsp. vulgare OX=112509 PE=4 SV=1	2.24785	2.34077	0.901269	1.04134	0.0999048
A0A8I6XNQ6	>tr|A0A8I6XNQ6|A0A8I6XNQ6_HORVV Cyclase OS=Hordeum vulgare subsp. vulgare OX=112509 PE=3 SV=1	0.711945	0.609671	0.0364265	0.856345	-0.382478
A0A8I6XNR1	>tr|A0A8I6XNR1|A0A8I6XNR1_HORVV Uncharacterized protein OS=Hordeum vulgare subsp. vulgare OX=112509 PE=4 SV=1	0.549375	0.296253	0.220132	0.539254	-1.52311
A0A8I6XNS1	>tr|A0A8I6XNS1|A0A8I6XNS1_HORVV Alanine--tRNA ligase OS=Hordeum vulgare subsp. vulgare OX=112509 PE=3 SV=1	1.77297	1.93767	0.707701	1.0929	0.219084
A0A8I6XNV5	>tr|A0A8I6XNV5|A0A8I6XNV5_HORVV NAD(P)-binding domain-containing protein OS=Hordeum vulgare subsp. vulgare OX=112509 PE=4 SV=1	3.22611	2.78932	0.446692	0.864609	-0.358794
A0A8I6XNX9	>tr|A0A8I6XNX9|A0A8I6XNX9_HORVV Acyl carrier protein OS=Hordeum vulgare subsp. vulgare OX=112509 PE=3 SV=1	0.572862	0.529506	0.649295	0.924318	-0.194096
A0A8I6XP18	>tr|A0A8I6XP18|A0A8I6XP18_HORVV GDP-Man:Man(3)GlcNAc(2)-PP-Dol alpha-1,2-mannosyltransferase OS=Hordeum vulgare subsp. vulgare OX=112509 PE=3 SV=1	0.581732	0.601291	0.813322	1.03362	0.0815584
A0A8I6XP22	>tr|A0A8I6XP22|A0A8I6XP22_HORVV formate--tetrahydrofolate ligase OS=Hordeum vulgare subsp. vulgare OX=112509 PE=3 SV=1	5.51847	4.46572	0.198843	0.809231	-0.522045
A0A8I6XP33	>tr|A0A8I6XP33|A0A8I6XP33_HORVV ASCH domain-containing protein OS=Hordeum vulgare subsp. vulgare OX=112509 PE=4 SV=1	0.522793	0.362683	0.243612	0.693742	-0.901815
A0A8I6XP65	>tr|A0A8I6XP65|A0A8I6XP65_HORVV Alpha-amylase OS=Hordeum vulgare subsp. vulgare OX=112509 PE=3 SV=1	0.588415	1.14138	0.0357892	1.93975	1.63407
A0A8I6XP71	>tr|A0A8I6XP71|A0A8I6XP71_HORVV 2,4-dienoyl-CoA reductase [(3E)-enoyl-CoA-producing] OS=Hordeum vulgare subsp. vulgare OX=112509 PE=4 SV=1	5.88078	5.99343	0.918049	1.01916	0.0467969
A0A8I6XPA9	>tr|A0A8I6XPA9|A0A8I6XPA9_HORVV Sugar phosphate transporter domain-containing protein OS=Hordeum vulgare subsp. vulgare OX=112509 PE=4 SV=1	0.426195	0.744667	0.170023	1.74725	1.3763
A0A8I6XPB3	>tr|A0A8I6XPB3|A0A8I6XPB3_HORVV diaminopimelate epimerase OS=Hordeum vulgare subsp. vulgare OX=112509 PE=3 SV=1	0.971962	1.92936	0.0595792	1.98502	1.69096
A0A8I6XPB5	>tr|A0A8I6XPB5|A0A8I6XPB5_HORVV UDP-arabinopyranose mutase OS=Hordeum vulgare subsp. vulgare OX=112509 PE=3 SV=1	1.51591	1.29353	0.718876	0.853304	-0.391253
A0A8I6XPC6	>tr|A0A8I6XPC6|A0A8I6XPC6_HORVV Splicing factor U2af large subunit OS=Hordeum vulgare subsp. vulgare OX=112509 PE=3 SV=1	0.817099	0.672553	0.423332	0.823099	-0.480138
A0A8I6XPG4	>tr|A0A8I6XPG4|A0A8I6XPG4_HORVV Polygalacturonase OS=Hordeum vulgare subsp. vulgare OX=112509 PE=3 SV=1	0.731227	0.60834	0.141034	0.831945	-0.453773
A0A8I6XPK4	>tr|A0A8I6XPK4|A0A8I6XPK4_HORVV tryptophan--tRNA ligase OS=Hordeum vulgare subsp. vulgare OX=112509 PE=3 SV=1	0.712329	0.840861	0.748045	1.18044	0.409125
A0A8I6XPL0	>tr|A0A8I6XPL0|A0A8I6XPL0_HORVV WPP domain-interacting protein 2 OS=Hordeum vulgare subsp. vulgare OX=112509 PE=4 SV=1	0.604495	0.399754	0.0709623	0.661302	-1.01993
A0A8I6XPZ5	>tr|A0A8I6XPZ5|A0A8I6XPZ5_HORVV Glycine cleavage system P protein OS=Hordeum vulgare subsp. vulgare OX=112509 PE=3 SV=1	0.773795	0.69447	0.423444	0.897486	-0.26675
A0A8I6XQ26	>tr|A0A8I6XQ26|A0A8I6XQ26_HORVV hydroxyacylglutathione hydrolase OS=Hordeum vulgare subsp. vulgare OX=112509 PE=3 SV=1	1.18166	1.64391	0.433446	1.39119	0.814266
A0A8I6XQ39	>tr|A0A8I6XQ39|A0A8I6XQ39_HORVV Bifunctional inhibitor/plant lipid transfer protein/seed storage helical domain-containing protein OS=Hordeum vulgare subsp. vulgare OX=112509 PE=3 SV=1	21.9823	20.5762	0.677135	0.936033	-0.163034
A0A8I6XQ51	>tr|A0A8I6XQ51|A0A8I6XQ51_HORVV RRM domain-containing protein OS=Hordeum vulgare subsp. vulgare OX=112509 PE=4 SV=1	0.76913	0.733726	0.880242	0.953969	-0.116222
A0A8I6XQ97	>tr|A0A8I6XQ97|A0A8I6XQ97_HORVV DNA-damage-repair/toleration protein DRT111, chloroplastic OS=Hordeum vulgare subsp. vulgare OX=112509 PE=4 SV=1	0.385027	0.401013	0.936222	1.04152	0.100326
A0A8I6XQC4	>tr|A0A8I6XQC4|A0A8I6XQC4_HORVV Anthranilate phosphoribosyltransferase, chloroplastic OS=Hordeum vulgare subsp. vulgare OX=112509 PE=3 SV=1	0.638556	0.639572	0.993207	1.00159	0.00392411
A0A8I6XQD1	>tr|A0A8I6XQD1|A0A8I6XQD1_HORVV RNA helicase OS=Hordeum vulgare subsp. vulgare OX=112509 PE=4 SV=1	0.922313	1.10626	0.194784	1.19944	0.448506
A0A8I6XQE3	>tr|A0A8I6XQE3|A0A8I6XQE3_HORVV 2Fe-2S ferredoxin-type domain-containing protein OS=Hordeum vulgare subsp. vulgare OX=112509 PE=4 SV=1	0.454522	0.421906	0.478424	0.928241	-0.18365
A0A8I6XQF4	>tr|A0A8I6XQF4|A0A8I6XQF4_HORVV Beta-fructofuranosidase OS=Hordeum vulgare subsp. vulgare OX=112509 PE=3 SV=1	1.89717	1.87772	0.949515	0.989752	-0.0254062
A0A8I6XQJ3	>tr|A0A8I6XQJ3|A0A8I6XQJ3_HORVV FAD-binding PCMH-type domain-containing protein OS=Hordeum vulgare subsp. vulgare OX=112509 PE=4 SV=1	0.655976	0.456154	0.345959	0.695383	-0.895989
A0A8I6XQP5	>tr|A0A8I6XQP5|A0A8I6XQP5_HORVV Alpha-N-acetylglucosaminidase OS=Hordeum vulgare subsp. vulgare OX=112509 PE=4 SV=1	0.68387	0.821235	0.503449	1.20086	0.451436
A0A8I6XQQ9	>tr|A0A8I6XQQ9|A0A8I6XQQ9_HORVV Cell division cycle 5-like protein OS=Hordeum vulgare subsp. vulgare OX=112509 PE=3 SV=1	3.25001	2.49276	0.101269	0.767	-0.654231
A0A8I6XQR4	>tr|A0A8I6XQR4|A0A8I6XQR4_HORVV PCI domain-containing protein OS=Hordeum vulgare subsp. vulgare OX=112509 PE=3 SV=1	1.47516	1.16051	0.139108	0.786704	-0.591675
A0A8I6XQR9	>tr|A0A8I6XQR9|A0A8I6XQR9_HORVV Plasma membrane ATPase OS=Hordeum vulgare subsp. vulgare OX=112509 PE=3 SV=1	2.13597	3.57907	0.023123	1.67562	1.27306
A0A8I6XQS7	>tr|A0A8I6XQS7|A0A8I6XQS7_HORVV RNA helicase OS=Hordeum vulgare subsp. vulgare OX=112509 PE=3 SV=1	0.592591	0.548842	0.530866	0.926173	-0.18915
A0A8I6XQT6	>tr|A0A8I6XQT6|A0A8I6XQT6_HORVV Non-specific lipid-transfer protein OS=Hordeum vulgare subsp. vulgare OX=112509 PE=3 SV=1	0.734837	0.655562	0.654431	0.892118	-0.281544
A0A8I6XQU3	>tr|A0A8I6XQU3|A0A8I6XQU3_HORVV Histone H2B OS=Hordeum vulgare subsp. vulgare OX=112509 PE=3 SV=1	0.608882	0.490977	0.388337	0.806359	-0.530815
A0A8I6XQV5	>tr|A0A8I6XQV5|A0A8I6XQV5_HORVV RHOMBOID-like protein OS=Hordeum vulgare subsp. vulgare OX=112509 PE=3 SV=1	0.628175	0.986961	0.154357	1.57116	1.1143
A0A8I6XQW2	>tr|A0A8I6XQW2|A0A8I6XQW2_HORVV UDP-glucuronate decarboxylase OS=Hordeum vulgare subsp. vulgare OX=112509 PE=3 SV=1	0.791564	0.4566	0.0983361	0.576832	-1.35697
A0A8I6XQX4	>tr|A0A8I6XQX4|A0A8I6XQX4_HORVV Methenyltetrahydrofolate cyclohydrolase OS=Hordeum vulgare subsp. vulgare OX=112509 PE=3 SV=1	0.76736	1.5574	0.00479577	2.02956	1.7457
A0A8I6XQZ2	>tr|A0A8I6XQZ2|A0A8I6XQZ2_HORVV L-ascorbate peroxidase OS=Hordeum vulgare subsp. vulgare OX=112509 PE=3 SV=1	10.5624	10.1994	0.795993	0.96563	-0.0862577
A0A8I6XQZ6	>tr|A0A8I6XQZ6|A0A8I6XQZ6_HORVV glutathione transferase OS=Hordeum vulgare subsp. vulgare OX=112509 PE=3 SV=1	1.94187	1.60613	0.261713	0.827106	-0.468159
A0A8I6XR17	>tr|A0A8I6XR17|A0A8I6XR17_HORVV GST N-terminal domain-containing protein OS=Hordeum vulgare subsp. vulgare OX=112509 PE=4 SV=1	3.27312	2.62119	0.0468155	0.800822	-0.547806
A0A8I6XR57	>tr|A0A8I6XR57|A0A8I6XR57_HORVV Myb/SANT-like DNA-binding domain-containing protein OS=Hordeum vulgare subsp. vulgare OX=112509 PE=4 SV=1	2.78574	2.05015	0.110533	0.735944	-0.75617
A0A8I6XR62	>tr|A0A8I6XR62|A0A8I6XR62_HORVV PRA1 family protein OS=Hordeum vulgare subsp. vulgare OX=112509 PE=3 SV=1	0.534454	0.473415	0.741924	0.885793	-0.299093
A0A8I6XR99	>tr|A0A8I6XR99|A0A8I6XR99_HORVV ENTH domain-containing protein OS=Hordeum vulgare subsp. vulgare OX=112509 PE=4 SV=1	0.617363	0.48221	0.384802	0.781081	-0.609367
A0A8I6XRB0	>tr|A0A8I6XRB0|A0A8I6XRB0_HORVV Vps53 N-terminal domain-containing protein OS=Hordeum vulgare subsp. vulgare OX=112509 PE=3 SV=1	0.823311	0.829765	0.92438	1.00784	0.0192575
A0A8I6XRC8	>tr|A0A8I6XRC8|A0A8I6XRC8_HORVV Uncharacterized protein OS=Hordeum vulgare subsp. vulgare OX=112509 PE=4 SV=1	1.4068	1.26018	0.543235	0.895775	-0.271455
A0A8I6XRD3	>tr|A0A8I6XRD3|A0A8I6XRD3_HORVV Uncharacterized protein OS=Hordeum vulgare subsp. vulgare OX=112509 PE=4 SV=1	7.77312	6.68871	0.339917	0.860492	-0.370563
A0A8I6XRG5	>tr|A0A8I6XRG5|A0A8I6XRG5_HORVV MaoC-like domain-containing protein OS=Hordeum vulgare subsp. vulgare OX=112509 PE=4 SV=1	0.703864	0.581734	0.364794	0.826486	-0.47001
A0A8I6XRG6	>tr|A0A8I6XRG6|A0A8I6XRG6_HORVV Uncharacterized protein OS=Hordeum vulgare subsp. vulgare OX=112509 PE=4 SV=1	11.3421	11.6888	0.776325	1.03057	0.0742742
A0A8I6XRH2	>tr|A0A8I6XRH2|A0A8I6XRH2_HORVV UBC core domain-containing protein OS=Hordeum vulgare subsp. vulgare OX=112509 PE=4 SV=1	2.49163	2.88373	0.160251	1.15736	0.360438
A0A8I6XRI5	>tr|A0A8I6XRI5|A0A8I6XRI5_HORVV Phospholipase/carboxylesterase/thioesterase domain-containing protein OS=Hordeum vulgare subsp. vulgare OX=112509 PE=4 SV=1	0.984737	1.41819	0.357986	1.44017	0.899613
A0A8I6XRI6	>tr|A0A8I6XRI6|A0A8I6XRI6_HORVV Matrin-type domain-containing protein OS=Hordeum vulgare subsp. vulgare OX=112509 PE=3 SV=1	0.607274	0.785598	0.572781	1.29365	0.634987
A0A8I6XRL6	>tr|A0A8I6XRL6|A0A8I6XRL6_HORVV ERAD-associated E3 ubiquitin-protein ligase component HRD3A OS=Hordeum vulgare subsp. vulgare OX=112509 PE=4 SV=1	0.597866	0.640498	0.284545	1.07131	0.169876
A0A8I6XRM7	>tr|A0A8I6XRM7|A0A8I6XRM7_HORVV Fe2OG dioxygenase domain-containing protein OS=Hordeum vulgare subsp. vulgare OX=112509 PE=3 SV=1	0.866774	2.36794	0.391495	2.7319	2.47863
A0A8I6XRP4	>tr|A0A8I6XRP4|A0A8I6XRP4_HORVV Prokaryotic-type class I peptide chain release factors domain-containing protein OS=Hordeum vulgare subsp. vulgare OX=112509 PE=3 SV=1	0.555534	0.434276	0.27263	0.781728	-0.607322
A0A8I6XRP8	>tr|A0A8I6XRP8|A0A8I6XRP8_HORVV Beta-fructofuranosidase OS=Hordeum vulgare subsp. vulgare OX=112509 PE=3 SV=1	0.830341	0.813265	0.956958	0.979435	-0.0512483
A0A8I6XRQ1	>tr|A0A8I6XRQ1|A0A8I6XRQ1_HORVV Uncharacterized protein OS=Hordeum vulgare subsp. vulgare OX=112509 PE=4 SV=1	2.31767	2.19116	0.856514	0.945416	-0.138435
A0A8I6XRS7	>tr|A0A8I6XRS7|A0A8I6XRS7_HORVV SHSP domain-containing protein OS=Hordeum vulgare subsp. vulgare OX=112509 PE=3 SV=1	13.4322	8.96318	0.350407	0.667291	-0.997693
A0A8I6XRU7	>tr|A0A8I6XRU7|A0A8I6XRU7_HORVV O-methyltransferase ZRP4 OS=Hordeum vulgare subsp. vulgare OX=112509 PE=4 SV=1	0.549279	0.36159	0.152577	0.6583	-1.03115
A0A8I6XRV2	>tr|A0A8I6XRV2|A0A8I6XRV2_HORVV dolichyl-diphosphooligosaccharide--protein glycotransferase OS=Hordeum vulgare subsp. vulgare OX=112509 PE=3 SV=1	0.414041	0.428238	0.88283	1.03429	0.083146
A0A8I6XRV6	>tr|A0A8I6XRV6|A0A8I6XRV6_HORVV Ferredoxin OS=Hordeum vulgare subsp. vulgare OX=112509 PE=4 SV=1	3.46199	3.47412	0.979901	1.00351	0.0086317
A0A8I6XRZ8	>tr|A0A8I6XRZ8|A0A8I6XRZ8_HORVV CTLH domain-containing protein OS=Hordeum vulgare subsp. vulgare OX=112509 PE=4 SV=1	2.85356	2.2077	0.260932	0.773665	-0.632892
A0A8I6XS01	>tr|A0A8I6XS01|A0A8I6XS01_HORVV Uncharacterized protein OS=Hordeum vulgare subsp. vulgare OX=112509 PE=3 SV=1	0.828153	0.983399	0.640008	1.18746	0.423753
A0A8I6XS20	>tr|A0A8I6XS20|A0A8I6XS20_HORVV Uncharacterized protein OS=Hordeum vulgare subsp. vulgare OX=112509 PE=4 SV=1	0.502114	0.387867	0.460392	0.772468	-0.636713
A0A8I6XS45	>tr|A0A8I6XS45|A0A8I6XS45_HORVV Diaminopimelate decarboxylase OS=Hordeum vulgare subsp. vulgare OX=112509 PE=3 SV=1	0.491692	0.342446	0.361612	0.696465	-0.892155
A0A8I6XS48	>tr|A0A8I6XS48|A0A8I6XS48_HORVV Bifunctional inhibitor/plant lipid transfer protein/seed storage helical domain-containing protein OS=Hordeum vulgare subsp. vulgare OX=112509 PE=3 SV=1	1.65425	1.47175	0.724305	0.889673	-0.288314
A0A8I6XS59	>tr|A0A8I6XS59|A0A8I6XS59_HORVV BIG2 domain-containing protein OS=Hordeum vulgare subsp. vulgare OX=112509 PE=3 SV=1	0.848899	0.783856	0.746984	0.92338	-0.196601
A0A8I6XS65	>tr|A0A8I6XS65|A0A8I6XS65_HORVV Malate dehydrogenase OS=Hordeum vulgare subsp. vulgare OX=112509 PE=3 SV=1	2.72595	2.24027	0.466556	0.821829	-0.483944
A0A8I6XS75	>tr|A0A8I6XS75|A0A8I6XS75_HORVV Vacuolar protein 14 C-terminal Fig4-binding domain-containing protein OS=Hordeum vulgare subsp. vulgare OX=112509 PE=3 SV=1	0.494814	0.729941	0.223889	1.47518	0.958854
A0A8I6XS77	>tr|A0A8I6XS77|A0A8I6XS77_HORVV Deoxyuridine 5'-triphosphate nucleotidohydrolase OS=Hordeum vulgare subsp. vulgare OX=112509 PE=3 SV=1	2.23628	2.06336	0.8651	0.922677	-0.198479
A0A8I6XS93	>tr|A0A8I6XS93|A0A8I6XS93_HORVV Hcy-binding domain-containing protein OS=Hordeum vulgare subsp. vulgare OX=112509 PE=4 SV=1	0.751479	0.975706	0.506459	1.29838	0.643999
A0A8I6XSD2	>tr|A0A8I6XSD2|A0A8I6XSD2_HORVV Aspartyl aminopeptidase OS=Hordeum vulgare subsp. vulgare OX=112509 PE=3 SV=1	0.623619	0.921059	0.414455	1.47696	0.96182
A0A8I6XSD4	>tr|A0A8I6XSD4|A0A8I6XSD4_HORVV Uncharacterized protein OS=Hordeum vulgare subsp. vulgare OX=112509 PE=3 SV=1	0.650282	0.649266	0.991148	0.998438	-0.00385426
A0A8I6XSH3	>tr|A0A8I6XSH3|A0A8I6XSH3_HORVV BI1-like protein OS=Hordeum vulgare subsp. vulgare OX=112509 PE=3 SV=1	1.39636	0.823098	0.266611	0.589459	-1.30356
A0A8I6XSH5	>tr|A0A8I6XSH5|A0A8I6XSH5_HORVV CCT-beta OS=Hordeum vulgare subsp. vulgare OX=112509 PE=3 SV=1	0.506484	0.400587	0.491249	0.790918	-0.5785
A0A8I6XSQ9	>tr|A0A8I6XSQ9|A0A8I6XSQ9_HORVV Nucleoid-associated protein OS=Hordeum vulgare subsp. vulgare OX=112509 PE=4 SV=1	3.81871	3.02308	0.271014	0.79165	-0.576217
A0A8I6XSS4	>tr|A0A8I6XSS4|A0A8I6XSS4_HORVV serine--tRNA ligase OS=Hordeum vulgare subsp. vulgare OX=112509 PE=4 SV=1	1.82026	1.29913	0.595164	0.713708	-0.83184
A0A8I6XST8	>tr|A0A8I6XST8|A0A8I6XST8_HORVV aspartate-semialdehyde dehydrogenase OS=Hordeum vulgare subsp. vulgare OX=112509 PE=3 SV=1	5.16601	3.73759	0.355009	0.723496	-0.798245
A0A8I6XSU4	>tr|A0A8I6XSU4|A0A8I6XSU4_HORVV Subtilisin-like protease OS=Hordeum vulgare subsp. vulgare OX=112509 PE=3 SV=1	0.631835	0.54737	0.709025	0.866317	-0.353924
A0A8I6XSW6	>tr|A0A8I6XSW6|A0A8I6XSW6_HORVV Proteasome assembly chaperone 2 OS=Hordeum vulgare subsp. vulgare OX=112509 PE=3 SV=1	0.540675	0.581417	0.84577	1.07535	0.179177
A0A8I6XSX6	>tr|A0A8I6XSX6|A0A8I6XSX6_HORVV Dehydrin OS=Hordeum vulgare subsp. vulgare OX=112509 PE=3 SV=1	1.28472	1.46771	0.874649	1.14243	0.328407
A0A8I6XT03	>tr|A0A8I6XT03|A0A8I6XT03_HORVV 4-coumarate--CoA ligase OS=Hordeum vulgare subsp. vulgare OX=112509 PE=3 SV=1	0.801617	0.63829	0.413878	0.796253	-0.561918
A0A8I6XT22	>tr|A0A8I6XT22|A0A8I6XT22_HORVV CRAL-TRIO domain-containing protein OS=Hordeum vulgare subsp. vulgare OX=112509 PE=4 SV=1	0.563023	0.679358	0.434933	1.20663	0.463241
A0A8I6XT39	>tr|A0A8I6XT39|A0A8I6XT39_HORVV EF-hand domain-containing protein OS=Hordeum vulgare subsp. vulgare OX=112509 PE=4 SV=1	0.791165	1.14825	0.159503	1.45134	0.918666
A0A8I6XT53	>tr|A0A8I6XT53|A0A8I6XT53_HORVV Translation initiation factor eIF2B subunit delta OS=Hordeum vulgare subsp. vulgare OX=112509 PE=3 SV=1	0.682786	0.807387	0.773545	1.18249	0.413407
A0A8I6XTB9	>tr|A0A8I6XTB9|A0A8I6XTB9_HORVV Glutaredoxin-dependent peroxiredoxin OS=Hordeum vulgare subsp. vulgare OX=112509 PE=3 SV=1	2.54878	1.70903	0.14096	0.670529	-0.985754
A0A8I6XTE4	>tr|A0A8I6XTE4|A0A8I6XTE4_HORVV YTH domain-containing family protein OS=Hordeum vulgare subsp. vulgare OX=112509 PE=3 SV=1	1.46441	1.576	0.183125	1.0762	0.181108
A0A8I6XTF6	>tr|A0A8I6XTF6|A0A8I6XTF6_HORVV Histone H2A OS=Hordeum vulgare subsp. vulgare OX=112509 PE=3 SV=1	0.390071	0.468056	0.557058	1.19993	0.449507
A0A8I6XTG9	>tr|A0A8I6XTG9|A0A8I6XTG9_HORVV NEDD8-activating enzyme E1 catalytic subunit OS=Hordeum vulgare subsp. vulgare OX=112509 PE=3 SV=1	0.571026	0.602779	0.594688	1.05561	0.133465
A0A8I6XTH8	>tr|A0A8I6XTH8|A0A8I6XTH8_HORVV SAM-dependent MTase RsmB/NOP-type domain-containing protein OS=Hordeum vulgare subsp. vulgare OX=112509 PE=3 SV=1	0.639923	0.566848	0.176064	0.885807	-0.299054
A0A8I6XTH9	>tr|A0A8I6XTH9|A0A8I6XTH9_HORVV Mitochondrial import receptor subunit TOM40 OS=Hordeum vulgare subsp. vulgare OX=112509 PE=3 SV=1	0.752026	0.622365	0.365553	0.827584	-0.466736
A0A8I6XTJ0	>tr|A0A8I6XTJ0|A0A8I6XTJ0_HORVV Coatomer subunit beta' OS=Hordeum vulgare subsp. vulgare OX=112509 PE=3 SV=1	0.69262	1.02532	0.229078	1.48035	0.96748
A0A8I6XTL4	>tr|A0A8I6XTL4|A0A8I6XTL4_HORVV Bifunctional inhibitor/plant lipid transfer protein/seed storage helical domain-containing protein OS=Hordeum vulgare subsp. vulgare OX=112509 PE=4 SV=1	0.728469	0.476034	0.000960561	0.653472	-1.0493
A0A8I6XTR1	>tr|A0A8I6XTR1|A0A8I6XTR1_HORVV Vacuolar proton pump subunit B OS=Hordeum vulgare subsp. vulgare OX=112509 PE=3 SV=1	2.86112	2.61996	0.497175	0.915714	-0.217162
A0A8I6XTS4	>tr|A0A8I6XTS4|A0A8I6XTS4_HORVV Mannosyl-oligosaccharide glucosidase OS=Hordeum vulgare subsp. vulgare OX=112509 PE=3 SV=1	0.570365	0.833858	0.169328	1.46197	0.936667
A0A8I6XTT5	>tr|A0A8I6XTT5|A0A8I6XTT5_HORVV FAD-binding PCMH-type domain-containing protein OS=Hordeum vulgare subsp. vulgare OX=112509 PE=3 SV=1	0.661746	0.57907	0.661226	0.875063	-0.32915
A0A8I6XTU9	>tr|A0A8I6XTU9|A0A8I6XTU9_HORVV procollagen-proline 4-dioxygenase OS=Hordeum vulgare subsp. vulgare OX=112509 PE=3 SV=1	1.80619	1.63555	0.683594	0.905523	-0.244762
A0A8I6XTV2	>tr|A0A8I6XTV2|A0A8I6XTV2_HORVV NADH dehydrogenase [ubiquinone] 1 beta subcomplex subunit 11, mitochondrial OS=Hordeum vulgare subsp. vulgare OX=112509 PE=4 SV=1	1.76681	1.32358	0.321228	0.749136	-0.712352
A0A8I6XTX1	>tr|A0A8I6XTX1|A0A8I6XTX1_HORVV Uncharacterized protein OS=Hordeum vulgare subsp. vulgare OX=112509 PE=3 SV=1	1.91323	1.8172	0.652923	0.949808	-0.127004
A0A8I6XTX5	>tr|A0A8I6XTX5|A0A8I6XTX5_HORVV YGL010w-like protein OS=Hordeum vulgare subsp. vulgare OX=112509 PE=4 SV=1	1.60428	1.27133	0.0324146	0.792465	-0.573679
A0A8I6XU09	>tr|A0A8I6XU09|A0A8I6XU09_HORVV Tropinone reductase OS=Hordeum vulgare subsp. vulgare OX=112509 PE=4 SV=1	0.503833	0.86742	0.0917558	1.72164	1.33989
A0A8I6XU56	>tr|A0A8I6XU56|A0A8I6XU56_HORVV Vacuolar protein sorting-associated protein 29 OS=Hordeum vulgare subsp. vulgare OX=112509 PE=3 SV=1	0.768678	0.777065	0.918068	1.01091	0.0267648
A0A8I6XU83	>tr|A0A8I6XU83|A0A8I6XU83_HORVV Signal peptide peptidase OS=Hordeum vulgare subsp. vulgare OX=112509 PE=3 SV=1	0.725469	0.593621	0.238357	0.818258	-0.494684
A0A8I6XUD6	>tr|A0A8I6XUD6|A0A8I6XUD6_HORVV glutathione transferase OS=Hordeum vulgare subsp. vulgare OX=112509 PE=3 SV=1	3.36441	2.66243	0.266969	0.791351	-0.57715
A0A8I6XUF2	>tr|A0A8I6XUF2|A0A8I6XUF2_HORVV Pyruvate dehydrogenase E1 component subunit beta OS=Hordeum vulgare subsp. vulgare OX=112509 PE=4 SV=1	2.7747	2.68721	0.85437	0.968468	-0.0790202
A0A8I6XUG0	>tr|A0A8I6XUG0|A0A8I6XUG0_HORVV Elongation factor Tu OS=Hordeum vulgare subsp. vulgare OX=112509 PE=3 SV=1	0.486638	0.715591	0.357477	1.47048	0.950976
A0A8I6XUI9	>tr|A0A8I6XUI9|A0A8I6XUI9_HORVV Glucose-6-phosphate 1-dehydrogenase OS=Hordeum vulgare subsp. vulgare OX=112509 PE=3 SV=1	0.72793	0.654159	0.413162	0.898656	-0.263536
A0A8I6XUK6	>tr|A0A8I6XUK6|A0A8I6XUK6_HORVV NAD(P)-binding domain-containing protein OS=Hordeum vulgare subsp. vulgare OX=112509 PE=4 SV=1	4.57709	4.01771	0.0843588	0.877787	-0.321486
A0A8I6XUL2	>tr|A0A8I6XUL2|A0A8I6XUL2_HORVV Luminal-binding protein 5 OS=Hordeum vulgare subsp. vulgare OX=112509 PE=3 SV=1	1.82574	0.976093	0.445383	0.534627	-1.54436
A0A8I6XUL9	>tr|A0A8I6XUL9|A0A8I6XUL9_HORVV TOG domain-containing protein OS=Hordeum vulgare subsp. vulgare OX=112509 PE=4 SV=1	9.06911	5.2987	0.201606	0.584258	-1.32542
A0A8I6XUN7	>tr|A0A8I6XUN7|A0A8I6XUN7_HORVV Mitochondrial proton/calcium exchanger protein OS=Hordeum vulgare subsp. vulgare OX=112509 PE=3 SV=1	0.611156	0.966815	0.489244	1.58194	1.13118
A0A8I6XUP9	>tr|A0A8I6XUP9|A0A8I6XUP9_HORVV Uncharacterized protein OS=Hordeum vulgare subsp. vulgare OX=112509 PE=4 SV=1	2.37144	0.496482	0.100897	0.209359	-3.85657
A0A8I6XUQ8	>tr|A0A8I6XUQ8|A0A8I6XUQ8_HORVV 3-hydroxyacyl-CoA dehydrogenase OS=Hordeum vulgare subsp. vulgare OX=112509 PE=3 SV=1	0.528829	1.24818	0.099227	2.36027	2.118
A0A8I6XUR2	>tr|A0A8I6XUR2|A0A8I6XUR2_HORVV Serine/threonine-protein phosphatase OS=Hordeum vulgare subsp. vulgare OX=112509 PE=3 SV=1	1.16348	1.24967	0.617536	1.07408	0.176247
A0A8I6XUU4	>tr|A0A8I6XUU4|A0A8I6XUU4_HORVV beta-galactosidase OS=Hordeum vulgare subsp. vulgare OX=112509 PE=3 SV=1	0.392861	0.460811	0.855114	1.17296	0.393454
A0A8I6XUY9	>tr|A0A8I6XUY9|A0A8I6XUY9_HORVV TTF-type domain-containing protein OS=Hordeum vulgare subsp. vulgare OX=112509 PE=4 SV=1	0.639429	0.515506	0.384565	0.806198	-0.531307
A0A8I6XV07	>tr|A0A8I6XV07|A0A8I6XV07_HORVV ACB domain-containing protein OS=Hordeum vulgare subsp. vulgare OX=112509 PE=3 SV=1	1.14682	1.08978	0.842281	0.95027	-0.125804
A0A8I6XV23	>tr|A0A8I6XV23|A0A8I6XV23_HORVV Pantothenate kinase 2 OS=Hordeum vulgare subsp. vulgare OX=112509 PE=3 SV=1	0.933353	0.850571	0.244752	0.911307	-0.229059
A0A8I6XV24	>tr|A0A8I6XV24|A0A8I6XV24_HORVV Single-stranded DNA-binding protein, mitochondrial OS=Hordeum vulgare subsp. vulgare OX=112509 PE=4 SV=1	0.711353	0.687	0.789745	0.965764	-0.0859157
A0A8I6XV33	>tr|A0A8I6XV33|A0A8I6XV33_HORVV PCI domain-containing protein OS=Hordeum vulgare subsp. vulgare OX=112509 PE=3 SV=1	1.69902	2.03589	0.510952	1.19827	0.446111
A0A8I6XV49	>tr|A0A8I6XV49|A0A8I6XV49_HORVV Golgi to ER traffic protein 4 OS=Hordeum vulgare subsp. vulgare OX=112509 PE=3 SV=1	0.651845	0.630694	0.839577	0.967551	-0.0813559
A0A8I6XV54	>tr|A0A8I6XV54|A0A8I6XV54_HORVV HP domain-containing protein OS=Hordeum vulgare subsp. vulgare OX=112509 PE=3 SV=1	0.932685	0.809404	0.616319	0.867821	-0.349648
A0A8I6XV67	>tr|A0A8I6XV67|A0A8I6XV67_HORVV Transcription initiation factor TFIID subunit 15b OS=Hordeum vulgare subsp. vulgare OX=112509 PE=4 SV=1	0.443039	0.573276	0.392346	1.29396	0.635592
A0A8I6XV70	>tr|A0A8I6XV70|A0A8I6XV70_HORVV Uncharacterized protein OS=Hordeum vulgare subsp. vulgare OX=112509 PE=4 SV=1	0.5625	0.488139	0.54476	0.867803	-0.349697
A0A8I6XV73	>tr|A0A8I6XV73|A0A8I6XV73_HORVV Long-chain-fatty-acid--CoA ligase OS=Hordeum vulgare subsp. vulgare OX=112509 PE=3 SV=1	0.919539	1.23318	0.212702	1.34109	0.723814
A0A8I6XV79	>tr|A0A8I6XV79|A0A8I6XV79_HORVV Ubiquitin-fold modifier 1 OS=Hordeum vulgare subsp. vulgare OX=112509 PE=3 SV=1	2.77078	2.7343	0.965051	0.986834	-0.0326871
A0A8I6XVC1	>tr|A0A8I6XVC1|A0A8I6XVC1_HORVV DNA/RNA-binding protein Alba-like domain-containing protein OS=Hordeum vulgare subsp. vulgare OX=112509 PE=3 SV=1	1.20469	1.58431	0.560358	1.31512	0.675581
A0A8I6XVD6	>tr|A0A8I6XVD6|A0A8I6XVD6_HORVV Uncharacterized protein OS=Hordeum vulgare subsp. vulgare OX=112509 PE=3 SV=1	0.591145	0.599499	0.941276	1.01413	0.034607
A0A8I6XVE2	>tr|A0A8I6XVE2|A0A8I6XVE2_HORVV 2-phosphoglycerate kinase OS=Hordeum vulgare subsp. vulgare OX=112509 PE=4 SV=1	0.657279	0.329189	0.475196	0.500837	-1.70539
A0A8I6XVG7	>tr|A0A8I6XVG7|A0A8I6XVG7_HORVV Phosducin thioredoxin-like domain-containing protein OS=Hordeum vulgare subsp. vulgare OX=112509 PE=3 SV=1	0.643301	0.270888	0.000562739	0.421091	-2.13312
A0A8I6XVJ5	>tr|A0A8I6XVJ5|A0A8I6XVJ5_HORVV Plastid division regulator MinE OS=Hordeum vulgare subsp. vulgare OX=112509 PE=3 SV=1	0.302812	0.233258	0.114576	0.770304	-0.64363
A0A8I6XVL3	>tr|A0A8I6XVL3|A0A8I6XVL3_HORVV Flavin-containing monooxygenase OS=Hordeum vulgare subsp. vulgare OX=112509 PE=3 SV=1	0.575926	0.533494	0.430109	0.926324	-0.188749
A0A8I6XVL6	>tr|A0A8I6XVL6|A0A8I6XVL6_HORVV Small nuclear ribonucleoprotein Sm D3 OS=Hordeum vulgare subsp. vulgare OX=112509 PE=3 SV=1	0.776481	0.773346	0.983474	0.995962	-0.00997916
A0A8I6XVR0	>tr|A0A8I6XVR0|A0A8I6XVR0_HORVV Cupin type-1 domain-containing protein OS=Hordeum vulgare subsp. vulgare OX=112509 PE=4 SV=1	0.74072	0.732601	0.963018	0.989038	-0.0271845
A0A8I6XVS0	>tr|A0A8I6XVS0|A0A8I6XVS0_HORVV Clp R domain-containing protein OS=Hordeum vulgare subsp. vulgare OX=112509 PE=3 SV=1	4.52718	3.35148	0.330327	0.740303	-0.741606
A0A8I6XVT7	>tr|A0A8I6XVT7|A0A8I6XVT7_HORVV Transducin/WD40 repeat-like superfamily protein OS=Hordeum vulgare subsp. vulgare OX=112509 PE=3 SV=1	0.949358	0.806695	0.178191	0.849727	-0.401614
A0A8I6XVT9	>tr|A0A8I6XVT9|A0A8I6XVT9_HORVV Histone H2A/H2B/H3 domain-containing protein OS=Hordeum vulgare subsp. vulgare OX=112509 PE=3 SV=1	0.832483	0.697221	0.593156	0.83752	-0.437302
A0A8I6XVX7	>tr|A0A8I6XVX7|A0A8I6XVX7_HORVV Histidine-containing phosphotransfer protein OS=Hordeum vulgare subsp. vulgare OX=112509 PE=4 SV=1	0.385712	0.152654	0.0604581	0.395773	-2.28605
A0A8I6XW48	>tr|A0A8I6XW48|A0A8I6XW48_HORVV phosphopyruvate hydratase OS=Hordeum vulgare subsp. vulgare OX=112509 PE=3 SV=1	16.9446	15.4345	0.585652	0.910883	-0.230208
A0A8I6XW60	>tr|A0A8I6XW60|A0A8I6XW60_HORVV Uncharacterized protein OS=Hordeum vulgare subsp. vulgare OX=112509 PE=4 SV=1	0.855252	0.591459	0.258872	0.691562	-0.909579
A0A8I6XWE1	>tr|A0A8I6XWE1|A0A8I6XWE1_HORVV 2-isopropylmalate synthase OS=Hordeum vulgare subsp. vulgare OX=112509 PE=3 SV=1	4.36627	3.86782	0.257816	0.885843	-0.298955
A0A8I6XWG4	>tr|A0A8I6XWG4|A0A8I6XWG4_HORVV PDZ domain-containing protein OS=Hordeum vulgare subsp. vulgare OX=112509 PE=3 SV=1	0.742886	0.51192	0.258027	0.689097	-0.918386
A0A8I6XWI0	>tr|A0A8I6XWI0|A0A8I6XWI0_HORVV IGR domain-containing protein OS=Hordeum vulgare subsp. vulgare OX=112509 PE=4 SV=1	0.45515	0.421845	0.824002	0.926828	-0.187409
A0A8I6XWI5	>tr|A0A8I6XWI5|A0A8I6XWI5_HORVV NADH dehydrogenase [ubiquinone] iron-sulfur protein 1, mitochondrial OS=Hordeum vulgare subsp. vulgare OX=112509 PE=3 SV=1	1.15044	2.5132	0.229438	2.18455	1.92719
A0A8I6XWI8	>tr|A0A8I6XWI8|A0A8I6XWI8_HORVV RNase III domain-containing protein OS=Hordeum vulgare subsp. vulgare OX=112509 PE=4 SV=1	1.95176	1.55919	0.442617	0.798864	-0.553844
A0A8I6XWI9	>tr|A0A8I6XWI9|A0A8I6XWI9_HORVV Serine/threonine-protein phosphatase OS=Hordeum vulgare subsp. vulgare OX=112509 PE=3 SV=1	0.606863	0.575916	0.644117	0.949004	-0.129091
A0A8I6XWJ2	>tr|A0A8I6XWJ2|A0A8I6XWJ2_HORVV HMA domain-containing protein OS=Hordeum vulgare subsp. vulgare OX=112509 PE=4 SV=1	0.406734	0.390733	0.765209	0.960661	-0.0989831
A0A8I6XWK3	>tr|A0A8I6XWK3|A0A8I6XWK3_HORVV Carotenoid cleavage dioxygenase 1 OS=Hordeum vulgare subsp. vulgare OX=112509 PE=3 SV=1	0.452731	0.494618	0.564252	1.09252	0.218237
A0A8I6XWL6	>tr|A0A8I6XWL6|A0A8I6XWL6_HORVV 26S proteasome non-ATPase regulatory subunit 10 OS=Hordeum vulgare subsp. vulgare OX=112509 PE=4 SV=1	4.11804	2.56517	0.376153	0.62291	-1.16743
A0A8I6XWN0	>tr|A0A8I6XWN0|A0A8I6XWN0_HORVV Histone H2A OS=Hordeum vulgare subsp. vulgare OX=112509 PE=3 SV=1	0.608057	0.328174	0.171023	0.539709	-1.52103
A0A8I6XWP1	>tr|A0A8I6XWP1|A0A8I6XWP1_HORVV Transducin beta-like protein 2 OS=Hordeum vulgare subsp. vulgare OX=112509 PE=4 SV=1	0.697332	0.824925	0.392851	1.18297	0.414415
A0A8I6XWP4	>tr|A0A8I6XWP4|A0A8I6XWP4_HORVV BSD domain-containing protein OS=Hordeum vulgare subsp. vulgare OX=112509 PE=4 SV=1	1.08496	1.10638	0.965987	1.01975	0.0482327
A0A8I6XWQ1	>tr|A0A8I6XWQ1|A0A8I6XWQ1_HORVV W2 domain-containing protein OS=Hordeum vulgare subsp. vulgare OX=112509 PE=3 SV=1	1.24762	0.877897	0.163417	0.703658	-0.866815
A0A8I6XWQ8	>tr|A0A8I6XWQ8|A0A8I6XWQ8_HORVV Hyaluronan/mRNA-binding protein domain-containing protein OS=Hordeum vulgare subsp. vulgare OX=112509 PE=4 SV=1	7.80123	6.18966	0.251172	0.793421	-0.570707
A0A8I6XWS0	>tr|A0A8I6XWS0|A0A8I6XWS0_HORVV Fe2OG dioxygenase domain-containing protein OS=Hordeum vulgare subsp. vulgare OX=112509 PE=3 SV=1	0.512097	1.56591	0.0729954	3.05785	2.75661
A0A8I6XWW8	>tr|A0A8I6XWW8|A0A8I6XWW8_HORVV Dehydrin OS=Hordeum vulgare subsp. vulgare OX=112509 PE=3 SV=1	40.0781	28.0638	0.0779707	0.700227	-0.878868
A0A8I6XWZ3	>tr|A0A8I6XWZ3|A0A8I6XWZ3_HORVV GRAM domain-containing protein OS=Hordeum vulgare subsp. vulgare OX=112509 PE=3 SV=1	0.709526	0.580999	0.16902	0.818855	-0.492887
A0A8I6XX14	>tr|A0A8I6XX14|A0A8I6XX14_HORVV Auxin-repressed protein OS=Hordeum vulgare subsp. vulgare OX=112509 PE=3 SV=1	3.91455	3.03751	0.132478	0.775955	-0.625606
A0A8I6XX25	>tr|A0A8I6XX25|A0A8I6XX25_HORVV Glycosyltransferase OS=Hordeum vulgare subsp. vulgare OX=112509 PE=3 SV=1	0.662803	0.758327	0.412432	1.14412	0.332057
A0A8I6XX58	>tr|A0A8I6XX58|A0A8I6XX58_HORVV Ribosomal RNA-processing protein 43 OS=Hordeum vulgare subsp. vulgare OX=112509 PE=3 SV=1	0.761977	0.632604	0.377394	0.830214	-0.45891
A0A8I6XX62	>tr|A0A8I6XX62|A0A8I6XX62_HORVV Aldehyde oxidase OS=Hordeum vulgare subsp. vulgare OX=112509 PE=3 SV=1	2.15285	2.0954	0.973517	0.973316	-0.0667045
A0A8I6XX67	>tr|A0A8I6XX67|A0A8I6XX67_HORVV RRM domain-containing protein OS=Hordeum vulgare subsp. vulgare OX=112509 PE=4 SV=1	1.57442	1.19532	0.332774	0.759212	-0.679401
A0A8I6XX74	>tr|A0A8I6XX74|A0A8I6XX74_HORVV Glutamate carboxypeptidase 2 OS=Hordeum vulgare subsp. vulgare OX=112509 PE=3 SV=1	3.64748	3.90406	0.716253	1.07034	0.167661
A0A8I6XX88	>tr|A0A8I6XX88|A0A8I6XX88_HORVV RuBisCO large subunit-binding protein subunit beta, chloroplastic OS=Hordeum vulgare subsp. vulgare OX=112509 PE=3 SV=1	1.62277	2.02613	0.0849852	1.24857	0.547509
A0A8I6XX99	>tr|A0A8I6XX99|A0A8I6XX99_HORVV Semialdehyde dehydrogenase NAD-binding domain-containing protein OS=Hordeum vulgare subsp. vulgare OX=112509 PE=3 SV=1	0.884783	0.995587	0.714337	1.12523	0.290999
A0A8I6XXB5	>tr|A0A8I6XXB5|A0A8I6XXB5_HORVV GMP synthase [glutamine-hydrolyzing] OS=Hordeum vulgare subsp. vulgare OX=112509 PE=3 SV=1	0.736965	0.657239	0.75668	0.891819	-0.282373
A0A8I6XXC3	>tr|A0A8I6XXC3|A0A8I6XXC3_HORVV Peptidase A1 domain-containing protein OS=Hordeum vulgare subsp. vulgare OX=112509 PE=3 SV=1	1.30632	3.17419	0.0343735	2.42988	2.18968
A0A8I6XXG7	>tr|A0A8I6XXG7|A0A8I6XXG7_HORVV Acetyltransferase component of pyruvate dehydrogenase complex OS=Hordeum vulgare subsp. vulgare OX=112509 PE=3 SV=1	2.02389	1.77871	0.402588	0.878858	-0.318478
A0A8I6XXH4	>tr|A0A8I6XXH4|A0A8I6XXH4_HORVV 3-hydroxyisobutyryl-CoA hydrolase OS=Hordeum vulgare subsp. vulgare OX=112509 PE=3 SV=1	0.753987	0.654944	0.274288	0.868641	-0.347317
A0A8I6XXH8	>tr|A0A8I6XXH8|A0A8I6XXH8_HORVV adenine phosphoribosyltransferase OS=Hordeum vulgare subsp. vulgare OX=112509 PE=3 SV=1	1.25837	1.48369	0.477144	1.17905	0.406226
A0A8I6XXP7	>tr|A0A8I6XXP7|A0A8I6XXP7_HORVV Heat shock 70 kDa protein, mitochondrial OS=Hordeum vulgare subsp. vulgare OX=112509 PE=3 SV=1	6.76102	5.78272	0.388313	0.855303	-0.385482
A0A8I6XXQ4	>tr|A0A8I6XXQ4|A0A8I6XXQ4_HORVV ACT domain-containing protein OS=Hordeum vulgare subsp. vulgare OX=112509 PE=3 SV=1	0.662747	0.510447	0.553446	0.7702	-0.643965
A0A8I6XXV9	>tr|A0A8I6XXV9|A0A8I6XXV9_HORVV Alpha-amylase OS=Hordeum vulgare subsp. vulgare OX=112509 PE=3 SV=1	4.46037	4.75337	0.784267	1.06569	0.156908
A0A8I6XXX7	>tr|A0A8I6XXX7|A0A8I6XXX7_HORVV Protein TPLATE OS=Hordeum vulgare subsp. vulgare OX=112509 PE=4 SV=1	0.637935	0.665014	0.67573	1.04245	0.102529
A0A8I6XY02	>tr|A0A8I6XY02|A0A8I6XY02_HORVV Elongation factor P OS=Hordeum vulgare subsp. vulgare OX=112509 PE=3 SV=1	0.498179	0.407974	0.664906	0.818932	-0.492656
A0A8I6XY07	>tr|A0A8I6XY07|A0A8I6XY07_HORVV DNA gyrase subunit B OS=Hordeum vulgare subsp. vulgare OX=112509 PE=3 SV=1	0.837523	0.863968	0.714613	1.03157	0.0766692
A0A8I6XY30	>tr|A0A8I6XY30|A0A8I6XY30_HORVV J domain-containing protein OS=Hordeum vulgare subsp. vulgare OX=112509 PE=4 SV=1	1.44441	0.992252	0.341698	0.686959	-0.92605
A0A8I6XY39	>tr|A0A8I6XY39|A0A8I6XY39_HORVV X8 domain-containing protein OS=Hordeum vulgare subsp. vulgare OX=112509 PE=3 SV=1	0.457948	0.487857	0.768139	1.06531	0.156032
A0A8I6XY40	>tr|A0A8I6XY40|A0A8I6XY40_HORVV Uncharacterized protein OS=Hordeum vulgare subsp. vulgare OX=112509 PE=4 SV=1	1.0116	1.29159	0.357501	1.27678	0.602627
A0A8I6XY73	>tr|A0A8I6XY73|A0A8I6XY73_HORVV WH1 domain-containing protein OS=Hordeum vulgare subsp. vulgare OX=112509 PE=3 SV=1	0.370787	0.296681	0.441907	0.800138	-0.549915
A0A8I6XYC7	>tr|A0A8I6XYC7|A0A8I6XYC7_HORVV Vacuolar import/degradation Vid27 C-terminal domain-containing protein OS=Hordeum vulgare subsp. vulgare OX=112509 PE=4 SV=1	0.735926	0.442066	0.116966	0.600694	-1.257
A0A8I6XYE4	>tr|A0A8I6XYE4|A0A8I6XYE4_HORVV glucan endo-1,3-beta-D-glucosidase OS=Hordeum vulgare subsp. vulgare OX=112509 PE=3 SV=1	0.63255	0.555948	0.360637	0.8789	-0.31836
A0A8I6XYJ7	>tr|A0A8I6XYJ7|A0A8I6XYJ7_HORVV Elongin-C OS=Hordeum vulgare subsp. vulgare OX=112509 PE=3 SV=1	0.555935	0.657715	0.721709	1.18308	0.414638
A0A8I6XYL6	>tr|A0A8I6XYL6|A0A8I6XYL6_HORVV RNA helicase OS=Hordeum vulgare subsp. vulgare OX=112509 PE=3 SV=1	0.575967	0.460164	0.283262	0.798941	-0.553606
A0A8I6XYN6	>tr|A0A8I6XYN6|A0A8I6XYN6_HORVV aldehyde dehydrogenase (NAD(+)) OS=Hordeum vulgare subsp. vulgare OX=112509 PE=3 SV=1	5.22879	4.7816	0.432964	0.914476	-0.220498
A0A8I6XYT5	>tr|A0A8I6XYT5|A0A8I6XYT5_HORVV Leucine-rich repeat-containing N-terminal plant-type domain-containing protein OS=Hordeum vulgare subsp. vulgare OX=112509 PE=4 SV=1	0.644543	0.57574	0.629973	0.893254	-0.278408
A0A8I6XYT6	>tr|A0A8I6XYT6|A0A8I6XYT6_HORVV Aspartic proteinase oryzasin-1 OS=Hordeum vulgare subsp. vulgare OX=112509 PE=3 SV=1	11.1157	10.7419	0.598483	0.966371	-0.0843669
A0A8I6XYU0	>tr|A0A8I6XYU0|A0A8I6XYU0_HORVV Protein ROOT HAIR DEFECTIVE 3 homolog OS=Hordeum vulgare subsp. vulgare OX=112509 PE=3 SV=1	2.74833	2.33043	0.398632	0.847941	-0.406802
A0A8I6XYU1	>tr|A0A8I6XYU1|A0A8I6XYU1_HORVV RNA helicase OS=Hordeum vulgare subsp. vulgare OX=112509 PE=4 SV=1	0.485739	0.739019	0.0926502	1.52143	1.03499
A0A8I6XYW9	>tr|A0A8I6XYW9|A0A8I6XYW9_HORVV V-type proton ATPase subunit OS=Hordeum vulgare subsp. vulgare OX=112509 PE=3 SV=1	1.71321	1.91008	0.301508	1.11491	0.268273
A0A8I6XYX2	>tr|A0A8I6XYX2|A0A8I6XYX2_HORVV Fe2OG dioxygenase domain-containing protein OS=Hordeum vulgare subsp. vulgare OX=112509 PE=3 SV=1	2.91413	2.72931	0.813292	0.93658	-0.161593
A0A8I6XYY0	>tr|A0A8I6XYY0|A0A8I6XYY0_HORVV rRNA N-glycosidase OS=Hordeum vulgare subsp. vulgare OX=112509 PE=4 SV=1	0.948448	0.762084	0.419672	0.803507	-0.539552
A0A8I6XZ01	>tr|A0A8I6XZ01|A0A8I6XZ01_HORVV Glycine-rich protein OS=Hordeum vulgare subsp. vulgare OX=112509 PE=4 SV=1	1.14468	0.871305	0.368631	0.761175	-0.673034
A0A8I6XZ03	>tr|A0A8I6XZ03|A0A8I6XZ03_HORVV GRAM domain-containing protein OS=Hordeum vulgare subsp. vulgare OX=112509 PE=3 SV=1	5.41718	4.33728	0.299328	0.800653	-0.548328
A0A8I6XZ47	>tr|A0A8I6XZ47|A0A8I6XZ47_HORVV TRIP4/RQT4 C2HC5-type zinc finger domain-containing protein OS=Hordeum vulgare subsp. vulgare OX=112509 PE=4 SV=1	0.65764	0.626722	0.475918	0.952986	-0.118765
A0A8I6XZ69	>tr|A0A8I6XZ69|A0A8I6XZ69_HORVV Ubiquitin-like modifier-activating enzyme ATG7 OS=Hordeum vulgare subsp. vulgare OX=112509 PE=4 SV=1	0.635674	0.550105	0.460502	0.865388	-0.356572
A0A8I6XZ94	>tr|A0A8I6XZ94|A0A8I6XZ94_HORVV Galactokinase OS=Hordeum vulgare subsp. vulgare OX=112509 PE=3 SV=1	1.62766	1.6077	0.931816	0.987733	-0.0304402
A0A8I6XZA2	>tr|A0A8I6XZA2|A0A8I6XZA2_HORVV Sm domain-containing protein OS=Hordeum vulgare subsp. vulgare OX=112509 PE=3 SV=1	0.326469	0.288	0.712913	0.882169	-0.309206
A0A8I6XZJ6	>tr|A0A8I6XZJ6|A0A8I6XZJ6_HORVV Uncharacterized protein OS=Hordeum vulgare subsp. vulgare OX=112509 PE=4 SV=1	0.529812	0.563449	0.782553	1.06349	0.151814
A0A8I6XZL8	>tr|A0A8I6XZL8|A0A8I6XZL8_HORVV Isocitrate dehydrogenase [NADP] OS=Hordeum vulgare subsp. vulgare OX=112509 PE=3 SV=1	3.04227	3.25963	0.616753	1.07145	0.1702
A0A8I6XZQ1	>tr|A0A8I6XZQ1|A0A8I6XZQ1_HORVV Subtilisin-like protease OS=Hordeum vulgare subsp. vulgare OX=112509 PE=3 SV=1	1.22464	1.02238	0.130089	0.834838	-0.445212
A0A8I6XZS1	>tr|A0A8I6XZS1|A0A8I6XZS1_HORVV EF-hand domain-containing protein OS=Hordeum vulgare subsp. vulgare OX=112509 PE=4 SV=1	1.07232	0.615349	0.316213	0.57385	-1.36975
A0A8I6XZU9	>tr|A0A8I6XZU9|A0A8I6XZU9_HORVV Ferritin OS=Hordeum vulgare subsp. vulgare OX=112509 PE=3 SV=1	2.79209	2.05914	0.0858619	0.737492	-0.750991
A0A8I6XZV4	>tr|A0A8I6XZV4|A0A8I6XZV4_HORVV DEK-C domain-containing protein OS=Hordeum vulgare subsp. vulgare OX=112509 PE=4 SV=1	1.10357	0.93626	0.443458	0.848392	-0.40549
A0A8I6XZV6	>tr|A0A8I6XZV6|A0A8I6XZV6_HORVV Clathrin heavy chain OS=Hordeum vulgare subsp. vulgare OX=112509 PE=3 SV=1	0.438596	1.04483	0.076913	2.38222	2.14083
A0A8I6XZV8	>tr|A0A8I6XZV8|A0A8I6XZV8_HORVV Uncharacterized protein OS=Hordeum vulgare subsp. vulgare OX=112509 PE=4 SV=1	0.532155	0.420544	0.580939	0.790266	-0.580532
A0A8I6XZX3	>tr|A0A8I6XZX3|A0A8I6XZX3_HORVV hydroxymethylbilane synthase OS=Hordeum vulgare subsp. vulgare OX=112509 PE=3 SV=1	0.732584	0.772736	0.771054	1.05481	0.131604
A0A8I6XZY2	>tr|A0A8I6XZY2|A0A8I6XZY2_HORVV carbamoyl-phosphate synthase (glutamine-hydrolyzing) OS=Hordeum vulgare subsp. vulgare OX=112509 PE=3 SV=1	0.692077	0.670293	0.953049	0.968524	-0.0788776
A0A8I6XZY4	>tr|A0A8I6XZY4|A0A8I6XZY4_HORVV Uncharacterized protein OS=Hordeum vulgare subsp. vulgare OX=112509 PE=4 SV=1	0.406546	0.510441	0.49487	1.25555	0.561273
A0A8I6Y013	>tr|A0A8I6Y013|A0A8I6Y013_HORVV Uncharacterized protein OS=Hordeum vulgare subsp. vulgare OX=112509 PE=4 SV=1	1.72636	1.57824	0.683076	0.914199	-0.221244
A0A8I6Y014	>tr|A0A8I6Y014|A0A8I6Y014_HORVV PX domain-containing protein OS=Hordeum vulgare subsp. vulgare OX=112509 PE=4 SV=1	0.552539	0.366116	0.253149	0.662606	-1.01507
A0A8I6Y016	>tr|A0A8I6Y016|A0A8I6Y016_HORVV Uncharacterized protein OS=Hordeum vulgare subsp. vulgare OX=112509 PE=4 SV=1	2.97542	2.81072	0.922879	0.944646	-0.140443
A0A8I6Y022	>tr|A0A8I6Y022|A0A8I6Y022_HORVV Enoyl reductase (ER) domain-containing protein OS=Hordeum vulgare subsp. vulgare OX=112509 PE=4 SV=1	0.63638	0.657663	0.911372	1.03344	0.0811336
A0A8I6Y031	>tr|A0A8I6Y031|A0A8I6Y031_HORVV CBS domain-containing protein OS=Hordeum vulgare subsp. vulgare OX=112509 PE=4 SV=1	0.83472	0.646699	0.264523	0.774749	-0.629441
A0A8I6Y052	>tr|A0A8I6Y052|A0A8I6Y052_HORVV VPS37 C-terminal domain-containing protein OS=Hordeum vulgare subsp. vulgare OX=112509 PE=3 SV=1	1.17317	0.8062	0.406589	0.687197	-0.925194
A0A8I6Y060	>tr|A0A8I6Y060|A0A8I6Y060_HORVV NTF2 domain-containing protein OS=Hordeum vulgare subsp. vulgare OX=112509 PE=4 SV=1	2.53379	5.75241	0.0173435	2.27028	2.02213
A0A8I6Y080	>tr|A0A8I6Y080|A0A8I6Y080_HORVV Auxin transport protein BIG OS=Hordeum vulgare subsp. vulgare OX=112509 PE=3 SV=1	0.717082	0.66677	0.830203	0.929838	-0.179411
A0A8I6Y0A2	>tr|A0A8I6Y0A2|A0A8I6Y0A2_HORVV 4-hydroxy-7-methoxy-3-oxo-3,4-dihydro-2H-1,4-benzoxazin-2-yl glucosidebeta-D-glucosidase OS=Hordeum vulgare subsp. vulgare OX=112509 PE=3 SV=1	0.986372	0.744507	0.272306	0.754793	-0.693799
A0A8I6Y0C6	>tr|A0A8I6Y0C6|A0A8I6Y0C6_HORVV MHD domain-containing protein OS=Hordeum vulgare subsp. vulgare OX=112509 PE=3 SV=1	2.69883	2.47738	0.460022	0.917944	-0.211163
A0A8I6Y0E9	>tr|A0A8I6Y0E9|A0A8I6Y0E9_HORVV Uncharacterized protein OS=Hordeum vulgare subsp. vulgare OX=112509 PE=4 SV=1	1.0482	0.833355	0.238289	0.795033	-0.565701
A0A8I6Y0G0	>tr|A0A8I6Y0G0|A0A8I6Y0G0_HORVV Protein kinase domain-containing protein OS=Hordeum vulgare subsp. vulgare OX=112509 PE=4 SV=1	0.394068	0.323347	0.580296	0.820538	-0.487824
A0A8I6Y0G6	>tr|A0A8I6Y0G6|A0A8I6Y0G6_HORVV GrpE protein homolog OS=Hordeum vulgare subsp. vulgare OX=112509 PE=3 SV=1	6.56393	5.6877	0.24319	0.866508	-0.35338
A0A8I6Y0N9	>tr|A0A8I6Y0N9|A0A8I6Y0N9_HORVV CTLH domain-containing protein OS=Hordeum vulgare subsp. vulgare OX=112509 PE=4 SV=1	1.0137	1.16995	0.470085	1.15414	0.353552
A0A8I6Y0P7	>tr|A0A8I6Y0P7|A0A8I6Y0P7_HORVV Peptidase A1 domain-containing protein OS=Hordeum vulgare subsp. vulgare OX=112509 PE=3 SV=1	2.84933	2.65658	0.541468	0.932352	-0.172752
A0A8I6Y0T3	>tr|A0A8I6Y0T3|A0A8I6Y0T3_HORVV ER lumen protein-retaining receptor OS=Hordeum vulgare subsp. vulgare OX=112509 PE=3 SV=1	5.65324	5.22947	0.0907649	0.925041	-0.192168
A0A8I6Y0T5	>tr|A0A8I6Y0T5|A0A8I6Y0T5_HORVV Phosphoglycerate kinase OS=Hordeum vulgare subsp. vulgare OX=112509 PE=3 SV=1	20.5463	18.4924	0.517967	0.900038	-0.259746
A0A8I6Y0T7	>tr|A0A8I6Y0T7|A0A8I6Y0T7_HORVV 26S proteasome regulatory subunit RPN10 OS=Hordeum vulgare subsp. vulgare OX=112509 PE=3 SV=1	0.622916	0.514803	0.0707629	0.826441	-0.470145
A0A8I6Y0W7	>tr|A0A8I6Y0W7|A0A8I6Y0W7_HORVV RRM domain-containing protein OS=Hordeum vulgare subsp. vulgare OX=112509 PE=4 SV=1	11.8585	12.0755	0.87251	1.0183	0.0447274
A0A8I6Y0X3	>tr|A0A8I6Y0X3|A0A8I6Y0X3_HORVV S-adenosylmethionine synthase OS=Hordeum vulgare subsp. vulgare OX=112509 PE=3 SV=1	3.9187	2.77991	0.19039	0.709398	-0.846778
A0A8I6Y0X7	>tr|A0A8I6Y0X7|A0A8I6Y0X7_HORVV Fumarylacetoacetase OS=Hordeum vulgare subsp. vulgare OX=112509 PE=3 SV=1	0.76738	0.872057	0.756693	1.13641	0.315373
A0A8I6Y0Y7	>tr|A0A8I6Y0Y7|A0A8I6Y0Y7_HORVV TBCC domain-containing protein 1 OS=Hordeum vulgare subsp. vulgare OX=112509 PE=3 SV=1	0.717053	0.818565	0.404638	1.14157	0.326545
A0A8I6Y0Z6	>tr|A0A8I6Y0Z6|A0A8I6Y0Z6_HORVV Molybdopterin synthase catalytic subunit OS=Hordeum vulgare subsp. vulgare OX=112509 PE=3 SV=1	0.379453	0.416128	0.788833	1.09665	0.22755
A0A8I6Y119	>tr|A0A8I6Y119|A0A8I6Y119_HORVV RRM domain-containing protein OS=Hordeum vulgare subsp. vulgare OX=112509 PE=4 SV=1	1.1645	1.54158	0.157644	1.32381	0.691841
A0A8I6Y124	>tr|A0A8I6Y124|A0A8I6Y124_HORVV dihydroorotase OS=Hordeum vulgare subsp. vulgare OX=112509 PE=3 SV=1	0.531187	0.538835	0.976851	1.0144	0.035254
A0A8I6Y180	>tr|A0A8I6Y180|A0A8I6Y180_HORVV Expansin OS=Hordeum vulgare subsp. vulgare OX=112509 PE=3 SV=1	0.575145	0.416715	0.27658	0.72454	-0.794687
A0A8I6Y184	>tr|A0A8I6Y184|A0A8I6Y184_HORVV Pre-mRNA-processing factor 39 OS=Hordeum vulgare subsp. vulgare OX=112509 PE=3 SV=1	0.532591	0.376017	0.124061	0.706015	-0.858566
A0A8I6Y1B6	>tr|A0A8I6Y1B6|A0A8I6Y1B6_HORVV Aspartate aminotransferase OS=Hordeum vulgare subsp. vulgare OX=112509 PE=3 SV=1	15.8397	14.181	0.647712	0.895278	-0.272825
A0A8I6Y1C6	>tr|A0A8I6Y1C6|A0A8I6Y1C6_HORVV 4-coumarate--CoA ligase OS=Hordeum vulgare subsp. vulgare OX=112509 PE=3 SV=1	0.867115	0.701399	0.0619982	0.808888	-0.52309
A0A8I6Y1D4	>tr|A0A8I6Y1D4|A0A8I6Y1D4_HORVV Mitochondrial import inner membrane translocase subunit TIM50 OS=Hordeum vulgare subsp. vulgare OX=112509 PE=3 SV=1	0.8253	0.780401	0.81785	0.945597	-0.137962
A0A8I6Y1F1	>tr|A0A8I6Y1F1|A0A8I6Y1F1_HORVV Ubiquitin receptor RAD23 OS=Hordeum vulgare subsp. vulgare OX=112509 PE=3 SV=1	2.78266	3.03742	0.762268	1.09155	0.216052
A0A8I6Y1I0	>tr|A0A8I6Y1I0|A0A8I6Y1I0_HORVV AAA+ ATPase domain-containing protein OS=Hordeum vulgare subsp. vulgare OX=112509 PE=3 SV=1	3.91374	4.02266	0.910666	1.02783	0.0677029
A0A8I6Y1K9	>tr|A0A8I6Y1K9|A0A8I6Y1K9_HORVV Uncharacterized protein OS=Hordeum vulgare subsp. vulgare OX=112509 PE=4 SV=1	0.981636	0.83469	0.790199	0.850305	-0.399937
A0A8I6Y1N3	>tr|A0A8I6Y1N3|A0A8I6Y1N3_HORVV Cell division cycle protein 48 homolog OS=Hordeum vulgare subsp. vulgare OX=112509 PE=3 SV=1	4.01745	3.5153	0.240951	0.875007	-0.32931
A0A8I6Y1N8	>tr|A0A8I6Y1N8|A0A8I6Y1N8_HORVV J domain-containing protein OS=Hordeum vulgare subsp. vulgare OX=112509 PE=4 SV=1	0.842354	0.344866	0.0202749	0.409408	-2.20252
A0A8I6Y1U6	>tr|A0A8I6Y1U6|A0A8I6Y1U6_HORVV Mitogen-activated protein kinase OS=Hordeum vulgare subsp. vulgare OX=112509 PE=3 SV=1	0.57191	0.572382	0.994807	1.00083	0.00203493
A0A8I6Y1V5	>tr|A0A8I6Y1V5|A0A8I6Y1V5_HORVV Uncharacterized protein OS=Hordeum vulgare subsp. vulgare OX=112509 PE=4 SV=1	0.685346	0.766853	0.571452	1.11893	0.277143
A0A8I6Y1V9	>tr|A0A8I6Y1V9|A0A8I6Y1V9_HORVV GST N-terminal domain-containing protein OS=Hordeum vulgare subsp. vulgare OX=112509 PE=4 SV=1	9.82264	7.39476	0.164465	0.752828	-0.70023
A0A8I6Y1X3	>tr|A0A8I6Y1X3|A0A8I6Y1X3_HORVV Uncharacterized protein OS=Hordeum vulgare subsp. vulgare OX=112509 PE=3 SV=1	31.7701	27.2263	0.240422	0.856979	-0.380654
A0A8I6Y1Y4	>tr|A0A8I6Y1Y4|A0A8I6Y1Y4_HORVV Peptidyl-prolyl cis-trans isomerase OS=Hordeum vulgare subsp. vulgare OX=112509 PE=3 SV=1	20.8172	19.5948	0.761067	0.941282	-0.149243
A0A8I6Y1Z6	>tr|A0A8I6Y1Z6|A0A8I6Y1Z6_HORVV Histone H2B OS=Hordeum vulgare subsp. vulgare OX=112509 PE=3 SV=1	2.03467	1.77928	0.663649	0.874483	-0.330787
A0A8I6Y204	>tr|A0A8I6Y204|A0A8I6Y204_HORVV SMP domain-containing protein OS=Hordeum vulgare subsp. vulgare OX=112509 PE=3 SV=1	17.9412	16.2274	0.612859	0.904479	-0.247607
A0A8I6Y212	>tr|A0A8I6Y212|A0A8I6Y212_HORVV Nitroreductase domain-containing protein OS=Hordeum vulgare subsp. vulgare OX=112509 PE=4 SV=1	0.980593	0.843374	0.382373	0.860065	-0.37179
A0A8I6Y252	>tr|A0A8I6Y252|A0A8I6Y252_HORVV Uncharacterized protein OS=Hordeum vulgare subsp. vulgare OX=112509 PE=3 SV=1	1.885	1.01346	0.36758	0.537645	-1.53048
A0A8I6Y288	>tr|A0A8I6Y288|A0A8I6Y288_HORVV SHSP domain-containing protein OS=Hordeum vulgare subsp. vulgare OX=112509 PE=3 SV=1	12.5106	11.7635	0.588055	0.940285	-0.151856
A0A8I6Y299	>tr|A0A8I6Y299|A0A8I6Y299_HORVV SH3 domain-containing protein OS=Hordeum vulgare subsp. vulgare OX=112509 PE=4 SV=1	0.575746	0.32058	0.0903384	0.556808	-1.4441
A0A8I6Y2D4	>tr|A0A8I6Y2D4|A0A8I6Y2D4_HORVV MIP18 family-like domain-containing protein OS=Hordeum vulgare subsp. vulgare OX=112509 PE=3 SV=1	0.534085	0.518974	0.8353	0.971706	-0.070788
A0A8I6Y2H2	>tr|A0A8I6Y2H2|A0A8I6Y2H2_HORVV UBC core domain-containing protein OS=Hordeum vulgare subsp. vulgare OX=112509 PE=3 SV=1	0.976056	1.3632	0.399352	1.39664	0.823923
A0A8I6Y2J8	>tr|A0A8I6Y2J8|A0A8I6Y2J8_HORVV Zinc finger CCCH domain-containing protein 16 OS=Hordeum vulgare subsp. vulgare OX=112509 PE=4 SV=1	0.543249	0.471481	0.185008	0.867891	-0.34945
A0A8I6Y2L6	>tr|A0A8I6Y2L6|A0A8I6Y2L6_HORVV LysM domain-containing protein OS=Hordeum vulgare subsp. vulgare OX=112509 PE=4 SV=1	0.62333	0.578748	0.594466	0.928478	-0.183022
A0A8I6Y2M3	>tr|A0A8I6Y2M3|A0A8I6Y2M3_HORVV Eukaryotic translation initiation factor 2A OS=Hordeum vulgare subsp. vulgare OX=112509 PE=3 SV=1	0.670236	0.675733	0.953295	1.0082	0.0201432
A0A8I6Y2M5	>tr|A0A8I6Y2M5|A0A8I6Y2M5_HORVV Alpha/beta hydrolase fold-3 domain-containing protein OS=Hordeum vulgare subsp. vulgare OX=112509 PE=4 SV=1	0.550349	0.312379	0.173733	0.567601	-1.39676
A0A8I6Y2P0	>tr|A0A8I6Y2P0|A0A8I6Y2P0_HORVV Uncharacterized protein OS=Hordeum vulgare subsp. vulgare OX=112509 PE=4 SV=1	4.87969	3.57905	0.317104	0.73346	-0.764511
A0A8I6Y2R3	>tr|A0A8I6Y2R3|A0A8I6Y2R3_HORVV Glucose-6-phosphate isomerase OS=Hordeum vulgare subsp. vulgare OX=112509 PE=3 SV=1	3.20179	2.7383	0.386206	0.85524	-0.385665
A0A8I6Y2R6	>tr|A0A8I6Y2R6|A0A8I6Y2R6_HORVV Adenosine kinase OS=Hordeum vulgare subsp. vulgare OX=112509 PE=3 SV=1	4.0993	3.8579	0.639784	0.941113	-0.149686
A0A8I6Y2R8	>tr|A0A8I6Y2R8|A0A8I6Y2R8_HORVV RNA helicase OS=Hordeum vulgare subsp. vulgare OX=112509 PE=3 SV=1	0.965122	0.589171	0.053553	0.610462	-1.21722
A0A8I6Y2T9	>tr|A0A8I6Y2T9|A0A8I6Y2T9_HORVV Translocase of chloroplast OS=Hordeum vulgare subsp. vulgare OX=112509 PE=3 SV=1	2.21956	3.33295	0.132796	1.50163	1.00267
A0A8I6Y300	>tr|A0A8I6Y300|A0A8I6Y300_HORVV AP2/ERF domain-containing protein OS=Hordeum vulgare subsp. vulgare OX=112509 PE=4 SV=1	0.695477	1.67875	0.226043	2.41381	2.17332
A0A8I6Y307	>tr|A0A8I6Y307|A0A8I6Y307_HORVV Cytidyltransferase-like domain-containing protein OS=Hordeum vulgare subsp. vulgare OX=112509 PE=4 SV=1	0.511188	0.687831	0.582669	1.34555	0.732014
A0A8I6Y358	>tr|A0A8I6Y358|A0A8I6Y358_HORVV Ubiquitin carboxyl-terminal hydrolase OS=Hordeum vulgare subsp. vulgare OX=112509 PE=3 SV=1	3.7234	3.98806	0.756373	1.07108	0.169357
A0A8I6Y359	>tr|A0A8I6Y359|A0A8I6Y359_HORVV Cystatin domain-containing protein OS=Hordeum vulgare subsp. vulgare OX=112509 PE=3 SV=1	0.439198	0.564434	0.272653	1.28515	0.618733
A0A8I6Y364	>tr|A0A8I6Y364|A0A8I6Y364_HORVV Glycosyl hydrolase family 95 N-terminal domain-containing protein OS=Hordeum vulgare subsp. vulgare OX=112509 PE=4 SV=1	1.68865	1.89905	0.730942	1.1246	0.289602
A0A8I6Y3A3	>tr|A0A8I6Y3A3|A0A8I6Y3A3_HORVV Sucrose-phosphate synthase OS=Hordeum vulgare subsp. vulgare OX=112509 PE=3 SV=1	0.864518	0.801398	0.793647	0.926988	-0.186981
A0A8I6Y3B8	>tr|A0A8I6Y3B8|A0A8I6Y3B8_HORVV Uncharacterized protein OS=Hordeum vulgare subsp. vulgare OX=112509 PE=4 SV=1	0.510243	0.232306	0.0038095	0.455285	-1.94056
A0A8I6Y3C4	>tr|A0A8I6Y3C4|A0A8I6Y3C4_HORVV YbaK/aminoacyl-tRNA synthetase-associated domain-containing protein OS=Hordeum vulgare subsp. vulgare OX=112509 PE=4 SV=1	0.5489	0.400881	0.277591	0.730334	-0.775044
A0A8I6Y3C5	>tr|A0A8I6Y3C5|A0A8I6Y3C5_HORVV Cupin type-1 domain-containing protein OS=Hordeum vulgare subsp. vulgare OX=112509 PE=4 SV=1	36.6356	36.6743	0.991473	1.00105	0.00259951
A0A8I6Y3F5	>tr|A0A8I6Y3F5|A0A8I6Y3F5_HORVV Uncharacterized protein OS=Hordeum vulgare subsp. vulgare OX=112509 PE=4 SV=1	2.46211	2.2415	0.762494	0.910396	-0.231526
A0A8I6Y3H7	>tr|A0A8I6Y3H7|A0A8I6Y3H7_HORVV EF-hand domain-containing protein OS=Hordeum vulgare subsp. vulgare OX=112509 PE=4 SV=1	1.00254	0.923736	0.483216	0.921397	-0.201902
A0A8I6Y3I8	>tr|A0A8I6Y3I8|A0A8I6Y3I8_HORVV RNase H type-1 domain-containing protein OS=Hordeum vulgare subsp. vulgare OX=112509 PE=4 SV=1	0.575651	0.509029	0.349909	0.884266	-0.30335
A0A8I6Y3K2	>tr|A0A8I6Y3K2|A0A8I6Y3K2_HORVV Peptidase M20 dimerisation domain-containing protein OS=Hordeum vulgare subsp. vulgare OX=112509 PE=4 SV=1	2.10634	1.47625	0.472964	0.70086	-0.87664
A0A8I6Y3K7	>tr|A0A8I6Y3K7|A0A8I6Y3K7_HORVV Glutathione reductase OS=Hordeum vulgare subsp. vulgare OX=112509 PE=3 SV=1	0.94323	0.795278	0.361748	0.843143	-0.420798
A0A8I6Y3M0	>tr|A0A8I6Y3M0|A0A8I6Y3M0_HORVV DNA/RNA-binding protein Alba-like domain-containing protein OS=Hordeum vulgare subsp. vulgare OX=112509 PE=3 SV=1	1.84969	1.51614	0.699272	0.819672	-0.490428
A0A8I6Y3M8	>tr|A0A8I6Y3M8|A0A8I6Y3M8_HORVV Uncharacterized protein OS=Hordeum vulgare subsp. vulgare OX=112509 PE=4 SV=1	1.40961	0.496382	0.224807	0.35214	-2.57414
A0A8I6Y3M9	>tr|A0A8I6Y3M9|A0A8I6Y3M9_HORVV Serine/threonine-protein phosphatase OS=Hordeum vulgare subsp. vulgare OX=112509 PE=3 SV=1	1.03734	0.944647	0.594318	0.910644	-0.230854
A0A8I6Y3U4	>tr|A0A8I6Y3U4|A0A8I6Y3U4_HORVV MHD domain-containing protein OS=Hordeum vulgare subsp. vulgare OX=112509 PE=3 SV=1	0.688981	0.576399	0.13259	0.836596	-0.440023
A0A8I6Y3W6	>tr|A0A8I6Y3W6|A0A8I6Y3W6_HORVV Zerumbone synthase OS=Hordeum vulgare subsp. vulgare OX=112509 PE=3 SV=1	0.950567	0.69749	0.287576	0.733762	-0.763496
A0A8I6Y3X0	>tr|A0A8I6Y3X0|A0A8I6Y3X0_HORVV ABC transporter domain-containing protein OS=Hordeum vulgare subsp. vulgare OX=112509 PE=4 SV=1	0.717805	0.749954	0.684385	1.04479	0.108061
A0A8I6Y435	>tr|A0A8I6Y435|A0A8I6Y435_HORVV Serpin domain-containing protein OS=Hordeum vulgare subsp. vulgare OX=112509 PE=3 SV=1	9.75748	10.5775	0.627705	1.08404	0.199028
A0A8I6Y459	>tr|A0A8I6Y459|A0A8I6Y459_HORVV EF-hand domain-containing protein OS=Hordeum vulgare subsp. vulgare OX=112509 PE=3 SV=1	1.27091	1.6905	0.309589	1.33015	0.703615
A0A8I6Y469	>tr|A0A8I6Y469|A0A8I6Y469_HORVV Pollen-specific protein C13 OS=Hordeum vulgare subsp. vulgare OX=112509 PE=3 SV=1	0.629218	0.427055	0.163476	0.678707	-0.955853
A0A8I6Y477	>tr|A0A8I6Y477|A0A8I6Y477_HORVV STI1/HOP DP domain-containing protein OS=Hordeum vulgare subsp. vulgare OX=112509 PE=4 SV=1	0.842561	0.657642	0.296351	0.780528	-0.611113
A0A8I6Y493	>tr|A0A8I6Y493|A0A8I6Y493_HORVV Bifunctional inhibitor/plant lipid transfer protein/seed storage helical domain-containing protein OS=Hordeum vulgare subsp. vulgare OX=112509 PE=4 SV=1	2.10733	1.06605	0.0692869	0.505878	-1.68069
A0A8I6Y4E6	>tr|A0A8I6Y4E6|A0A8I6Y4E6_HORVV 4-coumarate--CoA ligase OS=Hordeum vulgare subsp. vulgare OX=112509 PE=3 SV=1	0.668488	0.734495	0.770325	1.09874	0.23224
A0A8I6Y4F0	>tr|A0A8I6Y4F0|A0A8I6Y4F0_HORVV Glycosyltransferase OS=Hordeum vulgare subsp. vulgare OX=112509 PE=3 SV=1	0.689377	0.648109	0.490617	0.940138	-0.15224
A0A8I6Y4F2	>tr|A0A8I6Y4F2|A0A8I6Y4F2_HORVV TOG domain-containing protein OS=Hordeum vulgare subsp. vulgare OX=112509 PE=4 SV=1	0.5954	0.627141	0.754284	1.05331	0.128097
A0A8I6Y4H4	>tr|A0A8I6Y4H4|A0A8I6Y4H4_HORVV Calreticulin OS=Hordeum vulgare subsp. vulgare OX=112509 PE=3 SV=1	3.26581	2.46671	0.0792587	0.755314	-0.692098
A0A8I6Y4I6	>tr|A0A8I6Y4I6|A0A8I6Y4I6_HORVV Glutathione transferase OS=Hordeum vulgare subsp. vulgare OX=112509 PE=4 SV=1	0.543993	0.87963	0.304109	1.61699	1.18522
A0A8I6Y4J8	>tr|A0A8I6Y4J8|A0A8I6Y4J8_HORVV Glutamine synthetase OS=Hordeum vulgare subsp. vulgare OX=112509 PE=3 SV=1	2.03544	2.69127	0.151255	1.3222	0.68884
A0A8I6Y4M4	>tr|A0A8I6Y4M4|A0A8I6Y4M4_HORVV 2Fe-2S ferredoxin-type domain-containing protein OS=Hordeum vulgare subsp. vulgare OX=112509 PE=3 SV=1	0.651856	1.79597	0.323791	2.75517	2.49955
A0A8I6Y4R1	>tr|A0A8I6Y4R1|A0A8I6Y4R1_HORVV TPX2 C-terminal domain-containing protein OS=Hordeum vulgare subsp. vulgare OX=112509 PE=4 SV=1	1.08254	1.11381	0.572155	1.02888	0.0702181
A0A8I6Y4S2	>tr|A0A8I6Y4S2|A0A8I6Y4S2_HORVV RNA-binding protein Luc7-like 2 OS=Hordeum vulgare subsp. vulgare OX=112509 PE=3 SV=1	2.57639	2.45499	0.860116	0.952883	-0.119031
A0A8I6Y4W7	>tr|A0A8I6Y4W7|A0A8I6Y4W7_HORVV Alpha-galactosidase OS=Hordeum vulgare subsp. vulgare OX=112509 PE=3 SV=1	0.772326	0.750371	0.772649	0.971572	-0.0711281
A0A8I6Y4X2	>tr|A0A8I6Y4X2|A0A8I6Y4X2_HORVV Enhancer of mRNA-decapping protein 4 WD40 repeat region domain-containing protein OS=Hordeum vulgare subsp. vulgare OX=112509 PE=3 SV=1	2.99612	3.48079	0.577661	1.16177	0.369803
A0A8I6Y4Z6	>tr|A0A8I6Y4Z6|A0A8I6Y4Z6_HORVV Peptide-methionine (R)-S-oxide reductase OS=Hordeum vulgare subsp. vulgare OX=112509 PE=3 SV=1	2.26293	1.57966	0.0136369	0.69806	-0.886513
A0A8I6Y514	>tr|A0A8I6Y514|A0A8I6Y514_HORVV CCR4-NOT transcription complex subunit 1 OS=Hordeum vulgare subsp. vulgare OX=112509 PE=4 SV=1	0.477271	0.573472	0.607598	1.20157	0.452875
A0A8I6Y515	>tr|A0A8I6Y515|A0A8I6Y515_HORVV Cleavage and polyadenylation specificity factor subunit 3-I OS=Hordeum vulgare subsp. vulgare OX=112509 PE=4 SV=1	0.719903	0.63116	0.635922	0.876729	-0.32446
A0A8I6Y560	>tr|A0A8I6Y560|A0A8I6Y560_HORVV Heat shock 70 kDa protein, mitochondrial OS=Hordeum vulgare subsp. vulgare OX=112509 PE=3 SV=1	2.32202	1.95304	0.115532	0.841094	-0.426798
A0A8I6Y5B1	>tr|A0A8I6Y5B1|A0A8I6Y5B1_HORVV Replication protein A C-terminal domain-containing protein OS=Hordeum vulgare subsp. vulgare OX=112509 PE=3 SV=1	0.78542	0.53226	0.0693231	0.677676	-0.959604
A0A8I6Y5B4	>tr|A0A8I6Y5B4|A0A8I6Y5B4_HORVV RRM domain-containing protein OS=Hordeum vulgare subsp. vulgare OX=112509 PE=4 SV=1	2.09552	1.58984	0.0472248	0.758688	-0.681106
A0A8I6Y5C8	>tr|A0A8I6Y5C8|A0A8I6Y5C8_HORVV TATA-binding protein interacting (TIP20) domain-containing protein OS=Hordeum vulgare subsp. vulgare OX=112509 PE=3 SV=1	2.8057	2.33824	0.243492	0.833392	-0.449488
A0A8I6Y5D8	>tr|A0A8I6Y5D8|A0A8I6Y5D8_HORVV tuliposide A-converting enzyme OS=Hordeum vulgare subsp. vulgare OX=112509 PE=4 SV=1	0.912906	1.02433	0.221233	1.12205	0.284014
A0A8I6Y5H4	>tr|A0A8I6Y5H4|A0A8I6Y5H4_HORVV Legumain prodomain domain-containing protein OS=Hordeum vulgare subsp. vulgare OX=112509 PE=3 SV=1	0.403607	0.369917	0.803832	0.916526	-0.214974
A0A8I6Y5L4	>tr|A0A8I6Y5L4|A0A8I6Y5L4_HORVV phosphopyruvate hydratase OS=Hordeum vulgare subsp. vulgare OX=112509 PE=3 SV=1	0.896635	0.796475	0.679771	0.888294	-0.29214
A0A8I6Y5L5	>tr|A0A8I6Y5L5|A0A8I6Y5L5_HORVV Phytocyanin domain-containing protein OS=Hordeum vulgare subsp. vulgare OX=112509 PE=4 SV=1	0.594537	0.629654	0.627719	1.05907	0.141534
A0A8I6Y5M4	>tr|A0A8I6Y5M4|A0A8I6Y5M4_HORVV K Homology domain-containing protein OS=Hordeum vulgare subsp. vulgare OX=112509 PE=4 SV=1	1.9463	1.70532	0.525937	0.876185	-0.325991
A0A8I6Y5P6	>tr|A0A8I6Y5P6|A0A8I6Y5P6_HORVV DNA replication licensing factor MCM5 OS=Hordeum vulgare subsp. vulgare OX=112509 PE=3 SV=1	0.53928	0.986519	0.314907	1.82932	1.48952
A0A8I6Y5P8	>tr|A0A8I6Y5P8|A0A8I6Y5P8_HORVV Glutathione S-transferase OS=Hordeum vulgare subsp. vulgare OX=112509 PE=3 SV=1	0.586571	0.489513	0.439785	0.834533	-0.446112
A0A8I6Y5T6	>tr|A0A8I6Y5T6|A0A8I6Y5T6_HORVV Transmembrane 9 superfamily member OS=Hordeum vulgare subsp. vulgare OX=112509 PE=3 SV=1	1.52618	2.0065	0.65254	1.31472	0.674845
A0A8I6Y5V6	>tr|A0A8I6Y5V6|A0A8I6Y5V6_HORVV AAA+ ATPase domain-containing protein OS=Hordeum vulgare subsp. vulgare OX=112509 PE=3 SV=1	2.41484	2.25613	0.556382	0.93428	-0.167658
A0A8I6Y5W1	>tr|A0A8I6Y5W1|A0A8I6Y5W1_HORVV MOSC domain-containing protein OS=Hordeum vulgare subsp. vulgare OX=112509 PE=4 SV=1	0.524821	0.492061	0.642656	0.937579	-0.158964
A0A8I6Y5W3	>tr|A0A8I6Y5W3|A0A8I6Y5W3_HORVV AP-1 complex subunit gamma OS=Hordeum vulgare subsp. vulgare OX=112509 PE=3 SV=1	0.662973	0.52232	0.37431	0.787845	-0.5881
A0A8I6Y5W5	>tr|A0A8I6Y5W5|A0A8I6Y5W5_HORVV Peptidase A1 domain-containing protein OS=Hordeum vulgare subsp. vulgare OX=112509 PE=3 SV=1	2.04184	1.91078	0.537607	0.935811	-0.163619
A0A8I6Y5Z0	>tr|A0A8I6Y5Z0|A0A8I6Y5Z0_HORVV UBA domain-containing protein OS=Hordeum vulgare subsp. vulgare OX=112509 PE=3 SV=1	0.626244	0.564384	0.456422	0.901221	-0.256508
A0A8I6Y5Z6	>tr|A0A8I6Y5Z6|A0A8I6Y5Z6_HORVV MBD domain-containing protein OS=Hordeum vulgare subsp. vulgare OX=112509 PE=4 SV=1	16.283	15.4601	0.641576	0.949461	-0.127905
A0A8I6Y5Z8	>tr|A0A8I6Y5Z8|A0A8I6Y5Z8_HORVV Rho termination factor N-terminal domain-containing protein OS=Hordeum vulgare subsp. vulgare OX=112509 PE=4 SV=1	0.808453	0.310656	0.389687	0.38426	-2.35886
A0A8I6Y635	>tr|A0A8I6Y635|A0A8I6Y635_HORVV Ribosomal protein L37 OS=Hordeum vulgare subsp. vulgare OX=112509 PE=3 SV=1	1.05987	0.938854	0.470411	0.88582	-0.299018
A0A8I6Y657	>tr|A0A8I6Y657|A0A8I6Y657_HORVV anthocyanidin synthase OS=Hordeum vulgare subsp. vulgare OX=112509 PE=3 SV=1	0.818995	0.962965	0.530477	1.17579	0.399391
A0A8I6Y662	>tr|A0A8I6Y662|A0A8I6Y662_HORVV Importin N-terminal domain-containing protein OS=Hordeum vulgare subsp. vulgare OX=112509 PE=4 SV=1	0.834034	0.954703	0.793707	1.14468	0.333263
A0A8I6Y690	>tr|A0A8I6Y690|A0A8I6Y690_HORVV Mitochondrial uncoupling protein 1 OS=Hordeum vulgare subsp. vulgare OX=112509 PE=3 SV=1	0.915034	2.77071	0.0631561	3.02798	2.73241
A0A8I6Y697	>tr|A0A8I6Y697|A0A8I6Y697_HORVV Cns1/TTC4 wheel domain-containing protein OS=Hordeum vulgare subsp. vulgare OX=112509 PE=3 SV=1	0.42872	0.612725	0.134624	1.4292	0.880749
A0A8I6Y699	>tr|A0A8I6Y699|A0A8I6Y699_HORVV t-SNARE coiled-coil homology domain-containing protein OS=Hordeum vulgare subsp. vulgare OX=112509 PE=3 SV=1	2.94785	1.7882	0.207199	0.60661	-1.23283
A0A8I6Y6B9	>tr|A0A8I6Y6B9|A0A8I6Y6B9_HORVV AAA+ ATPase domain-containing protein OS=Hordeum vulgare subsp. vulgare OX=112509 PE=4 SV=1	0.640297	0.593422	0.828847	0.926791	-0.187506
A0A8I6Y6C0	>tr|A0A8I6Y6C0|A0A8I6Y6C0_HORVV dynamin GTPase OS=Hordeum vulgare subsp. vulgare OX=112509 PE=3 SV=1	2.78638	1.7276	0.35365	0.620016	-1.17892
A0A8I6Y6E8	>tr|A0A8I6Y6E8|A0A8I6Y6E8_HORVV Upstream activation factor subunit spp27 OS=Hordeum vulgare subsp. vulgare OX=112509 PE=4 SV=1	0.944378	0.908022	0.876388	0.961502	-0.096824
A0A8I6Y6F9	>tr|A0A8I6Y6F9|A0A8I6Y6F9_HORVV Riboflavin synthase OS=Hordeum vulgare subsp. vulgare OX=112509 PE=4 SV=1	0.543692	0.732036	0.366996	1.34642	0.733594
A0A8I6Y6G9	>tr|A0A8I6Y6G9|A0A8I6Y6G9_HORVV Protein CREG1 OS=Hordeum vulgare subsp. vulgare OX=112509 PE=4 SV=1	0.566936	0.500527	0.395861	0.882863	-0.307264
A0A8I6Y6H5	>tr|A0A8I6Y6H5|A0A8I6Y6H5_HORVV UspA domain-containing protein OS=Hordeum vulgare subsp. vulgare OX=112509 PE=4 SV=1	1.52328	2.31655	0.348234	1.52077	1.03392
A0A8I6Y6I1	>tr|A0A8I6Y6I1|A0A8I6Y6I1_HORVV histidinol-phosphate transaminase OS=Hordeum vulgare subsp. vulgare OX=112509 PE=3 SV=1	0.83998	0.86439	0.796423	1.02906	0.0706487
A0A8I6Y6J0	>tr|A0A8I6Y6J0|A0A8I6Y6J0_HORVV Pectinesterase OS=Hordeum vulgare subsp. vulgare OX=112509 PE=3 SV=1	1.18573	1.37428	0.135326	1.15901	0.363944
A0A8I6Y6L4	>tr|A0A8I6Y6L4|A0A8I6Y6L4_HORVV Acyl carrier protein OS=Hordeum vulgare subsp. vulgare OX=112509 PE=3 SV=1	0.865079	0.674969	0.292796	0.78024	-0.612023
A0A8I6Y6L6	>tr|A0A8I6Y6L6|A0A8I6Y6L6_HORVV Electron transfer flavoprotein subunit beta OS=Hordeum vulgare subsp. vulgare OX=112509 PE=3 SV=1	0.610215	0.868698	0.375702	1.42359	0.87106
A0A8I6Y6M3	>tr|A0A8I6Y6M3|A0A8I6Y6M3_HORVV Uncharacterized protein OS=Hordeum vulgare subsp. vulgare OX=112509 PE=4 SV=1	0.621503	0.60689	0.932648	0.976487	-0.0586817
A0A8I6Y6M4	>tr|A0A8I6Y6M4|A0A8I6Y6M4_HORVV Intron-binding protein aquarius OS=Hordeum vulgare subsp. vulgare OX=112509 PE=4 SV=1	1.0187	0.788434	0.12664	0.773957	-0.631964
A0A8I6Y6M7	>tr|A0A8I6Y6M7|A0A8I6Y6M7_HORVV t-SNARE coiled-coil homology domain-containing protein OS=Hordeum vulgare subsp. vulgare OX=112509 PE=3 SV=1	0.493873	0.679385	0.473675	1.37563	0.786527
A0A8I6Y6N4	>tr|A0A8I6Y6N4|A0A8I6Y6N4_HORVV Dipeptidyl peptidase IV OS=Hordeum vulgare subsp. vulgare OX=112509 PE=4 SV=1	0.68051	0.577102	0.235073	0.848044	-0.406504
A0A8I6Y6P1	>tr|A0A8I6Y6P1|A0A8I6Y6P1_HORVV Uncharacterized protein OS=Hordeum vulgare subsp. vulgare OX=112509 PE=4 SV=1	1.52255	1.28293	0.712537	0.842618	-0.422334
A0A8I6Y6R7	>tr|A0A8I6Y6R7|A0A8I6Y6R7_HORVV ZAC OS=Hordeum vulgare subsp. vulgare OX=112509 PE=4 SV=1	0.825013	1.76218	0.108529	2.13594	1.87169
A0A8I6Y6U9	>tr|A0A8I6Y6U9|A0A8I6Y6U9_HORVV YbaK/aminoacyl-tRNA synthetase-associated domain-containing protein OS=Hordeum vulgare subsp. vulgare OX=112509 PE=3 SV=1	2.4859	1.92181	0.385961	0.773084	-0.634746
A0A8I6Y6W0	>tr|A0A8I6Y6W0|A0A8I6Y6W0_HORVV ubiquitinyl hydrolase 1 OS=Hordeum vulgare subsp. vulgare OX=112509 PE=3 SV=1	0.706099	0.839494	0.71304	1.18892	0.426778
A0A8I6Y6X7	>tr|A0A8I6Y6X7|A0A8I6Y6X7_HORVV mannan endo-1,4-beta-mannosidase OS=Hordeum vulgare subsp. vulgare OX=112509 PE=3 SV=1	0.541151	0.610992	0.809849	1.12906	0.299373
A0A8I6Y6Y1	>tr|A0A8I6Y6Y1|A0A8I6Y6Y1_HORVV Acyl carrier protein OS=Hordeum vulgare subsp. vulgare OX=112509 PE=3 SV=1	2.27308	1.91782	0.703948	0.843711	-0.419137
A0A8I6Y6Y3	>tr|A0A8I6Y6Y3|A0A8I6Y6Y3_HORVV HECT-type E3 ubiquitin transferase OS=Hordeum vulgare subsp. vulgare OX=112509 PE=3 SV=1	3.09357	1.64839	0.608316	0.532845	-1.5526
A0A8I6Y6Y5	>tr|A0A8I6Y6Y5|A0A8I6Y6Y5_HORVV Uncharacterized protein OS=Hordeum vulgare subsp. vulgare OX=112509 PE=3 SV=1	9.99258	10.3419	0.435043	1.03495	0.0847344
A0A8I6Y6Z0	>tr|A0A8I6Y6Z0|A0A8I6Y6Z0_HORVV Uncharacterized protein OS=Hordeum vulgare subsp. vulgare OX=112509 PE=4 SV=1	0.391776	0.48324	0.0622398	1.23346	0.517484
A0A8I6Y706	>tr|A0A8I6Y706|A0A8I6Y706_HORVV EF-hand domain-containing protein OS=Hordeum vulgare subsp. vulgare OX=112509 PE=3 SV=1	0.529041	0.385043	0.245533	0.727812	-0.783574
A0A8I6Y713	>tr|A0A8I6Y713|A0A8I6Y713_HORVV NADP-dependent oxidoreductase domain-containing protein OS=Hordeum vulgare subsp. vulgare OX=112509 PE=4 SV=1	0.497282	0.512696	0.931143	1.031	0.0752892
A0A8I6Y721	>tr|A0A8I6Y721|A0A8I6Y721_HORVV Nicastrin OS=Hordeum vulgare subsp. vulgare OX=112509 PE=3 SV=1	0.869481	0.925502	0.74477	1.06443	0.153996
A0A8I6Y763	>tr|A0A8I6Y763|A0A8I6Y763_HORVV Uncharacterized protein OS=Hordeum vulgare subsp. vulgare OX=112509 PE=3 SV=1	0.733706	0.502859	0.2901	0.685369	-0.931765
A0A8I6Y7D8	>tr|A0A8I6Y7D8|A0A8I6Y7D8_HORVV Protein transport protein sec16 OS=Hordeum vulgare subsp. vulgare OX=112509 PE=3 SV=1	0.470899	0.322265	0.352088	0.684362	-0.935392
A0A8I6Y7H0	>tr|A0A8I6Y7H0|A0A8I6Y7H0_HORVV Uncharacterized protein OS=Hordeum vulgare subsp. vulgare OX=112509 PE=4 SV=1	4.78318	4.3368	0.79349	0.906678	-0.241618
A0A8I6Y7H5	>tr|A0A8I6Y7H5|A0A8I6Y7H5_HORVV Protein LURP-one-related 15 OS=Hordeum vulgare subsp. vulgare OX=112509 PE=3 SV=1	0.913189	0.909722	0.969919	0.996204	-0.00938103
A0A8I6Y7I8	>tr|A0A8I6Y7I8|A0A8I6Y7I8_HORVV Uncharacterized protein OS=Hordeum vulgare subsp. vulgare OX=112509 PE=4 SV=1	1.44456	1.361	0.558587	0.942155	-0.146955
A0A8I6Y7K8	>tr|A0A8I6Y7K8|A0A8I6Y7K8_HORVV non-reducing end alpha-L-arabinofuranosidase OS=Hordeum vulgare subsp. vulgare OX=112509 PE=3 SV=1	0.537645	0.454792	0.326606	0.845896	-0.412758
A0A8I6Y7M3	>tr|A0A8I6Y7M3|A0A8I6Y7M3_HORVV Alpha-mannosidase OS=Hordeum vulgare subsp. vulgare OX=112509 PE=3 SV=1	3.63839	2.99718	0.122195	0.823767	-0.478137
A0A8I6Y7N8	>tr|A0A8I6Y7N8|A0A8I6Y7N8_HORVV Tryptophan synthase beta chain-like PALP domain-containing protein OS=Hordeum vulgare subsp. vulgare OX=112509 PE=3 SV=1	0.424703	1.73943	0.468766	4.09565	3.4773
A0A8I6Y7Q2	>tr|A0A8I6Y7Q2|A0A8I6Y7Q2_HORVV Uncharacterized protein OS=Hordeum vulgare subsp. vulgare OX=112509 PE=3 SV=1	0.935718	0.894351	0.831872	0.955791	-0.111517
A0A8I6Y7R8	>tr|A0A8I6Y7R8|A0A8I6Y7R8_HORVV Non-specific lipid-transfer protein OS=Hordeum vulgare subsp. vulgare OX=112509 PE=3 SV=1	17.2434	41.0047	0.0588649	2.37799	2.13645
A0A8I6Y7U3	>tr|A0A8I6Y7U3|A0A8I6Y7U3_HORVV t-SNARE coiled-coil homology domain-containing protein OS=Hordeum vulgare subsp. vulgare OX=112509 PE=3 SV=1	1.15855	0.729214	0.518214	0.629421	-1.14179
A0A8I6Y7W3	>tr|A0A8I6Y7W3|A0A8I6Y7W3_HORVV Asparagine synthetase [glutamine-hydrolyzing] OS=Hordeum vulgare subsp. vulgare OX=112509 PE=4 SV=1	0.401929	0.854955	0.0795692	2.12713	1.8615
A0A8I6Y7Y1	>tr|A0A8I6Y7Y1|A0A8I6Y7Y1_HORVV Peptidase A1 domain-containing protein OS=Hordeum vulgare subsp. vulgare OX=112509 PE=3 SV=1	0.504562	1.24097	0.182568	2.45949	2.21956
A0A8I6Y7Y8	>tr|A0A8I6Y7Y8|A0A8I6Y7Y8_HORVV Uncharacterized protein OS=Hordeum vulgare subsp. vulgare OX=112509 PE=3 SV=1	3.44335	3.09487	0.309847	0.898795	-0.263156
A0A8I6Y812	>tr|A0A8I6Y812|A0A8I6Y812_HORVV Ribonucleoside-diphosphate reductase OS=Hordeum vulgare subsp. vulgare OX=112509 PE=3 SV=1	0.836723	1.03196	0.118242	1.23334	0.51725
A0A8I6Y835	>tr|A0A8I6Y835|A0A8I6Y835_HORVV BolA-like protein OS=Hordeum vulgare subsp. vulgare OX=112509 PE=3 SV=1	0.875304	0.718417	0.208726	0.820762	-0.487149
A0A8I6Y871	>tr|A0A8I6Y871|A0A8I6Y871_HORVV WIBG Mago-binding domain-containing protein OS=Hordeum vulgare subsp. vulgare OX=112509 PE=4 SV=1	1.55098	1.38682	0.474084	0.894157	-0.275916
A0A8I6Y879	>tr|A0A8I6Y879|A0A8I6Y879_HORVV transketolase OS=Hordeum vulgare subsp. vulgare OX=112509 PE=3 SV=1	1.45053	1.55619	0.828424	1.07285	0.173417
A0A8I6Y899	>tr|A0A8I6Y899|A0A8I6Y899_HORVV K Homology domain-containing protein OS=Hordeum vulgare subsp. vulgare OX=112509 PE=4 SV=1	0.652364	0.660687	0.909578	1.01276	0.0312647
A0A8I6Y8C3	>tr|A0A8I6Y8C3|A0A8I6Y8C3_HORVV PCI domain-containing protein OS=Hordeum vulgare subsp. vulgare OX=112509 PE=3 SV=1	2.60072	2.15954	0.303226	0.830361	-0.458473
A0A8I6Y8F7	>tr|A0A8I6Y8F7|A0A8I6Y8F7_HORVV Nucleoside diphosphate kinase OS=Hordeum vulgare subsp. vulgare OX=112509 PE=3 SV=1	1.00256	1.29707	0.192332	1.29376	0.635196
A0A8I6Y8G2	>tr|A0A8I6Y8G2|A0A8I6Y8G2_HORVV Senescence domain-containing protein OS=Hordeum vulgare subsp. vulgare OX=112509 PE=4 SV=1	1.41984	1.80861	0.437637	1.27381	0.596882
A0A8I6Y8G3	>tr|A0A8I6Y8G3|A0A8I6Y8G3_HORVV Golgi SNAP receptor complex member 1 OS=Hordeum vulgare subsp. vulgare OX=112509 PE=3 SV=1	0.577228	0.487871	0.44025	0.845197	-0.414795
A0A8I6Y8G7	>tr|A0A8I6Y8G7|A0A8I6Y8G7_HORVV ABC transporter domain-containing protein OS=Hordeum vulgare subsp. vulgare OX=112509 PE=4 SV=1	0.940573	1.20657	0.668237	1.2828	0.614222
A0A8I6Y8J1	>tr|A0A8I6Y8J1|A0A8I6Y8J1_HORVV DM2 domain-containing protein OS=Hordeum vulgare subsp. vulgare OX=112509 PE=4 SV=1	2.65826	2.2728	0.469343	0.854997	-0.386364
A0A8I6Y8J3	>tr|A0A8I6Y8J3|A0A8I6Y8J3_HORVV BRCT domain-containing protein OS=Hordeum vulgare subsp. vulgare OX=112509 PE=4 SV=1	0.558479	0.529513	0.809752	0.948135	-0.131353
A0A8I6Y8L9	>tr|A0A8I6Y8L9|A0A8I6Y8L9_HORVV RRM domain-containing protein OS=Hordeum vulgare subsp. vulgare OX=112509 PE=4 SV=1	3.684	2.7199	0.227841	0.738301	-0.748286
A0A8I6Y8P0	>tr|A0A8I6Y8P0|A0A8I6Y8P0_HORVV Glutamine synthetase OS=Hordeum vulgare subsp. vulgare OX=112509 PE=3 SV=1	0.68378	0.605473	0.59855	0.885478	-0.29997
A0A8I6Y8S1	>tr|A0A8I6Y8S1|A0A8I6Y8S1_HORVV Histone H2A OS=Hordeum vulgare subsp. vulgare OX=112509 PE=3 SV=1	0.875913	0.885147	0.903057	1.01054	0.0258648
A0A8I6Y8S6	>tr|A0A8I6Y8S6|A0A8I6Y8S6_HORVV Serine-threonine kinase receptor-associated protein OS=Hordeum vulgare subsp. vulgare OX=112509 PE=3 SV=1	1.32967	0.683397	0.170545	0.51396	-1.6416
A0A8I6Y8Y1	>tr|A0A8I6Y8Y1|A0A8I6Y8Y1_HORVV 3'(2'),5'-bisphosphate nucleotidase OS=Hordeum vulgare subsp. vulgare OX=112509 PE=3 SV=1	0.384322	0.441807	0.688077	1.14957	0.34378
A0A8I6Y8Y7	>tr|A0A8I6Y8Y7|A0A8I6Y8Y7_HORVV Deoxyhypusine hydroxylase OS=Hordeum vulgare subsp. vulgare OX=112509 PE=3 SV=1	0.437176	0.564527	0.699018	1.2913	0.630516
A0A8I6Y933	>tr|A0A8I6Y933|A0A8I6Y933_HORVV GOLD domain-containing protein OS=Hordeum vulgare subsp. vulgare OX=112509 PE=3 SV=1	1.13842	1.06025	0.579032	0.93133	-0.175456
A0A8I6Y961	>tr|A0A8I6Y961|A0A8I6Y961_HORVV Ubiquinone biosynthesis O-methyltransferase, mitochondrial OS=Hordeum vulgare subsp. vulgare OX=112509 GN=COQ3 PE=3 SV=1	0.700413	0.627871	0.490666	0.896431	-0.269651	COQ3
A0A8I6Y962	>tr|A0A8I6Y962|A0A8I6Y962_HORVV ADP-ribosylation factor-like protein 8B OS=Hordeum vulgare subsp. vulgare OX=112509 PE=3 SV=1	0.695513	0.612417	0.574505	0.880526	-0.313802
A0A8I6Y9A1	>tr|A0A8I6Y9A1|A0A8I6Y9A1_HORVV PSP proline-rich domain-containing protein OS=Hordeum vulgare subsp. vulgare OX=112509 PE=4 SV=1	0.482263	0.471631	0.960292	0.977953	-0.0549833
A0A8I6Y9A5	>tr|A0A8I6Y9A5|A0A8I6Y9A5_HORVV HTH La-type RNA-binding domain-containing protein OS=Hordeum vulgare subsp. vulgare OX=112509 PE=4 SV=1	0.506111	0.420146	0.669269	0.830146	-0.459113
A0A8I6Y9D8	>tr|A0A8I6Y9D8|A0A8I6Y9D8_HORVV PCI domain-containing protein OS=Hordeum vulgare subsp. vulgare OX=112509 PE=3 SV=1	3.19977	2.75345	0.293617	0.860514	-0.370501
A0A8I6Y9F9	>tr|A0A8I6Y9F9|A0A8I6Y9F9_HORVV C3H1-type domain-containing protein OS=Hordeum vulgare subsp. vulgare OX=112509 PE=4 SV=1	1.39318	3.82656	0.175173	2.74664	2.4919
A0A8I6Y9I1	>tr|A0A8I6Y9I1|A0A8I6Y9I1_HORVV oligopeptidase A OS=Hordeum vulgare subsp. vulgare OX=112509 PE=3 SV=1	7.36342	5.86074	0.114352	0.795926	-0.562933
A0A8I6Y9J7	>tr|A0A8I6Y9J7|A0A8I6Y9J7_HORVV RNA polymerase Rpb4/RPC9 core domain-containing protein OS=Hordeum vulgare subsp. vulgare OX=112509 PE=3 SV=1	0.782032	0.66446	0.354294	0.849658	-0.401813
A0A8I6Y9K9	>tr|A0A8I6Y9K9|A0A8I6Y9K9_HORVV Phosphoserine aminotransferase OS=Hordeum vulgare subsp. vulgare OX=112509 PE=3 SV=1	1.58534	1.58643	0.998603	1.00069	0.00168941
A0A8I6Y9L9	>tr|A0A8I6Y9L9|A0A8I6Y9L9_HORVV Cdk-activating kinase assembly factor MAT1 centre domain-containing protein OS=Hordeum vulgare subsp. vulgare OX=112509 PE=4 SV=1	1.08642	0.609381	0.137726	0.560908	-1.42601
A0A8I6Y9P4	>tr|A0A8I6Y9P4|A0A8I6Y9P4_HORVV Single-stranded DNA binding protein Ssb-like OB fold domain-containing protein OS=Hordeum vulgare subsp. vulgare OX=112509 PE=4 SV=1	0.617739	0.951152	0.193084	1.53973	1.06448
A0A8I6Y9U7	>tr|A0A8I6Y9U7|A0A8I6Y9U7_HORVV phosphoribosylaminoimidazolesuccinocarboxamide synthase OS=Hordeum vulgare subsp. vulgare OX=112509 PE=3 SV=1	1.08633	1.11355	0.879108	1.02506	0.0610419
A0A8I6Y9U8	>tr|A0A8I6Y9U8|A0A8I6Y9U8_HORVV Uncharacterized protein OS=Hordeum vulgare subsp. vulgare OX=112509 PE=3 SV=1	0.457743	0.523742	0.604081	1.14418	0.332192
A0A8I6Y9X5	>tr|A0A8I6Y9X5|A0A8I6Y9X5_HORVV ATPase inhibitor OS=Hordeum vulgare subsp. vulgare OX=112509 PE=3 SV=1	1.80862	1.23752	0.0694765	0.684233	-0.935857
A0A8I6Y9Z6	>tr|A0A8I6Y9Z6|A0A8I6Y9Z6_HORVV Uncharacterized protein OS=Hordeum vulgare subsp. vulgare OX=112509 PE=4 SV=1	1.6557	1.31726	0.126354	0.79559	-0.563972
A0A8I6YA06	>tr|A0A8I6YA06|A0A8I6YA06_HORVV 6-phosphogluconate dehydrogenase, decarboxylating OS=Hordeum vulgare subsp. vulgare OX=112509 PE=3 SV=1	6.02856	5.48579	0.654707	0.909966	-0.23269
A0A8I6YA10	>tr|A0A8I6YA10|A0A8I6YA10_HORVV Afadin-and alpha-actinin-binding protein OS=Hordeum vulgare subsp. vulgare OX=112509 PE=3 SV=1	0.837095	0.536201	0.326063	0.64055	-1.09856
A0A8I6YA15	>tr|A0A8I6YA15|A0A8I6YA15_HORVV RRM domain-containing protein OS=Hordeum vulgare subsp. vulgare OX=112509 PE=4 SV=1	4.24414	3.41228	0.425458	0.803997	-0.538047
A0A8I6YA55	>tr|A0A8I6YA55|A0A8I6YA55_HORVV RuBisCO large subunit-binding protein subunit beta, chloroplastic OS=Hordeum vulgare subsp. vulgare OX=112509 PE=3 SV=1	4.57746	4.31213	0.900951	0.942036	-0.147268
A0A8I6YA60	>tr|A0A8I6YA60|A0A8I6YA60_HORVV Tetratricopeptide repeat protein 38 OS=Hordeum vulgare subsp. vulgare OX=112509 PE=3 SV=1	0.401805	0.36822	0.816307	0.916414	-0.215276
A0A8I6YA81	>tr|A0A8I6YA81|A0A8I6YA81_HORVV Proton pump-interactor 1 OS=Hordeum vulgare subsp. vulgare OX=112509 PE=4 SV=1	3.6856	2.65411	0.0122427	0.720129	-0.809748
A0A8I6YAG1	>tr|A0A8I6YAG1|A0A8I6YAG1_HORVV phosphoribosylamine--glycine ligase OS=Hordeum vulgare subsp. vulgare OX=112509 PE=3 SV=1	4.54869	5.67852	0.184979	1.24839	0.547155
A0A8I6YAH9	>tr|A0A8I6YAH9|A0A8I6YAH9_HORVV Dynamin-related protein 1C OS=Hordeum vulgare subsp. vulgare OX=112509 PE=3 SV=1	0.620786	0.692746	0.831741	1.11592	0.270497
A0A8I6YAI6	>tr|A0A8I6YAI6|A0A8I6YAI6_HORVV GOLD domain-containing protein OS=Hordeum vulgare subsp. vulgare OX=112509 PE=3 SV=1	0.777533	0.7138	0.282291	0.918033	-0.210924
A0A8I6YAJ5	>tr|A0A8I6YAJ5|A0A8I6YAJ5_HORVV UDP-glucose 6-dehydrogenase OS=Hordeum vulgare subsp. vulgare OX=112509 PE=3 SV=1	4.50087	4.39424	0.882349	0.976309	-0.0591324
A0A8I6YAJ6	>tr|A0A8I6YAJ6|A0A8I6YAJ6_HORVV Cold responsive protein OS=Hordeum vulgare subsp. vulgare OX=112509 PE=4 SV=1	1.08577	1.39143	0.633473	1.28151	0.611735
A0A8I6YAP5	>tr|A0A8I6YAP5|A0A8I6YAP5_HORVV Calcium-binding EF hand family protein OS=Hordeum vulgare subsp. vulgare OX=112509 PE=4 SV=1	1.39011	1.20876	0.727008	0.869542	-0.344762
A0A8I6YAQ9	>tr|A0A8I6YAQ9|A0A8I6YAQ9_HORVV AMP-activated protein kinase glycogen-binding domain-containing protein OS=Hordeum vulgare subsp. vulgare OX=112509 PE=4 SV=1	0.730682	0.832134	0.52232	1.13885	0.320657
A0A8I6YAT8	>tr|A0A8I6YAT8|A0A8I6YAT8_HORVV Alkaline/neutral invertase OS=Hordeum vulgare subsp. vulgare OX=112509 PE=3 SV=1	0.642861	0.655652	0.89568	1.0199	0.048593
A0A8I6YAV0	>tr|A0A8I6YAV0|A0A8I6YAV0_HORVV GDP-mannose 4,6-dehydratase OS=Hordeum vulgare subsp. vulgare OX=112509 PE=3 SV=1	0.769037	0.521707	0.359634	0.67839	-0.957008
A0A8I6YAY5	>tr|A0A8I6YAY5|A0A8I6YAY5_HORVV SCP domain-containing protein OS=Hordeum vulgare subsp. vulgare OX=112509 PE=4 SV=1	1.1404	0.951541	0.448156	0.834393	-0.446527
A0A8I6YB06	>tr|A0A8I6YB06|A0A8I6YB06_HORVV Coatomer subunit beta' OS=Hordeum vulgare subsp. vulgare OX=112509 PE=3 SV=1	2.21707	2.29363	0.937351	1.03453	0.0837254
A0A8I6YB13	>tr|A0A8I6YB13|A0A8I6YB13_HORVV HIG1 domain-containing protein OS=Hordeum vulgare subsp. vulgare OX=112509 PE=4 SV=1	1.8468	1.05745	0.411723	0.572583	-1.37521
A0A8I6YB14	>tr|A0A8I6YB14|A0A8I6YB14_HORVV NEDD8-activating enzyme E1 regulatory subunit OS=Hordeum vulgare subsp. vulgare OX=112509 PE=3 SV=1	0.700008	0.816266	0.0189385	1.16608	0.378942
A0A8I6YB72	>tr|A0A8I6YB72|A0A8I6YB72_HORVV Puromycin-sensitive aminopeptidase OS=Hordeum vulgare subsp. vulgare OX=112509 PE=3 SV=1	1.95013	1.75325	0.536289	0.899041	-0.262481
A0A8I6YB73	>tr|A0A8I6YB73|A0A8I6YB73_HORVV Endoplasmic reticulum oxidoreductin-1 OS=Hordeum vulgare subsp. vulgare OX=112509 PE=3 SV=1	3.1533	2.91904	0.859153	0.925709	-0.190387
A0A8I6YB84	>tr|A0A8I6YB84|A0A8I6YB84_HORVV methylcrotonoyl-CoA carboxylase OS=Hordeum vulgare subsp. vulgare OX=112509 PE=4 SV=1	1.02028	1.00329	0.896615	0.983351	-0.0414073
A0A8I6YB85	>tr|A0A8I6YB85|A0A8I6YB85_HORVV Glutaredoxin domain-containing protein OS=Hordeum vulgare subsp. vulgare OX=112509 PE=3 SV=1	1.22502	1.81933	0.171776	1.48514	0.975449
A0A8I6YBH6	>tr|A0A8I6YBH6|A0A8I6YBH6_HORVV FCA protein OS=Hordeum vulgare subsp. vulgare OX=112509 PE=4 SV=1	1.88112	1.28954	0.15375	0.685514	-0.931242
A0A8I6YBJ3	>tr|A0A8I6YBJ3|A0A8I6YBJ3_HORVV AB hydrolase-1 domain-containing protein OS=Hordeum vulgare subsp. vulgare OX=112509 PE=4 SV=1	9.35775	10.3818	0.42697	1.10943	0.256123
A0A8I6YBK2	>tr|A0A8I6YBK2|A0A8I6YBK2_HORVV T-complex protein 1 subunit eta OS=Hordeum vulgare subsp. vulgare OX=112509 PE=3 SV=1	2.80621	2.14631	0.263105	0.764844	-0.661175
A0A8I6YBK7	>tr|A0A8I6YBK7|A0A8I6YBK7_HORVV Uncharacterized protein OS=Hordeum vulgare subsp. vulgare OX=112509 PE=4 SV=1	0.592257	0.50093	0.486271	0.845798	-0.413042
A0A8I6YBQ4	>tr|A0A8I6YBQ4|A0A8I6YBQ4_HORVV NAD(P)H-hydrate epimerase OS=Hordeum vulgare subsp. vulgare OX=112509 PE=3 SV=1	0.560469	0.415187	0.133349	0.740785	-0.740001
A0A8I6YBR3	>tr|A0A8I6YBR3|A0A8I6YBR3_HORVV Uncharacterized protein OS=Hordeum vulgare subsp. vulgare OX=112509 PE=4 SV=1	0.421297	0.329594	0.549343	0.782333	-0.605416
A0A8I6YBV0	>tr|A0A8I6YBV0|A0A8I6YBV0_HORVV NAD-dependent epimerase/dehydratase domain-containing protein OS=Hordeum vulgare subsp. vulgare OX=112509 PE=4 SV=1	2.24574	1.52985	0.71612	0.681225	-0.946723
A0A8I6YBY7	>tr|A0A8I6YBY7|A0A8I6YBY7_HORVV Vacuolar import/degradation Vid27 C-terminal domain-containing protein OS=Hordeum vulgare subsp. vulgare OX=112509 PE=4 SV=1	0.786115	0.571469	0.389002	0.726954	-0.786486
A0A8I6YC10	>tr|A0A8I6YC10|A0A8I6YC10_HORVV Peroxin-3 OS=Hordeum vulgare subsp. vulgare OX=112509 PE=4 SV=1	0.714705	1.20312	0.241343	1.68338	1.28446
A0A8I6YC32	>tr|A0A8I6YC32|A0A8I6YC32_HORVV phosphopyruvate hydratase OS=Hordeum vulgare subsp. vulgare OX=112509 PE=3 SV=1	1.29708	1.03775	0.317108	0.800066	-0.550136
A0A8I6YC52	>tr|A0A8I6YC52|A0A8I6YC52_HORVV Glucose-1-phosphate adenylyltransferase OS=Hordeum vulgare subsp. vulgare OX=112509 PE=3 SV=1	4.22616	4.29642	0.939093	1.01663	0.0406654
A0A8I6YC55	>tr|A0A8I6YC55|A0A8I6YC55_HORVV Uncharacterized protein OS=Hordeum vulgare subsp. vulgare OX=112509 PE=4 SV=1	0.992692	1.35607	0.357215	1.36605	0.7693
A0A8I6YC75	>tr|A0A8I6YC75|A0A8I6YC75_HORVV AP-1 complex subunit gamma OS=Hordeum vulgare subsp. vulgare OX=112509 PE=3 SV=1	1.4847	1.30216	0.276815	0.877053	-0.323549
A0A8I6YC81	>tr|A0A8I6YC81|A0A8I6YC81_HORVV sulfate adenylyltransferase OS=Hordeum vulgare subsp. vulgare OX=112509 PE=4 SV=1	1.35145	1.19031	0.750935	0.880767	-0.313126
A0A8I6YC85	>tr|A0A8I6YC85|A0A8I6YC85_HORVV ZAC OS=Hordeum vulgare subsp. vulgare OX=112509 PE=4 SV=1	0.794663	0.765774	0.75434	0.963646	-0.0913309
A0A8I6YCE4	>tr|A0A8I6YCE4|A0A8I6YCE4_HORVV Thioredoxin domain-containing protein OS=Hordeum vulgare subsp. vulgare OX=112509 PE=3 SV=1	0.753271	0.48889	0.432104	0.649022	-1.06616
A0A8I6YCK0	>tr|A0A8I6YCK0|A0A8I6YCK0_HORVV Bifunctional inhibitor/plant lipid transfer protein/seed storage helical domain-containing protein OS=Hordeum vulgare subsp. vulgare OX=112509 PE=3 SV=1	25.9892	17.7625	0.220934	0.683458	-0.938649
A0A8I6YCK7	>tr|A0A8I6YCK7|A0A8I6YCK7_HORVV STI1/HOP DP domain-containing protein OS=Hordeum vulgare subsp. vulgare OX=112509 PE=4 SV=1	6.72249	5.40332	0.217386	0.803769	-0.538749
A0A8I6YCM3	>tr|A0A8I6YCM3|A0A8I6YCM3_HORVV Uncharacterized protein OS=Hordeum vulgare subsp. vulgare OX=112509 PE=3 SV=1	3.06506	2.99465	0.862973	0.977031	-0.0573104
A0A8I6YCN4	>tr|A0A8I6YCN4|A0A8I6YCN4_HORVV BZIP domain-containing protein OS=Hordeum vulgare subsp. vulgare OX=112509 PE=4 SV=1	4.53135	5.02591	0.848077	1.10914	0.255476
A0A8I6YCQ1	>tr|A0A8I6YCQ1|A0A8I6YCQ1_HORVV Kinesin motor domain-containing protein OS=Hordeum vulgare subsp. vulgare OX=112509 PE=3 SV=1	0.687409	0.554696	0.159231	0.806936	-0.529048
A0A8I6YCQ7	>tr|A0A8I6YCQ7|A0A8I6YCQ7_HORVV GRAM domain-containing protein OS=Hordeum vulgare subsp. vulgare OX=112509 PE=3 SV=1	0.692194	1.26088	0.248862	1.82157	1.47904
A0A8I6YCQ8	>tr|A0A8I6YCQ8|A0A8I6YCQ8_HORVV Ufm1-specific protease OS=Hordeum vulgare subsp. vulgare OX=112509 PE=3 SV=1	1.82696	2.10164	0.497692	1.15035	0.345443
A0A8I6YCS6	>tr|A0A8I6YCS6|A0A8I6YCS6_HORVV Serine/threonine-protein phosphatase 2A activator OS=Hordeum vulgare subsp. vulgare OX=112509 PE=3 SV=1	0.563308	0.480452	0.611752	0.852911	-0.392388
A0A8I6YCT4	>tr|A0A8I6YCT4|A0A8I6YCT4_HORVV Inosine-5'-monophosphate dehydrogenase OS=Hordeum vulgare subsp. vulgare OX=112509 PE=3 SV=1	2.30834	1.84319	0.563144	0.798491	-0.554996
A0A8I6YCT7	>tr|A0A8I6YCT7|A0A8I6YCT7_HORVV TOM1-like protein 2 OS=Hordeum vulgare subsp. vulgare OX=112509 PE=3 SV=1	0.658728	0.650235	0.961522	0.987106	-0.0320071
A0A8I6YCY0	>tr|A0A8I6YCY0|A0A8I6YCY0_HORVV RRM domain-containing protein OS=Hordeum vulgare subsp. vulgare OX=112509 PE=4 SV=1	2.49817	2.84412	0.369808	1.13848	0.319865
A0A8I6YCZ5	>tr|A0A8I6YCZ5|A0A8I6YCZ5_HORVV WAT1-related protein OS=Hordeum vulgare subsp. vulgare OX=112509 PE=3 SV=1	0.584987	0.340201	0.200714	0.581552	-1.33687
A0A8I6YD16	>tr|A0A8I6YD16|A0A8I6YD16_HORVV Methylcrotonoyl-CoA carboxylase subunit alpha, mitochondrial OS=Hordeum vulgare subsp. vulgare OX=112509 PE=4 SV=1	1.20161	1.16168	0.763319	0.966774	-0.0833382
A0A8I6YD73	>tr|A0A8I6YD73|A0A8I6YD73_HORVV Uncharacterized protein OS=Hordeum vulgare subsp. vulgare OX=112509 PE=4 SV=1	0.654678	0.666848	0.724676	1.01859	0.0454231
A0A8I6YD95	>tr|A0A8I6YD95|A0A8I6YD95_HORVV Thioredoxin domain-containing protein OS=Hordeum vulgare subsp. vulgare OX=112509 PE=4 SV=1	2.40602	1.99061	0.493676	0.827345	-0.467446
A0A8I6YDA0	>tr|A0A8I6YDA0|A0A8I6YDA0_HORVV Serine carboxypeptidase-like 19 OS=Hordeum vulgare subsp. vulgare OX=112509 PE=3 SV=1	0.323017	0.333982	0.941463	1.03395	0.0823331
A0A8I6YDA6	>tr|A0A8I6YDA6|A0A8I6YDA6_HORVV LIM zinc-binding domain-containing protein OS=Hordeum vulgare subsp. vulgare OX=112509 PE=4 SV=1	0.503243	0.760812	0.293698	1.51182	1.01936
A0A8I6YDC1	>tr|A0A8I6YDC1|A0A8I6YDC1_HORVV Carbohydrate kinase PfkB domain-containing protein OS=Hordeum vulgare subsp. vulgare OX=112509 PE=3 SV=1	0.590539	0.491202	0.416967	0.831786	-0.454245
A0A8I6YDC5	>tr|A0A8I6YDC5|A0A8I6YDC5_HORVV Transmembrane protein OS=Hordeum vulgare subsp. vulgare OX=112509 PE=4 SV=1	0.604647	0.63987	0.871689	1.05825	0.139644
A0A8I6YDF9	>tr|A0A8I6YDF9|A0A8I6YDF9_HORVV Peptidase M48 domain-containing protein OS=Hordeum vulgare subsp. vulgare OX=112509 PE=4 SV=1	0.627408	0.537651	0.661754	0.85694	-0.380765
A0A8I6YDH6	>tr|A0A8I6YDH6|A0A8I6YDH6_HORVV Uncharacterized protein OS=Hordeum vulgare subsp. vulgare OX=112509 PE=4 SV=1	0.790073	0.70426	0.516729	0.891387	-0.283568
A0A8I6YDH9	>tr|A0A8I6YDH9|A0A8I6YDH9_HORVV Squalene synthase OS=Hordeum vulgare subsp. vulgare OX=112509 PE=3 SV=1	0.423669	0.387124	0.732693	0.913742	-0.222479
A0A8I6YDM5	>tr|A0A8I6YDM5|A0A8I6YDM5_HORVV Proteasome subunit beta OS=Hordeum vulgare subsp. vulgare OX=112509 PE=3 SV=1	2.63878	2.11664	0.31873	0.802129	-0.543786
A0A8I6YDM6	>tr|A0A8I6YDM6|A0A8I6YDM6_HORVV SHSP domain-containing protein OS=Hordeum vulgare subsp. vulgare OX=112509 PE=3 SV=1	8.37231	6.93342	0.482251	0.828137	-0.465087
A0A8I6YDN6	>tr|A0A8I6YDN6|A0A8I6YDN6_HORVV Nucleoside diphosphate kinase OS=Hordeum vulgare subsp. vulgare OX=112509 PE=3 SV=1	9.11875	7.32851	0.467682	0.803675	-0.539037
A0A8I6YDP8	>tr|A0A8I6YDP8|A0A8I6YDP8_HORVV 5-oxoprolinase OS=Hordeum vulgare subsp. vulgare OX=112509 PE=3 SV=1	0.653824	0.696467	0.670073	1.06522	0.155825
A0A8I6YDQ5	>tr|A0A8I6YDQ5|A0A8I6YDQ5_HORVV Nucleoprotein TPR/MLP1 domain-containing protein OS=Hordeum vulgare subsp. vulgare OX=112509 PE=4 SV=1	6.4191	6.4006	0.995807	0.997117	-0.00712013
A0A8I6YDQ8	>tr|A0A8I6YDQ8|A0A8I6YDQ8_HORVV L-ascorbate oxidase OS=Hordeum vulgare subsp. vulgare OX=112509 PE=3 SV=1	0.567999	0.582742	0.939664	1.02596	0.0632004
A0A8I6YDR0	>tr|A0A8I6YDR0|A0A8I6YDR0_HORVV Nuclear pore protein OS=Hordeum vulgare subsp. vulgare OX=112509 PE=3 SV=1	0.629128	0.583876	0.744552	0.928071	-0.184102
A0A8I6YDS2	>tr|A0A8I6YDS2|A0A8I6YDS2_HORVV Pyruvate dehydrogenase E1 component subunit alpha OS=Hordeum vulgare subsp. vulgare OX=112509 PE=4 SV=1	1.22151	1.28605	0.913565	1.05284	0.126991
A0A8I6YDS4	>tr|A0A8I6YDS4|A0A8I6YDS4_HORVV Uncharacterized protein OS=Hordeum vulgare subsp. vulgare OX=112509 PE=4 SV=1	1.06736	1.15906	0.888381	1.08591	0.203278
A0A8I6YDV3	>tr|A0A8I6YDV3|A0A8I6YDV3_HORVV MSP domain-containing protein OS=Hordeum vulgare subsp. vulgare OX=112509 PE=3 SV=1	0.436837	0.283092	0.0823454	0.648049	-1.06985
A0A8I6YDX1	>tr|A0A8I6YDX1|A0A8I6YDX1_HORVV Alpha-amylase OS=Hordeum vulgare subsp. vulgare OX=112509 PE=3 SV=1	1.70424	3.92753	0.383929	2.30456	2.0591
A0A8I6YDY9	>tr|A0A8I6YDY9|A0A8I6YDY9_HORVV rRNA N-glycosylase OS=Hordeum vulgare subsp. vulgare OX=112509 PE=3 SV=1	18.8375	19.7776	0.746129	1.04991	0.120119
A0A8I6YE02	>tr|A0A8I6YE02|A0A8I6YE02_HORVV Uncharacterized protein OS=Hordeum vulgare subsp. vulgare OX=112509 PE=3 SV=1	0.544921	0.771671	0.456625	1.41611	0.858068
A0A8I6YE07	>tr|A0A8I6YE07|A0A8I6YE07_HORVV ADF-H domain-containing protein OS=Hordeum vulgare subsp. vulgare OX=112509 PE=3 SV=1	1.30933	1.72511	0.49017	1.31755	0.680145
A0A8I6YE25	>tr|A0A8I6YE25|A0A8I6YE25_HORVV Oleosin OS=Hordeum vulgare subsp. vulgare OX=112509 PE=3 SV=1	17.0126	13.5003	0.402485	0.79355	-0.570305
A0A8I6YE31	>tr|A0A8I6YE31|A0A8I6YE31_HORVV Peptidase A1 domain-containing protein OS=Hordeum vulgare subsp. vulgare OX=112509 PE=3 SV=1	0.504514	0.45485	0.657471	0.901561	-0.255576
A0A8I6YE56	>tr|A0A8I6YE56|A0A8I6YE56_HORVV Tryptophan synthase OS=Hordeum vulgare subsp. vulgare OX=112509 PE=3 SV=1	1.20484	1.38378	0.765305	1.14851	0.341506
A0A8I6YE65	>tr|A0A8I6YE65|A0A8I6YE65_HORVV Probable bifunctional methylthioribulose-1-phosphate dehydratase/enolase-phosphatase E1 OS=Hordeum vulgare subsp. vulgare OX=112509 PE=3 SV=1	0.738229	0.448428	0.309098	0.607437	-1.22947
A0A8I6YE78	>tr|A0A8I6YE78|A0A8I6YE78_HORVV Uncharacterized protein OS=Hordeum vulgare subsp. vulgare OX=112509 PE=4 SV=1	1.54064	1.07797	0.469062	0.699693	-0.88075
A0A8I6YE87	>tr|A0A8I6YE87|A0A8I6YE87_HORVV Late embryogenesis abundant protein LEA-2 subgroup domain-containing protein OS=Hordeum vulgare subsp. vulgare OX=112509 PE=4 SV=1	0.599474	0.561408	0.392261	0.9365	-0.161803
A0A8I6YEA1	>tr|A0A8I6YEA1|A0A8I6YEA1_HORVV FAD-binding PCMH-type domain-containing protein OS=Hordeum vulgare subsp. vulgare OX=112509 PE=3 SV=1	0.670762	0.575443	0.0488942	0.857893	-0.378024
A0A8I6YEH6	>tr|A0A8I6YEH6|A0A8I6YEH6_HORVV Peroxin-5 OS=Hordeum vulgare subsp. vulgare OX=112509 PE=3 SV=1	1.1507	0.331328	0.0371565	0.287936	-3.07059
A0A8I6YEJ4	>tr|A0A8I6YEJ4|A0A8I6YEJ4_HORVV Tr-type G domain-containing protein OS=Hordeum vulgare subsp. vulgare OX=112509 PE=4 SV=1	1.00536	1.16868	0.637799	1.16245	0.371243
A0A8I6YEN6	>tr|A0A8I6YEN6|A0A8I6YEN6_HORVV DSBA-like thioredoxin domain-containing protein OS=Hordeum vulgare subsp. vulgare OX=112509 PE=4 SV=1	3.58058	3.00727	0.19026	0.839884	-0.43035
A0A8I6YEN8	>tr|A0A8I6YEN8|A0A8I6YEN8_HORVV L-ascorbate peroxidase OS=Hordeum vulgare subsp. vulgare OX=112509 PE=3 SV=1	3.32491	2.78926	0.132233	0.838897	-0.433248
A0A8I6YEY5	>tr|A0A8I6YEY5|A0A8I6YEY5_HORVV WD repeat-containing protein DWA2 OS=Hordeum vulgare subsp. vulgare OX=112509 PE=3 SV=1	0.757841	0.459633	0.0625487	0.606503	-1.23326
A0A8I6YEZ5	>tr|A0A8I6YEZ5|A0A8I6YEZ5_HORVV NTF2 domain-containing protein OS=Hordeum vulgare subsp. vulgare OX=112509 PE=4 SV=1	7.53834	7.29837	0.888868	0.968167	-0.0797866
A0A8I6YF06	>tr|A0A8I6YF06|A0A8I6YF06_HORVV Nudix hydrolase domain-containing protein OS=Hordeum vulgare subsp. vulgare OX=112509 PE=3 SV=1	0.923175	0.845247	0.566888	0.915587	-0.217502
A0A8I6YF21	>tr|A0A8I6YF21|A0A8I6YF21_HORVV Peptidyl-prolyl cis-trans isomerase OS=Hordeum vulgare subsp. vulgare OX=112509 PE=3 SV=1	2.46493	2.69532	0.858693	1.09347	0.220374
A0A8I6YF24	>tr|A0A8I6YF24|A0A8I6YF24_HORVV Uncharacterized protein OS=Hordeum vulgare subsp. vulgare OX=112509 PE=3 SV=1	1.63522	1.24987	0.435836	0.764344	-0.662788
A0A8I6YF32	>tr|A0A8I6YF32|A0A8I6YF32_HORVV Carboxypeptidase OS=Hordeum vulgare subsp. vulgare OX=112509 PE=3 SV=1	2.12325	1.89675	0.77531	0.893324	-0.278215
A0A8I6YF41	>tr|A0A8I6YF41|A0A8I6YF41_HORVV Clathrin heavy chain OS=Hordeum vulgare subsp. vulgare OX=112509 PE=3 SV=1	2.52081	2.29494	0.725335	0.910396	-0.231527
A0A8I6YF47	>tr|A0A8I6YF47|A0A8I6YF47_HORVV HTH La-type RNA-binding domain-containing protein OS=Hordeum vulgare subsp. vulgare OX=112509 PE=4 SV=1	0.693085	0.48195	0.307407	0.695369	-0.89604
A0A8I6YF87	>tr|A0A8I6YF87|A0A8I6YF87_HORVV Fibronectin type III-like domain-containing protein OS=Hordeum vulgare subsp. vulgare OX=112509 PE=4 SV=1	0.657277	0.973583	0.303091	1.48124	0.968956
A0A8I6YFB9	>tr|A0A8I6YFB9|A0A8I6YFB9_HORVV EGF-like calcium-binding domain-containing protein OS=Hordeum vulgare subsp. vulgare OX=112509 PE=3 SV=1	0.904082	1.08699	0.256678	1.20232	0.454419
A0A8I6YFE3	>tr|A0A8I6YFE3|A0A8I6YFE3_HORVV UspA domain-containing protein OS=Hordeum vulgare subsp. vulgare OX=112509 PE=4 SV=1	0.562643	0.433132	0.436362	0.769817	-0.64519
A0A8I6YFF0	>tr|A0A8I6YFF0|A0A8I6YFF0_HORVV E1 ubiquitin-activating enzyme OS=Hordeum vulgare subsp. vulgare OX=112509 PE=3 SV=1	1.72626	1.71725	0.98656	0.994782	-0.0129037
A0A8I6YFF4	>tr|A0A8I6YFF4|A0A8I6YFF4_HORVV ABC transporter domain-containing protein OS=Hordeum vulgare subsp. vulgare OX=112509 PE=4 SV=1	2.06265	1.67407	0.650513	0.811613	-0.514796
A0A8I6YFL0	>tr|A0A8I6YFL0|A0A8I6YFL0_HORVV Prephenate/arogenate dehydrogenase domain-containing protein OS=Hordeum vulgare subsp. vulgare OX=112509 PE=4 SV=1	0.813806	0.698122	0.268543	0.857848	-0.378155
A0A8I6YFN2	>tr|A0A8I6YFN2|A0A8I6YFN2_HORVV Dihydrolipoamide acetyltransferase component of pyruvate dehydrogenase complex OS=Hordeum vulgare subsp. vulgare OX=112509 PE=3 SV=1	0.857166	0.896344	0.91675	1.04571	0.110226
A0A8I6YFR3	>tr|A0A8I6YFR3|A0A8I6YFR3_HORVV THO complex subunit 5B OS=Hordeum vulgare subsp. vulgare OX=112509 PE=3 SV=1	0.489055	0.576465	0.545714	1.17873	0.405558
A0A8I6YFT4	>tr|A0A8I6YFT4|A0A8I6YFT4_HORVV PA domain-containing protein OS=Hordeum vulgare subsp. vulgare OX=112509 PE=3 SV=1	0.63895	0.508226	0.434361	0.795408	-0.564537
A0A8I6YFW7	>tr|A0A8I6YFW7|A0A8I6YFW7_HORVV Enoyl-[acyl-carrier-protein] reductase (NADH) OS=Hordeum vulgare subsp. vulgare OX=112509 PE=3 SV=1	3.63379	4.10387	0.151337	1.12936	0.300033
A0A8I6YG19	>tr|A0A8I6YG19|A0A8I6YG19_HORVV adenylate kinase OS=Hordeum vulgare subsp. vulgare OX=112509 PE=3 SV=1	2.04568	2.83214	0.455343	1.38445	0.802295
A0A8I6YG23	>tr|A0A8I6YG23|A0A8I6YG23_HORVV Anaphase-promoting complex subunit 4 WD40 domain-containing protein OS=Hordeum vulgare subsp. vulgare OX=112509 PE=4 SV=1	4.03586	5.08383	0.729826	1.25967	0.569338
A0A8I6YG31	>tr|A0A8I6YG31|A0A8I6YG31_HORVV Trehalose 6-phosphate phosphatase OS=Hordeum vulgare subsp. vulgare OX=112509 PE=3 SV=1	0.948418	0.942886	0.934787	0.994167	-0.0144274
A0A8I6YG90	>tr|A0A8I6YG90|A0A8I6YG90_HORVV Proton pump-interactor 1 OS=Hordeum vulgare subsp. vulgare OX=112509 PE=3 SV=1	7.83154	6.25994	0.13687	0.799324	-0.552425
A0A8I6YGD1	>tr|A0A8I6YGD1|A0A8I6YGD1_HORVV CobW C-terminal domain-containing protein OS=Hordeum vulgare subsp. vulgare OX=112509 PE=3 SV=1	0.560926	0.37859	0.184075	0.674937	-0.969592
A0A8I6YGD4	>tr|A0A8I6YGD4|A0A8I6YGD4_HORVV ACB domain-containing protein OS=Hordeum vulgare subsp. vulgare OX=112509 PE=3 SV=1	10.5481	8.58835	0.40496	0.814209	-0.506918
A0A8I6YGD6	>tr|A0A8I6YGD6|A0A8I6YGD6_HORVV Uncharacterized protein OS=Hordeum vulgare subsp. vulgare OX=112509 PE=4 SV=1	1.15667	0.695992	0.206541	0.601721	-1.25279
A0A8I6YGE1	>tr|A0A8I6YGE1|A0A8I6YGE1_HORVV DUF3456 domain-containing protein OS=Hordeum vulgare subsp. vulgare OX=112509 PE=3 SV=1	1.16929	0.930989	0.219066	0.796198	-0.562089
A0A8I6YGF9	>tr|A0A8I6YGF9|A0A8I6YGF9_HORVV EF-hand domain-containing protein OS=Hordeum vulgare subsp. vulgare OX=112509 PE=4 SV=1	1.48904	0.366797	0.00759558	0.24633	-3.45549
A0A8I6YGI7	>tr|A0A8I6YGI7|A0A8I6YGI7_HORVV 4-coumarate--CoA ligase OS=Hordeum vulgare subsp. vulgare OX=112509 PE=3 SV=1	0.36626	0.563014	0.269826	1.5372	1.06041
A0A8I6YGK8	>tr|A0A8I6YGK8|A0A8I6YGK8_HORVV GST C-terminal domain-containing protein OS=Hordeum vulgare subsp. vulgare OX=112509 PE=4 SV=1	1.40744	1.54921	0.74553	1.10072	0.236688
A0A8I6YGL9	>tr|A0A8I6YGL9|A0A8I6YGL9_HORVV MIF4G domain-containing protein OS=Hordeum vulgare subsp. vulgare OX=112509 PE=3 SV=1	0.87846	0.977285	0.807765	1.1125	0.262927
A0A8I6YGM4	>tr|A0A8I6YGM4|A0A8I6YGM4_HORVV CENP-V/GFA domain-containing protein OS=Hordeum vulgare subsp. vulgare OX=112509 PE=3 SV=1	0.561438	0.494956	0.633922	0.881585	-0.310837
A0A8I6YGT2	>tr|A0A8I6YGT2|A0A8I6YGT2_HORVV U-box domain-containing protein OS=Hordeum vulgare subsp. vulgare OX=112509 PE=3 SV=1	3.00954	1.18954	0.0739871	0.395257	-2.28927
A0A8I6YGT9	>tr|A0A8I6YGT9|A0A8I6YGT9_HORVV Thioredoxin domain-containing protein OS=Hordeum vulgare subsp. vulgare OX=112509 PE=4 SV=1	1.36051	1.13553	0.380623	0.834637	-0.445805
A0A8I6YGU3	>tr|A0A8I6YGU3|A0A8I6YGU3_HORVV NAC domain-containing protein OS=Hordeum vulgare subsp. vulgare OX=112509 PE=4 SV=1	0.530132	0.424458	0.331239	0.800666	-0.548289
A0A8I6YGW7	>tr|A0A8I6YGW7|A0A8I6YGW7_HORVV NADP-dependent oxidoreductase domain-containing protein OS=Hordeum vulgare subsp. vulgare OX=112509 PE=4 SV=1	1.7651	2.46347	0.0242163	1.39565	0.822168
A0A8I6YGY2	>tr|A0A8I6YGY2|A0A8I6YGY2_HORVV rRNA 2'-O-methyltransferase fibrillarin OS=Hordeum vulgare subsp. vulgare OX=112509 PE=3 SV=1	2.56449	2.0459	0.722992	0.797782	-0.557187
A0A8I6YGZ0	>tr|A0A8I6YGZ0|A0A8I6YGZ0_HORVV RRM domain-containing protein OS=Hordeum vulgare subsp. vulgare OX=112509 PE=4 SV=1	3.55529	3.11989	0.147282	0.877534	-0.322198
A0A8I6YH05	>tr|A0A8I6YH05|A0A8I6YH05_HORVV NADH dehydrogenase [ubiquinone] 1 beta subcomplex subunit 9 OS=Hordeum vulgare subsp. vulgare OX=112509 PE=3 SV=1	5.95023	5.62556	0.624599	0.945437	-0.13838
A0A8I6YH11	>tr|A0A8I6YH11|A0A8I6YH11_HORVV Uncharacterized protein OS=Hordeum vulgare subsp. vulgare OX=112509 PE=3 SV=1	0.967416	0.538385	0.0412407	0.556519	-1.44539
A0A8I6YH43	>tr|A0A8I6YH43|A0A8I6YH43_HORVV Leucine carboxyl methyltransferase 1 homolog OS=Hordeum vulgare subsp. vulgare OX=112509 PE=3 SV=1	0.548113	0.564536	0.846296	1.02996	0.0728148
A0A8I6YH53	>tr|A0A8I6YH53|A0A8I6YH53_HORVV FAD-binding PCMH-type domain-containing protein OS=Hordeum vulgare subsp. vulgare OX=112509 PE=3 SV=1	0.958862	1.10077	0.220806	1.14799	0.340387
A0A8I6YHA5	>tr|A0A8I6YHA5|A0A8I6YHA5_HORVV Bet v I/Major latex protein domain-containing protein OS=Hordeum vulgare subsp. vulgare OX=112509 PE=3 SV=1	2.0288	2.17966	0.838461	1.07436	0.176889
A0A8I6YHB0	>tr|A0A8I6YHB0|A0A8I6YHB0_HORVV Transducin/WD40 repeat-like superfamily protein OS=Hordeum vulgare subsp. vulgare OX=112509 PE=4 SV=1	0.465089	0.488252	0.952158	1.0498	0.119866
A0A8I6YHC8	>tr|A0A8I6YHC8|A0A8I6YHC8_HORVV Glutaredoxin-dependent peroxiredoxin OS=Hordeum vulgare subsp. vulgare OX=112509 PE=3 SV=1	6.83828	6.98522	0.845075	1.02149	0.0524329
A0A8I6YHE1	>tr|A0A8I6YHE1|A0A8I6YHE1_HORVV Uncharacterized protein OS=Hordeum vulgare subsp. vulgare OX=112509 PE=4 SV=1	2.27761	1.38813	0.14209	0.609469	-1.22123
A0A8I6YHI9	>tr|A0A8I6YHI9|A0A8I6YHI9_HORVV Arogenate dehydratase OS=Hordeum vulgare subsp. vulgare OX=112509 PE=4 SV=1	0.625917	0.530652	0.353092	0.8478	-0.407213
A0A8I6YHJ3	>tr|A0A8I6YHJ3|A0A8I6YHJ3_HORVV Peroxidase OS=Hordeum vulgare subsp. vulgare OX=112509 PE=3 SV=1	0.970172	0.94429	0.924044	0.973321	-0.0666911
A0A8I6YHM8	>tr|A0A8I6YHM8|A0A8I6YHM8_HORVV Nudix hydrolase domain-containing protein OS=Hordeum vulgare subsp. vulgare OX=112509 PE=4 SV=1	0.834992	0.756578	0.289628	0.90609	-0.243218
A0A8I6YHP1	>tr|A0A8I6YHP1|A0A8I6YHP1_HORVV RRM domain-containing protein OS=Hordeum vulgare subsp. vulgare OX=112509 PE=4 SV=1	0.785088	0.624451	0.260636	0.795391	-0.56459
A0A8I6YHP8	>tr|A0A8I6YHP8|A0A8I6YHP8_HORVV RRM domain-containing protein OS=Hordeum vulgare subsp. vulgare OX=112509 PE=4 SV=1	1.92141	1.82523	0.484892	0.949946	-0.126644
A0A8I6YHR4	>tr|A0A8I6YHR4|A0A8I6YHR4_HORVV 1,3-beta-glucan synthase OS=Hordeum vulgare subsp. vulgare OX=112509 PE=3 SV=1	0.920128	0.646835	0.33415	0.702983	-0.869179
A0A8I6YHR5	>tr|A0A8I6YHR5|A0A8I6YHR5_HORVV VOC domain-containing protein OS=Hordeum vulgare subsp. vulgare OX=112509 PE=3 SV=1	10.0774	9.7782	0.722506	0.970309	-0.0743363
A0A8I6YHR6	>tr|A0A8I6YHR6|A0A8I6YHR6_HORVV Uncharacterized protein OS=Hordeum vulgare subsp. vulgare OX=112509 PE=4 SV=1	0.928992	0.747195	0.581259	0.804307	-0.537099
A0A8I6YHS0	>tr|A0A8I6YHS0|A0A8I6YHS0_HORVV Hordoindoline-a OS=Hordeum vulgare subsp. vulgare OX=112509 PE=4 SV=1	0.43339	0.369437	0.608155	0.852436	-0.393762
A0A8I6YHX7	>tr|A0A8I6YHX7|A0A8I6YHX7_HORVV Maternal effect embryo arrest 59 OS=Hordeum vulgare subsp. vulgare OX=112509 PE=4 SV=1	2.43891	2.59798	0.898901	1.06522	0.155823
A0A8I6YHY9	>tr|A0A8I6YHY9|A0A8I6YHY9_HORVV Uncharacterized protein OS=Hordeum vulgare subsp. vulgare OX=112509 PE=4 SV=1	3.58325	4.14951	0.485323	1.15803	0.361854
A0A8I6YHZ7	>tr|A0A8I6YHZ7|A0A8I6YHZ7_HORVV Ubiquitin-like modifier-activating enzyme 5 OS=Hordeum vulgare subsp. vulgare OX=112509 PE=3 SV=1	1.46743	1.94377	0.0983868	1.32461	0.693317
A0A8I6YI46	>tr|A0A8I6YI46|A0A8I6YI46_HORVV Uridine kinase OS=Hordeum vulgare subsp. vulgare OX=112509 PE=3 SV=1	0.618438	0.713663	0.099776	1.15398	0.353206
A0A8I6YI51	>tr|A0A8I6YI51|A0A8I6YI51_HORVV Peroxidase OS=Hordeum vulgare subsp. vulgare OX=112509 PE=3 SV=1	1.12675	2.15876	0.240252	1.91591	1.60357
A0A8I6YIE8	>tr|A0A8I6YIE8|A0A8I6YIE8_HORVV Glyceraldehyde-3-phosphate dehydrogenase OS=Hordeum vulgare subsp. vulgare OX=112509 PE=3 SV=1	1.98505	2.22633	0.721166	1.12155	0.28291
A0A8I6YIG1	>tr|A0A8I6YIG1|A0A8I6YIG1_HORVV chitinase OS=Hordeum vulgare subsp. vulgare OX=112509 PE=4 SV=1	6.65271	7.22931	0.234626	1.08667	0.204997
A0A8I6YIH2	>tr|A0A8I6YIH2|A0A8I6YIH2_HORVV UBC core domain-containing protein OS=Hordeum vulgare subsp. vulgare OX=112509 PE=3 SV=1	1.22923	1.14921	0.15631	0.934899	-0.166023
A0A8I6YIK6	>tr|A0A8I6YIK6|A0A8I6YIK6_HORVV UBX domain-containing protein OS=Hordeum vulgare subsp. vulgare OX=112509 PE=4 SV=1	0.98671	0.520087	0.186513	0.527092	-1.57937
A0A8I6YIK8	>tr|A0A8I6YIK8|A0A8I6YIK8_HORVV Probable cytosolic iron-sulfur protein assembly protein CIAO1 homolog OS=Hordeum vulgare subsp. vulgare OX=112509 PE=3 SV=1	0.742765	0.657399	0.388521	0.885071	-0.301106
A0A8I6YIL2	>tr|A0A8I6YIL2|A0A8I6YIL2_HORVV UDP-glucose 4-epimerase OS=Hordeum vulgare subsp. vulgare OX=112509 PE=3 SV=1	1.19073	1.24715	0.892874	1.04738	0.114168
A0A8I6YIL8	>tr|A0A8I6YIL8|A0A8I6YIL8_HORVV Probable 6-phosphogluconolactonase OS=Hordeum vulgare subsp. vulgare OX=112509 PE=3 SV=1	2.02854	1.71515	0.0626428	0.84551	-0.413883
A0A8I6YIP0	>tr|A0A8I6YIP0|A0A8I6YIP0_HORVV DUF642 domain-containing protein OS=Hordeum vulgare subsp. vulgare OX=112509 PE=4 SV=1	1.38984	2.35685	0.595623	1.69577	1.30255
A0A8I6YIP4	>tr|A0A8I6YIP4|A0A8I6YIP4_HORVV Activating signal cointegrator 1 complex subunit 3 OS=Hordeum vulgare subsp. vulgare OX=112509 PE=4 SV=1	0.606091	0.731203	0.680836	1.20642	0.462828
A0A8I6YIR4	>tr|A0A8I6YIR4|A0A8I6YIR4_HORVV alpha-glucosidase OS=Hordeum vulgare subsp. vulgare OX=112509 PE=3 SV=1	0.656111	0.363272	0.0874114	0.553675	-1.45802
A0A8I6YIU1	>tr|A0A8I6YIU1|A0A8I6YIU1_HORVV Proteasome subunit alpha type OS=Hordeum vulgare subsp. vulgare OX=112509 PE=3 SV=1	1.88157	2.36714	0.0674576	1.25807	0.566211
A0A8I6YIV5	>tr|A0A8I6YIV5|A0A8I6YIV5_HORVV MOB kinase activator-like 1A OS=Hordeum vulgare subsp. vulgare OX=112509 PE=3 SV=1	1.65427	1.44472	0.131842	0.873326	-0.334053
A0A8I6YIW6	>tr|A0A8I6YIW6|A0A8I6YIW6_HORVV NADH dehydrogenase [ubiquinone] 1 alpha subcomplex subunit 12 OS=Hordeum vulgare subsp. vulgare OX=112509 PE=3 SV=1	0.759995	0.646806	0.709162	0.851066	-0.397731
A0A8I6YIY6	>tr|A0A8I6YIY6|A0A8I6YIY6_HORVV BRISC and BRCA1-A complex member 1 OS=Hordeum vulgare subsp. vulgare OX=112509 PE=4 SV=1	0.778335	0.652507	0.535156	0.838337	-0.434895
A0A8I6YJ10	>tr|A0A8I6YJ10|A0A8I6YJ10_HORVV Peroxidase OS=Hordeum vulgare subsp. vulgare OX=112509 PE=3 SV=1	1.0549	1.48252	0.341272	1.40536	0.839275
A0A8I6YJ27	>tr|A0A8I6YJ27|A0A8I6YJ27_HORVV FAS1 domain-containing protein OS=Hordeum vulgare subsp. vulgare OX=112509 PE=3 SV=1	0.661431	0.508228	0.106931	0.768376	-0.649812
A0A8I6YJB7	>tr|A0A8I6YJB7|A0A8I6YJB7_HORVV BTB domain-containing protein OS=Hordeum vulgare subsp. vulgare OX=112509 PE=4 SV=1	1.23979	1.55527	0.508251	1.25447	0.559135
A0A8I6YJB9	>tr|A0A8I6YJB9|A0A8I6YJB9_HORVV U1 small nuclear ribonucleoprotein C OS=Hordeum vulgare subsp. vulgare OX=112509 PE=3 SV=1	0.603498	0.382545	0.289592	0.633879	-1.12438
A0A8I6YJC8	>tr|A0A8I6YJC8|A0A8I6YJC8_HORVV Reticulon-like protein OS=Hordeum vulgare subsp. vulgare OX=112509 PE=4 SV=1	1.60351	1.23252	0.310501	0.76864	-0.648964
A0A8I6YJD5	>tr|A0A8I6YJD5|A0A8I6YJD5_HORVV Cystathionine beta-lyase OS=Hordeum vulgare subsp. vulgare OX=112509 PE=3 SV=1	1.07471	0.855561	0.379938	0.796086	-0.562435
A0A8I6YJE7	>tr|A0A8I6YJE7|A0A8I6YJE7_HORVV RRM domain-containing protein OS=Hordeum vulgare subsp. vulgare OX=112509 PE=4 SV=1	0.824594	0.65358	0.21223	0.792608	-0.573236
A0A8I6YJI3	>tr|A0A8I6YJI3|A0A8I6YJI3_HORVV Peptidase A1 domain-containing protein OS=Hordeum vulgare subsp. vulgare OX=112509 PE=3 SV=1	0.938929	0.872271	0.865279	0.929007	-0.181617
A0A8I6YJQ6	>tr|A0A8I6YJQ6|A0A8I6YJQ6_HORVV Protein kinase domain-containing protein OS=Hordeum vulgare subsp. vulgare OX=112509 PE=4 SV=1	0.499671	0.704989	0.25646	1.41091	0.848982
A0A8I6YJS1	>tr|A0A8I6YJS1|A0A8I6YJS1_HORVV Bidirectional sugar transporter SWEET OS=Hordeum vulgare subsp. vulgare OX=112509 PE=3 SV=1	0.415243	0.357464	0.522715	0.860857	-0.36952
A0A8I6YJT8	>tr|A0A8I6YJT8|A0A8I6YJT8_HORVV RNA-binding protein Luc7-like 2 OS=Hordeum vulgare subsp. vulgare OX=112509 PE=3 SV=1	0.672125	0.462842	0.251078	0.688625	-0.920077
A0A8I6YJX5	>tr|A0A8I6YJX5|A0A8I6YJX5_HORVV mitogen-activated protein kinase kinase OS=Hordeum vulgare subsp. vulgare OX=112509 PE=3 SV=1	0.526157	0.499594	0.571803	0.949515	-0.127765
A0A8I6YJY1	>tr|A0A8I6YJY1|A0A8I6YJY1_HORVV Tetraspanin OS=Hordeum vulgare subsp. vulgare OX=112509 PE=3 SV=1	1.29146	0.940128	0.124944	0.727958	-0.783079
A0A8I6YJY3	>tr|A0A8I6YJY3|A0A8I6YJY3_HORVV AAA+ ATPase domain-containing protein OS=Hordeum vulgare subsp. vulgare OX=112509 PE=3 SV=1	0.571531	0.419639	0.396776	0.734237	-0.7619
A0A8I6YJY4	>tr|A0A8I6YJY4|A0A8I6YJY4_HORVV Uncharacterized protein OS=Hordeum vulgare subsp. vulgare OX=112509 PE=4 SV=1	1.24135	1.49774	0.361726	1.20654	0.463062
A0A8I6YJZ6	>tr|A0A8I6YJZ6|A0A8I6YJZ6_HORVV Carbonic anhydrase OS=Hordeum vulgare subsp. vulgare OX=112509 PE=3 SV=1	0.967822	1.75538	0.483445	1.81374	1.46842
A0A8I6YK17	>tr|A0A8I6YK17|A0A8I6YK17_HORVV 3-oxoacyl-[acyl-carrier-protein] synthase OS=Hordeum vulgare subsp. vulgare OX=112509 PE=3 SV=1	0.806306	1.16084	0.0675195	1.4397	0.898808
A0A8I6YK18	>tr|A0A8I6YK18|A0A8I6YK18_HORVV Uncharacterized protein OS=Hordeum vulgare subsp. vulgare OX=112509 PE=4 SV=1	0.719494	0.722355	0.986862	1.00398	0.00978574
A0A8I6YK25	>tr|A0A8I6YK25|A0A8I6YK25_HORVV Aldose 1-epimerase OS=Hordeum vulgare subsp. vulgare OX=112509 PE=3 SV=1	3.59821	3.01489	0.596095	0.837885	-0.436225
A0A8I6YK63	>tr|A0A8I6YK63|A0A8I6YK63_HORVV Uncharacterized protein OS=Hordeum vulgare subsp. vulgare OX=112509 PE=4 SV=1	1.59402	1.08804	0.289891	0.682577	-0.941833
A0A8I6YK70	>tr|A0A8I6YK70|A0A8I6YK70_HORVV Aspartic proteinase OS=Hordeum vulgare subsp. vulgare OX=112509 PE=3 SV=1	0.598087	0.518226	0.416084	0.866472	-0.353485
A0A8I6YKD5	>tr|A0A8I6YKD5|A0A8I6YKD5_HORVV STI1 domain-containing protein OS=Hordeum vulgare subsp. vulgare OX=112509 PE=4 SV=1	1.74768	1.35062	0.064361	0.772805	-0.635636
A0A8I6YKF2	>tr|A0A8I6YKF2|A0A8I6YKF2_HORVV Tetratricopeptide repeat protein 1 OS=Hordeum vulgare subsp. vulgare OX=112509 PE=4 SV=1	2.33385	2.0053	0.646789	0.859225	-0.3742
A0A8I6YKH0	>tr|A0A8I6YKH0|A0A8I6YKH0_HORVV Bifunctional inhibitor/plant lipid transfer protein/seed storage helical domain-containing protein OS=Hordeum vulgare subsp. vulgare OX=112509 PE=3 SV=1	8.9305	7.04975	0.611587	0.789401	-0.583233
A0A8I6YKJ4	>tr|A0A8I6YKJ4|A0A8I6YKJ4_HORVV Germin-like protein OS=Hordeum vulgare subsp. vulgare OX=112509 PE=3 SV=1	0.725321	0.654949	0.438347	0.902979	-0.251702
A0A8I6YKK6	>tr|A0A8I6YKK6|A0A8I6YKK6_HORVV NADH dehydrogenase [ubiquinone] 1 beta subcomplex subunit 7 OS=Hordeum vulgare subsp. vulgare OX=112509 PE=3 SV=1	3.39292	2.49285	0.300019	0.73472	-0.760276
A0A8I6YKP7	>tr|A0A8I6YKP7|A0A8I6YKP7_HORVV Aldehyde oxidase OS=Hordeum vulgare subsp. vulgare OX=112509 PE=3 SV=1	0.825053	0.781756	0.787084	0.947522	-0.132947
A0A8I6YKQ7	>tr|A0A8I6YKQ7|A0A8I6YKQ7_HORVV LIM zinc-binding domain-containing protein OS=Hordeum vulgare subsp. vulgare OX=112509 PE=4 SV=1	2.67829	2.91245	0.832258	1.08743	0.206716
A0A8I6YKR1	>tr|A0A8I6YKR1|A0A8I6YKR1_HORVV tryptophan synthase OS=Hordeum vulgare subsp. vulgare OX=112509 PE=3 SV=1	0.82262	0.755166	0.625049	0.918001	-0.211009
A0A8I6YKV1	>tr|A0A8I6YKV1|A0A8I6YKV1_HORVV dynamin GTPase OS=Hordeum vulgare subsp. vulgare OX=112509 PE=3 SV=1	0.791723	1.04359	0.417645	1.31813	0.681222
A0A8I6YKW2	>tr|A0A8I6YKW2|A0A8I6YKW2_HORVV RRM domain-containing protein OS=Hordeum vulgare subsp. vulgare OX=112509 PE=4 SV=1	0.563682	0.491407	0.623495	0.87178	-0.338423
A0A8I6YKZ9	>tr|A0A8I6YKZ9|A0A8I6YKZ9_HORVV Lysine--tRNA ligase OS=Hordeum vulgare subsp. vulgare OX=112509 PE=3 SV=1	1.90558	1.33761	0.0742676	0.701942	-0.872836
A0A8I6YL06	>tr|A0A8I6YL06|A0A8I6YL06_HORVV H15 domain-containing protein OS=Hordeum vulgare subsp. vulgare OX=112509 PE=3 SV=1	1.57411	1.12493	0.223693	0.714645	-0.828602
A0A8I6YL35	>tr|A0A8I6YL35|A0A8I6YL35_HORVV Terpene synthase N-terminal domain-containing protein OS=Hordeum vulgare subsp. vulgare OX=112509 PE=4 SV=1	1.01206	1.04783	0.791978	1.03534	0.085664
A0A8I6YL42	>tr|A0A8I6YL42|A0A8I6YL42_HORVV Uncharacterized protein OS=Hordeum vulgare subsp. vulgare OX=112509 PE=4 SV=1	0.896691	0.599433	0.163789	0.668495	-0.993246
A0A8I6YL87	>tr|A0A8I6YL87|A0A8I6YL87_HORVV EF-hand domain-containing protein OS=Hordeum vulgare subsp. vulgare OX=112509 PE=4 SV=1	2.9462	3.02919	0.885154	1.02817	0.0685059
A0A8I6YLC5	>tr|A0A8I6YLC5|A0A8I6YLC5_HORVV ATP synthase subunit O, mitochondrial OS=Hordeum vulgare subsp. vulgare OX=112509 PE=3 SV=1	3.54175	4.21903	0.0956917	1.19123	0.431567
A0A8I6YLC9	>tr|A0A8I6YLC9|A0A8I6YLC9_HORVV Enhancer of mRNA-decapping protein 4 WD40 repeat region domain-containing protein OS=Hordeum vulgare subsp. vulgare OX=112509 PE=3 SV=1	1.97821	1.70683	0.11326	0.862814	-0.363919
A0A8I6YLD4	>tr|A0A8I6YLD4|A0A8I6YLD4_HORVV Rab-GAP TBC domain-containing protein OS=Hordeum vulgare subsp. vulgare OX=112509 PE=4 SV=1	0.44933	0.780994	0.353087	1.73813	1.3634
A0A8I6YLG7	>tr|A0A8I6YLG7|A0A8I6YLG7_HORVV UspA domain-containing protein OS=Hordeum vulgare subsp. vulgare OX=112509 PE=4 SV=1	0.893792	1.62858	0.0834603	1.8221	1.47976
A0A8I6YLH5	>tr|A0A8I6YLH5|A0A8I6YLH5_HORVV Damage-control phosphatase ARMT1-like metal-binding domain-containing protein OS=Hordeum vulgare subsp. vulgare OX=112509 PE=4 SV=1	1.20059	1.27148	0.776864	1.05905	0.141492
A0A8I6YLI5	>tr|A0A8I6YLI5|A0A8I6YLI5_HORVV Uncharacterized protein OS=Hordeum vulgare subsp. vulgare OX=112509 PE=4 SV=1	0.61769	0.617593	0.999044	0.999844	-0.000383954
A0A8I6YLK1	>tr|A0A8I6YLK1|A0A8I6YLK1_HORVV Carbohydrate kinase PfkB domain-containing protein OS=Hordeum vulgare subsp. vulgare OX=112509 PE=3 SV=1	0.414285	0.477265	0.469238	1.15202	0.349024
A0A8I6YLL1	>tr|A0A8I6YLL1|A0A8I6YLL1_HORVV Alpha-mannosidase OS=Hordeum vulgare subsp. vulgare OX=112509 PE=3 SV=1	0.675468	0.634201	0.69477	0.938906	-0.155474
A0A8I6YLR3	>tr|A0A8I6YLR3|A0A8I6YLR3_HORVV Protein FLC EXPRESSOR OS=Hordeum vulgare subsp. vulgare OX=112509 PE=3 SV=1	0.941781	1.22931	0.31034	1.3053	0.657102
A0A8I6YLT8	>tr|A0A8I6YLT8|A0A8I6YLT8_HORVV RRM domain-containing protein OS=Hordeum vulgare subsp. vulgare OX=112509 PE=4 SV=1	0.938638	1.03732	0.501104	1.10513	0.246544
A0A8I6YLU2	>tr|A0A8I6YLU2|A0A8I6YLU2_HORVV Protein kinase domain-containing protein OS=Hordeum vulgare subsp. vulgare OX=112509 PE=3 SV=1	0.44882	0.668313	0.37977	1.48904	0.981919
A0A8I6YLU5	>tr|A0A8I6YLU5|A0A8I6YLU5_HORVV Charged multivesicular body protein 3 OS=Hordeum vulgare subsp. vulgare OX=112509 PE=4 SV=1	3.62482	3.17539	0.311687	0.876013	-0.326476
A0A8I6YLV6	>tr|A0A8I6YLV6|A0A8I6YLV6_HORVV Succinate dehydrogenase [ubiquinone] flavoprotein subunit, mitochondrial OS=Hordeum vulgare subsp. vulgare OX=112509 PE=3 SV=1	4.38747	3.68288	0.4943	0.839407	-0.431749
A0A8I6YLV8	>tr|A0A8I6YLV8|A0A8I6YLV8_HORVV L-threonate dehydrogenase OS=Hordeum vulgare subsp. vulgare OX=112509 PE=3 SV=1	0.733256	1.70292	0.222354	2.32241	2.07813
A0A8I6YLW7	>tr|A0A8I6YLW7|A0A8I6YLW7_HORVV Heat shock cognate 70 kDa protein OS=Hordeum vulgare subsp. vulgare OX=112509 PE=3 SV=1	3.84201	3.97177	0.784474	1.03377	0.0819221
A0A8I6YLX1	>tr|A0A8I6YLX1|A0A8I6YLX1_HORVV Citrate synthase OS=Hordeum vulgare subsp. vulgare OX=112509 PE=3 SV=1	2.20084	2.11646	0.93551	0.961659	-0.0964214
A0A8I6YLZ4	>tr|A0A8I6YLZ4|A0A8I6YLZ4_HORVV Glycosyl hydrolase family 13 catalytic domain-containing protein OS=Hordeum vulgare subsp. vulgare OX=112509 PE=4 SV=1	0.864483	0.794295	0.63541	0.918809	-0.208839
A0A8I6YM04	>tr|A0A8I6YM04|A0A8I6YM04_HORVV RRM domain-containing protein OS=Hordeum vulgare subsp. vulgare OX=112509 PE=4 SV=1	0.50919	0.555945	0.577891	1.09182	0.216662
A0A8I6YM13	>tr|A0A8I6YM13|A0A8I6YM13_HORVV Importin N-terminal domain-containing protein OS=Hordeum vulgare subsp. vulgare OX=112509 PE=4 SV=1	0.549997	0.465671	0.502286	0.84668	-0.410473
A0A8I6YM43	>tr|A0A8I6YM43|A0A8I6YM43_HORVV MD-2-related lipid-recognition domain-containing protein OS=Hordeum vulgare subsp. vulgare OX=112509 PE=3 SV=1	0.548322	0.432167	0.352193	0.788162	-0.587107
A0A8I6YM51	>tr|A0A8I6YM51|A0A8I6YM51_HORVV Glycosyltransferase OS=Hordeum vulgare subsp. vulgare OX=112509 PE=3 SV=1	0.639533	0.569974	0.116003	0.891234	-0.28399
A0A8I6YMC3	>tr|A0A8I6YMC3|A0A8I6YMC3_HORVV AB hydrolase-1 domain-containing protein OS=Hordeum vulgare subsp. vulgare OX=112509 PE=4 SV=1	2.79251	3.11429	0.718077	1.11523	0.268975
A0A8I6YMC7	>tr|A0A8I6YMC7|A0A8I6YMC7_HORVV DUF3700 domain-containing protein OS=Hordeum vulgare subsp. vulgare OX=112509 PE=4 SV=1	4.90838	5.36182	0.690699	1.09238	0.217922
A0A8I6YME5	>tr|A0A8I6YME5|A0A8I6YME5_HORVV UBX domain-containing protein OS=Hordeum vulgare subsp. vulgare OX=112509 PE=4 SV=1	3.6637	2.94956	0.0490856	0.805077	-0.534736
A0A8I6YMG7	>tr|A0A8I6YMG7|A0A8I6YMG7_HORVV H15 domain-containing protein OS=Hordeum vulgare subsp. vulgare OX=112509 PE=3 SV=1	3.72864	4.28545	0.604535	1.14933	0.34326
A0A8I6YMH5	>tr|A0A8I6YMH5|A0A8I6YMH5_HORVV Neprosin domain-containing protein OS=Hordeum vulgare subsp. vulgare OX=112509 PE=4 SV=1	0.649043	1.10714	0.222358	1.70581	1.3171
A0A8I6YMJ5	>tr|A0A8I6YMJ5|A0A8I6YMJ5_HORVV monodehydroascorbate reductase (NADH) OS=Hordeum vulgare subsp. vulgare OX=112509 PE=3 SV=1	1.13813	0.779895	0.267779	0.685243	-0.932216
A0A8I6YML6	>tr|A0A8I6YML6|A0A8I6YML6_HORVV TIM-barrel signal transduction protein OS=Hordeum vulgare subsp. vulgare OX=112509 PE=4 SV=1	1.73396	1.73148	0.987551	0.998573	-0.00352194
A0A8I6YMN3	>tr|A0A8I6YMN3|A0A8I6YMN3_HORVV Ubiquitin carboxyl-terminal hydrolase OS=Hordeum vulgare subsp. vulgare OX=112509 PE=3 SV=1	1.48978	1.04338	0.45373	0.700356	-0.878416
A0A8I6YMP0	>tr|A0A8I6YMP0|A0A8I6YMP0_HORVV 11-beta-hydroxysteroid dehydrogenase-like 5 OS=Hordeum vulgare subsp. vulgare OX=112509 PE=3 SV=1	0.651259	0.583701	0.737975	0.896265	-0.270108
A0A8I6YMP7	>tr|A0A8I6YMP7|A0A8I6YMP7_HORVV Alpha-soluble NSF attachment protein OS=Hordeum vulgare subsp. vulgare OX=112509 PE=3 SV=1	3.43954	3.52029	0.857801	1.02348	0.0572286
A0A8I6YMQ5	>tr|A0A8I6YMQ5|A0A8I6YMQ5_HORVV Conserved oligomeric Golgi complex subunit 3 OS=Hordeum vulgare subsp. vulgare OX=112509 PE=3 SV=1	0.615055	0.478611	0.288954	0.77816	-0.618605
A0A8I6YMV1	>tr|A0A8I6YMV1|A0A8I6YMV1_HORVV Structural maintenance of chromosomes protein OS=Hordeum vulgare subsp. vulgare OX=112509 PE=3 SV=1	1.18875	1.08553	0.364157	0.91317	-0.224023
A0A8I6YMY2	>tr|A0A8I6YMY2|A0A8I6YMY2_HORVV Subtilisin-like protease OS=Hordeum vulgare subsp. vulgare OX=112509 PE=3 SV=1	1.04579	1.17808	0.551257	1.12649	0.293762
A0A8I6YMY4	>tr|A0A8I6YMY4|A0A8I6YMY4_HORVV RRM domain-containing protein OS=Hordeum vulgare subsp. vulgare OX=112509 PE=4 SV=1	1.90795	1.9957	0.844181	1.04599	0.110902
A0A8I6YMY5	>tr|A0A8I6YMY5|A0A8I6YMY5_HORVV Serpin domain-containing protein OS=Hordeum vulgare subsp. vulgare OX=112509 PE=3 SV=1	24.0596	23.9658	0.981247	0.996104	-0.00962862
A0A8I6YMZ0	>tr|A0A8I6YMZ0|A0A8I6YMZ0_HORVV Fibrillarin OS=Hordeum vulgare subsp. vulgare OX=112509 PE=3 SV=1	0.569904	0.53528	0.605542	0.939245	-0.154584
A0A8I6YN19	>tr|A0A8I6YN19|A0A8I6YN19_HORVV J domain-containing protein OS=Hordeum vulgare subsp. vulgare OX=112509 PE=4 SV=1	1.01887	0.35367	0.169003	0.347122	-2.60955
A0A8I6YN24	>tr|A0A8I6YN24|A0A8I6YN24_HORVV AAA+ ATPase domain-containing protein OS=Hordeum vulgare subsp. vulgare OX=112509 PE=3 SV=1	6.50914	5.94372	0.203946	0.913135	-0.224117
A0A8I6YNB7	>tr|A0A8I6YNB7|A0A8I6YNB7_HORVV Neprosin domain-containing protein OS=Hordeum vulgare subsp. vulgare OX=112509 PE=4 SV=1	0.821865	1.02331	0.153383	1.24511	0.540669
A0A8I6YNG2	>tr|A0A8I6YNG2|A0A8I6YNG2_HORVV spermidine synthase OS=Hordeum vulgare subsp. vulgare OX=112509 PE=3 SV=1	1.36406	1.3038	0.904062	0.95582	-0.111442
A0A8I6YNI8	>tr|A0A8I6YNI8|A0A8I6YNI8_HORVV Ubiquitin-like domain-containing protein OS=Hordeum vulgare subsp. vulgare OX=112509 PE=3 SV=1	21.3009	16.5842	0.129405	0.778567	-0.617315
A0A8I6YNS2	>tr|A0A8I6YNS2|A0A8I6YNS2_HORVV Vesicle-associated membrane protein 727 OS=Hordeum vulgare subsp. vulgare OX=112509 PE=3 SV=1	6.03797	5.20187	0.459524	0.861527	-0.3676
A0A8I6YNS5	>tr|A0A8I6YNS5|A0A8I6YNS5_HORVV Seed maturation protein OS=Hordeum vulgare subsp. vulgare OX=112509 PE=4 SV=1	17.9962	14.1342	0.0173272	0.785402	-0.595761
A0A8I6YNV4	>tr|A0A8I6YNV4|A0A8I6YNV4_HORVV Protein kinase domain-containing protein OS=Hordeum vulgare subsp. vulgare OX=112509 PE=4 SV=1	1.09955	0.828574	0.67232	0.753559	-0.697835
A0A8I6YNZ2	>tr|A0A8I6YNZ2|A0A8I6YNZ2_HORVV Conserved oligomeric Golgi complex subunit 2 OS=Hordeum vulgare subsp. vulgare OX=112509 PE=3 SV=1	0.753664	0.642583	0.386536	0.852613	-0.393252
A0A8I6YNZ7	>tr|A0A8I6YNZ7|A0A8I6YNZ7_HORVV S-(hydroxymethyl)glutathione dehydrogenase OS=Hordeum vulgare subsp. vulgare OX=112509 PE=3 SV=1	2.60783	2.39289	0.776172	0.91758	-0.212139
A0A8I6YP10	>tr|A0A8I6YP10|A0A8I6YP10_HORVV T-complex protein 1 subunit gamma OS=Hordeum vulgare subsp. vulgare OX=112509 PE=3 SV=1	5.77487	3.67412	0.21067	0.636226	-1.11527
A0A8I6YP48	>tr|A0A8I6YP48|A0A8I6YP48_HORVV Uncharacterized protein OS=Hordeum vulgare subsp. vulgare OX=112509 PE=3 SV=1	1.94303	1.01259	0.574716	0.521137	-1.60739
A0A8I6YP85	>tr|A0A8I6YP85|A0A8I6YP85_HORVV Uncharacterized protein OS=Hordeum vulgare subsp. vulgare OX=112509 PE=4 SV=1	1.1712	1.08244	0.821481	0.924214	-0.194374
A0A8I6YP98	>tr|A0A8I6YP98|A0A8I6YP98_HORVV Endoplasmic reticulum transmembrane protein OS=Hordeum vulgare subsp. vulgare OX=112509 PE=3 SV=1	3.87121	3.1933	0.527142	0.824883	-0.474798
A0A8I6YPA4	>tr|A0A8I6YPA4|A0A8I6YPA4_HORVV Sigma 54 modulation/S30EA ribosomal protein C-terminal domain-containing protein OS=Hordeum vulgare subsp. vulgare OX=112509 PE=3 SV=1	3.02241	2.47513	0.556621	0.818926	-0.492674
A0A8I6YPB9	>tr|A0A8I6YPB9|A0A8I6YPB9_HORVV Importin N-terminal domain-containing protein OS=Hordeum vulgare subsp. vulgare OX=112509 PE=3 SV=1	1.71443	0.814712	0.39628	0.475208	-1.83494
A0A8I6YPI7	>tr|A0A8I6YPI7|A0A8I6YPI7_HORVV Enoyl-[acyl-carrier-protein] reductase (NADH) OS=Hordeum vulgare subsp. vulgare OX=112509 PE=3 SV=1	1.70271	2.5563	0.0545984	1.50131	1.00216
A0A8I6YPK8	>tr|A0A8I6YPK8|A0A8I6YPK8_HORVV fructan beta-(2,1)-fructosidase OS=Hordeum vulgare subsp. vulgare OX=112509 PE=3 SV=1	3.06829	2.49395	0.468329	0.812812	-0.511154
A0A8I6YPP1	>tr|A0A8I6YPP1|A0A8I6YPP1_HORVV ARC6 IMS domain-containing protein OS=Hordeum vulgare subsp. vulgare OX=112509 PE=4 SV=1	1.32108	1.10166	0.514554	0.833914	-0.447943
A0A8I6YPQ8	>tr|A0A8I6YPQ8|A0A8I6YPQ8_HORVV STI1 domain-containing protein OS=Hordeum vulgare subsp. vulgare OX=112509 PE=3 SV=1	8.70443	7.39023	0.475883	0.849019	-0.403669
A0A8I6YPR9	>tr|A0A8I6YPR9|A0A8I6YPR9_HORVV glutamate--tRNA ligase OS=Hordeum vulgare subsp. vulgare OX=112509 PE=3 SV=1	0.838219	1.07729	0.255436	1.28522	0.618863
A0A8I6YPU8	>tr|A0A8I6YPU8|A0A8I6YPU8_HORVV Mitochondrial pyruvate carrier OS=Hordeum vulgare subsp. vulgare OX=112509 PE=3 SV=1	1.57633	0.920213	0.461199	0.583769	-1.32749
A0A8I6YPW9	>tr|A0A8I6YPW9|A0A8I6YPW9_HORVV K Homology domain-containing protein OS=Hordeum vulgare subsp. vulgare OX=112509 PE=4 SV=1	3.52527	3.11011	0.468885	0.882233	-0.309024
A0A8I6YPX2	>tr|A0A8I6YPX2|A0A8I6YPX2_HORVV 3'(2'),5'-bisphosphate nucleotidase OS=Hordeum vulgare subsp. vulgare OX=112509 PE=3 SV=1	0.819928	0.722637	0.561647	0.881342	-0.311518
A0A8I6YPY2	>tr|A0A8I6YPY2|A0A8I6YPY2_HORVV FAD-binding PCMH-type domain-containing protein OS=Hordeum vulgare subsp. vulgare OX=112509 PE=3 SV=1	1.81858	2.05398	0.626921	1.12944	0.300202
A0A8I6YQ17	>tr|A0A8I6YQ17|A0A8I6YQ17_HORVV LsmAD domain-containing protein OS=Hordeum vulgare subsp. vulgare OX=112509 PE=4 SV=1	5.78759	2.15022	0.141471	0.371522	-2.442
A0A8I6YQ25	>tr|A0A8I6YQ25|A0A8I6YQ25_HORVV Uncharacterized protein OS=Hordeum vulgare subsp. vulgare OX=112509 PE=4 SV=1	0.325244	0.357401	0.768008	1.09887	0.232531
A0A8I6YQ76	>tr|A0A8I6YQ76|A0A8I6YQ76_HORVV Pre-mRNA-processing protein 40A OS=Hordeum vulgare subsp. vulgare OX=112509 PE=4 SV=1	0.507283	0.63398	0.639482	1.24976	0.549858
A0A8I6YQA2	>tr|A0A8I6YQA2|A0A8I6YQA2_HORVV Uncharacterized protein OS=Hordeum vulgare subsp. vulgare OX=112509 PE=4 SV=1	2.19672	1.99926	0.753979	0.910111	-0.232299
A0A8I6YQG4	>tr|A0A8I6YQG4|A0A8I6YQG4_HORVV Translation initiation factor eIF2B subunit gamma OS=Hordeum vulgare subsp. vulgare OX=112509 PE=3 SV=1	0.656848	0.697545	0.198738	1.06196	0.14826
A0A8I6YQI6	>tr|A0A8I6YQI6|A0A8I6YQI6_HORVV Uncharacterized protein OS=Hordeum vulgare subsp. vulgare OX=112509 PE=3 SV=1	0.760178	0.626126	0.0746317	0.823657	-0.478466
A0A8I6YQJ7	>tr|A0A8I6YQJ7|A0A8I6YQJ7_HORVV Peptide-methionine (R)-S-oxide reductase OS=Hordeum vulgare subsp. vulgare OX=112509 PE=3 SV=1	0.631987	0.634429	0.991439	1.00387	0.00951429
A0A8I6YQK7	>tr|A0A8I6YQK7|A0A8I6YQK7_HORVV ATP-dependent helicase/nuclease subunit A OS=Hordeum vulgare subsp. vulgare OX=112509 PE=4 SV=1	0.471554	0.429347	0.767544	0.910496	-0.231256
A0A8I6YQM9	>tr|A0A8I6YQM9|A0A8I6YQM9_HORVV MINDY deubiquitinase domain-containing protein OS=Hordeum vulgare subsp. vulgare OX=112509 PE=4 SV=1	0.662433	0.713203	0.809561	1.07664	0.18213
A0A8I6YQU0	>tr|A0A8I6YQU0|A0A8I6YQU0_HORVV GTP cyclohydrolase II OS=Hordeum vulgare subsp. vulgare OX=112509 PE=3 SV=1	0.856606	0.863694	0.886144	1.00827	0.0203245
A0A8I6YQW4	>tr|A0A8I6YQW4|A0A8I6YQW4_HORVV 3-hydroxyacyl-CoA dehydrogenase OS=Hordeum vulgare subsp. vulgare OX=112509 PE=3 SV=1	0.599201	0.366664	0.137877	0.611921	-1.21133
A0A8I6YQZ8	>tr|A0A8I6YQZ8|A0A8I6YQZ8_HORVV DNA-directed RNA polymerase RpoA/D/Rpb3-type domain-containing protein OS=Hordeum vulgare subsp. vulgare OX=112509 PE=3 SV=1	0.614386	0.687308	0.681469	1.11869	0.276618
A0A8I6YR15	>tr|A0A8I6YR15|A0A8I6YR15_HORVV CCR4-NOT transcription complex subunit 10 OS=Hordeum vulgare subsp. vulgare OX=112509 PE=3 SV=1	0.806871	0.68707	0.458761	0.851523	-0.396405
A0A8I6YR29	>tr|A0A8I6YR29|A0A8I6YR29_HORVV Peroxidase OS=Hordeum vulgare subsp. vulgare OX=112509 PE=3 SV=1	0.866553	2.04105	0.0677355	2.35537	2.11288
A0A8I6YR61	>tr|A0A8I6YR61|A0A8I6YR61_HORVV Coatomer subunit zeta OS=Hordeum vulgare subsp. vulgare OX=112509 PE=3 SV=1	0.452485	0.720087	0.327921	1.5914	1.14589
A0A8I6YRA8	>tr|A0A8I6YRA8|A0A8I6YRA8_HORVV Uncharacterized protein OS=Hordeum vulgare subsp. vulgare OX=112509 PE=4 SV=1	2.72663	0.909075	0.487891	0.333406	-2.70897
A0A8I6YRT0	>tr|A0A8I6YRT0|A0A8I6YRT0_HORVV Protein arginine N-methyltransferase OS=Hordeum vulgare subsp. vulgare OX=112509 PE=3 SV=1	0.728738	0.692737	0.455121	0.950598	-0.124953
A0A8I6YRT2	>tr|A0A8I6YRT2|A0A8I6YRT2_HORVV Saposin B-type domain-containing protein OS=Hordeum vulgare subsp. vulgare OX=112509 PE=4 SV=1	3.20793	0.899179	0.103053	0.280299	-3.13689
A0A8I6YRT8	>tr|A0A8I6YRT8|A0A8I6YRT8_HORVV CYTH domain-containing protein OS=Hordeum vulgare subsp. vulgare OX=112509 PE=4 SV=1	0.718665	0.957901	0.549638	1.33289	0.708688
A0A8I6YRV7	>tr|A0A8I6YRV7|A0A8I6YRV7_HORVV Peptidase M20 dimerisation domain-containing protein OS=Hordeum vulgare subsp. vulgare OX=112509 PE=3 SV=1	0.843345	0.871471	0.837999	1.03335	0.0809116
A0A8I6YRZ3	>tr|A0A8I6YRZ3|A0A8I6YRZ3_HORVV V-type proton ATPase catalytic subunit A OS=Hordeum vulgare subsp. vulgare OX=112509 PE=3 SV=1	2.38824	2.16277	0.464967	0.905593	-0.244571
A0A8I6YS17	>tr|A0A8I6YS17|A0A8I6YS17_HORVV SWI/SNF-related matrix-associated actin-dependent regulator of chromatin subfamily A member 3-like 2 OS=Hordeum vulgare subsp. vulgare OX=112509 PE=3 SV=1	1.23548	1.13554	0.282122	0.919104	-0.208048
A0A8I6YSA7	>tr|A0A8I6YSA7|A0A8I6YSA7_HORVV Peptidyl-prolyl cis-trans isomerase OS=Hordeum vulgare subsp. vulgare OX=112509 PE=3 SV=1	2.91227	2.93108	0.973869	1.00646	0.0158756
A0A8I6YSG5	>tr|A0A8I6YSG5|A0A8I6YSG5_HORVV Xaa-Pro dipeptidase OS=Hordeum vulgare subsp. vulgare OX=112509 PE=3 SV=1	0.72575	0.792985	0.81413	1.09264	0.218513
A0A8I6YSL3	>tr|A0A8I6YSL3|A0A8I6YSL3_HORVV Peptidyl-prolyl cis-trans isomerase OS=Hordeum vulgare subsp. vulgare OX=112509 PE=3 SV=1	1.71135	1.21956	0.113253	0.712633	-0.835558
A0A8I6YSN8	>tr|A0A8I6YSN8|A0A8I6YSN8_HORVV PX domain-containing protein OS=Hordeum vulgare subsp. vulgare OX=112509 PE=4 SV=1	0.709541	0.697683	0.960574	0.983288	-0.0415654
A0A8I6YSP3	>tr|A0A8I6YSP3|A0A8I6YSP3_HORVV Prohibitin OS=Hordeum vulgare subsp. vulgare OX=112509 PE=3 SV=1	3.44432	2.88416	0.467412	0.837367	-0.437751
A0A8I6YSV2	>tr|A0A8I6YSV2|A0A8I6YSV2_HORVV Uncharacterized protein OS=Hordeum vulgare subsp. vulgare OX=112509 PE=4 SV=1	0.621499	0.559603	0.544012	0.900409	-0.258732
A0A8I6YSV4	>tr|A0A8I6YSV4|A0A8I6YSV4_HORVV Thaumatin-like protein OS=Hordeum vulgare subsp. vulgare OX=112509 PE=4 SV=1	0.72395	0.551452	0.153699	0.761726	-0.671249
A0A8I6YSY8	>tr|A0A8I6YSY8|A0A8I6YSY8_HORVV Protein NBR1 homolog OS=Hordeum vulgare subsp. vulgare OX=112509 PE=4 SV=1	0.326299	0.461841	0.376274	1.41539	0.856808
A0A8I6YSZ6	>tr|A0A8I6YSZ6|A0A8I6YSZ6_HORVV Isopropylmalate dehydrogenase-like domain-containing protein OS=Hordeum vulgare subsp. vulgare OX=112509 PE=3 SV=1	2.92366	3.9305	0.333047	1.34438	0.729856
A0A8I6YSZ9	>tr|A0A8I6YSZ9|A0A8I6YSZ9_HORVV RRM domain-containing protein OS=Hordeum vulgare subsp. vulgare OX=112509 PE=4 SV=1	0.536026	0.305777	0.150177	0.570451	-1.38441
A0A8I6YT49	>tr|A0A8I6YT49|A0A8I6YT49_HORVV Histidine kinase/HSP90-like ATPase domain-containing protein OS=Hordeum vulgare subsp. vulgare OX=112509 PE=3 SV=1	8.20674	9.39777	0.406882	1.14513	0.334225
A0A8I6YT76	>tr|A0A8I6YT76|A0A8I6YT76_HORVV Alpha/beta hydrolase fold-3 domain-containing protein OS=Hordeum vulgare subsp. vulgare OX=112509 PE=4 SV=1	0.763017	0.616469	0.22135	0.807936	-0.525995
A0A8I6YT84	>tr|A0A8I6YT84|A0A8I6YT84_HORVV Uncharacterized protein OS=Hordeum vulgare subsp. vulgare OX=112509 PE=4 SV=1	1.03952	0.850243	0.405039	0.817922	-0.495699
A0A8I6YT94	>tr|A0A8I6YT94|A0A8I6YT94_HORVV Phytocyanin domain-containing protein OS=Hordeum vulgare subsp. vulgare OX=112509 PE=3 SV=1	1.94076	1.59084	0.720892	0.819702	-0.490337
A0A8I6YTB9	>tr|A0A8I6YTB9|A0A8I6YTB9_HORVV HMG box domain-containing protein OS=Hordeum vulgare subsp. vulgare OX=112509 PE=4 SV=1	0.694185	0.219648	0.0414097	0.316412	-2.838
A0A8I6YTC9	>tr|A0A8I6YTC9|A0A8I6YTC9_HORVV FAD dependent oxidoreductase domain-containing protein OS=Hordeum vulgare subsp. vulgare OX=112509 PE=4 SV=1	1.00528	0.955225	0.82051	0.950207	-0.125966
A0A8I6YTH6	>tr|A0A8I6YTH6|A0A8I6YTH6_HORVV ACT domain-containing protein ACR OS=Hordeum vulgare subsp. vulgare OX=112509 PE=4 SV=1	1.05006	1.14056	0.813702	1.08619	0.203902
A0A8I6YTI2	>tr|A0A8I6YTI2|A0A8I6YTI2_HORVV Carboxypeptidase OS=Hordeum vulgare subsp. vulgare OX=112509 PE=3 SV=1	0.557729	0.532684	0.857017	0.955094	-0.113316
A0A8I6YTP1	>tr|A0A8I6YTP1|A0A8I6YTP1_HORVV Uncharacterized protein OS=Hordeum vulgare subsp. vulgare OX=112509 PE=4 SV=1	2.77583	3.98694	0.470201	1.4363	0.892979
A0A8I6YTU3	>tr|A0A8I6YTU3|A0A8I6YTU3_HORVV Glycosyltransferase OS=Hordeum vulgare subsp. vulgare OX=112509 PE=3 SV=1	1.02985	0.863633	0.739158	0.838599	-0.434124
A0A8I6YTX4	>tr|A0A8I6YTX4|A0A8I6YTX4_HORVV Mg-protoporphyrin IX chelatase OS=Hordeum vulgare subsp. vulgare OX=112509 PE=3 SV=1	1.20929	1.22288	0.884247	1.01124	0.027575
A0A8I6YTX6	>tr|A0A8I6YTX6|A0A8I6YTX6_HORVV Cyclase OS=Hordeum vulgare subsp. vulgare OX=112509 PE=3 SV=1	0.822203	0.660039	0.368214	0.802769	-0.541818
A0A8I6YU20	>tr|A0A8I6YU20|A0A8I6YU20_HORVV Late embryogenesis abundant protein LEA-2 subgroup domain-containing protein OS=Hordeum vulgare subsp. vulgare OX=112509 PE=4 SV=1	1.10324	0.987696	0.704311	0.895266	-0.272858
A0A8I6YUB6	>tr|A0A8I6YUB6|A0A8I6YUB6_HORVV T-complex protein 1 subunit alpha OS=Hordeum vulgare subsp. vulgare OX=112509 PE=3 SV=1	4.75827	2.83933	0.501658	0.596716	-1.27339
A0A8I6YUM7	>tr|A0A8I6YUM7|A0A8I6YUM7_HORVV Signal peptidase complex subunit 3 OS=Hordeum vulgare subsp. vulgare OX=112509 PE=3 SV=1	1.83222	1.85459	0.916336	1.01221	0.0299333
A0A8I6YUP9	>tr|A0A8I6YUP9|A0A8I6YUP9_HORVV Pyruvate phosphate dikinase AMP/ATP-binding domain-containing protein OS=Hordeum vulgare subsp. vulgare OX=112509 PE=3 SV=1	0.739384	0.96977	0.280332	1.31159	0.668965
A0A8I6YUS4	>tr|A0A8I6YUS4|A0A8I6YUS4_HORVV COP9 signalosome complex subunit 6 OS=Hordeum vulgare subsp. vulgare OX=112509 PE=3 SV=1	0.954811	1.60399	0.614073	1.67991	1.27937
A0A8I6YV22	>tr|A0A8I6YV22|A0A8I6YV22_HORVV Annexin OS=Hordeum vulgare subsp. vulgare OX=112509 PE=3 SV=1	3.39148	2.6785	0.105994	0.789773	-0.582072
A0A8I6YVF5	>tr|A0A8I6YVF5|A0A8I6YVF5_HORVV L-ascorbate peroxidase OS=Hordeum vulgare subsp. vulgare OX=112509 PE=3 SV=1	3.11133	3.56458	0.597871	1.14568	0.335407
A0A8I6YVI8	>tr|A0A8I6YVI8|A0A8I6YVI8_HORVV Calcium-binding EF hand family protein OS=Hordeum vulgare subsp. vulgare OX=112509 PE=4 SV=1	0.625343	0.530386	0.611347	0.848152	-0.406188
A0A8I6YVL6	>tr|A0A8I6YVL6|A0A8I6YVL6_HORVV Transmembrane protein 208 OS=Hordeum vulgare subsp. vulgare OX=112509 PE=3 SV=1	0.590821	0.526784	0.367248	0.891613	-0.282941
A0A8I6YVS8	>tr|A0A8I6YVS8|A0A8I6YVS8_HORVV 2-C-methyl-D-erythritol 2,4-cyclodiphosphate synthase OS=Hordeum vulgare subsp. vulgare OX=112509 PE=3 SV=1	0.817528	0.685094	0.544892	0.838006	-0.435869
A0A8I6YVV9	>tr|A0A8I6YVV9|A0A8I6YVV9_HORVV Replication protein A subunit OS=Hordeum vulgare subsp. vulgare OX=112509 PE=3 SV=1	0.439163	0.488895	0.717976	1.11324	0.264575
A0A8I6YWJ4	>tr|A0A8I6YWJ4|A0A8I6YWJ4_HORVV Methylenetetrahydrofolate reductase OS=Hordeum vulgare subsp. vulgare OX=112509 PE=3 SV=1	1.07262	1.1697	0.805978	1.09051	0.213687
A0A8I6YWJ8	>tr|A0A8I6YWJ8|A0A8I6YWJ8_HORVV Enoyl reductase (ER) domain-containing protein OS=Hordeum vulgare subsp. vulgare OX=112509 PE=4 SV=1	0.616726	0.886484	0.448501	1.4374	0.894868
A0A8I6YWR4	>tr|A0A8I6YWR4|A0A8I6YWR4_HORVV DJ-1/PfpI domain-containing protein OS=Hordeum vulgare subsp. vulgare OX=112509 PE=4 SV=1	2.11458	1.66966	0.552453	0.789597	-0.582623
A0A8I6YX24	>tr|A0A8I6YX24|A0A8I6YX24_HORVV SBP-type domain-containing protein OS=Hordeum vulgare subsp. vulgare OX=112509 PE=4 SV=1	0.654587	0.587884	0.671121	0.898098	-0.265069
A0A8I6YX90	>tr|A0A8I6YX90|A0A8I6YX90_HORVV Uncharacterized protein OS=Hordeum vulgare subsp. vulgare OX=112509 PE=3 SV=1	0.823308	0.694811	0.349285	0.843926	-0.41851
A0A8I6YXD9	>tr|A0A8I6YXD9|A0A8I6YXD9_HORVV Fe2OG dioxygenase domain-containing protein OS=Hordeum vulgare subsp. vulgare OX=112509 PE=4 SV=1	0.705117	0.509317	0.488196	0.722315	-0.802273
A0A8I6YXF0	>tr|A0A8I6YXF0|A0A8I6YXF0_HORVV Cysteine-rich transmembrane CYSTM domain-containing protein OS=Hordeum vulgare subsp. vulgare OX=112509 PE=3 SV=1	4.0994	3.6366	0.355231	0.887106	-0.295441
A0A8I6YXF1	>tr|A0A8I6YXF1|A0A8I6YXF1_HORVV SAM domain-containing protein OS=Hordeum vulgare subsp. vulgare OX=112509 PE=4 SV=1	1.42722	0.834409	0.22227	0.58464	-1.32381
A0A8I6YXG1	>tr|A0A8I6YXG1|A0A8I6YXG1_HORVV Exocyst complex component Sec6 OS=Hordeum vulgare subsp. vulgare OX=112509 PE=3 SV=1	0.877051	0.892877	0.909483	1.01804	0.0441066
A0A8I6YXG5	>tr|A0A8I6YXG5|A0A8I6YXG5_HORVV L-ascorbate peroxidase OS=Hordeum vulgare subsp. vulgare OX=112509 PE=3 SV=1	3.19804	2.90351	0.0889924	0.907903	-0.238287
A0A8I6YXP8	>tr|A0A8I6YXP8|A0A8I6YXP8_HORVV Uncharacterized protein OS=Hordeum vulgare subsp. vulgare OX=112509 PE=3 SV=1	1.96753	1.84905	0.848183	0.939782	-0.153177
A0A8I6YXR3	>tr|A0A8I6YXR3|A0A8I6YXR3_HORVV Uncharacterized protein OS=Hordeum vulgare subsp. vulgare OX=112509 PE=4 SV=1	0.88122	0.752241	0.256138	0.853636	-0.390292
A0A8I6YXT0	>tr|A0A8I6YXT0|A0A8I6YXT0_HORVV BAG domain-containing protein OS=Hordeum vulgare subsp. vulgare OX=112509 PE=4 SV=1	0.870825	0.948769	0.805625	1.08951	0.211422
A0A8I6YY46	>tr|A0A8I6YY46|A0A8I6YY46_HORVV UBX domain-containing protein OS=Hordeum vulgare subsp. vulgare OX=112509 PE=4 SV=1	0.606204	0.63897	0.662605	1.05405	0.129828
A0A8I6YYH6	>tr|A0A8I6YYH6|A0A8I6YYH6_HORVV ATP citrate synthase OS=Hordeum vulgare subsp. vulgare OX=112509 PE=4 SV=1	1.52118	1.11677	0.0122194	0.734151	-0.762189
A0A8I6YYK1	>tr|A0A8I6YYK1|A0A8I6YYK1_HORVV Carboxypeptidase OS=Hordeum vulgare subsp. vulgare OX=112509 PE=3 SV=1	1.09571	0.866164	0.646152	0.790503	-0.579794
A0A8I6YYM4	>tr|A0A8I6YYM4|A0A8I6YYM4_HORVV Uncharacterized protein OS=Hordeum vulgare subsp. vulgare OX=112509 PE=4 SV=1	0.587004	0.564051	0.823808	0.960897	-0.0983765
A0A8I6YYN8	>tr|A0A8I6YYN8|A0A8I6YYN8_HORVV Pentatricopeptide repeat-containing protein OS=Hordeum vulgare subsp. vulgare OX=112509 PE=3 SV=1	0.649004	0.56187	0.400213	0.865743	-0.35556
A0A8I6YYQ5	>tr|A0A8I6YYQ5|A0A8I6YYQ5_HORVV Neurochondrin OS=Hordeum vulgare subsp. vulgare OX=112509 PE=4 SV=1	0.528404	0.65499	0.604007	1.23956	0.52966
A0A8I6YYT6	>tr|A0A8I6YYT6|A0A8I6YYT6_HORVV EF-hand domain-containing protein OS=Hordeum vulgare subsp. vulgare OX=112509 PE=4 SV=1	0.4831	0.286544	0.230527	0.593135	-1.28823
A0A8I6YZ06	>tr|A0A8I6YZ06|A0A8I6YZ06_HORVV ribose-5-phosphate isomerase OS=Hordeum vulgare subsp. vulgare OX=112509 PE=3 SV=1	0.631109	0.499809	0.290524	0.791954	-0.575271
A0A8I6YZ25	>tr|A0A8I6YZ25|A0A8I6YZ25_HORVV Uncharacterized protein OS=Hordeum vulgare subsp. vulgare OX=112509 PE=4 SV=1	0.678823	0.504724	0.633591	0.743528	-0.730885
A0A8I6YZ79	>tr|A0A8I6YZ79|A0A8I6YZ79_HORVV Basic secretory protease OS=Hordeum vulgare subsp. vulgare OX=112509 PE=4 SV=1	1.76277	2.33408	0.451689	1.3241	0.692369
A0A8I6YZ98	>tr|A0A8I6YZ98|A0A8I6YZ98_HORVV Peroxidase OS=Hordeum vulgare subsp. vulgare OX=112509 PE=3 SV=1	0.362375	0.521343	0.13926	1.43868	0.89706
A0A8I6YZB3	>tr|A0A8I6YZB3|A0A8I6YZB3_HORVV T-complex protein 1 subunit zeta OS=Hordeum vulgare subsp. vulgare OX=112509 PE=3 SV=1	1.68873	1.82116	0.695369	1.07842	0.186197
A0A8I6YZB4	>tr|A0A8I6YZB4|A0A8I6YZB4_HORVV Ribosome biogenesis regulatory protein OS=Hordeum vulgare subsp. vulgare OX=112509 PE=3 SV=1	1.09635	0.569078	0.23718	0.519066	-1.61721
A0A8I6YZG5	>tr|A0A8I6YZG5|A0A8I6YZG5_HORVV Nucleosome assembly protein 1 OS=Hordeum vulgare subsp. vulgare OX=112509 PE=3 SV=1	3.51455	2.91181	0.207217	0.828501	-0.464004
A0A8I6YZG6	>tr|A0A8I6YZG6|A0A8I6YZG6_HORVV Uncharacterized protein OS=Hordeum vulgare subsp. vulgare OX=112509 PE=4 SV=1	0.705397	0.565674	0.197424	0.801922	-0.544421
A0A8I6YZN2	>tr|A0A8I6YZN2|A0A8I6YZN2_HORVV DNA damage-binding protein 1 OS=Hordeum vulgare subsp. vulgare OX=112509 PE=3 SV=1	0.708128	0.910782	0.491691	1.28618	0.620717
A0A8I6YZW8	>tr|A0A8I6YZW8|A0A8I6YZW8_HORVV Polygalacturonase OS=Hordeum vulgare subsp. vulgare OX=112509 PE=3 SV=1	0.628788	0.422605	0.103699	0.672095	-0.979998
A0A8I6YZW9	>tr|A0A8I6YZW9|A0A8I6YZW9_HORVV AB hydrolase-1 domain-containing protein OS=Hordeum vulgare subsp. vulgare OX=112509 PE=3 SV=1	0.720349	0.755396	0.720008	1.04865	0.117164
A0A8I6Z032	>tr|A0A8I6Z032|A0A8I6Z032_HORVV Pectinesterase inhibitor domain-containing protein OS=Hordeum vulgare subsp. vulgare OX=112509 PE=4 SV=1	0.433291	0.374143	0.774797	0.863492	-0.361981
A0A8I6Z058	>tr|A0A8I6Z058|A0A8I6Z058_HORVV CBS domain-containing protein OS=Hordeum vulgare subsp. vulgare OX=112509 PE=4 SV=1	1.56534	1.8067	0.523827	1.15418	0.353652
A0A8I6Z0C9	>tr|A0A8I6Z0C9|A0A8I6Z0C9_HORVV Uncharacterized protein OS=Hordeum vulgare subsp. vulgare OX=112509 PE=3 SV=1	0.584653	0.54993	0.402972	0.94061	-0.151005
A0A8I6Z0L1	>tr|A0A8I6Z0L1|A0A8I6Z0L1_HORVV Succinate-semialdehyde dehydrogenase OS=Hordeum vulgare subsp. vulgare OX=112509 PE=3 SV=1	3.28721	4.5228	0.191874	1.37588	0.786975
A0A8I6Z0Q5	>tr|A0A8I6Z0Q5|A0A8I6Z0Q5_HORVV Pentacotripeptide-repeat region of PRORP domain-containing protein OS=Hordeum vulgare subsp. vulgare OX=112509 PE=4 SV=1	0.573392	0.514936	0.456019	0.898053	-0.265192
A0A8I6Z0R8	>tr|A0A8I6Z0R8|A0A8I6Z0R8_HORVV Peptidase S9 prolyl oligopeptidase catalytic domain-containing protein OS=Hordeum vulgare subsp. vulgare OX=112509 PE=4 SV=1	0.781933	0.766793	0.925109	0.980637	-0.048224
A0A8I6Z0S4	>tr|A0A8I6Z0S4|A0A8I6Z0S4_HORVV Protein kinase domain-containing protein OS=Hordeum vulgare subsp. vulgare OX=112509 PE=4 SV=1	4.6552	3.8764	0.15004	0.832703	-0.451527
A0A8I6Z0U6	>tr|A0A8I6Z0U6|A0A8I6Z0U6_HORVV RRM domain-containing protein OS=Hordeum vulgare subsp. vulgare OX=112509 PE=4 SV=1	2.65321	2.59616	0.880531	0.978496	-0.0536134
A0A8I6Z0V9	>tr|A0A8I6Z0V9|A0A8I6Z0V9_HORVV MRH domain-containing protein OS=Hordeum vulgare subsp. vulgare OX=112509 PE=4 SV=1	1.19326	1.03068	0.276889	0.863753	-0.361236
A0A8I6Z0Y7	>tr|A0A8I6Z0Y7|A0A8I6Z0Y7_HORVV Branched-chain-amino-acid aminotransferase-like protein 1 OS=Hordeum vulgare subsp. vulgare OX=112509 PE=4 SV=1	3.06406	2.83477	0.287205	0.925166	-0.191835
A0A8I6Z142	>tr|A0A8I6Z142|A0A8I6Z142_HORVV Nuclear pore complex protein NUP205 OS=Hordeum vulgare subsp. vulgare OX=112509 PE=3 SV=1	0.732409	0.713883	0.711812	0.974706	-0.063186
A0A8I6Z1C9	>tr|A0A8I6Z1C9|A0A8I6Z1C9_HORVV NADH dehydrogenase [ubiquinone] 1 beta subcomplex subunit 3-B OS=Hordeum vulgare subsp. vulgare OX=112509 PE=3 SV=1	2.18267	1.26999	0.233182	0.58185	-1.33561
A0A8I6Z1H5	>tr|A0A8I6Z1H5|A0A8I6Z1H5_HORVV Prolyl endopeptidase OS=Hordeum vulgare subsp. vulgare OX=112509 PE=3 SV=1	0.572168	0.829648	0.537455	1.45001	0.916402
A0A8I6Z1H8	>tr|A0A8I6Z1H8|A0A8I6Z1H8_HORVV Translocation protein SEC62 OS=Hordeum vulgare subsp. vulgare OX=112509 PE=3 SV=1	0.761236	1.14112	0.131633	1.49904	0.998417
A0A8I6Z1P9	>tr|A0A8I6Z1P9|A0A8I6Z1P9_HORVV Uncharacterized protein OS=Hordeum vulgare subsp. vulgare OX=112509 PE=4 SV=1	2.14541	2.56674	0.434651	1.19638	0.442218
A0A8I6Z1T7	>tr|A0A8I6Z1T7|A0A8I6Z1T7_HORVV Ribonucleoside-diphosphate reductase OS=Hordeum vulgare subsp. vulgare OX=112509 PE=3 SV=1	0.412798	0.549647	0.487515	1.33152	0.706148
A0A8I6Z261	>tr|A0A8I6Z261|A0A8I6Z261_HORVV C2H2-type domain-containing protein OS=Hordeum vulgare subsp. vulgare OX=112509 PE=4 SV=1	2.20775	1.25653	0.229027	0.569145	-1.39006
A0A8I6Z2G6	>tr|A0A8I6Z2G6|A0A8I6Z2G6_HORVV N-acyl-aliphatic-L-amino acid amidohydrolase OS=Hordeum vulgare subsp. vulgare OX=112509 PE=3 SV=1	0.922251	1.21886	0.117931	1.32162	0.687745
A0A8I6Z2Q4	>tr|A0A8I6Z2Q4|A0A8I6Z2Q4_HORVV Metal-dependent protein hydrolase OS=Hordeum vulgare subsp. vulgare OX=112509 PE=3 SV=1	0.880899	1.32692	0.135296	1.50633	1.01038
A0A8I6Z2S4	>tr|A0A8I6Z2S4|A0A8I6Z2S4_HORVV G3BP-like protein OS=Hordeum vulgare subsp. vulgare OX=112509 PE=4 SV=1	4.41236	3.80906	0.376195	0.86327	-0.362614
A0A8I6Z3J6	>tr|A0A8I6Z3J6|A0A8I6Z3J6_HORVV Expansin OS=Hordeum vulgare subsp. vulgare OX=112509 PE=3 SV=1	0.409791	0.89239	0.240111	2.17767	1.91942
A0A8I6Z3J7	>tr|A0A8I6Z3J7|A0A8I6Z3J7_HORVV Uncharacterized protein OS=Hordeum vulgare subsp. vulgare OX=112509 PE=3 SV=1	2.68207	0.957527	0.280724	0.35701	-2.54027
A0A8I6Z3M4	>tr|A0A8I6Z3M4|A0A8I6Z3M4_HORVV Uncharacterized protein OS=Hordeum vulgare subsp. vulgare OX=112509 PE=3 SV=1	13.5255	12.363	0.540871	0.914053	-0.221639
A0A8I6Z3Y5	>tr|A0A8I6Z3Y5|A0A8I6Z3Y5_HORVV Lipoxygenase OS=Hordeum vulgare subsp. vulgare OX=112509 PE=3 SV=1	0.472898	0.562941	0.676828	1.19041	0.429865
A0A8I6Z3Z5	>tr|A0A8I6Z3Z5|A0A8I6Z3Z5_HORVV Signal recognition particle 19 kDa protein OS=Hordeum vulgare subsp. vulgare OX=112509 PE=4 SV=1	0.644326	0.734868	0.531298	1.14052	0.324284
A0A8I6Z460	>tr|A0A8I6Z460|A0A8I6Z460_HORVV DNA/RNA-binding protein Alba-like domain-containing protein OS=Hordeum vulgare subsp. vulgare OX=112509 PE=4 SV=1	9.04233	8.03768	0.567011	0.888895	-0.290471
A0A8I6Z4A5	>tr|A0A8I6Z4A5|A0A8I6Z4A5_HORVV Uncharacterized protein OS=Hordeum vulgare subsp. vulgare OX=112509 PE=4 SV=1	0.837793	0.893336	0.636445	1.0663	0.158317
A0A8I6Z4E9	>tr|A0A8I6Z4E9|A0A8I6Z4E9_HORVV Aspartate aminotransferase OS=Hordeum vulgare subsp. vulgare OX=112509 PE=3 SV=1	2.14381	4.2315	0.276594	1.97382	1.67702
A0A8I6Z4K0	>tr|A0A8I6Z4K0|A0A8I6Z4K0_HORVV cinnamyl-alcohol dehydrogenase OS=Hordeum vulgare subsp. vulgare OX=112509 PE=3 SV=1	0.685619	0.636051	0.369183	0.927703	-0.185081
A0A8I6Z4K5	>tr|A0A8I6Z4K5|A0A8I6Z4K5_HORVV 7,8-dihydroneopterin aldolase OS=Hordeum vulgare subsp. vulgare OX=112509 PE=3 SV=1	1.17963	1.30457	0.909437	1.10592	0.248304
A0A8I6Z4K8	>tr|A0A8I6Z4K8|A0A8I6Z4K8_HORVV Aldehyde dehydrogenase domain-containing protein OS=Hordeum vulgare subsp. vulgare OX=112509 PE=3 SV=1	4.20273	3.20687	0.556579	0.763044	-0.666985
A0A8I6Z4M3	>tr|A0A8I6Z4M3|A0A8I6Z4M3_HORVV Auxin-responsive protein OS=Hordeum vulgare subsp. vulgare OX=112509 PE=3 SV=1	0.567124	0.382577	0.298917	0.674592	-0.970853
A0A8I6Z530	>tr|A0A8I6Z530|A0A8I6Z530_HORVV Aconitate hydratase OS=Hordeum vulgare subsp. vulgare OX=112509 PE=3 SV=1	3.62276	3.45008	0.625589	0.952335	-0.12045
A0A8I6Z554	>tr|A0A8I6Z554|A0A8I6Z554_HORVV Remorin C-terminal domain-containing protein OS=Hordeum vulgare subsp. vulgare OX=112509 PE=3 SV=1	0.70255	0.53376	0.214632	0.759746	-0.677667
A0A8I6Z597	>tr|A0A8I6Z597|A0A8I6Z597_HORVV SMP-LTD domain-containing protein OS=Hordeum vulgare subsp. vulgare OX=112509 PE=4 SV=1	0.683521	0.610079	0.546902	0.892553	-0.280343
A0A8I6Z5H4	>tr|A0A8I6Z5H4|A0A8I6Z5H4_HORVV Acyl-coenzyme A oxidase OS=Hordeum vulgare subsp. vulgare OX=112509 PE=3 SV=1	2.53932	2.04809	0.181702	0.806552	-0.530223
A0A8I6Z5S5	>tr|A0A8I6Z5S5|A0A8I6Z5S5_HORVV Uncharacterized protein OS=Hordeum vulgare subsp. vulgare OX=112509 PE=3 SV=1	7.09714	6.03822	0.339457	0.850797	-0.39851
A0A8I6Z5U9	>tr|A0A8I6Z5U9|A0A8I6Z5U9_HORVV Pectinesterase inhibitor domain-containing protein OS=Hordeum vulgare subsp. vulgare OX=112509 PE=3 SV=1	0.73048	0.564486	0.172205	0.772761	-0.635778
A0A8I6Z5Z3	>tr|A0A8I6Z5Z3|A0A8I6Z5Z3_HORVV Bifunctional inhibitor/plant lipid transfer protein/seed storage helical domain-containing protein OS=Hordeum vulgare subsp. vulgare OX=112509 PE=3 SV=1	3.09117	2.31087	0.395456	0.747572	-0.717509
A0A8I6Z6J4	>tr|A0A8I6Z6J4|A0A8I6Z6J4_HORVV 3-phosphoshikimate 1-carboxyvinyltransferase OS=Hordeum vulgare subsp. vulgare OX=112509 PE=3 SV=1	1.66731	1.86984	0.825546	1.12148	0.282749
A0A8I6Z6L6	>tr|A0A8I6Z6L6|A0A8I6Z6L6_HORVV AAA+ ATPase domain-containing protein OS=Hordeum vulgare subsp. vulgare OX=112509 PE=3 SV=1	3.04353	3.41743	0.220959	1.12285	0.285776
A0A8I6Z6U7	>tr|A0A8I6Z6U7|A0A8I6Z6U7_HORVV Protein arginine N-methyltransferase PRMT10 OS=Hordeum vulgare subsp. vulgare OX=112509 PE=4 SV=1	1.01794	0.932139	0.829045	0.915708	-0.217176
A0A8I6Z702	>tr|A0A8I6Z702|A0A8I6Z702_HORVV Aldehyde oxidase OS=Hordeum vulgare subsp. vulgare OX=112509 PE=3 SV=1	0.668508	0.928044	0.534704	1.38823	0.809024
A0A8I6Z742	>tr|A0A8I6Z742|A0A8I6Z742_HORVV Pre-mRNA-splicing factor SYF2 OS=Hordeum vulgare subsp. vulgare OX=112509 PE=3 SV=1	0.550125	0.518034	0.785811	0.941666	-0.148237
A0A8I6Z775	>tr|A0A8I6Z775|A0A8I6Z775_HORVV GDSL esterase/lipase OS=Hordeum vulgare subsp. vulgare OX=112509 PE=3 SV=1	0.850525	0.76464	0.375993	0.899022	-0.262533
A0A8I6Z7F1	>tr|A0A8I6Z7F1|A0A8I6Z7F1_HORVV Senescence domain-containing protein OS=Hordeum vulgare subsp. vulgare OX=112509 PE=4 SV=1	0.635248	1.05114	0.279252	1.65469	1.24206
A0A8I6Z7J9	>tr|A0A8I6Z7J9|A0A8I6Z7J9_HORVV HMA domain-containing protein OS=Hordeum vulgare subsp. vulgare OX=112509 PE=4 SV=1	1.22363	1.00399	0.448198	0.820503	-0.487927
A0A8I6Z7P9	>tr|A0A8I6Z7P9|A0A8I6Z7P9_HORVV Clathrin light chain OS=Hordeum vulgare subsp. vulgare OX=112509 PE=3 SV=1	7.91237	6.6029	0.0676374	0.834503	-0.446201
A0A8I6Z7U2	>tr|A0A8I6Z7U2|A0A8I6Z7U2_HORVV 1,3-beta-glucan synthase OS=Hordeum vulgare subsp. vulgare OX=112509 PE=3 SV=1	0.559707	0.376456	0.146161	0.672596	-0.978163
A0A8I6Z7W0	>tr|A0A8I6Z7W0|A0A8I6Z7W0_HORVV Bifunctional inhibitor/plant lipid transfer protein/seed storage helical domain-containing protein OS=Hordeum vulgare subsp. vulgare OX=112509 PE=4 SV=1	0.802669	0.758249	0.838258	0.94466	-0.140407
A0A8I6Z8F6	>tr|A0A8I6Z8F6|A0A8I6Z8F6_HORVV C2 domain-containing protein OS=Hordeum vulgare subsp. vulgare OX=112509 PE=4 SV=1	0.577382	0.52122	0.847481	0.90273	-0.252382
A0A8I6Z916	>tr|A0A8I6Z916|A0A8I6Z916_HORVV ADP/ATP translocase OS=Hordeum vulgare subsp. vulgare OX=112509 PE=3 SV=1	0.683072	0.79315	0.69543	1.16115	0.368498
A0A8I6Z9D1	>tr|A0A8I6Z9D1|A0A8I6Z9D1_HORVV Uncharacterized protein OS=Hordeum vulgare subsp. vulgare OX=112509 PE=3 SV=1	0.683929	0.707988	0.854989	1.03518	0.0852664
A0A8I6Z9G5	>tr|A0A8I6Z9G5|A0A8I6Z9G5_HORVV NmrA-like domain-containing protein OS=Hordeum vulgare subsp. vulgare OX=112509 PE=3 SV=1	1.22256	1.35771	0.747061	1.11055	0.258614
A0A8I6Z9Q5	>tr|A0A8I6Z9Q5|A0A8I6Z9Q5_HORVV UVR domain-containing protein OS=Hordeum vulgare subsp. vulgare OX=112509 PE=4 SV=1	1.16693	1.08766	0.845641	0.932075	-0.173484
A0A8I6Z9T9	>tr|A0A8I6Z9T9|A0A8I6Z9T9_HORVV peptidylprolyl isomerase OS=Hordeum vulgare subsp. vulgare OX=112509 PE=4 SV=1	3.34368	2.9621	0.147023	0.885881	-0.298848
A0A8I6Z9W4	>tr|A0A8I6Z9W4|A0A8I6Z9W4_HORVV Purple acid phosphatase OS=Hordeum vulgare subsp. vulgare OX=112509 PE=3 SV=1	1.04028	0.783024	0.385954	0.752704	-0.700636
A0A8I6Z9Z3	>tr|A0A8I6Z9Z3|A0A8I6Z9Z3_HORVV rRNA N-glycosylase OS=Hordeum vulgare subsp. vulgare OX=112509 PE=3 SV=1	2.56085	2.38354	0.755436	0.930765	-0.176955
A0A8I6ZA35	>tr|A0A8I6ZA35|A0A8I6ZA35_HORVV Probable 6-phosphogluconolactonase OS=Hordeum vulgare subsp. vulgare OX=112509 PE=3 SV=1	0.571782	1.26915	0.0218641	2.21964	1.96649
A0A8I6ZA75	>tr|A0A8I6ZA75|A0A8I6ZA75_HORVV NADH dehydrogenase [ubiquinone] iron-sulfur protein 5-B OS=Hordeum vulgare subsp. vulgare OX=112509 PE=3 SV=1	3.00218	2.30229	0.0311677	0.766873	-0.654641
A0A8I6ZAC4	>tr|A0A8I6ZAC4|A0A8I6ZAC4_HORVV Exocyst complex component Sec8 OS=Hordeum vulgare subsp. vulgare OX=112509 PE=3 SV=1	0.686859	0.613989	0.42447	0.893908	-0.276602
A0A8I6ZAL1	>tr|A0A8I6ZAL1|A0A8I6ZAL1_HORVV Co-chaperone protein p23 OS=Hordeum vulgare subsp. vulgare OX=112509 PE=3 SV=1	3.78089	3.66112	0.78955	0.968322	-0.0793906
A0A8I6ZB37	>tr|A0A8I6ZB37|A0A8I6ZB37_HORVV Succinate dehydrogenase [ubiquinone] iron-sulfur subunit, mitochondrial OS=Hordeum vulgare subsp. vulgare OX=112509 PE=3 SV=1	2.21473	1.8054	0.533331	0.815181	-0.503979
A0A8I6ZBD0	>tr|A0A8I6ZBD0|A0A8I6ZBD0_HORVV Pectinesterase inhibitor domain-containing protein OS=Hordeum vulgare subsp. vulgare OX=112509 PE=4 SV=1	0.93406	0.945303	0.899183	1.01204	0.0295088
A0A8I6ZBX9	>tr|A0A8I6ZBX9|A0A8I6ZBX9_HORVV Glutathione S-transferase OS=Hordeum vulgare subsp. vulgare OX=112509 PE=3 SV=1	1.12225	0.439881	0.244313	0.391963	-2.30991
A0A8I6ZC09	>tr|A0A8I6ZC09|A0A8I6ZC09_HORVV 3-hydroxyisobutyryl-CoA hydrolase OS=Hordeum vulgare subsp. vulgare OX=112509 PE=3 SV=1	1.10227	1.21948	0.862847	1.10633	0.249213
A0A8I6ZEF9	>tr|A0A8I6ZEF9|A0A8I6ZEF9_HORVV Bifunctional inhibitor/plant lipid transfer protein/seed storage helical domain-containing protein OS=Hordeum vulgare subsp. vulgare OX=112509 PE=4 SV=1	0.4281	0.482459	0.625039	1.12698	0.294816
A0A8I7B0D8	>tr|A0A8I7B0D8|A0A8I7B0D8_HORVV Protein HGH1 homolog OS=Hordeum vulgare subsp. vulgare OX=112509 PE=3 SV=1	0.695815	0.554228	0.644671	0.796515	-0.561106
A0A8I7B0N1	>tr|A0A8I7B0N1|A0A8I7B0N1_HORVV Uncharacterized protein OS=Hordeum vulgare subsp. vulgare OX=112509 PE=4 SV=1	1.38598	0.876073	0.162416	0.632098	-1.13132
A0A8I7B0V1	>tr|A0A8I7B0V1|A0A8I7B0V1_HORVV Cyanate hydratase OS=Hordeum vulgare subsp. vulgare OX=112509 GN=CYN PE=3 SV=1	3.08786	2.79643	0.486859	0.90562	-0.244497	CYN
A0A8I7B0X5	>tr|A0A8I7B0X5|A0A8I7B0X5_HORVV Protein TIC110, chloroplastic OS=Hordeum vulgare subsp. vulgare OX=112509 PE=4 SV=1	2.63959	2.92753	0.767589	1.10909	0.255352
A0A8I7B0Y3	>tr|A0A8I7B0Y3|A0A8I7B0Y3_HORVV Thioredoxin domain-containing protein OS=Hordeum vulgare subsp. vulgare OX=112509 PE=3 SV=1	2.57282	2.23594	0.404521	0.869064	-0.346118
A0A8I7B149	>tr|A0A8I7B149|A0A8I7B149_HORVV Nitronate monooxygenase domain-containing protein OS=Hordeum vulgare subsp. vulgare OX=112509 PE=4 SV=1	2.22195	2.43519	0.706519	1.09597	0.226015
A0A8I7B153	>tr|A0A8I7B153|A0A8I7B153_HORVV MPN domain-containing protein OS=Hordeum vulgare subsp. vulgare OX=112509 PE=4 SV=1	2.37191	2.17426	0.0666337	0.916672	-0.214583
A0A8I7B160	>tr|A0A8I7B160|A0A8I7B160_HORVV Phospholipid/glycerol acyltransferase domain-containing protein OS=Hordeum vulgare subsp. vulgare OX=112509 PE=3 SV=1	0.584453	0.506156	0.315412	0.866033	-0.354733
A0A8I7B162	>tr|A0A8I7B162|A0A8I7B162_HORVV Uncharacterized protein OS=Hordeum vulgare subsp. vulgare OX=112509 PE=3 SV=1	16.9811	13.1878	0.387834	0.776616	-0.623505
A0A8I7B1D8	>tr|A0A8I7B1D8|A0A8I7B1D8_HORVV MalT-like TPR region domain-containing protein OS=Hordeum vulgare subsp. vulgare OX=112509 PE=4 SV=1	2.22526	1.72893	0.236574	0.776957	-0.622421
A0A8I7B1E0	>tr|A0A8I7B1E0|A0A8I7B1E0_HORVV uracil phosphoribosyltransferase OS=Hordeum vulgare subsp. vulgare OX=112509 PE=3 SV=1	0.517144	0.651823	0.600616	1.26043	0.57083
A0A8I7B1F6	>tr|A0A8I7B1F6|A0A8I7B1F6_HORVV ATP-dependent 6-phosphofructokinase OS=Hordeum vulgare subsp. vulgare OX=112509 GN=PFK PE=3 SV=1	1.49794	0.944607	0.257847	0.630602	-1.13716	PFK
A0A8I7B1F9	>tr|A0A8I7B1F9|A0A8I7B1F9_HORVV Transcriptional regulatory protein OS=Hordeum vulgare subsp. vulgare OX=112509 PE=3 SV=1	0.822776	0.788982	0.862702	0.958928	-0.103436
A0A8I7B1T1	>tr|A0A8I7B1T1|A0A8I7B1T1_HORVV V-type proton ATPase subunit C OS=Hordeum vulgare subsp. vulgare OX=112509 PE=3 SV=1	3.64323	2.83609	0.251261	0.778453	-0.617677
A0A8I7B1T4	>tr|A0A8I7B1T4|A0A8I7B1T4_HORVV UDP-glucose 4-epimerase OS=Hordeum vulgare subsp. vulgare OX=112509 PE=3 SV=1	0.76764	0.79689	0.900557	1.0381	0.0922283
A0A8I7B1W9	>tr|A0A8I7B1W9|A0A8I7B1W9_HORVV Ankyrin-like protein OS=Hordeum vulgare subsp. vulgare OX=112509 PE=4 SV=1	2.50693	2.23027	0.645921	0.889642	-0.288399
A0A8I7B1X2	>tr|A0A8I7B1X2|A0A8I7B1X2_HORVV Bifunctional inhibitor/plant lipid transfer protein/seed storage helical domain-containing protein OS=Hordeum vulgare subsp. vulgare OX=112509 PE=3 SV=1	9.88153	7.43169	0.564337	0.752079	-0.702685
A0A8I7B220	>tr|A0A8I7B220|A0A8I7B220_HORVV Mitochondrial import inner membrane translocase subunit OS=Hordeum vulgare subsp. vulgare OX=112509 PE=3 SV=1	0.826199	0.628558	0.443607	0.760783	-0.674305
A0A8I7B295	>tr|A0A8I7B295|A0A8I7B295_HORVV Sex determination protein tasselseed-2 OS=Hordeum vulgare subsp. vulgare OX=112509 PE=3 SV=1	0.453148	0.423638	0.870792	0.934878	-0.166078
A0A8I7B2D2	>tr|A0A8I7B2D2|A0A8I7B2D2_HORVV X8 domain-containing protein OS=Hordeum vulgare subsp. vulgare OX=112509 PE=4 SV=1	0.982373	0.728814	0.283425	0.741891	-0.736321
A0A8I7B2E8	>tr|A0A8I7B2E8|A0A8I7B2E8_HORVV alanine transaminase OS=Hordeum vulgare subsp. vulgare OX=112509 PE=3 SV=1	0.990094	0.524655	0.0629085	0.529904	-1.56625
A0A8I7B2F3	>tr|A0A8I7B2F3|A0A8I7B2F3_HORVV DUF1677 family protein OS=Hordeum vulgare subsp. vulgare OX=112509 PE=4 SV=1	0.46916	0.369877	0.377801	0.788382	-0.586419
A0A8I7B2H8	>tr|A0A8I7B2H8|A0A8I7B2H8_HORVV RRM domain-containing protein OS=Hordeum vulgare subsp. vulgare OX=112509 PE=4 SV=1	10.6535	3.95266	0.0801252	0.37102	-2.44534
A0A8I7B2J8	>tr|A0A8I7B2J8|A0A8I7B2J8_HORVV Leucine-rich repeat-containing N-terminal plant-type domain-containing protein OS=Hordeum vulgare subsp. vulgare OX=112509 PE=3 SV=1	0.620069	0.448759	0.238448	0.723725	-0.797465
A0A8I7B2K6	>tr|A0A8I7B2K6|A0A8I7B2K6_HORVV DUF6598 domain-containing protein OS=Hordeum vulgare subsp. vulgare OX=112509 PE=4 SV=1	1.0381	1.01314	0.819893	0.975948	-0.0600441
A0A8I7B2K7	>tr|A0A8I7B2K7|A0A8I7B2K7_HORVV SEC7 domain-containing protein OS=Hordeum vulgare subsp. vulgare OX=112509 PE=4 SV=1	0.873765	2.62758	0.123924	3.0072	2.71542
A0A8I7B2Q1	>tr|A0A8I7B2Q1|A0A8I7B2Q1_HORVV Autophagy-related protein OS=Hordeum vulgare subsp. vulgare OX=112509 PE=3 SV=1	0.436326	0.420117	0.791119	0.962851	-0.0933648
A0A8I7B2R4	>tr|A0A8I7B2R4|A0A8I7B2R4_HORVV Cupin type-2 domain-containing protein OS=Hordeum vulgare subsp. vulgare OX=112509 PE=4 SV=1	0.656804	0.60333	0.576601	0.918585	-0.209442
A0A8I7B2U1	>tr|A0A8I7B2U1|A0A8I7B2U1_HORVV ubiquitinyl hydrolase 1 OS=Hordeum vulgare subsp. vulgare OX=112509 PE=3 SV=1	0.181601	0.689178	0.0109866	3.795	3.28927
A0A8I7B2X4	>tr|A0A8I7B2X4|A0A8I7B2X4_HORVV aspartate carbamoyltransferase OS=Hordeum vulgare subsp. vulgare OX=112509 PE=3 SV=1	0.427841	0.50862	0.550273	1.18881	0.426546
A0A8I7B312	>tr|A0A8I7B312|A0A8I7B312_HORVV Uncharacterized protein OS=Hordeum vulgare subsp. vulgare OX=112509 PE=3 SV=1	1.21267	0.986544	0.6051	0.813532	-0.508972
A0A8I7B314	>tr|A0A8I7B314|A0A8I7B314_HORVV Membrane-anchored ubiquitin-fold protein OS=Hordeum vulgare subsp. vulgare OX=112509 PE=4 SV=1	0.751689	0.849468	0.666043	1.13008	0.301599
A0A8I7B344	>tr|A0A8I7B344|A0A8I7B344_HORVV ubiquitinyl hydrolase 1 OS=Hordeum vulgare subsp. vulgare OX=112509 PE=3 SV=1	0.717799	0.272575	0.00735542	0.379737	-2.38806
A0A8I7B3A3	>tr|A0A8I7B3A3|A0A8I7B3A3_HORVV Uncharacterized protein OS=Hordeum vulgare subsp. vulgare OX=112509 PE=3 SV=1	1.9482	2.46891	0.44038	1.26728	0.584194
A0A8I7B3A8	>tr|A0A8I7B3A8|A0A8I7B3A8_HORVV peptide-methionine (S)-S-oxide reductase OS=Hordeum vulgare subsp. vulgare OX=112509 PE=3 SV=1	0.638569	1.47452	0.0744478	2.30909	2.06394
A0A8I7B3B9	>tr|A0A8I7B3B9|A0A8I7B3B9_HORVV Surfeit locus protein 2 OS=Hordeum vulgare subsp. vulgare OX=112509 PE=4 SV=1	1.04766	0.677282	0.0285049	0.646469	-1.07588
A0A8I7B3C2	>tr|A0A8I7B3C2|A0A8I7B3C2_HORVV Conserved oligomeric Golgi complex subunit 5 OS=Hordeum vulgare subsp. vulgare OX=112509 PE=4 SV=1	0.493509	0.356434	0.421153	0.722245	-0.802514
A0A8I7B3C6	>tr|A0A8I7B3C6|A0A8I7B3C6_HORVV NAC-A/B domain-containing protein OS=Hordeum vulgare subsp. vulgare OX=112509 PE=4 SV=1	10.362	9.81454	0.764811	0.94717	-0.133862
A0A8I7B3D9	>tr|A0A8I7B3D9|A0A8I7B3D9_HORVV Mitochondrial pyruvate carrier OS=Hordeum vulgare subsp. vulgare OX=112509 PE=3 SV=1	0.510729	0.474994	0.6678	0.930031	-0.178899
A0A8I7B3E1	>tr|A0A8I7B3E1|A0A8I7B3E1_HORVV chitinase OS=Hordeum vulgare subsp. vulgare OX=112509 PE=4 SV=1	2.25455	2.1976	0.886416	0.974739	-0.0631004
A0A8I7B3E2	>tr|A0A8I7B3E2|A0A8I7B3E2_HORVV Late embryogenesis abundant protein B19.4 OS=Hordeum vulgare subsp. vulgare OX=112509 PE=3 SV=1	25.1072	23.8514	0.650179	0.949985	-0.126545
A0A8I7B3E6	>tr|A0A8I7B3E6|A0A8I7B3E6_HORVV ALOG domain-containing protein OS=Hordeum vulgare subsp. vulgare OX=112509 PE=3 SV=1	1.23239	0.96788	0.368964	0.785369	-0.595863
A0A8I7B3J5	>tr|A0A8I7B3J5|A0A8I7B3J5_HORVV STI1 domain-containing protein OS=Hordeum vulgare subsp. vulgare OX=112509 PE=4 SV=1	4.86414	4.11735	0.2134	0.846469	-0.411087
A0A8I7B3K1	>tr|A0A8I7B3K1|A0A8I7B3K1_HORVV EndoU domain-containing protein OS=Hordeum vulgare subsp. vulgare OX=112509 PE=3 SV=1	0.81299	0.646665	0.356231	0.795416	-0.564512
A0A8I7B3K6	>tr|A0A8I7B3K6|A0A8I7B3K6_HORVV UspA domain-containing protein OS=Hordeum vulgare subsp. vulgare OX=112509 PE=4 SV=1	5.41877	4.73972	0.26622	0.874686	-0.330216
A0A8I7B3L1	>tr|A0A8I7B3L1|A0A8I7B3L1_HORVV Allyl alcohol dehydrogenase-like protein OS=Hordeum vulgare subsp. vulgare OX=112509 PE=4 SV=1	0.469517	0.465206	0.965093	0.990819	-0.022748
A0A8I7B3S1	>tr|A0A8I7B3S1|A0A8I7B3S1_HORVV UspA domain-containing protein OS=Hordeum vulgare subsp. vulgare OX=112509 PE=4 SV=1	10.5254	9.06671	0.186565	0.861408	-0.36794
A0A8I7B3T3	>tr|A0A8I7B3T3|A0A8I7B3T3_HORVV Aminotransferase class I/classII domain-containing protein OS=Hordeum vulgare subsp. vulgare OX=112509 PE=3 SV=1	1.61492	2.90865	0.531246	1.80112	1.45119
A0A8I7B3U1	>tr|A0A8I7B3U1|A0A8I7B3U1_HORVV Mitochondrial-processing peptidase subunit alpha OS=Hordeum vulgare subsp. vulgare OX=112509 PE=3 SV=1	2.94151	1.94945	0.184009	0.662737	-1.01458
A0A8I7B3X9	>tr|A0A8I7B3X9|A0A8I7B3X9_HORVV DUF4408 domain-containing protein OS=Hordeum vulgare subsp. vulgare OX=112509 PE=4 SV=1	0.440226	0.334541	0.369825	0.75993	-0.677073
A0A8I7B3Z6	>tr|A0A8I7B3Z6|A0A8I7B3Z6_HORVV non-specific serine/threonine protein kinase OS=Hordeum vulgare subsp. vulgare OX=112509 PE=3 SV=1	0.550516	0.361459	0.156598	0.656582	-1.03759
A0A8I7B421	>tr|A0A8I7B421|A0A8I7B421_HORVV Sulfhydryl oxidase OS=Hordeum vulgare subsp. vulgare OX=112509 PE=4 SV=1	0.876742	0.963235	0.641093	1.09865	0.232041
A0A8I7B433	>tr|A0A8I7B433|A0A8I7B433_HORVV Fe2OG dioxygenase domain-containing protein OS=Hordeum vulgare subsp. vulgare OX=112509 PE=3 SV=1	0.557604	0.575108	0.887555	1.03139	0.076228
A0A8I7B440	>tr|A0A8I7B440|A0A8I7B440_HORVV Gfo/Idh/MocA-like oxidoreductase N-terminal domain-containing protein OS=Hordeum vulgare subsp. vulgare OX=112509 PE=4 SV=1	0.619433	0.563703	0.583369	0.91003	-0.232517
A0A8I7B461	>tr|A0A8I7B461|A0A8I7B461_HORVV MICOS complex subunit MIC60 OS=Hordeum vulgare subsp. vulgare OX=112509 PE=3 SV=1	1.82302	1.81082	0.922709	0.993308	-0.0165607
A0A8I7B465	>tr|A0A8I7B465|A0A8I7B465_HORVV Sm domain-containing protein OS=Hordeum vulgare subsp. vulgare OX=112509 PE=3 SV=1	0.849901	0.818354	0.90039	0.962881	-0.0932883
A0A8I7B466	>tr|A0A8I7B466|A0A8I7B466_HORVV FRIGIDA-like protein OS=Hordeum vulgare subsp. vulgare OX=112509 PE=3 SV=1	0.686111	0.599619	0.67934	0.873938	-0.332324
A0A8I7B482	>tr|A0A8I7B482|A0A8I7B482_HORVV Phospholipase A1 OS=Hordeum vulgare subsp. vulgare OX=112509 PE=3 SV=1	0.545253	0.464684	0.442704	0.852236	-0.394342
A0A8I7B483	>tr|A0A8I7B483|A0A8I7B483_HORVV Acidic protein OS=Hordeum vulgare subsp. vulgare OX=112509 PE=4 SV=1	0.650006	0.534237	0.268422	0.821895	-0.483747
A0A8I7B4C5	>tr|A0A8I7B4C5|A0A8I7B4C5_HORVV 3-isopropylmalate dehydrogenase OS=Hordeum vulgare subsp. vulgare OX=112509 PE=3 SV=1	0.719865	0.821276	0.604096	1.14088	0.325049
A0A8I7B4D8	>tr|A0A8I7B4D8|A0A8I7B4D8_HORVV SGTA homodimerisation domain-containing protein OS=Hordeum vulgare subsp. vulgare OX=112509 PE=4 SV=1	0.793785	0.642035	0.47567	0.808827	-0.523276
A0A8I7B4F1	>tr|A0A8I7B4F1|A0A8I7B4F1_HORVV Peptidyl-prolyl cis-trans isomerase OS=Hordeum vulgare subsp. vulgare OX=112509 PE=4 SV=1	3.01777	2.4322	0.0142783	0.805961	-0.532031
A0A8I7B4M5	>tr|A0A8I7B4M5|A0A8I7B4M5_HORVV SHSP domain-containing protein OS=Hordeum vulgare subsp. vulgare OX=112509 PE=3 SV=1	41.6067	37.4806	0.343605	0.90083	-0.257576
A0A8I7B4T0	>tr|A0A8I7B4T0|A0A8I7B4T0_HORVV E1 ubiquitin-activating enzyme OS=Hordeum vulgare subsp. vulgare OX=112509 PE=3 SV=1	0.556521	0.477556	0.623252	0.85811	-0.377401
A0A8I7B4Y1	>tr|A0A8I7B4Y1|A0A8I7B4Y1_HORVV SHSP domain-containing protein OS=Hordeum vulgare subsp. vulgare OX=112509 PE=3 SV=1	39.9403	37.5996	0.637239	0.941395	-0.148945
A0A8I7B4Y6	>tr|A0A8I7B4Y6|A0A8I7B4Y6_HORVV Cell wall hydroxyproline-rich glycoprotein OS=Hordeum vulgare subsp. vulgare OX=112509 PE=4 SV=1	0.809542	0.491154	0.313826	0.606706	-1.23244
A0A8I7B504	>tr|A0A8I7B504|A0A8I7B504_HORVV Cell number regulator 8 OS=Hordeum vulgare subsp. vulgare OX=112509 PE=4 SV=1	1.22169	1.06964	0.815741	0.875542	-0.327801
A0A8I7B530	>tr|A0A8I7B530|A0A8I7B530_HORVV Reticulon-like protein OS=Hordeum vulgare subsp. vulgare OX=112509 PE=4 SV=1	0.469285	0.359658	0.282777	0.766396	-0.656176
A0A8I7B532	>tr|A0A8I7B532|A0A8I7B532_HORVV Eukaryotic translation initiation factor 3 subunit L OS=Hordeum vulgare subsp. vulgare OX=112509 PE=3 SV=1	1.46675	1.49898	0.972336	1.02197	0.053605
A0A8I7B541	>tr|A0A8I7B541|A0A8I7B541_HORVV Single-stranded DNA binding protein Ssb-like OB fold domain-containing protein OS=Hordeum vulgare subsp. vulgare OX=112509 PE=4 SV=1	4.4727	3.93326	0.0175282	0.879393	-0.316977
A0A8I7B571	>tr|A0A8I7B571|A0A8I7B571_HORVV MPN domain-containing protein OS=Hordeum vulgare subsp. vulgare OX=112509 PE=4 SV=1	0.70765	0.671591	0.653927	0.949045	-0.128985
A0A8I7B598	>tr|A0A8I7B598|A0A8I7B598_HORVV NADH-ubiquinone oxidoreductase 21kDa subunit N-terminal domain-containing protein OS=Hordeum vulgare subsp. vulgare OX=112509 PE=4 SV=1	1.7199	1.60451	0.639213	0.932909	-0.171278
A0A8I7B5B6	>tr|A0A8I7B5B6|A0A8I7B5B6_HORVV RRM domain-containing protein OS=Hordeum vulgare subsp. vulgare OX=112509 PE=4 SV=1	0.537236	0.462448	0.634051	0.860791	-0.369708
A0A8I7B5C4	>tr|A0A8I7B5C4|A0A8I7B5C4_HORVV FYVE-type domain-containing protein OS=Hordeum vulgare subsp. vulgare OX=112509 PE=4 SV=1	0.610172	0.590129	0.725082	0.967153	-0.082371
A0A8I7B5E5	>tr|A0A8I7B5E5|A0A8I7B5E5_HORVV Histone deacetylase domain-containing protein OS=Hordeum vulgare subsp. vulgare OX=112509 PE=4 SV=1	0.613939	0.592677	0.729675	0.965367	-0.0869299
A0A8I7B5G5	>tr|A0A8I7B5G5|A0A8I7B5G5_HORVV 5'-deoxynucleotidase OS=Hordeum vulgare subsp. vulgare OX=112509 PE=3 SV=1	1.77341	0.830623	0.506213	0.468377	-1.87064
A0A8I7B5H1	>tr|A0A8I7B5H1|A0A8I7B5H1_HORVV Malate dehydrogenase OS=Hordeum vulgare subsp. vulgare OX=112509 PE=3 SV=1	3.50051	3.15695	0.609783	0.901855	-0.254772
A0A8I7B5H4	>tr|A0A8I7B5H4|A0A8I7B5H4_HORVV SUMO-activating enzyme subunit OS=Hordeum vulgare subsp. vulgare OX=112509 PE=3 SV=1	0.543728	0.46025	0.58557	0.846471	-0.41108
A0A8I7B5H5	>tr|A0A8I7B5H5|A0A8I7B5H5_HORVV Transducin/WD40 repeat-like superfamily protein OS=Hordeum vulgare subsp. vulgare OX=112509 PE=4 SV=1	1.0862	1.01949	0.483776	0.938581	-0.156328
A0A8I7B5I5	>tr|A0A8I7B5I5|A0A8I7B5I5_HORVV Uncharacterized protein OS=Hordeum vulgare subsp. vulgare OX=112509 PE=3 SV=1	0.595261	0.797117	0.260547	1.3391	0.720164
A0A8I7B5I9	>tr|A0A8I7B5I9|A0A8I7B5I9_HORVV Beta-hexosaminidase OS=Hordeum vulgare subsp. vulgare OX=112509 PE=3 SV=1	0.911876	0.903023	0.928689	0.990291	-0.0240622
A0A8I7B5L2	>tr|A0A8I7B5L2|A0A8I7B5L2_HORVV IST1-like protein OS=Hordeum vulgare subsp. vulgare OX=112509 PE=4 SV=1	0.804418	0.591124	0.315083	0.734847	-0.759852
A0A8I7B5M8	>tr|A0A8I7B5M8|A0A8I7B5M8_HORVV Reticulon-like protein OS=Hordeum vulgare subsp. vulgare OX=112509 PE=4 SV=1	3.40261	2.78736	0.522069	0.819183	-0.491899
A0A8I7B5P1	>tr|A0A8I7B5P1|A0A8I7B5P1_HORVV cytidine deaminase OS=Hordeum vulgare subsp. vulgare OX=112509 PE=3 SV=1	1.13593	0.971724	0.703184	0.855445	-0.385073
A0A8I7B5R8	>tr|A0A8I7B5R8|A0A8I7B5R8_HORVV Protein FLX-like 1 OS=Hordeum vulgare subsp. vulgare OX=112509 PE=3 SV=1	1.95454	1.67911	0.664433	0.859081	-0.374612
A0A8I7B5T8	>tr|A0A8I7B5T8|A0A8I7B5T8_HORVV ATP synthase F1 complex delta/epsilon subunit N-terminal domain-containing protein OS=Hordeum vulgare subsp. vulgare OX=112509 PE=3 SV=1	6.26432	5.82033	0.608629	0.929125	-0.181304
A0A8I7B5U1	>tr|A0A8I7B5U1|A0A8I7B5U1_HORVV Calcyclin-binding protein OS=Hordeum vulgare subsp. vulgare OX=112509 PE=4 SV=1	2.848	2.96105	0.629977	1.03969	0.096004
A0A8I7B5W4	>tr|A0A8I7B5W4|A0A8I7B5W4_HORVV MD-2-related lipid-recognition domain-containing protein OS=Hordeum vulgare subsp. vulgare OX=112509 PE=4 SV=1	0.895786	1.0048	0.457366	1.1217	0.283245
A0A8I7B5Y5	>tr|A0A8I7B5Y5|A0A8I7B5Y5_HORVV Sugar phosphate transporter domain-containing protein OS=Hordeum vulgare subsp. vulgare OX=112509 PE=4 SV=1	0.634589	0.681998	0.710597	1.07471	0.177697
A0A8I7B5Y7	>tr|A0A8I7B5Y7|A0A8I7B5Y7_HORVV Tubulin beta chain OS=Hordeum vulgare subsp. vulgare OX=112509 PE=3 SV=1	5.53155	4.56517	0.155812	0.825296	-0.473564
A0A8I7B601	>tr|A0A8I7B601|A0A8I7B601_HORVV PCI domain-containing protein OS=Hordeum vulgare subsp. vulgare OX=112509 PE=3 SV=1	0.667222	0.682353	0.927104	1.02268	0.0553047
A0A8I7B612	>tr|A0A8I7B612|A0A8I7B612_HORVV SnRK1-interacting protein 1 OS=Hordeum vulgare subsp. vulgare OX=112509 PE=4 SV=1	2.0613	1.92393	0.90427	0.933359	-0.170089
A0A8I7B616	>tr|A0A8I7B616|A0A8I7B616_HORVV ribose-5-phosphate isomerase OS=Hordeum vulgare subsp. vulgare OX=112509 PE=3 SV=1	1.04005	0.662277	0.447475	0.636772	-1.11315
A0A8I7B626	>tr|A0A8I7B626|A0A8I7B626_HORVV VAMP-like protein YKT61 OS=Hordeum vulgare subsp. vulgare OX=112509 PE=3 SV=1	1.28574	1.14436	0.647892	0.890036	-0.287308
A0A8I7B647	>tr|A0A8I7B647|A0A8I7B647_HORVV Uncharacterized protein OS=Hordeum vulgare subsp. vulgare OX=112509 PE=3 SV=1	2.6814	7.64754	0.229091	2.85207	2.5848
A0A8I7B654	>tr|A0A8I7B654|A0A8I7B654_HORVV Signal peptidase complex subunit 1 OS=Hordeum vulgare subsp. vulgare OX=112509 PE=3 SV=1	0.4401	0.576424	0.714967	1.30976	0.665514
A0A8I7B658	>tr|A0A8I7B658|A0A8I7B658_HORVV Ureidoglycolate hydrolase OS=Hordeum vulgare subsp. vulgare OX=112509 PE=4 SV=1	1.01345	0.722413	0.3599	0.712822	-0.8349
A0A8I7B659	>tr|A0A8I7B659|A0A8I7B659_HORVV BAG family molecular chaperone regulator 4 OS=Hordeum vulgare subsp. vulgare OX=112509 PE=4 SV=1	1.72235	1.55469	0.684301	0.902654	-0.252589
A0A8I7B6C3	>tr|A0A8I7B6C3|A0A8I7B6C3_HORVV Conserved oligomeric Golgi complex subunit 4 OS=Hordeum vulgare subsp. vulgare OX=112509 PE=3 SV=1	0.780956	0.693016	0.785562	0.887394	-0.294639
A0A8I7B6F0	>tr|A0A8I7B6F0|A0A8I7B6F0_HORVV Oleosin OS=Hordeum vulgare subsp. vulgare OX=112509 PE=4 SV=1	2.01931	1.16003	0.18692	0.57447	-1.36709
A0A8I7B6G8	>tr|A0A8I7B6G8|A0A8I7B6G8_HORVV Uncharacterized protein OS=Hordeum vulgare subsp. vulgare OX=112509 PE=4 SV=1	0.737517	0.691354	0.343329	0.937407	-0.159416
A0A8I7B6H8	>tr|A0A8I7B6H8|A0A8I7B6H8_HORVV NAD-dependent epimerase/dehydratase domain-containing protein OS=Hordeum vulgare subsp. vulgare OX=112509 PE=4 SV=1	0.598326	0.381838	0.161779	0.638177	-1.10771
A0A8I7B6J3	>tr|A0A8I7B6J3|A0A8I7B6J3_HORVV PCI domain-containing protein OS=Hordeum vulgare subsp. vulgare OX=112509 PE=3 SV=1	1.54901	1.0598	0.428734	0.684178	-0.936054
A0A8I7B6M6	>tr|A0A8I7B6M6|A0A8I7B6M6_HORVV Transcription factor CBF/NF-Y/archaeal histone domain-containing protein OS=Hordeum vulgare subsp. vulgare OX=112509 PE=4 SV=1	1.39373	1.80661	0.62378	1.29624	0.639923
A0A8I7B6N5	>tr|A0A8I7B6N5|A0A8I7B6N5_HORVV Thaumatin-like protein OS=Hordeum vulgare subsp. vulgare OX=112509 PE=4 SV=1	3.25106	3.56578	0.579171	1.0968	0.227889
A0A8I7B6P3	>tr|A0A8I7B6P3|A0A8I7B6P3_HORVV Aldose 1-epimerase OS=Hordeum vulgare subsp. vulgare OX=112509 PE=3 SV=1	2.05418	2.10763	0.724296	1.02602	0.0633571
A0A8I7B6P8	>tr|A0A8I7B6P8|A0A8I7B6P8_HORVV Ribonuclease OS=Hordeum vulgare subsp. vulgare OX=112509 PE=4 SV=1	5.42776	5.35585	0.940612	0.986752	-0.0328931
A0A8I7B6Q0	>tr|A0A8I7B6Q0|A0A8I7B6Q0_HORVV Germin-like protein OS=Hordeum vulgare subsp. vulgare OX=112509 PE=3 SV=1	22.5582	20.4086	0.497882	0.904708	-0.246983
A0A8I7B6R1	>tr|A0A8I7B6R1|A0A8I7B6R1_HORVV Coatomer subunit alpha OS=Hordeum vulgare subsp. vulgare OX=112509 PE=4 SV=1	0.905927	0.859977	0.875489	0.949279	-0.128378
A0A8I7B6R2	>tr|A0A8I7B6R2|A0A8I7B6R2_HORVV UBX domain-containing protein OS=Hordeum vulgare subsp. vulgare OX=112509 PE=4 SV=1	4.62184	3.70746	0.172117	0.802162	-0.543685
A0A8I7B6U7	>tr|A0A8I7B6U7|A0A8I7B6U7_HORVV Serpin domain-containing protein OS=Hordeum vulgare subsp. vulgare OX=112509 PE=3 SV=1	46.2357	46.6213	0.956307	1.00834	0.020485
A0A8I7B6V2	>tr|A0A8I7B6V2|A0A8I7B6V2_HORVV Dehydrogenase/reductase SDR family member 7 OS=Hordeum vulgare subsp. vulgare OX=112509 PE=4 SV=1	0.677724	0.883576	0.539045	1.30374	0.654156
A0A8I7B6V7	>tr|A0A8I7B6V7|A0A8I7B6V7_HORVV PDZ domain-containing protein OS=Hordeum vulgare subsp. vulgare OX=112509 PE=3 SV=1	0.882022	1.12003	0.0899685	1.26985	0.589193
A0A8I7B722	>tr|A0A8I7B722|A0A8I7B722_HORVV chitinase OS=Hordeum vulgare subsp. vulgare OX=112509 PE=4 SV=1	0.567205	0.448459	0.340548	0.790647	-0.579343
A0A8I7B760	>tr|A0A8I7B760|A0A8I7B760_HORVV ER membrane protein complex subunit 4 OS=Hordeum vulgare subsp. vulgare OX=112509 PE=3 SV=1	0.775369	0.55413	0.142896	0.714667	-0.828528
A0A8I7B781	>tr|A0A8I7B781|A0A8I7B781_HORVV ABC transporter domain-containing protein OS=Hordeum vulgare subsp. vulgare OX=112509 PE=4 SV=1	1.64063	1.49383	0.712026	0.910526	-0.231174
A0A8I7B7A8	>tr|A0A8I7B7A8|A0A8I7B7A8_HORVV S1 motif domain-containing protein OS=Hordeum vulgare subsp. vulgare OX=112509 PE=3 SV=1	1.34324	1.22872	0.644943	0.914744	-0.219774
A0A8I7B7E0	>tr|A0A8I7B7E0|A0A8I7B7E0_HORVV J domain-containing protein OS=Hordeum vulgare subsp. vulgare OX=112509 PE=4 SV=1	2.20128	1.17557	0.389018	0.534039	-1.54708
A0A8I7B7H8	>tr|A0A8I7B7H8|A0A8I7B7H8_HORVV Mitochondrial-processing peptidase subunit beta, mitochondrial OS=Hordeum vulgare subsp. vulgare OX=112509 PE=3 SV=1	4.02295	2.90359	0.175783	0.721755	-0.804185
A0A8I7B7P9	>tr|A0A8I7B7P9|A0A8I7B7P9_HORVV Complex 1 LYR protein domain-containing protein OS=Hordeum vulgare subsp. vulgare OX=112509 PE=4 SV=1	0.777196	0.687727	0.374938	0.884882	-0.301632
A0A8I7B7U0	>tr|A0A8I7B7U0|A0A8I7B7U0_HORVV SRP54-type proteins GTP-binding domain-containing protein OS=Hordeum vulgare subsp. vulgare OX=112509 PE=3 SV=1	0.567538	0.527435	0.872484	0.929339	-0.180735
A0A8I7B7V1	>tr|A0A8I7B7V1|A0A8I7B7V1_HORVV Bifunctional inhibitor/plant lipid transfer protein/seed storage helical domain-containing protein OS=Hordeum vulgare subsp. vulgare OX=112509 PE=3 SV=1	13.9647	9.98156	0.113953	0.714769	-0.828174
A0A8I7B7Y2	>tr|A0A8I7B7Y2|A0A8I7B7Y2_HORVV BP28 C-terminal domain-containing protein OS=Hordeum vulgare subsp. vulgare OX=112509 PE=3 SV=1	0.656813	0.624215	0.744116	0.950369	-0.125546
A0A8I7B7Z0	>tr|A0A8I7B7Z0|A0A8I7B7Z0_HORVV PI-PLC X domain-containing protein OS=Hordeum vulgare subsp. vulgare OX=112509 PE=4 SV=1	0.919564	1.33256	0.0391689	1.44912	0.914891
A0A8I7B829	>tr|A0A8I7B829|A0A8I7B829_HORVV Autophagy-related protein OS=Hordeum vulgare subsp. vulgare OX=112509 PE=3 SV=1	2.95005	2.01464	0.434576	0.682917	-0.940605
A0A8I7B831	>tr|A0A8I7B831|A0A8I7B831_HORVV protein-disulfide reductase OS=Hordeum vulgare subsp. vulgare OX=112509 PE=3 SV=1	4.55482	3.87355	0.265516	0.85043	-0.399574
A0A8I7B897	>tr|A0A8I7B897|A0A8I7B897_HORVV Peptidase M20 dimerisation domain-containing protein OS=Hordeum vulgare subsp. vulgare OX=112509 PE=4 SV=1	3.02237	1.82182	0.566158	0.602779	-1.24845
A0A8I7B8A2	>tr|A0A8I7B8A2|A0A8I7B8A2_HORVV 4-hydroxy-tetrahydrodipicolinate synthase OS=Hordeum vulgare subsp. vulgare OX=112509 PE=3 SV=1	1.3472	1.46989	0.483908	1.09107	0.214966
A0A8I7B8C7	>tr|A0A8I7B8C7|A0A8I7B8C7_HORVV AAA+ ATPase domain-containing protein OS=Hordeum vulgare subsp. vulgare OX=112509 PE=3 SV=1	1.01305	0.934218	0.34898	0.922186	-0.199792
A0A8I7B8E8	>tr|A0A8I7B8E8|A0A8I7B8E8_HORVV DNA replication licensing factor MCM7 OS=Hordeum vulgare subsp. vulgare OX=112509 GN=MCM7 PE=3 SV=1	1.20189	1.12445	0.615162	0.935573	-0.164246	MCM7
A0A8I7B8E9	>tr|A0A8I7B8E9|A0A8I7B8E9_HORVV Superoxide dismutase OS=Hordeum vulgare subsp. vulgare OX=112509 PE=3 SV=1	14.3578	14.0854	0.879835	0.981025	-0.0472481
A0A8I7B8G7	>tr|A0A8I7B8G7|A0A8I7B8G7_HORVV Uncharacterized protein OS=Hordeum vulgare subsp. vulgare OX=112509 PE=4 SV=1	0.216598	0.514657	0.0049379	2.3761	2.13448
A0A8I7B8K2	>tr|A0A8I7B8K2|A0A8I7B8K2_HORVV Exocyst complex component Sec10 OS=Hordeum vulgare subsp. vulgare OX=112509 PE=3 SV=1	0.681816	0.53585	0.537236	0.785916	-0.594145
A0A8I7B8L0	>tr|A0A8I7B8L0|A0A8I7B8L0_HORVV Dihydrolipoamide acetyltransferase component of pyruvate dehydrogenase complex OS=Hordeum vulgare subsp. vulgare OX=112509 PE=3 SV=1	1.012	0.865594	0.639492	0.85533	-0.385403
A0A8I7B8L7	>tr|A0A8I7B8L7|A0A8I7B8L7_HORVV WH1 domain-containing protein OS=Hordeum vulgare subsp. vulgare OX=112509 PE=3 SV=1	0.815122	0.98365	0.381423	1.20675	0.463498
A0A8I7B8P4	>tr|A0A8I7B8P4|A0A8I7B8P4_HORVV Beta-galactosidase OS=Hordeum vulgare subsp. vulgare OX=112509 PE=3 SV=1	0.91276	1.34961	0.222998	1.47861	0.964573
A0A8I7B8Q3	>tr|A0A8I7B8Q3|A0A8I7B8Q3_HORVV Knottin scorpion toxin-like domain-containing protein OS=Hordeum vulgare subsp. vulgare OX=112509 PE=4 SV=1	0.614427	0.46508	0.488644	0.756933	-0.686818
A0A8I7B8T8	>tr|A0A8I7B8T8|A0A8I7B8T8_HORVV Acetyl-CoA C-acetyltransferase OS=Hordeum vulgare subsp. vulgare OX=112509 PE=3 SV=1	2.16607	2.58112	0.420563	1.19162	0.432368
A0A8I7B8U4	>tr|A0A8I7B8U4|A0A8I7B8U4_HORVV Uncharacterized protein OS=Hordeum vulgare subsp. vulgare OX=112509 PE=3 SV=1	0.563329	0.450637	0.237218	0.799953	-0.550484
A0A8I7B8Y1	>tr|A0A8I7B8Y1|A0A8I7B8Y1_HORVV Uncharacterized protein OS=Hordeum vulgare subsp. vulgare OX=112509 PE=3 SV=1	1.70455	1.54574	0.503923	0.906833	-0.241196
A0A8I7B903	>tr|A0A8I7B903|A0A8I7B903_HORVV PB1 domain-containing protein OS=Hordeum vulgare subsp. vulgare OX=112509 PE=4 SV=1	4.24603	3.45346	0.335084	0.813337	-0.509563
A0A8I7B935	>tr|A0A8I7B935|A0A8I7B935_HORVV indole-3-pyruvate monooxygenase OS=Hordeum vulgare subsp. vulgare OX=112509 PE=4 SV=1	0.778368	0.682654	0.0570407	0.877032	-0.323608
A0A8I7B938	>tr|A0A8I7B938|A0A8I7B938_HORVV AB hydrolase-1 domain-containing protein OS=Hordeum vulgare subsp. vulgare OX=112509 PE=4 SV=1	0.670269	0.734271	0.607514	1.09549	0.224924
A0A8I7B965	>tr|A0A8I7B965|A0A8I7B965_HORVV PDZ domain-containing protein OS=Hordeum vulgare subsp. vulgare OX=112509 PE=3 SV=1	4.24091	3.66286	0.346419	0.863698	-0.361393
A0A8I7B966	>tr|A0A8I7B966|A0A8I7B966_HORVV RNA helicase OS=Hordeum vulgare subsp. vulgare OX=112509 PE=3 SV=1	0.659957	0.55851	0.0668736	0.846282	-0.411632
A0A8I7B995	>tr|A0A8I7B995|A0A8I7B995_HORVV SHSP domain-containing protein OS=Hordeum vulgare subsp. vulgare OX=112509 PE=3 SV=1	5.91795	5.19197	0.421512	0.877326	-0.322782
A0A8I7B999	>tr|A0A8I7B999|A0A8I7B999_HORVV Choline kinase 2 OS=Hordeum vulgare subsp. vulgare OX=112509 PE=3 SV=1	1.19063	1.59653	0.0874609	1.34092	0.7235
A0A8I7B9C0	>tr|A0A8I7B9C0|A0A8I7B9C0_HORVV Protein LTV1 homolog OS=Hordeum vulgare subsp. vulgare OX=112509 PE=3 SV=1	0.438873	0.379899	0.680757	0.865624	-0.3559
A0A8I7B9C1	>tr|A0A8I7B9C1|A0A8I7B9C1_HORVV Histone-lysine N-methyltransferase OS=Hordeum vulgare subsp. vulgare OX=112509 PE=4 SV=1	1.18499	1.23886	0.592321	1.04546	0.109654
A0A8I7B9F0	>tr|A0A8I7B9F0|A0A8I7B9F0_HORVV FAD dependent oxidoreductase domain-containing protein OS=Hordeum vulgare subsp. vulgare OX=112509 PE=4 SV=1	2.25981	1.79966	0.313855	0.796378	-0.561532
A0A8I7B9G1	>tr|A0A8I7B9G1|A0A8I7B9G1_HORVV Proteasome subunit beta OS=Hordeum vulgare subsp. vulgare OX=112509 PE=3 SV=1	7.22255	8.48739	0.703377	1.17512	0.397995
A0A8I7B9K7	>tr|A0A8I7B9K7|A0A8I7B9K7_HORVV Plasma membrane-associated cation-binding protein 1 OS=Hordeum vulgare subsp. vulgare OX=112509 PE=4 SV=1	1.34383	2.73229	0.310773	2.03322	1.75014
A0A8I7B9L2	>tr|A0A8I7B9L2|A0A8I7B9L2_HORVV Thioredoxin-like fold domain-containing protein OS=Hordeum vulgare subsp. vulgare OX=112509 PE=4 SV=1	0.552332	0.656684	0.563993	1.18893	0.426804
A0A8I7B9Q5	>tr|A0A8I7B9Q5|A0A8I7B9Q5_HORVV histidinol-phosphatase OS=Hordeum vulgare subsp. vulgare OX=112509 PE=3 SV=1	0.989456	1.10688	0.714449	1.11867	0.276576
A0A8I7B9W3	>tr|A0A8I7B9W3|A0A8I7B9W3_HORVV DNA replication licensing factor MCM4 OS=Hordeum vulgare subsp. vulgare OX=112509 PE=3 SV=1	0.636768	0.706962	0.620127	1.11024	0.257906
A0A8I7B9Z9	>tr|A0A8I7B9Z9|A0A8I7B9Z9_HORVV Glutathione S-transferase OS=Hordeum vulgare subsp. vulgare OX=112509 PE=3 SV=1	4.21804	3.89573	0.738603	0.923587	-0.196048
A0A8I7BA12	>tr|A0A8I7BA12|A0A8I7BA12_HORVV Cupin type-1 domain-containing protein OS=Hordeum vulgare subsp. vulgare OX=112509 PE=4 SV=1	53.7871	47.388	0.599899	0.881029	-0.312394
A0A8I7BA39	>tr|A0A8I7BA39|A0A8I7BA39_HORVV Thioredoxin domain-containing protein OS=Hordeum vulgare subsp. vulgare OX=112509 PE=4 SV=1	2.11451	2.11379	0.998594	0.999662	-0.000833347
A0A8I7BA59	>tr|A0A8I7BA59|A0A8I7BA59_HORVV Nudix hydrolase domain-containing protein OS=Hordeum vulgare subsp. vulgare OX=112509 PE=3 SV=1	1.08496	0.790835	0.6017	0.728907	-0.779867
A0A8I7BA67	>tr|A0A8I7BA67|A0A8I7BA67_HORVV Serine/threonine-protein phosphatase OS=Hordeum vulgare subsp. vulgare OX=112509 PE=3 SV=1	0.659255	0.501481	0.616233	0.760679	-0.674641
A0A8I7BA83	>tr|A0A8I7BA83|A0A8I7BA83_HORVV DNA topoisomerase (ATP-hydrolyzing) OS=Hordeum vulgare subsp. vulgare OX=112509 PE=3 SV=1	1.24932	1.11043	0.144213	0.888826	-0.290662
A0A8I7BA84	>tr|A0A8I7BA84|A0A8I7BA84_HORVV Histone-binding protein RBBP4 N-terminal domain-containing protein OS=Hordeum vulgare subsp. vulgare OX=112509 PE=3 SV=1	2.31848	2.56875	0.649007	1.10795	0.252818
A0A8I7BAB0	>tr|A0A8I7BAB0|A0A8I7BAB0_HORVV 3-hydroxyisobutyrate dehydrogenase-like 1, mitochondrial OS=Hordeum vulgare subsp. vulgare OX=112509 PE=4 SV=1	1.01118	0.810894	0.305702	0.801928	-0.544404
A0A8I7BAB5	>tr|A0A8I7BAB5|A0A8I7BAB5_HORVV Expansin OS=Hordeum vulgare subsp. vulgare OX=112509 PE=3 SV=1	0.592205	0.604572	0.887815	1.02088	0.0509757
A0A8I7BAB8	>tr|A0A8I7BAB8|A0A8I7BAB8_HORVV S-adenosylmethionine transporter OS=Hordeum vulgare subsp. vulgare OX=112509 PE=3 SV=1	0.558958	0.600378	0.799037	1.0741	0.176304
A0A8I7BAE5	>tr|A0A8I7BAE5|A0A8I7BAE5_HORVV Electron transfer flavoprotein subunit alpha OS=Hordeum vulgare subsp. vulgare OX=112509 PE=3 SV=1	2.38672	2.04955	0.531646	0.858731	-0.375617
A0A8I7BAE6	>tr|A0A8I7BAE6|A0A8I7BAE6_HORVV Protein CROWDED NUCLEI 4 OS=Hordeum vulgare subsp. vulgare OX=112509 PE=3 SV=1	0.720861	0.605126	0.563516	0.839448	-0.43163
A0A8I7BAE7	>tr|A0A8I7BAE7|A0A8I7BAE7_HORVV Peptidase M20 dimerisation domain-containing protein OS=Hordeum vulgare subsp. vulgare OX=112509 PE=3 SV=1	0.726461	0.650702	0.733549	0.895714	-0.271623
A0A8I7BAF3	>tr|A0A8I7BAF3|A0A8I7BAF3_HORVV E3 ubiquitin-protein ligase RNF170 OS=Hordeum vulgare subsp. vulgare OX=112509 PE=4 SV=1	0.266926	0.380616	0.265542	1.42593	0.875098
A0A8I7BAJ6	>tr|A0A8I7BAJ6|A0A8I7BAJ6_HORVV Protein kinase domain-containing protein OS=Hordeum vulgare subsp. vulgare OX=112509 PE=4 SV=1	1.05242	0.735978	0.425325	0.699323	-0.882056
A0A8I7BAJ8	>tr|A0A8I7BAJ8|A0A8I7BAJ8_HORVV tRNA-binding domain-containing protein OS=Hordeum vulgare subsp. vulgare OX=112509 PE=4 SV=1	1.60037	2.64495	0.0872361	1.65271	1.23912
A0A8I7BAK6	>tr|A0A8I7BAK6|A0A8I7BAK6_HORVV protein-serine/threonine phosphatase OS=Hordeum vulgare subsp. vulgare OX=112509 PE=4 SV=1	0.78019	0.675601	0.193168	0.865944	-0.354988
A0A8I7BAN6	>tr|A0A8I7BAN6|A0A8I7BAN6_HORVV Uncharacterized protein OS=Hordeum vulgare subsp. vulgare OX=112509 PE=4 SV=1	0.875096	0.717445	0.117597	0.819847	-0.4899
A0A8I7BAP0	>tr|A0A8I7BAP0|A0A8I7BAP0_HORVV Heat shock cognate 70 kDa protein OS=Hordeum vulgare subsp. vulgare OX=112509 PE=3 SV=1	2.78223	1.9949	0.208459	0.717016	-0.820433
A0A8I7BAP3	>tr|A0A8I7BAP3|A0A8I7BAP3_HORVV SLH domain-containing protein OS=Hordeum vulgare subsp. vulgare OX=112509 PE=4 SV=1	1.76297	0.972399	0.290178	0.551568	-1.46743
A0A8I7BAT0	>tr|A0A8I7BAT0|A0A8I7BAT0_HORVV Pectinesterase OS=Hordeum vulgare subsp. vulgare OX=112509 PE=4 SV=1	0.772004	0.721328	0.693032	0.934357	-0.167453
A0A8I7BAT1	>tr|A0A8I7BAT1|A0A8I7BAT1_HORVV Peptidase A1 domain-containing protein OS=Hordeum vulgare subsp. vulgare OX=112509 PE=3 SV=1	0.544414	0.377338	0.480777	0.693108	-0.904071
A0A8I7BAT3	>tr|A0A8I7BAT3|A0A8I7BAT3_HORVV Uncharacterized protein OS=Hordeum vulgare subsp. vulgare OX=112509 PE=3 SV=1	1.67784	2.1667	0.790221	1.29137	0.630636
A0A8I7BAU1	>tr|A0A8I7BAU1|A0A8I7BAU1_HORVV Dolichyl-diphosphooligosaccharide--protein glycosyltransferase subunit 2 OS=Hordeum vulgare subsp. vulgare OX=112509 PE=3 SV=1	2.48703	2.29211	0.444749	0.921623	-0.201297
A0A8I7BAU3	>tr|A0A8I7BAU3|A0A8I7BAU3_HORVV Uncharacterized protein OS=Hordeum vulgare subsp. vulgare OX=112509 PE=4 SV=1	0.795471	0.616491	0.291375	0.775002	-0.628636
A0A8I7BAV6	>tr|A0A8I7BAV6|A0A8I7BAV6_HORVV Dynamin-related protein 3A OS=Hordeum vulgare subsp. vulgare OX=112509 PE=3 SV=1	0.809101	0.86982	0.823869	1.07505	0.178471
A0A8I7BAV7	>tr|A0A8I7BAV7|A0A8I7BAV7_HORVV MalT-like TPR region domain-containing protein OS=Hordeum vulgare subsp. vulgare OX=112509 PE=4 SV=1	0.689864	0.735681	0.72943	1.06642	0.158592
A0A8I7BB18	>tr|A0A8I7BB18|A0A8I7BB18_HORVV RRM domain-containing protein OS=Hordeum vulgare subsp. vulgare OX=112509 PE=4 SV=1	0.553009	0.494294	0.704977	0.893826	-0.276828
A0A8I7BB49	>tr|A0A8I7BB49|A0A8I7BB49_HORVV L-lactate dehydrogenase OS=Hordeum vulgare subsp. vulgare OX=112509 PE=3 SV=1	0.593181	0.763691	0.277614	1.28745	0.623146
A0A8I7BB75	>tr|A0A8I7BB75|A0A8I7BB75_HORVV Glycosyltransferase OS=Hordeum vulgare subsp. vulgare OX=112509 PE=3 SV=1	0.355335	0.456999	0.543039	1.28611	0.620572
A0A8I7BB92	>tr|A0A8I7BB92|A0A8I7BB92_HORVV L-arabinokinase OS=Hordeum vulgare subsp. vulgare OX=112509 PE=4 SV=1	0.865531	0.805128	0.552207	0.930213	-0.178417
A0A8I7BBD6	>tr|A0A8I7BBD6|A0A8I7BBD6_HORVV Ubiquitin thioesterase OTU OS=Hordeum vulgare subsp. vulgare OX=112509 PE=4 SV=1	2.28452	1.59306	0.23382	0.697328	-0.889102
A0A8I7BBE4	>tr|A0A8I7BBE4|A0A8I7BBE4_HORVV PWWP domain-containing protein OS=Hordeum vulgare subsp. vulgare OX=112509 PE=4 SV=1	0.771014	0.642615	0.558983	0.833467	-0.449264
A0A8I7BBH0	>tr|A0A8I7BBH0|A0A8I7BBH0_HORVV Deoxyuridine 5'-triphosphate nucleotidohydrolase OS=Hordeum vulgare subsp. vulgare OX=112509 PE=3 SV=1	3.44598	2.42657	0.192992	0.704175	-0.865003
A0A8I7BBJ0	>tr|A0A8I7BBJ0|A0A8I7BBJ0_HORVV Pinin/SDK/MemA protein domain-containing protein OS=Hordeum vulgare subsp. vulgare OX=112509 PE=3 SV=1	1.14684	1.39407	0.755673	1.21557	0.481448
A0A8I7BBJ7	>tr|A0A8I7BBJ7|A0A8I7BBJ7_HORVV DNA damage-inducible protein 1 OS=Hordeum vulgare subsp. vulgare OX=112509 PE=3 SV=1	1.0806	0.925416	0.402947	0.85639	-0.382351
[truncated: 1,950 more rows]

## Sheet: CK-UVAB
Accession	Description	MEAN CK	MEAN UVAB	P-VALUE	FOLD CHANGE	LOG1.5_FOLDCHANGE	GeneName
A0A023ZT67	>tr|A0A023ZT67|A0A023ZT67_HORVV Putative syntaxin-related protein OS=Hordeum vulgare subsp. vulgare OX=112509 PE=2 SV=1	1.19039	0.546659	0.327429	0.459225	-1.91931
A0A060ILL2	>tr|A0A060ILL2|A0A060ILL2_HORVS Limit dextrinase inhibitor (Fragment) OS=Hordeum vulgare subsp. spontaneum OX=77009 GN=LDI PE=3 SV=1	3.5821	2.64448	0.620573	0.738248	-0.748463	LDI
A0A067YHQ4	>tr|A0A067YHQ4|A0A067YHQ4_HORVS Dehydrin 9 (Fragment) OS=Hordeum vulgare subsp. spontaneum OX=77009 GN=dhn9 PE=4 SV=1	1.83066	0.565332	0.043776	0.308813	-2.89796	dhn9
A0A068F4L9	>tr|A0A068F4L9|A0A068F4L9_HORVU Chalcone-flavonone isomerase family protein OS=Hordeum vulgare OX=4513 GN=CHI PE=2 SV=1	2.41458	1.96877	0.431949	0.815367	-0.503415	CHI
A0A0D5CPA7	>tr|A0A0D5CPA7|A0A0D5CPA7_HORVV Putative cellulose synthase-like protein D2 OS=Hordeum vulgare subsp. vulgare OX=112509 GN=CslD2 PE=4 SV=1	0.752849	0.914877	0.383403	1.21522	0.480745	CslD2
A0A0K0VKK1	>tr|A0A0K0VKK1|A0A0K0VKK1_HORVU CSP1 OS=Hordeum vulgare OX=4513 GN=CSP1 PE=2 SV=1	7.95228	3.82398	0.166626	0.480866	-1.80575	CSP1
A0A0K0YH42	>tr|A0A0K0YH42|A0A0K0YH42_HORVS NAD(P)H dehydrogenase subunit H OS=Hordeum vulgare subsp. spontaneum OX=77009 GN=nad7 PE=3 SV=1	0.759618	0.753631	0.965097	0.992119	-0.0195149	nad7
A0A0N7IS25	>tr|A0A0N7IS25|A0A0N7IS25_HORVU Plasma membrane associated protein-4 OS=Hordeum vulgare OX=4513 GN=PM19-4 PE=4 SV=1	1.35965	0.81282	0.0541466	0.597816	-1.26885	PM19-4
A0A0S1LGH4	>tr|A0A0S1LGH4|A0A0S1LGH4_HORVS Dehydrin3 OS=Hordeum vulgare subsp. spontaneum OX=77009 GN=Dhn3 PE=3 SV=1	11.9342	5.30285	0.0711736	0.444341	-2.00057	Dhn3
A0A0U2GJJ3	>tr|A0A0U2GJJ3|A0A0U2GJJ3_HORVU UDP-arabinopyranose mutase OS=Hordeum vulgare OX=4513 PE=2 SV=1	3.57509	7.19082	0.180205	2.01137	1.72349
A0A0U2GJL1	>tr|A0A0U2GJL1|A0A0U2GJL1_HORVU UDP-arabinopyranose mutase OS=Hordeum vulgare OX=4513 PE=2 SV=1	6.84505	9.79897	0.254751	1.43154	0.884792
A0A0U2GJM5	>tr|A0A0U2GJM5|A0A0U2GJM5_HORVU UDP-arabinopyranose mutase OS=Hordeum vulgare OX=4513 PE=3 SV=1	1.80981	1.5518	0.536429	0.857439	-0.37933
A0A0U2IGV8	>tr|A0A0U2IGV8|A0A0U2IGV8_HORVU Ribosomal protein S16 OS=Hordeum vulgare OX=4513 PE=2 SV=1	1.94902	3.64259	0.216889	1.86894	1.54235
A0A0U2KWW3	>tr|A0A0U2KWW3|A0A0U2KWW3_HORVU malate dehydrogenase OS=Hordeum vulgare OX=4513 GN=MDH PE=2 SV=1	4.8143	3.80072	0.0916812	0.789465	-0.583033	MDH
A0A0U2L8B1	>tr|A0A0U2L8B1|A0A0U2L8B1_HORVU Eukaryotic elongation factor 1 gamma OS=Hordeum vulgare OX=4513 GN=eEF1G PE=2 SV=1	13.6064	16.7515	0.412403	1.23114	0.51285	eEF1G
A0A0U2LJC8	>tr|A0A0U2LJC8|A0A0U2LJC8_HORVU Nucleoside diphosphate kinase OS=Hordeum vulgare OX=4513 GN=NDPK PE=2 SV=1	30.1284	27.4173	0.675369	0.910016	-0.232555	NDPK
A0A0U2S9G2	>tr|A0A0U2S9G2|A0A0U2S9G2_HORVD Starch synthase, chloroplastic/amyloplastic OS=Hordeum vulgare var. distichon OX=1288821 PE=3 SV=1	3.13336	3.31832	0.838387	1.05903	0.141445
A0A0U5AE65	>tr|A0A0U5AE65|A0A0U5AE65_HORVV Lipoxygenase OS=Hordeum vulgare subsp. vulgare OX=112509 GN=Lox-1 PE=3 SV=1	5.68584	8.21559	0.397622	1.44492	0.907737	Lox-1
A0A142I888	>tr|A0A142I888|A0A142I888_HORVU Superoxide dismutase [Cu-Zn] OS=Hordeum vulgare OX=4513 GN=CSD1 PE=2 SV=1	21.8076	10.7806	0.0265071	0.494351	-1.73753	CSD1
A0A161G0W4	>tr|A0A161G0W4|A0A161G0W4_HORVU MCT-1 OS=Hordeum vulgare OX=4513 PE=2 SV=1	1.04197	1.29949	0.381369	1.24715	0.544709
A0A161G0Y0	>tr|A0A161G0Y0|A0A161G0Y0_HORVU Glycosyltransferases OS=Hordeum vulgare OX=4513 GN=GT43 PE=2 SV=1	1.80842	0.76487	0.165029	0.42295	-2.12226	GT43
A0A161G111	>tr|A0A161G111|A0A161G111_HORVU Protein disulfide isomerase like 5-1 OS=Hordeum vulgare OX=4513 GN=PDIL5-1 PE=2 SV=1	7.28029	6.02289	0.527163	0.827287	-0.467621	PDIL5-1
A0A172QFH3	>tr|A0A172QFH3|A0A172QFH3_HORVV Non-specific lipid-transfer protein OS=Hordeum vulgare subsp. vulgare OX=112509 GN=blt4.9 PE=2 SV=1	1.35498	0.679919	0.229886	0.501792	-1.70069	blt4.9
A0A191TDI3	>tr|A0A191TDI3|A0A191TDI3_HORVV ATP synthase subunit alpha OS=Hordeum vulgare subsp. vulgare OX=112509 GN=atp1 PE=3 SV=1	6.44164	5.78884	0.404181	0.898659	-0.263527	atp1
A0A191TDJ3	>tr|A0A191TDJ3|A0A191TDJ3_HORVV Cytochrome c oxidase subunit 2 OS=Hordeum vulgare subsp. vulgare OX=112509 GN=cox2 PE=3 SV=1	0.668365	0.931974	0.0196638	1.39441	0.819973	cox2
A0A191TDJ4	>tr|A0A191TDJ4|A0A191TDJ4_HORVV Cytochrome b OS=Hordeum vulgare subsp. vulgare OX=112509 GN=cob PE=3 SV=1	1.8212	2.91961	0.252276	1.60313	1.16399	cob
A0A191TDJ5	>tr|A0A191TDJ5|A0A191TDJ5_HORVV Cytochrome c oxidase subunit 1 OS=Hordeum vulgare subsp. vulgare OX=112509 GN=cox1 PE=3 SV=1	0.641604	0.650292	0.945801	1.01354	0.033172	cox1
A0A191TDL0	>tr|A0A191TDL0|A0A191TDL0_HORVV NADH-ubiquinone oxidoreductase chain 4 OS=Hordeum vulgare subsp. vulgare OX=112509 GN=nad4 PE=3 SV=1	0.503728	0.659485	0.413574	1.30921	0.664476	nad4
A0A1C9ZNW3	>tr|A0A1C9ZNW3|A0A1C9ZNW3_HORVS H(+)-transporting two-sector ATPase OS=Hordeum vulgare subsp. spontaneum OX=77009 GN=atp8 PE=3 SV=1	0.615318	0.497864	0.453254	0.809117	-0.522392	atp8
A0A1C9ZNZ0	>tr|A0A1C9ZNZ0|A0A1C9ZNZ0_HORVS NADH dehydrogenase subunit 9 OS=Hordeum vulgare subsp. spontaneum OX=77009 GN=nad9_1 PE=3 SV=1	1.07366	1.5754	0.197149	1.46732	0.945675	nad9_1
A0A1C9ZQ60	>tr|A0A1C9ZQ60|A0A1C9ZQ60_HORVV NADH dehydrogenase subunit 2 OS=Hordeum vulgare subsp. vulgare OX=112509 GN=nad2 PE=3 SV=1	0.778534	0.890296	0.564387	1.14355	0.330834	nad2
A0A1C9ZW47	>tr|A0A1C9ZW47|A0A1C9ZW47_HORVV NADH-ubiquinone oxidoreductase chain 5 OS=Hordeum vulgare subsp. vulgare OX=112509 GN=nad5 PE=3 SV=1	0.695206	0.575084	0.311848	0.827214	-0.467838	nad5
A0A1M4LV24	>tr|A0A1M4LV24|A0A1M4LV24_HORVU Acetolactate synthase OS=Hordeum vulgare OX=4513 GN=ALS PE=3 SV=1	1.20621	2.08248	0.25139	1.72646	1.34678	ALS
A0A1Q1NP08	>tr|A0A1Q1NP08|A0A1Q1NP08_HORVU MIR1 OS=Hordeum vulgare OX=4513 PE=2 SV=1	0.739368	0.458981	0.325144	0.620775	-1.1759
A0A218LN67	>tr|A0A218LN67|A0A218LN67_HORVU ATP synthase subunit beta, chloroplastic OS=Hordeum vulgare OX=4513 GN=atpB PE=3 SV=1	2.73682	3.14661	0.229044	1.14973	0.344118	atpB
A0A218LNB6	>tr|A0A218LNB6|A0A218LNB6_HORVU Cytochrome b559 subunit alpha OS=Hordeum vulgare OX=4513 GN=psbE PE=3 SV=1	0.435804	0.296309	0.112959	0.679913	-0.951476	psbE
A0A218LNH3	>tr|A0A218LNH3|A0A218LNH3_HORVU ATP synthase subunit alpha, chloroplastic OS=Hordeum vulgare OX=4513 GN=atpA PE=3 SV=1	0.760086	0.760833	0.995924	1.00098	0.0024208	atpA
A0A287DTW3	>tr|A0A287DTW3|A0A287DTW3_HORVV Bowman-Birk serine protease inhibitors family domain-containing protein OS=Hordeum vulgare subsp. vulgare OX=112509 PE=4 SV=1	1.18895	0.464355	0.0197245	0.390558	-2.31877
A0A287E1P6	>tr|A0A287E1P6|A0A287E1P6_HORVV Pectinesterase inhibitor domain-containing protein OS=Hordeum vulgare subsp. vulgare OX=112509 PE=3 SV=1	0.665075	0.512292	0.547462	0.770277	-0.643718
A0A287EBT3	>tr|A0A287EBT3|A0A287EBT3_HORVV Bifunctional inhibitor/plant lipid transfer protein/seed storage helical domain-containing protein OS=Hordeum vulgare subsp. vulgare OX=112509 PE=4 SV=1	1.10967	0.566835	0.111859	0.510813	-1.65674
A0A287ESQ2	>tr|A0A287ESQ2|A0A287ESQ2_HORVV alanine transaminase OS=Hordeum vulgare subsp. vulgare OX=112509 PE=3 SV=1	12.0826	13.2047	0.749138	1.09287	0.219024
A0A287EZQ9	>tr|A0A287EZQ9|A0A287EZQ9_HORVV Uncharacterized protein OS=Hordeum vulgare subsp. vulgare OX=112509 PE=4 SV=1	3.33103	2.39809	0.0176445	0.719926	-0.810445
A0A287EZS0	>tr|A0A287EZS0|A0A287EZS0_HORVV FACT complex subunit SSRP1 OS=Hordeum vulgare subsp. vulgare OX=112509 PE=3 SV=1	0.619154	0.64401	0.633645	1.04015	0.0970751
A0A287EZV5	>tr|A0A287EZV5|A0A287EZV5_HORVV Uncharacterized protein OS=Hordeum vulgare subsp. vulgare OX=112509 PE=4 SV=1	0.783341	0.504974	0.187882	0.644641	-1.08286
A0A287F096	>tr|A0A287F096|A0A287F096_HORVV Malic enzyme OS=Hordeum vulgare subsp. vulgare OX=112509 PE=3 SV=1	1.09031	1.54369	0.040919	1.41582	0.857564
A0A287F1N0	>tr|A0A287F1N0|A0A287F1N0_HORVV Uncharacterized protein OS=Hordeum vulgare subsp. vulgare OX=112509 PE=3 SV=1	2.15107	1.08343	0.0634923	0.503671	-1.69147
A0A287F3A8	>tr|A0A287F3A8|A0A287F3A8_HORVV RAB6-interacting golgin OS=Hordeum vulgare subsp. vulgare OX=112509 PE=4 SV=1	0.387211	0.206927	0.161688	0.534403	-1.5454
A0A287F8M8	>tr|A0A287F8M8|A0A287F8M8_HORVV UDP-glucose:glycoprotein glucosyltransferase OS=Hordeum vulgare subsp. vulgare OX=112509 PE=3 SV=1	1.33735	1.4139	0.868447	1.05724	0.137281
A0A287F8R5	>tr|A0A287F8R5|A0A287F8R5_HORVV phosphoribosylformylglycinamidine synthase OS=Hordeum vulgare subsp. vulgare OX=112509 PE=3 SV=1	0.671989	1.14742	0.17116	1.7075	1.31955
A0A287FFP0	>tr|A0A287FFP0|A0A287FFP0_HORVV Methionine aminopeptidase OS=Hordeum vulgare subsp. vulgare OX=112509 PE=3 SV=1	1.39944	1.6483	0.826975	1.17783	0.403673
A0A287FP91	>tr|A0A287FP91|A0A287FP91_HORVV Protein kinase domain-containing protein OS=Hordeum vulgare subsp. vulgare OX=112509 PE=3 SV=1	1.01313	1.53057	0.525711	1.51074	1.01759
A0A287FZ34	>tr|A0A287FZ34|A0A287FZ34_HORVV Guanosine nucleotide diphosphate dissociation inhibitor OS=Hordeum vulgare subsp. vulgare OX=112509 PE=3 SV=1	0.892996	1.87273	0.253767	2.09713	1.82647
A0A287G8M3	>tr|A0A287G8M3|A0A287G8M3_HORVV fructose-bisphosphatase OS=Hordeum vulgare subsp. vulgare OX=112509 PE=3 SV=1	1.06353	1.40699	0.668467	1.32294	0.690208
A0A287GAZ3	>tr|A0A287GAZ3|A0A287GAZ3_HORVV alpha,alpha-trehalose-phosphate synthase (UDP-forming) OS=Hordeum vulgare subsp. vulgare OX=112509 PE=3 SV=1	1.16437	2.16584	0.248042	1.8601	1.53066
A0A287GCI3	>tr|A0A287GCI3|A0A287GCI3_HORVV Uncharacterized protein OS=Hordeum vulgare subsp. vulgare OX=112509 PE=3 SV=1	1.46586	1.47371	0.991958	1.00536	0.0131725
A0A287GME4	>tr|A0A287GME4|A0A287GME4_HORVV CobW/HypB/UreG nucleotide-binding domain-containing protein OS=Hordeum vulgare subsp. vulgare OX=112509 PE=3 SV=1	1.92208	1.12558	0.00609584	0.585605	-1.31974
A0A287GN26	>tr|A0A287GN26|A0A287GN26_HORVV Aspartic proteinase OS=Hordeum vulgare subsp. vulgare OX=112509 PE=3 SV=1	6.61562	6.99759	0.759868	1.05774	0.138439
A0A287GQ58	>tr|A0A287GQ58|A0A287GQ58_HORVV Uncharacterized protein OS=Hordeum vulgare subsp. vulgare OX=112509 PE=4 SV=1	0.735961	0.977351	0.280251	1.32799	0.699612
A0A287GWD4	>tr|A0A287GWD4|A0A287GWD4_HORVV VHS domain-containing protein OS=Hordeum vulgare subsp. vulgare OX=112509 PE=3 SV=1	0.616953	1.00414	0.560878	1.62757	1.20131
A0A287GWL8	>tr|A0A287GWL8|A0A287GWL8_HORVV Laccase OS=Hordeum vulgare subsp. vulgare OX=112509 GN=HvLAC1 PE=2 SV=1	0.708495	0.536388	0.150955	0.75708	-0.686338	HvLAC1
A0A287GYL8	>tr|A0A287GYL8|A0A287GYL8_HORVV Uncharacterized protein OS=Hordeum vulgare subsp. vulgare OX=112509 PE=3 SV=1	1.62615	1.53507	0.911656	0.943995	-0.142144
A0A287H6P9	>tr|A0A287H6P9|A0A287H6P9_HORVV Uncharacterized protein OS=Hordeum vulgare subsp. vulgare OX=112509 PE=3 SV=1	1.3009	0.59791	0.0207106	0.459611	-1.91724
A0A287HHI1	>tr|A0A287HHI1|A0A287HHI1_HORVV Uncharacterized protein OS=Hordeum vulgare subsp. vulgare OX=112509 PE=4 SV=1	0.675231	0.410412	0.290046	0.60781	-1.22796
A0A287HLW9	>tr|A0A287HLW9|A0A287HLW9_HORVV Probable 6-phosphogluconolactonase OS=Hordeum vulgare subsp. vulgare OX=112509 PE=3 SV=1	0.337426	0.190307	0.423634	0.563997	-1.41247
A0A287HPN8	>tr|A0A287HPN8|A0A287HPN8_HORVV Proteasome subunit alpha type OS=Hordeum vulgare subsp. vulgare OX=112509 PE=3 SV=1	3.6613	3.25322	0.526593	0.888542	-0.291452
A0A287HVV0	>tr|A0A287HVV0|A0A287HVV0_HORVV Essential protein Yae1 N-terminal domain-containing protein OS=Hordeum vulgare subsp. vulgare OX=112509 PE=4 SV=1	0.593557	0.345977	0.384347	0.582887	-1.33122
A0A287I2U0	>tr|A0A287I2U0|A0A287I2U0_HORVV Uncharacterized protein OS=Hordeum vulgare subsp. vulgare OX=112509 PE=4 SV=1	3.05267	1.91731	0.554254	0.628077	-1.14706
A0A287ILG2	>tr|A0A287ILG2|A0A287ILG2_HORVV Aldose 1-epimerase OS=Hordeum vulgare subsp. vulgare OX=112509 PE=3 SV=1	0.60192	0.484467	0.458801	0.80487	-0.535372
A0A287IVR5	>tr|A0A287IVR5|A0A287IVR5_HORVV Peptidase M28 domain-containing protein OS=Hordeum vulgare subsp. vulgare OX=112509 PE=4 SV=1	1.10027	1.63987	0.338913	1.49042	0.984191
A0A287IX56	>tr|A0A287IX56|A0A287IX56_HORVV Uncharacterized protein OS=Hordeum vulgare subsp. vulgare OX=112509 PE=4 SV=1	1.57682	1.4013	0.370295	0.888691	-0.291037
A0A287J334	>tr|A0A287J334|A0A287J334_HORVV Aspartate/glutamate/uridylate kinase domain-containing protein OS=Hordeum vulgare subsp. vulgare OX=112509 PE=3 SV=2	0.562319	0.792313	0.391091	1.40901	0.845665
A0A287JEP8	>tr|A0A287JEP8|A0A287JEP8_HORVV Protein RCC2 homolog OS=Hordeum vulgare subsp. vulgare OX=112509 PE=4 SV=1	0.897109	1.56098	0.120859	1.74001	1.36607
A0A287JR75	>tr|A0A287JR75|A0A287JR75_HORVV SART-1 family protein OS=Hordeum vulgare subsp. vulgare OX=112509 PE=3 SV=1	0.821835	0.522272	0.341149	0.635495	-1.1181
A0A287JSA9	>tr|A0A287JSA9|A0A287JSA9_HORVV Pre-mRNA cleavage factor Im 25 kDa subunit OS=Hordeum vulgare subsp. vulgare OX=112509 PE=3 SV=1	0.542256	0.936523	0.648697	1.72709	1.34768
A0A287JZL7	>tr|A0A287JZL7|A0A287JZL7_HORVV Uncharacterized protein OS=Hordeum vulgare subsp. vulgare OX=112509 PE=4 SV=1	0.420206	0.237748	0.0648589	0.565788	-1.40465
A0A287K5X8	>tr|A0A287K5X8|A0A287K5X8_HORVV Asparagine synthetase [glutamine-hydrolyzing] OS=Hordeum vulgare subsp. vulgare OX=112509 PE=4 SV=1	1.3848	1.81561	0.535721	1.3111	0.668031
A0A287KKH0	>tr|A0A287KKH0|A0A287KKH0_HORVV Peptide-N4-(N-acetyl-beta-glucosaminyl)asparagine amidase A OS=Hordeum vulgare subsp. vulgare OX=112509 PE=4 SV=1	0.670174	0.527037	0.522244	0.786419	-0.592568
A0A287KP21	>tr|A0A287KP21|A0A287KP21_HORVV leucine--tRNA ligase OS=Hordeum vulgare subsp. vulgare OX=112509 PE=3 SV=1	0.617027	0.897866	0.197089	1.45515	0.925129
A0A287KQT4	>tr|A0A287KQT4|A0A287KQT4_HORVV Importin subunit alpha OS=Hordeum vulgare subsp. vulgare OX=112509 PE=3 SV=1	2.40926	1.56066	0.36069	0.647775	-1.0709
A0A287KUB8	>tr|A0A287KUB8|A0A287KUB8_HORVV Uncharacterized protein OS=Hordeum vulgare subsp. vulgare OX=112509 PE=3 SV=1	0.588554	0.568914	0.853787	0.96663	-0.0837052
A0A287KUR3	>tr|A0A287KUR3|A0A287KUR3_HORVV ATP citrate synthase OS=Hordeum vulgare subsp. vulgare OX=112509 PE=4 SV=1	1.03063	0.947387	0.719062	0.919235	-0.207696
A0A287KXN1	>tr|A0A287KXN1|A0A287KXN1_HORVV shikimate dehydrogenase (NADP(+)) OS=Hordeum vulgare subsp. vulgare OX=112509 PE=3 SV=1	0.74207	0.650675	0.722525	0.876837	-0.324156
A0A287KZI2	>tr|A0A287KZI2|A0A287KZI2_HORVV Ubiquitin carboxyl-terminal hydrolase OS=Hordeum vulgare subsp. vulgare OX=112509 PE=3 SV=1	1.66828	1.18009	0.424397	0.707369	-0.853841
A0A287KZV7	>tr|A0A287KZV7|A0A287KZV7_HORVV Developmentally-regulated G-protein 2 OS=Hordeum vulgare subsp. vulgare OX=112509 PE=4 SV=1	0.802809	0.96033	0.548705	1.19621	0.441863
A0A287L3J7	>tr|A0A287L3J7|A0A287L3J7_HORVV Uncharacterized protein OS=Hordeum vulgare subsp. vulgare OX=112509 PE=4 SV=1	2.117	1.53121	0.210724	0.723292	-0.798938
A0A287L5I7	>tr|A0A287L5I7|A0A287L5I7_HORVV Carbonic anhydrase OS=Hordeum vulgare subsp. vulgare OX=112509 PE=3 SV=1	3.80638	2.85909	0.216137	0.751131	-0.705793
A0A287L8A3	>tr|A0A287L8A3|A0A287L8A3_HORVV NAB domain-containing protein OS=Hordeum vulgare subsp. vulgare OX=112509 PE=4 SV=1	1.9566	1.50251	0.377539	0.767919	-0.651281
A0A287L8C4	>tr|A0A287L8C4|A0A287L8C4_HORVV Vacuolar protein sorting-associated protein 25 OS=Hordeum vulgare subsp. vulgare OX=112509 PE=3 SV=1	0.666516	0.423513	0.323284	0.635413	-1.11842
A0A287LGA7	>tr|A0A287LGA7|A0A287LGA7_HORVV KRR1 small subunit processome component OS=Hordeum vulgare subsp. vulgare OX=112509 PE=3 SV=1	0.614596	0.352637	0.281387	0.57377	-1.3701
A0A287LNA3	>tr|A0A287LNA3|A0A287LNA3_HORVV Uncharacterized protein OS=Hordeum vulgare subsp. vulgare OX=112509 PE=4 SV=1	0.553708	0.337343	0.0370526	0.609244	-1.22214
A0A287LRJ1	>tr|A0A287LRJ1|A0A287LRJ1_HORVV Secretory carrier-associated membrane protein OS=Hordeum vulgare subsp. vulgare OX=112509 PE=3 SV=1	0.510461	0.244973	0.00212827	0.479905	-1.81068
A0A287LTS8	>tr|A0A287LTS8|A0A287LTS8_HORVV Glycosyltransferase OS=Hordeum vulgare subsp. vulgare OX=112509 PE=3 SV=1	0.740702	0.393384	0.240938	0.531097	-1.5607
A0A287LWH7	>tr|A0A287LWH7|A0A287LWH7_HORVV UBC core domain-containing protein OS=Hordeum vulgare subsp. vulgare OX=112509 PE=3 SV=1	1.00464	1.25852	0.692767	1.25271	0.555683
A0A287ME54	>tr|A0A287ME54|A0A287ME54_HORVV Uncharacterized protein OS=Hordeum vulgare subsp. vulgare OX=112509 PE=3 SV=1	2.232	1.35759	0.21923	0.608242	-1.2262
A0A287MFX0	>tr|A0A287MFX0|A0A287MFX0_HORVV 2-hydroxyacyl-CoA lyase OS=Hordeum vulgare subsp. vulgare OX=112509 PE=3 SV=1	0.456145	1.53181	0.192402	3.35817	2.98767
A0A287MHI9	>tr|A0A287MHI9|A0A287MHI9_HORVV hydroxyethylthiazole kinase OS=Hordeum vulgare subsp. vulgare OX=112509 PE=3 SV=1	0.781542	0.750988	0.801779	0.960906	-0.0983522
A0A287MKB2	>tr|A0A287MKB2|A0A287MKB2_HORVV Uncharacterized protein OS=Hordeum vulgare subsp. vulgare OX=112509 PE=3 SV=1	3.54964	4.91468	0.287504	1.38456	0.802488
A0A287MLU2	>tr|A0A287MLU2|A0A287MLU2_HORVV Uncharacterized protein OS=Hordeum vulgare subsp. vulgare OX=112509 PE=3 SV=1	4.80948	1.88957	0.040781	0.392885	-2.30411
A0A287MPL4	>tr|A0A287MPL4|A0A287MPL4_HORVV Splicing factor 3A subunit 1 OS=Hordeum vulgare subsp. vulgare OX=112509 PE=4 SV=1	2.01309	2.6143	0.380049	1.29865	0.644502
A0A287MTZ7	>tr|A0A287MTZ7|A0A287MTZ7_HORVV Uncharacterized protein OS=Hordeum vulgare subsp. vulgare OX=112509 PE=4 SV=1	0.814471	0.394535	0.117722	0.484407	-1.78765
A0A287NB21	>tr|A0A287NB21|A0A287NB21_HORVV ER membrane protein complex subunit 10 OS=Hordeum vulgare subsp. vulgare OX=112509 PE=3 SV=1	0.729229	0.946986	0.249411	1.29861	0.644436
A0A287NQU3	>tr|A0A287NQU3|A0A287NQU3_HORVV Peptidyl-prolyl cis-trans isomerase OS=Hordeum vulgare subsp. vulgare OX=112509 PE=3 SV=1	0.701929	0.524557	0.444532	0.747308	-0.718381
A0A287NTR5	>tr|A0A287NTR5|A0A287NTR5_HORVV Transmembrane protein 87B OS=Hordeum vulgare subsp. vulgare OX=112509 PE=3 SV=1	0.904498	1.02155	0.743458	1.12941	0.300145
A0A287NWK0	>tr|A0A287NWK0|A0A287NWK0_HORVV Target of Myb protein 1 OS=Hordeum vulgare subsp. vulgare OX=112509 PE=3 SV=1	2.17785	2.07783	0.811179	0.954076	-0.115946
A0A287NZS5	>tr|A0A287NZS5|A0A287NZS5_HORVV EGF-like calcium-binding domain-containing protein OS=Hordeum vulgare subsp. vulgare OX=112509 PE=3 SV=1	1.19421	3.24405	0.104716	2.71648	2.46467
A0A287P008	>tr|A0A287P008|A0A287P008_HORVV Uncharacterized protein OS=Hordeum vulgare subsp. vulgare OX=112509 PE=4 SV=1	1.06211	0.613865	0.133051	0.577968	-1.35212
A0A287PBT6	>tr|A0A287PBT6|A0A287PBT6_HORVV Uncharacterized protein OS=Hordeum vulgare subsp. vulgare OX=112509 PE=4 SV=1	0.855905	1.32572	0.180497	1.54891	1.07914
A0A287PLP7	>tr|A0A287PLP7|A0A287PLP7_HORVV RRM domain-containing protein OS=Hordeum vulgare subsp. vulgare OX=112509 PE=4 SV=1	0.657703	0.372726	0.143341	0.566708	-1.40064
A0A287PU65	>tr|A0A287PU65|A0A287PU65_HORVV Methyltransferase OS=Hordeum vulgare subsp. vulgare OX=112509 PE=3 SV=1	0.518889	0.605786	0.440988	1.16747	0.381872
A0A287PUS9	>tr|A0A287PUS9|A0A287PUS9_HORVV Membrane-bound NADPH oxidase OS=Hordeum vulgare subsp. vulgare OX=112509 GN=RBOHI3 PE=2 SV=1	0.506222	0.448698	0.743669	0.886365	-0.297503	RBOHI3
A0A287PVY6	>tr|A0A287PVY6|A0A287PVY6_HORVV Calcium-dependent protein kinase OS=Hordeum vulgare subsp. vulgare OX=112509 PE=4 SV=1	0.51694	1.1796	0.10314	2.28189	2.03471
A0A287PY01	>tr|A0A287PY01|A0A287PY01_HORVV Peroxidase OS=Hordeum vulgare subsp. vulgare OX=112509 PE=3 SV=1	1.30652	0.882041	0.0969313	0.675108	-0.968967
A0A287Q7U2	>tr|A0A287Q7U2|A0A287Q7U2_HORVV Uncharacterized protein OS=Hordeum vulgare subsp. vulgare OX=112509 PE=3 SV=1	1.46829	4.58234	0.258796	3.12087	2.80693
A0A287QE55	>tr|A0A287QE55|A0A287QE55_HORVV Uncharacterized protein OS=Hordeum vulgare subsp. vulgare OX=112509 PE=4 SV=1	1.14899	1.34228	0.44191	1.16822	0.383469
A0A287QL44	>tr|A0A287QL44|A0A287QL44_HORVV Uncharacterized protein OS=Hordeum vulgare subsp. vulgare OX=112509 PE=4 SV=1	0.63587	1.66313	0.259923	2.61553	2.37127
A0A287QRJ0	>tr|A0A287QRJ0|A0A287QRJ0_HORVV DM2 domain-containing protein OS=Hordeum vulgare subsp. vulgare OX=112509 PE=4 SV=1	0.429331	0.507931	0.825222	1.18308	0.414629
A0A287QXJ4	>tr|A0A287QXJ4|A0A287QXJ4_HORVV Long-chain-fatty-acid--CoA ligase OS=Hordeum vulgare subsp. vulgare OX=112509 PE=3 SV=1	0.857569	0.903871	0.844462	1.05399	0.129689
A0A287R7V7	>tr|A0A287R7V7|A0A287R7V7_HORVV 4-coumarate--CoA ligase OS=Hordeum vulgare subsp. vulgare OX=112509 PE=3 SV=1	1.49359	1.34862	0.829672	0.902941	-0.251805
A0A287R8A5	>tr|A0A287R8A5|A0A287R8A5_HORVV GPI inositol-deacylase OS=Hordeum vulgare subsp. vulgare OX=112509 PE=3 SV=1	0.704187	0.822241	0.512309	1.16764	0.38225
A0A287RBN4	>tr|A0A287RBN4|A0A287RBN4_HORVV Methyltransferase domain-containing protein OS=Hordeum vulgare subsp. vulgare OX=112509 PE=4 SV=1	0.632351	0.368683	0.311553	0.583035	-1.33059
A0A287REW1	>tr|A0A287REW1|A0A287REW1_HORVV Annexin OS=Hordeum vulgare subsp. vulgare OX=112509 PE=3 SV=1	0.710606	1.36267	0.333959	1.91762	1.60578
A0A287RYX5	>tr|A0A287RYX5|A0A287RYX5_HORVV alpha-L-fucosidase OS=Hordeum vulgare subsp. vulgare OX=112509 PE=3 SV=1	0.728	0.907878	0.111075	1.24709	0.544584
A0A287S2W4	>tr|A0A287S2W4|A0A287S2W4_HORVV Uncharacterized protein OS=Hordeum vulgare subsp. vulgare OX=112509 PE=3 SV=1	0.862149	0.652176	0.553871	0.756454	-0.688378
A0A287S3I9	>tr|A0A287S3I9|A0A287S3I9_HORVV Protein CWC15 homolog OS=Hordeum vulgare subsp. vulgare OX=112509 PE=3 SV=1	5.27678	1.99011	0.178489	0.377146	-2.40495
A0A287S6A6	>tr|A0A287S6A6|A0A287S6A6_HORVV E2 ubiquitin-conjugating enzyme OS=Hordeum vulgare subsp. vulgare OX=112509 PE=3 SV=1	0.513776	0.289584	0.130266	0.563638	-1.41404
A0A287SCX5	>tr|A0A287SCX5|A0A287SCX5_HORVV Strictosidine synthase conserved region domain-containing protein OS=Hordeum vulgare subsp. vulgare OX=112509 PE=3 SV=1	0.724807	0.492215	0.279615	0.679098	-0.954433
A0A287SNR6	>tr|A0A287SNR6|A0A287SNR6_HORVV RNA helicase OS=Hordeum vulgare subsp. vulgare OX=112509 PE=4 SV=1	3.42692	4.23074	0.693741	1.23456	0.519689
A0A287SUL6	>tr|A0A287SUL6|A0A287SUL6_HORVV AB hydrolase-1 domain-containing protein OS=Hordeum vulgare subsp. vulgare OX=112509 PE=4 SV=1	1.66003	1.41844	0.748674	0.854466	-0.387897
A0A287SWD7	>tr|A0A287SWD7|A0A287SWD7_HORVV Uncharacterized protein OS=Hordeum vulgare subsp. vulgare OX=112509 PE=4 SV=1	0.485812	0.61217	0.583974	1.2601	0.570184
A0A287SXI8	>tr|A0A287SXI8|A0A287SXI8_HORVV histidine kinase OS=Hordeum vulgare subsp. vulgare OX=112509 PE=3 SV=1	6.22048	5.36263	0.373365	0.862093	-0.36598
A0A287T3E6	>tr|A0A287T3E6|A0A287T3E6_HORVV Uncharacterized protein OS=Hordeum vulgare subsp. vulgare OX=112509 PE=3 SV=1	1.7222	1.3936	0.227196	0.809198	-0.522146
A0A287T864	>tr|A0A287T864|A0A287T864_HORVV RRM domain-containing protein OS=Hordeum vulgare subsp. vulgare OX=112509 PE=4 SV=1	1.04949	1.09843	0.906026	1.04663	0.112414
A0A287T8A1	>tr|A0A287T8A1|A0A287T8A1_HORVV Histone H2A OS=Hordeum vulgare subsp. vulgare OX=112509 PE=3 SV=1	4.26657	4.73958	0.713903	1.11087	0.259305
A0A287T8X2	>tr|A0A287T8X2|A0A287T8X2_HORVV Catalase OS=Hordeum vulgare subsp. vulgare OX=112509 PE=3 SV=1	6.03847	5.90269	0.92313	0.977514	-0.0560903
A0A287TTV1	>tr|A0A287TTV1|A0A287TTV1_HORVV Inositol-1-monophosphatase OS=Hordeum vulgare subsp. vulgare OX=112509 PE=3 SV=1	0.460163	0.578461	0.0457722	1.25708	0.564265
A0A287TWK6	>tr|A0A287TWK6|A0A287TWK6_HORVV Protein FLX-like 2 OS=Hordeum vulgare subsp. vulgare OX=112509 PE=3 SV=1	2.48115	1.44904	0.294153	0.584021	-1.32642
A0A287U3J5	>tr|A0A287U3J5|A0A287U3J5_HORVV Isopropylmalate dehydrogenase-like domain-containing protein OS=Hordeum vulgare subsp. vulgare OX=112509 PE=3 SV=1	3.06627	2.85817	0.867397	0.932132	-0.173334
A0A287U5M5	>tr|A0A287U5M5|A0A287U5M5_HORVV Uncharacterized protein OS=Hordeum vulgare subsp. vulgare OX=112509 PE=3 SV=1	2.05874	0.75162	0.0628301	0.365088	-2.48509
A0A287U993	>tr|A0A287U993|A0A287U993_HORVV Pentacotripeptide-repeat region of PRORP domain-containing protein OS=Hordeum vulgare subsp. vulgare OX=112509 PE=4 SV=1	1.0939	1.57254	0.578859	1.43756	0.895134
A0A287UER4	>tr|A0A287UER4|A0A287UER4_HORVV Sec20 OS=Hordeum vulgare subsp. vulgare OX=112509 PE=3 SV=1	0.624855	0.508571	0.747469	0.813903	-0.507848
A0A287UKD2	>tr|A0A287UKD2|A0A287UKD2_HORVV Protein CROWDED NUCLEI 1 OS=Hordeum vulgare subsp. vulgare OX=112509 PE=3 SV=1	5.44755	5.00333	0.786793	0.918456	-0.209786
A0A287ULF4	>tr|A0A287ULF4|A0A287ULF4_HORVV Non-haem dioxygenase N-terminal domain-containing protein OS=Hordeum vulgare subsp. vulgare OX=112509 PE=4 SV=1	1.98198	1.77243	0.53407	0.894271	-0.275601
A0A287UQV6	>tr|A0A287UQV6|A0A287UQV6_HORVV Uncharacterized protein OS=Hordeum vulgare subsp. vulgare OX=112509 PE=4 SV=1	4.93722	2.07469	0.180429	0.420214	-2.13827
A0A287V821	>tr|A0A287V821|A0A287V821_HORVV Acyl-CoA-binding domain-containing protein 4 OS=Hordeum vulgare subsp. vulgare OX=112509 PE=4 SV=1	0.443215	0.343763	0.613254	0.775612	-0.626696
A0A287VK78	>tr|A0A287VK78|A0A287VK78_HORVV phosphopyruvate hydratase OS=Hordeum vulgare subsp. vulgare OX=112509 PE=3 SV=1	2.81586	2.77083	0.893186	0.984008	-0.0397588
A0A287VMP5	>tr|A0A287VMP5|A0A287VMP5_HORVV GDSL esterase/lipase OS=Hordeum vulgare subsp. vulgare OX=112509 PE=3 SV=1	0.571113	0.691629	0.596735	1.21102	0.472204
A0A287VNY5	>tr|A0A287VNY5|A0A287VNY5_HORVV Gamma carbonic anhydrase OS=Hordeum vulgare subsp. vulgare OX=112509 PE=3 SV=1	0.581805	1.96124	0.102205	3.37095	2.99704
A0A287VZP8	>tr|A0A287VZP8|A0A287VZP8_HORVV UMP-CMP kinase OS=Hordeum vulgare subsp. vulgare OX=112509 PE=3 SV=1	0.554449	0.268798	0.0110564	0.484802	-1.78564
A0A287W396	>tr|A0A287W396|A0A287W396_HORVV DCD domain-containing protein OS=Hordeum vulgare subsp. vulgare OX=112509 PE=4 SV=1	0.638301	0.505299	0.605057	0.791632	-0.576274
A0A287W9B1	>tr|A0A287W9B1|A0A287W9B1_HORVV Transcription factor CBF/NF-Y/archaeal histone domain-containing protein OS=Hordeum vulgare subsp. vulgare OX=112509 PE=3 SV=1	0.421476	0.35352	0.608678	0.838767	-0.433632
A0A287WH27	>tr|A0A287WH27|A0A287WH27_HORVV RanBP2-type domain-containing protein OS=Hordeum vulgare subsp. vulgare OX=112509 PE=4 SV=1	0.808754	0.492669	0.372868	0.609171	-1.22244
A0A287WL21	>tr|A0A287WL21|A0A287WL21_HORVV Uncharacterized protein OS=Hordeum vulgare subsp. vulgare OX=112509 PE=4 SV=1	6.82441	4.10788	0.620024	0.601938	-1.2519
A0A287WL23	>tr|A0A287WL23|A0A287WL23_HORVV Methionine aminopeptidase 2 OS=Hordeum vulgare subsp. vulgare OX=112509 PE=3 SV=1	1.12288	1.13948	0.936477	1.01479	0.0362039
A0A287WRE2	>tr|A0A287WRE2|A0A287WRE2_HORVV CTLH domain-containing protein OS=Hordeum vulgare subsp. vulgare OX=112509 PE=4 SV=1	0.839551	0.785285	0.699685	0.935364	-0.164798
A0A287WTB9	>tr|A0A287WTB9|A0A287WTB9_HORVV Myb-like domain-containing protein OS=Hordeum vulgare subsp. vulgare OX=112509 PE=4 SV=1	0.939244	0.790729	0.545704	0.841878	-0.424501
A0A287WWM4	>tr|A0A287WWM4|A0A287WWM4_HORVV J domain-containing protein OS=Hordeum vulgare subsp. vulgare OX=112509 PE=4 SV=1	0.558051	0.292913	0.00919037	0.524886	-1.58972
A0A287WY76	>tr|A0A287WY76|A0A287WY76_HORVV RRM domain-containing protein OS=Hordeum vulgare subsp. vulgare OX=112509 PE=4 SV=1	0.592584	1.06112	0.432113	1.79066	1.43683
A0A287X4M9	>tr|A0A287X4M9|A0A287X4M9_HORVV Acyl-coenzyme A oxidase OS=Hordeum vulgare subsp. vulgare OX=112509 PE=3 SV=1	1.99847	1.37484	0.369656	0.687948	-0.922503
A0A287XD56	>tr|A0A287XD56|A0A287XD56_HORVV NAD-dependent epimerase/dehydratase domain-containing protein OS=Hordeum vulgare subsp. vulgare OX=112509 PE=4 SV=1	0.596784	0.660572	0.794307	1.10689	0.250458
A0A287XP46	>tr|A0A287XP46|A0A287XP46_HORVV Uncharacterized protein OS=Hordeum vulgare subsp. vulgare OX=112509 PE=4 SV=1	9.768	13.5481	0.289306	1.38698	0.806806
A0A287XXH1	>tr|A0A287XXH1|A0A287XXH1_HORVV Uncharacterized protein OS=Hordeum vulgare subsp. vulgare OX=112509 PE=4 SV=1	0.56115	0.415089	0.21838	0.739711	-0.74358
A0A287Y0A9	>tr|A0A287Y0A9|A0A287Y0A9_HORVV 4-hydroxy-4-methyl-2-oxoglutarate aldolase OS=Hordeum vulgare subsp. vulgare OX=112509 PE=3 SV=1	0.472045	0.268374	0.0577727	0.568534	-1.39271
A0A292G355	>tr|A0A292G355|A0A292G355_HORVU GDSL esterase/lipase OS=Hordeum vulgare OX=4513 GN=cer-zv PE=2 SV=1	0.68105	0.543875	0.40611	0.798583	-0.554713	cer-zv
A0A2P1AB13	>tr|A0A2P1AB13|A0A2P1AB13_HORVV Glucose-1-phosphate adenylyltransferase OS=Hordeum vulgare subsp. vulgare OX=112509 PE=2 SV=1	5.69985	7.70198	0.284639	1.35126	0.742448
A0A2P1AHN1	>tr|A0A2P1AHN1|A0A2P1AHN1_HORVU VirE2-interacting protein 1 OS=Hordeum vulgare OX=4513 GN=VIP1 PE=2 SV=1	0.666344	0.492931	0.691513	0.739755	-0.743433	VIP1
A0A2Z6DS22	>tr|A0A2Z6DS22|A0A2Z6DS22_HORVV alanine transaminase OS=Hordeum vulgare subsp. vulgare OX=112509 GN=AlaAT PE=3 SV=1	0.622823	1.37004	0.254164	2.19973	1.94427	AlaAT
A0A3B6XI31	>tr|A0A3B6XI31|A0A3B6XI31_HORVV Hordoindoline a OS=Hordeum vulgare subsp. vulgare OX=112509 GN=Hina PE=4 SV=1	8.96024	3.57141	0.0586679	0.398584	-2.2686	Hina
A0A3B6XI84	>tr|A0A3B6XI84|A0A3B6XI84_HORVV Hordoindoline b-2 OS=Hordeum vulgare subsp. vulgare OX=112509 GN=Hinb-2 PE=4 SV=1	13.7934	7.37981	0.107954	0.535024	-1.54254	Hinb-2
A0A3F2YAL5	>tr|A0A3F2YAL5|A0A3F2YAL5_HORVV Hordoindoline b-1 OS=Hordeum vulgare subsp. vulgare OX=112509 GN=Hinb-1 PE=4 SV=1	13.9356	7.44097	0.244406	0.533955	-1.54747	Hinb-1
A0A3G9EF67	>tr|A0A3G9EF67|A0A3G9EF67_HORVV ADP-glucose transporter OS=Hordeum vulgare subsp. vulgare OX=112509 GN=Lys5 PE=3 SV=1	3.56589	2.77507	0.250785	0.778228	-0.618392	Lys5
A0A3S9KBF3	>tr|A0A3S9KBF3|A0A3S9KBF3_HORVU Glucose-6-phosphate 1-dehydrogenase OS=Hordeum vulgare OX=4513 PE=2 SV=1	0.616897	0.745679	0.751895	1.20876	0.467595
A0A3S9KBF9	>tr|A0A3S9KBF9|A0A3S9KBF9_HORVU Glucose-6-phosphate 1-dehydrogenase OS=Hordeum vulgare OX=4513 PE=2 SV=1	0.384825	0.759987	0.132005	1.97489	1.67835
A0A482LM43	>tr|A0A482LM43|A0A482LM43_HORVU Beta-amylase OS=Hordeum vulgare OX=4513 GN=Bmy1 PE=3 SV=1	39.7448	42.7805	0.839604	1.07638	0.181528	Bmy1
A0A5B9D476	>tr|A0A5B9D476|A0A5B9D476_HORVS ATP synthase protein MI25 OS=Hordeum vulgare subsp. spontaneum OX=77009 GN=atp4 PE=2 SV=1	1.30122	1.85768	0.546967	1.42764	0.878064	atp4
A0A5C1YV39	>tr|A0A5C1YV39|A0A5C1YV39_HORVV acetyl-CoA carboxylase OS=Hordeum vulgare subsp. vulgare OX=112509 PE=2 SV=1	0.282474	1.41253	0.11495	5.00059	3.96965
A0A649WBX9	>tr|A0A649WBX9|A0A649WBX9_HORVV NADH-ubiquinone oxidoreductase chain 1 OS=Hordeum vulgare subsp. vulgare OX=112509 GN=nad1 PE=3 SV=1	0.590938	0.547617	0.789569	0.926692	-0.187771	nad1
A0A650D547	>tr|A0A650D547|A0A650D547_HORVV DHN4 OS=Hordeum vulgare subsp. vulgare OX=112509 PE=2 SV=1	6.01803	4.33019	0.596421	0.719535	-0.811784
A0A6B9VQN6	>tr|A0A6B9VQN6|A0A6B9VQN6_HORVV Low molecular weight glutenin subunit (Fragment) OS=Hordeum vulgare subsp. vulgare OX=112509 PE=4 SV=1	3.58005	2.22595	0.150814	0.621766	-1.17197
A0A7D5DB82	>tr|A0A7D5DB82|A0A7D5DB82_HORVV Sucrose-phosphatase OS=Hordeum vulgare subsp. vulgare OX=112509 PE=2 SV=1	2.80287	2.42544	0.308117	0.865341	-0.356705
A0A7D5DC77	>tr|A0A7D5DC77|A0A7D5DC77_HORVV Sucrose-phosphate synthase OS=Hordeum vulgare subsp. vulgare OX=112509 PE=2 SV=1	2.97502	4.00298	0.714268	1.34553	0.731971
A0A7S9YWD1	>tr|A0A7S9YWD1|A0A7S9YWD1_HORVV Peroxiredoxin OS=Hordeum vulgare subsp. vulgare OX=112509 PE=2 SV=1	6.48987	11.3787	0.03914	1.75331	1.38484
A0A897Q2U1	>tr|A0A897Q2U1|A0A897Q2U1_HORVS HVA1 OS=Hordeum vulgare subsp. spontaneum OX=77009 GN=HVA1 PE=3 SV=1	30.642	19.3206	0.135898	0.630525	-1.13746	HVA1
A0A8I6W3X0	>tr|A0A8I6W3X0|A0A8I6W3X0_HORVV ADF-H domain-containing protein OS=Hordeum vulgare subsp. vulgare OX=112509 PE=3 SV=1	0.395115	0.220108	0.109216	0.557074	-1.44293
A0A8I6W429	>tr|A0A8I6W429|A0A8I6W429_HORVV Uncharacterized protein OS=Hordeum vulgare subsp. vulgare OX=112509 PE=4 SV=1	0.675524	0.484155	0.119365	0.716711	-0.821483
A0A8I6W4A1	>tr|A0A8I6W4A1|A0A8I6W4A1_HORVV Isovaleryl-CoA dehydrogenase, mitochondrial OS=Hordeum vulgare subsp. vulgare OX=112509 PE=3 SV=1	0.967582	1.19732	0.520519	1.23743	0.525416
A0A8I6W4Q8	>tr|A0A8I6W4Q8|A0A8I6W4Q8_HORVV Cullin family profile domain-containing protein OS=Hordeum vulgare subsp. vulgare OX=112509 PE=3 SV=1	0.562871	1.82598	0.318336	3.24404	2.9024
A0A8I6W4X4	>tr|A0A8I6W4X4|A0A8I6W4X4_HORVV Ribosomal protein L10e/L16 domain-containing protein OS=Hordeum vulgare subsp. vulgare OX=112509 PE=3 SV=1	3.0187	2.98208	0.971727	0.987868	-0.0301037
A0A8I6W507	>tr|A0A8I6W507|A0A8I6W507_HORVV PB1 domain-containing protein OS=Hordeum vulgare subsp. vulgare OX=112509 PE=4 SV=1	0.369765	0.457824	0.485437	1.23815	0.526847
A0A8I6W5F0	>tr|A0A8I6W5F0|A0A8I6W5F0_HORVV NAD(P)H dehydrogenase (quinone) OS=Hordeum vulgare subsp. vulgare OX=112509 PE=3 SV=1	0.639432	0.485198	0.644057	0.758796	-0.680754
A0A8I6W5Q4	>tr|A0A8I6W5Q4|A0A8I6W5Q4_HORVV Prefoldin subunit 5 OS=Hordeum vulgare subsp. vulgare OX=112509 PE=3 SV=1	4.04647	2.34172	0.0728153	0.578708	-1.34896
A0A8I6W6F0	>tr|A0A8I6W6F0|A0A8I6W6F0_HORVV Glycoside hydrolase family 31 N-terminal domain-containing protein OS=Hordeum vulgare subsp. vulgare OX=112509 PE=3 SV=1	1.184	1.63636	0.501391	1.38206	0.798036
A0A8I6W6I7	>tr|A0A8I6W6I7|A0A8I6W6I7_HORVV RanBD1 domain-containing protein OS=Hordeum vulgare subsp. vulgare OX=112509 PE=4 SV=1	1.9363	1.66186	0.478039	0.858269	-0.376943
A0A8I6W6N1	>tr|A0A8I6W6N1|A0A8I6W6N1_HORVV Glycosyl hydrolase family 13 catalytic domain-containing protein OS=Hordeum vulgare subsp. vulgare OX=112509 PE=4 SV=1	1.40163	0.601763	0.146039	0.42933	-2.08533
A0A8I6W6Q7	>tr|A0A8I6W6Q7|A0A8I6W6Q7_HORVV DNA replication licensing factor MCM2 OS=Hordeum vulgare subsp. vulgare OX=112509 PE=4 SV=1	1.81098	1.0555	0.144863	0.582833	-1.33144
A0A8I6W6U7	>tr|A0A8I6W6U7|A0A8I6W6U7_HORVV Uncharacterized protein OS=Hordeum vulgare subsp. vulgare OX=112509 PE=4 SV=1	0.533881	0.251576	0.0168572	0.471221	-1.85572
A0A8I6W7E8	>tr|A0A8I6W7E8|A0A8I6W7E8_HORVV RRM domain-containing protein OS=Hordeum vulgare subsp. vulgare OX=112509 PE=4 SV=1	0.759951	0.984681	0.464729	1.29572	0.63893
A0A8I6W7H3	>tr|A0A8I6W7H3|A0A8I6W7H3_HORVV dolichyl-diphosphooligosaccharide--protein glycotransferase OS=Hordeum vulgare subsp. vulgare OX=112509 PE=3 SV=1	0.681635	1.20094	0.283396	1.76186	1.39684
A0A8I6W7J3	>tr|A0A8I6W7J3|A0A8I6W7J3_HORVV Proline iminopeptidase OS=Hordeum vulgare subsp. vulgare OX=112509 PE=3 SV=1	3.08067	2.31428	0.743083	0.751226	-0.705484
A0A8I6W7S3	>tr|A0A8I6W7S3|A0A8I6W7S3_HORVV Btz domain-containing protein OS=Hordeum vulgare subsp. vulgare OX=112509 PE=3 SV=1	0.609815	0.513291	0.697942	0.841716	-0.424974
A0A8I6W7Y2	>tr|A0A8I6W7Y2|A0A8I6W7Y2_HORVV ATP synthase subunit beta OS=Hordeum vulgare subsp. vulgare OX=112509 PE=3 SV=1	3.70363	6.42171	0.127452	1.73389	1.35738
A0A8I6W878	>tr|A0A8I6W878|A0A8I6W878_HORVV Uncharacterized protein OS=Hordeum vulgare subsp. vulgare OX=112509 PE=3 SV=1	1.61466	1.04566	0.335417	0.647602	-1.07156
A0A8I6W8C2	>tr|A0A8I6W8C2|A0A8I6W8C2_HORVV Eukaryotic translation initiation factor 3 subunit D OS=Hordeum vulgare subsp. vulgare OX=112509 PE=3 SV=1	0.785879	1.29607	0.0241156	1.6492	1.23386
A0A8I6W8M4	>tr|A0A8I6W8M4|A0A8I6W8M4_HORVV Calcium-dependent protein kinase OS=Hordeum vulgare subsp. vulgare OX=112509 PE=4 SV=1	1.13462	1.29592	0.598823	1.14216	0.327819
A0A8I6W8X9	>tr|A0A8I6W8X9|A0A8I6W8X9_HORVV RRM domain-containing protein OS=Hordeum vulgare subsp. vulgare OX=112509 PE=4 SV=1	0.913137	0.962963	0.839065	1.05457	0.131034
A0A8I6W9A2	>tr|A0A8I6W9A2|A0A8I6W9A2_HORVV Uncharacterized protein OS=Hordeum vulgare subsp. vulgare OX=112509 PE=3 SV=1	0.789219	0.390475	0.0944287	0.494761	-1.73549
A0A8I6W9H5	>tr|A0A8I6W9H5|A0A8I6W9H5_HORVV RuBisCO large subunit-binding protein subunit alpha, chloroplastic OS=Hordeum vulgare subsp. vulgare OX=112509 PE=3 SV=1	0.756904	1.04919	0.486901	1.38615	0.805329
A0A8I6WA99	>tr|A0A8I6WA99|A0A8I6WA99_HORVV FAD-binding FR-type domain-containing protein OS=Hordeum vulgare subsp. vulgare OX=112509 PE=4 SV=1	0.567923	0.512655	0.812703	0.902684	-0.252506
A0A8I6WAB6	>tr|A0A8I6WAB6|A0A8I6WAB6_HORVV Association with the SNF1 complex (ASC) domain-containing protein OS=Hordeum vulgare subsp. vulgare OX=112509 PE=3 SV=1	0.603238	0.507607	0.666126	0.84147	-0.425695
A0A8I6WAU3	>tr|A0A8I6WAU3|A0A8I6WAU3_HORVV Uncharacterized protein OS=Hordeum vulgare subsp. vulgare OX=112509 PE=3 SV=1	3.15789	1.55113	0.032204	0.491192	-1.75335
A0A8I6WAU6	>tr|A0A8I6WAU6|A0A8I6WAU6_HORVV Trafficking protein particle complex subunit OS=Hordeum vulgare subsp. vulgare OX=112509 PE=3 SV=1	2.0209	1.38246	0.564655	0.684082	-0.936401
A0A8I6WB19	>tr|A0A8I6WB19|A0A8I6WB19_HORVV Uncharacterized protein OS=Hordeum vulgare subsp. vulgare OX=112509 PE=4 SV=1	0.567897	0.94982	0.223756	1.67252	1.2685
A0A8I6WB26	>tr|A0A8I6WB26|A0A8I6WB26_HORVV Uncharacterized protein OS=Hordeum vulgare subsp. vulgare OX=112509 PE=4 SV=1	1.04091	0.661615	0.411633	0.635613	-1.11764
A0A8I6WB52	>tr|A0A8I6WB52|A0A8I6WB52_HORVV Bifunctional inhibitor/plant lipid transfer protein/seed storage helical domain-containing protein OS=Hordeum vulgare subsp. vulgare OX=112509 PE=4 SV=1	15.375	7.86408	0.165227	0.511483	-1.65351
A0A8I6WB89	>tr|A0A8I6WB89|A0A8I6WB89_HORVV VWFA domain-containing protein OS=Hordeum vulgare subsp. vulgare OX=112509 PE=4 SV=1	0.670327	1.04582	0.39083	1.56017	1.09699
A0A8I6WBH0	>tr|A0A8I6WBH0|A0A8I6WBH0_HORVV WPP domain-containing protein OS=Hordeum vulgare subsp. vulgare OX=112509 PE=4 SV=1	1.93106	1.02878	0.358452	0.532754	-1.55302
A0A8I6WBL2	>tr|A0A8I6WBL2|A0A8I6WBL2_HORVV Cullin family profile domain-containing protein OS=Hordeum vulgare subsp. vulgare OX=112509 PE=3 SV=1	0.923036	0.992599	0.81946	1.07536	0.179199
A0A8I6WBR4	>tr|A0A8I6WBR4|A0A8I6WBR4_HORVV Acyl-coenzyme A oxidase OS=Hordeum vulgare subsp. vulgare OX=112509 PE=3 SV=1	1.67168	2.56609	0.484763	1.53503	1.05694
A0A8I6WBW4	>tr|A0A8I6WBW4|A0A8I6WBW4_HORVV Peroxidase OS=Hordeum vulgare subsp. vulgare OX=112509 PE=3 SV=1	0.843415	0.741528	0.786103	0.879197	-0.317526
A0A8I6WC09	>tr|A0A8I6WC09|A0A8I6WC09_HORVV MI domain-containing protein OS=Hordeum vulgare subsp. vulgare OX=112509 PE=3 SV=1	3.07256	1.86392	0.137077	0.606634	-1.23273
A0A8I6WCB5	>tr|A0A8I6WCB5|A0A8I6WCB5_HORVV Coatomer subunit gamma OS=Hordeum vulgare subsp. vulgare OX=112509 PE=3 SV=1	0.975667	1.26698	0.556716	1.29858	0.644372
A0A8I6WCK6	>tr|A0A8I6WCK6|A0A8I6WCK6_HORVV RRM domain-containing protein OS=Hordeum vulgare subsp. vulgare OX=112509 PE=4 SV=1	2.08616	4.8819	0.2525	2.34014	2.09688
A0A8I6WCL2	>tr|A0A8I6WCL2|A0A8I6WCL2_HORVV RRM domain-containing protein OS=Hordeum vulgare subsp. vulgare OX=112509 PE=4 SV=1	0.436044	0.388466	0.719891	0.890887	-0.28495
A0A8I6WCM0	>tr|A0A8I6WCM0|A0A8I6WCM0_HORVV methionine S-methyltransferase OS=Hordeum vulgare subsp. vulgare OX=112509 PE=3 SV=1	0.835654	1.20524	0.362962	1.44227	0.903197
A0A8I6WCU8	>tr|A0A8I6WCU8|A0A8I6WCU8_HORVV Uncharacterized protein OS=Hordeum vulgare subsp. vulgare OX=112509 PE=4 SV=1	0.561301	0.502079	0.480192	0.894491	-0.274993
A0A8I6WCU9	>tr|A0A8I6WCU9|A0A8I6WCU9_HORVV J domain-containing protein OS=Hordeum vulgare subsp. vulgare OX=112509 PE=4 SV=1	1.16448	0.85174	0.543632	0.731433	-0.771334
A0A8I6WCV5	>tr|A0A8I6WCV5|A0A8I6WCV5_HORVV Inositol-tetrakisphosphate 1-kinase OS=Hordeum vulgare subsp. vulgare OX=112509 PE=3 SV=1	4.05662	5.67064	0.584995	1.39787	0.82609
A0A8I6WD25	>tr|A0A8I6WD25|A0A8I6WD25_HORVV Beta-hexosaminidase OS=Hordeum vulgare subsp. vulgare OX=112509 PE=3 SV=1	0.65187	0.346709	0.147656	0.531868	-1.55712
A0A8I6WD43	>tr|A0A8I6WD43|A0A8I6WD43_HORVV Alginate lyase 2 domain-containing protein OS=Hordeum vulgare subsp. vulgare OX=112509 PE=4 SV=1	0.611904	0.769925	0.162531	1.25824	0.566552
A0A8I6WD63	>tr|A0A8I6WD63|A0A8I6WD63_HORVV Uncharacterized protein OS=Hordeum vulgare subsp. vulgare OX=112509 PE=3 SV=1	27.7198	15.3203	0.0936574	0.552684	-1.46244
A0A8I6WD69	>tr|A0A8I6WD69|A0A8I6WD69_HORVV GCK domain-containing protein OS=Hordeum vulgare subsp. vulgare OX=112509 PE=4 SV=1	1.41652	0.555764	0.055289	0.392344	-2.30752
A0A8I6WD99	>tr|A0A8I6WD99|A0A8I6WD99_HORVV 4-hydroxy-7-methoxy-3-oxo-3,4-dihydro-2H-1,4-benzoxazin-2-yl glucosidebeta-D-glucosidase OS=Hordeum vulgare subsp. vulgare OX=112509 PE=3 SV=1	0.735202	0.712591	0.937712	0.969244	-0.0770436
A0A8I6WDG9	>tr|A0A8I6WDG9|A0A8I6WDG9_HORVV Bifunctional inhibitor/plant lipid transfer protein/seed storage helical domain-containing protein OS=Hordeum vulgare subsp. vulgare OX=112509 PE=3 SV=1	1.83688	2.36741	0.387788	1.28882	0.625768
A0A8I6WDH7	>tr|A0A8I6WDH7|A0A8I6WDH7_HORVV Tetratricopeptide SHNi-TPR domain-containing protein OS=Hordeum vulgare subsp. vulgare OX=112509 PE=3 SV=1	1.72511	2.27178	0.287014	1.31689	0.678903
A0A8I6WDM0	>tr|A0A8I6WDM0|A0A8I6WDM0_HORVV Bowman-Birk serine protease inhibitors family domain-containing protein OS=Hordeum vulgare subsp. vulgare OX=112509 PE=4 SV=1	7.85596	3.30643	0.0792382	0.420882	-2.13434
A0A8I6WDM4	>tr|A0A8I6WDM4|A0A8I6WDM4_HORVV alanine transaminase OS=Hordeum vulgare subsp. vulgare OX=112509 PE=3 SV=1	0.733772	1.32334	0.248347	1.80347	1.45441
A0A8I6WDR3	>tr|A0A8I6WDR3|A0A8I6WDR3_HORVV V-type proton ATPase proteolipid subunit OS=Hordeum vulgare subsp. vulgare OX=112509 PE=3 SV=1	1.24327	0.579442	0.074633	0.466065	-1.88285
A0A8I6WDR8	>tr|A0A8I6WDR8|A0A8I6WDR8_HORVV Phosphoglycerate kinase OS=Hordeum vulgare subsp. vulgare OX=112509 PE=3 SV=1	2.33203	1.53396	0.045953	0.65778	-1.0331
A0A8I6WDS1	>tr|A0A8I6WDS1|A0A8I6WDS1_HORVV C2H2-type domain-containing protein OS=Hordeum vulgare subsp. vulgare OX=112509 PE=4 SV=1	0.712385	0.343198	0.00600226	0.48176	-1.80117
A0A8I6WDV9	>tr|A0A8I6WDV9|A0A8I6WDV9_HORVV Histone H3 OS=Hordeum vulgare subsp. vulgare OX=112509 PE=3 SV=1	1.57335	2.98221	0.0550013	1.89545	1.57709
A0A8I6WDX9	>tr|A0A8I6WDX9|A0A8I6WDX9_HORVV Bacterial surface antigen (D15) domain-containing protein OS=Hordeum vulgare subsp. vulgare OX=112509 PE=3 SV=1	0.855731	0.738618	0.812559	0.863143	-0.362977
A0A8I6WDY7	>tr|A0A8I6WDY7|A0A8I6WDY7_HORVV SelT-like protein OS=Hordeum vulgare subsp. vulgare OX=112509 PE=4 SV=1	0.488296	0.591891	0.406906	1.21216	0.474519
A0A8I6WE67	>tr|A0A8I6WE67|A0A8I6WE67_HORVV glutathione transferase OS=Hordeum vulgare subsp. vulgare OX=112509 PE=3 SV=1	1.19272	0.302127	0.0461306	0.253309	-3.38659
A0A8I6WE83	>tr|A0A8I6WE83|A0A8I6WE83_HORVV Patellin-5 OS=Hordeum vulgare subsp. vulgare OX=112509 PE=3 SV=1	6.53634	4.88682	0.274378	0.747639	-0.717287
A0A8I6WEA7	>tr|A0A8I6WEA7|A0A8I6WEA7_HORVV Peripheral-type benzodiazepine receptor OS=Hordeum vulgare subsp. vulgare OX=112509 PE=3 SV=1	2.05541	2.0439	0.985171	0.994397	-0.0138563
A0A8I6WEB0	>tr|A0A8I6WEB0|A0A8I6WEB0_HORVV Uncharacterized protein OS=Hordeum vulgare subsp. vulgare OX=112509 PE=3 SV=1	1.68797	0.786183	0.229578	0.465755	-1.88449
A0A8I6WEF4	>tr|A0A8I6WEF4|A0A8I6WEF4_HORVV Tubulin gamma chain OS=Hordeum vulgare subsp. vulgare OX=112509 PE=3 SV=1	0.666855	0.458902	0.516203	0.688159	-0.921744
A0A8I6WEG8	>tr|A0A8I6WEG8|A0A8I6WEG8_HORVV SAM domain-containing protein OS=Hordeum vulgare subsp. vulgare OX=112509 PE=4 SV=1	0.561975	0.290312	0.127755	0.516592	-1.629
A0A8I6WEH2	>tr|A0A8I6WEH2|A0A8I6WEH2_HORVV Dihydrolipoyl dehydrogenase OS=Hordeum vulgare subsp. vulgare OX=112509 PE=3 SV=1	3.02539	4.30257	0.258764	1.42215	0.868562
A0A8I6WEI5	>tr|A0A8I6WEI5|A0A8I6WEI5_HORVV DNA-binding protein S1FA OS=Hordeum vulgare subsp. vulgare OX=112509 PE=3 SV=1	0.562344	0.323319	0.424713	0.574948	-1.36504
A0A8I6WEK2	>tr|A0A8I6WEK2|A0A8I6WEK2_HORVV Uncharacterized protein OS=Hordeum vulgare subsp. vulgare OX=112509 PE=4 SV=1	0.287875	0.474571	0.109609	1.64853	1.23287
A0A8I6WEP4	>tr|A0A8I6WEP4|A0A8I6WEP4_HORVV Bifunctional inhibitor/plant lipid transfer protein/seed storage helical domain-containing protein OS=Hordeum vulgare subsp. vulgare OX=112509 PE=4 SV=1	0.463914	0.354925	0.528393	0.765067	-0.660457
A0A8I6WEQ3	>tr|A0A8I6WEQ3|A0A8I6WEQ3_HORVV Uncharacterized protein OS=Hordeum vulgare subsp. vulgare OX=112509 PE=4 SV=1	0.996375	0.460005	0.0403682	0.461679	-1.90617
A0A8I6WF01	>tr|A0A8I6WF01|A0A8I6WF01_HORVV GB1/RHD3-type G domain-containing protein OS=Hordeum vulgare subsp. vulgare OX=112509 PE=3 SV=1	1.28177	1.59227	0.781881	1.24224	0.534981
A0A8I6WF61	>tr|A0A8I6WF61|A0A8I6WF61_HORVV PLAT domain-containing protein OS=Hordeum vulgare subsp. vulgare OX=112509 PE=4 SV=1	0.683847	0.509423	0.475599	0.744938	-0.726215
A0A8I6WF68	>tr|A0A8I6WF68|A0A8I6WF68_HORVV Carboxypeptidase OS=Hordeum vulgare subsp. vulgare OX=112509 PE=3 SV=1	2.38223	1.62992	0.0472101	0.684199	-0.93598
A0A8I6WF89	>tr|A0A8I6WF89|A0A8I6WF89_HORVV lactoylglutathione lyase OS=Hordeum vulgare subsp. vulgare OX=112509 PE=3 SV=1	1.59095	3.79542	0.381807	2.38563	2.14436
A0A8I6WF91	>tr|A0A8I6WF91|A0A8I6WF91_HORVV Peroxisomal membrane protein PEX14 OS=Hordeum vulgare subsp. vulgare OX=112509 PE=3 SV=1	1.61553	0.912044	0.331416	0.564549	-1.41006
A0A8I6WF98	>tr|A0A8I6WF98|A0A8I6WF98_HORVV Major facilitator superfamily (MFS) profile domain-containing protein OS=Hordeum vulgare subsp. vulgare OX=112509 PE=3 SV=1	1.51997	1.87536	0.416903	1.23382	0.518204
A0A8I6WFA7	>tr|A0A8I6WFA7|A0A8I6WFA7_HORVV Transcription initiation factor IIF subunit alpha OS=Hordeum vulgare subsp. vulgare OX=112509 PE=3 SV=1	0.427621	0.444919	0.894493	1.04045	0.0978024
[truncated: 3,690 more rows]

## Sheet: CK-UVB
Accession	Description	MEAN CK	MEAN UVB	P-VALUE	FOLD CHANGE	LOG1.5_FOLDCHANGE	GeneName
[truncated: 3,949 more rows]
