# Supplementary material for: Muti-omics revealed the global response of Hordeum vulgare to different wavelength of UV exposure
Source: Research Square preprint supplement (doi:10.21203/rs.3.rs-5763885/v1), 2025-04-23
Supplement: Supplementary file 4 [file cd0d4447a02bf8e4816f0f02.docx]

**Supplemental Figures**


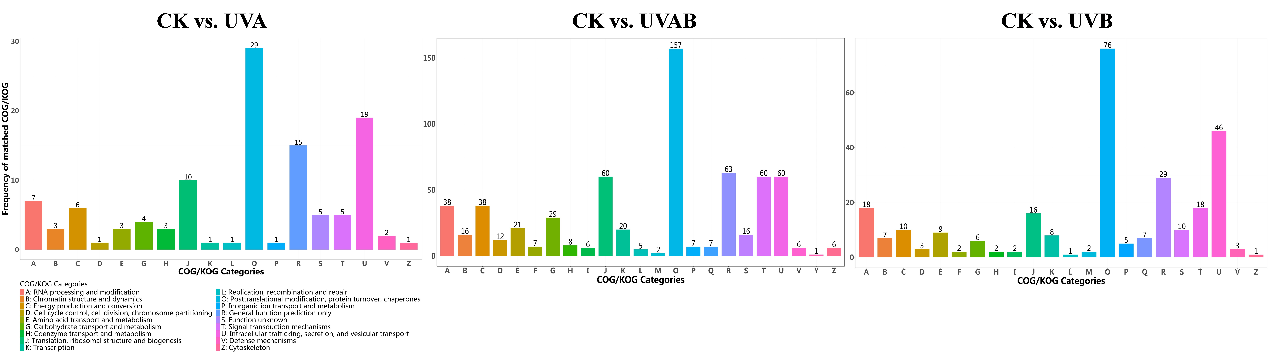


**Figure S1 COG/KOG enrichment on DEPs from three comparisons.**


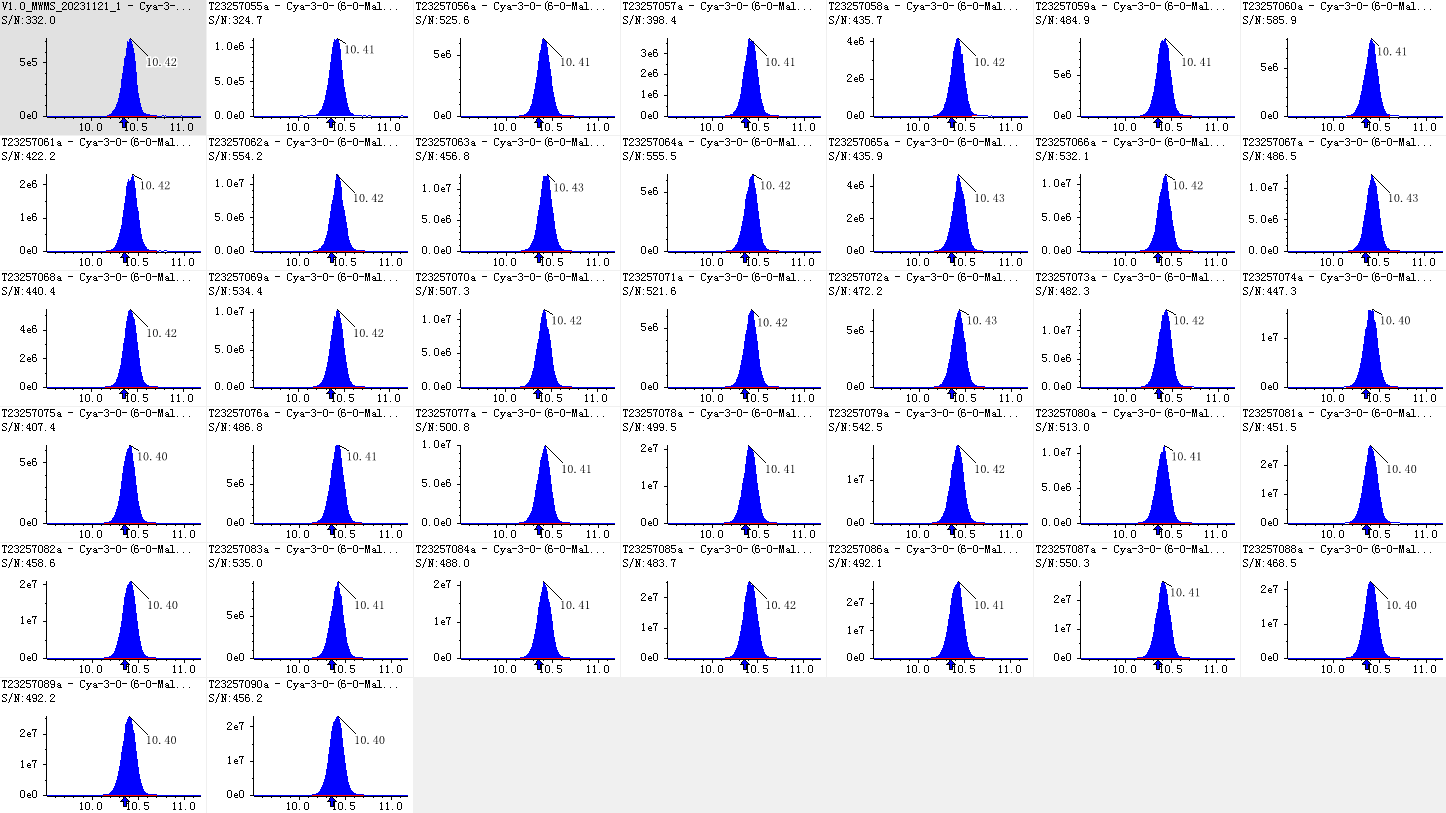


**Figure S2 Identification of anthocyanins in LC-MS assay.**


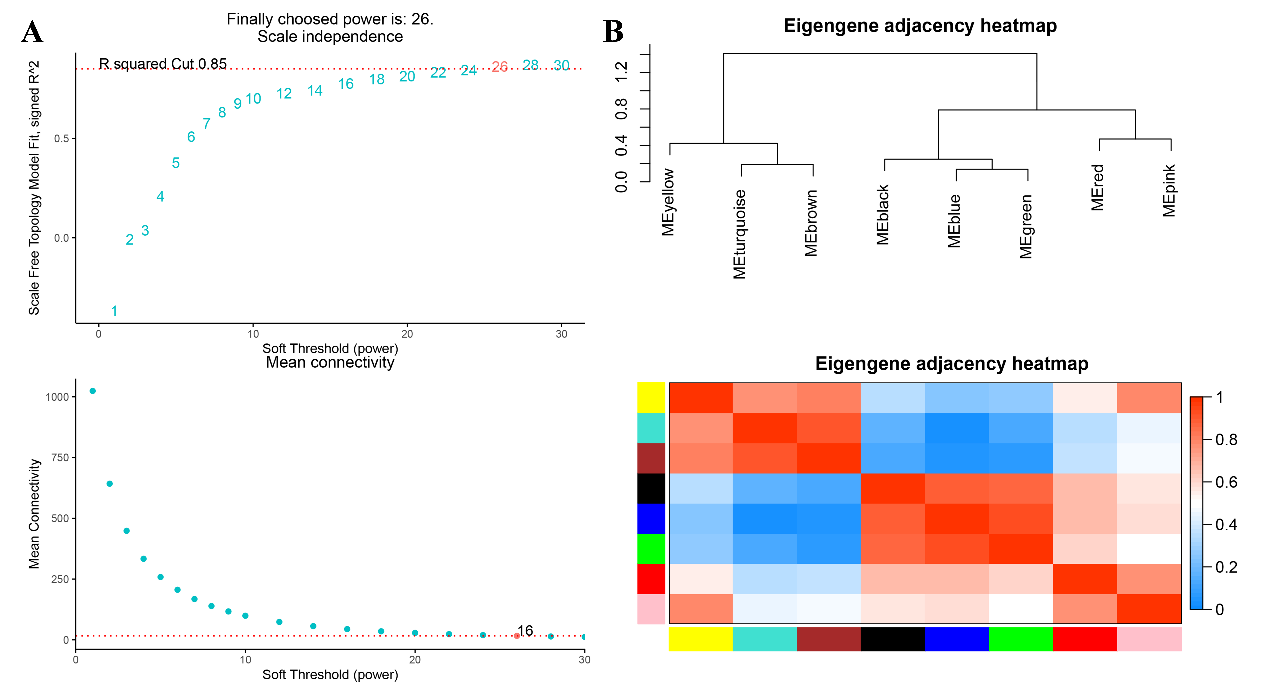


**Figure S3 Construction of WGCNA network. A:** Scale independence and mean connectivity analysis of WGCNA construction. **B:** Clustering dendrogram of hub genes, with dissimilarity based on topological overlap, together with assigned module colors.
