# Supplementary material for: Muti-omics revealed the global response of Hordeum vulgare to different wavelength of UV exposure
Source: Research Square preprint supplement (doi:10.21203/rs.3.rs-5763885/v1), 2025-04-23
Supplement: Supplementary file 5 [file dabec315177694e0b433fdd7.xlsx]

## Sheet: Sheet1
Index	Compounds	物质	Class	物质类别	Q1 (Da)	Q3 (Da)	Molecular Weight	Ion mode	Ionization model	Formula	LTck1	LTck2	LTck3	LT1-1	LT1-2	LT1-3	LT2-1	LT2-2	LT2-3	LT3-1	LT3-2	LT3-3	Ultck1	Ultck2	Ultck3	Ult1-1	Ult1-2	Ult1-3	Ult2-1	Ult2-2	Ult2-3	Ult3-1	Ult3-2	Ult3-3	Drck1	Drck2	Drck3	Dr1-1	Dr1-2	Dr1-3	Dr2-1	Dr2-2	Dr2-3	Dr3-1	Dr3-2	Dr3-3	MWXS234226a_R1	MWXS234226a_R2	MWXS234226a_R3
Anthocyanidin_11	Cyanidin-3-O-glucoside	矢车菊素-3-O-葡萄糖苷	Cyanidin	矢车菊素	449.1	287.1	449.108	Positive	[M]+	C21H21O11+	0.213804	1.03148	0.657895	0.71079	1.51081	1.10218	0.346961	1.89458	2.20519	1.00602	0.661528	1.51407	1.96348	0.879534	1.58921	1.78907	1.07135	1.04909	2.7076	2.88458	1.28054	1.76955	1.57649	3.27622	2.96432	1.93771	4.37046	3.72453	1.35339	3.65134	5.01079	5.4741	5.05055	4.08558	4.54855	4.28806	2.66474	2.73418	2.70976
Anthocyanidin_05	Cyanidin-3-O-(6-O-malonyl-beta-D-glucoside)	矢车菊素-3-O-(6-O-丙二酰-β-D-葡萄糖苷)	Cyanidin	矢车菊素	535.1	287.1	535.109	Positive	[M]+	C24H23O14+	2.84038	16.3626	9.69149	10.7091	25.6583	19.6124	5.83069	27.7434	32.4593	15.9506	11.2036	27.2193	30.4861	13.7209	25.9356	28.6867	16.3423	16.921	35.6815	41.0504	16.607	25.0535	24.3134	54.1125	46.1221	27.0752	70.6573	55.1819	21.7701	52.6644	68.3994	73.4275	67.8447	59.3252	68.1295	62.5619	41.1402	41.7102	42.0176
Anthocyanidin_04	Cyanidin-3,5-O-diglucoside	矢车菊素-3,5-O-二葡萄糖苷	Cyanidin	矢车菊素	611.2	287.1	611.161	Positive	[M]+	C27H31O16+	0	0	0	0.00389088	0	0	0	0	0.00970988	0	0	0	0	0	0	0.0117515	0	0	0	0	0	0	0	0.0171466	0.0141283	0	0.0180693	0	0	0.0152373	0.0172439	0.0201776	0.0166821	0.0148023	0.014535	0.0212946	0	0	0
Anthocyanidin_14	Cyanidin-3-O-sambubioside	矢车菊素-3-O-桑布双糖苷	Cyanidin	矢车菊素	581.1	287.1	581.151	Positive	[M]+	C26H29O15+	0.0011437	0	0	0.000547771	0	0	0	0.00171858	0	0.00122122	0	0	0	0	0.00125838	0	0	0	0.00167304	0	0	0.00110481	0	0	0.00226343	0.00347734	0.00351732	0.00232944	0	0	0	0	0	0	0	0	0.00245124	0.00234612	0.00205434
Anthocyanidin_133	Cyanidin-3-(malonyl)glucoside-5-rhamnoside	矢车菊素-3-O-丙二酰-葡萄糖苷-5-O-鼠李糖苷	Cyanidin	矢车菊素	681.17	287.1	681.167	Positive	[M+H]+	C30H33O18+	0	0	0	0	0	0	0	0	0.00221308	0.001091	0	0	0	0	0	0.00172924	0	0	0.00197153	0	0.00123169	0	0	0.00703243	0.00430635	0.00179157	0.00905077	0.00418006	0.00204174	0.00543719	0.00751441	0.00497345	0.00693957	0.00292345	0.0090522	0.00346238	0	0	0
Anthocyanidin_15	Cyanidin-3-O-sophoroside	矢车菊素-3-O-槐糖苷	Cyanidin	矢车菊素	611.2	287.15	611.161	Positive	[M]+	C27H31O16+	0	0	0	0	0	0	0	0	0.00890591	0	0	0.00436392	0.00952825	0	0.00619214	0.00761353	0	0	0.011524	0.0135403	0	0.00617379	0.0106556	0.019369	0.0139217	0.0105189	0.0185711	0.0246668	0.00415655	0.0157908	0.0309506	0.0261404	0.0297914	0.0175925	0.024341	0.0209605	0.0120984	0.0170903	0.0140671
Anthocyanidin_16	Cyanidin-3-O-xyloside	矢车菊素-3-O-木糖苷	Cyanidin	矢车菊素	419.1	287.1	419.098	Positive	[M]+	C20H19O10+	0	0.000243998	0	0	0	0	0	0	0.00508316	0.00204919	0	0.000804901	0.00036629	0	0.00176872	0.00111108	0	0	0.00638496	0.00535862	0.00286781	0.00190123	0.0016904	0.0134743	0.0115577	0.00396028	0.014065	0.0181907	0.000274594	0.0108996	0.0169934	0.0177914	0.0171037	0.0106282	0.00945457	0.0129082	0.00331478	0.00304402	0.0029321
Anthocyanidin_208	Delphinidin-3-O-xyloside	飞燕草素-3-O-木糖苷	Delphinidin	飞燕草素	435.09	303.1	435.093	Positive	[M+H]+	C20H19O11+	0	0	0	0	0	0	0	0	0	0	0	0	0	0	0	0	0	0	0	0	0	0	0	0	0.00974456	0.00861833	0	0	0.00960396	0	0	0	0	0	0	0	0	0	0
Anthocyanidin_210	Delphinidin-3-O-glucuronide	飞燕草素-3-葡萄糖醛酸苷	Delphinidin	飞燕草素	479.1	303.1	479.083	Positive	[M+H]+	C21H19O13+	0	0	0	0	0	0	0	0	0	0	0	0.0153719	0.0174594	0	0	0	0.0158268	0.0158033	0.0145894	0	0	0	0	0	0	0.0161187	0	0	0	0	0	0.0179699	0.0231469	0	0	0.0177042	0	0	0
Anthocyanidin_27	Delphinidin-3-O-glucoside	飞燕草素-3-O-葡萄糖苷	Delphinidin	飞燕草素	465.1	303.1	465.103	Positive	[M]+	C21H21O12+	0.00544287	0.000339052	0.022602	0.0535518	0.0466403	0.0442781	0.0364495	0.0279183	0.047822	0.0403931	0.0085305	0.077495	0.0723018	0.0262984	0.0331589	0.112815	0.00880168	0.0552593	0.0810598	0.068767	0.0452785	0.157065	0.0502968	0.0719298	0.155996	0.0917051	0.37276	0.0872189	0.129943	0.039381	0.0666724	0.0705659	0.0526578	0.123536	0.131793	0.127798	0.0911336	0.093826	0.0929592
Anthocyanidin_29	Delphinidin-3-O-rutinoside	飞燕草素-3-O-芸香糖苷	Delphinidin	飞燕草素	611.1	303.1	611.161	Positive	[M]+	C27H31O16+	0.0261897	0.0234709	0.044055	0.0999471	0.0948759	0.046453	0.0603028	0.0838331	0.0697747	0.0554125	0.0439331	0.0876918	0.101235	0.0457971	0.0545428	0.121997	0.0354098	0.0845504	0.0677919	0.0793968	0.0499893	0.0790231	0.0724499	0.0597101	0.198804	0.101303	0.28723	0.0731815	0.147071	0.0812988	0.0788482	0.0755364	0.0838053	0.116475	0.175952	0.139096	0.112762	0.107426	0.101481
Anthocyanidin_51	Malvidin-3-O-glucoside	锦葵色素-3-O-葡萄糖苷	Malvidin	锦葵色素	493.1	331.1	493.135	Positive	[M]+	C23H25O12+	0	0	0	0	0.000444704	0	0	0	0	0	0	0	0	0	0	0.00244718	0.000127246	0	0	0.00328522	0	0	0	0	0.00368677	0	0	0	0	0	0	0	0	0.00575152	0.00513665	0.0100012	0	0	0
Anthocyanidin_68	Pelargonidin-3-O-glucoside	天竺葵素-3-O-葡萄糖苷	Pelargonidin	天竺葵素	433.2	271.1	433.113	Positive	[M]+	C21H21O10+	0.0186513	0.0749522	0.0472738	0.0509547	0.0961672	0.0769241	0.0267221	0.115652	0.102999	0.0538945	0.0532558	0.0816151	0.0995137	0.0570434	0.0946261	0.0910104	0.0706162	0.0610681	0.131126	0.134502	0.0761292	0.0806886	0.0832546	0.180029	0.124859	0.119276	0.166152	0.192848	0.0685218	0.184515	0.270317	0.295442	0.253527	0.224905	0.24844	0.240834	0.149704	0.143762	0.147036
Anthocyanidin_75	Peonidin	芍药花素	Peonidin	芍药花素	301.1	245.3	301.071	Positive	[M]+	C16H13O6+	0	0.00399281	0.00273851	0.00435294	0.00335587	0.00369106	0	0.00532934	0.00425122	0	0	0.00531046	0.00408639	0	0.00402371	0.00334657	0.00382034	0	0.00500022	0.00569318	0.0040306	0.00369481	0.00498235	0.00748917	0.0046054	0.00565896	0.00703423	0.00438338	0	0.0074269	0.00755957	0.00617796	0.00435055	0.0043929	0.00602414	0.00557754	0.00393518	0.00499812	0.00411366
Anthocyanidin_90	Peonidin-3-O-sophoroside	芍药花素-3-O-槐糖苷	Peonidin	芍药花素	625.1	301.1	625.177	Positive	[M]+	C28H33O16+	0.0166798	0.0136461	0.0116474	0.0106908	0.0123243	0.0108675	0.0156457	0.0148117	0.00933521	0.0106069	0.0128508	0.00870175	0.0104981	0.01168	0.00722994	0.0134814	0.0125088	0.0115302	0.00787077	0.0116354	0.0208002	0.0100717	0.0147384	0.0158757	0.011618	0.0065935	0.00745125	0.00555877	0.0103869	0.00705259	0.00788967	0.00919374	0.00879673	0.00683398	0.00740406	0.00519816	0.0152117	0.0130584	0.0123295
Anthocyanidin_78	Peonidin-3,5-O-diglucoside	芍药花素-3,5-O-二葡萄糖苷	Peonidin	芍药花素	625.2	301.1	625.177	Positive	[M]+	C28H33O16+	0	0	0	0	0	0	0	0	0	0	0	0	0	0	0	0	0	0	0.00602443	0	0	0	0	0	0	0.00478669	0	0	0	0.00635581	0.0077264	0.00613105	0	0	0.00673014	0.00813888	0	0	0
Anthocyanidin_86	Peonidin-3-O-glucoside	芍药花素-3-O-葡萄糖苷	Peonidin	芍药花素	463.3	301.1	463.124	Positive	[M]+	C22H23O11+	0.0180854	0.0668819	0.0380419	0.0491802	0.0982755	0.0585914	0.0174235	0.130276	0.139085	0.065296	0.0439112	0.0962972	0.115996	0.0574892	0.094253	0.115636	0.0835796	0.0710976	0.130625	0.205992	0.0877058	0.089617	0.0803645	0.20495	0.172965	0.135632	0.299931	0.220624	0.0950552	0.283119	0.305325	0.28336	0.307553	0.194033	0.251786	0.25176	0.1612	0.161232	0.175454
Anthocyanidin_98	Petunidin-3-O-glucoside	矮牵牛素-3-O-葡萄糖苷	Petunidin	矮牵牛素	479.1	317.1	479.119	Positive	[M]+	C22H23O12+	0.000243427	0	0.00222815	0.0158108	0.00715267	0.00338265	0.00805797	0.00783448	0.0108557	0.0065304	0.00067602	0.0141303	0.00958008	0.000554487	0.00442055	0.0180902	0.000359255	0.00663966	0.0104517	0.0120431	0.00710998	0.0133019	0.0120271	0.00404157	0.013129	0.010656	0.0252905	0.00882024	0.0153172	0.00746834	0.00761476	0.00939729	0.00756325	0.0116756	0.0182296	0.0151025	0.0114925	0.0126665	0.0143677
Anthocyanidin_99	Petunidin-3-O-rutinoside	矮牵牛素-3-O-芸香糖苷	Petunidin	矮牵牛素	625.06	317.1	625.177	Positive	[M]+	C28H33O16+	0	0	0.00106033	0.0106611	0.00933132	0.00174616	0.00434262	0.0105019	0.00765896	0.00191484	0	0.00779541	0.0132142	0.00130246	0.00494334	0.0194376	0	0.0105174	0.00518096	0.00695429	0.00186941	0.00476619	0.0059315	0.00303119	0.02979	0.0118984	0.0378579	0.00416082	0.0154039	0.00635751	0.00812492	0.00894507	0.00893116	0.0137102	0.017398	0.0162989	0.0145701	0.0152205	0.0110242
Anthocyanidin_107	Procyanidin B3	原花青素B3	Procyanidin	原花青素	579.1	427.1	578.142	Positive	[M+H]+	C30H26O12	25.5941	27.6167	30.5625	33.2639	35.0674	35.0376	30.6529	42.7436	37.498	34.147	33.0857	33.2288	46.0837	32.1648	35.1694	48.0943	34.2623	39.2236	40.9028	41.3247	34.007	32.3917	37.2722	41.6722	57.301	41.7478	77.4433	43.6419	49.2545	42.317	47.674	53.5265	48.5422	57.3298	66.8749	59.0836	50.9182	49.9486	49.6514
Anthocyanidin_106	Procyanidin B2	原花青素B2	Procyanidin	原花青素	579.1	427.1	578.142	Positive	[M+H]+	C30H26O12	0.394739	0.574659	0.579629	0.532467	0.625275	0.673241	0.545734	0.644631	0.536346	0.636263	0.63658	0.538535	0.736129	0.602953	0.624882	0.790418	0.626994	0.625702	0.649039	0.515038	0.618602	0.5717	0.624834	0.799865	1.08107	0.706417	1.78385	0.679861	0.944412	0.810018	0.660939	0.940099	0.785535	0.999556	1.22774	0.928691	0.925284	0.91014	0.863356
Anthocyanidin_109	Procyanidin B4	原花青素B4	Procyanidin	原花青素	579.1	291.1	578.142	Positive	[M+H]+	C30H26O12	0	0.0399084	0	0	0	0.0350771	0	0	0	0	0	0	0	0	0	0	0	0.0449554	0	0	0	0	0	0	0	0	0.103479	0.0345879	0	0	0.0614577	0.0856939	0.0657331	0.0689521	0	0	0	0	0
Anthocyanidin_105	Procyanidin B1	原花青素B1	Procyanidin	原花青素	579.1	427.1	578.142	Positive	[M+H]+	C30H26O12	0.220121	0.363703	0.266942	0.304	0.321322	0.34507	0.398045	0.352301	0.277246	0.322134	0.282871	0.33107	0.391752	0.29757	0.263446	0.369531	0.327808	0.384835	0.385337	0.432747	0.325571	0.324596	0.425489	0.467829	0.624193	0.426992	0.887782	0.450123	0.454768	0.441255	0.410486	0.414036	0.370798	0.457903	0.515671	0.468579	0.491876	0.49243	0.452772
Anthocyanidin_39	Naringenin	柚皮素	flavonoid	黄酮	273	153.1	272.068	Positive	[M+H]+	C15H12O5	0.0104888	0.0179627	0.0211431	0.0108473	0.0132355	0.0110787	0.00802178	0.0167572	0.0126127	0.00985877	0.00942938	0.0144451	0.0171588	0.00958356	0.020732	0.0141049	0.0137534	0.0129304	0.0171931	0.0140929	0.0109308	0.00821497	0.0088832	0.0181161	0.0127754	0.0132635	0.0128968	0.0200658	0.0107804	0.0180609	0.0240285	0.0337178	0.0265849	0.0249286	0.0265521	0.0232958	0.0327536	0.0280156	0.0268958
[truncated: 48 more columns]
