# Supplementary material for: Muti-omics revealed the global response of Hordeum vulgare to different wavelength of UV exposure
Source: Research Square preprint supplement (doi:10.21203/rs.3.rs-5763885/v1), 2025-04-23
Supplement: Supplementary file 6 [file deface9b6259cf0c1bce1db1.xlsx]

## Sheet: CC
GO ID	Description	out (50)	All (2738)	pvalue	p.adjust	Genes
GO:0032586	protein storage vacuole membrane	1	1	0.0182615	0.54523	A0A287Q7U2
GO:0000221	vacuolar proton-transporting V-type ATPase, V1 domain	1	2	0.0361961	0.54523	F2CQ37
GO:0009705	plant-type vacuole membrane	1	2	0.0361961	0.54523	A0A287Q7U2
GO:0071020	post-spliceosomal complex	1	2	0.0361961	0.54523	F2D0F3
GO:0009368	endopeptidase Clp complex	1	3	0.0538095	0.54523	F2D539
GO:0005774	vacuolar membrane	2	21	0.0550408	0.54523	A0A287Q7U2;F2CQ37
GO:0044437	vacuolar part	2	21	0.0550408	0.54523	A0A287Q7U2;F2CQ37
GO:0016469	proton-transporting two-sector ATPase complex	2	24	0.069893	0.54523	F2CQ37;F2CWA1
GO:0000276	mitochondrial proton-transporting ATP synthase complex, coupling factor F(o)	1	4	0.0711073	0.54523	F2CWA1
GO:0000315	organellar large ribosomal subunit	1	4	0.0711073	0.54523	F2EIG1
GO:0005762	mitochondrial large ribosomal subunit	1	4	0.0711073	0.54523	F2EIG1
GO:0005785	signal recognition particle receptor complex	1	4	0.0711073	0.54523	F2DVC1
GO:0005967	mitochondrial pyruvate dehydrogenase complex	1	4	0.0711073	0.54523	A0A8I7BJ09
GO:0044613	nuclear pore central transport channel	1	4	0.0711073	0.54523	A0A8I6Y060
GO:0071014	post-mRNA release spliceosomal complex	1	4	0.0711073	0.54523	F2D0F3
GO:0000313	organellar ribosome	1	5	0.0880951	0.54523	F2EIG1
GO:0000325	plant-type vacuole	1	5	0.0880951	0.54523	A0A287Q7U2
GO:0005761	mitochondrial ribosome	1	5	0.0880951	0.54523	F2EIG1
GO:0033180	proton-transporting V-type ATPase, V1 domain	1	5	0.0880951	0.54523	F2CQ37
GO:0034098	VCP-NPL4-UFD1 AAA ATPase complex	1	5	0.0880951	0.54523	A0A8I6Y3B8
GO:0045263	proton-transporting ATP synthase complex, coupling factor F(o)	1	5	0.0880951	0.54523	F2CWA1
GO:0044429	mitochondrial part	6	173	0.0921438	0.54523	A0A8I6WRY7;A0A8I7BJ09;F2CWA1;F2D8E6;F2DUK4;F2EIG1
GO:0005765	lysosomal membrane	1	6	0.104778	0.54523	F2CQ37
GO:0016471	vacuolar proton-transporting V-type ATPase complex	1	6	0.104778	0.54523	F2CQ37
GO:0030139	endocytic vesicle	1	6	0.104778	0.54523	A0A287Q7U2
GO:0098852	lytic vacuole membrane	1	6	0.104778	0.54523	F2CQ37
GO:0005773	vacuole	3	64	0.110014	0.54523	A0A287Q7U2;A0A8I6YH11;F2CQ37
GO:0000974	Prp19 complex	1	7	0.121162	0.54523	F2D0F3
GO:0005769	early endosome	1	7	0.121162	0.54523	F2DC93
GO:0005778	peroxisomal membrane	1	7	0.121162	0.54523	A0A8I6YEH6
GO:0005782	peroxisomal matrix	1	7	0.121162	0.54523	A0A8I6YEH6
GO:0031903	microbody membrane	1	7	0.121162	0.54523	A0A8I6YEH6
GO:0031907	microbody lumen	1	7	0.121162	0.54523	A0A8I6YEH6
GO:0045254	pyruvate dehydrogenase complex	1	7	0.121162	0.54523	A0A8I7BJ09
GO:0033177	proton-transporting two-sector ATPase complex, proton-transporting domain	1	8	0.137252	0.599799	F2CWA1
GO:0005768	endosome	3	73	0.146915	0.599799	A0A287Q7U2;F2DA66;F2DC93
GO:0005623	cell	47	2422	0.153793	0.599799	A0A287K5X8;A0A287MLU2;A0A287P008;A0A287Q7U2;A0A8I6WAB6;A0A8I6WDS1;A0A8I6WRY7;A0A8I6WVY4;A0A8I6WWD2;A0A8I6XLS0;A0A8I6XN50;A0A8I6XQR9;A0A8I6XQX4;A0A8I6XVG7;A0A8I6Y060;A0A8I6Y1N8;A0A8I6Y3B8;A0A8I6YEH6;A0A8I6YGF9;A0A8I6YH11;A0A8I6YTB9;A0A8I7B2U1;A0A8I7B8G7;A0A8I7BBK6;A0A8I7BEZ0;A0A8I7BJ09;B5AAU3;F2CQ37;F2CRI6;F2CUF4;F2CVL6;F2CWA1;F2CX02;F2D0F3;F2D539;F2D663;F2D8E6;F2DA66;F2DC93;F2DIB4;F2DKK0;F2DNP6;F…
GO:0044464	cell part	47	2422	0.153793	0.599799	A0A287K5X8;A0A287MLU2;A0A287P008;A0A287Q7U2;A0A8I6WAB6;A0A8I6WDS1;A0A8I6WRY7;A0A8I6WVY4;A0A8I6WWD2;A0A8I6XLS0;A0A8I6XN50;A0A8I6XQR9;A0A8I6XQX4;A0A8I6XVG7;A0A8I6Y060;A0A8I6Y1N8;A0A8I6Y3B8;A0A8I6YEH6;A0A8I6YGF9;A0A8I6YH11;A0A8I6YTB9;A0A8I7B2U1;A0A8I7B8G7;A0A8I7BBK6;A0A8I7BEZ0;A0A8I7BJ09;B5AAU3;F2CQ37;F2CRI6;F2CUF4;F2CVL6;F2CWA1;F2CX02;F2D0F3;F2D539;F2D663;F2D8E6;F2DA66;F2DC93;F2DIB4;F2DKK0;F2DNP6;F…
GO:0005886	plasma membrane	4	117	0.163013	0.599799	A0A287P008;A0A287Q7U2;A0A8I6XQR9;A0A8I6YH11
GO:0005771	multivesicular body	1	10	0.168571	0.599799	F2DA66
GO:0005791	rough endoplasmic reticulum	1	10	0.168571	0.599799	F2DVC1
GO:0030867	rough endoplasmic reticulum membrane	1	10	0.168571	0.599799	F2DVC1
GO:0033176	proton-transporting V-type ATPase complex	1	10	0.168571	0.599799	F2CQ37
GO:0005759	mitochondrial matrix	2	42	0.177903	0.609727	A0A8I7BJ09;F2EIG1
GO:0005829	cytosol	13	547	0.182985	0.609727	A0A287K5X8;A0A8I6WWD2;A0A8I6XLS0;A0A8I6XN50;A0A8I6XQX4;A0A8I6YEH6;A0A8I7B2U1;A0A8I7BBK6;B5AAU3;F2CX02;F2D663;F2DC93;F2E2F1
GO:0005753	mitochondrial proton-transporting ATP synthase complex	1	11	0.18381	0.609727	F2CWA1
GO:0098798	mitochondrial protein complex	3	82	0.187302	0.609727	A0A8I7BJ09;F2CWA1;F2DUK4
GO:0015629	actin cytoskeleton	1	12	0.198775	0.628097	A0A287MLU2
GO:0031966	mitochondrial membrane	4	129	0.207433	0.628097	A0A8I6WRY7;F2CWA1;F2D8E6;F2DUK4
GO:0044438	microbody part	1	13	0.213471	0.628097	A0A8I6YEH6
GO:0044439	peroxisomal part	1	13	0.213471	0.628097	A0A8I6YEH6
GO:0045259	proton-transporting ATP synthase complex	1	13	0.213471	0.628097	F2CWA1
GO:0005740	mitochondrial envelope	4	133	0.222999	0.643751	A0A8I6WRY7;F2CWA1;F2D8E6;F2DUK4
GO:0033178	proton-transporting two-sector ATPase complex, catalytic domain	1	15	0.242075	0.685878	F2CQ37
GO:0071944	cell periphery	4	140	0.250971	0.686787	A0A287P008;A0A287Q7U2;A0A8I6XQR9;A0A8I6YH11
GO:0005856	cytoskeleton	2	57	0.279491	0.686787	A0A287MLU2;A0A8I6XN50
GO:0098805	whole membrane	4	147	0.279699	0.686787	A0A287Q7U2;A0A8I6YEH6;F2CQ37;F2D8E6
GO:0031090	organelle membrane	9	392	0.281237	0.686787	A0A287Q7U2;A0A8I6WRY7;A0A8I6Y3B8;A0A8I6YEH6;F2CQ37;F2CWA1;F2D8E6;F2DUK4;F2DVC1
GO:0005622	intracellular	45	2356	0.282347	0.686787	A0A287K5X8;A0A287MLU2;A0A287Q7U2;A0A8I6WAB6;A0A8I6WDS1;A0A8I6WRY7;A0A8I6WVY4;A0A8I6WWD2;A0A8I6XLS0;A0A8I6XN50;A0A8I6XQX4;A0A8I6XVG7;A0A8I6Y060;A0A8I6Y1N8;A0A8I6Y3B8;A0A8I6YEH6;A0A8I6YGF9;A0A8I6YH11;A0A8I6YTB9;A0A8I7B2U1;A0A8I7B8G7;A0A8I7BBK6;A0A8I7BEZ0;A0A8I7BJ09;B5AAU3;F2CQ37;F2CRI6;F2CUF4;F2CVL6;F2CWA1;F2CX02;F2D0F3;F2D539;F2D663;F2D8E6;F2DA66;F2DC93;F2DIB4;F2DKK0;F2DNP6;F2DUK4;F2DVC1;F2E2F1;F2…
GO:0044424	intracellular part	45	2356	0.282347	0.686787	A0A287K5X8;A0A287MLU2;A0A287Q7U2;A0A8I6WAB6;A0A8I6WDS1;A0A8I6WRY7;A0A8I6WVY4;A0A8I6WWD2;A0A8I6XLS0;A0A8I6XN50;A0A8I6XQX4;A0A8I6XVG7;A0A8I6Y060;A0A8I6Y1N8;A0A8I6Y3B8;A0A8I6YEH6;A0A8I6YGF9;A0A8I6YH11;A0A8I6YTB9;A0A8I7B2U1;A0A8I7B8G7;A0A8I7BBK6;A0A8I7BEZ0;A0A8I7BJ09;B5AAU3;F2CQ37;F2CRI6;F2CUF4;F2CVL6;F2CWA1;F2CX02;F2D0F3;F2D539;F2D663;F2D8E6;F2DA66;F2DC93;F2DIB4;F2DKK0;F2DNP6;F2DUK4;F2DVC1;F2E2F1;F2…
GO:0048046	apoplast	1	18	0.283079	0.686787	A0A287VMP5
GO:0015934	large ribosomal subunit	2	58	0.286337	0.686787	F2E2F1;F2EIG1
GO:0005739	mitochondrion	8	345	0.289895	0.686787	A0A8I6WRY7;A0A8I6WVY4;A0A8I6XQX4;A0A8I7BJ09;F2CWA1;F2D8E6;F2DUK4;F2EIG1
GO:0005741	mitochondrial outer membrane	1	19	0.296258	0.686787	F2D8E6
GO:0031967	organelle envelope	5	199	0.296472	0.686787	A0A8I6WRY7;A0A8I6Y060;F2CWA1;F2D8E6;F2DUK4
GO:0031975	envelope	5	199	0.296472	0.686787	A0A8I6WRY7;A0A8I6Y060;F2CWA1;F2D8E6;F2DUK4
GO:0000323	lytic vacuole	1	21	0.321907	0.686787	F2CQ37
GO:0005643	nuclear pore	1	21	0.321907	0.686787	A0A8I6Y060
GO:0005764	lysosome	1	21	0.321907	0.686787	F2CQ37
GO:1990204	oxidoreductase complex	2	64	0.327246	0.686787	A0A8I7BJ09;F2DUK4
GO:0098588	bounding membrane of organelle	6	262	0.343661	0.686787	A0A287Q7U2;A0A8I6Y3B8;A0A8I6YEH6;F2CQ37;F2D8E6;F2DVC1
GO:0005874	microtubule	1	23	0.346639	0.686787	A0A8I6XN50
GO:0005634	nucleus	13	629	0.355881	0.686787	A0A8I6WDS1;A0A8I6Y060;A0A8I6YGF9;A0A8I6YTB9;A0A8I7B2U1;A0A8I7B8G7;A0A8I7BEZ0;F2CVL6;F2D0F3;F2DC93;F2DIB4;F2DNP6;F2EJV3
GO:0099512	supramolecular fiber	1	24	0.358671	0.686787	A0A8I6XN50
GO:0099513	polymeric cytoskeletal fiber	1	24	0.358671	0.686787	A0A8I6XN50
GO:0005681	spliceosomal complex	2	69	0.360915	0.686787	A0A8I6WDS1;F2D0F3
GO:0098800	inner mitochondrial membrane protein complex	2	71	0.374227	0.686787	F2CWA1;F2DUK4
GO:0043233	organelle lumen	4	171	0.381187	0.686787	A0A8I6YEH6;A0A8I7BJ09;F2DIB4;F2EIG1
GO:0070013	intracellular organelle lumen	4	171	0.381187	0.686787	A0A8I6YEH6;A0A8I7BJ09;F2DIB4;F2EIG1
GO:0098796	membrane protein complex	5	226	0.397031	0.686787	A0A8I6Y3B8;F2CQ37;F2CWA1;F2DUK4;F2DVC1
GO:0005838	proteasome regulatory particle	1	28	0.404667	0.686787	F2CRI6
GO:0015630	microtubule cytoskeleton	1	28	0.404667	0.686787	A0A8I6XN50
GO:0022624	proteasome accessory complex	1	28	0.404667	0.686787	F2CRI6
GO:0044446	intracellular organelle part	18	918	0.406149	0.686787	A0A287Q7U2;A0A8I6WDS1;A0A8I6WRY7;A0A8I6XN50;A0A8I6Y060;A0A8I6Y3B8;A0A8I6YEH6;A0A8I7BJ09;F2CQ37;F2CWA1;F2D0F3;F2D8E6;F2DIB4;F2DUK4;F2DVC1;F2E2F1;F2EIG1;F2EJV3
GO:0031974	membrane-enclosed lumen	4	178	0.410925	0.686787	A0A8I6YEH6;A0A8I7BJ09;F2DIB4;F2EIG1
GO:0005911	cell-cell junction	1	29	0.415651	0.686787	A0A8I6YH11
GO:0009506	plasmodesma	1	29	0.415651	0.686787	A0A8I6YH11
GO:0030054	cell junction	1	29	0.415651	0.686787	A0A8I6YH11
GO:0031968	organelle outer membrane	1	29	0.415651	0.686787	F2D8E6
GO:0055044	symplast	1	29	0.415651	0.686787	A0A8I6YH11
GO:0044422	organelle part	18	926	0.423494	0.686787	A0A287Q7U2;A0A8I6WDS1;A0A8I6WRY7;A0A8I6XN50;A0A8I6Y060;A0A8I6Y3B8;A0A8I6YEH6;A0A8I7BJ09;F2CQ37;F2CWA1;F2D0F3;F2D8E6;F2DIB4;F2DUK4;F2DVC1;F2E2F1;F2EIG1;F2EJV3
GO:0044455	mitochondrial membrane part	2	79	0.426328	0.686787	F2CWA1;F2DUK4
GO:0005635	nuclear envelope	1	30	0.426436	0.686787	A0A8I6Y060
GO:0019867	outer membrane	1	30	0.426436	0.686787	F2D8E6
GO:0071013	catalytic step 2 spliceosome	1	30	0.426436	0.686787	F2D0F3
GO:0005615	extracellular space	1	33	0.457635	0.713076	F2CZW3
GO:0005747	mitochondrial respiratory chain complex I	1	33	0.457635	0.713076	F2DUK4
GO:0044430	cytoskeletal part	1	33	0.457635	0.713076	A0A8I6XN50
GO:0030964	NADH dehydrogenase complex	1	34	0.46766	0.713076	F2DUK4
GO:0045271	respiratory chain complex I	1	34	0.46766	0.713076	F2DUK4
GO:0005576	extracellular region	3	139	0.470724	0.713076	A0A287VMP5;A0A8I6XXC3;F2CZW3
GO:0044421	extracellular region part	1	35	0.477504	0.716256	F2CZW3
GO:0000786	nucleosome	1	37	0.496659	0.726855	F2EJV3
GO:0043231	intracellular membrane-bounded organelle	30	1615	0.502485	0.726855	A0A287Q7U2;A0A8I6WDS1;A0A8I6WRY7;A0A8I6WVY4;A0A8I6XQX4;A0A8I6Y060;A0A8I6Y1N8;A0A8I6Y3B8;A0A8I6YEH6;A0A8I6YGF9;A0A8I6YH11;A0A8I6YTB9;A0A8I7B2U1;A0A8I7B8G7;A0A8I7BEZ0;A0A8I7BJ09;F2CQ37;F2CVL6;F2CWA1;F2D0F3;F2D539;F2D8E6;F2DA66;F2DC93;F2DIB4;F2DNP6;F2DUK4;F2DVC1;F2EIG1;F2EJV3
GO:0044815	DNA packaging complex	1	38	0.505976	0.726855	F2EJV3
GO:0043227	membrane-bounded organelle	30	1620	0.51311	0.726855	A0A287Q7U2;A0A8I6WDS1;A0A8I6WRY7;A0A8I6WVY4;A0A8I6XQX4;A0A8I6Y060;A0A8I6Y1N8;A0A8I6Y3B8;A0A8I6YEH6;A0A8I6YGF9;A0A8I6YH11;A0A8I6YTB9;A0A8I7B2U1;A0A8I7B8G7;A0A8I7BEZ0;A0A8I7BJ09;F2CQ37;F2CVL6;F2CWA1;F2D0F3;F2D539;F2D8E6;F2DA66;F2DC93;F2DIB4;F2DNP6;F2DUK4;F2DVC1;F2EIG1;F2EJV3
GO:0043229	intracellular organelle	33	1785	0.517428	0.726855	A0A287MLU2;A0A287Q7U2;A0A8I6WDS1;A0A8I6WRY7;A0A8I6WVY4;A0A8I6XN50;A0A8I6XQX4;A0A8I6Y060;A0A8I6Y1N8;A0A8I6Y3B8;A0A8I6YEH6;A0A8I6YGF9;A0A8I6YH11;A0A8I6YTB9;A0A8I7B2U1;A0A8I7B8G7;A0A8I7BEZ0;A0A8I7BJ09;F2CQ37;F2CVL6;F2CWA1;F2D0F3;F2D539;F2D8E6;F2DA66;F2DC93;F2DIB4;F2DNP6;F2DUK4;F2DVC1;F2E2F1;F2EIG1;F2EJV3
GO:0044391	ribosomal subunit	2	94	0.517725	0.726855	F2E2F1;F2EIG1
GO:0005737	cytoplasm	36	1948	0.517825	0.726855	A0A287K5X8;A0A287MLU2;A0A287Q7U2;A0A8I6WAB6;A0A8I6WRY7;A0A8I6WVY4;A0A8I6WWD2;A0A8I6XLS0;A0A8I6XN50;A0A8I6XQX4;A0A8I6XVG7;A0A8I6Y060;A0A8I6Y1N8;A0A8I6Y3B8;A0A8I6YEH6;A0A8I6YH11;A0A8I7B2U1;A0A8I7BBK6;A0A8I7BEZ0;A0A8I7BJ09;B5AAU3;F2CQ37;F2CUF4;F2CVL6;F2CWA1;F2CX02;F2D539;F2D663;F2D8E6;F2DA66;F2DC93;F2DKK0;F2DUK4;F2DVC1;F2E2F1;F2EIG1
GO:0043226	organelle	33	1790	0.528395	0.734949	A0A287MLU2;A0A287Q7U2;A0A8I6WDS1;A0A8I6WRY7;A0A8I6WVY4;A0A8I6XN50;A0A8I6XQX4;A0A8I6Y060;A0A8I6Y1N8;A0A8I6Y3B8;A0A8I6YEH6;A0A8I6YGF9;A0A8I6YH11;A0A8I6YTB9;A0A8I7B2U1;A0A8I7B8G7;A0A8I7BEZ0;A0A8I7BJ09;F2CQ37;F2CVL6;F2CWA1;F2D0F3;F2D539;F2D8E6;F2DA66;F2DC93;F2DIB4;F2DNP6;F2DUK4;F2DVC1;F2E2F1;F2EIG1;F2EJV3
GO:0032993	protein-DNA complex	1	42	0.541586	0.74651	F2EJV3
GO:0043234	protein complex	11	602	0.555301	0.754601	A0A8I6Y060;A0A8I6Y3B8;A0A8I7BJ09;F2CQ37;F2CRI6;F2CWA1;F2D0F3;F2D539;F2DUK4;F2DVC1;F2EJV3
GO:1990904	ribonucleoprotein complex	5	270	0.55732	0.754601	A0A8I6WDS1;F2D0F3;F2DIB4;F2E2F1;F2EIG1
GO:0044444	cytoplasmic part	28	1535	0.562808	0.755348	A0A287K5X8;A0A287Q7U2;A0A8I6WRY7;A0A8I6WVY4;A0A8I6WWD2;A0A8I6XLS0;A0A8I6XN50;A0A8I6XQX4;A0A8I6Y1N8;A0A8I6Y3B8;A0A8I6YEH6;A0A8I6YH11;A0A8I7B2U1;A0A8I7BBK6;A0A8I7BJ09;B5AAU3;F2CQ37;F2CWA1;F2CX02;F2D539;F2D663;F2D8E6;F2DA66;F2DC93;F2DUK4;F2DVC1;F2E2F1;F2EIG1
GO:0005743	mitochondrial inner membrane	2	103	0.567927	0.75559	F2CWA1;F2DUK4
GO:0005746	mitochondrial respiratory chain	1	47	0.582576	0.757342	F2DUK4
GO:0032991	macromolecular complex	15	836	0.58653	0.757342	A0A8I6WDS1;A0A8I6Y060;A0A8I6Y3B8;A0A8I7BJ09;F2CQ37;F2CRI6;F2CWA1;F2D0F3;F2D539;F2DIB4;F2DUK4;F2DVC1;F2E2F1;F2EIG1;F2EJV3
GO:0005789	endoplasmic reticulum membrane	2	107	0.589043	0.757342	A0A8I6Y3B8;F2DVC1
GO:0042175	nuclear outer membrane-endoplasmic reticulum membrane network	2	107	0.589043	0.757342	A0A8I6Y3B8;F2DVC1
GO:0044428	nuclear part	4	226	0.602066	0.75926	A0A8I6WDS1;A0A8I6Y060;F2D0F3;F2DIB4
GO:0019866	organelle inner membrane	2	110	0.60439	0.75926	F2CWA1;F2DUK4
GO:0000785	chromatin	1	50	0.605423	0.75926	F2EJV3
GO:0000502	proteasome complex	1	51	0.612762	0.762217	F2CRI6
GO:0098803	respiratory chain complex	1	53	0.627042	0.765846	F2DUK4
GO:0005840	ribosome	2	115	0.629029	0.765846	F2E2F1;F2EIG1
GO:0022625	cytosolic large ribosomal subunit	1	54	0.633988	0.765846	F2E2F1
GO:0005777	peroxisome	1	57	0.654071	0.765846	A0A8I6YEH6
GO:0042579	microbody	1	57	0.654071	0.765846	A0A8I6YEH6
GO:0070469	respiratory chain	1	57	0.654071	0.765846	F2DUK4
GO:0043228	non-membrane-bounded organelle	5	302	0.66073	0.765846	A0A287MLU2;A0A8I6XN50;F2E2F1;F2EIG1;F2EJV3
GO:0043232	intracellular non-membrane-bounded organelle	5	302	0.66073	0.765846	A0A287MLU2;A0A8I6XN50;F2E2F1;F2EIG1;F2EJV3
GO:0044425	membrane part	5	302	0.66073	0.765846	A0A8I6Y3B8;F2CQ37;F2CWA1;F2DUK4;F2DVC1
GO:0030529	intracellular ribonucleoprotein complex	4	248	0.677001	0.775479	A0A8I6WDS1;F2D0F3;F2E2F1;F2EIG1
GO:0044427	chromosomal part	1	61	0.679178	0.775479	F2EJV3
GO:0012505	endomembrane system	7	429	0.688107	0.777256	A0A287Q7U2;A0A8I6Y060;A0A8I6Y1N8;A0A8I6Y3B8;F2DA66;F2DC93;F2DVC1
GO:0005694	chromosome	1	63	0.691053	0.777256	F2EJV3
GO:0044432	endoplasmic reticulum part	2	130	0.695974	0.777256	A0A8I6Y3B8;F2DVC1
GO:0005654	nucleoplasm	1	66	0.708061	0.785025	F2DIB4
GO:0000139	Golgi membrane	1	72	0.739371	0.81384	A0A287Q7U2
GO:1902494	catalytic complex	2	146	0.756344	0.826576	A0A8I7BJ09;F2DUK4
GO:0016023	cytoplasmic, membrane-bounded vesicle	1	82	0.784395	0.84612	A0A287Q7U2
GO:0031988	membrane-bounded vesicle	1	84	0.792438	0.84612	A0A287Q7U2
GO:0005783	endoplasmic reticulum	3	225	0.792469	0.84612	A0A8I6Y1N8;A0A8I6Y3B8;F2DVC1
GO:0031410	cytoplasmic vesicle	1	85	0.796349	0.84612	A0A287Q7U2
GO:0022626	cytosolic ribosome	1	88	0.807651	0.850178	F2E2F1
GO:0031982	vesicle	1	89	0.811281	0.850178	A0A287Q7U2
GO:0044431	Golgi apparatus part	1	98	0.841064	0.875393	A0A287Q7U2
GO:0031981	nuclear lumen	1	109	0.871264	0.900698	F2DIB4
GO:0044445	cytosolic part	1	115	0.885286	0.909052	F2E2F1
GO:0016020	membrane	12	862	0.906479	0.924609	A0A287P008;A0A287Q7U2;A0A8I6WRY7;A0A8I6XQR9;A0A8I6Y3B8;A0A8I6YEH6;A0A8I6YH11;F2CQ37;F2CWA1;F2D8E6;F2DUK4;F2DVC1
GO:0005794	Golgi apparatus	1	154	0.946145	0.958677	A0A287Q7U2
GO:0009536	plastid	1	215	0.983878	0.990351	F2D539
GO:0005575	cellular_component	50	2738	1	1	A0A287K5X8;A0A287MLU2;A0A287P008;A0A287Q7U2;A0A287VMP5;A0A8I6WAB6;A0A8I6WDS1;A0A8I6WRY7;A0A8I6WVY4;A0A8I6WWD2;A0A8I6XLS0;A0A8I6XN50;A0A8I6XQR9;A0A8I6XQX4;A0A8I6XVG7;A0A8I6XXC3;A0A8I6Y060;A0A8I6Y1N8;A0A8I6Y3B8;A0A8I6YEH6;A0A8I6YGF9;A0A8I6YH11;A0A8I6YTB9;A0A8I7B2U1;A0A8I7B8G7;A0A8I7BBK6;A0A8I7BEZ0;A0A8I7BJ09;B5AAU3;F2CQ37;F2CRI6;F2CUF4;F2CVL6;F2CWA1;F2CX02;F2CZW3;F2D0F3;F2D539;F2D663;F2D8E6;F2DA66;…

## Sheet: MF
GO ID	Description	out (52)	All (2874)	pvalue	p.adjust	Genes
GO:0004843	thiol-dependent ubiquitin-specific protease activity	4	16	0.000147802	0.0142733	A0A8I7B2U1;A0A8I7B344;F2DC93;F2DNP6
GO:0036459	thiol-dependent ubiquitinyl hydrolase activity	4	16	0.000147802	0.0142733	A0A8I7B2U1;A0A8I7B344;F2DC93;F2DNP6
GO:0019783	ubiquitin-like protein-specific protease activity	4	17	0.000190703	0.0142733	A0A8I7B2U1;A0A8I7B344;F2DC93;F2DNP6
GO:0101005	ubiquitinyl hydrolase activity	4	18	0.000241921	0.0142733	A0A8I7B2U1;A0A8I7B344;F2DC93;F2DNP6
GO:1990380	Lys48-specific deubiquitinase activity	2	3	0.000952363	0.0449515	A0A8I7B344;F2DNP6
GO:0005102	receptor binding	2	4	0.00188265	0.0740507	A0A8I6XVG7;F2CZW3
GO:0008234	cysteine-type peptidase activity	4	33	0.00264664	0.0892296	A0A8I7B2U1;A0A8I7B344;F2DC93;F2DNP6
GO:0016787	hydrolase activity	21	670	0.00420716	0.124111	A0A287Q7U2;A0A287TTV1;A0A287VMP5;A0A8I6WK45;A0A8I6WVY4;A0A8I6WVZ1;A0A8I6WWD2;A0A8I6XAW1;A0A8I6XP65;A0A8I6XQR9;A0A8I6XQX4;A0A8I6ZA35;A0A8I7B2U1;A0A8I7B344;F2CQ37;F2CVL6;F2CWA1;F2D539;F2D663;F2DC93;F2DNP6
GO:0038023	signaling receptor activity	2	11	0.0159114	0.154849	A0A287P008;A0A8I7BEZ0
GO:0019829	cation-transporting ATPase activity	3	31	0.017576	0.154849	A0A8I6XQR9;F2CQ37;F2CWA1
GO:0042625	ATPase coupled ion transmembrane transporter activity	3	31	0.017576	0.154849	A0A8I6XQR9;F2CQ37;F2CWA1
GO:0004107	chorismate synthase activity	1	1	0.0180932	0.154849	B5AAU3
GO:0005052	peroxisome matrix targeting signal-1 binding	1	1	0.0180932	0.154849	A0A8I6YEH6
GO:0005125	cytokine activity	1	1	0.0180932	0.154849	F2CZW3
GO:0005126	cytokine receptor binding	1	1	0.0180932	0.154849	A0A8I6XVG7
GO:0005172	vascular endothelial growth factor receptor binding	1	1	0.0180932	0.154849	A0A8I6XVG7
GO:0016278	lysine N-methyltransferase activity	1	1	0.0180932	0.154849	F2DKK0
GO:0016279	protein-lysine N-methyltransferase activity	1	1	0.0180932	0.154849	F2DKK0
GO:0016920	pyroglutamyl-peptidase activity	1	1	0.0180932	0.154849	F2D663
GO:0018738	S-formylglutathione hydrolase activity	1	1	0.0180932	0.154849	A0A8I6WWD2
GO:0043184	vascular endothelial growth factor receptor 2 binding	1	1	0.0180932	0.154849	A0A8I6XVG7
GO:0045544	gibberellin 20-oxidase activity	1	1	0.0180932	0.154849	Q673G6
GO:0048487	beta-tubulin binding	1	1	0.0180932	0.154849	A0A8I6XN50
GO:0070851	growth factor receptor binding	1	1	0.0180932	0.154849	A0A8I6XVG7
GO:0004872	receptor activity	2	12	0.0188745	0.154849	A0A287P008;A0A8I7BEZ0
GO:0060089	molecular transducer activity	2	12	0.0188745	0.154849	A0A287P008;A0A8I7BEZ0
GO:0016820	hydrolase activity, acting on acid anhydrides, catalyzing transmembrane movement of substances	3	32	0.0191504	0.154849	A0A8I6XQR9;F2CQ37;F2CWA1
GO:0042626	ATPase activity, coupled to transmembrane movement of substances	3	32	0.0191504	0.154849	A0A8I6XQR9;F2CQ37;F2CWA1
GO:0043492	ATPase activity, coupled to movement of substances	3	32	0.0191504	0.154849	A0A8I6XQR9;F2CQ37;F2CWA1
GO:0042623	ATPase activity, coupled	4	58	0.0196842	0.154849	A0A8I6XQR9;F2CQ37;F2CWA1;F2D539
GO:0022892	substrate-specific transporter activity	6	121	0.0205093	0.156135	A0A8I6XQR9;A0A8I6Y060;A0A8I6YH11;F2CQ37;F2CWA1;F2D8E6
GO:0015078	hydrogen ion transmembrane transporter activity	3	34	0.0225273	0.166139	A0A8I6XQR9;F2CQ37;F2CWA1
GO:0015077	monovalent inorganic cation transmembrane transporter activity	3	35	0.0243301	0.173997	A0A8I6XQR9;F2CQ37;F2CWA1
GO:0033293	monocarboxylic acid binding	2	14	0.0254311	0.176521	A0A8I6XTL4;A0A8I7BEZ0
GO:0015399	primary active transmembrane transporter activity	3	37	0.0281644	0.17848	A0A8I6XQR9;F2CQ37;F2CWA1
GO:0015405	P-P-bond-hydrolysis-driven transmembrane transporter activity	3	37	0.0281644	0.17848	A0A8I6XQR9;F2CQ37;F2CWA1
GO:0022891	substrate-specific transmembrane transporter activity	5	100	0.0328607	0.17848	A0A8I6XQR9;A0A8I6YH11;F2CQ37;F2CWA1;F2D8E6
GO:0022890	inorganic cation transmembrane transporter activity	3	40	0.0344854	0.17848	A0A8I6XQR9;F2CQ37;F2CWA1
GO:0005215	transporter activity	6	137	0.0352023	0.17848	A0A8I6XQR9;A0A8I6Y060;A0A8I6YH11;F2CQ37;F2CWA1;F2D8E6
GO:0003960	NADPH:quinone reductase activity	1	2	0.0358653	0.17848	A0A8I6XLS0
GO:0004477	methenyltetrahydrofolate cyclohydrolase activity	1	2	0.0358653	0.17848	A0A8I6XQX4
GO:0004488	methylenetetrahydrofolate dehydrogenase (NADP+) activity	1	2	0.0358653	0.17848	A0A8I6XQX4
GO:0008934	inositol monophosphate 1-phosphatase activity	1	2	0.0358653	0.17848	A0A287TTV1
GO:0050178	phenylpyruvate tautomerase activity	1	2	0.0358653	0.17848	F2CZW3
GO:0052832	inositol monophosphate 3-phosphatase activity	1	2	0.0358653	0.17848	A0A287TTV1
GO:0052833	inositol monophosphate 4-phosphatase activity	1	2	0.0358653	0.17848	A0A287TTV1
GO:0052834	inositol monophosphate phosphatase activity	1	2	0.0358653	0.17848	A0A287TTV1
GO:0070011	peptidase activity, acting on L-amino acid peptides	6	138	0.0363009	0.17848	A0A8I7B2U1;A0A8I7B344;F2D539;F2D663;F2DC93;F2DNP6
GO:0015075	ion transmembrane transporter activity	4	71	0.0379778	0.182913	A0A8I6XQR9;F2CQ37;F2CWA1;F2D8E6
GO:0008233	peptidase activity	6	141	0.0397301	0.185346	A0A8I7B2U1;A0A8I7B344;F2D539;F2D663;F2DC93;F2DNP6
GO:0004871	signal transducer activity	2	18	0.0408391	0.185346	A0A287P008;A0A8I7BEZ0
GO:0036442	hydrogen-exporting ATPase activity	2	18	0.0408391	0.185346	A0A8I6XQR9;F2CQ37
GO:0008324	cation transmembrane transporter activity	3	45	0.0465163	0.193599	A0A8I6XQR9;F2CQ37;F2CWA1
GO:0000268	peroxisome targeting sequence binding	1	3	0.0533218	0.193599	A0A8I6YEH6
GO:0004066	asparagine synthase (glutamine-hydrolyzing) activity	1	3	0.0533218	0.193599	A0A287K5X8
GO:0004556	alpha-amylase activity	1	3	0.0533218	0.193599	A0A8I6XP65
GO:0004714	transmembrane receptor protein tyrosine kinase activity	1	3	0.0533218	0.193599	A0A287P008
GO:0004888	transmembrane signaling receptor activity	1	3	0.0533218	0.193599	A0A287P008
GO:0008242	omega peptidase activity	1	3	0.0533218	0.193599	F2D663
GO:0008553	hydrogen-exporting ATPase activity, phosphorylative mechanism	1	3	0.0533218	0.193599	A0A8I6XQR9
GO:0016862	intramolecular oxidoreductase activity, interconverting keto- and enol-groups	1	3	0.0533218	0.193599	F2CZW3
GO:0019199	transmembrane receptor protein kinase activity	1	3	0.0533218	0.193599	A0A287P008
GO:0052745	inositol phosphate phosphatase activity	1	3	0.0533218	0.193599	A0A287TTV1
GO:0070402	NADPH binding	1	3	0.0533218	0.193599	A0A8I6XLS0
GO:0099600	transmembrane receptor activity	1	3	0.0533218	0.193599	A0A287P008
GO:0022857	transmembrane transporter activity	5	116	0.0564229	0.201755	A0A8I6XQR9;A0A8I6YH11;F2CQ37;F2CWA1;F2D8E6
GO:0015267	channel activity	2	23	0.0637865	0.215052	A0A8I6YH11;F2D8E6
GO:0022803	passive transmembrane transporter activity	2	23	0.0637865	0.215052	A0A8I6YH11;F2D8E6
GO:0022838	substrate-specific channel activity	2	23	0.0637865	0.215052	A0A8I6YH11;F2D8E6
GO:0044769	ATPase activity, coupled to transmembrane movement of ions, rotational mechanism	2	23	0.0637865	0.215052	F2CQ37;F2CWA1
GO:0005546	phosphatidylinositol-4,5-bisphosphate binding	1	4	0.0704682	0.22384	A0A287MLU2
GO:0016838	carbon-oxygen lyase activity, acting on phosphates	1	4	0.0704682	0.22384	B5AAU3
GO:0016843	amine-lyase activity	1	4	0.0704682	0.22384	F2DUQ7
GO:0017057	6-phosphogluconolactonase activity	1	4	0.0704682	0.22384	A0A8I6ZA35
GO:0016788	hydrolase activity, acting on ester bonds	5	124	0.0711356	0.22384	A0A287TTV1;A0A287VMP5;A0A8I6WWD2;A0A8I6ZA35;F2CVL6
GO:0022804	active transmembrane transporter activity	3	56	0.0792177	0.241502	A0A8I6XQR9;F2CQ37;F2CWA1
GO:0017111	nucleoside-triphosphatase activity	7	210	0.0811215	0.241502	A0A287Q7U2;A0A8I6WVY4;A0A8I6WVZ1;A0A8I6XQR9;F2CQ37;F2CWA1;F2D539
GO:0004176	ATP-dependent peptidase activity	1	5	0.0873099	0.241502	F2D539
GO:0004650	polygalacturonase activity	1	5	0.0873099	0.241502	A0A8I6XAW1
GO:0004713	protein tyrosine kinase activity	1	5	0.0873099	0.241502	A0A287P008
GO:0005253	anion channel activity	1	5	0.0873099	0.241502	F2D8E6
GO:0008308	voltage-gated anion channel activity	1	5	0.0873099	0.241502	F2D8E6
GO:0019238	cyclohydrolase activity	1	5	0.0873099	0.241502	A0A8I6XQX4
GO:0051117	ATPase binding	1	5	0.0873099	0.241502	F2D539
GO:1902936	phosphatidylinositol bisphosphate binding	1	5	0.0873099	0.241502	A0A287MLU2
GO:0031406	carboxylic acid binding	2	28	0.0900515	0.241502	A0A8I6XTL4;A0A8I7BEZ0
GO:0043177	organic acid binding	2	28	0.0900515	0.241502	A0A8I6XTL4;A0A8I7BEZ0
GO:0052689	carboxylic ester hydrolase activity	2	28	0.0900515	0.241502	A0A8I6WWD2;A0A8I6ZA35
GO:0004738	pyruvate dehydrogenase activity	1	6	0.103852	0.255818	A0A8I7BJ09
GO:0004739	pyruvate dehydrogenase (acetyl-transferring) activity	1	6	0.103852	0.255818	A0A8I7BJ09
GO:0010427	abscisic acid binding	1	6	0.103852	0.255818	A0A8I7BEZ0
GO:0016790	thiolester hydrolase activity	1	6	0.103852	0.255818	A0A8I6WWD2
GO:0019840	isoprenoid binding	1	6	0.103852	0.255818	A0A8I7BEZ0
GO:0019887	protein kinase regulator activity	1	6	0.103852	0.255818	A0A8I7BBK6
GO:1901981	phosphatidylinositol phosphate binding	1	6	0.103852	0.255818	A0A287MLU2
GO:0008289	lipid binding	3	63	0.104062	0.255818	A0A287MLU2;A0A8I6XTL4;A0A8I7BEZ0
GO:0016462	pyrophosphatase activity	7	229	0.115452	0.26994	A0A287Q7U2;A0A8I6WVY4;A0A8I6WVZ1;A0A8I6XQR9;F2CQ37;F2CWA1;F2D539
GO:0016818	hydrolase activity, acting on acid anhydrides, in phosphorus-containing anhydrides	7	231	0.119464	0.26994	A0A287Q7U2;A0A8I6WVY4;A0A8I6WVZ1;A0A8I6XQR9;F2CQ37;F2CWA1;F2D539
GO:0005244	voltage-gated ion channel activity	1	7	0.1201	0.26994	F2D8E6
GO:0015662	ATPase activity, coupled to transmembrane movement of ions, phosphorylative mechanism	1	7	0.1201	0.26994	A0A8I6XQR9
GO:0016646	oxidoreductase activity, acting on the CH-NH group of donors, NAD or NADP as acceptor	1	7	0.1201	0.26994	A0A8I6XQX4
GO:0019207	kinase regulator activity	1	7	0.1201	0.26994	A0A8I7BBK6
GO:0022832	voltage-gated channel activity	1	7	0.1201	0.26994	F2D8E6
GO:0022836	gated channel activity	1	7	0.1201	0.26994	F2D8E6
GO:0042562	hormone binding	1	7	0.1201	0.26994	A0A8I7BEZ0
GO:0016817	hydrolase activity, acting on acid anhydrides	7	233	0.12355	0.275074	A0A287Q7U2;A0A8I6WVY4;A0A8I6WVZ1;A0A8I6XQR9;F2CQ37;F2CWA1;F2D539
GO:0008092	cytoskeletal protein binding	2	34	0.124927	0.275539	A0A287MLU2;A0A8I6XN50
GO:0005504	fatty acid binding	1	8	0.136059	0.28928	A0A8I6XTL4
GO:0016160	amylase activity	1	8	0.136059	0.28928	A0A8I6XP65
GO:0016624	oxidoreductase activity, acting on the aldehyde or oxo group of donors, disulfide as acceptor	1	8	0.136059	0.28928	A0A8I7BJ09
GO:0016884	carbon-nitrogen ligase activity, with glutamine as amido-N-donor	1	8	0.136059	0.28928	A0A287K5X8
GO:0016887	ATPase activity	4	113	0.145719	0.300919	A0A8I6XQR9;F2CQ37;F2CWA1;F2D539
GO:0004864	protein phosphatase inhibitor activity	1	9	0.151735	0.300919	A0A8I7BEZ0
GO:0005216	ion channel activity	1	9	0.151735	0.300919	F2D8E6
GO:0008170	N-methyltransferase activity	1	9	0.151735	0.300919	F2DKK0
GO:0008276	protein methyltransferase activity	1	9	0.151735	0.300919	F2DKK0
GO:0016814	hydrolase activity, acting on carbon-nitrogen (but not peptide) bonds, in cyclic amidines	1	9	0.151735	0.300919	A0A8I6XQX4
GO:0016840	carbon-nitrogen lyase activity	1	9	0.151735	0.300919	F2DUQ7
GO:0019212	phosphatase inhibitor activity	1	9	0.151735	0.300919	A0A8I7BEZ0
GO:0004519	endonuclease activity	1	10	0.167131	0.325974	F2CVL6
GO:0004521	endoribonuclease activity	1	10	0.167131	0.325974	F2CVL6
GO:0016645	oxidoreductase activity, acting on the CH-NH group of donors	1	11	0.182253	0.346868	A0A8I6XQX4
GO:0044183	protein binding involved in protein folding	1	11	0.182253	0.346868	A0A8I6XVG7
GO:0061608	nuclear import signal receptor activity	1	11	0.182253	0.346868	A0A8I6Y060
GO:0003677	DNA binding	4	126	0.191775	0.362071	A0A8I6YTB9;A0A8I7B8G7;F2CVL6;F2EJV3
GO:0016706	oxidoreductase activity, acting on paired donors, with incorporation or reduction of molecular oxygen, 2-oxoglutarate as one donor, and incorporation of one atom each of oxygen into both donors	1	12	0.197105	0.363413	Q673G6
GO:0043178	alcohol binding	1	12	0.197105	0.363413	A0A8I7BEZ0
GO:0046933	proton-transporting ATP synthase activity, rotational mechanism	1	12	0.197105	0.363413	F2CWA1
GO:0043130	ubiquitin binding	2	46	0.201732	0.369059	A0A8I6Y3B8;F2DNP6
GO:0032182	ubiquitin-like protein binding	2	47	0.208393	0.378314	A0A8I6Y3B8;F2DNP6
GO:0051015	actin filament binding	1	13	0.211693	0.381371	A0A287MLU2
GO:0005372	water transmembrane transporter activity	1	14	0.226021	0.40106	A0A8I6YH11
GO:0015250	water channel activity	1	14	0.226021	0.40106	A0A8I6YH11
GO:0004540	ribonuclease activity	1	15	0.240093	0.416632	F2CVL6
GO:0005487	nucleocytoplasmic transporter activity	1	15	0.240093	0.416632	A0A8I6Y060
GO:0046961	proton-transporting ATPase activity, rotational mechanism	1	15	0.240093	0.416632	F2CQ37
GO:0005525	GTP binding	3	95	0.245691	0.417144	A0A287Q7U2;A0A8I6WVY4;F2DVC1
GO:0019001	guanyl nucleotide binding	3	95	0.245691	0.417144	A0A287Q7U2;A0A8I6WVY4;F2DVC1
GO:0032561	guanyl ribonucleotide binding	3	95	0.245691	0.417144	A0A287Q7U2;A0A8I6WVY4;F2DVC1
GO:0015631	tubulin binding	1	16	0.253915	0.419048	A0A8I6XN50
GO:0019208	phosphatase regulator activity	1	16	0.253915	0.419048	A0A8I7BEZ0
GO:0019888	protein phosphatase regulator activity	1	16	0.253915	0.419048	A0A8I7BEZ0
GO:0031593	polyubiquitin binding	1	16	0.253915	0.419048	A0A8I6Y3B8
GO:0003746	translation elongation factor activity	1	17	0.267489	0.435362	A0A8I6XEF6
GO:0003779	actin binding	1	17	0.267489	0.435362	A0A287MLU2
GO:0004553	hydrolase activity, hydrolyzing O-glycosyl compounds	3	101	0.275336	0.441826	A0A8I6WK45;A0A8I6XAW1;A0A8I6XP65
GO:0004518	nuclease activity	1	18	0.280822	0.441826	F2CVL6
GO:0010181	FMN binding	1	18	0.280822	0.441826	B5AAU3
GO:0016655	oxidoreductase activity, acting on NAD(P)H, quinone or similar compound as acceptor	1	18	0.280822	0.441826	A0A8I6XLS0
GO:0035091	phosphatidylinositol binding	1	18	0.280822	0.441826	A0A287MLU2
GO:0043022	ribosome binding	1	19	0.293916	0.459365	A0A8I6XEF6
GO:0016798	hydrolase activity, acting on glycosyl bonds	3	107	0.305373	0.470125	A0A8I6WK45;A0A8I6XAW1;A0A8I6XP65
GO:0003724	RNA helicase activity	1	20	0.306776	0.470125	A0A8I6WVZ1
GO:0043565	sequence-specific DNA binding	1	20	0.306776	0.470125	F2CVL6
GO:0008135	translation factor activity, RNA binding	2	62	0.309744	0.47161	A0A8I6WVY4;A0A8I6XEF6
GO:0005509	calcium ion binding	2	67	0.343314	0.519372	A0A8I6XP65;A0A8I6YGF9
GO:0008509	anion transmembrane transporter activity	1	25	0.36771	0.552737	F2D8E6
GO:0004252	serine-type endopeptidase activity	1	26	0.379251	0.559395	F2D539
GO:0005048	signal sequence binding	1	26	0.379251	0.559395	A0A8I6YEH6
GO:0016879	ligase activity, forming carbon-nitrogen bonds	1	26	0.379251	0.559395	A0A287K5X8
GO:0008565	protein transporter activity	1	27	0.390585	0.569	A0A8I6Y060
GO:0050661	NADP binding	1	27	0.390585	0.569	A0A8I6XLS0
GO:0016705	oxidoreductase activity, acting on paired donors, with incorporation or reduction of molecular oxygen	1	28	0.401716	0.581625	Q673G6
GO:0003924	GTPase activity	2	77	0.408825	0.58831	A0A287Q7U2;A0A8I6WVY4
GO:0005515	protein binding	8	391	0.412864	0.590521	A0A287MLU2;A0A8I6XN50;A0A8I6XVG7;A0A8I6Y3B8;F2CZW3;F2D539;F2DNP6;F2EJV3
GO:0005543	phospholipid binding	1	30	0.423383	0.598313	A0A287MLU2
GO:0016903	oxidoreductase activity, acting on the aldehyde or oxo group of donors	1	30	0.423383	0.598313	A0A8I7BJ09
GO:0004386	helicase activity	1	31	0.433926	0.605955	A0A8I6WVZ1
GO:0051213	dioxygenase activity	1	31	0.433926	0.605955	Q673G6
GO:0016860	intramolecular oxidoreductase activity	1	32	0.444279	0.613158	F2CZW3
GO:0043021	ribonucleoprotein complex binding	1	32	0.444279	0.613158	A0A8I6XEF6
GO:0008757	S-adenosylmethionine-dependent methyltransferase activity	1	33	0.454447	0.623544	F2DKK0
GO:0030527	structural constituent of chromatin	1	35	0.474239	0.646939	F2EJV3
GO:0008238	exopeptidase activity	1	36	0.483869	0.656282	F2D663
GO:0044877	macromolecular complex binding	2	90	0.489159	0.659667	A0A287MLU2;A0A8I6XEF6
GO:0008168	methyltransferase activity	1	38	0.502613	0.670151	F2DKK0
GO:0046982	protein heterodimerization activity	1	38	0.502613	0.670151	F2EJV3
GO:0016810	hydrolase activity, acting on carbon-nitrogen (but not peptide) bonds	1	39	0.511733	0.676948	A0A8I6XQX4
GO:0043168	anion binding	12	647	0.515609	0.676948	A0A287K5X8;A0A287MLU2;A0A287P008;A0A287Q7U2;A0A8I6WVY4;A0A8I6WVZ1;A0A8I6XLS0;A0A8I6XQR9;A0A8I6XTL4;A0A8I7BEZ0;B5AAU3;F2DVC1
GO:0003676	nucleic acid binding	10	537	0.516316	0.676948	A0A8I6WDS1;A0A8I6WVY4;A0A8I6WVZ1;A0A8I6XEF6;A0A8I6YTB9;A0A8I7B8G7;A0A8I7BBZ4;F2CVL6;F2DIB4;F2EJV3
GO:0042277	peptide binding	1	40	0.520689	0.678909	A0A8I6YEH6
GO:0003743	translation initiation factor activity	1	41	0.529483	0.686583	A0A8I6WVY4
GO:0016651	oxidoreductase activity, acting on NAD(P)H	1	43	0.546601	0.701075	A0A8I6XLS0
GO:0033218	amide binding	1	43	0.546601	0.701075	A0A8I6YEH6
GO:0016741	transferase activity, transferring one-carbon groups	1	46	0.571137	0.715442	F2DKK0
GO:0016835	carbon-oxygen lyase activity	1	46	0.571137	0.715442	B5AAU3
GO:0003735	structural constituent of ribosome	2	106	0.578484	0.715442	F2E2F1;F2EIG1
GO:0004672	protein kinase activity	1	47	0.579023	0.715442	A0A287P008
GO:0008236	serine-type peptidase activity	1	47	0.579023	0.715442	F2D539
GO:0017171	serine hydrolase activity	1	47	0.579023	0.715442	F2D539
GO:0032403	protein complex binding	1	47	0.579023	0.715442	A0A287MLU2
GO:0019899	enzyme binding	1	49	0.59437	0.73058	F2D539
GO:0016829	lyase activity	2	110	0.599017	0.732477	B5AAU3;F2DUQ7
GO:0036094	small molecule binding	11	634	0.617747	0.751486	A0A287K5X8;A0A287P008;A0A287Q7U2;A0A8I6WVY4;A0A8I6WVZ1;A0A8I6XLS0;A0A8I6XQR9;A0A8I6XTL4;A0A8I7BEZ0;B5AAU3;F2DVC1
GO:0016791	phosphatase activity	1	53	0.623437	0.754518	A0A287TTV1
GO:0005198	structural molecule activity	3	178	0.634725	0.76426	F2E2F1;F2EIG1;F2EJV3
GO:0032553	ribonucleotide binding	8	481	0.661756	0.791976	A0A287K5X8;A0A287P008;A0A287Q7U2;A0A8I6WVY4;A0A8I6WVZ1;A0A8I6XQR9;B5AAU3;F2DVC1
GO:0042578	phosphoric ester hydrolase activity	1	60	0.669466	0.791976	A0A287TTV1
GO:0046983	protein dimerization activity	1	60	0.669466	0.791976	F2EJV3
GO:0003824	catalytic activity	30	1715	0.671167	0.791976	A0A287K5X8;A0A287P008;A0A287Q7U2;A0A287TTV1;A0A287VMP5;A0A8I6WK45;A0A8I6WVY4;A0A8I6WVZ1;A0A8I6WWD2;A0A8I6XAW1;A0A8I6XLS0;A0A8I6XP65;A0A8I6XQR9;A0A8I6XQX4;A0A8I6ZA35;A0A8I7B2U1;A0A8I7B344;A0A8I7BJ09;B5AAU3;F2CQ37;F2CVL6;F2CWA1;F2CZW3;F2D539;F2D663;F2DC93;F2DKK0;F2DNP6;F2DUQ7;Q673G6
GO:0030234	enzyme regulator activity	2	127	0.678098	0.792234	A0A8I7BBK6;A0A8I7BEZ0
GO:0050662	coenzyme binding	2	127	0.678098	0.792234	A0A8I6XLS0;B5AAU3
GO:0097367	carbohydrate derivative binding	8	494	0.692795	0.805417	A0A287K5X8;A0A287P008;A0A287Q7U2;A0A8I6WVY4;A0A8I6WVZ1;A0A8I6XQR9;B5AAU3;F2DVC1
GO:0004857	enzyme inhibitor activity	1	67	0.709964	0.821331	A0A8I7BEZ0
GO:0098772	molecular function regulator	2	138	0.722368	0.831604	A0A8I7BBK6;A0A8I7BEZ0
GO:0004175	endopeptidase activity	1	72	0.735869	0.837532	F2D539
GO:0003723	RNA binding	6	397	0.744056	0.837532	A0A8I6WVY4;A0A8I6WVZ1;A0A8I6XEF6;A0A8I7BBZ4;F2CVL6;F2DIB4
GO:0035639	purine ribonucleoside triphosphate binding	7	461	0.75167	0.837532	A0A287K5X8;A0A287P008;A0A287Q7U2;A0A8I6WVY4;A0A8I6WVZ1;A0A8I6XQR9;F2DVC1
GO:0001882	nucleoside binding	7	463	0.755908	0.837532	A0A287K5X8;A0A287P008;A0A287Q7U2;A0A8I6WVY4;A0A8I6WVZ1;A0A8I6XQR9;F2DVC1
GO:0001883	purine nucleoside binding	7	463	0.755908	0.837532	A0A287K5X8;A0A287P008;A0A287Q7U2;A0A8I6WVY4;A0A8I6WVZ1;A0A8I6XQR9;F2DVC1
GO:0032549	ribonucleoside binding	7	463	0.755908	0.837532	A0A287K5X8;A0A287P008;A0A287Q7U2;A0A8I6WVY4;A0A8I6WVZ1;A0A8I6XQR9;F2DVC1
GO:0032550	purine ribonucleoside binding	7	463	0.755908	0.837532	A0A287K5X8;A0A287P008;A0A287Q7U2;A0A8I6WVY4;A0A8I6WVZ1;A0A8I6XQR9;F2DVC1
GO:0032555	purine ribonucleotide binding	7	463	0.755908	0.837532	A0A287K5X8;A0A287P008;A0A287Q7U2;A0A8I6WVY4;A0A8I6WVZ1;A0A8I6XQR9;F2DVC1
GO:0017076	purine nucleotide binding	7	470	0.770358	0.849553	A0A287K5X8;A0A287P008;A0A287Q7U2;A0A8I6WVY4;A0A8I6WVZ1;A0A8I6XQR9;F2DVC1
GO:0000166	nucleotide binding	9	595	0.779146	0.851289	A0A287K5X8;A0A287P008;A0A287Q7U2;A0A8I6WVY4;A0A8I6WVZ1;A0A8I6XLS0;A0A8I6XQR9;B5AAU3;F2DVC1
GO:1901265	nucleoside phosphate binding	9	595	0.779146	0.851289	A0A287K5X8;A0A287P008;A0A287Q7U2;A0A8I6WVY4;A0A8I6WVZ1;A0A8I6XLS0;A0A8I6XQR9;B5AAU3;F2DVC1
GO:0008270	zinc ion binding	1	83	0.785134	0.853878	A0A8I6WDS1
GO:0016874	ligase activity	1	84	0.789137	0.854295	A0A287K5X8
GO:0043167	ion binding	17	1071	0.796416	0.858238	A0A287K5X8;A0A287MLU2;A0A287P008;A0A287Q7U2;A0A287TTV1;A0A8I6WDS1;A0A8I6WVY4;A0A8I6WVZ1;A0A8I6XLS0;A0A8I6XP65;A0A8I6XQR9;A0A8I6XTL4;A0A8I6YGF9;A0A8I7BEZ0;B5AAU3;F2DVC1;Q673G6
GO:0005488	binding	31	1854	0.814155	0.873366	A0A287K5X8;A0A287MLU2;A0A287P008;A0A287Q7U2;A0A287TTV1;A0A8I6WDS1;A0A8I6WVY4;A0A8I6WVZ1;A0A8I6XEF6;A0A8I6XLS0;A0A8I6XN50;A0A8I6XP65;A0A8I6XQR9;A0A8I6XTL4;A0A8I6XVG7;A0A8I6Y3B8;A0A8I6YEH6;A0A8I6YGF9;A0A8I6YTB9;A0A8I7B8G7;A0A8I7BBZ4;A0A8I7BEZ0;B5AAU3;F2CVL6;F2CZW3;F2D539;F2DIB4;F2DNP6;F2DVC1;F2EJV3;Q673G6
GO:0016773	phosphotransferase activity, alcohol group as acceptor	1	95	0.828621	0.884285	A0A287P008
GO:0016853	isomerase activity	1	96	0.831827	0.884285	F2CZW3
GO:0048037	cofactor binding	2	177	0.840665	0.889672	A0A8I6XLS0;B5AAU3
GO:0016301	kinase activity	1	122	0.897337	0.944153	A0A287P008
GO:1901363	heterocyclic compound binding	17	1159	0.900146	0.944153	A0A287K5X8;A0A287P008;A0A287Q7U2;A0A8I6WDS1;A0A8I6WVY4;A0A8I6WVZ1;A0A8I6XEF6;A0A8I6XLS0;A0A8I6XQR9;A0A8I6YTB9;A0A8I7B8G7;A0A8I7BBZ4;B5AAU3;F2CVL6;F2DIB4;F2DVC1;F2EJV3
GO:0097159	organic cyclic compound binding	17	1164	0.904551	0.944575	A0A287K5X8;A0A287P008;A0A287Q7U2;A0A8I6WDS1;A0A8I6WVY4;A0A8I6WVZ1;A0A8I6XEF6;A0A8I6XLS0;A0A8I6XQR9;A0A8I6YTB9;A0A8I7B8G7;A0A8I7BBZ4;B5AAU3;F2CVL6;F2DIB4;F2DVC1;F2EJV3
GO:0005524	ATP binding	4	368	0.915661	0.95002	A0A287K5X8;A0A287P008;A0A8I6WVZ1;A0A8I6XQR9
GO:0032559	adenyl ribonucleotide binding	4	370	0.917816	0.95002	A0A287K5X8;A0A287P008;A0A8I6WVZ1;A0A8I6XQR9
GO:0030554	adenyl nucleotide binding	4	377	0.924987	0.953262	A0A287K5X8;A0A287P008;A0A8I6WVZ1;A0A8I6XQR9
GO:0046914	transition metal ion binding	1	145	0.933916	0.95668	A0A8I6WDS1
GO:0016772	transferase activity, transferring phosphorus-containing groups	1	147	0.936411	0.95668	A0A287P008
GO:0016491	oxidoreductase activity	4	398	0.943328	0.959593	A0A8I6XLS0;A0A8I6XQX4;A0A8I7BJ09;Q673G6
GO:0046872	metal ion binding	5	534	0.976341	0.988146	A0A287TTV1;A0A8I6WDS1;A0A8I6XP65;A0A8I6YGF9;Q673G6
GO:0043169	cation binding	5	545	0.979772	0.988146	A0A287TTV1;A0A8I6WDS1;A0A8I6XP65;A0A8I6YGF9;Q673G6
GO:0016740	transferase activity	2	422	0.997574	1	A0A287P008;F2DKK0
GO:0003674	molecular_function	52	2874	1	1	A0A287K5X8;A0A287MLU2;A0A287P008;A0A287Q7U2;A0A287TTV1;A0A287VMP5;A0A8I6WDS1;A0A8I6WK45;A0A8I6WVY4;A0A8I6WVZ1;A0A8I6WWD2;A0A8I6XAW1;A0A8I6XEF6;A0A8I6XLS0;A0A8I6XN50;A0A8I6XP65;A0A8I6XQR9;A0A8I6XQX4;A0A8I6XTL4;A0A8I6XVG7;A0A8I6Y060;A0A8I6Y3B8;A0A8I6YEH6;A0A8I6YGF9;A0A8I6YH11;A0A8I6YTB9;A0A8I6ZA35;A0A8I7B2U1;A0A8I7B344;A0A8I7B8G7;A0A8I7BBK6;A0A8I7BBZ4;A0A8I7BEZ0;A0A8I7BJ09;B5AAU3;F2CQ37;F2CVL6;F2CW…

## Sheet: BP
GO ID	Description	out (45)	All (2571)	pvalue	p.adjust	Genes
GO:0043244	regulation of protein complex disassembly	2	6	0.00429794	0.371068	A0A287MLU2;A0A8I6XEF6
GO:0006081	cellular aldehyde metabolic process	4	44	0.00667425	0.371068	A0A8I6WWD2;A0A8I6ZA35;F2CUF4;F2DUQ7
GO:0000076	DNA replication checkpoint	1	1	0.0175029	0.371068	A0A8I6WDS1
GO:0000389	mRNA 3'-splice site recognition	1	1	0.0175029	0.371068	F2D0F3
GO:0030330	DNA damage response, signal transduction by p53 class mediator	1	1	0.0175029	0.371068	F2DC93
GO:0033314	mitotic DNA replication checkpoint	1	1	0.0175029	0.371068	A0A8I6WDS1
GO:0034198	cellular response to amino acid starvation	1	1	0.0175029	0.371068	A0A8I7BBK6
GO:0042770	signal transduction in response to DNA damage	1	1	0.0175029	0.371068	F2DC93
GO:0051016	barbed-end actin filament capping	1	1	0.0175029	0.371068	A0A287MLU2
GO:0072331	signal transduction by p53 class mediator	1	1	0.0175029	0.371068	F2DC93
GO:0010628	positive regulation of gene expression	2	15	0.0272208	0.371068	A0A8I6XEF6;A0A8I6XVG7
GO:0044702	single organism reproductive process	3	39	0.0295228	0.371068	A0A8I6WXG8;A0A8I6XBD2;Q673G6
GO:0065007	biological regulation	12	390	0.0313598	0.371068	A0A287MLU2;A0A287TTV1;A0A8I6WDS1;A0A8I6XEF6;A0A8I6XQR9;A0A8I6XVG7;A0A8I6YGF9;A0A8I7B2U1;A0A8I7BBK6;A0A8I7BEZ0;F2DC93;Q673G6
GO:0000077	DNA damage checkpoint	1	2	0.0347062	0.371068	A0A8I6WDS1
GO:0000350	generation of catalytic spliceosome for second transesterification step	1	2	0.0347062	0.371068	F2D0F3
GO:0001525	angiogenesis	1	2	0.0347062	0.371068	A0A8I6XVG7
GO:0001568	blood vessel development	1	2	0.0347062	0.371068	A0A8I6XVG7
GO:0001944	vasculature development	1	2	0.0347062	0.371068	A0A8I6XVG7
GO:0007023	post-chaperonin tubulin folding pathway	1	2	0.0347062	0.371068	A0A8I6XN50
GO:0009865	pollen tube adhesion	1	2	0.0347062	0.371068	A0A8I6XBD2
GO:0010972	negative regulation of G2/M transition of mitotic cell cycle	1	2	0.0347062	0.371068	A0A8I6WDS1
GO:0031570	DNA integrity checkpoint	1	2	0.0347062	0.371068	A0A8I6WDS1
GO:0044773	mitotic DNA damage checkpoint	1	2	0.0347062	0.371068	A0A8I6WDS1
GO:0044774	mitotic DNA integrity checkpoint	1	2	0.0347062	0.371068	A0A8I6WDS1
GO:0044818	mitotic G2/M transition checkpoint	1	2	0.0347062	0.371068	A0A8I6WDS1
GO:0048514	blood vessel morphogenesis	1	2	0.0347062	0.371068	A0A8I6XVG7
GO:0072358	cardiovascular system development	1	2	0.0347062	0.371068	A0A8I6XVG7
GO:0072359	circulatory system development	1	2	0.0347062	0.371068	A0A8I6XVG7
GO:0098740	multi organism cell adhesion	1	2	0.0347062	0.371068	A0A8I6XBD2
GO:1902750	negative regulation of cell cycle G2/M phase transition	1	2	0.0347062	0.371068	A0A8I6WDS1
GO:1903189	glyoxal metabolic process	1	2	0.0347062	0.371068	F2CUF4
GO:0007154	cell communication	5	113	0.0451423	0.371068	A0A287TTV1;A0A8I6XBD2;A0A8I7BBK6;A0A8I7BEZ0;F2DC93
GO:0050789	regulation of biological process	10	320	0.0454817	0.371068	A0A287MLU2;A0A287TTV1;A0A8I6WDS1;A0A8I6XEF6;A0A8I6XVG7;A0A8I6YGF9;A0A8I7BBK6;A0A8I7BEZ0;F2DC93;Q673G6
GO:0043624	cellular protein complex disassembly	2	21	0.0509585	0.371068	A0A287MLU2;A0A8I6XEF6
GO:0000075	cell cycle checkpoint	1	3	0.0516148	0.371068	A0A8I6WDS1
GO:0000086	G2/M transition of mitotic cell cycle	1	3	0.0516148	0.371068	A0A8I6WDS1
GO:0000393	spliceosomal conformational changes to generate catalytic conformation	1	3	0.0516148	0.371068	F2D0F3
GO:0006020	inositol metabolic process	1	3	0.0516148	0.371068	A0A287TTV1
GO:0006021	inositol biosynthetic process	1	3	0.0516148	0.371068	A0A287TTV1
GO:0006449	regulation of translational termination	1	3	0.0516148	0.371068	A0A8I6XEF6
GO:0006529	asparagine biosynthetic process	1	3	0.0516148	0.371068	A0A287K5X8
GO:0007021	tubulin complex assembly	1	3	0.0516148	0.371068	A0A8I6XN50
GO:0007093	mitotic cell cycle checkpoint	1	3	0.0516148	0.371068	A0A8I6WDS1
GO:0007155	cell adhesion	1	3	0.0516148	0.371068	A0A8I6XBD2
GO:0008615	pyridoxine biosynthetic process	1	3	0.0516148	0.371068	F2DUQ7
GO:0009627	systemic acquired resistance	1	3	0.0516148	0.371068	A0A8I6XTL4
GO:0009814	defense response, incompatible interaction	1	3	0.0516148	0.371068	A0A8I6XTL4
GO:0010389	regulation of G2/M transition of mitotic cell cycle	1	3	0.0516148	0.371068	A0A8I6WDS1
GO:0010506	regulation of autophagy	1	3	0.0516148	0.371068	F2DC93
GO:0010948	negative regulation of cell cycle process	1	3	0.0516148	0.371068	A0A8I6WDS1
GO:0016560	protein import into peroxisome matrix, docking	1	3	0.0516148	0.371068	A0A8I6YEH6
GO:0022610	biological adhesion	1	3	0.0516148	0.371068	A0A8I6XBD2
GO:0022615	protein to membrane docking	1	3	0.0516148	0.371068	A0A8I6YEH6
GO:0030834	regulation of actin filament depolymerization	1	3	0.0516148	0.371068	A0A287MLU2
GO:0030835	negative regulation of actin filament depolymerization	1	3	0.0516148	0.371068	A0A287MLU2
GO:0034250	positive regulation of cellular amide metabolic process	1	3	0.0516148	0.371068	A0A8I6XEF6
GO:0042819	vitamin B6 biosynthetic process	1	3	0.0516148	0.371068	F2DUQ7
GO:0043242	negative regulation of protein complex disassembly	1	3	0.0516148	0.371068	A0A287MLU2
GO:0043243	positive regulation of protein complex disassembly	1	3	0.0516148	0.371068	A0A8I6XEF6
GO:0044839	cell cycle G2/M phase transition	1	3	0.0516148	0.371068	A0A8I6WDS1
GO:0045727	positive regulation of translation	1	3	0.0516148	0.371068	A0A8I6XEF6
GO:0045786	negative regulation of cell cycle	1	3	0.0516148	0.371068	A0A8I6WDS1
GO:0045901	positive regulation of translational elongation	1	3	0.0516148	0.371068	A0A8I6XEF6
GO:0045905	positive regulation of translational termination	1	3	0.0516148	0.371068	A0A8I6XEF6
GO:0045930	negative regulation of mitotic cell cycle	1	3	0.0516148	0.371068	A0A8I6WDS1
GO:0048646	anatomical structure formation involved in morphogenesis	1	3	0.0516148	0.371068	A0A8I6XVG7
GO:0051014	actin filament severing	1	3	0.0516148	0.371068	A0A287MLU2
GO:0051693	actin filament capping	1	3	0.0516148	0.371068	A0A287MLU2
GO:0098609	cell-cell adhesion	1	3	0.0516148	0.371068	A0A8I6XBD2
GO:1901879	regulation of protein depolymerization	1	3	0.0516148	0.371068	A0A287MLU2
GO:1901880	negative regulation of protein depolymerization	1	3	0.0516148	0.371068	A0A287MLU2
GO:1901988	negative regulation of cell cycle phase transition	1	3	0.0516148	0.371068	A0A8I6WDS1
GO:1901991	negative regulation of mitotic cell cycle phase transition	1	3	0.0516148	0.371068	A0A8I6WDS1
GO:1902749	regulation of cell cycle G2/M phase transition	1	3	0.0516148	0.371068	A0A8I6WDS1
GO:0003006	developmental process involved in reproduction	3	50	0.0554602	0.382362	A0A8I6WXG8;A0A8I6XBD2;Q673G6
GO:0010604	positive regulation of macromolecule metabolic process	2	24	0.0648081	0.382362	A0A8I6XEF6;A0A8I6XVG7
GO:0006528	asparagine metabolic process	1	4	0.0682337	0.382362	A0A287K5X8
GO:0008614	pyridoxine metabolic process	1	4	0.0682337	0.382362	F2DUQ7
GO:0009875	pollen-pistil interaction	1	4	0.0682337	0.382362	A0A8I6XBD2
GO:0030837	negative regulation of actin filament polymerization	1	4	0.0682337	0.382362	A0A287MLU2
GO:0031333	negative regulation of protein complex assembly	1	4	0.0682337	0.382362	A0A287MLU2
GO:0032272	negative regulation of protein polymerization	1	4	0.0682337	0.382362	A0A287MLU2
GO:0042816	vitamin B6 metabolic process	1	4	0.0682337	0.382362	F2DUQ7
GO:0042822	pyridoxal phosphate metabolic process	1	4	0.0682337	0.382362	F2DUQ7
GO:0042823	pyridoxal phosphate biosynthetic process	1	4	0.0682337	0.382362	F2DUQ7
GO:0045087	innate immune response	1	4	0.0682337	0.382362	A0A8I6XTL4
GO:0051494	negative regulation of cytoskeleton organization	1	4	0.0682337	0.382362	A0A287MLU2
GO:1901987	regulation of cell cycle phase transition	1	4	0.0682337	0.382362	A0A8I6WDS1
GO:1901990	regulation of mitotic cell cycle phase transition	1	4	0.0682337	0.382362	A0A8I6WDS1
GO:0009893	positive regulation of metabolic process	2	25	0.0696778	0.382362	A0A8I6XEF6;A0A8I6XVG7
GO:0043241	protein complex disassembly	2	25	0.0696778	0.382362	A0A287MLU2;A0A8I6XEF6
GO:0051028	mRNA transport	2	25	0.0696778	0.382362	A0A287Q7U2;A0A8I6Y060
GO:0043623	cellular protein complex assembly	3	57	0.0761407	0.382362	A0A287MLU2;A0A8I6XN50;F2CX02
GO:0022411	cellular component disassembly	2	27	0.0797635	0.382362	A0A287MLU2;A0A8I6XEF6
GO:0032984	macromolecular complex disassembly	2	27	0.0797635	0.382362	A0A287MLU2;A0A8I6XEF6
GO:0051128	regulation of cellular component organization	2	27	0.0797635	0.382362	A0A287MLU2;A0A8I6XEF6
GO:0032501	multicellular organismal process	4	94	0.0797948	0.382362	A0A8I6WXG8;A0A8I6XBD2;A0A8I6XVG7;Q673G6
GO:0022414	reproductive process	3	59	0.0826009	0.382362	A0A8I6WXG8;A0A8I6XBD2;Q673G6
GO:0006515	misfolded or incompletely synthesized protein catabolic process	1	5	0.0845677	0.382362	F2D539
GO:0006955	immune response	1	5	0.0845677	0.382362	A0A8I6XTL4
GO:0008064	regulation of actin polymerization or depolymerization	1	5	0.0845677	0.382362	A0A287MLU2
GO:0009423	chorismate biosynthetic process	1	5	0.0845677	0.382362	B5AAU3
GO:0009686	gibberellin biosynthetic process	1	5	0.0845677	0.382362	Q673G6
GO:0009826	unidimensional cell growth	1	5	0.0845677	0.382362	Q673G6
GO:0016102	diterpenoid biosynthetic process	1	5	0.0845677	0.382362	Q673G6
GO:0016558	protein import into peroxisome matrix	1	5	0.0845677	0.382362	A0A8I6YEH6
GO:0030041	actin filament polymerization	1	5	0.0845677	0.382362	A0A287MLU2
GO:0030832	regulation of actin filament length	1	5	0.0845677	0.382362	A0A287MLU2
GO:0030833	regulation of actin filament polymerization	1	5	0.0845677	0.382362	A0A287MLU2
GO:0032271	regulation of protein polymerization	1	5	0.0845677	0.382362	A0A287MLU2
GO:0032956	regulation of actin cytoskeleton organization	1	5	0.0845677	0.382362	A0A287MLU2
GO:0033260	nuclear DNA replication	1	5	0.0845677	0.382362	A0A8I6WDS1
GO:0040008	regulation of growth	1	5	0.0845677	0.382362	Q673G6
GO:0043248	proteasome assembly	1	5	0.0845677	0.382362	F2CX02
GO:0044786	cell cycle DNA replication	1	5	0.0845677	0.382362	A0A8I6WDS1
GO:0046834	lipid phosphorylation	1	5	0.0845677	0.382362	A0A287TTV1
GO:0046854	phosphatidylinositol phosphorylation	1	5	0.0845677	0.382362	A0A287TTV1
GO:0000003	reproduction	3	60	0.0859184	0.382362	A0A8I6WXG8;A0A8I6XBD2;Q673G6
GO:0048856	anatomical structure development	4	98	0.0899198	0.382362	A0A8I6WXG8;A0A8I6XBD2;A0A8I6XVG7;Q673G6
GO:0050657	nucleic acid transport	2	29	0.0902758	0.382362	A0A287Q7U2;A0A8I6Y060
GO:0050658	RNA transport	2	29	0.0902758	0.382362	A0A287Q7U2;A0A8I6Y060
GO:0051236	establishment of RNA localization	2	29	0.0902758	0.382362	A0A287Q7U2;A0A8I6Y060
GO:0006403	RNA localization	2	30	0.0956792	0.382362	A0A287Q7U2;A0A8I6Y060
GO:0009653	anatomical structure morphogenesis	2	30	0.0956792	0.382362	A0A8I6XVG7;Q673G6
GO:0009685	gibberellin metabolic process	1	6	0.100622	0.382362	Q673G6
GO:0009908	flower development	1	6	0.100622	0.382362	Q673G6
GO:0010639	negative regulation of organelle organization	1	6	0.100622	0.382362	A0A287MLU2
GO:0032535	regulation of cellular component size	1	6	0.100622	0.382362	A0A287MLU2
GO:0032970	regulation of actin filament-based process	1	6	0.100622	0.382362	A0A287MLU2
GO:0044770	cell cycle phase transition	1	6	0.100622	0.382362	A0A8I6WDS1
GO:0044772	mitotic cell cycle phase transition	1	6	0.100622	0.382362	A0A8I6WDS1
GO:0046173	polyol biosynthetic process	1	6	0.100622	0.382362	A0A287TTV1
GO:0046184	aldehyde biosynthetic process	1	6	0.100622	0.382362	F2DUQ7
GO:0046292	formaldehyde metabolic process	1	6	0.100622	0.382362	A0A8I6WWD2
GO:0046294	formaldehyde catabolic process	1	6	0.100622	0.382362	A0A8I6WWD2
GO:0048868	pollen tube development	1	6	0.100622	0.382362	A0A8I6XBD2
GO:0051129	negative regulation of cellular component organization	1	6	0.100622	0.382362	A0A287MLU2
GO:0051258	protein polymerization	1	6	0.100622	0.382362	A0A287MLU2
GO:0072525	pyridine-containing compound biosynthetic process	1	6	0.100622	0.382362	F2DUQ7
GO:0090066	regulation of anatomical structure size	1	6	0.100622	0.382362	A0A287MLU2
GO:0006508	proteolysis	7	230	0.101577	0.383254	A0A8I6Y3B8;A0A8I7B2U1;F2CRI6;F2D539;F2D663;F2DC93;F2DNP6
GO:0050794	regulation of cellular process	8	277	0.103897	0.389249	A0A287MLU2;A0A287TTV1;A0A8I6WDS1;A0A8I6XEF6;A0A8I6YGF9;A0A8I7BBK6;A0A8I7BEZ0;F2DC93
GO:0015931	nucleobase-containing compound transport	2	32	0.106757	0.394406	A0A287Q7U2;A0A8I6Y060
GO:1901617	organic hydroxy compound biosynthetic process	2	32	0.106757	0.394406	A0A287TTV1;F2DUQ7
GO:0006448	regulation of translational elongation	1	7	0.1164	0.396955	A0A8I6XEF6
GO:0006885	regulation of pH	1	7	0.1164	0.396955	A0A8I6XQR9
GO:0010564	regulation of cell cycle process	1	7	0.1164	0.396955	A0A8I6WDS1
GO:0016101	diterpenoid metabolic process	1	7	0.1164	0.396955	Q673G6
GO:0030004	cellular monovalent inorganic cation homeostasis	1	7	0.1164	0.396955	A0A8I6XQR9
GO:0030641	regulation of cellular pH	1	7	0.1164	0.396955	A0A8I6XQR9
GO:0046417	chorismate metabolic process	1	7	0.1164	0.396955	B5AAU3
GO:0051130	positive regulation of cellular component organization	1	7	0.1164	0.396955	A0A8I6XEF6
GO:0051453	regulation of intracellular pH	1	7	0.1164	0.396955	A0A8I6XQR9
GO:0051493	regulation of cytoskeleton organization	1	7	0.1164	0.396955	A0A287MLU2
GO:0055067	monovalent inorganic cation homeostasis	1	7	0.1164	0.396955	A0A8I6XQR9
GO:0090567	reproductive shoot system development	1	7	0.1164	0.396955	Q673G6
GO:0071705	nitrogen compound transport	2	35	0.123981	0.412795	A0A287Q7U2;A0A8I6Y060
GO:0006376	mRNA splice site selection	1	8	0.131908	0.412795	F2D0F3
GO:0006625	protein targeting to peroxisome	1	8	0.131908	0.412795	A0A8I6YEH6
GO:0009267	cellular response to starvation	1	8	0.131908	0.412795	A0A8I7BBK6
GO:0009856	pollination	1	8	0.131908	0.412795	A0A8I6XBD2
GO:0031329	regulation of cellular catabolic process	1	8	0.131908	0.412795	F2DC93
GO:0035999	tetrahydrofolate interconversion	1	8	0.131908	0.412795	A0A8I6XQX4
GO:0042594	response to starvation	1	8	0.131908	0.412795	A0A8I7BBK6
GO:0043574	peroxisomal transport	1	8	0.131908	0.412795	A0A8I6YEH6
GO:0044706	multi-multicellular organism process	1	8	0.131908	0.412795	A0A8I6XBD2
GO:0046488	phosphatidylinositol metabolic process	1	8	0.131908	0.412795	A0A287TTV1
GO:0060560	developmental growth involved in morphogenesis	1	8	0.131908	0.412795	Q673G6
GO:0072662	protein localization to peroxisome	1	8	0.131908	0.412795	A0A8I6YEH6
GO:0072663	establishment of protein localization to peroxisome	1	8	0.131908	0.412795	A0A8I6YEH6
GO:0032502	developmental process	4	114	0.136181	0.423673	A0A8I6WXG8;A0A8I6XBD2;A0A8I6XVG7;Q673G6
GO:0048731	system development	3	74	0.137882	0.426473	A0A8I6WXG8;A0A8I6XVG7;Q673G6
GO:0006415	translational termination	1	9	0.14715	0.439795	A0A8I6XEF6
GO:0007346	regulation of mitotic cell cycle	1	9	0.14715	0.439795	A0A8I6WDS1
GO:0030042	actin filament depolymerization	1	9	0.14715	0.439795	A0A287MLU2
GO:0031669	cellular response to nutrient levels	1	9	0.14715	0.439795	A0A8I7BBK6
GO:0032270	positive regulation of cellular protein metabolic process	1	9	0.14715	0.439795	A0A8I6XEF6
GO:0046653	tetrahydrofolate metabolic process	1	9	0.14715	0.439795	A0A8I6XQX4
GO:0006732	coenzyme metabolic process	4	119	0.152352	0.4528	A0A8I6XQX4;A0A8I6ZA35;A0A8I7BJ09;F2DUQ7
GO:0006417	regulation of translation	2	41	0.160202	0.458792	A0A8I6XEF6;A0A8I7BBK6
GO:0034248	regulation of cellular amide metabolic process	2	41	0.160202	0.458792	A0A8I6XEF6;A0A8I7BBK6
GO:0005983	starch catabolic process	1	10	0.162129	0.458792	A0A8I6XP65
GO:0031667	response to nutrient levels	1	10	0.162129	0.458792	A0A8I7BBK6
GO:0031668	cellular response to extracellular stimulus	1	10	0.162129	0.458792	A0A8I7BBK6
GO:0051247	positive regulation of protein metabolic process	1	10	0.162129	0.458792	A0A8I6XEF6
GO:0051261	protein depolymerization	1	10	0.162129	0.458792	A0A287MLU2
GO:0051726	regulation of cell cycle	1	10	0.162129	0.458792	A0A8I6WDS1
GO:0071496	cellular response to external stimulus	1	10	0.162129	0.458792	A0A8I7BBK6
GO:0019222	regulation of metabolic process	5	170	0.173004	0.465768	A0A8I6XEF6;A0A8I6XVG7;A0A8I6YGF9;A0A8I7BBK6;F2DC93
GO:0000245	spliceosomal complex assembly	1	11	0.176852	0.465768	F2D0F3
GO:0000902	cell morphogenesis	1	11	0.176852	0.465768	Q673G6
GO:0002376	immune system process	1	11	0.176852	0.465768	A0A8I6XTL4
GO:0006086	acetyl-CoA biosynthetic process from pyruvate	1	11	0.176852	0.465768	A0A8I7BJ09
GO:0006760	folic acid-containing compound metabolic process	1	11	0.176852	0.465768	A0A8I6XQX4
GO:0008154	actin polymerization or depolymerization	1	11	0.176852	0.465768	A0A287MLU2
GO:0009991	response to extracellular stimulus	1	11	0.176852	0.465768	A0A8I7BBK6
GO:0010557	positive regulation of macromolecule biosynthetic process	1	11	0.176852	0.465768	A0A8I6XEF6
GO:0016049	cell growth	1	11	0.176852	0.465768	Q673G6
GO:0031328	positive regulation of cellular biosynthetic process	1	11	0.176852	0.465768	A0A8I6XEF6
GO:0032989	cellular component morphogenesis	1	11	0.176852	0.465768	Q673G6
GO:0042558	pteridine-containing compound metabolic process	1	11	0.176852	0.465768	A0A8I6XQX4
GO:0048589	developmental growth	1	11	0.176852	0.465768	Q673G6
GO:0009108	coenzyme biosynthetic process	2	44	0.178994	0.469087	A0A8I7BJ09;F2DUQ7
GO:0007275	multicellular organism development	3	84	0.180232	0.470017	A0A8I6WXG8;A0A8I6XVG7;Q673G6
GO:0048608	reproductive structure development	2	45	0.185336	0.474375	A0A8I6WXG8;Q673G6
GO:0061458	reproductive system development	2	45	0.185336	0.474375	A0A8I6WXG8;Q673G6
GO:0010468	regulation of gene expression	4	130	0.190363	0.474375	A0A8I6XEF6;A0A8I6XVG7;A0A8I6YGF9;A0A8I7BBK6
GO:0071822	protein complex subunit organization	4	130	0.190363	0.474375	A0A287MLU2;A0A8I6XEF6;A0A8I6XN50;F2CX02
GO:0009891	positive regulation of biosynthetic process	1	12	0.191321	0.474375	A0A8I6XEF6
GO:0031647	regulation of protein stability	1	12	0.191321	0.474375	A0A8I7B2U1
GO:0032543	mitochondrial translation	1	12	0.191321	0.474375	F2EIG1
GO:0043254	regulation of protein complex assembly	1	12	0.191321	0.474375	A0A287MLU2
GO:0044703	multi-organism reproductive process	1	12	0.191321	0.474375	A0A8I6XBD2
GO:0046185	aldehyde catabolic process	1	12	0.191321	0.474375	A0A8I6WWD2
GO:0048518	positive regulation of biological process	2	46	0.191712	0.474375	A0A8I6XEF6;A0A8I6XVG7
GO:0044707	single-multicellular organism process	3	88	0.198106	0.487928	A0A8I6WXG8;A0A8I6XVG7;Q673G6
GO:0009894	regulation of catabolic process	1	13	0.205542	0.494789	F2DC93
GO:0016114	terpenoid biosynthetic process	1	13	0.205542	0.494789	Q673G6
GO:0033043	regulation of organelle organization	1	13	0.205542	0.494789	A0A287MLU2
GO:0043650	dicarboxylic acid biosynthetic process	1	13	0.205542	0.494789	B5AAU3
GO:0044247	cellular polysaccharide catabolic process	1	13	0.205542	0.494789	A0A8I6XP65
GO:0044283	small molecule biosynthetic process	5	181	0.206725	0.495394	A0A287K5X8;A0A287TTV1;B5AAU3;F2DUQ7;Q673G6
GO:0010608	posttranscriptional regulation of gene expression	2	49	0.211012	0.5034	A0A8I6XEF6;A0A8I7BBK6
GO:0051186	cofactor metabolic process	4	137	0.216046	0.509072	A0A8I6XQX4;A0A8I6ZA35;A0A8I7BJ09;F2DUQ7
GO:0051704	multi-organism process	2	50	0.217493	0.509072	A0A8I6XBD2;A0A8I6XTL4
GO:0009738	abscisic acid-activated signaling pathway	1	14	0.219518	0.509072	A0A8I7BEZ0
GO:0044087	regulation of cellular component biogenesis	1	14	0.219518	0.509072	A0A287MLU2
GO:0048367	shoot system development	1	14	0.219518	0.509072	Q673G6
GO:0071215	cellular response to abscisic acid stimulus	1	14	0.219518	0.509072	A0A8I7BEZ0
GO:0010556	regulation of macromolecule biosynthetic process	3	93	0.221045	0.509072	A0A8I6XEF6;A0A8I6YGF9;A0A8I7BBK6
GO:2000112	regulation of cellular macromolecule biosynthetic process	3	93	0.221045	0.509072	A0A8I6XEF6;A0A8I6YGF9;A0A8I7BBK6
GO:0032268	regulation of cellular protein metabolic process	2	51	0.223994	0.510662	A0A8I6XEF6;A0A8I7BBK6
GO:0031323	regulation of cellular metabolic process	4	140	0.227352	0.510662	A0A8I6XEF6;A0A8I6YGF9;A0A8I7BBK6;F2DC93
GO:0034622	cellular macromolecular complex assembly	4	140	0.227352	0.510662	A0A287MLU2;A0A8I6XN50;F2CX02;F2D0F3
GO:0009605	response to external stimulus	2	52	0.230511	0.510662	A0A8I6XTL4;A0A8I7BBK6
GO:0006085	acetyl-CoA biosynthetic process	1	15	0.233253	0.510662	A0A8I7BJ09
GO:0006261	DNA-dependent DNA replication	1	15	0.233253	0.510662	A0A8I6WDS1
GO:0006730	one-carbon metabolic process	1	15	0.233253	0.510662	A0A8I6XQX4
GO:0007015	actin filament organization	1	15	0.233253	0.510662	A0A287MLU2
GO:0009073	aromatic amino acid family biosynthetic process	1	15	0.233253	0.510662	B5AAU3
GO:0032511	late endosome to vacuole transport via multivesicular body sorting pathway	1	15	0.233253	0.510662	F2DA66
GO:0040007	growth	1	15	0.233253	0.510662	Q673G6
GO:0051173	positive regulation of nitrogen compound metabolic process	1	15	0.233253	0.510662	A0A8I6XEF6
GO:0009791	post-embryonic development	2	53	0.237043	0.516832	A0A8I6WXG8;Q673G6
GO:0007165	signal transduction	3	97	0.23979	0.518571	A0A287TTV1;A0A8I7BEZ0;F2DC93
GO:0031326	regulation of cellular biosynthetic process	3	97	0.23979	0.518571	A0A8I6XEF6;A0A8I6YGF9;A0A8I7BBK6
GO:0044711	single-organism biosynthetic process	8	342	0.2421	0.518863	A0A287K5X8;A0A287TTV1;A0A8I6WDS1;A0A8I7BJ09;B5AAU3;F2DUQ7;F2EIG1;Q673G6
GO:0006414	translational elongation	1	16	0.246752	0.518863	A0A8I6XEF6
GO:0006650	glycerophospholipid metabolic process	1	16	0.246752	0.518863	A0A287TTV1
GO:0009251	glucan catabolic process	1	16	0.246752	0.518863	A0A8I6XP65
GO:0030036	actin cytoskeleton organization	1	16	0.246752	0.518863	A0A287MLU2
GO:0042364	water-soluble vitamin biosynthetic process	1	16	0.246752	0.518863	F2DUQ7
GO:0097306	cellular response to alcohol	1	16	0.246752	0.518863	A0A8I7BEZ0
GO:0009889	regulation of biosynthetic process	3	99	0.249272	0.52005	A0A8I6XEF6;A0A8I6YGF9;A0A8I7BBK6
GO:0044700	single organism signaling	3	99	0.249272	0.52005	A0A287TTV1;A0A8I7BEZ0;F2DC93
GO:0023052	signaling	3	100	0.254037	0.523978	A0A287TTV1;A0A8I7BEZ0;F2DC93
GO:0006461	protein complex assembly	3	101	0.258817	0.523978	A0A287MLU2;A0A8I6XN50;F2CX02
GO:0070271	protein complex biogenesis	3	101	0.258817	0.523978	A0A287MLU2;A0A8I6XN50;F2CX02
GO:0006098	pentose-phosphate shunt	1	17	0.260019	0.523978	A0A8I6ZA35
GO:0006721	terpenoid metabolic process	1	17	0.260019	0.523978	Q673G6
GO:0030029	actin filament-based process	1	17	0.260019	0.523978	A0A287MLU2
GO:0035384	thioester biosynthetic process	1	17	0.260019	0.523978	A0A8I7BJ09
GO:0071396	cellular response to lipid	1	17	0.260019	0.523978	A0A8I7BEZ0
GO:0071616	acyl-CoA biosynthetic process	1	17	0.260019	0.523978	A0A8I7BJ09
GO:0006974	cellular response to DNA damage stimulus	2	57	0.263267	0.525245	A0A8I6WDS1;F2DC93
GO:0051188	cofactor biosynthetic process	2	57	0.263267	0.525245	A0A8I7BJ09;F2DUQ7
GO:0044767	single-organism developmental process	3	102	0.26361	0.525245	A0A8I6WXG8;A0A8I6XVG7;Q673G6
GO:0019538	protein metabolic process	11	509	0.266444	0.526327	A0A8I6XEF6;A0A8I6Y3B8;A0A8I7B2U1;A0A8I7BBK6;F2CRI6;F2D539;F2D663;F2DC93;F2DNP6;F2E2F1;F2EIG1
GO:0051246	regulation of protein metabolic process	2	58	0.269836	0.526327	A0A8I6XEF6;A0A8I7BBK6
GO:0006914	autophagy	1	18	0.273057	0.526327	F2DC93
GO:0007031	peroxisome organization	1	18	0.273057	0.526327	A0A8I6YEH6
GO:0009110	vitamin biosynthetic process	1	18	0.273057	0.526327	F2DUQ7
GO:0009793	embryo development ending in seed dormancy	1	18	0.273057	0.526327	A0A8I6WXG8
GO:0019751	polyol metabolic process	1	18	0.273057	0.526327	A0A287TTV1
GO:0022406	membrane docking	1	18	0.273057	0.526327	A0A8I6YEH6
GO:0032509	endosome transport via multivesicular body sorting pathway	1	18	0.273057	0.526327	F2DA66
GO:0005982	starch metabolic process	1	19	0.28587	0.539302	A0A8I6XP65
GO:0006541	glutamine metabolic process	1	19	0.28587	0.539302	A0A287K5X8
GO:0008299	isoprenoid biosynthetic process	1	19	0.28587	0.539302	Q673G6
GO:0009790	embryo development	1	19	0.28587	0.539302	A0A8I6WXG8
GO:0045324	late endosome to vacuole transport	1	19	0.28587	0.539302	F2DA66
GO:0046486	glycerolipid metabolic process	1	19	0.28587	0.539302	A0A287TTV1
GO:0072594	establishment of protein localization to organelle	3	107	0.287747	0.540924	A0A8I6Y060;A0A8I6YEH6;F2DVC1
GO:0048523	negative regulation of cellular process	2	61	0.28954	0.541468	A0A287MLU2;A0A8I6WDS1
GO:0016043	cellular component organization	10	466	0.290072	0.541468	A0A287MLU2;A0A287Q7U2;A0A8I6XEF6;A0A8I6XN50;A0A8I6YEH6;F2CX02;F2D0F3;F2DA66;F2EIG1;Q673G6
GO:0017038	protein import	2	62	0.2961	0.543775	A0A8I6Y060;A0A8I6YEH6
GO:0065008	regulation of biological quality	3	109	0.297465	0.543775	A0A287MLU2;A0A8I6XQR9;A0A8I7B2U1
GO:0006739	NADP metabolic process	1	20	0.298463	0.543775	A0A8I6ZA35
GO:0009314	response to radiation	1	20	0.298463	0.543775	Q673G6
GO:0009416	response to light stimulus	1	20	0.298463	0.543775	Q673G6
GO:0019682	glyceraldehyde-3-phosphate metabolic process	1	20	0.298463	0.543775	A0A8I6ZA35
GO:0051156	glucose 6-phosphate metabolic process	1	20	0.298463	0.543775	A0A8I6ZA35
GO:0060255	regulation of macromolecule metabolic process	4	159	0.302058	0.54766	A0A8I6XEF6;A0A8I6XVG7;A0A8I6YGF9;A0A8I7BBK6
GO:0001101	response to acid chemical	2	63	0.302654	0.54766	A0A8I6YH11;A0A8I7BEZ0
GO:0043933	macromolecular complex subunit organization	5	210	0.304505	0.549141	A0A287MLU2;A0A8I6XEF6;A0A8I6XN50;F2CX02;F2D0F3
GO:0006605	protein targeting	3	111	0.307209	0.551219	A0A8I6Y060;A0A8I6YEH6;F2DVC1
GO:0072524	pyridine-containing compound metabolic process	2	64	0.3092	0.551219	A0A8I6ZA35;F2DUQ7
GO:0006084	acetyl-CoA metabolic process	1	21	0.310838	0.551219	A0A8I7BJ09
GO:0006260	DNA replication	1	21	0.310838	0.551219	A0A8I6WDS1
GO:0031325	positive regulation of cellular metabolic process	1	21	0.310838	0.551219	A0A8I6XEF6
GO:1901615	organic hydroxy compound metabolic process	2	65	0.315735	0.558043	A0A287TTV1;F2DUQ7
GO:0006767	water-soluble vitamin metabolic process	1	22	0.323	0.559726	F2DUQ7
GO:0006873	cellular ion homeostasis	1	22	0.323	0.559726	A0A8I6XQR9
GO:0030003	cellular cation homeostasis	1	22	0.323	0.559726	A0A8I6XQR9
GO:0055080	cation homeostasis	1	22	0.323	0.559726	A0A8I6XQR9
GO:0071229	cellular response to acid chemical	1	22	0.323	0.559726	A0A8I7BEZ0
GO:0098771	inorganic ion homeostasis	1	22	0.323	0.559726	A0A8I6XQR9
GO:0043603	cellular amide metabolic process	6	269	0.329284	0.565696	A0A287K5X8;A0A8I6XEF6;A0A8I6XQX4;A0A8I7BBK6;F2E2F1;F2EIG1
GO:0006720	isoprenoid metabolic process	1	23	0.334951	0.565696	Q673G6
GO:0010154	fruit development	1	23	0.334951	0.565696	A0A8I6WXG8
GO:0044275	cellular carbohydrate catabolic process	1	23	0.334951	0.565696	A0A8I6XP65
GO:0045047	protein targeting to ER	1	23	0.334951	0.565696	F2DVC1
GO:0048316	seed development	1	23	0.334951	0.565696	A0A8I6WXG8
GO:0050801	ion homeostasis	1	23	0.334951	0.565696	A0A8I6XQR9
GO:0072599	establishment of protein localization to endoplasmic reticulum	1	23	0.334951	0.565696	F2DVC1
GO:0043604	amide biosynthetic process	5	219	0.336531	0.566565	A0A287K5X8;A0A8I6XEF6;A0A8I7BBK6;F2E2F1;F2EIG1
GO:0051171	regulation of nitrogen compound metabolic process	3	118	0.341417	0.572978	A0A8I6XEF6;A0A8I6YGF9;A0A8I7BBK6
GO:0006766	vitamin metabolic process	1	24	0.346697	0.57819	F2DUQ7
GO:0006900	membrane budding	1	24	0.346697	0.57819	F2DA66
GO:0048519	negative regulation of biological process	2	70	0.348204	0.578888	A0A287MLU2;A0A8I6WDS1
GO:0065003	macromolecular complex assembly	4	172	0.354993	0.588338	A0A287MLU2;A0A8I6XN50;F2CX02;F2D0F3
GO:0046165	alcohol biosynthetic process	1	25	0.358239	0.591874	A0A287TTV1
GO:0033365	protein localization to organelle	3	122	0.360963	0.594528	A0A8I6Y060;A0A8I6YEH6;F2DVC1
GO:0044262	cellular carbohydrate metabolic process	2	73	0.367468	0.599444	A0A287TTV1;A0A8I6XP65
GO:0006637	acyl-CoA metabolic process	1	26	0.369582	0.599444	A0A8I7BJ09
GO:0006644	phospholipid metabolic process	1	26	0.369582	0.599444	A0A287TTV1
GO:0009072	aromatic amino acid family metabolic process	1	26	0.369582	0.599444	B5AAU3
GO:0035383	thioester metabolic process	1	26	0.369582	0.599444	A0A8I7BJ09
GO:0043170	macromolecule metabolic process	17	889	0.377857	0.610084	A0A8I6WDS1;A0A8I6XEF6;A0A8I6XP65;A0A8I6XVG7;A0A8I6Y3B8;A0A8I6YGF9;A0A8I7B2U1;A0A8I7BBK6;F2CRI6;F2D0F3;F2D539;F2D663;F2DC93;F2DIB4;F2DNP6;F2E2F1;F2EIG1
GO:0009628	response to abiotic stimulus	3	126	0.380449	0.610084	A0A8I6YH11;A0A8I7BBZ4;Q673G6
GO:1902589	single-organism organelle organization	3	126	0.380449	0.610084	A0A287MLU2;A0A8I6YEH6;F2EIG1
GO:1901701	cellular response to oxygen-containing compound	1	27	0.380729	0.610084	A0A8I7BEZ0
GO:0009067	aspartate family amino acid biosynthetic process	1	28	0.391683	0.622016	A0A287K5X8
GO:0009755	hormone-mediated signaling pathway	1	28	0.391683	0.622016	A0A8I7BEZ0
GO:0055082	cellular chemical homeostasis	1	28	0.391683	0.622016	A0A8I6XQR9
GO:0051716	cellular response to stimulus	5	236	0.397854	0.627866	A0A287TTV1;A0A8I6WDS1;A0A8I7BBK6;A0A8I7BEZ0;F2DC93
GO:0006606	protein import into nucleus	1	29	0.402448	0.627866	A0A8I6Y060
GO:0034504	protein localization to nucleus	1	29	0.402448	0.627866	A0A8I6Y060
GO:0044744	protein targeting to nucleus	1	29	0.402448	0.627866	A0A8I6Y060
GO:0051170	nuclear import	1	29	0.402448	0.627866	A0A8I6Y060
GO:1902593	single-organism nuclear import	1	29	0.402448	0.627866	A0A8I6Y060
GO:0009414	response to water deprivation	1	30	0.413026	0.633322	A0A8I6YH11
GO:0009415	response to water	1	30	0.413026	0.633322	A0A8I6YH11
GO:0032870	cellular response to hormone stimulus	1	30	0.413026	0.633322	A0A8I7BEZ0
GO:0048869	cellular developmental process	1	30	0.413026	0.633322	Q673G6
GO:1903047	mitotic cell cycle process	1	30	0.413026	0.633322	A0A8I6WDS1
GO:0044257	cellular protein catabolic process	3	133	0.414278	0.633322	A0A8I6Y3B8;F2CRI6;F2D539
GO:0051603	proteolysis involved in cellular protein catabolic process	3	133	0.414278	0.633322	A0A8I6Y3B8;F2CRI6;F2D539
GO:0006520	cellular amino acid metabolic process	4	188	0.420399	0.640837	A0A287K5X8;A0A8I6XQX4;B5AAU3;F2DUQ7
GO:0007034	vacuolar transport	1	31	0.423421	0.641766	F2DA66
GO:0071495	cellular response to endogenous stimulus	1	31	0.423421	0.641766	A0A8I7BEZ0
GO:0044249	cellular biosynthetic process	12	633	0.430647	0.650865	A0A287K5X8;A0A287TTV1;A0A8I6WDS1;A0A8I6XEF6;A0A8I6YGF9;A0A8I7BBK6;A0A8I7BJ09;B5AAU3;F2DUQ7;F2E2F1;F2EIG1;Q673G6
GO:0033554	cellular response to stress	3	137	0.433387	0.651679	A0A8I6WDS1;A0A8I7BBK6;F2DC93
GO:0035556	intracellular signal transduction	1	32	0.433636	0.651679	F2DC93
GO:0071704	organic substance metabolic process	29	1596	0.435223	0.652029	A0A287K5X8;A0A287TTV1;A0A8I6WDS1;A0A8I6WK45;A0A8I6WWD2;A0A8I6XAW1;A0A8I6XEF6;A0A8I6XP65;A0A8I6XQX4;A0A8I6XVG7;A0A8I6Y3B8;A0A8I6YGF9;A0A8I6ZA35;A0A8I7B2U1;A0A8I7BBK6;A0A8I7BJ09;B5AAU3;F2CRI6;F2CUF4;F2D0F3;F2D539;F2D663;F2DC93;F2DIB4;F2DNP6;F2DUQ7;F2E2F1;F2EIG1;Q673G6
GO:0030163	protein catabolic process	3	139	0.442867	0.652029	A0A8I6Y3B8;F2CRI6;F2D539
GO:0080090	regulation of primary metabolic process	3	139	0.442867	0.652029	A0A8I6XEF6;A0A8I6YGF9;A0A8I7BBK6
GO:0006073	cellular glucan metabolic process	1	33	0.443674	0.652029	A0A8I6XP65
GO:0022402	cell cycle process	1	33	0.443674	0.652029	A0A8I6WDS1
GO:0032259	methylation	1	33	0.443674	0.652029	F2DKK0
GO:0044743	intracellular protein transmembrane import	1	33	0.443674	0.652029	A0A8I6YEH6
GO:0098542	defense response to other organism	1	33	0.443674	0.652029	A0A8I6XTL4
GO:0016053	organic acid biosynthetic process	3	140	0.447586	0.654165	A0A287K5X8;B5AAU3;Q673G6
GO:0046394	carboxylic acid biosynthetic process	3	140	0.447586	0.654165	A0A287K5X8;B5AAU3;Q673G6
GO:0071840	cellular component organization or biogenesis	10	529	0.450332	0.656375	A0A287MLU2;A0A287Q7U2;A0A8I6XEF6;A0A8I6XN50;A0A8I6YEH6;F2CX02;F2D0F3;F2DA66;F2EIG1;Q673G6
GO:0048522	positive regulation of cellular process	1	34	0.453538	0.657445	A0A8I6XEF6
GO:0048878	chemical homeostasis	1	34	0.453538	0.657445	A0A8I6XQR9
GO:1901576	organic substance biosynthetic process	12	643	0.454955	0.657706	A0A287K5X8;A0A287TTV1;A0A8I6WDS1;A0A8I6XEF6;A0A8I6YGF9;A0A8I7BBK6;A0A8I7BJ09;B5AAU3;F2DUQ7;F2E2F1;F2EIG1;Q673G6
GO:0070972	protein localization to endoplasmic reticulum	1	35	0.463231	0.667856	F2DVC1
GO:0006886	intracellular protein transport	4	201	0.472657	0.676091	A0A287Q7U2;A0A8I6Y060;A0A8I6YEH6;F2DVC1
GO:0022607	cellular component assembly	4	201	0.472657	0.676091	A0A287MLU2;A0A8I6XN50;F2CX02;F2D0F3
GO:0044042	glucan metabolic process	1	36	0.472755	0.676091	A0A8I6XP65
GO:0009066	aspartate family amino acid metabolic process	1	37	0.482115	0.6829	A0A287K5X8
GO:0009409	response to cold	1	37	0.482115	0.6829	A0A8I7BBZ4
GO:0044264	cellular polysaccharide metabolic process	1	37	0.482115	0.6829	A0A8I6XP65
GO:0006412	translation	4	205	0.488444	0.6829	A0A8I6XEF6;A0A8I7BBK6;F2E2F1;F2EIG1
GO:0008652	cellular amino acid biosynthetic process	2	93	0.489394	0.6829	A0A287K5X8;B5AAU3
GO:0010256	endomembrane system organization	1	38	0.491312	0.6829	A0A287Q7U2
GO:0030258	lipid modification	1	38	0.491312	0.6829	A0A287TTV1
GO:0034637	cellular carbohydrate biosynthetic process	1	38	0.491312	0.6829	A0A287TTV1
GO:0043207	response to external biotic stimulus	1	38	0.491312	0.6829	A0A8I6XTL4
GO:0051707	response to other organism	1	38	0.491312	0.6829	A0A8I6XTL4
GO:0044699	single-organism process	25	1395	0.491637	0.6829	A0A287K5X8;A0A287MLU2;A0A287TTV1;A0A8I6WDS1;A0A8I6WWD2;A0A8I6WXG8;A0A8I6XBD2;A0A8I6XEF6;A0A8I6XQR9;A0A8I6XQX4;A0A8I6XVG7;A0A8I6Y060;A0A8I6YEH6;A0A8I6ZA35;A0A8I7BBK6;A0A8I7BEZ0;A0A8I7BJ09;B5AAU3;F2CUF4;F2DA66;F2DC93;F2DUQ7;F2DVC1;F2EIG1;Q673G6
GO:0043043	peptide biosynthetic process	4	207	0.496274	0.687546	A0A8I6XEF6;A0A8I7BBK6;F2E2F1;F2EIG1
GO:1902580	single-organism cellular localization	3	151	0.498455	0.687818	A0A8I6Y060;A0A8I6YEH6;F2DVC1
GO:0007010	cytoskeleton organization	1	39	0.500349	0.687818	A0A287MLU2
GO:0016197	endosomal transport	1	39	0.500349	0.687818	F2DA66
GO:0065002	intracellular protein transmembrane transport	1	40	0.509229	0.696426	A0A8I6YEH6
GO:0071806	protein transmembrane transport	1	40	0.509229	0.696426	A0A8I6YEH6
GO:0005975	carbohydrate metabolic process	5	268	0.511751	0.69808	A0A287TTV1;A0A8I6WK45;A0A8I6XAW1;A0A8I6XP65;A0A8I6ZA35
GO:0044271	cellular nitrogen compound biosynthetic process	7	384	0.517844	0.70115	A0A287K5X8;A0A8I6XEF6;A0A8I6YGF9;A0A8I7BBK6;F2DUQ7;F2E2F1;F2EIG1
GO:0009064	glutamine family amino acid metabolic process	1	41	0.517955	0.70115	A0A287K5X8
GO:0019725	cellular homeostasis	1	41	0.517955	0.70115	A0A8I6XQR9
GO:0050896	response to stimulus	9	501	0.525629	0.709732	A0A287TTV1;A0A8I6WDS1;A0A8I6XTL4;A0A8I6YH11;A0A8I7BBK6;A0A8I7BBZ4;A0A8I7BEZ0;F2DC93;Q673G6
GO:0034645	cellular macromolecule biosynthetic process	6	330	0.527612	0.710339	A0A8I6WDS1;A0A8I6XEF6;A0A8I6YGF9;A0A8I7BBK6;F2E2F1;F2EIG1
GO:0044265	cellular macromolecule catabolic process	3	158	0.529671	0.710339	A0A8I6Y3B8;F2CRI6;F2D539
GO:0016482	cytoplasmic transport	4	216	0.53092	0.710339	A0A8I6Y060;A0A8I6YEH6;F2DA66;F2DVC1
GO:0009737	response to abscisic acid	1	43	0.534953	0.710339	A0A8I7BEZ0
GO:0016050	vesicle organization	1	43	0.534953	0.710339	F2DA66
GO:0044272	sulfur compound biosynthetic process	1	43	0.534953	0.710339	A0A8I7BJ09
GO:0044763	single-organism cellular process	20	1132	0.535425	0.710339	A0A287K5X8;A0A287MLU2;A0A287TTV1;A0A8I6WDS1;A0A8I6WWD2;A0A8I6XBD2;A0A8I6XEF6;A0A8I6XQR9;A0A8I6XQX4;A0A8I6YEH6;A0A8I6ZA35;A0A8I7BBK6;A0A8I7BEZ0;A0A8I7BJ09;B5AAU3;F2CUF4;F2DC93;F2DUQ7;F2EIG1;Q673G6
GO:0009059	macromolecule biosynthetic process	6	333	0.537016	0.710677	A0A8I6WDS1;A0A8I6XEF6;A0A8I6YGF9;A0A8I7BBK6;F2E2F1;F2EIG1
GO:0006511	ubiquitin-dependent protein catabolic process	2	102	0.539552	0.711909	A0A8I6Y3B8;F2CRI6
GO:1901566	organonitrogen compound biosynthetic process	7	392	0.541336	0.711909	A0A287K5X8;A0A8I6XEF6;A0A8I7BBK6;B5AAU3;F2DUQ7;F2E2F1;F2EIG1
GO:0006066	alcohol metabolic process	1	44	0.543231	0.711909	A0A287TTV1
GO:0009057	macromolecule catabolic process	4	220	0.545976	0.711909	A0A8I6XP65;A0A8I6Y3B8;F2CRI6;F2D539
GO:0034613	cellular protein localization	4	220	0.545976	0.711909	A0A287Q7U2;A0A8I6Y060;A0A8I6YEH6;F2DVC1
GO:0070727	cellular macromolecule localization	4	220	0.545976	0.711909	A0A287Q7U2;A0A8I6Y060;A0A8I6YEH6;F2DVC1
GO:0009607	response to biotic stimulus	1	45	0.551365	0.71543	A0A8I6XTL4
GO:0097305	response to alcohol	1	45	0.551365	0.71543	A0A8I7BEZ0
GO:1901700	response to oxygen-containing compound	2	105	0.555534	0.718384	A0A8I6YH11;A0A8I7BEZ0
GO:0000278	mitotic cell cycle	1	46	0.559358	0.718384	A0A8I6WDS1
GO:0033993	response to lipid	1	46	0.559358	0.718384	A0A8I7BEZ0
GO:0043648	dicarboxylic acid metabolic process	1	46	0.559358	0.718384	B5AAU3
GO:0009058	biosynthetic process	12	687	0.560739	0.718384	A0A287K5X8;A0A287TTV1;A0A8I6WDS1;A0A8I6XEF6;A0A8I6YGF9;A0A8I7BBK6;A0A8I7BJ09;B5AAU3;F2DUQ7;F2E2F1;F2EIG1;Q673G6
GO:0044248	cellular catabolic process	6	341	0.561744	0.718384	A0A8I6WWD2;A0A8I6XP65;A0A8I6Y3B8;F2CRI6;F2D539;F2DC93
GO:0071310	cellular response to organic substance	1	47	0.567211	0.722706	A0A8I7BEZ0
GO:0006950	response to stress	6	343	0.567841	0.722706	A0A8I6WDS1;A0A8I6XTL4;A0A8I6YH11;A0A8I7BBK6;A0A8I7BBZ4;F2DC93
GO:0019941	modification-dependent protein catabolic process	2	108	0.571135	0.725165	A0A8I6Y3B8;F2CRI6
GO:0006090	pyruvate metabolic process	1	48	0.574927	0.726458	A0A8I7BJ09
GO:0042592	homeostatic process	1	48	0.574927	0.726458	A0A8I6XQR9
GO:0043632	modification-dependent macromolecule catabolic process	2	109	0.576251	0.726458	A0A8I6Y3B8;F2CRI6
GO:0044238	primary metabolic process	25	1437	0.580282	0.728487	A0A287K5X8;A0A287TTV1;A0A8I6WDS1;A0A8I6WK45;A0A8I6XAW1;A0A8I6XEF6;A0A8I6XP65;A0A8I6XQX4;A0A8I6Y3B8;A0A8I6YGF9;A0A8I6ZA35;A0A8I7B2U1;A0A8I7BBK6;B5AAU3;F2CRI6;F2D0F3;F2D539;F2D663;F2DC93;F2DIB4;F2DNP6;F2DUQ7;F2E2F1;F2EIG1;Q673G6
GO:0016051	carbohydrate biosynthetic process	1	49	0.582508	0.728487	A0A287TTV1
GO:0043161	proteasome-mediated ubiquitin-dependent protein catabolic process	1	49	0.582508	0.728487	F2CRI6
GO:0010467	gene expression	8	465	0.583337	0.728487	A0A8I6XEF6;A0A8I6XVG7;A0A8I6YGF9;A0A8I7BBK6;F2D0F3;F2DIB4;F2E2F1;F2EIG1
GO:0044255	cellular lipid metabolic process	2	113	0.596283	0.738957	A0A287TTV1;Q673G6
GO:0006355	regulation of transcription, DNA-templated	1	51	0.597277	0.738957	A0A8I6YGF9
GO:1903506	regulation of nucleic acid-templated transcription	1	51	0.597277	0.738957	A0A8I6YGF9
GO:2001141	regulation of RNA biosynthetic process	1	51	0.597277	0.738957	A0A8I6YGF9
GO:0044267	cellular protein metabolic process	7	415	0.606416	0.748523	A0A8I6XEF6;A0A8I6Y3B8;A0A8I7BBK6;F2CRI6;F2D539;F2E2F1;F2EIG1
GO:0006913	nucleocytoplasmic transport	1	53	0.611534	0.751354	A0A8I6Y060
GO:0051169	nuclear transport	1	53	0.611534	0.751354	A0A8I6Y060
GO:0007049	cell cycle	1	55	0.625298	0.766494	A0A8I6WDS1
GO:0000272	polysaccharide catabolic process	1	56	0.631999	0.771688	A0A8I6XP65
GO:0046907	intracellular transport	5	305	0.632436	0.771688	A0A287Q7U2;A0A8I6Y060;A0A8I6YEH6;F2DA66;F2DVC1
GO:0010035	response to inorganic substance	1	57	0.638584	0.777407	A0A8I6YH11
GO:0006518	peptide metabolic process	4	247	0.641005	0.778573	A0A8I6XEF6;A0A8I7BBK6;F2E2F1;F2EIG1
GO:0019362	pyridine nucleotide metabolic process	1	58	0.645053	0.779928	A0A8I6ZA35
GO:0046496	nicotinamide nucleotide metabolic process	1	58	0.645053	0.779928	A0A8I6ZA35
GO:0009725	response to hormone	1	59	0.651409	0.784049	A0A8I7BEZ0
GO:0010498	proteasomal protein catabolic process	1	59	0.651409	0.784049	F2CRI6
GO:0019752	carboxylic acid metabolic process	6	373	0.654447	0.784406	A0A287K5X8;A0A8I6XQX4;A0A8I7BJ09;B5AAU3;F2DUQ7;Q673G6
GO:0009719	response to endogenous stimulus	1	60	0.657654	0.784406	A0A8I7BEZ0
GO:0008152	metabolic process	30	1755	0.65872	0.784406	A0A287K5X8;A0A287TTV1;A0A8I6WDS1;A0A8I6WK45;A0A8I6WWD2;A0A8I6XAW1;A0A8I6XEF6;A0A8I6XP65;A0A8I6XQX4;A0A8I6XVG7;A0A8I6Y3B8;A0A8I6YGF9;A0A8I6ZA35;A0A8I7B2U1;A0A8I7BBK6;A0A8I7BJ09;B5AAU3;F2CRI6;F2CUF4;F2D0F3;F2D539;F2D663;F2DC93;F2DIB4;F2DKK0;F2DNP6;F2DUQ7;F2E2F1;F2EIG1;Q673G6
GO:0043436	oxoacid metabolic process	6	375	0.659862	0.784406	A0A287K5X8;A0A8I6XQX4;A0A8I7BJ09;B5AAU3;F2DUQ7;Q673G6
GO:0019438	aromatic compound biosynthetic process	3	191	0.661672	0.784406	A0A8I6YGF9;B5AAU3;F2DUQ7
GO:0019637	organophosphate metabolic process	3	191	0.661672	0.784406	A0A287TTV1;A0A8I6ZA35;F2DUQ7
GO:0051649	establishment of localization in cell	5	315	0.662026	0.784406	A0A287Q7U2;A0A8I6Y060;A0A8I6YEH6;F2DA66;F2DVC1
GO:0006733	oxidoreduction coenzyme metabolic process	1	61	0.663789	0.784746	A0A8I6ZA35
GO:0006082	organic acid metabolic process	6	378	0.667894	0.787848	A0A287K5X8;A0A8I6XQX4;A0A8I7BJ09;B5AAU3;F2DUQ7;Q673G6
GO:0044260	cellular macromolecule metabolic process	12	736	0.670281	0.788362	A0A8I6WDS1;A0A8I6XEF6;A0A8I6XP65;A0A8I6Y3B8;A0A8I6YGF9;A0A8I7BBK6;F2CRI6;F2D0F3;F2D539;F2DIB4;F2E2F1;F2EIG1
GO:0006351	transcription, DNA-templated	1	63	0.675739	0.788362	A0A8I6YGF9
GO:0008610	lipid biosynthetic process	1	63	0.675739	0.788362	Q673G6
GO:0032774	RNA biosynthetic process	1	63	0.675739	0.788362	A0A8I6YGF9
GO:0097659	nucleic acid-templated transcription	1	63	0.675739	0.788362	A0A8I6YGF9
GO:0006259	DNA metabolic process	1	64	0.681557	0.791677	A0A8I6WDS1
GO:0055085	transmembrane transport	1	64	0.681557	0.791677	A0A8I6YEH6
GO:0044281	small molecule metabolic process	9	565	0.683887	0.792425	A0A287K5X8;A0A287TTV1;A0A8I6WWD2;A0A8I6XQX4;A0A8I6ZA35;A0A8I7BJ09;B5AAU3;F2DUQ7;Q673G6
GO:1902582	single-organism intracellular transport	4	261	0.68518	0.792425	A0A8I6Y060;A0A8I6YEH6;F2DA66;F2DVC1
GO:0006575	cellular modified amino acid metabolic process	1	65	0.687273	0.793122	A0A8I6XQX4
GO:1901605	alpha-amino acid metabolic process	2	135	0.694175	0.799353	A0A287K5X8;A0A8I6XQX4
GO:0015031	protein transport	4	265	0.697116	0.801006	A0A287Q7U2;A0A8I6Y060;A0A8I6YEH6;F2DVC1
GO:0045184	establishment of protein localization	4	266	0.700052	0.802646	A0A287Q7U2;A0A8I6Y060;A0A8I6YEH6;F2DVC1
GO:0022618	ribonucleoprotein complex assembly	1	68	0.703825	0.805237	F2D0F3
GO:0051252	regulation of RNA metabolic process	1	69	0.70915	0.806846	A0A8I6YGF9
GO:0071826	ribonucleoprotein complex subunit organization	1	69	0.70915	0.806846	F2D0F3
GO:0006629	lipid metabolic process	2	139	0.709782	0.806846	A0A287TTV1;Q673G6
GO:0051641	cellular localization	5	333	0.711541	0.807121	A0A287Q7U2;A0A8I6Y060;A0A8I6YEH6;F2DA66;F2DVC1
GO:0006952	defense response	1	70	0.714381	0.808619	A0A8I6XTL4
GO:0007005	mitochondrion organization	1	72	0.724569	0.817245	F2EIG1
GO:1901362	organic cyclic compound biosynthetic process	3	210	0.725074	0.817245	A0A8I6YGF9;B5AAU3;F2DUQ7
GO:0044085	cellular component biogenesis	4	276	0.728346	0.819197	A0A287MLU2;A0A8I6XN50;F2CX02;F2D0F3
GO:0006793	phosphorus metabolic process	4	278	0.733772	0.823558	A0A287TTV1;A0A8I6ZA35;A0A8I7BJ09;F2DUQ7
GO:0070887	cellular response to chemical stimulus	1	76	0.74389	0.831967	A0A8I7BEZ0
GO:0006996	organelle organization	4	282	0.744392	0.831967	A0A287MLU2;A0A8I6YEH6;F2DA66;F2EIG1
GO:0008104	protein localization	4	283	0.746998	0.83313	A0A287Q7U2;A0A8I6Y060;A0A8I6YEH6;F2DVC1
GO:0019219	regulation of nucleobase-containing compound metabolic process	1	78	0.753047	0.838119	A0A8I6YGF9
GO:0090407	organophosphate biosynthetic process	1	79	0.757504	0.84132	F2DUQ7
GO:0034641	cellular nitrogen compound metabolic process	12	784	0.762822	0.845461	A0A287K5X8;A0A8I6WDS1;A0A8I6XEF6;A0A8I6XQX4;A0A8I6YGF9;A0A8I6ZA35;A0A8I7BBK6;F2D0F3;F2DIB4;F2DUQ7;F2E2F1;F2EIG1
GO:0005976	polysaccharide metabolic process	1	81	0.766185	0.847423	A0A8I6XP65
GO:1901607	alpha-amino acid biosynthetic process	1	82	0.770411	0.847874	A0A287K5X8
GO:1901564	organonitrogen compound metabolic process	9	608	0.771696	0.847874	A0A287K5X8;A0A8I6XEF6;A0A8I6XQX4;A0A8I6ZA35;A0A8I7BBK6;B5AAU3;F2DUQ7;F2E2F1;F2EIG1
GO:0000375	RNA splicing, via transesterification reactions	1	83	0.774561	0.847874	F2D0F3
GO:0000377	RNA splicing, via transesterification reactions with bulged adenosine as nucleophile	1	83	0.774561	0.847874	F2D0F3
GO:0000398	mRNA splicing, via spliceosome	1	83	0.774561	0.847874	F2D0F3
GO:0009056	catabolic process	6	430	0.788644	0.861517	A0A8I6WWD2;A0A8I6XP65;A0A8I6Y3B8;F2CRI6;F2D539;F2DC93
GO:0009266	response to temperature stimulus	1	91	0.80523	0.877832	A0A8I7BBZ4
GO:0006396	RNA processing	2	169	0.80719	0.877868	F2D0F3;F2DIB4
GO:0010033	response to organic substance	1	92	0.808764	0.877868	A0A8I7BEZ0
GO:0071702	organic substance transport	4	310	0.810213	0.877868	A0A287Q7U2;A0A8I6Y060;A0A8I6YEH6;F2DVC1
GO:0044765	single-organism transport	4	312	0.814361	0.880569	A0A8I6Y060;A0A8I6YEH6;F2DA66;F2DVC1
GO:0006790	sulfur compound metabolic process	1	95	0.818994	0.883783	A0A8I7BJ09
GO:0008380	RNA splicing	1	96	0.822284	0.885536	F2D0F3
GO:0006457	protein folding	1	99	0.831806	0.893981	A0A8I6XN50
GO:1901575	organic substance catabolic process	5	390	0.835263	0.894979	A0A8I6WWD2;A0A8I6XP65;A0A8I6Y3B8;F2CRI6;F2D539
GO:0044710	single-organism metabolic process	12	831	0.836099	0.894979	A0A287K5X8;A0A287TTV1;A0A8I6WDS1;A0A8I6WWD2;A0A8I6XQX4;A0A8I6ZA35;A0A8I7BJ09;B5AAU3;F2CUF4;F2DUQ7;F2EIG1;Q673G6
GO:0033036	macromolecule localization	4	325	0.839613	0.895311	A0A287Q7U2;A0A8I6Y060;A0A8I6YEH6;F2DVC1
GO:0018130	heterocycle biosynthetic process	2	182	0.839775	0.895311	A0A8I6YGF9;F2DUQ7
GO:1902578	single-organism localization	4	327	0.843242	0.895623	A0A8I6Y060;A0A8I6YEH6;F2DA66;F2DVC1
GO:0044237	cellular metabolic process	23	1476	0.844712	0.895623	A0A287K5X8;A0A287TTV1;A0A8I6WDS1;A0A8I6WWD2;A0A8I6XEF6;A0A8I6XP65;A0A8I6XQX4;A0A8I6Y3B8;A0A8I6YGF9;A0A8I6ZA35;A0A8I7BBK6;A0A8I7BJ09;B5AAU3;F2CRI6;F2CUF4;F2D0F3;F2D539;F2DC93;F2DIB4;F2DUQ7;F2E2F1;F2EIG1;Q673G6
GO:0006796	phosphate-containing compound metabolic process	3	258	0.845118	0.895623	A0A287TTV1;A0A8I6ZA35;F2DUQ7
GO:0042221	response to chemical	2	187	0.850959	0.899467	A0A8I6YH11;A0A8I7BEZ0
GO:0006397	mRNA processing	1	106	0.852126	0.899467	F2D0F3
GO:0061024	membrane organization	1	108	0.857477	0.902491	F2DA66
GO:0090304	nucleic acid metabolic process	4	336	0.858762	0.902491	A0A8I6WDS1;A0A8I6YGF9;F2D0F3;F2DIB4
GO:0016052	carbohydrate catabolic process	1	109	0.860081	0.902491	A0A8I6XP65
GO:0044282	small molecule catabolic process	1	112	0.867617	0.906247	A0A8I6WWD2
GO:0006807	nitrogen compound metabolic process	13	917	0.86844	0.906247	A0A287K5X8;A0A8I6WDS1;A0A8I6XEF6;A0A8I6XQX4;A0A8I6YGF9;A0A8I6ZA35;A0A8I7BBK6;B5AAU3;F2D0F3;F2DIB4;F2DUQ7;F2E2F1;F2EIG1
GO:0006810	transport	5	411	0.86877	0.906247	A0A287Q7U2;A0A8I6Y060;A0A8I6YEH6;F2DA66;F2DVC1
GO:0051234	establishment of localization	5	414	0.873076	0.908956	A0A287Q7U2;A0A8I6Y060;A0A8I6YEH6;F2DA66;F2DVC1
GO:0006725	cellular aromatic compound metabolic process	8	615	0.877689	0.911268	A0A8I6WDS1;A0A8I6XQX4;A0A8I6YGF9;A0A8I6ZA35;B5AAU3;F2D0F3;F2DIB4;F2DUQ7
GO:0016070	RNA metabolic process	3	277	0.878722	0.911268	A0A8I6YGF9;F2D0F3;F2DIB4
GO:0009987	cellular process	32	1999	0.89378	0.92508	A0A287K5X8;A0A287MLU2;A0A287Q7U2;A0A287TTV1;A0A8I6WDS1;A0A8I6WWD2;A0A8I6XBD2;A0A8I6XEF6;A0A8I6XN50;A0A8I6XP65;A0A8I6XQR9;A0A8I6XQX4;A0A8I6Y3B8;A0A8I6YEH6;A0A8I6YGF9;A0A8I6ZA35;A0A8I7BBK6;A0A8I7BEZ0;A0A8I7BJ09;B5AAU3;F2CRI6;F2CUF4;F2CX02;F2D0F3;F2D539;F2DA66;F2DC93;F2DIB4;F2DUQ7;F2E2F1;F2EIG1;Q673G6
GO:0022613	ribonucleoprotein complex biogenesis	1	126	0.897851	0.927489	F2D0F3
GO:0016071	mRNA metabolic process	1	127	0.899731	0.92763	F2D0F3
GO:1901360	organic cyclic compound metabolic process	8	638	0.903144	0.927806	A0A8I6WDS1;A0A8I6XQX4;A0A8I6YGF9;A0A8I6ZA35;B5AAU3;F2D0F3;F2DIB4;F2DUQ7
GO:0019693	ribose phosphate metabolic process	1	129	0.90339	0.927806	A0A8I6ZA35
GO:0051179	localization	5	441	0.906892	0.929608	A0A287Q7U2;A0A8I6Y060;A0A8I6YEH6;F2DA66;F2DVC1
GO:0046483	heterocycle metabolic process	7	579	0.909573	0.930563	A0A8I6WDS1;A0A8I6XQX4;A0A8I6YGF9;A0A8I6ZA35;F2D0F3;F2DIB4;F2DUQ7
GO:0034654	nucleobase-containing compound biosynthetic process	1	135	0.913602	0.93273	A0A8I6YGF9
GO:0016310	phosphorylation	1	136	0.915198	0.93273	A0A287TTV1
GO:0009117	nucleotide metabolic process	1	143	0.92559	0.940701	A0A8I6ZA35
GO:0032787	monocarboxylic acid metabolic process	1	144	0.926969	0.940701	A0A8I7BJ09
GO:0006753	nucleoside phosphate metabolic process	1	145	0.928324	0.940701	A0A8I6ZA35
GO:0055086	nucleobase-containing small molecule metabolic process	1	162	0.947919	0.958732	A0A8I6ZA35
GO:0044723	single-organism carbohydrate metabolic process	1	166	0.951705	0.960734	A0A287TTV1
GO:0016192	vesicle-mediated transport	1	171	0.956061	0.963304	F2DA66
GO:0006139	nucleobase-containing compound metabolic process	5	518	0.964815	0.970287	A0A8I6WDS1;A0A8I6YGF9;A0A8I6ZA35;F2D0F3;F2DIB4
GO:0044712	single-organism catabolic process	1	215	0.98104	0.984298	A0A8I6WWD2
GO:1901135	carbohydrate derivative metabolic process	1	219	0.982448	0.984298	A0A8I6ZA35
GO:0008150	biological_process	45	2571	1	1	A0A287K5X8;A0A287MLU2;A0A287Q7U2;A0A287TTV1;A0A8I6WDS1;A0A8I6WK45;A0A8I6WWD2;A0A8I6WXG8;A0A8I6XAW1;A0A8I6XBD2;A0A8I6XEF6;A0A8I6XN50;A0A8I6XP65;A0A8I6XQR9;A0A8I6XQX4;A0A8I6XTL4;A0A8I6XVG7;A0A8I6Y060;A0A8I6Y3B8;A0A8I6YEH6;A0A8I6YGF9;A0A8I6YH11;A0A8I6ZA35;A0A8I7B2U1;A0A8I7BBK6;A0A8I7BBZ4;A0A8I7BEZ0;A0A8I7BJ09;B5AAU3;F2CRI6;F2CUF4;F2CX02;F2D0F3;F2D539;F2D663;F2DA66;F2DC93;F2DIB4;F2DKK0;F2DNP6;F2DUQ7;…
